# Supplementary material
Source: PubMed Central journal article supplement (PMC4390259)
Supplement: supp_O114.046573_mcp.O114.046573-1.pdf [file supp_O114.046573_mcp.O114.046573-1.pdf]

## SUPPLEMENTAL FIGURE CAPTIONS

**Supplemental Figure S1.** Extracted ion chromatograms for the K4-trimethylated H3 T3-R8 peptide and the H3 K9-R17 peptide derivatized at their n-termini by either propionylation (top graph) or by phenyl isocyanate (bottom graph).

**Supplemental Figure S2.** Comparison of the workflow of the standard Prop-x2 method with two rounds of double-propionylation (pre- and post-digest with trypsin, top) and the Prop-PIC hybrid method with pre-digest single-round propionylation and post-digest PIC-labeling (bottom).

**Supplemental Figure S3.** Workflow schematic of peptide peak identification and quantification with the Fishtones program (more documentation at <http://research-pub.gene.com/fishtones-js/howto>): MS1-browser window (**A**) with peak areas for the K4-dimethyl H3 T3-R8 peptide from purified PC9 cell histones (see Figure 5A). Blue and red traces correspond to the light and heavy channels in this SILAC experiment for each peptide's charge state. Single MS/MS events are displayed as pie-charts, depicting matched product ion intensities as a heatmap. Selecting the pie-charts opens up a mini-heatmap and annotated product ion spectra are obtained by a mouse-click. This spectrum can be expanded to a separate browser window (**B**) in which peptide identity and specific fragment ions (e.g. loss of water for the Y1-ion) can be analyzed interactively to explore alternative sequence or PTM assignments. Chromatographic peaks can be selected for quantitation (**C**), bringing up a display of the calculated areas under the curves and other relevant data.

**Supplemental Figure S4.** Comparison of peak areas for 53 H3.1 N-terminal PTMs between Prop-2x and Prop-PIC method as measured using the Fishtones application. Methylation marks are color coded blue, acetylation marks and their respective methyl-mark combinations are green, phosphorylation marks and combinations are orange. Products of propionylation side- reactions are color coded in grey. A. H3 Y41-R49. B. H3 T3-R8. C. H3 K18-R27. D. H3 K9-R17. E. H3.1 K27-R40 peptides.

**Supplemental Figure S5.** Product ion spectrum of the H3 T3-R8 phospho-T3 peptide, annotated by Fishtones. The arrow designates the neutral loss of H<sub>3</sub>PO<sub>4</sub> (calculated m/z = 431.22, detected at m/z = 431.23) from the precursor ion (calculated m/z = 480.22, detected at m/z = 480.28). The immonium ion of the propionylated K4 lysine residue is indicated by an asterisk.

**Supplemental Table 1.** Histone H3 peptides analyzed in the course of this study, displaying their sequences, molecular masses, and m/z values for their various charge states upon Prop-PIC labeling. The m/z values for peaks detected in LC-MS experiments are highlighted by color to indicate the predominant charge state(s) observed (darker colors indicate the more abundant charge states found).

**Supplemental Figure S1.** Extracted ion chromatograms for the K4-trimethylated H3 T3-R8 peptide and the H3 K9-R17 peptide derivatized at their n-termini by either propionylation (top graph) or by phenyl isocyanate (bottom graph).

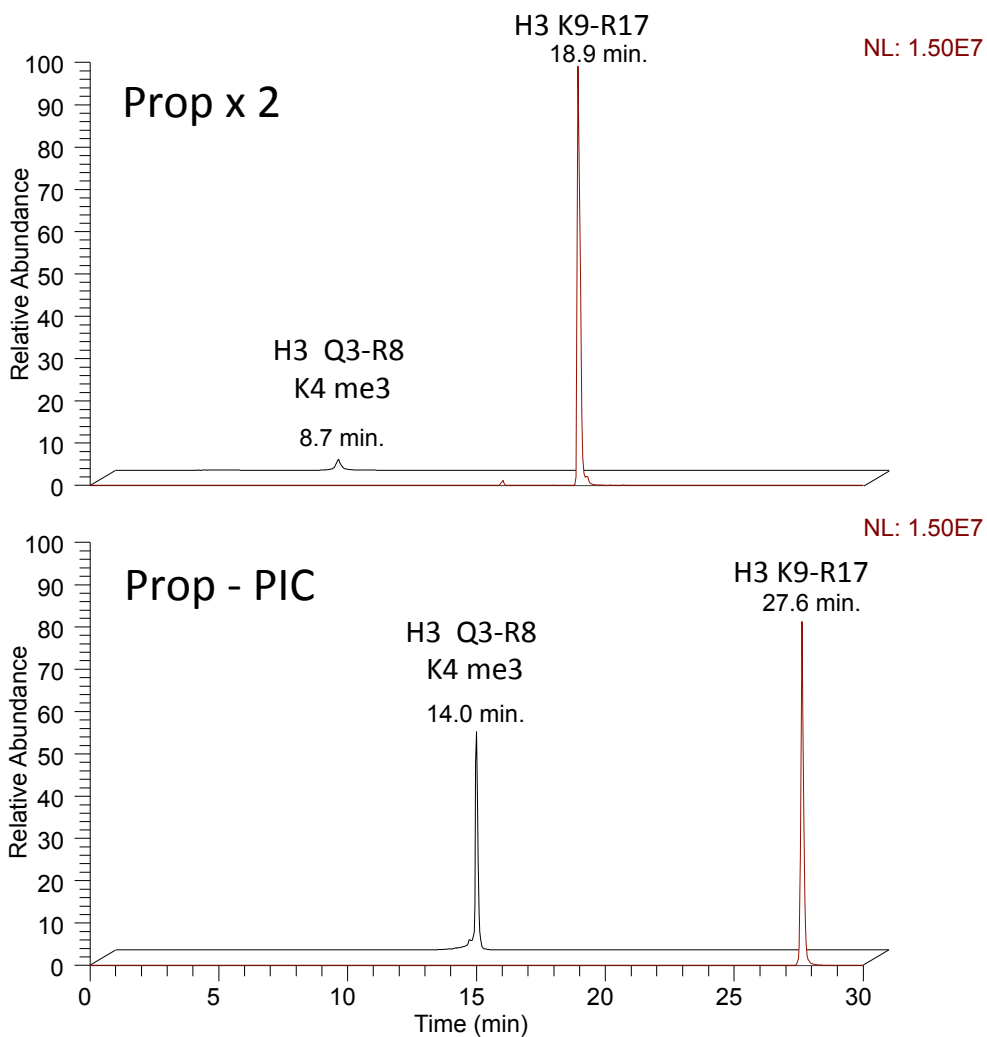

**Supplemental Figure S2.** Comparison of Prop-x2 and Prop-PIC workflows.

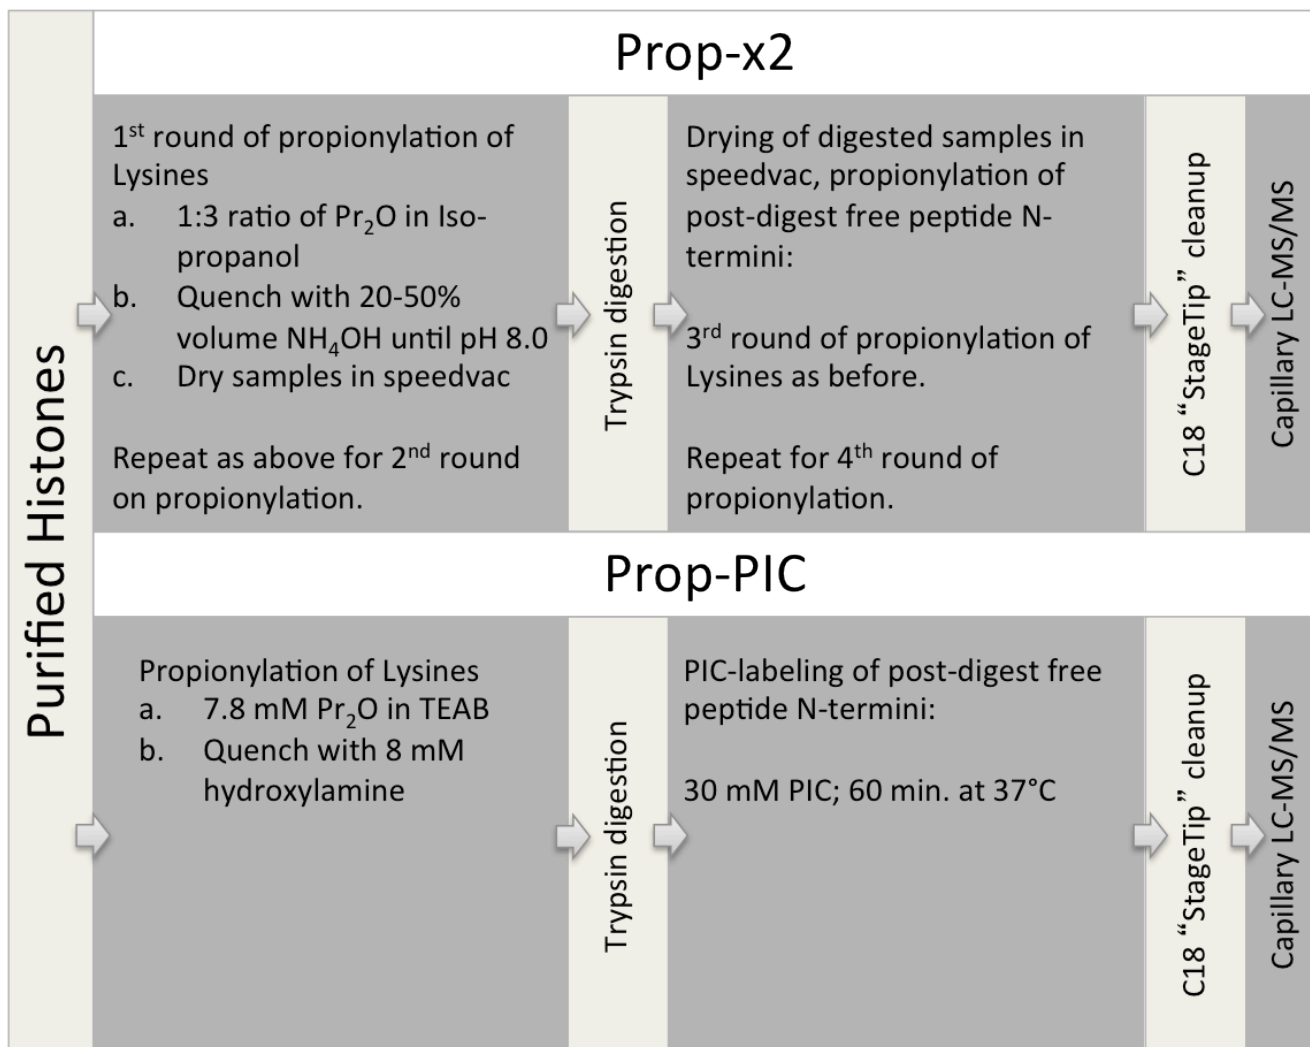

# Supplemental Figure S3. Workflow schematic of peptide peak identification and quantification with the Fishtones program.

A.

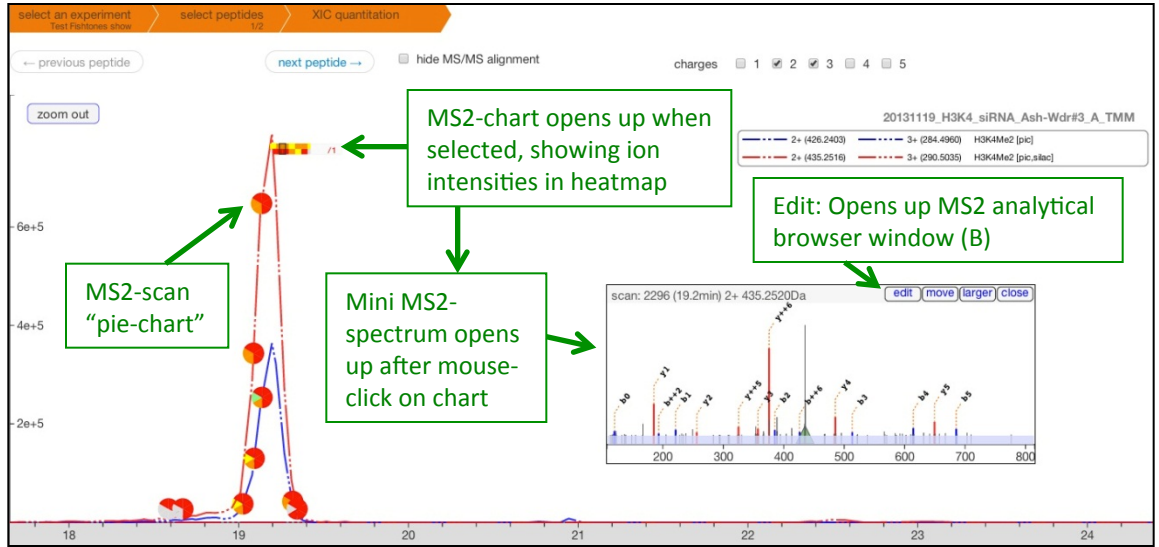

B.

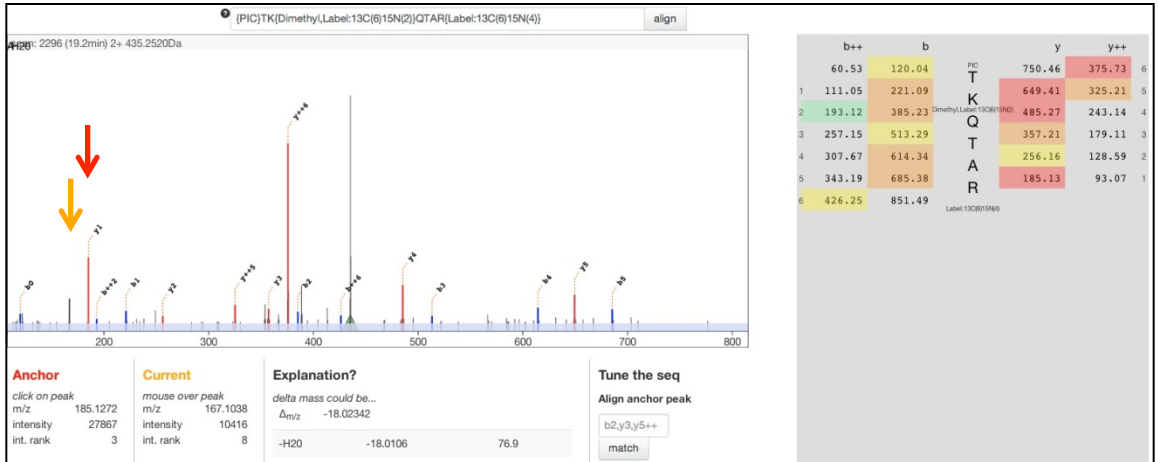

C.

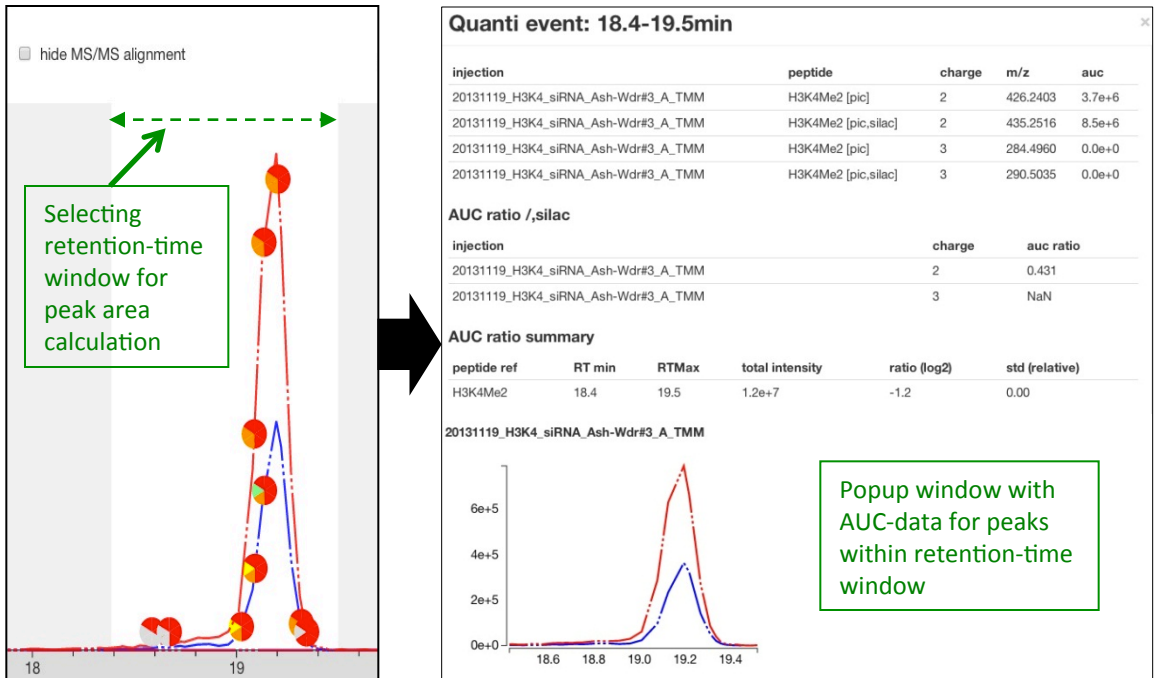

### Supplemental Figure S4.

Comparison of peak areas for 53 H3.1 N-terminal PTMs between Prop-2x and Prop-PIC method as measured using the Fishtones application.

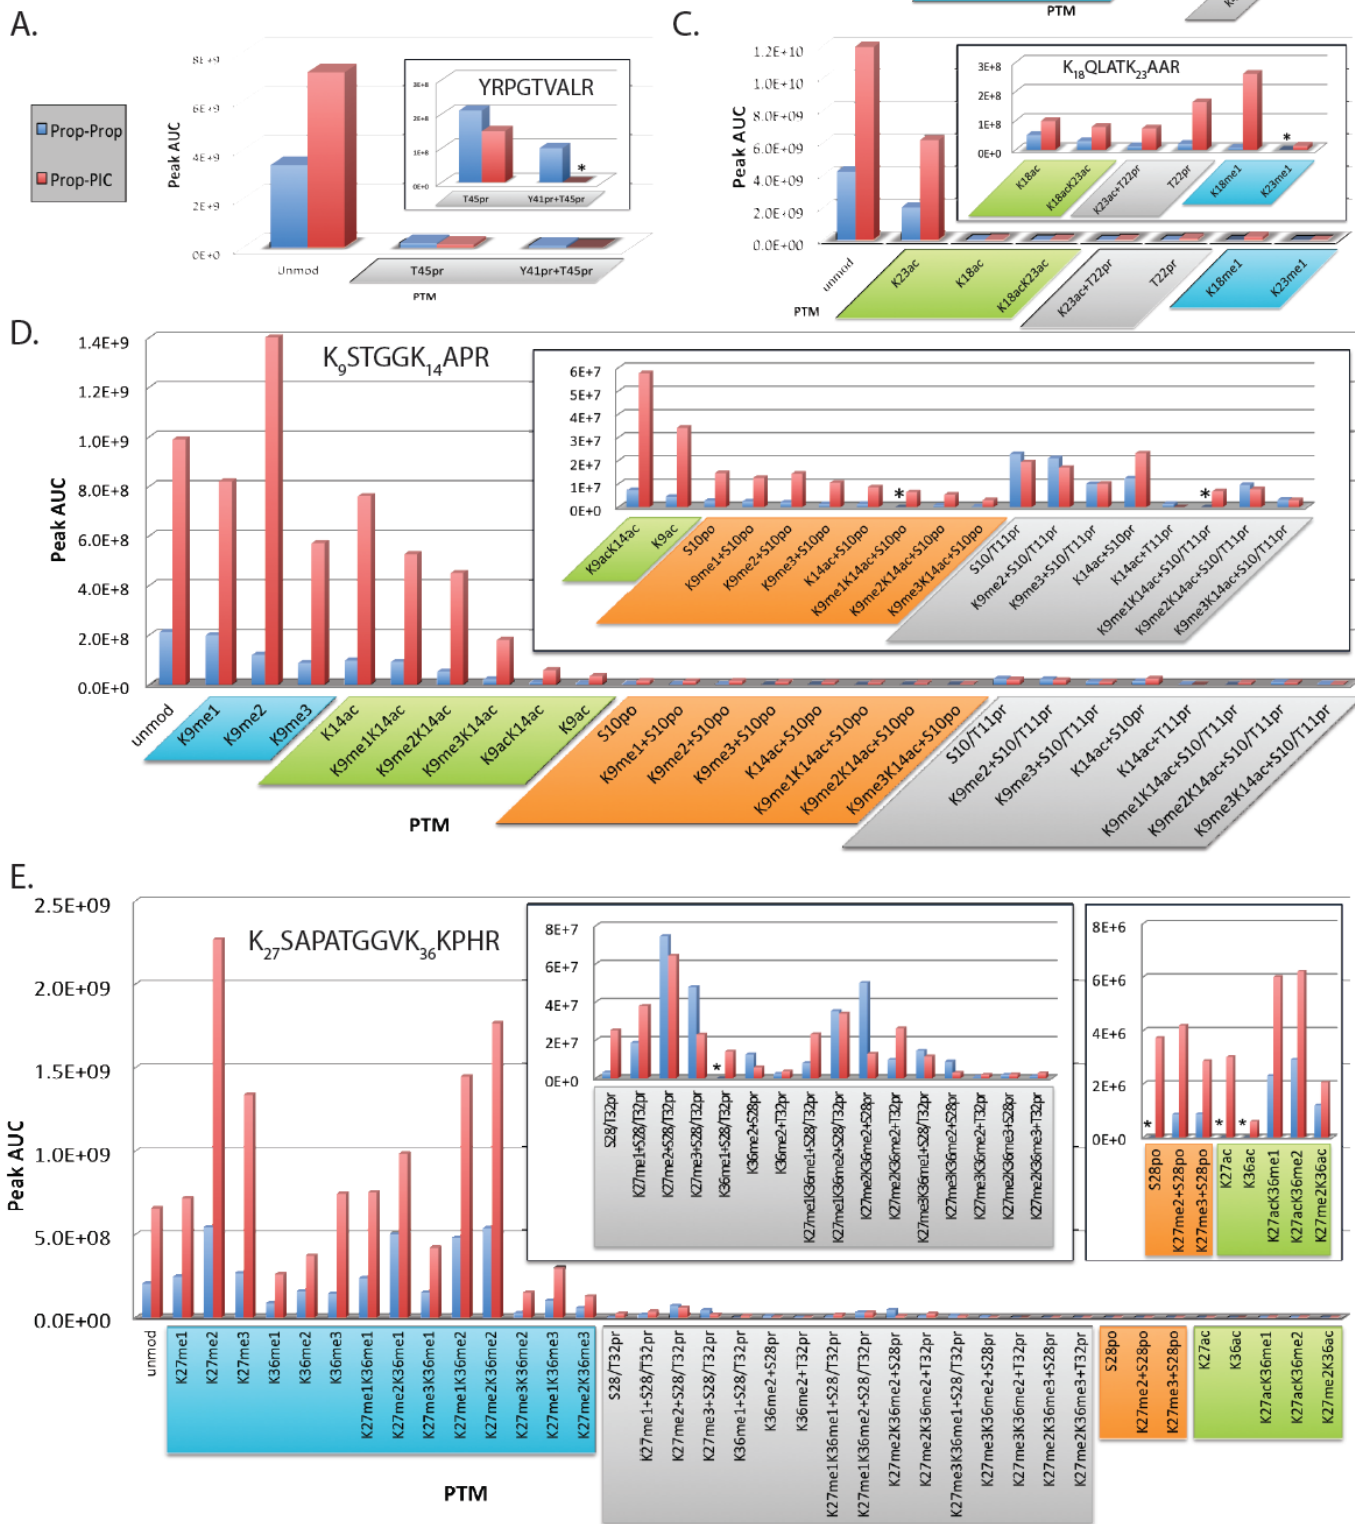

**Supplemental Figure S5.** Product ion spectrum of the H3 T3-R8 phospho-T3 peptide, annotated by Fishtones.

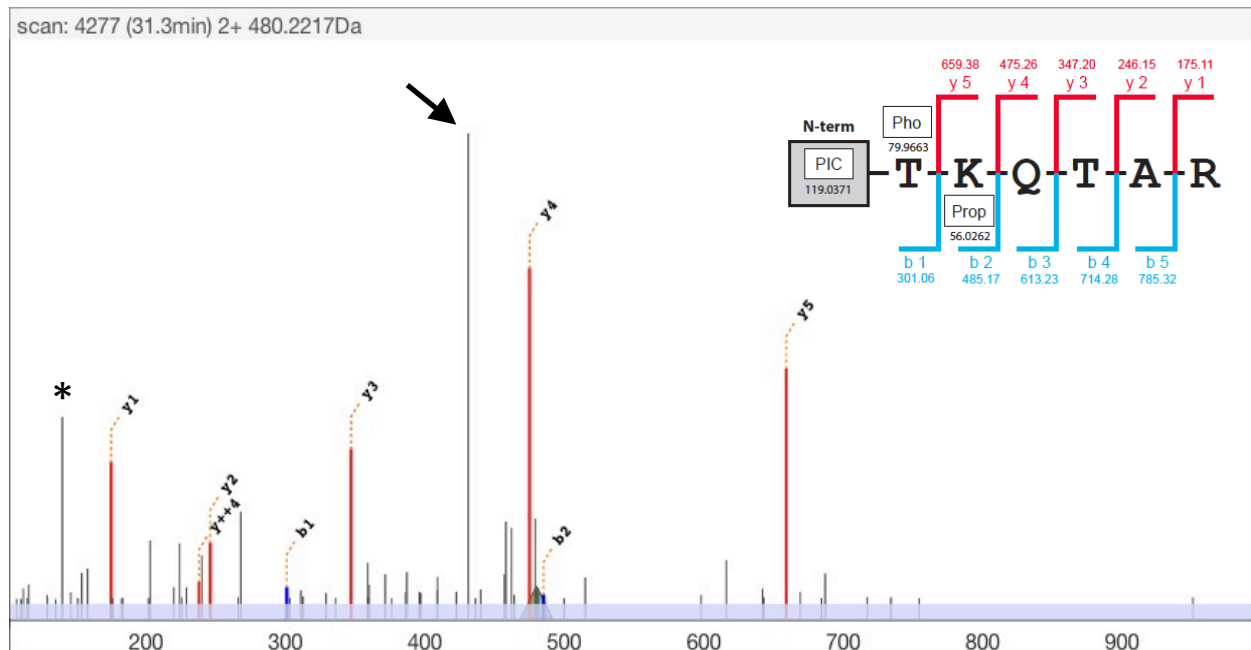

**Supplemental Table 1: Histone H3 N-terminal tail peptide masses**

|                                 | Sequence                     | M           | [M+H] <sup>+</sup> | [M+2H] <sup>2+</sup> | [M+3H] <sup>3+</sup> | [M+4H] <sup>4+</sup> |
|---------------------------------|------------------------------|-------------|--------------------|----------------------|----------------------|----------------------|
| H3T 3-R8                        | TK(Me2)QATAR                 | 850.46595   | 851.4732265        | 426.2402515          | 284.4959265          | 213.623764           |
|                                 | TK(Ac)QATAR                  | 864.44525   | 865.4525265        | 433.2299015          | 289.1556931          | 217.118589           |
|                                 | TK(Me3)QATAR                 | 864.48165   | 865.4889265        | 433.2481015          | 289.1678265          | 217.127689           |
|                                 | TK(un)QATAR                  | 878.46085   | 879.4681265        | 440.2377015          | 293.8275598          | 220.622489           |
|                                 | TK(Me1)QATAR                 | 892.47655   | 893.4838265        | 447.2455515          | 298.4994598          | 224.126414           |
|                                 | T(ph)KQATAR                  | 958.4273235 | 959.4346           | 480.221              | 320.4831             | 240.6141             |
| H3K 9-R17                       | K(Me2)STGGK(Ac)APR           | 1089.593    | 1090.600276        | 545.8037765          | 364.2049431          | 273.4055265          |
|                                 | K(Ac)STGGK(Ac)APR            | 1103.5723   | 1104.579576        | 552.7934265          | 368.8647098          | 276.9003515          |
|                                 | K(Me2)STGGK(un)APR           | 1103.6086   | 1104.615876        | 552.8115765          | 368.8768098          | 276.9094265          |
|                                 | K(Me3)STGGK(Ac)APR           | 1103.6087   | 1104.615976        | 552.8116265          | 368.8768431          | 276.9094515          |
|                                 | K(un)STGGK(Ac)APR            | 1117.5879   | 1118.595176        | 559.8012265          | 373.5365765          | 280.4042515          |
|                                 | K(Ac)STGGK(un)APR            | 1117.5879   | 1118.595176        | 559.8012265          | 373.5365765          | 280.4042515          |
|                                 | K(Me3)STGGK(un)APR           | 1117.6243   | 1118.631576        | 559.8194265          | 373.5487098          | 280.4133515          |
|                                 | K(un)STGGK(un)APR            | 1131.6035   | 1132.610776        | 566.8090265          | 378.2084431          | 283.9081515          |
|                                 | K(Me1)STGGK(Ac)APR           | 1131.6036   | 1132.610876        | 566.8090765          | 378.2084765          | 283.9081765          |
|                                 | K(Me1)STGGK(un)APR           | 1145.6192   | 1146.626476        | 573.8168765          | 382.8803431          | 287.4120765          |
|                                 | K(un)S(Ph)TGGK(un)APR        | 1211.570024 | 1212.5773          | 606.7923             | 404.8639             | 303.8998             |
|                                 | K(Me1)S(Ph)TGGK(un)APR       | 1225.585524 | 1226.5928          | 613.8                | 409.5358             | 307.4037             |
|                                 | K(Me2)S(Ph)TGGK(un)APR       | 1183.575024 | 1184.5823          | 592.7948             | 395.5323             | 296.901              |
|                                 | K(Me3)S(Ph)TGGK(un)APR       | 1197.590624 | 1198.5979          | 599.8026             | 400.2042             | 300.4049             |
|                                 | K(un)S(Ph)TGGK(Ac)APR        | 1197.554324 | 1198.5616          | 600.0677             | 400.192              | 300.3959             |
|                                 | K(Me1)S(Ph)TGGK(Ac)APR       | 1211.569924 | 1212.5772          | 606.7922             | 404.8639             | 303.8998             |
| K(Me2)S(Ph)TGGK(Ac)APR          | 1169.559424                  | 1170.5667   | 585.787            | 390.8604             | 293.3971             |                      |
| K(Me3)S(Ph)TGGK(Ac)APR          | 1183.575024                  | 1184.5823   | 592.7948           | 395.5323             | 296.901              |                      |
| H3K 18-R26                      | K(Ac)QLATK(Ac)AAR            | 1188.66145  | 1189.668726        | 595.3380015          | 397.2277598          | 298.172639           |
|                                 | K(un)QLATK(Ac)AAR            | 1202.67705  | 1203.684326        | 602.3458015          | 401.8996265          | 301.676539           |
|                                 | K(Ac)QLATK(un)AAR            | 1202.67705  | 1203.684326        | 602.3458015          | 401.8996265          | 301.676539           |
|                                 | K(un)QLATK(un)AAR            | 1216.69265  | 1217.699926        | 609.3536015          | 406.5714931          | 305.180439           |
|                                 | K(un)QLATK(Me1)AAR           | 1230.70835  | 1231.715626        | 616.3614515          | 411.2433931          | 308.684364           |
|                                 | K(Me1)QLATK(un)AAR           | 1230.70835  | 1231.715626        | 616.3614515          | 411.2433931          | 308.684364           |
| H3.1 K27-R40                    | K(Me2)SAPATGGVK(Me2)K(un)PHR | 1663.95209  | 1664.959366        | 832.9833215          | 555.6579731          | 416.995299           |
|                                 | K(Me2)SAPATGGVK(Ac)K(un)PHR  | 1677.93139  | 1678.938666        | 839.9729715          | 560.3177398          | 420.490124           |
|                                 | K(Ac)SAPATGGVK(Me2)K(un)PHR  | 1677.93139  | 1678.938666        | 839.9729715          | 560.3177398          | 420.490124           |
|                                 | K(Me2)SAPATGGVK(Me3)K(un)PHR | 1677.96779  | 1678.975066        | 839.9911715          | 560.3298731          | 420.499224           |
|                                 | K(Me3)SAPATGGVK(Me2)K(un)PHR | 1677.96779  | 1678.975066        | 839.9911715          | 560.3298731          | 420.499224           |
|                                 | K(un)SAPATGGVK(Me2)K(un)PHR  | 1691.94699  | 1692.954266        | 846.9807715          | 564.9896065          | 423.994024           |
|                                 | K(Me2)SAPATGGVK(un)K(un)PHR  | 1691.94699  | 1692.954266        | 846.9807715          | 564.9896065          | 423.994024           |
|                                 | K(un)SAPATGGVK(Ac)K(un)PHR   | 1705.92629  | 1706.933566        | 853.9704215          | 569.6493731          | 427.488849           |
|                                 | K(Ac)SAPATGGVK(un)K(un)PHR   | 1705.92629  | 1706.933566        | 853.9704215          | 569.6493731          | 427.488849           |
|                                 | K(Me1)SAPATGGVK(Me2)K(un)PHR | 1705.96269  | 1706.969966        | 853.9886215          | 569.6615065          | 427.497949           |
|                                 | K(un)SAPATGGVK(Me3)K(un)PHR  | 1705.96269  | 1706.969966        | 853.9886215          | 569.6615065          | 427.497949           |
|                                 | K(Me2)SAPATGGVK(Me1)K(un)PHR | 1705.96269  | 1706.969966        | 853.9886215          | 569.6615065          | 427.497949           |
|                                 | K(Me3)SAPATGGVK(un)K(un)PHR  | 1705.96269  | 1706.969966        | 853.9886215          | 569.6615065          | 427.497949           |
|                                 | K(un)SAPATGGVK(un)K(un)PHR   | 1719.94189  | 1720.949166        | 860.9782215          | 574.3212398          | 430.992749           |
|                                 | K(Me1)SAPATGGVK(Ac)K(un)PHR  | 1719.94199  | 1720.949266        | 860.9782715          | 574.3212731          | 430.992774           |
|                                 | K(Ac)SAPATGGVK(Me1)K(un)PHR  | 1719.94199  | 1720.949266        | 860.9782715          | 574.3212731          | 430.992774           |
|                                 | K(Me1)SAPATGGVK(Me3)K(un)PHR | 1719.97839  | 1720.985666        | 860.9964715          | 574.3334065          | 431.001874           |
|                                 | K(Me3)SAPATGGVK(Me1)K(un)PHR | 1719.97839  | 1720.985666        | 860.9964715          | 574.3334065          | 431.001874           |
|                                 | K(un)SAPATGGVK(Me1)K(un)PHR  | 1733.95759  | 1734.964866        | 867.9860715          | 578.9931398          | 434.496674           |
|                                 | K(Me1)SAPATGGVK(un)K(un)PHR  | 1733.95759  | 1734.964866        | 867.9860715          | 578.9931398          | 434.496674           |
| K(Me1)SAPATGGVK(Me1)K(un)PHR    | 1747.97329                   | 1748.980566 | 874.9939215        | 583.6650398          | 438.000599           |                      |
| K(un)S(Ph)APATGGVK(un)K(un)PHR  | 1799.908324                  | 1800.9156   | 900.9614           | 600.9767             | 450.9844             |                      |
| K(Me2)S(Ph)APATGGVK(un)K(un)PHR | 1771.913424                  | 1772.9207   | 886.964            | 591.6451             | 443.9856             |                      |
| K(Me3)S(Ph)APATGGVK(un)K(un)PHR | 1785.929024                  | 1786.9363   | 893.9718           | 596.3169             | 447.4895             |                      |
| H3 K41-R49                      | YRPGTVALR                    | 1150.624724 | 1151.632           | 576.3196             | 384.5488             | 288.6635             |
