# Supplementary material
Source: PubMed Central journal article supplement (PMC4390259)
Supplement: supp_O114.046573_mcp.O114.046573-2.pdf [file supp_O114.046573_mcp.O114.046573-2.pdf]

## Supplemental Data:

### Prop-Prop vs. Prop-PIC Fishtones Data:

- MS1-Peaks
- Area under curve (AUC) calculations
- MS2 spectra

| <b>H3 Y41-R49</b>  | <b>Pages 2-14</b> |
|--------------------|-------------------|
| H3_Y41-R49:        | 3                 |
| H3_Y41-R49_prop:   | 7                 |
| H3_Y41-R49_2xprop: | 12                |

  

| <b>H3 T3-R8</b> | <b>Pages 15-42</b> |
|-----------------|--------------------|
| H3K4un:         | 16                 |
| H3K4un_prop:    | 20                 |
| H3K4me1:        | 24                 |
| H3K4me1_prop:   | 28                 |
| H3K4me2:        | 31                 |
| H3K4me3:        | 35                 |
| H3K4ac:         | 39                 |

| <b>H3 K9-R17</b>         | <b>Pages 43-144</b> |
|--------------------------|---------------------|
| H3K9un:                  | 44                  |
| H3K9unS10po:             | 48                  |
| H3K9unS10orT11prop:      | 52                  |
| H3K9me1:                 | 56                  |
| H3K9me1S10po:            | 60                  |
| H3K9me2:                 | 64                  |
| H3K9me2S10po:            | 68                  |
| H3K9me2S10prop:          | 72                  |
| H3K9me3:                 | 76                  |
| H3K9me3S10po:            | 80                  |
| H3K9me3S10prop:          | 84                  |
| H3K9ac:                  | 88                  |
| H3K14ac:                 | 92                  |
| H3S10poK14ac:            | 96                  |
| H3S10propK14ac:          | 100                 |
| H3T11propK14ac:          | 104                 |
| H3K9me1K14ac:            | 107                 |
| H3K9me1S10poK14ac:       | 111                 |
| H3K9me1S10/T11propK14ac: | 114                 |
| H3K9me2K14ac:            | 117                 |
| H3K9me2S10poK14ac:       | 121                 |
| H3K9me2S10/T11propK14ac: | 125                 |
| H3K9me3K14ac:            | 129                 |
| H3K9me3S10poK14ac:       | 133                 |
| H3K9me3S10/T11propK14ac: | 137                 |
| H3K9acK14ac:             | 141                 |

  

| <b>H3 K18-R26</b> | <b>Pages 145-176</b> |
|-------------------|----------------------|
| H3K18un:          | 146                  |
| H3K18unT22prop:   | 150                  |
| H3K18me1:         | 154                  |
| H3K18ac:          | 158                  |
| H3K23ac:          | 163                  |
| H3K23me1:         | 166                  |
| H3T22propK23ac:   | 169                  |
| H3K18ack23ac:     | 173                  |

| <b>H3 K27-R40</b>          | <b>Pages 177-337</b> |
|----------------------------|----------------------|
| H3K27un:                   | 178                  |
| H3K27S28po:                | 182                  |
| H3K27S28/T32prop:          | 185                  |
| H3K27me1:                  | 189                  |
| H3K27me1S28/T32prop:       | 193                  |
| H3K27me2:                  | 197                  |
| H3K27me2S28po:             | 201                  |
| H3K27me2S28/T32prop:       | 205                  |
| H3K27me3:                  | 209                  |
| H3K27me3S28po:             | 213                  |
| H3K27me3S28/T32prop:       | 217                  |
| H3K27ac:                   | 221                  |
| H3K36me1:                  | 224                  |
| H3K36me1S28/T32prop:       | 228                  |
| H3K36me2:                  | 231                  |
| H3K36me2S28prop:           | 235                  |
| H3K36me2T32prop:           | 239                  |
| H3K36me3:                  | 243                  |
| H3K36ac:                   | 248                  |
| H3K27me1K36me1:            | 251                  |
| H3K27me1K36me1S28/T32prop: | 255                  |
| H3K27me2K36me1:            | 259                  |
| H3K27me3K36me1:            | 263                  |
| H3K27me3K36me1S28/T32prop: | 267                  |
| H3K27ack36me1:             | 271                  |
| H3K27me1K36me2:            | 276                  |
| H3K27me1K36me2S28/T32prop: | 280                  |
| H3K27me2K36me2:            | 284                  |
| H3K27me2K36me2S28prop:     | 288                  |
| H3K27me2K36me2T32prop:     | 292                  |
| H3K27me3K36me2:            | 296                  |
| H3K27me3K36me2S28prop:     | 301                  |
| H3K27me3K36me2T32prop:     | 306                  |
| H3K27ack36me2:             | 311                  |
| H3K27me1K36me3:            | 315                  |
| H3K27me2K36me3:            | 319                  |
| H3K27me2K36me3S28prop:     | 324                  |
| H3K27me2K36me3T32prop:     | 329                  |
| H3K27me2K36ac:             | 334                  |

**H3\_Y41-R49**

**YRPGTVALR**

(Standard peptide)

# H3\_Y41-R49: YRPGTVALR

| id list per inj.     | peptide   | 1+       | 2+      | 3+      |
|----------------------|-----------|----------|---------|---------|
| 20130708_293THistone | YRPGTVALR | 1088.621 | 544.814 | 363.545 |
| 20130708_293THistone | YRPGTVALR | 1151.632 | 576.320 | 384.549 |

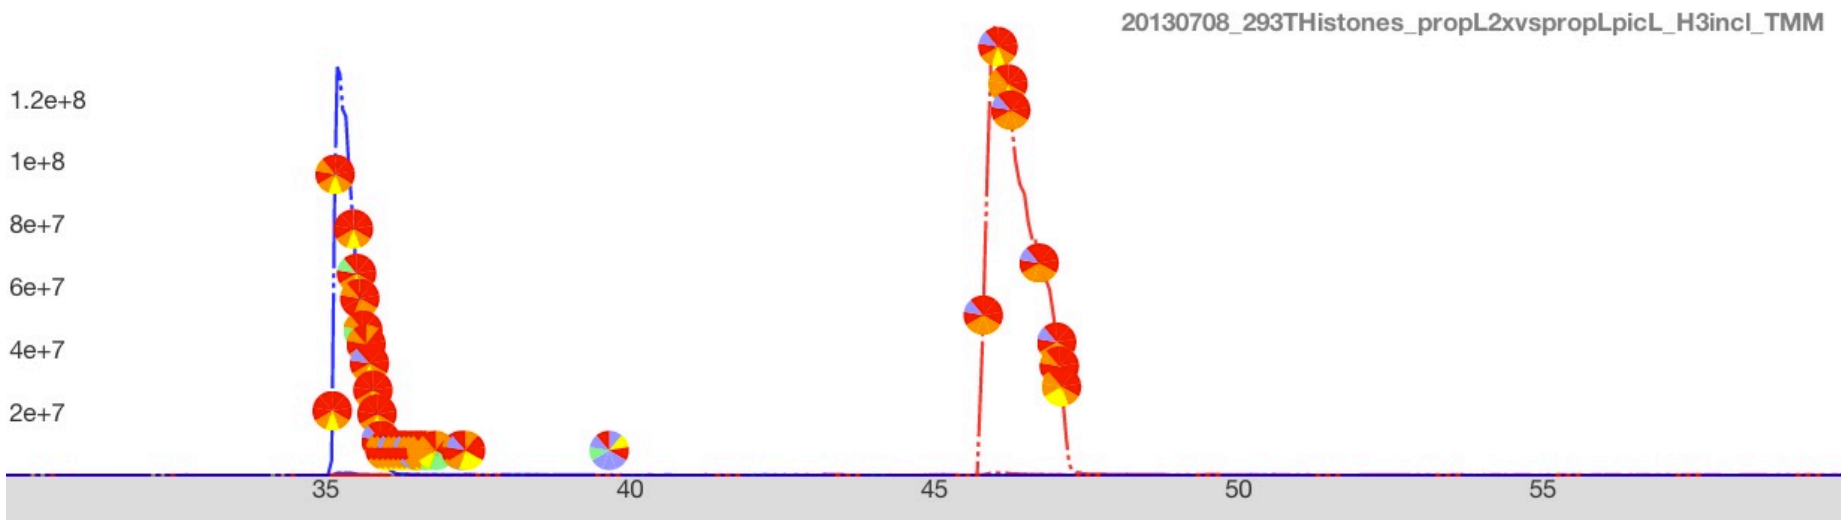

## Quanti event: 32.6-50.6min

| injection                                           | peptide   | charge | m/z      | auc    |
|-----------------------------------------------------|-----------|--------|----------|--------|
| 20130708_293THistones_propL2xvspropLpicL_H3incl_TMM | YRPGTVALR | 2      | 544.8142 | 3.4e+9 |
| 20130708_293THistones_propL2xvspropLpicL_H3incl_TMM | YRPGTVALR | 2      | 576.3196 | 7.2e+9 |
| 20130708_293THistones_propL2xvspropLpicL_H3incl_TMM | YRPGTVALR | 3      | 363.5452 | 0.0e+0 |
| 20130708_293THistones_propL2xvspropLpicL_H3incl_TMM | YRPGTVALR | 3      | 384.5488 | 3.2e+6 |

## AUC ratio /

| injection                                           | charge | auc ratio |
|-----------------------------------------------------|--------|-----------|
| 20130708_293THistones_propL2xvspropLpicL_H3incl_TMM | 2      | 0.466     |
| 20130708_293THistones_propL2xvspropLpicL_H3incl_TMM | 3      | 0.000     |

## AUC ratio summary

| peptide ref | RT min | RTMax | total intensity | ratio (log2) | std (relative) |
|-------------|--------|-------|-----------------|--------------|----------------|
| YRPGTVALR   | 32.6   | 50.6  | 1.1e+10         | -1.1         | 0.00           |

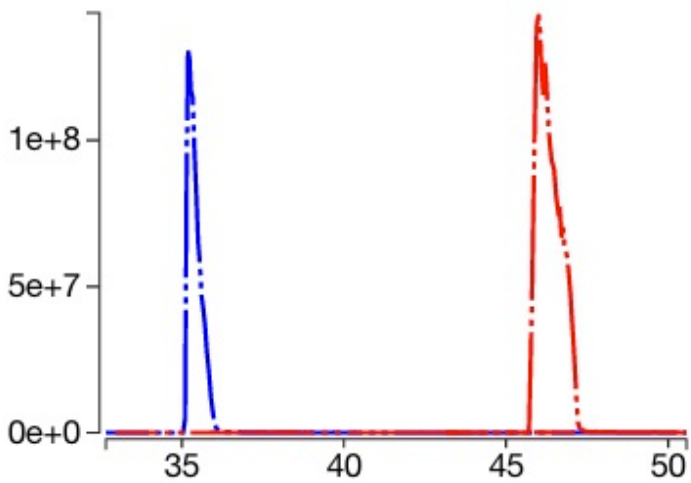

# H3\_Y41-R49: Prop-YRPGTVALR MS/MS

**Experimental spectrum**

scan 5475  
 retention time 35.5min  
 precursor m/z 544.8129  
 precursor charge 2+

**Theoretical**

M H<sup>2+</sup> 544.8142  
 MH Δ<sub>mass</sub> Da -0.0025  
 MH Δ<sub>mass</sub> ppm -2.3

**edit peptide**

{Propionyl}YRPGTVALR align

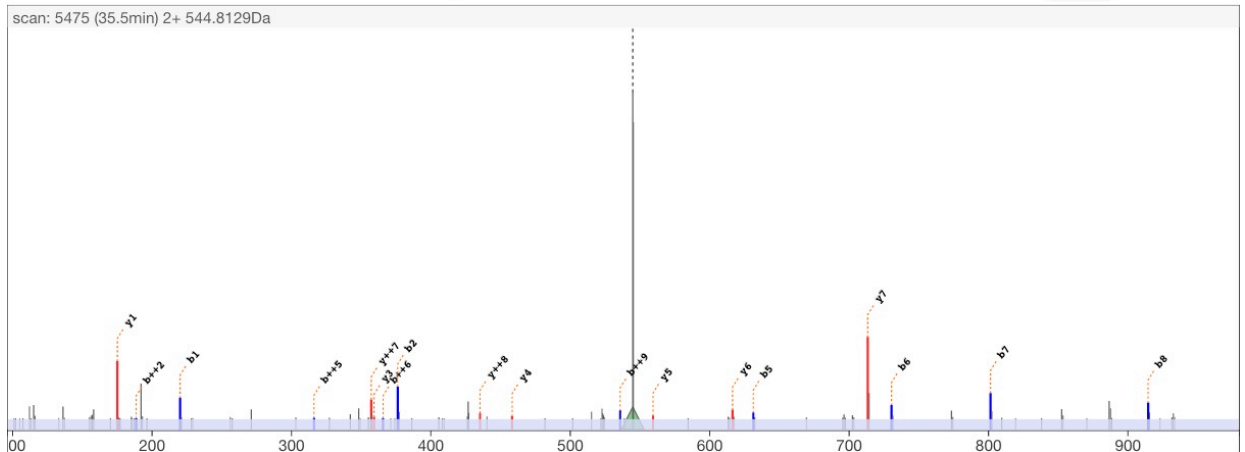

|   | b++    | b       |           | y       | y++    |
|---|--------|---------|-----------|---------|--------|
|   |        |         | Propionyl | 1032.59 | 516.80 |
| 1 | 110.55 | 220.10  | Y         | 869.53  | 435.27 |
| 2 | 188.60 | 376.20  | R         | 713.43  | 357.22 |
| 3 | 237.13 | 473.25  | P         | 616.38  | 308.69 |
| 4 | 265.64 | 530.27  | G         | 559.36  | 280.18 |
| 5 | 316.16 | 631.32  | T         | 458.31  | 229.66 |
| 6 | 365.70 | 730.39  | V         | 359.24  | 180.12 |
| 7 | 401.22 | 801.43  | A         | 288.20  | 144.61 |
| 8 | 457.76 | 914.51  | L         | 175.12  | 88.06  |
| 9 | 535.81 | 1070.61 | R         |         |        |

# H3\_Y41-R49: PIC-YRPGTVALR MS/MS

### Experimental spectrum

scan 8514  
 retention time 46.2min  
 precursor m/z 576.3182  
 precursor charge 2+

### Theoretical

M H<sup>2+</sup> 576.3196  
 MH  $\Delta_{mass}$  Da -0.0028  
 MH  $\Delta_{mass}$  ppm -2.4

### edit peptide

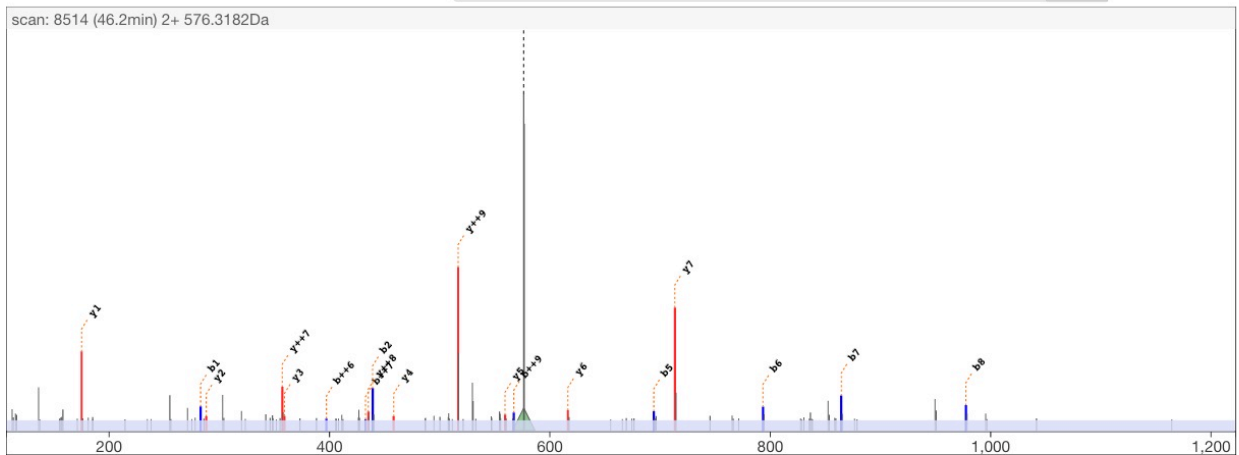

|   | b++    | b       | PIC | y       | y++    |   |
|---|--------|---------|-----|---------|--------|---|
|   | 60.53  | 120.04  | Y   | 1032.59 | 516.80 | 9 |
| 1 | 142.06 | 283.11  | R   | 869.53  | 435.27 | 8 |
| 2 | 220.11 | 439.21  | P   | 713.43  | 357.22 | 7 |
| 3 | 268.63 | 536.26  | G   | 616.38  | 308.69 | 6 |
| 4 | 297.15 | 593.28  | T   | 559.36  | 280.18 | 5 |
| 5 | 347.67 | 694.33  | V   | 458.31  | 229.66 | 4 |
| 6 | 397.20 | 793.40  | A   | 359.24  | 180.12 | 3 |
| 7 | 432.72 | 864.44  | L   | 288.20  | 144.61 | 2 |
| 8 | 489.26 | 977.52  | R   | 175.12  | 88.06  | 1 |
| 9 | 567.31 | 1133.62 |     |         |        |   |

# H3\_Y41-R49:

## YRPGT**Prop**VALR

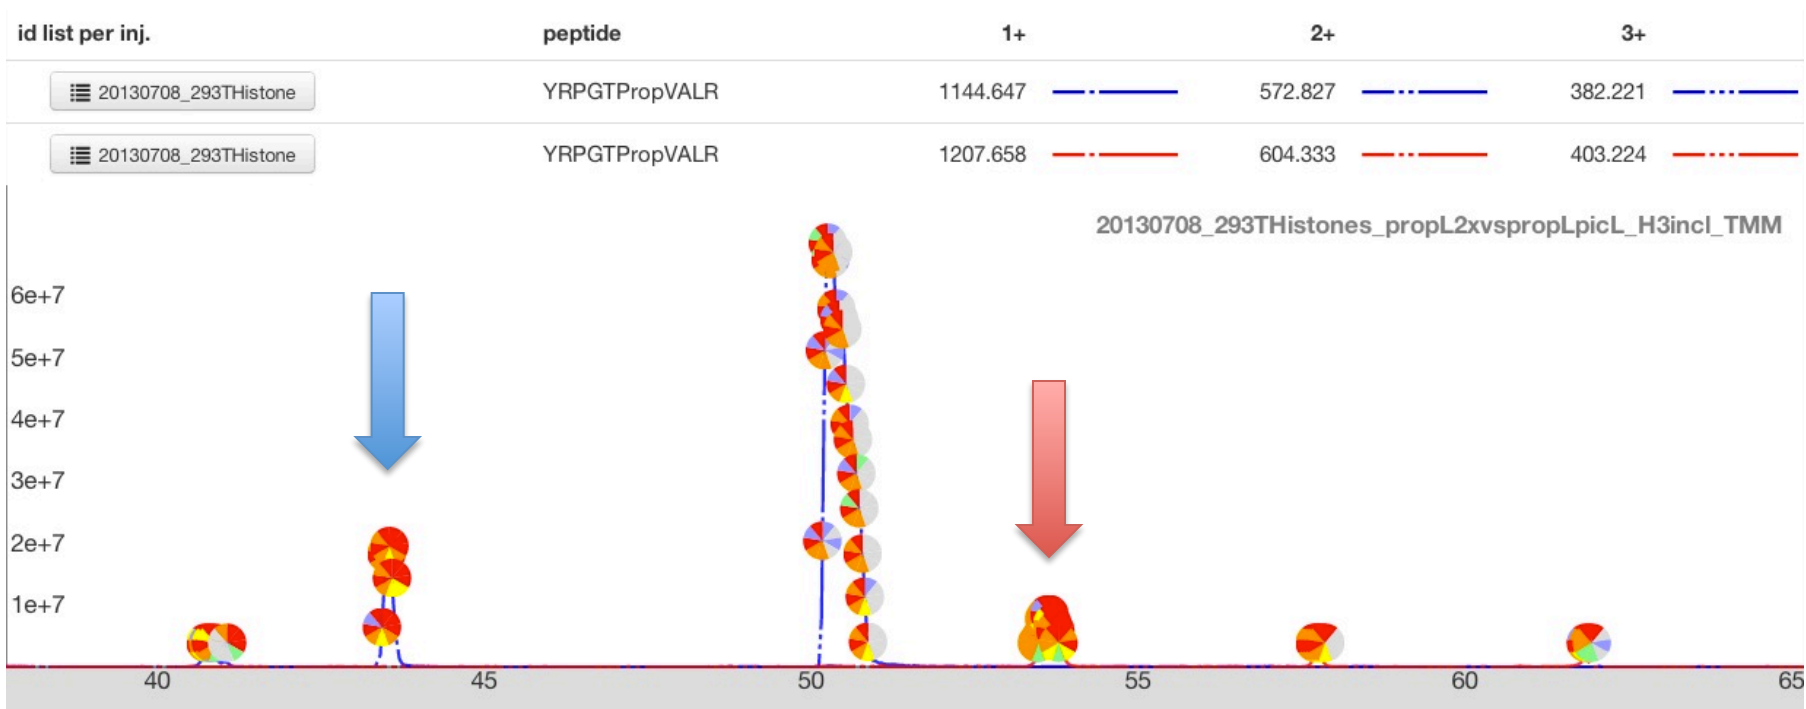

# H3\_Y41-R49\_T-prop: YRPGTPropVALR

← previous peptide      next peptide →

| id list per inj.     | peptide       | 1+       | 2+      | 3+      |
|----------------------|---------------|----------|---------|---------|
| 20130708_293THistone | YRPGTPropVALR | 1144.647 | 572.827 | 382.221 |
| 20130708_293THistone | YRPGTPropVALR | 1207.658 | 604.333 | 403.224 |

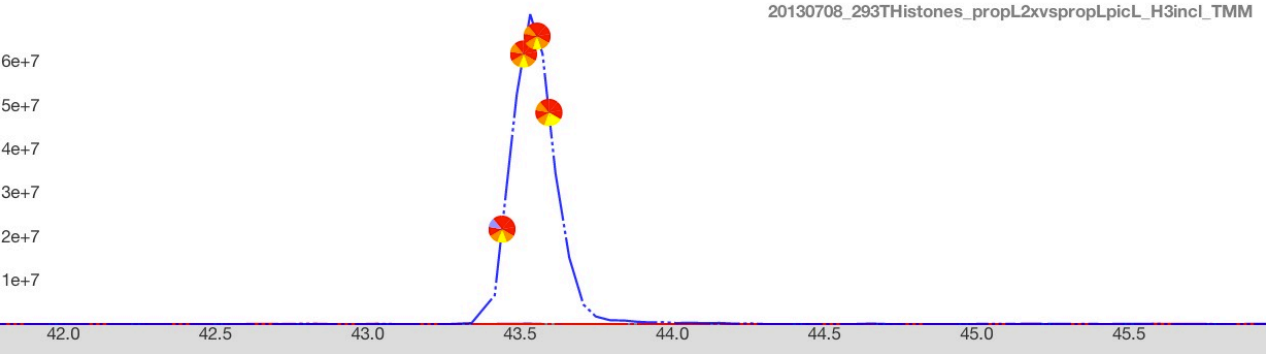

| id list per inj.     | peptide       | 1+       | 2+      | 3+      |
|----------------------|---------------|----------|---------|---------|
| 20130708_293THistone | YRPGTPropVALR | 1144.647 | 572.827 | 382.221 |
| 20130708_293THistone | YRPGTPropVALR | 1207.658 | 604.333 | 403.224 |

zoom out

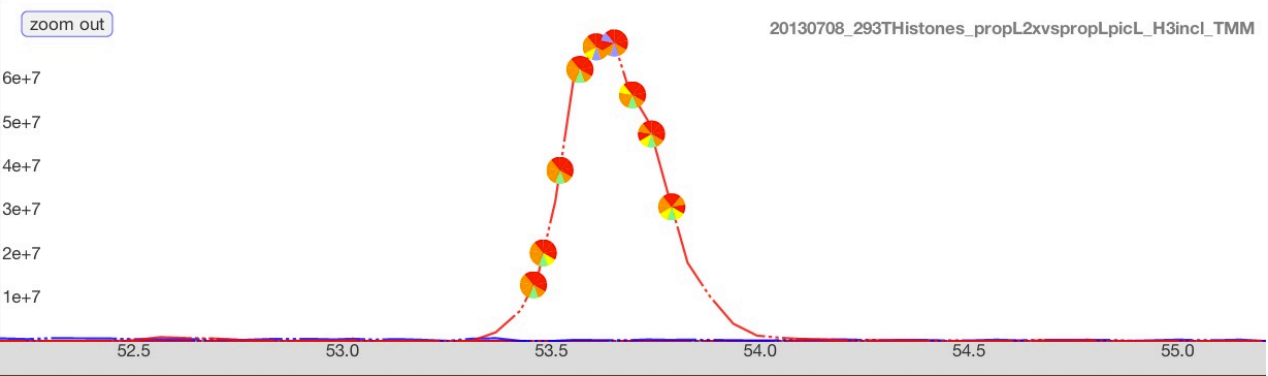



# H3\_Y41-R49\_T-prop: YRPGTPropVALR

## Quanti event: 42.9-44.1min

| injection                                           | peptide       | charge | m/z       | auc    |
|-----------------------------------------------------|---------------|--------|-----------|--------|
| 20130708_293THistones_propL2xvspropLpicL_H3incl_TMM | YRPGTPropVALR | 1      | 1144.6473 | 1.1e+5 |
| 20130708_293THistones_propL2xvspropLpicL_H3incl_TMM | YRPGTPropVALR | 1      | 1207.6582 | 0.0e+0 |
| 20130708_293THistones_propL2xvspropLpicL_H3incl_TMM | YRPGTPropVALR | 2      | 572.8273  | 2.1e+8 |
| 20130708_293THistones_propL2xvspropLpicL_H3incl_TMM | YRPGTPropVALR | 2      | 604.3327  | 0.0e+0 |
| 20130708_293THistones_propL2xvspropLpicL_H3incl_TMM | YRPGTPropVALR | 3      | 382.2206  | 0.0e+0 |
| 20130708_293THistones_propL2xvspropLpicL_H3incl_TMM | YRPGTPropVALR | 3      | 403.2243  | 6.6e+4 |

### AUC ratio /

| injection                                           | charge | auc ratio |
|-----------------------------------------------------|--------|-----------|
| 20130708_293THistones_propL2xvspropLpicL_H3incl_TMM | 1      | Infinity  |
| 20130708_293THistones_propL2xvspropLpicL_H3incl_TMM | 2      | Infinity  |
| 20130708_293THistones_propL2xvspropLpicL_H3incl_TMM | 3      | 0.000     |

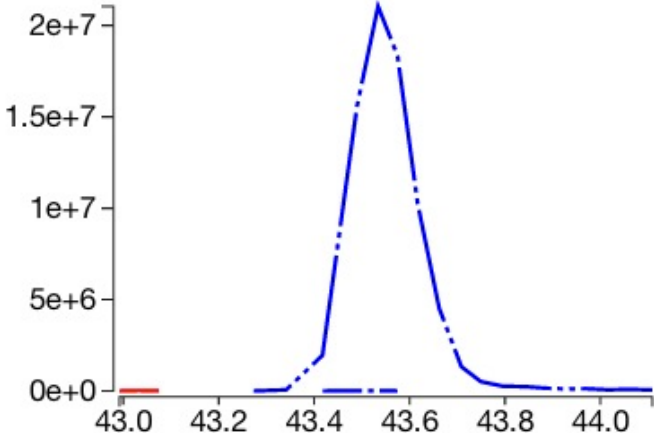

## Quanti event: 53.0-54.4min

| injection                                           | peptide       | charge | m/z       | auc    |
|-----------------------------------------------------|---------------|--------|-----------|--------|
| 20130708_293THistones_propL2xvspropLpicL_H3incl_TMM | YRPGTPropVALR | 1      | 1144.6473 | 0.0e+0 |
| 20130708_293THistones_propL2xvspropLpicL_H3incl_TMM | YRPGTPropVALR | 1      | 1207.6582 | 0.0e+0 |
| 20130708_293THistones_propL2xvspropLpicL_H3incl_TMM | YRPGTPropVALR | 2      | 572.8273  | 2.1e+6 |
| 20130708_293THistones_propL2xvspropLpicL_H3incl_TMM | YRPGTPropVALR | 2      | 604.3327  | 1.5e+8 |
| 20130708_293THistones_propL2xvspropLpicL_H3incl_TMM | YRPGTPropVALR | 3      | 382.2206  | 0.0e+0 |
| 20130708_293THistones_propL2xvspropLpicL_H3incl_TMM | YRPGTPropVALR | 3      | 403.2243  | 0.0e+0 |

### AUC ratio /

| injection                                           | charge | auc ratio |
|-----------------------------------------------------|--------|-----------|
| 20130708_293THistones_propL2xvspropLpicL_H3incl_TMM | 1      | NaN       |
| 20130708_293THistones_propL2xvspropLpicL_H3incl_TMM | 2      | 0.015     |
| 20130708_293THistones_propL2xvspropLpicL_H3incl_TMM | 3      | NaN       |

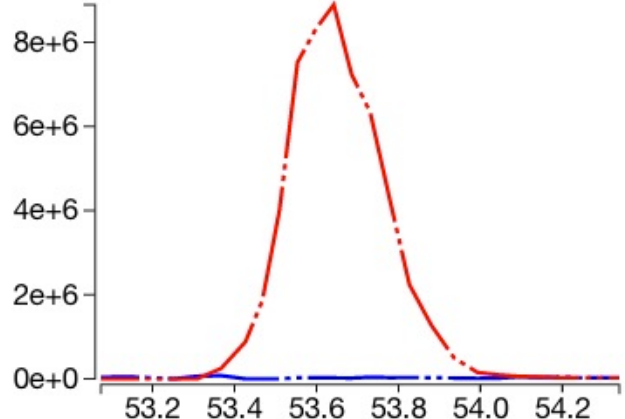

# H3\_Y41-R49\_T-prop: Prop-YRPGTPropVALR MS/MS

### Experimental spectrum

scan 7688  
 retention time 43.6min  
 precursor m/z 572.8260  
 precursor charge 2+

### Theoretical

M H<sup>2+</sup> 572.8273  
 MH  $\Delta_{mass}$  Da -0.0026  
 MH  $\Delta_{mass}$  ppm -2.3

### edit peptide

{Propionyl}YRPGT{Propionyl}VALR align

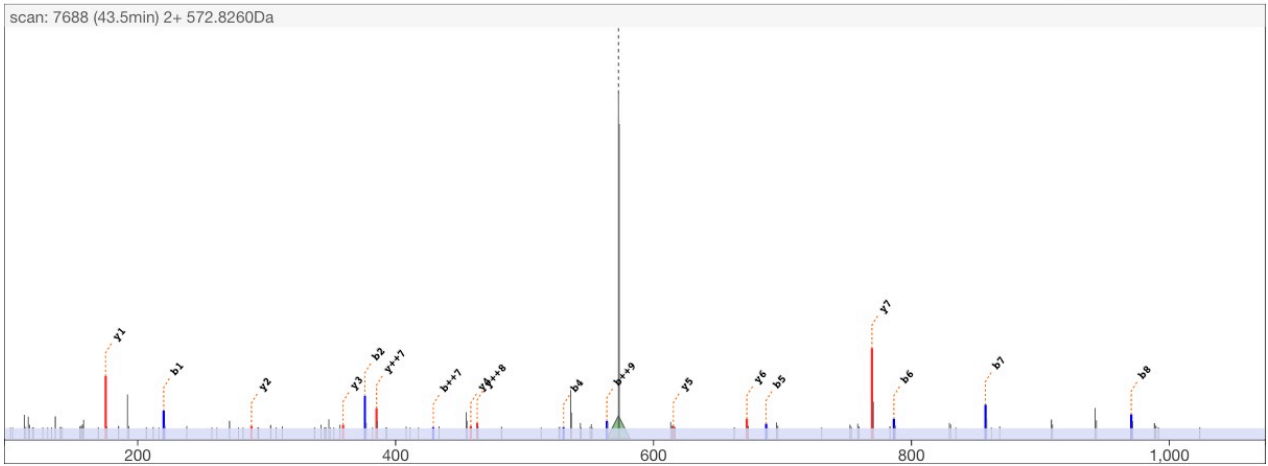

|   | b++    | b       |           | y       | y++    |   |
|---|--------|---------|-----------|---------|--------|---|
|   |        |         | Propionyl | 1088.62 | 544.81 | 9 |
| 1 | 110.55 | 220.10  | Y         | 925.56  | 463.28 | 8 |
| 2 | 188.60 | 376.20  | R         | 769.46  | 385.23 | 7 |
| 3 | 237.13 | 473.25  | P         | 672.40  | 336.71 | 6 |
| 4 | 265.64 | 530.27  | G         | 615.38  | 308.19 | 5 |
| 5 | 344.18 | 687.35  | T         | 458.31  | 229.66 | 4 |
| 6 | 393.71 | 786.41  | Propionyl | 359.24  | 180.12 | 3 |
| 7 | 429.23 | 857.45  | V         | 288.20  | 144.61 | 2 |
| 8 | 485.77 | 970.54  | A         | 175.12  | 88.06  | 1 |
| 9 | 563.82 | 1126.64 | R         |         |        |   |

# H3\_Y41-R49\_T-prop: PIC-YRPGTPropVALR MS/MS

### Experimental spectrum

scan 10851  
 retention time 53.6min  
 precursor m/z 604.3325  
 precursor charge 2+

### Theoretical

M H<sup>2+</sup> 604.3327  
 MH  $\Delta_{mass}$  Da -0.0004  
 MH  $\Delta_{mass}$  ppm -0.4

### edit peptide

{PIC}YRPGT{Propionyl}VALR align

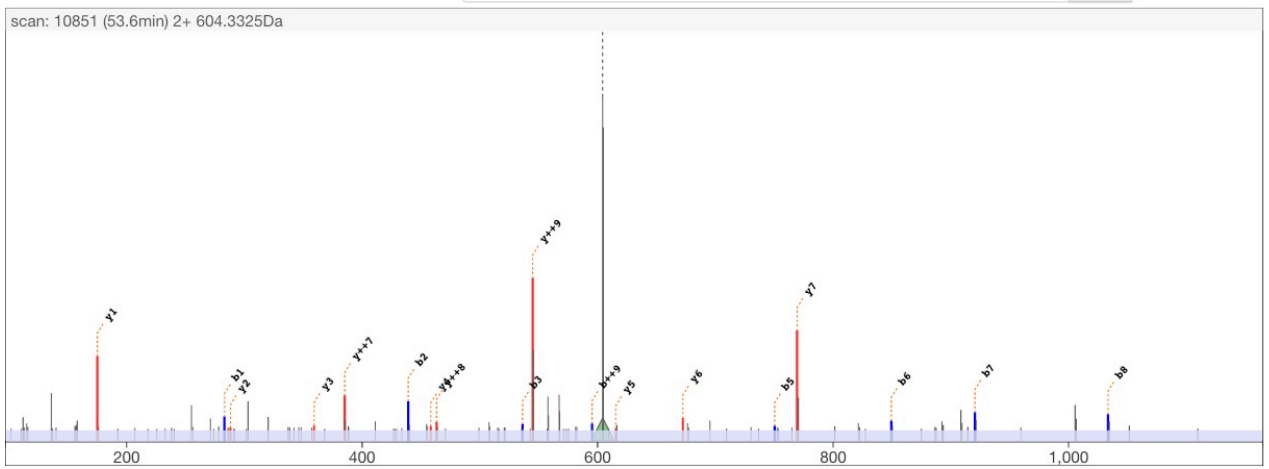

|   | b++    | b       |           | y       | y++    |   |
|---|--------|---------|-----------|---------|--------|---|
|   | 60.53  | 120.04  | PIC       | 1088.62 | 544.81 | 9 |
| 1 | 142.06 | 283.11  | Y         | 925.56  | 463.28 | 8 |
| 2 | 220.11 | 439.21  | R         | 769.46  | 385.23 | 7 |
| 3 | 268.63 | 536.26  | P         | 672.40  | 336.71 | 6 |
| 4 | 297.15 | 593.28  | G         | 615.38  | 308.19 | 5 |
| 5 | 375.68 | 750.36  | T         | 458.31  | 229.66 | 4 |
| 6 | 425.22 | 849.43  | Propionyl | 359.24  | 180.12 | 3 |
| 7 | 460.73 | 920.46  | V         | 288.20  | 144.61 | 2 |
| 8 | 517.28 | 1033.55 | A         | 175.12  | 88.06  | 1 |
| 9 | 595.33 | 1189.65 | L         |         |        |   |
|   |        |         | R         |         |        |   |

# H3\_Y41-R49:

# YPropRPGTPropVALR

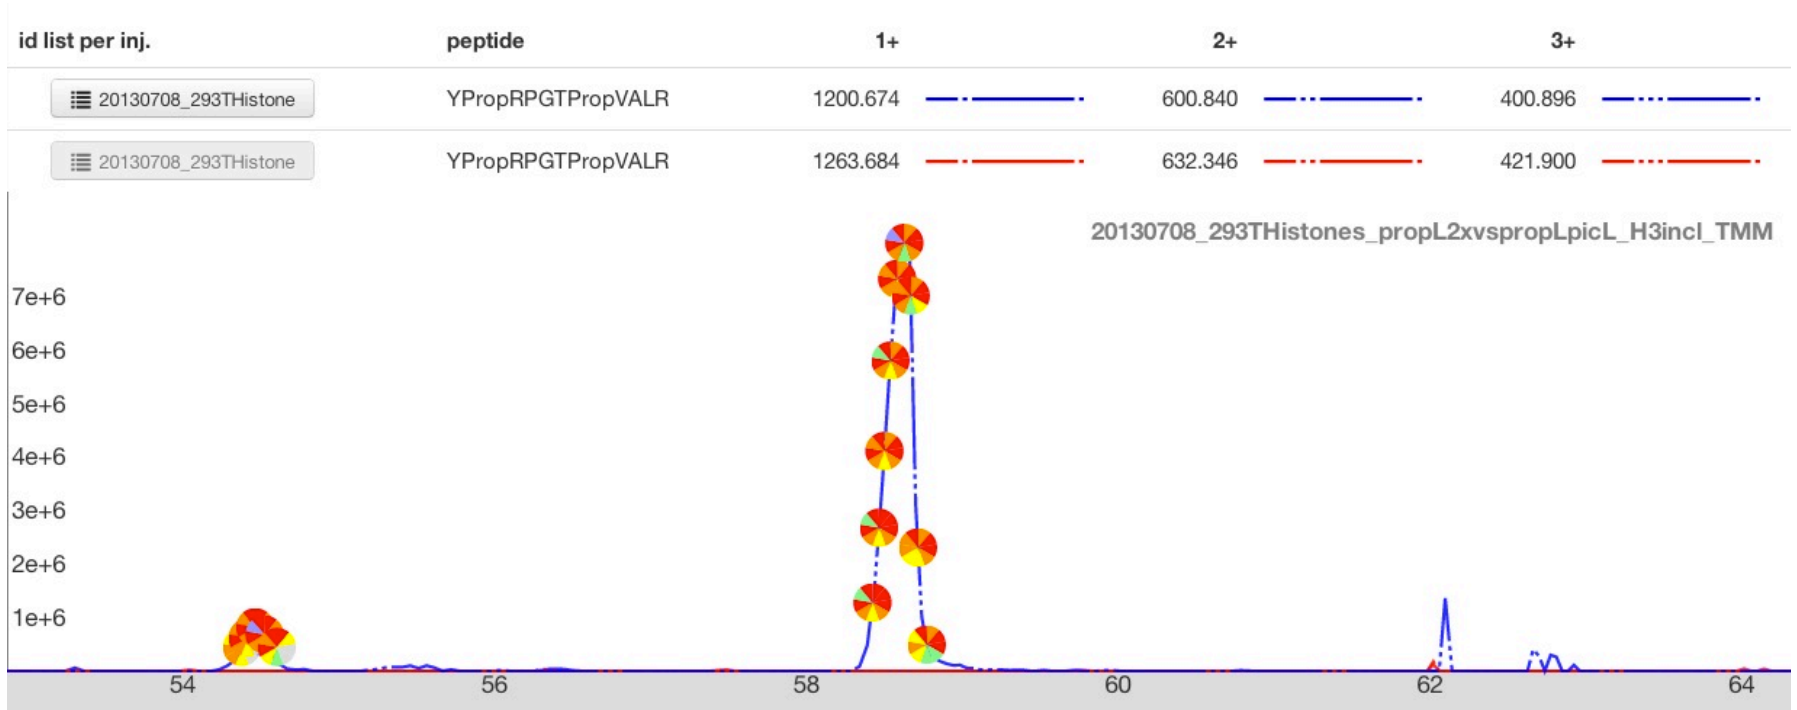

## Quanti event: 58.2-59.1min

| injection                                           | peptide           | charge | m/z       | auc    |
|-----------------------------------------------------|-------------------|--------|-----------|--------|
| 20130708_293THistones_propL2xvspropLpicL_H3incl_TMM | YPropRPGTPropVALR | 1      | 1200.6735 | 0.0e+0 |
| 20130708_293THistones_propL2xvspropLpicL_H3incl_TMM | YPropRPGTPropVALR | 1      | 1263.6844 | 0.0e+0 |
| 20130708_293THistones_propL2xvspropLpicL_H3incl_TMM | YPropRPGTPropVALR | 2      | 600.8404  | 1.0e+8 |
| 20130708_293THistones_propL2xvspropLpicL_H3incl_TMM | YPropRPGTPropVALR | 2      | 632.3459  | 0.0e+0 |
| 20130708_293THistones_propL2xvspropLpicL_H3incl_TMM | YPropRPGTPropVALR | 3      | 400.8960  | 0.0e+0 |
| 20130708_293THistones_propL2xvspropLpicL_H3incl_TMM | YPropRPGTPropVALR | 3      | 421.8997  | 0.0e+0 |

## AUC ratio /

| injection                                           | charge | auc ratio |
|-----------------------------------------------------|--------|-----------|
| 20130708_293THistones_propL2xvspropLpicL_H3incl_TMM | 1      | NaN       |
| 20130708_293THistones_propL2xvspropLpicL_H3incl_TMM | 2      | Infinity  |
| 20130708_293THistones_propL2xvspropLpicL_H3incl_TMM | 3      | NaN       |

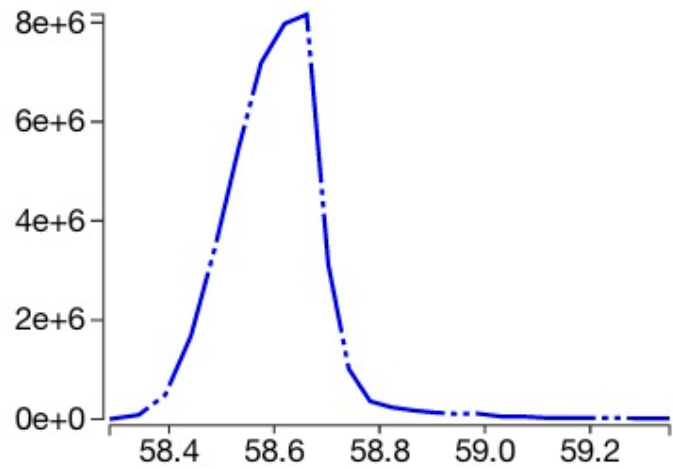

No peaks detected for PIC-labeling.

# H3\_Y41-R49\_Y&T-prop: Y(Prop)RPGT(Prop)VALR

## Experimental spectrum

scan 12373  
 retention time 58.5min  
 precursor m/z 600.8402  
 precursor charge 2+

## Theoretical

M H<sup>2+</sup> 600.8404  
 MH Δ<sub>mass</sub> Da -0.0004  
 MH Δ<sub>mass</sub> ppm -0.3

## edit peptide

{Propionyl}Y{Propionyl}RPGT{Propionyl}VALR align

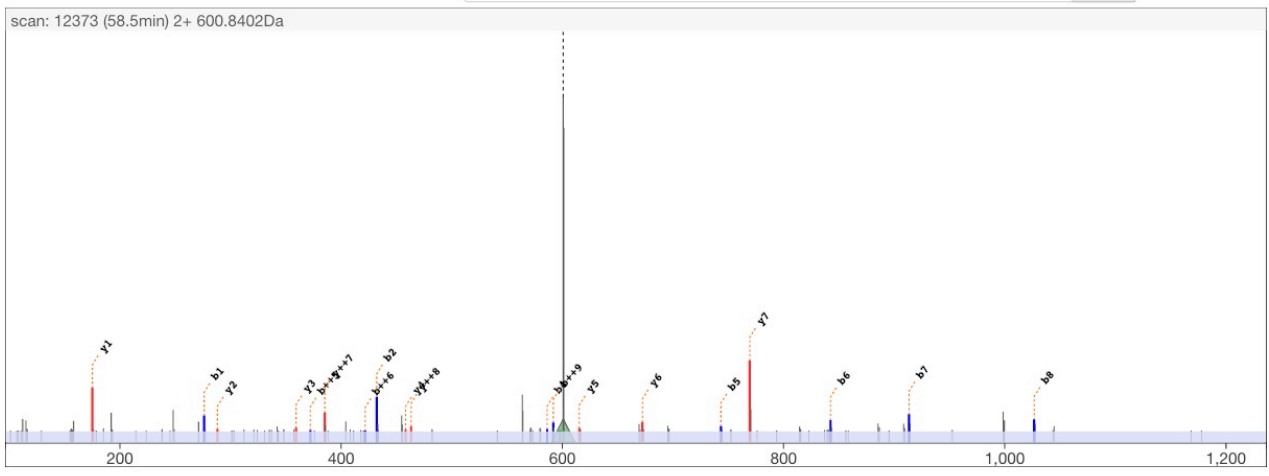

|   | b++    | b       |           | y       | y++    |   |
|---|--------|---------|-----------|---------|--------|---|
|   |        |         | Propionyl | 1144.65 | 572.83 | 9 |
| 1 | 138.57 | 276.12  | Y         |         |        |   |
|   |        |         | Propionyl | 925.56  | 463.28 | 8 |
| 2 | 216.62 | 432.22  | R         |         |        |   |
|   |        |         | P         | 769.46  | 385.23 | 7 |
| 3 | 265.14 | 529.28  | G         |         |        |   |
|   |        |         | T         | 672.40  | 336.71 | 6 |
| 4 | 293.65 | 586.30  | V         |         |        |   |
|   |        |         | Propionyl | 615.38  | 308.19 | 5 |
| 5 | 372.19 | 743.37  | A         |         |        |   |
|   |        |         | V         | 458.31  | 229.66 | 4 |
| 6 | 421.72 | 842.44  | L         |         |        |   |
|   |        |         | A         | 359.24  | 180.12 | 3 |
| 7 | 457.24 | 913.48  | R         |         |        |   |
|   |        |         | L         | 288.20  | 144.61 | 2 |
| 8 | 513.78 | 1026.56 | R         |         |        |   |
|   |        |         | R         | 175.12  | 88.06  | 1 |
| 9 | 591.84 | 1182.66 |           |         |        |   |

H3\_T3-R8

TKQ TAR

# H3\_T3-R8: TKQ TAR

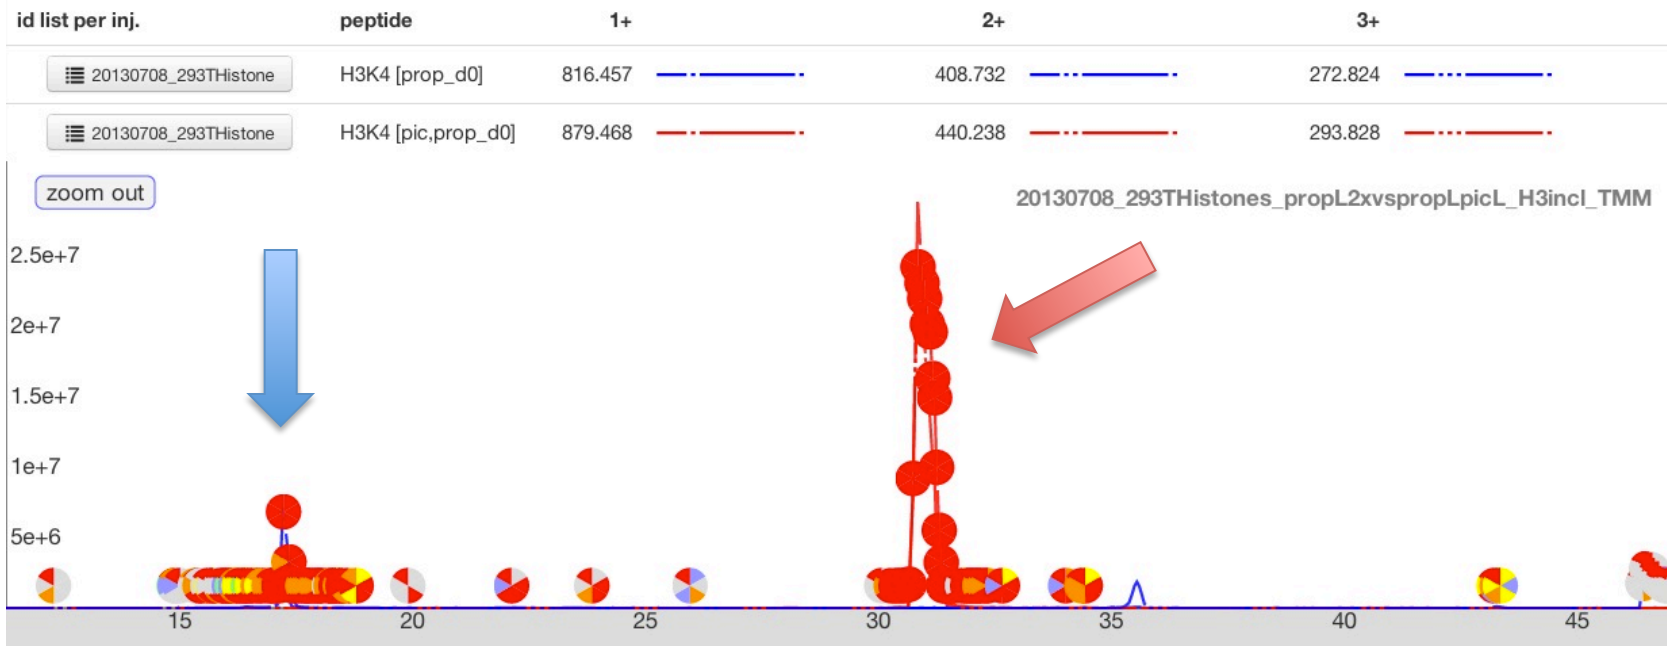



## Quanti event: 16.9-17.8min

| injection                                           | peptide            | charge | m/z      | auc    |
|-----------------------------------------------------|--------------------|--------|----------|--------|
| 20130708_293THistones_propL2xvspropLpicL_H3incl_TMM | H3K4 [prop_d0]     | 1      | 816.4574 | 1.6e+7 |
| 20130708_293THistones_propL2xvspropLpicL_H3incl_TMM | H3K4 [pic,prop_d0] | 1      | 879.4683 | 0.0e+0 |
| 20130708_293THistones_propL2xvspropLpicL_H3incl_TMM | H3K4 [prop_d0]     | 2      | 408.7323 | 7.5e+7 |
| 20130708_293THistones_propL2xvspropLpicL_H3incl_TMM | H3K4 [pic,prop_d0] | 2      | 440.2378 | 0.0e+0 |
| 20130708_293THistones_propL2xvspropLpicL_H3incl_TMM | H3K4 [prop_d0]     | 3      | 272.8240 | 0.0e+0 |
| 20130708_293THistones_propL2xvspropLpicL_H3incl_TMM | H3K4 [pic,prop_d0] | 3      | 293.8276 | 0.0e+0 |

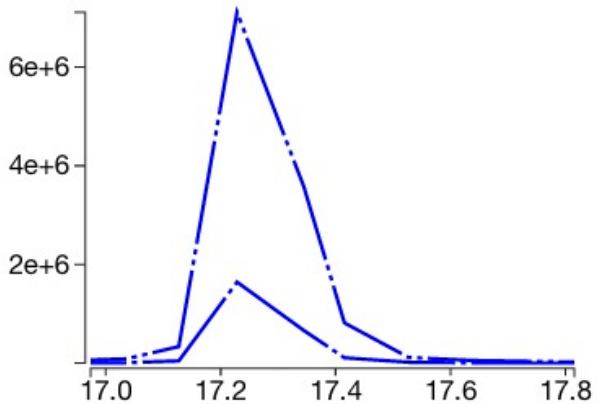

## Quanti event: 30.0-32.7min

| injection                                           | peptide            | charge | m/z      | auc    |
|-----------------------------------------------------|--------------------|--------|----------|--------|
| 20130708_293THistones_propL2xvspropLpicL_H3incl_TMM | H3K4 [prop_d0]     | 1      | 816.4574 | 0.0e+0 |
| 20130708_293THistones_propL2xvspropLpicL_H3incl_TMM | H3K4 [pic,prop_d0] | 1      | 879.4683 | 5.7e+8 |
| 20130708_293THistones_propL2xvspropLpicL_H3incl_TMM | H3K4 [prop_d0]     | 2      | 408.7323 | 2.3e+5 |
| 20130708_293THistones_propL2xvspropLpicL_H3incl_TMM | H3K4 [pic,prop_d0] | 2      | 440.2378 | 6.6e+8 |
| 20130708_293THistones_propL2xvspropLpicL_H3incl_TMM | H3K4 [prop_d0]     | 3      | 272.8240 | 0.0e+0 |
| 20130708_293THistones_propL2xvspropLpicL_H3incl_TMM | H3K4 [pic,prop_d0] | 3      | 293.8276 | 0.0e+0 |

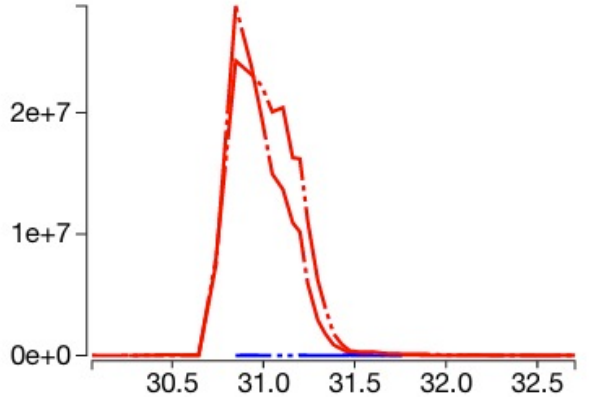

# H3\_T3-R8: Prop-TKQ TAR MS/MS

### Experimental spectrum

scan 2090  
 retention time 17.2min  
 precursor m/z 408.7322  
 precursor charge 2+

### Theoretical

M H<sup>2+</sup> 408.7323  
 MH Δ<sub>mass</sub> Da -0.0002  
 MH Δ<sub>mass</sub> ppm -0.2

### edit peptide

{Propionyl}TK{Propionyl}QTAR align

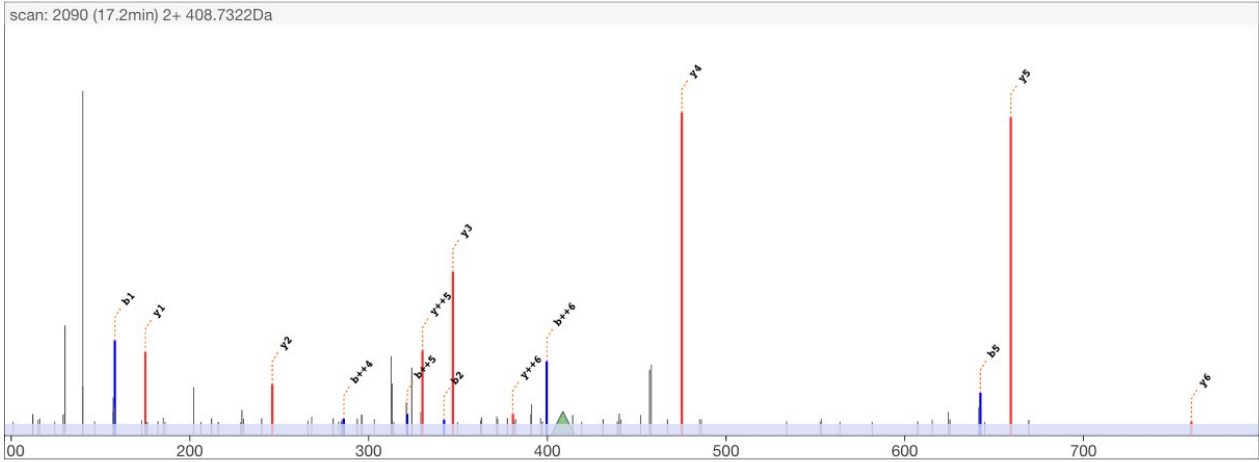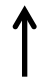

140Da diagnostic ion

|   | b++    | b      |           | y      | y++    |   |
|---|--------|--------|-----------|--------|--------|---|
|   |        |        | Propionyl | 760.43 | 380.72 | 6 |
| 1 | 79.54  | 158.08 | T         | 659.38 | 330.20 | 5 |
| 2 | 171.60 | 342.20 | K         | 475.26 | 238.13 | 4 |
| 3 | 235.63 | 470.26 | Propionyl | 347.20 | 174.11 | 3 |
| 4 | 286.16 | 571.31 | Q         | 246.16 | 123.58 | 2 |
| 5 | 321.68 | 642.35 | T         | 175.12 | 88.06  | 1 |
| 6 | 399.73 | 798.45 | A         |        |        |   |
|   |        |        | R         |        |        |   |

# H3\_T3-R8: PIC-TKQATAR MS/MS

**Experimental spectrum**  
 scan 4323  
 retention time 30.9min  
 precursor m/z 440.2374  
 precursor charge 2+

**Theoretical**  
 M H<sup>2+</sup> 440.2378  
 MH Δ<sub>mass</sub> Da -0.0008  
 MH Δ<sub>mass</sub> ppm -1.0

**edit peptide**

{PIC}TK{Propionyl}QATAR align

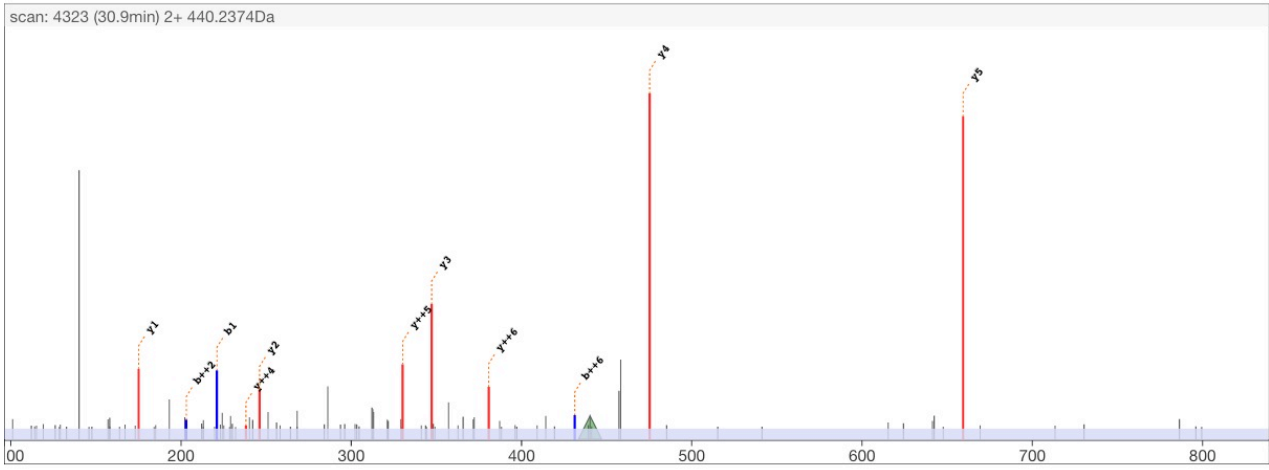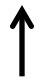

140Da diagnostic ion

|   | b++    | b      |           | y      | y++    |   |
|---|--------|--------|-----------|--------|--------|---|
|   | 60.53  | 120.04 | PIC       | 760.43 | 380.72 | 6 |
| 1 | 111.05 | 221.09 | T         | 659.38 | 330.20 | 5 |
| 2 | 203.11 | 405.21 | K         | 475.26 | 238.13 | 4 |
| 3 | 267.14 | 533.27 | Propionyl | 347.20 | 174.11 | 3 |
| 4 | 317.66 | 634.32 | Q         | 246.16 | 123.58 | 2 |
| 5 | 353.18 | 705.36 | T         | 175.12 | 88.06  | 1 |
| 6 | 431.23 | 861.46 | A         |        |        |   |
|   |        |        | R         |        |        |   |

# H3\_T3-R8:

## TKQTPropAR

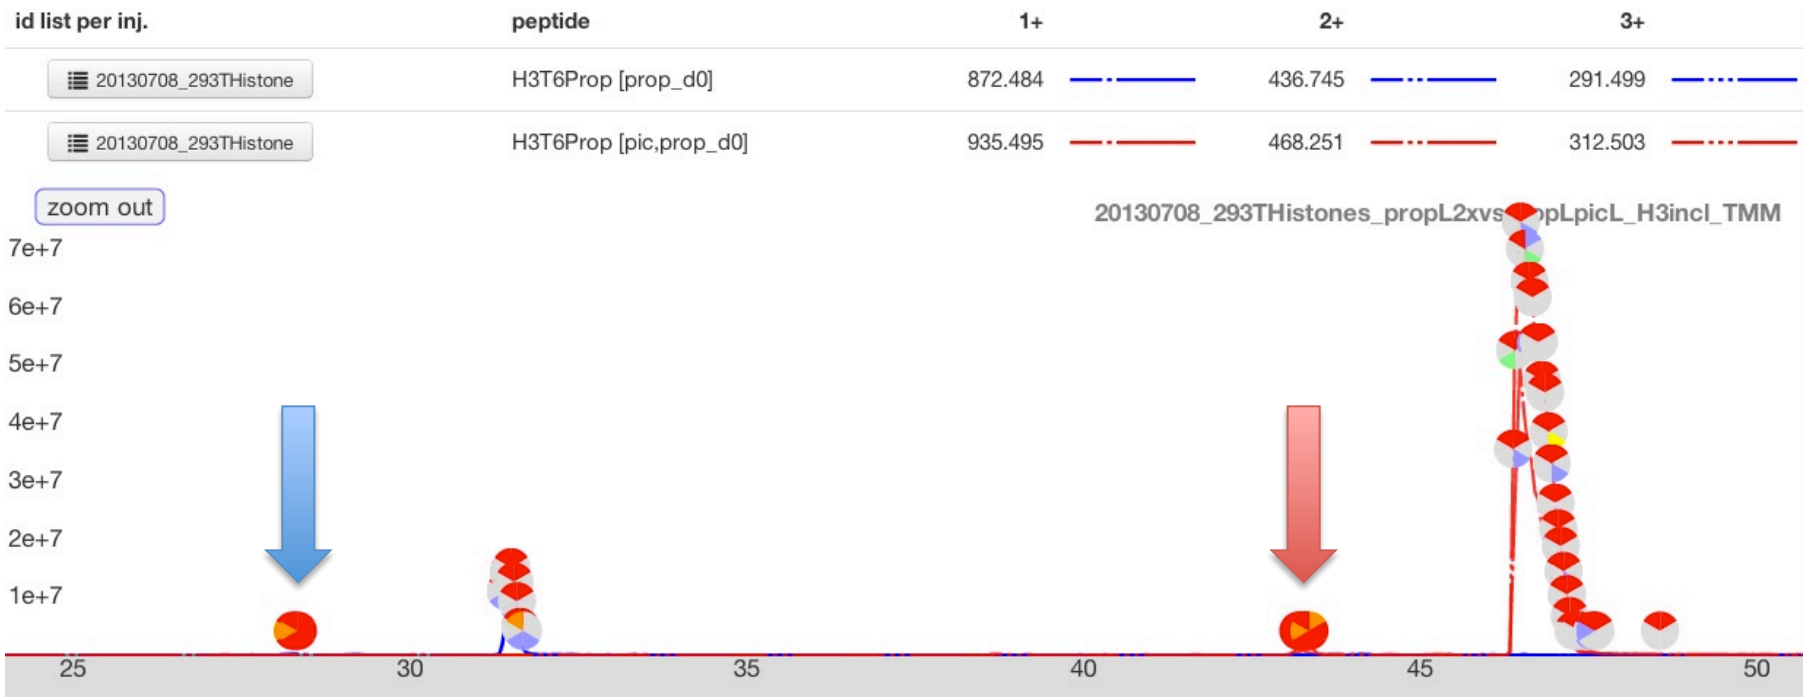

## Quanti event: 27.8-28.7min

| injection                                           | peptide                | charge | m/z      | auc    |
|-----------------------------------------------------|------------------------|--------|----------|--------|
| 20130708_293THistones_propL2xvspropLpicL_H3incl_TMM | H3T6Prop [prop_d0]     | 1      | 872.4836 | 5.6e+5 |
| 20130708_293THistones_propL2xvspropLpicL_H3incl_TMM | H3T6Prop [pic,prop_d0] | 1      | 935.4945 | 0.0e+0 |
| 20130708_293THistones_propL2xvspropLpicL_H3incl_TMM | H3T6Prop [prop_d0]     | 2      | 436.7454 | 2.2e+6 |
| 20130708_293THistones_propL2xvspropLpicL_H3incl_TMM | H3T6Prop [pic,prop_d0] | 2      | 468.2509 | 0.0e+0 |
| 20130708_293THistones_propL2xvspropLpicL_H3incl_TMM | H3T6Prop [prop_d0]     | 3      | 291.4994 | 0.0e+0 |
| 20130708_293THistones_propL2xvspropLpicL_H3incl_TMM | H3T6Prop [pic,prop_d0] | 3      | 312.5030 | 0.0e+0 |

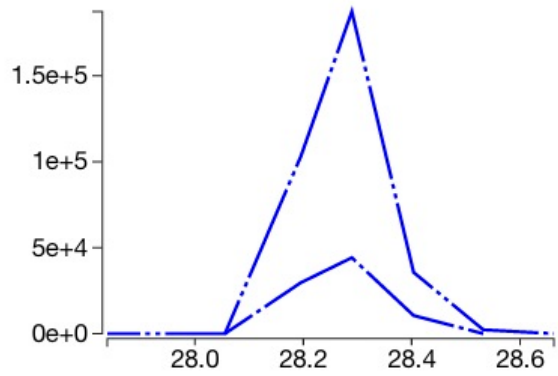

## Quanti event: 42.8-43.9min

| injection                                           | peptide                | charge | m/z      | auc    |
|-----------------------------------------------------|------------------------|--------|----------|--------|
| 20130708_293THistones_propL2xvspropLpicL_H3incl_TMM | H3T6Prop [prop_d0]     | 1      | 872.4836 | 6.1e+5 |
| 20130708_293THistones_propL2xvspropLpicL_H3incl_TMM | H3T6Prop [pic,prop_d0] | 1      | 935.4945 | 9.1e+6 |
| 20130708_293THistones_propL2xvspropLpicL_H3incl_TMM | H3T6Prop [prop_d0]     | 2      | 436.7454 | 2.7e+4 |
| 20130708_293THistones_propL2xvspropLpicL_H3incl_TMM | H3T6Prop [pic,prop_d0] | 2      | 468.2509 | 3.2e+7 |
| 20130708_293THistones_propL2xvspropLpicL_H3incl_TMM | H3T6Prop [prop_d0]     | 3      | 291.4994 | 0.0e+0 |
| 20130708_293THistones_propL2xvspropLpicL_H3incl_TMM | H3T6Prop [pic,prop_d0] | 3      | 312.5030 | 0.0e+0 |

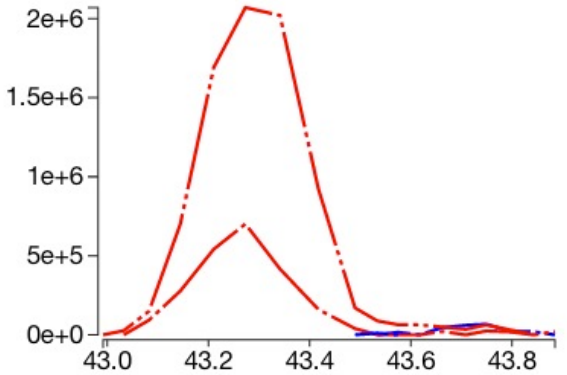

# H3\_T3-R8: Prop-TKQTPropAR MS/MS

### Experimental spectrum

scan 3902  
 retention time 28.3min  
 precursor m/z 436.7451  
 precursor charge 2+

### Theoretical

M H<sup>2+</sup> 436.7454  
 MH Δ<sub>mass</sub> Da -0.0007  
 MH Δ<sub>mass</sub> ppm -0.7

### edit peptide

{Propionyl}TK{Propionyl}QT{Propionyl}AR align

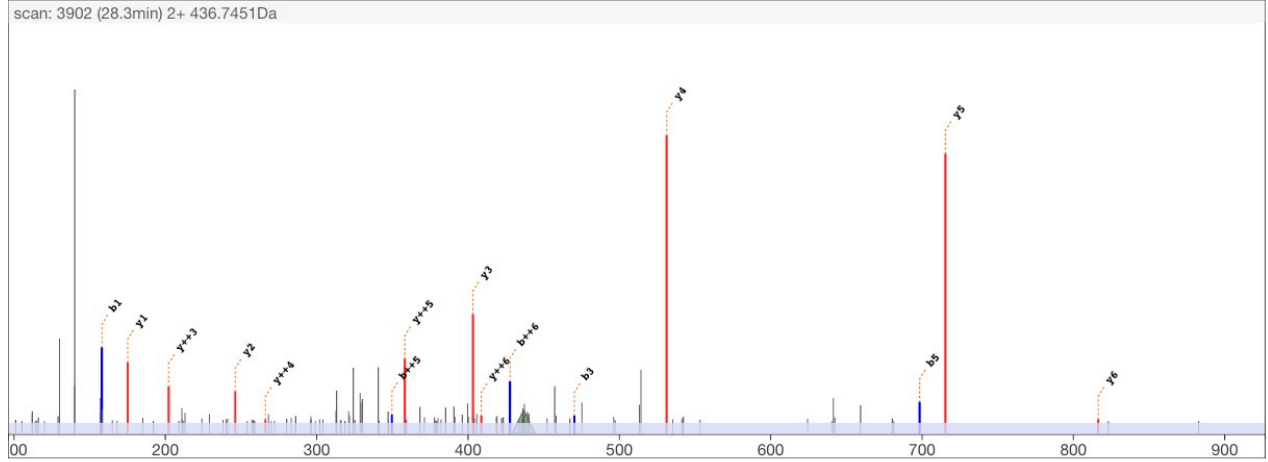

↑  
 140Da diagnostic ion

|   | b++    | b      | y      | y++    |   |
|---|--------|--------|--------|--------|---|
|   |        |        | 816.46 | 408.73 | 6 |
| 1 | 79.54  | 158.08 | 715.41 | 358.21 | 5 |
| 2 | 171.60 | 342.20 | 531.29 | 266.15 | 4 |
| 3 | 235.63 | 470.26 | 403.23 | 202.12 | 3 |
| 4 | 314.17 | 627.33 | 246.16 | 123.58 | 2 |
| 5 | 349.69 | 698.37 | 175.12 | 88.06  | 1 |
| 6 | 427.74 | 854.47 |        |        |   |

### Experimental spectrum

scan 7621  
 retention time 43.3min  
 precursor m/z 468.2505  
 precursor charge 2+

### Theoretical

M H<sup>2+</sup> 468.2509  
 MH  $\Delta_{mass}$  Da -0.0007  
 MH  $\Delta_{mass}$  ppm -0.8

### edit peptide

{PIC}TK{Propionyl}QT{Propionyl}AR align

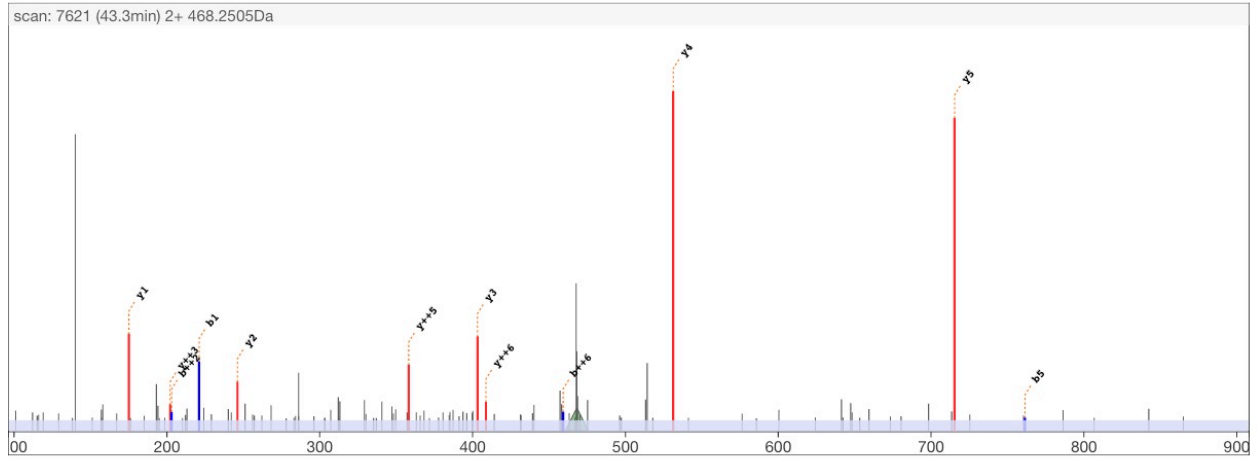

↑  
 140Da diagnostic ion

|   | b++    | b      |           | y      | y++    |   |
|---|--------|--------|-----------|--------|--------|---|
|   | 60.53  | 120.04 | PIC       | 816.46 | 408.73 | 6 |
| 1 | 111.05 | 221.09 | T         | 715.41 | 358.21 | 5 |
| 2 | 203.11 | 405.21 | K         | 531.29 | 266.15 | 4 |
| 3 | 267.14 | 533.27 | Propionyl | 403.23 | 202.12 | 3 |
| 4 | 345.68 | 690.35 | T         | 246.16 | 123.58 | 2 |
| 5 | 381.20 | 761.38 | Propionyl | 175.12 | 88.06  | 1 |
| 6 | 459.25 | 917.48 | A         |        |        |   |
|   |        |        | R         |        |        |   |

# H3\_T3-R8: TKMe1QTAR

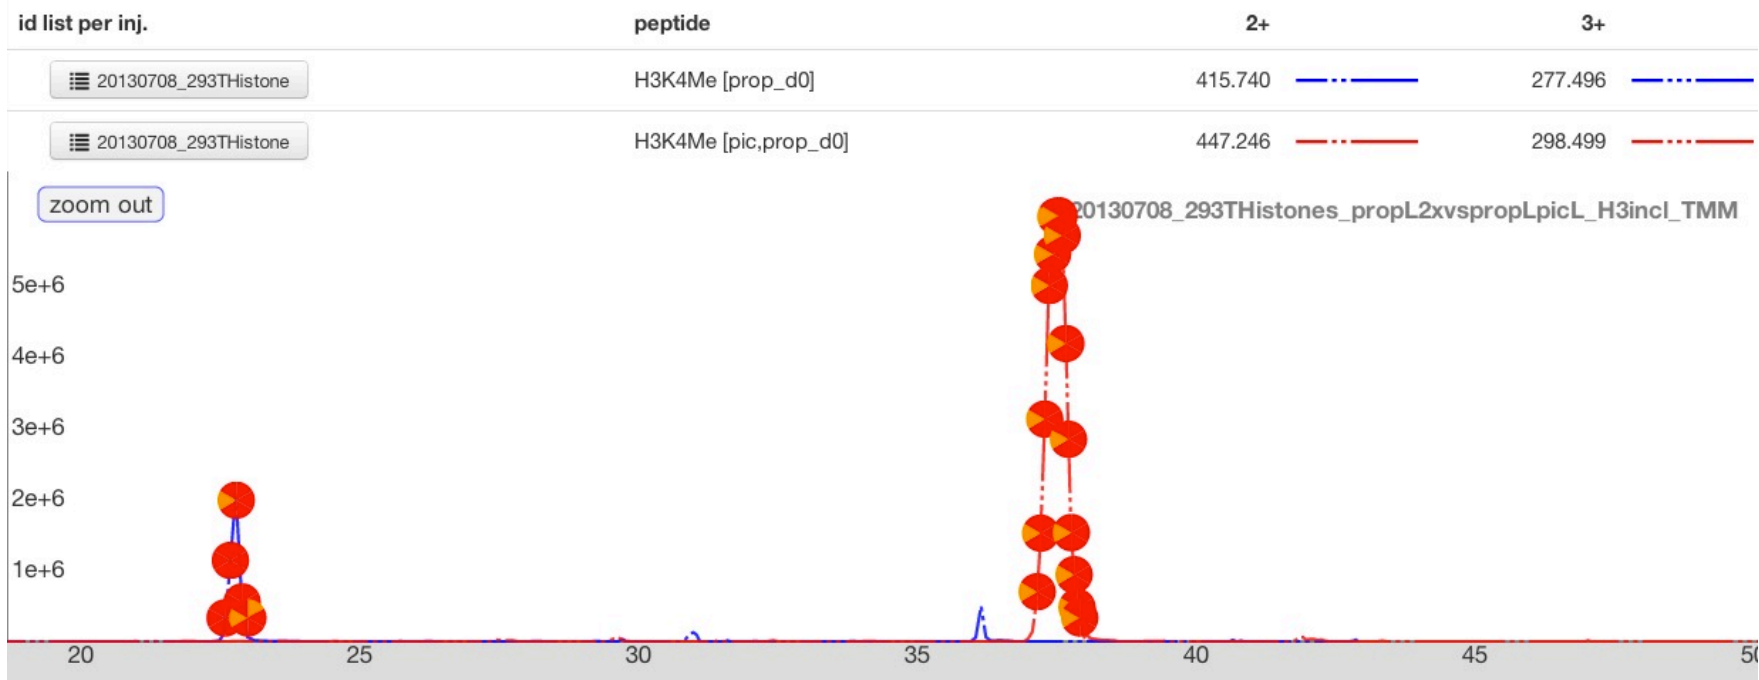



## Quanti event: 22.2-23.5min

| injection                                           | peptide              | charge | m/z      | auc    |
|-----------------------------------------------------|----------------------|--------|----------|--------|
| 20130708_293THistones_propL2xvspropLpicL_H3incl_TMM | H3K4Me [prop_d0]     | 1      | 830.4730 | 4.8e+6 |
| 20130708_293THistones_propL2xvspropLpicL_H3incl_TMM | H3K4Me [pic,prop_d0] | 1      | 893.4839 | 0.0e+0 |
| 20130708_293THistones_propL2xvspropLpicL_H3incl_TMM | H3K4Me [prop_d0]     | 2      | 415.7402 | 2.5e+7 |
| 20130708_293THistones_propL2xvspropLpicL_H3incl_TMM | H3K4Me [pic,prop_d0] | 2      | 447.2456 | 7.9e+4 |

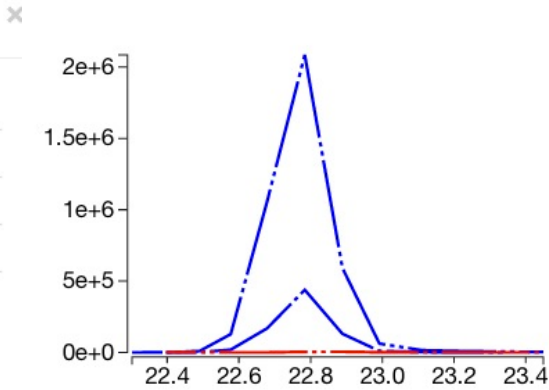

## Quanti event: 36.9-38.2min

| injection                                           | peptide              | charge | m/z      | auc    |
|-----------------------------------------------------|----------------------|--------|----------|--------|
| 20130708_293THistones_propL2xvspropLpicL_H3incl_TMM | H3K4Me [prop_d0]     | 1      | 830.4730 | 4.6e+7 |
| 20130708_293THistones_propL2xvspropLpicL_H3incl_TMM | H3K4Me [pic,prop_d0] | 1      | 893.4839 | 1.9e+8 |
| 20130708_293THistones_propL2xvspropLpicL_H3incl_TMM | H3K4Me [prop_d0]     | 2      | 415.7402 | 1.1e+4 |
| 20130708_293THistones_propL2xvspropLpicL_H3incl_TMM | H3K4Me [pic,prop_d0] | 2      | 447.2456 | 1.6e+8 |

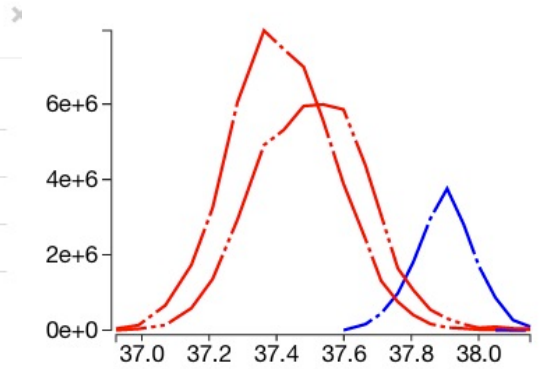

# H3\_T3-R8: Prop-TKMe1QTAR MS/MS

### Experimental spectrum

scan 2890  
 retention time 22.7min  
 precursor m/z 415.7402  
 precursor charge 2+

### Theoretical

M H<sup>2+</sup> 415.7402  
 MH Δ<sub>mass</sub> Da 0.0001  
 MH Δ<sub>mass</sub> ppm 0.1

### edit peptide

{Propionyl}TK{Methyl,Propionyl}QTAR align

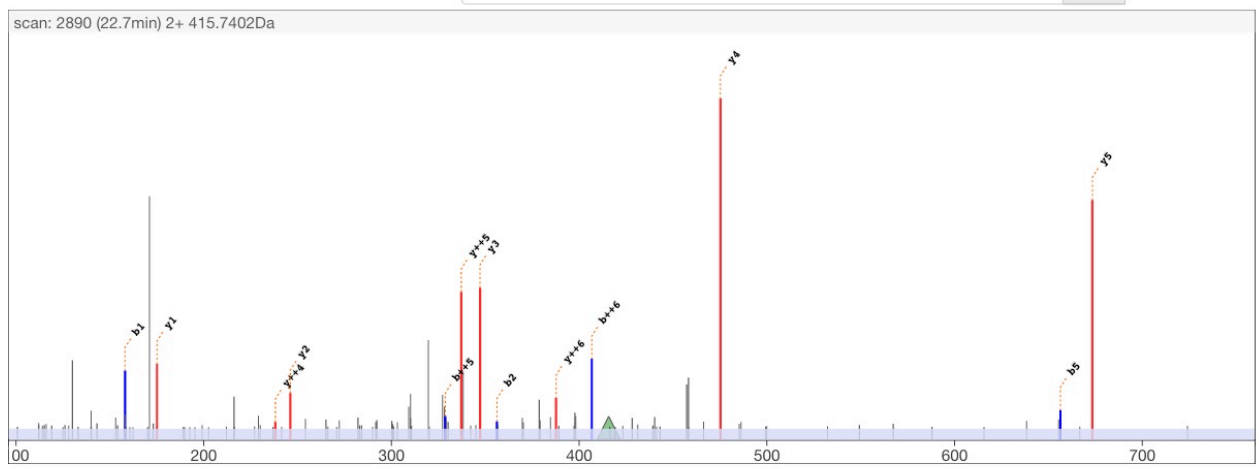

↑  
 171Da diagnostic ion

|   | b++    | b      |                  | y      | y++    |   |
|---|--------|--------|------------------|--------|--------|---|
|   |        |        | Propionyl        | 774.45 | 387.73 | 6 |
| 1 | 79.54  | 158.08 | T                | 673.40 | 337.20 | 5 |
| 2 | 178.61 | 356.22 | K                | 475.26 | 238.13 | 4 |
| 3 | 242.64 | 484.28 | Methyl,Propionyl | 347.20 | 174.11 | 3 |
| 4 | 293.17 | 585.32 | Q                | 246.16 | 123.58 | 2 |
| 5 | 328.68 | 656.36 | T                | 175.12 | 88.06  | 1 |
| 6 | 406.73 | 812.46 | A                |        |        |   |
|   |        |        | R                |        |        |   |

# H3\_T3-R8: PIC-TKMe1QTAR MS/MS

### Experimental spectrum

scan 5956  
 retention time 37.5min  
 precursor m/z 447.2446  
 precursor charge 2+

### Theoretical

M H<sup>2+</sup> 447.2456  
 MH  $\Delta_{mass}$  Da -0.0020  
 MH  $\Delta_{mass}$  ppm -2.2

### edit peptide

{PIC}TK{Methyl,Propionyl}QTAR align

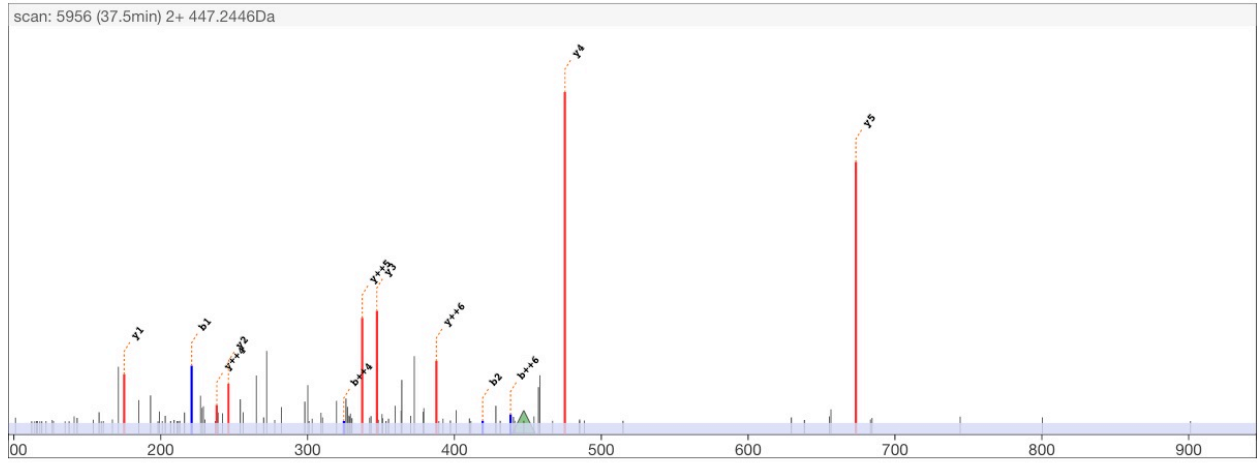

↑  
 171Da diagnostic ion

|   | b++    | b      |                                                       | y      | y++    |   |
|---|--------|--------|-------------------------------------------------------|--------|--------|---|
|   | 60.53  | 120.04 | PIC<br>T<br>K<br>Methyl,Propionyl<br>Q<br>T<br>A<br>R | 774.45 | 387.73 | 6 |
| 1 | 111.05 | 221.09 |                                                       | 673.40 | 337.20 | 5 |
| 2 | 210.12 | 419.23 |                                                       | 475.26 | 238.13 | 4 |
| 3 | 274.15 | 547.29 |                                                       | 347.20 | 174.11 | 3 |
| 4 | 324.67 | 648.34 |                                                       | 246.16 | 123.58 | 2 |
| 5 | 360.19 | 719.37 |                                                       | 175.12 | 88.06  | 1 |
| 6 | 438.24 | 875.47 |                                                       |        |        |   |

# H3\_T3-R8:

## TKMe1QTPropAR

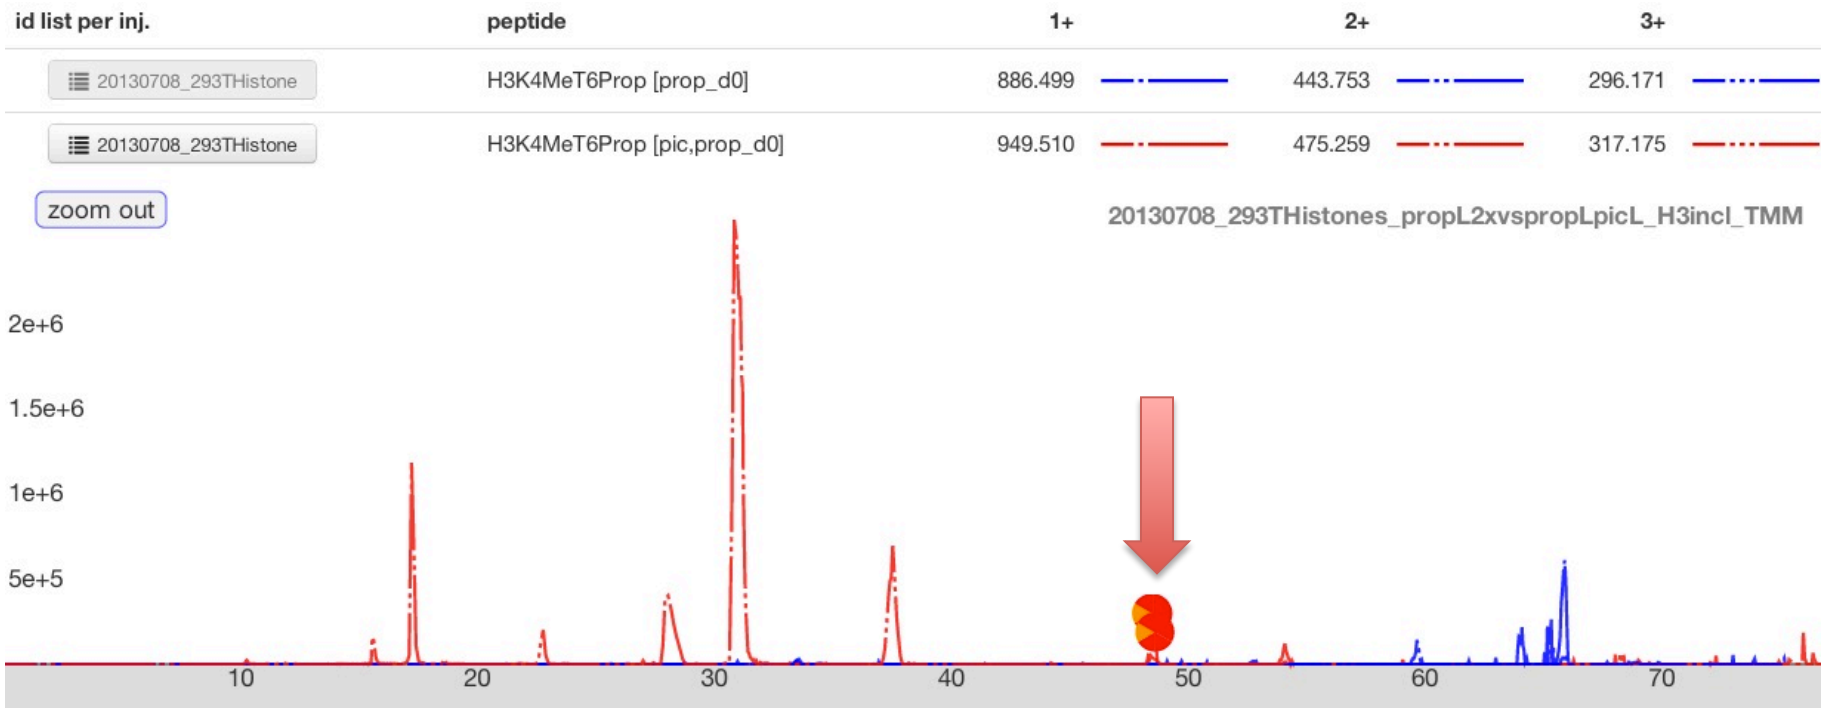

### Quanti event: 48.0-48.9min

| injection                                           | peptide                    | charge | m/z      | auc    |
|-----------------------------------------------------|----------------------------|--------|----------|--------|
| 20130708_293THistones_propL2xvspropLpicL_H3incl_TMM | H3K4MeT6Prop [prop_d0]     | 1      | 886.4993 | 0.0e+0 |
| 20130708_293THistones_propL2xvspropLpicL_H3incl_TMM | H3K4MeT6Prop [pic,prop_d0] | 1      | 949.5102 | 6.9e+5 |
| 20130708_293THistones_propL2xvspropLpicL_H3incl_TMM | H3K4MeT6Prop [prop_d0]     | 2      | 443.7533 | 0.0e+0 |
| 20130708_293THistones_propL2xvspropLpicL_H3incl_TMM | H3K4MeT6Prop [pic,prop_d0] | 2      | 475.2587 | 4.7e+6 |
| 20130708_293THistones_propL2xvspropLpicL_H3incl_TMM | H3K4MeT6Prop [prop_d0]     | 3      | 296.1713 | 0.0e+0 |
| 20130708_293THistones_propL2xvspropLpicL_H3incl_TMM | H3K4MeT6Prop [pic,prop_d0] | 3      | 317.1749 | 0.0e+0 |

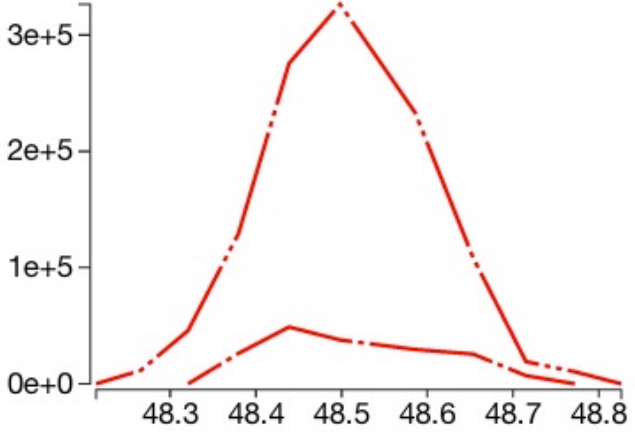

No peaks detected for Prop-labeling.

**Experimental spectrum**

scan 9225  
 retention time 48.5min  
 precursor m/z 475.2589  
 precursor charge 2+

**Theoretical**

M H<sup>2+</sup> 475.2587  
 MH Δ<sub>mass</sub> Da 0.0003  
 MH Δ<sub>mass</sub> ppm 0.3

**edit peptide**

{PIC}TK[Methyl,Propionyl]QT[Propionyl]AR align

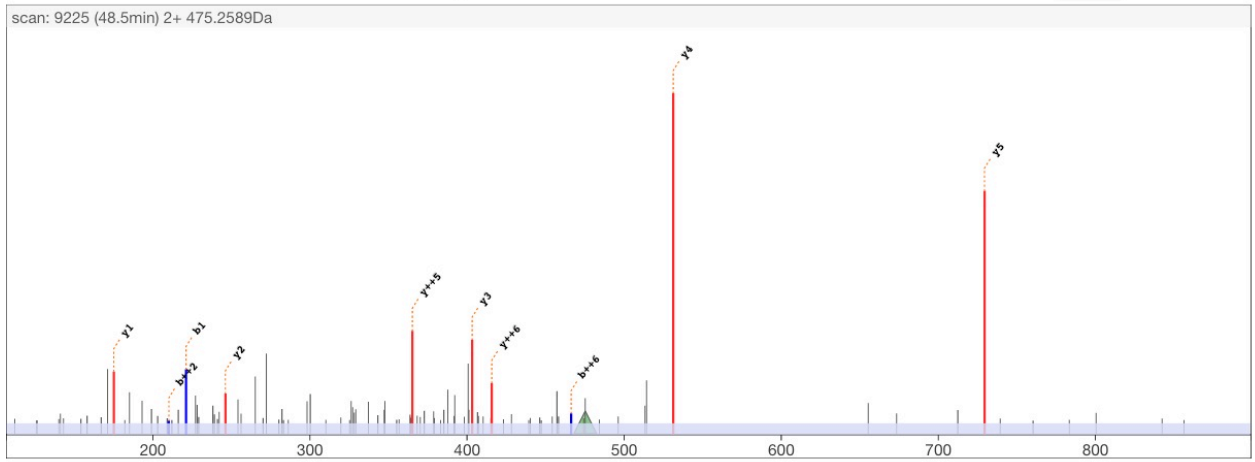

↑  
 171Da diagnostic ion

|   | b++    | b      |     | y      | y++    |   |
|---|--------|--------|-----|--------|--------|---|
|   | 60.53  | 120.04 | PIC | 830.47 | 415.74 | 6 |
| 1 | 111.05 | 221.09 | T   | 729.43 | 365.22 | 5 |
| 2 | 210.12 | 419.23 | K   | 531.29 | 266.15 | 4 |
| 3 | 274.15 | 547.29 | Q   | 403.23 | 202.12 | 3 |
| 4 | 352.68 | 704.36 | T   | 246.16 | 123.58 | 2 |
| 5 | 388.20 | 775.40 | A   | 175.12 | 88.06  | 1 |
| 6 | 466.25 | 931.50 | R   |        |        |   |

# H3\_T3-R8: TKMe2QTAR

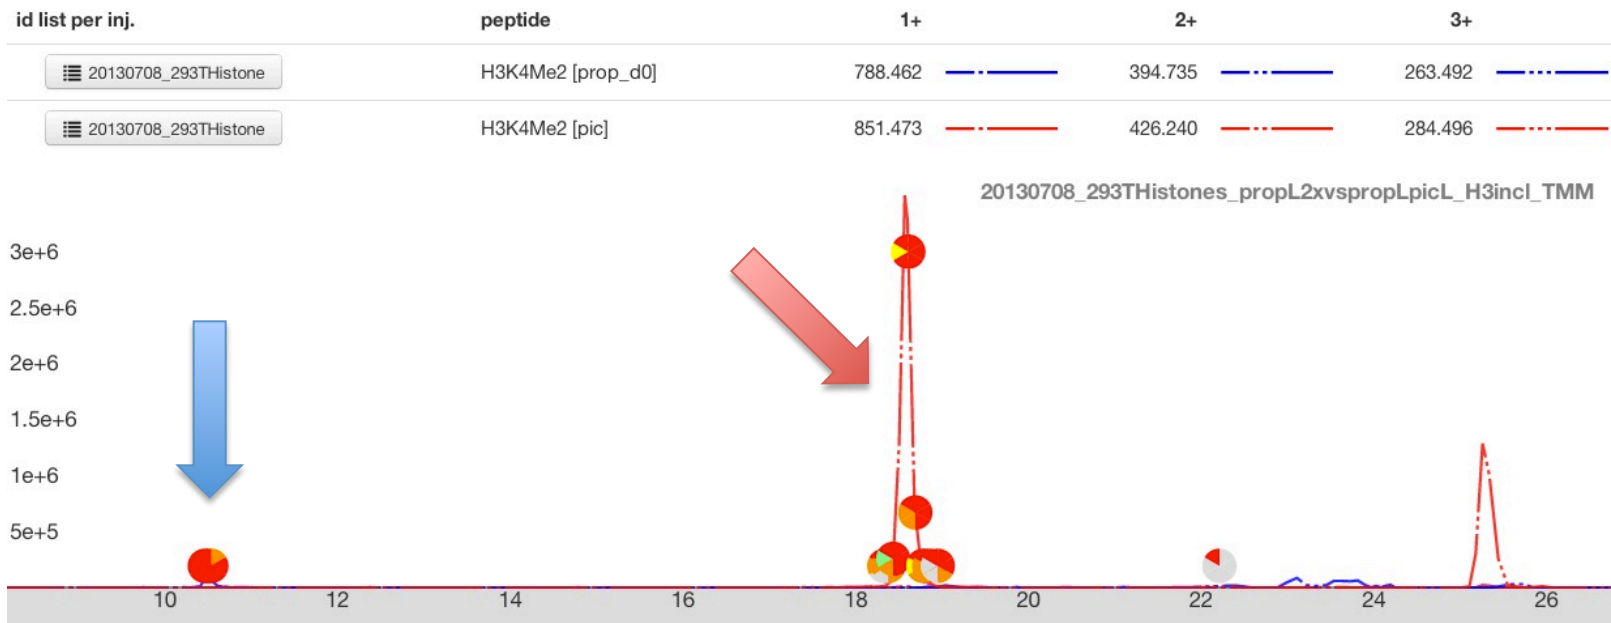

## Quanti event: 10.1-11.1min

| injection                                           | peptide           | charge | m/z      | auc    |
|-----------------------------------------------------|-------------------|--------|----------|--------|
| 20130708_293THistones_propL2xvspropLpicL_H3incl_TMM | H3K4Me2 [prop_d0] | 1      | 788.4625 | 9.6e+2 |
| 20130708_293THistones_propL2xvspropLpicL_H3incl_TMM | H3K4Me2 [pic]     | 1      | 851.4734 | 0.0e+0 |
| 20130708_293THistones_propL2xvspropLpicL_H3incl_TMM | H3K4Me2 [prop_d0] | 2      | 394.7349 | 2.9e+5 |
| 20130708_293THistones_propL2xvspropLpicL_H3incl_TMM | H3K4Me2 [pic]     | 2      | 426.2403 | 0.0e+0 |
| 20130708_293THistones_propL2xvspropLpicL_H3incl_TMM | H3K4Me2 [prop_d0] | 3      | 263.4923 | 0.0e+0 |
| 20130708_293THistones_propL2xvspropLpicL_H3incl_TMM | H3K4Me2 [pic]     | 3      | 284.4960 | 0.0e+0 |

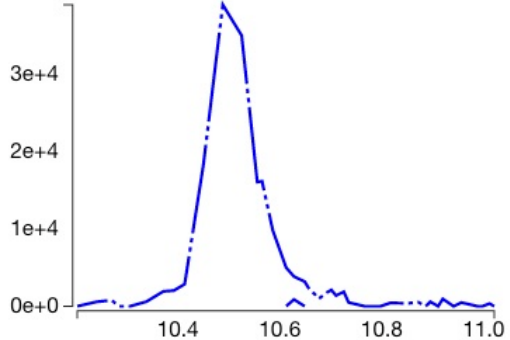

## Quanti event: 17.5-19.7min

| injection                                           | peptide           | charge | m/z      | auc    |
|-----------------------------------------------------|-------------------|--------|----------|--------|
| 20130708_293THistones_propL2xvspropLpicL_H3incl_TMM | H3K4Me2 [prop_d0] | 1      | 788.4625 | 0.0e+0 |
| 20130708_293THistones_propL2xvspropLpicL_H3incl_TMM | H3K4Me2 [pic]     | 1      | 851.4734 | 2.7e+4 |
| 20130708_293THistones_propL2xvspropLpicL_H3incl_TMM | H3K4Me2 [prop_d0] | 2      | 394.7349 | 6.2e+4 |
| 20130708_293THistones_propL2xvspropLpicL_H3incl_TMM | H3K4Me2 [pic]     | 2      | 426.2403 | 1.0e+7 |
| 20130708_293THistones_propL2xvspropLpicL_H3incl_TMM | H3K4Me2 [prop_d0] | 3      | 263.4923 | 0.0e+0 |
| 20130708_293THistones_propL2xvspropLpicL_H3incl_TMM | H3K4Me2 [pic]     | 3      | 284.4960 | 0.0e+0 |

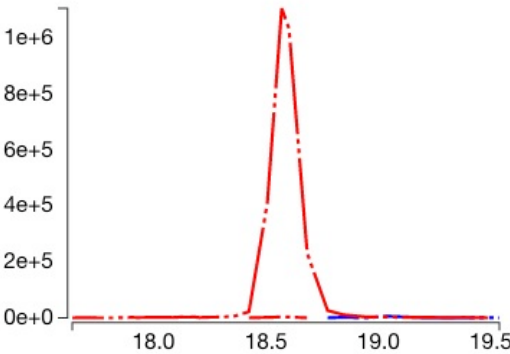



### Experimental spectrum

scan 1280  
 retention time 10.5min  
 precursor m/z 394.7345  
 precursor charge 2+

### Theoretical

M H<sup>2+</sup> 394.7349  
 MH  $\Delta_{mass}$  Da -0.0008  
 MH  $\Delta_{mass}$  ppm -1.0

### edit peptide

{Propionyl}TK{Dimethyl}QTAR

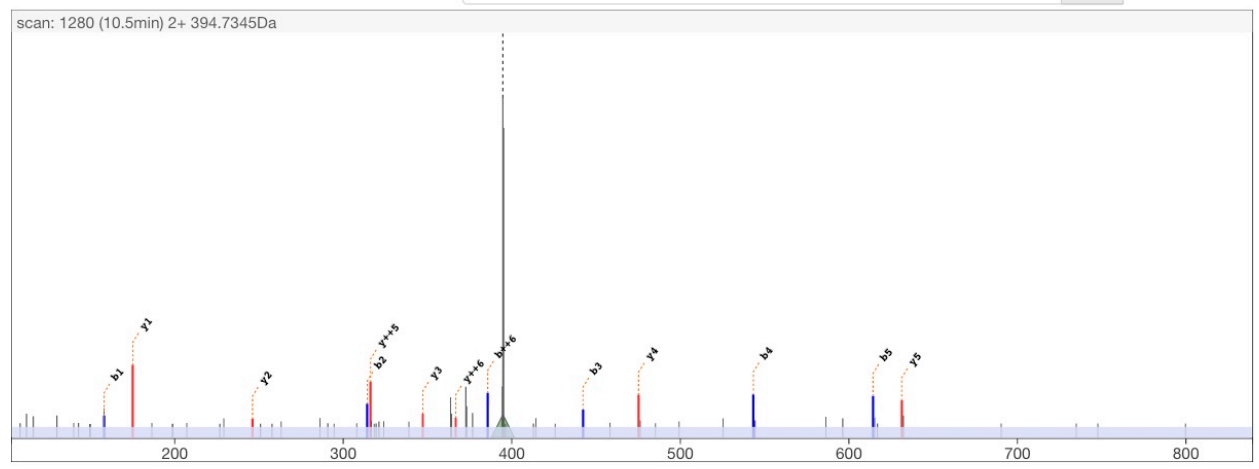

|   | b++    | b      |            | y      | y++    |   |
|---|--------|--------|------------|--------|--------|---|
|   |        |        | Propionyl  | 732.44 | 366.72 | 6 |
| 1 | 79.54  | 158.08 | T          | 631.39 | 316.20 | 5 |
| 2 | 157.61 | 314.21 | K          | 475.26 | 238.13 | 4 |
| 3 | 221.64 | 442.27 | Dimethyl Q | 347.20 | 174.11 | 3 |
| 4 | 272.16 | 543.31 | T          | 246.16 | 123.58 | 2 |
| 5 | 307.68 | 614.35 | A          | 175.12 | 88.06  | 1 |
| 6 | 385.73 | 770.45 | R          |        |        |   |

### Experimental spectrum

scan 2300  
 retention time 18.6min  
 precursor m/z 426.2403  
 precursor charge 2+

### Theoretical

M H<sup>2+</sup> 426.2403  
 MH  $\Delta_{mass}$  Da -0.0001  
 MH  $\Delta_{mass}$  ppm -0.1

### edit peptide

{PIC}TK{Dimethyl}QTAR align

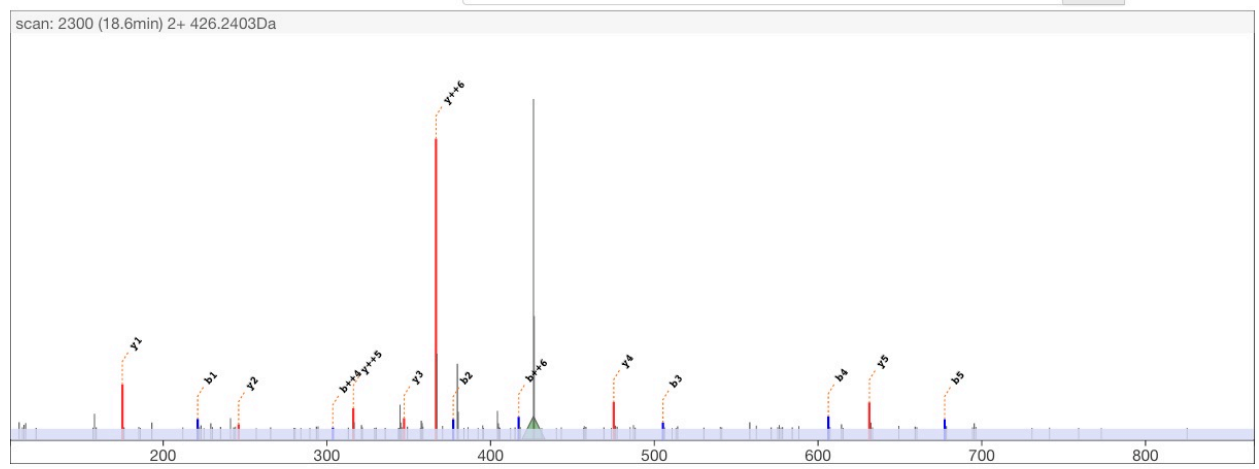

|   | b++    | b      |          | y      | y++    |   |
|---|--------|--------|----------|--------|--------|---|
|   | 60.53  | 120.04 | PIC      | 732.44 | 366.72 | 6 |
| 1 | 111.05 | 221.09 | T        | 631.39 | 316.20 | 5 |
| 2 | 189.11 | 377.22 | K        | 475.26 | 238.13 | 4 |
| 3 | 253.14 | 505.28 | Dimethyl | 347.20 | 174.11 | 3 |
| 4 | 303.67 | 606.32 | Q        | 246.16 | 123.58 | 2 |
| 5 | 339.18 | 677.36 | T        | 175.12 | 88.06  | 1 |
| 6 | 417.24 | 833.46 | A        |        |        |   |
|   |        |        | R        |        |        |   |

# H3\_T3-R8: TKMe3QTAR

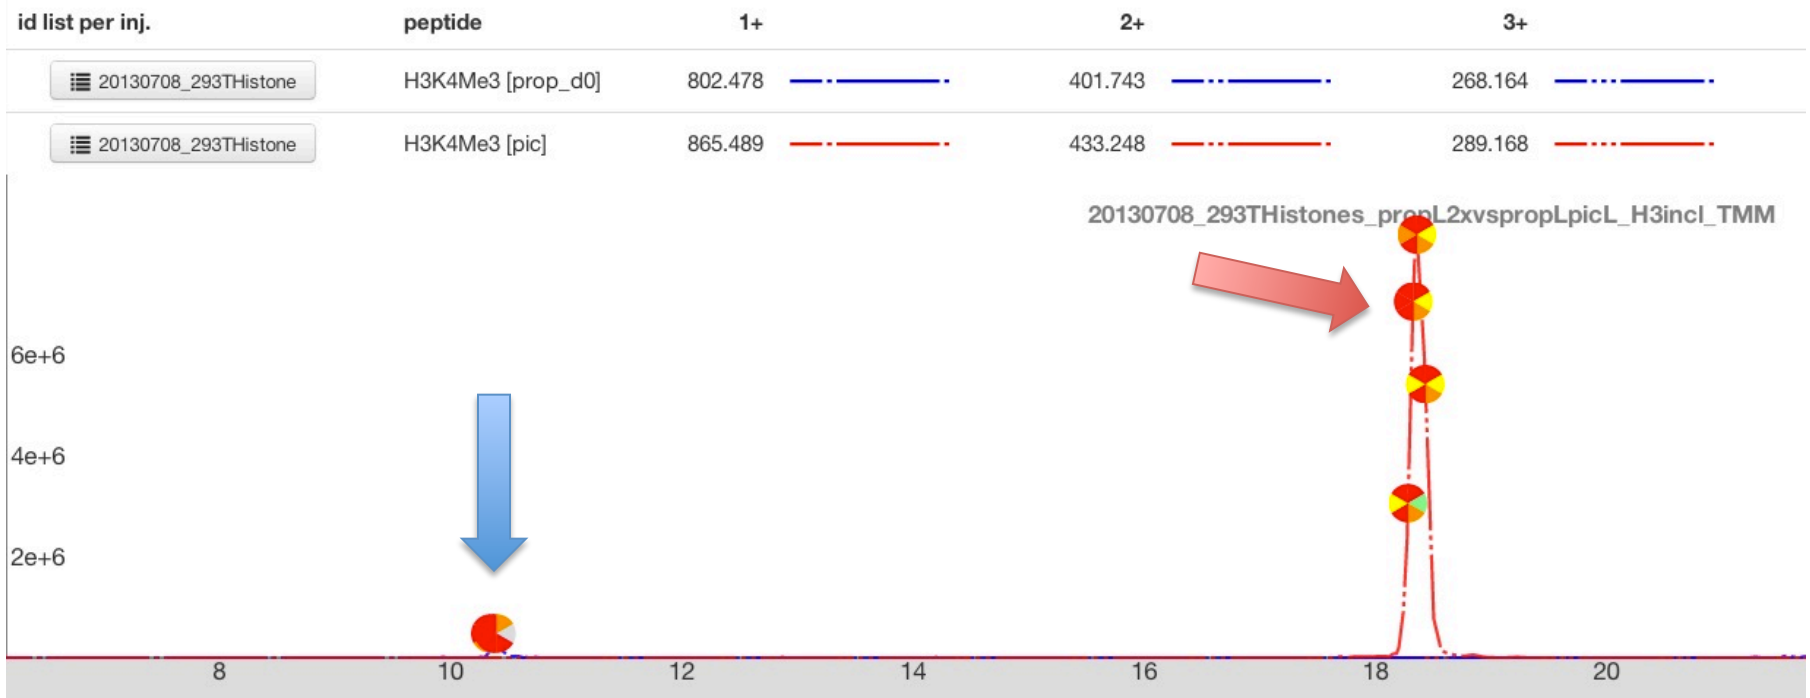

## Quanti event: 9.9-10.9min

| injection                                           | peptide           | charge | m/z      | auc    |
|-----------------------------------------------------|-------------------|--------|----------|--------|
| 20130708_293THistones_propL2xvspropLpicL_H3incl_TMM | H3K4Me3 [prop_d0] | 1      | 802.4781 | 0.0e+0 |
| 20130708_293THistones_propL2xvspropLpicL_H3incl_TMM | H3K4Me3 [pic]     | 1      | 865.4890 | 0.0e+0 |
| 20130708_293THistones_propL2xvspropLpicL_H3incl_TMM | H3K4Me3 [prop_d0] | 2      | 401.7427 | 1.0e+5 |
| 20130708_293THistones_propL2xvspropLpicL_H3incl_TMM | H3K4Me3 [pic]     | 2      | 433.2482 | 0.0e+0 |
| 20130708_293THistones_propL2xvspropLpicL_H3incl_TMM | H3K4Me3 [prop_d0] | 3      | 268.1642 | 0.0e+0 |
| 20130708_293THistones_propL2xvspropLpicL_H3incl_TMM | H3K4Me3 [pic]     | 3      | 289.1679 | 0.0e+0 |

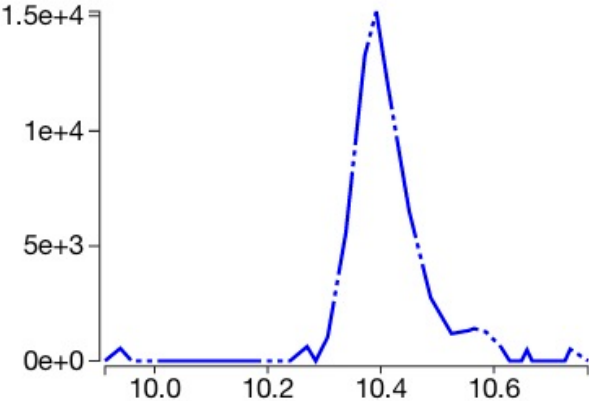

## Quanti event: 17.9-19.1min

| injection                                           | peptide           | charge | m/z      | auc    |
|-----------------------------------------------------|-------------------|--------|----------|--------|
| 20130708_293THistones_propL2xvspropLpicL_H3incl_TMM | H3K4Me3 [prop_d0] | 1      | 802.4781 | 0.0e+0 |
| 20130708_293THistones_propL2xvspropLpicL_H3incl_TMM | H3K4Me3 [pic]     | 1      | 865.4890 | 0.0e+0 |
| 20130708_293THistones_propL2xvspropLpicL_H3incl_TMM | H3K4Me3 [prop_d0] | 2      | 401.7427 | 0.0e+0 |
| 20130708_293THistones_propL2xvspropLpicL_H3incl_TMM | H3K4Me3 [pic]     | 2      | 433.2482 | 3.9e+6 |
| 20130708_293THistones_propL2xvspropLpicL_H3incl_TMM | H3K4Me3 [prop_d0] | 3      | 268.1642 | 0.0e+0 |
| 20130708_293THistones_propL2xvspropLpicL_H3incl_TMM | H3K4Me3 [pic]     | 3      | 289.1679 | 0.0e+0 |

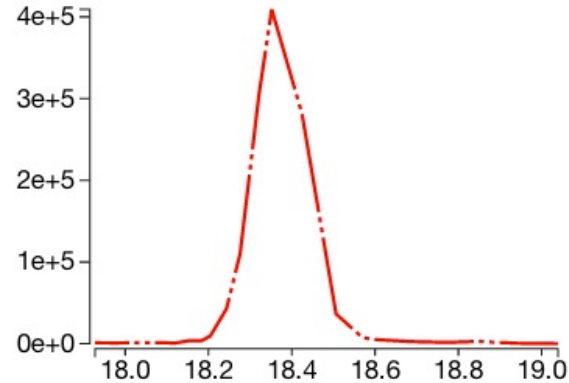

### Experimental spectrum

scan 1271  
 retention time 10.4min  
 precursor m/z 401.7427  
 precursor charge 2+

### Theoretical

M H<sup>2+</sup> 401.7427  
 MH  $\Delta_{mass}$  Da 0.0000  
 MH  $\Delta_{mass}$  ppm 0.0

### edit peptide

{Propionyl}TK{Trimethyl}QTAR

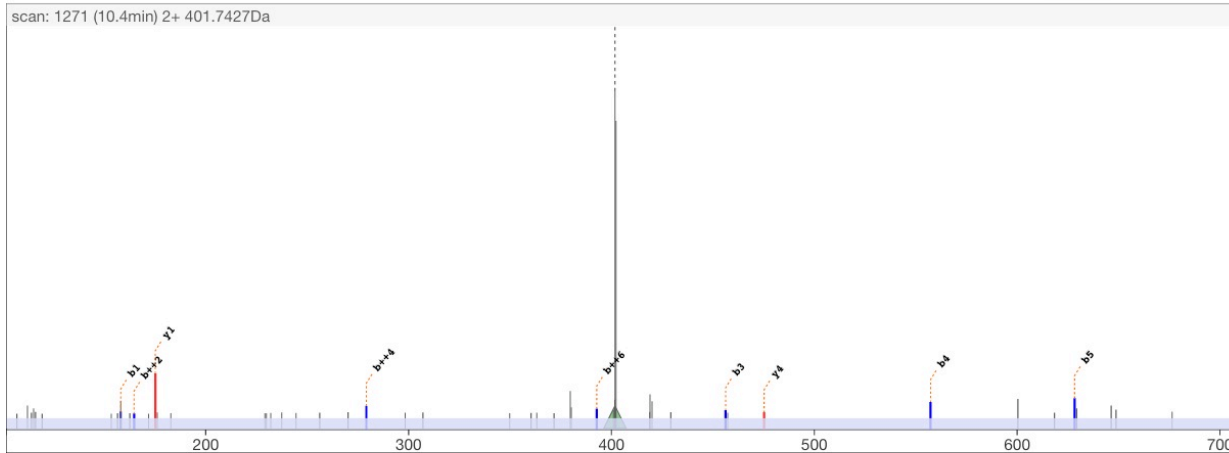

|   | b++    | b      |           | y      | y++    |   |
|---|--------|--------|-----------|--------|--------|---|
|   |        |        | Propionyl | 746.45 | 373.73 | 6 |
| 1 | 79.54  | 158.08 | T         | 645.40 | 323.21 | 5 |
| 2 | 164.62 | 328.22 | K         | 475.26 | 238.13 | 4 |
| 3 | 228.64 | 456.28 | Trimethyl | 347.20 | 174.11 | 3 |
| 4 | 279.17 | 557.33 | Q         | 246.16 | 123.58 | 2 |
| 5 | 314.69 | 628.37 | T         | 175.12 | 88.06  | 1 |
| 6 | 392.74 | 784.47 | A         |        |        |   |
|   |        |        | R         |        |        |   |

### Experimental spectrum

scan 2258  
 retention time 18.4min  
 precursor m/z 433.2478  
 precursor charge 2+

### Theoretical

M H<sup>2+</sup> 433.2482  
 MH Δ<sub>mass</sub> Da -0.0007  
 MH Δ<sub>mass</sub> ppm -0.8

### edit peptide

{PIC}TK(Trimethyl)QTAR align

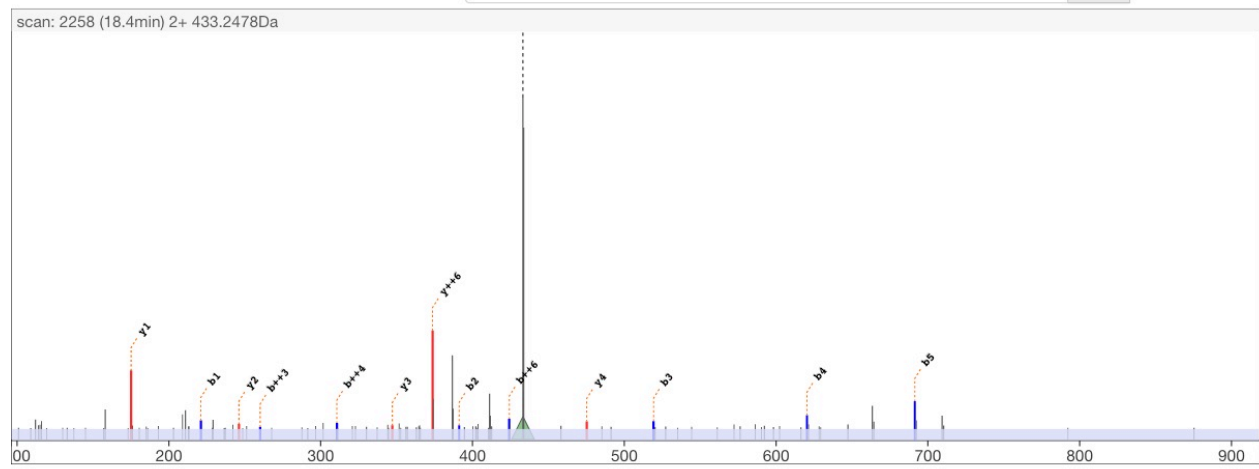

|   | b++    | b      |     | y      | y++    |   |
|---|--------|--------|-----|--------|--------|---|
|   | 60.53  | 120.04 | PIC | 746.45 | 373.73 | 6 |
| 1 | 111.05 | 221.09 | T   | 645.40 | 323.21 | 5 |
| 2 | 196.12 | 391.23 | K   | 475.26 | 238.13 | 4 |
| 3 | 260.15 | 519.29 | Q   | 347.20 | 174.11 | 3 |
| 4 | 310.67 | 620.34 | T   | 246.16 | 123.58 | 2 |
| 5 | 346.19 | 691.38 | A   | 175.12 | 88.06  | 1 |
| 6 | 424.24 | 847.48 | R   |        |        |   |

# H3\_T3-R8: TKAcQTAR

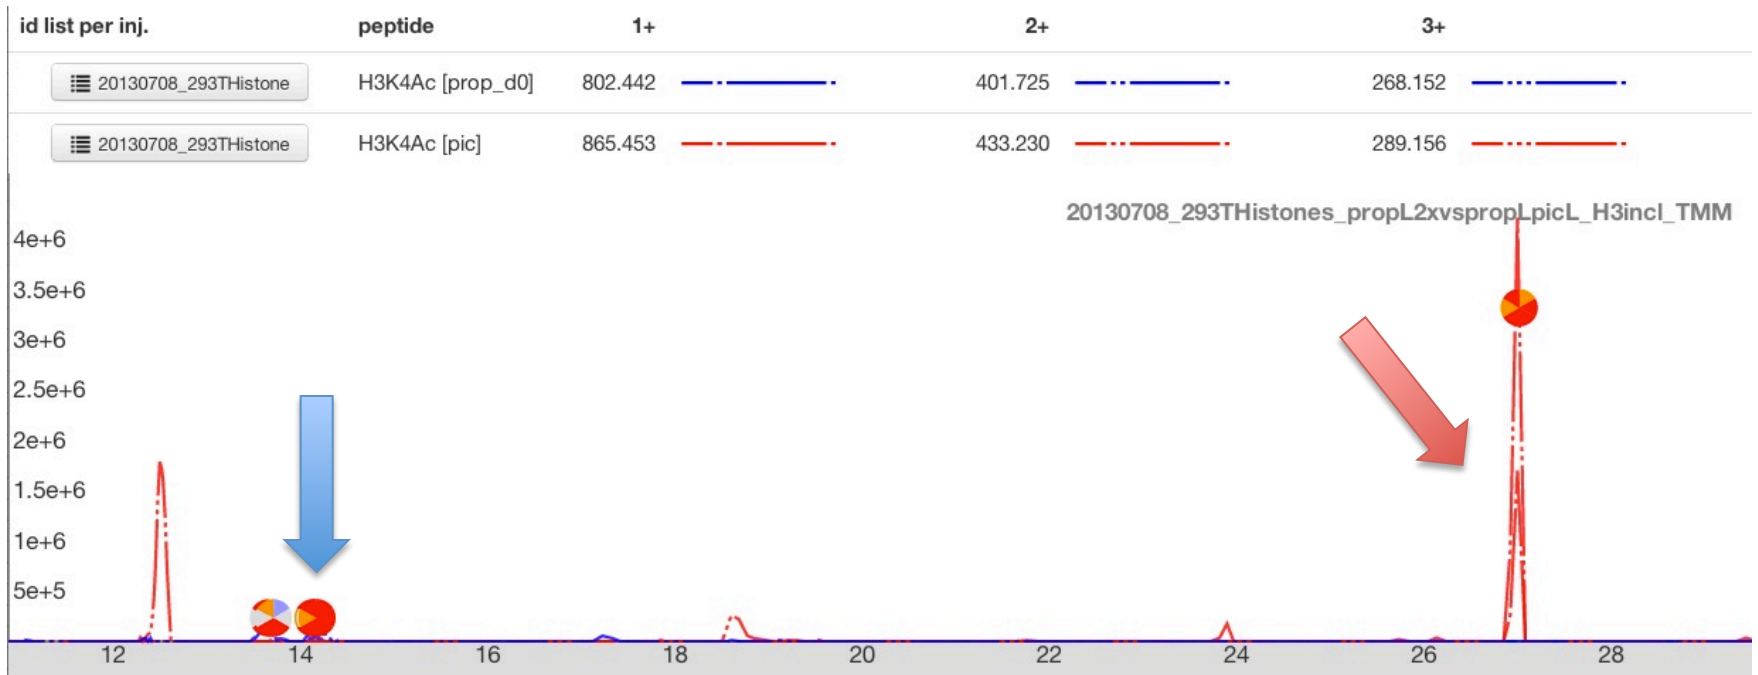

## Quanti event: 14.0-14.5min

| injection                                           | peptide          | charge | m/z      | auc    |
|-----------------------------------------------------|------------------|--------|----------|--------|
| 20130708_293THistones_propL2xvspropLpicL_H3incl_TMM | H3K4Ac [prop_d0] | 1      | 802.4417 | 1.2e+4 |
| 20130708_293THistones_propL2xvspropLpicL_H3incl_TMM | H3K4Ac [pic]     | 1      | 865.4526 | 0.0e+0 |
| 20130708_293THistones_propL2xvspropLpicL_H3incl_TMM | H3K4Ac [prop_d0] | 2      | 401.7245 | 8.8e+4 |
| 20130708_293THistones_propL2xvspropLpicL_H3incl_TMM | H3K4Ac [pic]     | 2      | 433.2300 | 0.0e+0 |
| 20130708_293THistones_propL2xvspropLpicL_H3incl_TMM | H3K4Ac [prop_d0] | 3      | 268.1521 | 0.0e+0 |
| 20130708_293THistones_propL2xvspropLpicL_H3incl_TMM | H3K4Ac [pic]     | 3      | 289.1557 | 0.0e+0 |

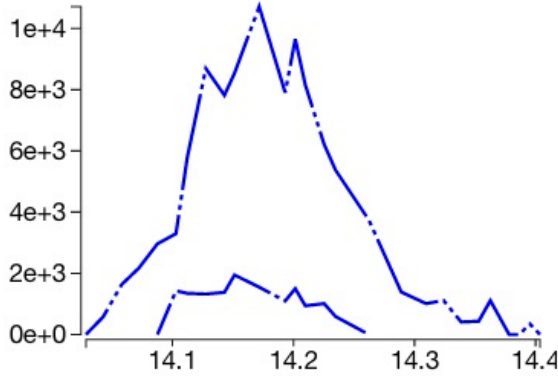

## Quanti event: 26.6-27.3min

| injection                                           | peptide          | charge | m/z      | auc    |
|-----------------------------------------------------|------------------|--------|----------|--------|
| 20130708_293THistones_propL2xvspropLpicL_H3incl_TMM | H3K4Ac [prop_d0] | 1      | 802.4417 | 0.0e+0 |
| 20130708_293THistones_propL2xvspropLpicL_H3incl_TMM | H3K4Ac [pic]     | 1      | 865.4526 | 4.2e+5 |
| 20130708_293THistones_propL2xvspropLpicL_H3incl_TMM | H3K4Ac [prop_d0] | 2      | 401.7245 | 0.0e+0 |
| 20130708_293THistones_propL2xvspropLpicL_H3incl_TMM | H3K4Ac [pic]     | 2      | 433.2300 | 1.1e+6 |
| 20130708_293THistones_propL2xvspropLpicL_H3incl_TMM | H3K4Ac [prop_d0] | 3      | 268.1521 | 0.0e+0 |
| 20130708_293THistones_propL2xvspropLpicL_H3incl_TMM | H3K4Ac [pic]     | 3      | 289.1557 | 0.0e+0 |

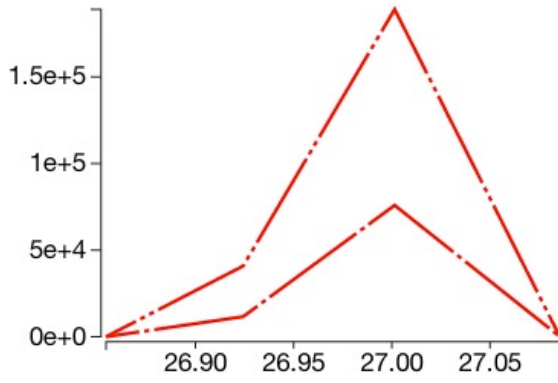



# H3\_T3-R8: Prop-TKAcQTAR MS/MS

### Experimental spectrum

scan 1711  
 retention time 14.2min  
 precursor m/z 401.7243  
 precursor charge 2+

### Theoretical

MH<sup>2+</sup> 401.7245  
 MH Δ<sub>mass</sub> Da -0.0005  
 MH Δ<sub>mass</sub> ppm -0.6

### edit peptide

{Propionyl}TK{Acetyl}QTAR align

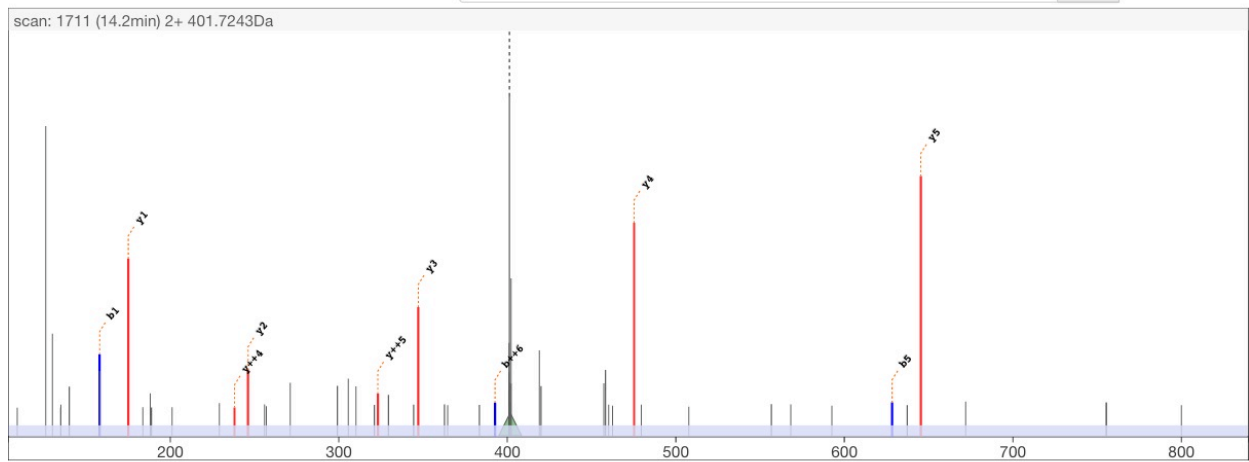

↑  
 126Da diagnostic ion

|   | b++    | b      |           | y      | y++    |   |
|---|--------|--------|-----------|--------|--------|---|
|   |        |        | Propionyl | 746.42 | 373.71 | 6 |
| 1 | 79.54  | 158.08 | T         | 645.37 | 323.19 | 5 |
| 2 | 164.60 | 328.19 | K         | 475.26 | 238.13 | 4 |
| 3 | 228.63 | 456.25 | Acetyl    | 347.20 | 174.11 | 3 |
| 4 | 279.15 | 557.29 | T         | 246.16 | 123.58 | 2 |
| 5 | 314.67 | 628.33 | A         | 175.12 | 88.06  | 1 |
| 6 | 392.72 | 784.43 | R         |        |        |   |

# H3\_T3-R8: PIC-TKAcQTAR MS/MS

### Experimental spectrum

scan 3706  
 retention time 27.0min  
 precursor m/z 433.2293  
 precursor charge 2+

### Theoretical

M H<sup>2+</sup> 433.2300  
 MH Δ<sub>mass</sub> Da -0.0012  
 MH Δ<sub>mass</sub> ppm -1.4

### edit peptide

{PIC}TK{Acetyl}QTAR

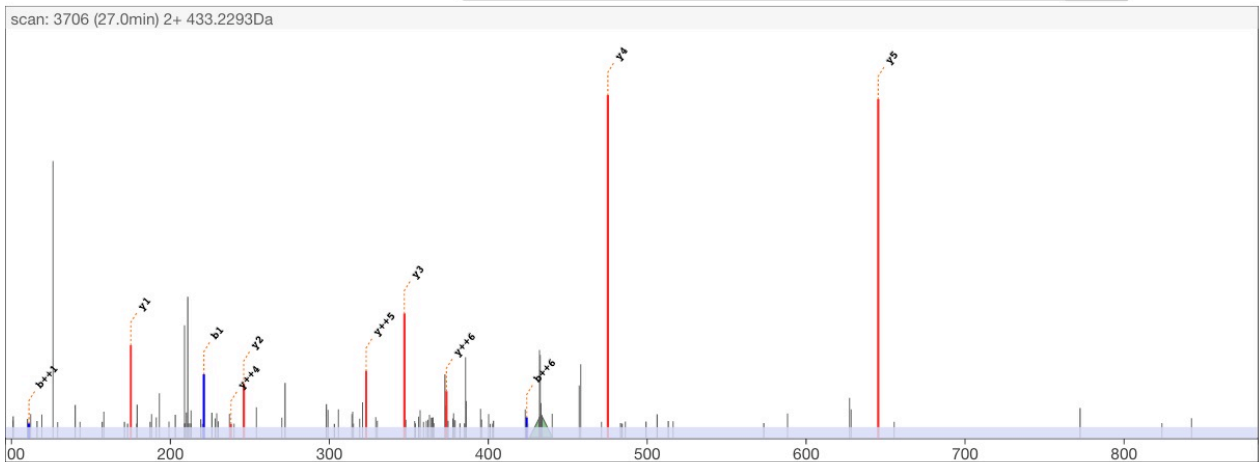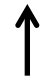

126Da diagnostic ion

|   | b++    | b      |        | y      | y++    |   |
|---|--------|--------|--------|--------|--------|---|
|   | 60.53  | 120.04 | PIC    | 746.42 | 373.71 | 6 |
| 1 | 111.05 | 221.09 | T      | 645.37 | 323.19 | 5 |
| 2 | 196.10 | 391.20 | K      | 475.26 | 238.13 | 4 |
| 3 | 260.13 | 519.26 | Acetyl | 347.20 | 174.11 | 3 |
| 4 | 310.66 | 620.30 | Q      | 246.16 | 123.58 | 2 |
| 5 | 346.17 | 691.34 | T      | 175.12 | 88.06  | 1 |
| 6 | 424.22 | 847.44 | A      |        |        |   |
|   |        |        | R      |        |        |   |
