# Supplementary material
Source: PubMed Central journal article supplement (PMC4390259)
Supplement: supp_O114.046573_mcp.O114.046573-3.pdf [file supp_O114.046573_mcp.O114.046573-3.pdf]

**H3\_K9-R17**

**KSTGGKAPR**

# H3\_K9-R17: KSTGGKAPR

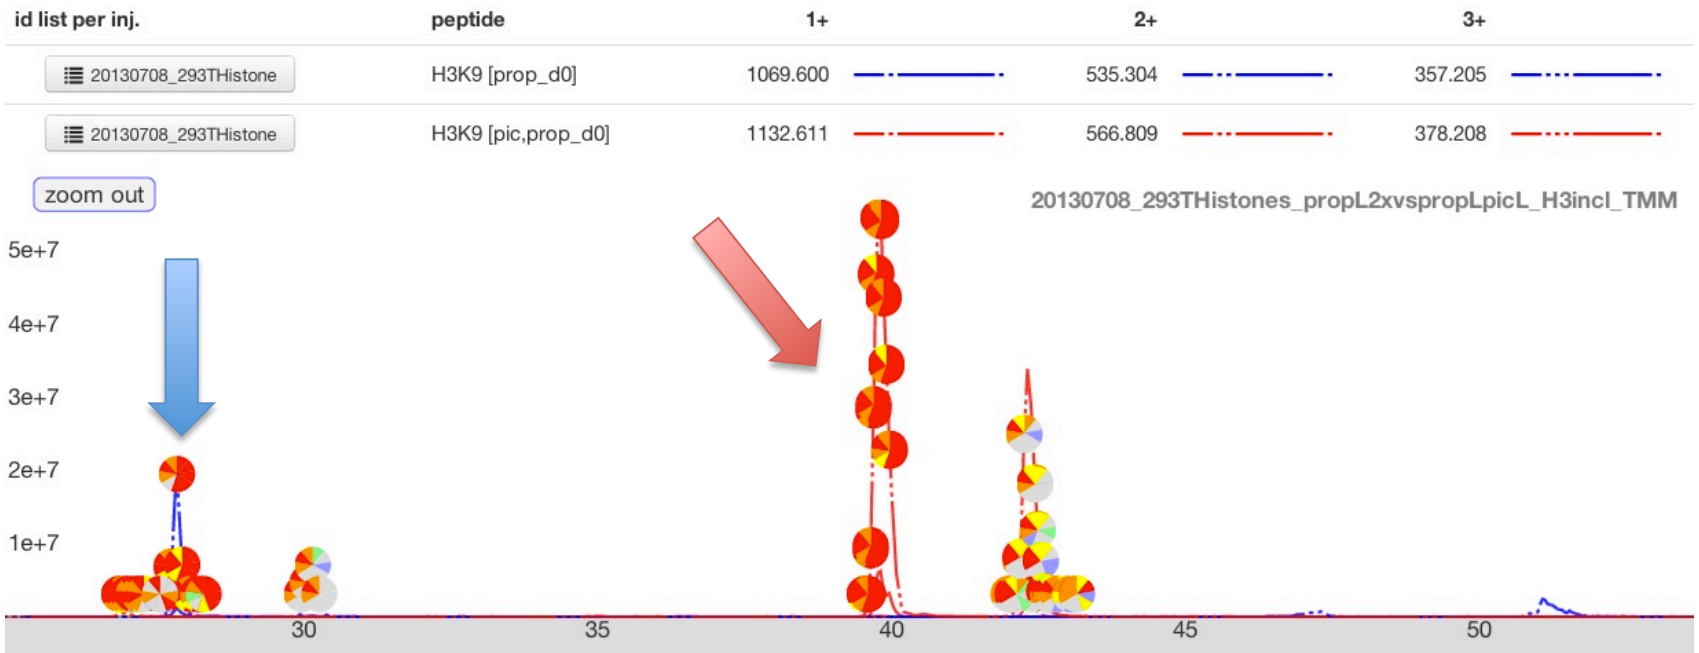

## Quanti event: 27.6-28.3min

| injection                                           | peptide            | charge | m/z       | auc    |
|-----------------------------------------------------|--------------------|--------|-----------|--------|
| 20130708_293THistones_propL2xvspropLpicL_H3incl_TMM | H3K9 [prop_d0]     | 1      | 1069.6000 | 1.1e+7 |
| 20130708_293THistones_propL2xvspropLpicL_H3incl_TMM | H3K9 [pic,prop_d0] | 1      | 1132.6109 | 0.0e+0 |
| 20130708_293THistones_propL2xvspropLpicL_H3incl_TMM | H3K9 [prop_d0]     | 2      | 535.3037  | 2.0e+8 |
| 20130708_293THistones_propL2xvspropLpicL_H3incl_TMM | H3K9 [pic,prop_d0] | 2      | 566.8091  | 1.4e+5 |
| 20130708_293THistones_propL2xvspropLpicL_H3incl_TMM | H3K9 [prop_d0]     | 3      | 357.2049  | 0.0e+0 |
| 20130708_293THistones_propL2xvspropLpicL_H3incl_TMM | H3K9 [pic,prop_d0] | 3      | 378.2085  | 6.3e+4 |

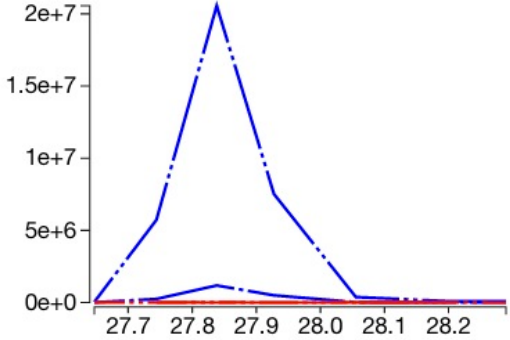

## Quanti event: 39.1-40.5min

| injection                                           | peptide            | charge | m/z       | auc    |
|-----------------------------------------------------|--------------------|--------|-----------|--------|
| 20130708_293THistones_propL2xvspropLpicL_H3incl_TMM | H3K9 [prop_d0]     | 1      | 1069.6000 | 0.0e+0 |
| 20130708_293THistones_propL2xvspropLpicL_H3incl_TMM | H3K9 [pic,prop_d0] | 1      | 1132.6109 | 8.8e+7 |
| 20130708_293THistones_propL2xvspropLpicL_H3incl_TMM | H3K9 [prop_d0]     | 2      | 535.3037  | 6.5e+4 |
| 20130708_293THistones_propL2xvspropLpicL_H3incl_TMM | H3K9 [pic,prop_d0] | 2      | 566.8091  | 9.0e+8 |
| 20130708_293THistones_propL2xvspropLpicL_H3incl_TMM | H3K9 [prop_d0]     | 3      | 357.2049  | 0.0e+0 |
| 20130708_293THistones_propL2xvspropLpicL_H3incl_TMM | H3K9 [pic,prop_d0] | 3      | 378.2085  | 9.4e+5 |

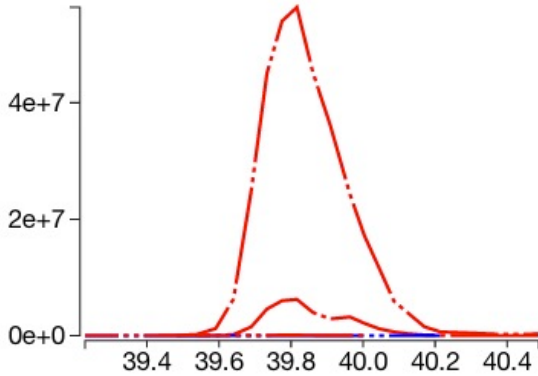

### Experimental spectrum

scan 3827  
 retention time 27.8min  
 precursor m/z 535.3032  
 precursor charge 2+

### Theoretical

M H<sup>2+</sup> 535.3037  
 MH Δ<sub>mass</sub> Da -0.0010  
 MH Δ<sub>mass</sub> ppm -0.9

### edit peptide

{Propionyl}K{Propionyl}STGGK{Propionyl}APR align

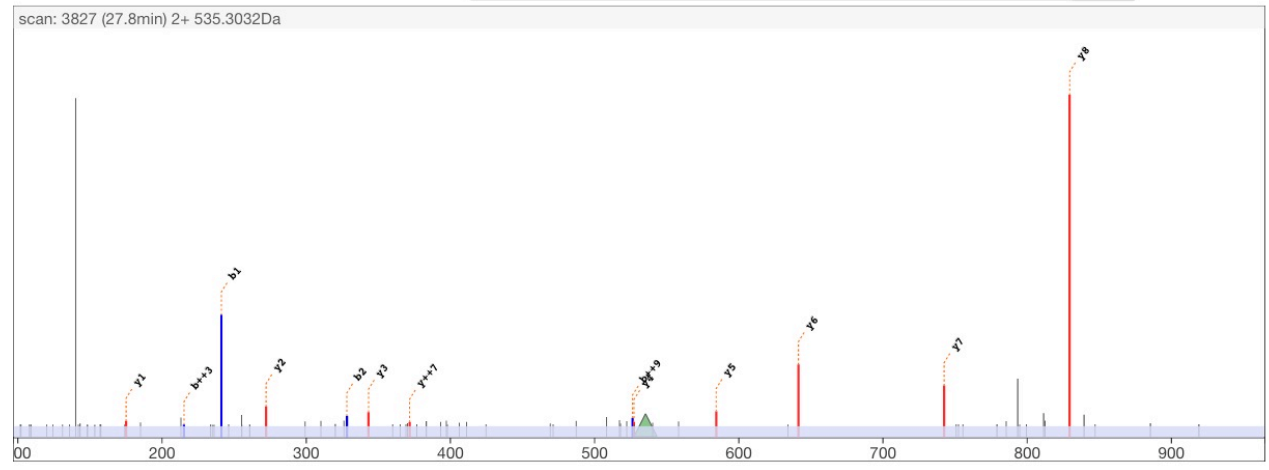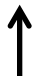

140Da diagnostic ion

|   | b++    | b       |           | y       | y++    |   |
|---|--------|---------|-----------|---------|--------|---|
|   |        |         | Propionyl | 1013.57 | 507.29 | 9 |
| 1 | 121.08 | 241.15  | K         | 829.45  | 415.23 | 8 |
| 2 | 164.60 | 328.19  | S         | 742.42  | 371.71 | 7 |
| 3 | 215.12 | 429.23  | T         | 641.37  | 321.19 | 6 |
| 4 | 243.63 | 486.26  | G         | 584.35  | 292.68 | 5 |
| 5 | 272.14 | 543.28  | G         | 527.33  | 264.17 | 4 |
| 6 | 364.20 | 727.40  | K         | 343.21  | 172.11 | 3 |
| 7 | 399.72 | 798.44  | Propionyl | 272.17  | 136.59 | 2 |
| 8 | 448.25 | 895.49  | A         | 175.12  | 88.06  | 1 |
| 9 | 526.30 | 1051.59 | P         |         |        |   |
|   |        |         | R         |         |        |   |

# H3\_K9-R17: PIC-KSTGGKAPR MS/MS

### Experimental spectrum

scan 6594  
 retention time 39.8min  
 precursor m/z 566.8087  
 precursor charge 2+

### Theoretical

M H<sup>2+</sup> 566.8091  
 MH  $\Delta_{mass}$  Da -0.0008  
 MH  $\Delta_{mass}$  ppm -0.7

### edit peptide

{PIC}K{Propionyl}STGGK{Propionyl}APR align

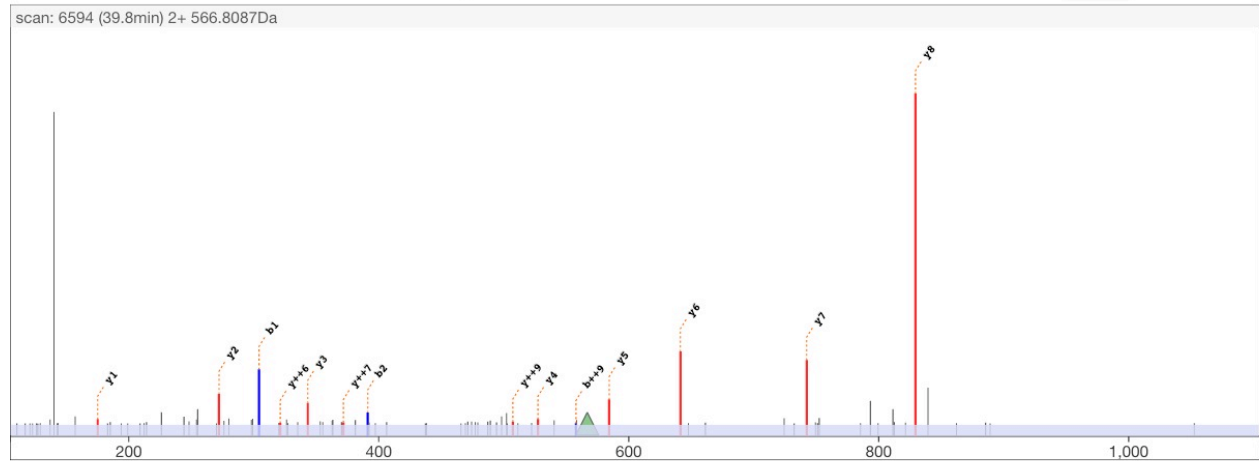

↑  
 140Da diagnostic ion

|   | b++    | b       |           | y       | y++    |   |
|---|--------|---------|-----------|---------|--------|---|
|   | 60.53  | 120.04  | PIC       | 1013.57 | 507.29 | 9 |
| 1 | 152.59 | 304.17  | K         | 829.45  | 415.23 | 8 |
| 2 | 196.10 | 391.20  | Propionyl |         |        |   |
|   |        |         | S         | 742.42  | 371.71 | 7 |
| 3 | 246.63 | 492.25  | T         | 641.37  | 321.19 | 6 |
| 4 | 275.14 | 549.27  | G         | 584.35  | 292.68 | 5 |
| 5 | 303.65 | 606.29  | K         | 527.33  | 264.17 | 4 |
| 6 | 395.71 | 790.41  | Propionyl |         |        |   |
|   |        |         | K         | 343.21  | 172.11 | 3 |
| 7 | 431.23 | 861.45  | A         | 272.17  | 136.59 | 2 |
| 8 | 479.75 | 958.50  | P         | 175.12  | 88.06  | 1 |
| 9 | 557.80 | 1114.60 | R         |         |        |   |

# H3\_K9-R17:

## KS<sup>P</sup>oTGGKAPR

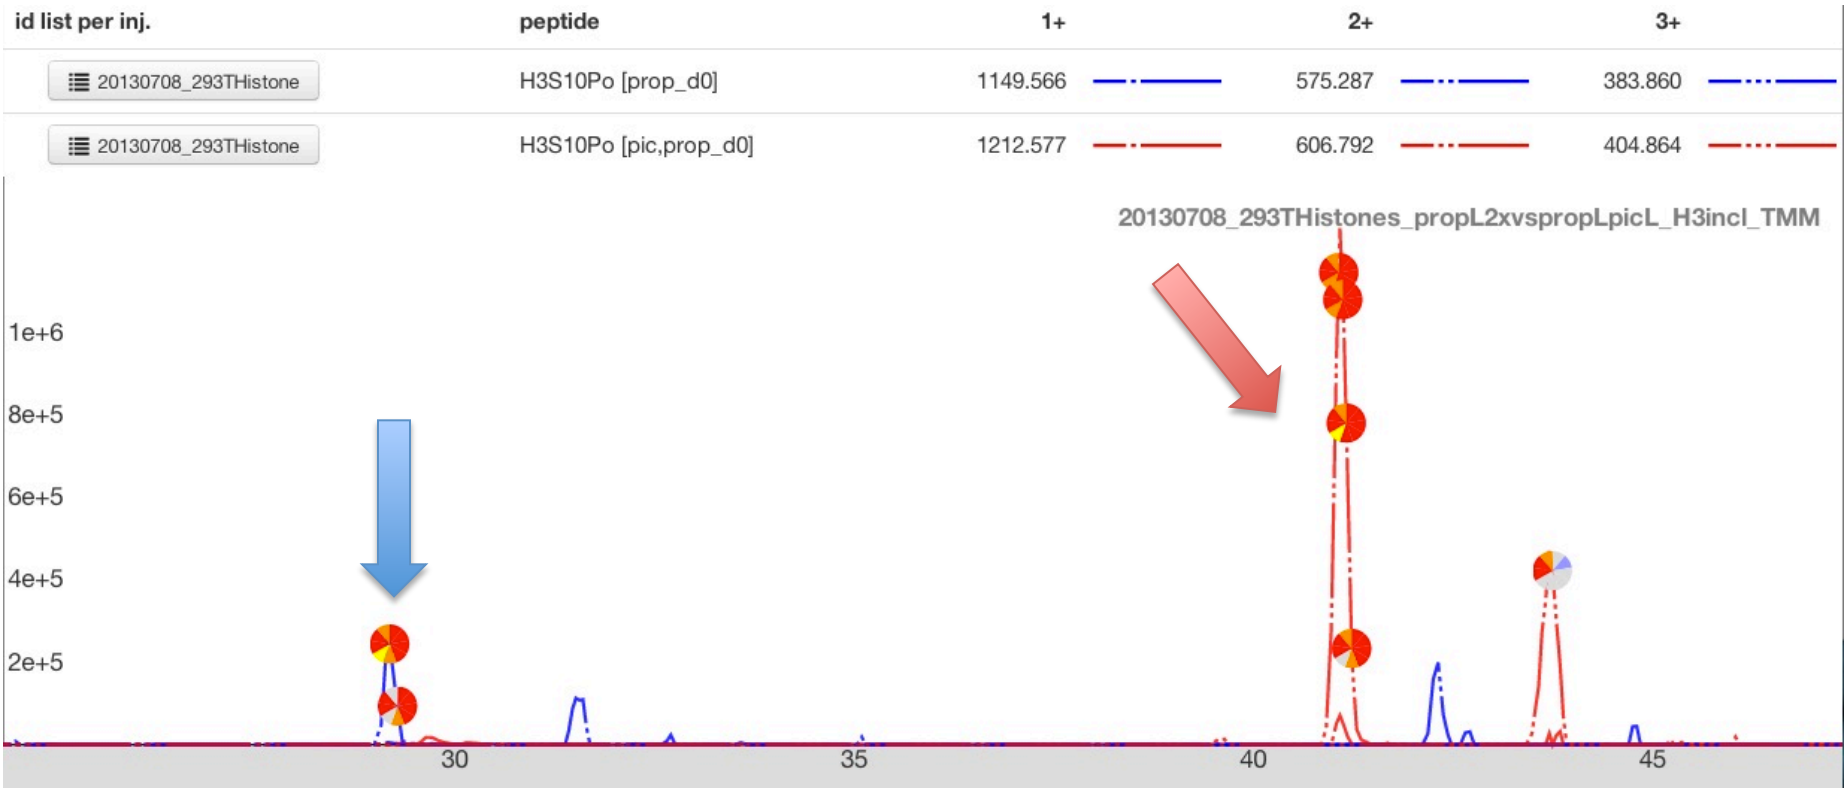

Quanti event: 28.8-29.9min

| injection                                           | peptide               | charge | m/z       | auc    |
|-----------------------------------------------------|-----------------------|--------|-----------|--------|
| 20130708_293THistones_propL2xvspropLpicL_H3incl_TMM | H3S10Po [prop_d0]     | 1      | 1149.5664 | 4.4e+4 |
| 20130708_293THistones_propL2xvspropLpicL_H3incl_TMM | H3S10Po [pic,prop_d0] | 1      | 1212.5773 | 0.0e+0 |
| 20130708_293THistones_propL2xvspropLpicL_H3incl_TMM | H3S10Po [prop_d0]     | 2      | 575.2868  | 2.6e+6 |
| 20130708_293THistones_propL2xvspropLpicL_H3incl_TMM | H3S10Po [pic,prop_d0] | 2      | 606.7923  | 2.7e+5 |
| 20130708_293THistones_propL2xvspropLpicL_H3incl_TMM | H3S10Po [prop_d0]     | 3      | 383.8603  | 0.0e+0 |
| 20130708_293THistones_propL2xvspropLpicL_H3incl_TMM | H3S10Po [pic,prop_d0] | 3      | 404.8639  | 0.0e+0 |

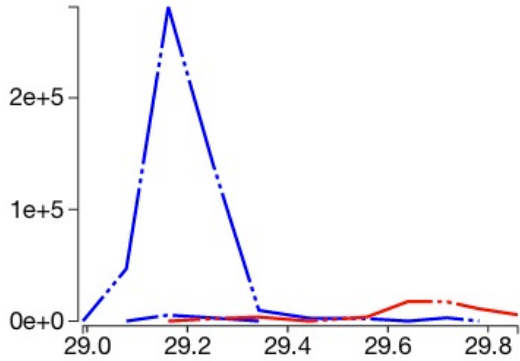

Quanti event: 40.7-41.7min

| injection                                           | peptide               | charge | m/z       | auc    |
|-----------------------------------------------------|-----------------------|--------|-----------|--------|
| 20130708_293THistones_propL2xvspropLpicL_H3incl_TMM | H3S10Po [prop_d0]     | 1      | 1149.5664 | 0.0e+0 |
| 20130708_293THistones_propL2xvspropLpicL_H3incl_TMM | H3S10Po [pic,prop_d0] | 1      | 1212.5773 | 5.6e+5 |
| 20130708_293THistones_propL2xvspropLpicL_H3incl_TMM | H3S10Po [prop_d0]     | 2      | 575.2868  | 0.0e+0 |
| 20130708_293THistones_propL2xvspropLpicL_H3incl_TMM | H3S10Po [pic,prop_d0] | 2      | 606.7923  | 1.4e+7 |
| 20130708_293THistones_propL2xvspropLpicL_H3incl_TMM | H3S10Po [prop_d0]     | 3      | 383.8603  | 0.0e+0 |
| 20130708_293THistones_propL2xvspropLpicL_H3incl_TMM | H3S10Po [pic,prop_d0] | 3      | 404.8639  | 0.0e+0 |

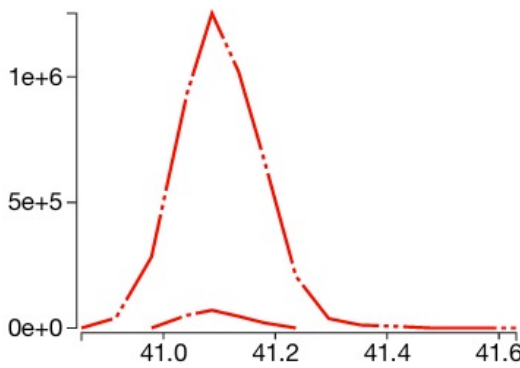

# H3\_K9-R17: Prop-KSPoTGGKAPR MS/MS

### Experimental spectrum

scan 4041  
 retention time 29.2min  
 precursor m/z 575.2859  
 precursor charge 2+

### Theoretical

M H<sup>2+</sup> 575.2868  
 MH  $\Delta_{mass}$  Da -0.0019  
 MH  $\Delta_{mass}$  ppm -1.6

### edit peptide

{Propionyl}K{Propionyl}S{Phospho}TGGK{Propionyl}APR align

140Da diagnostic ion

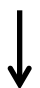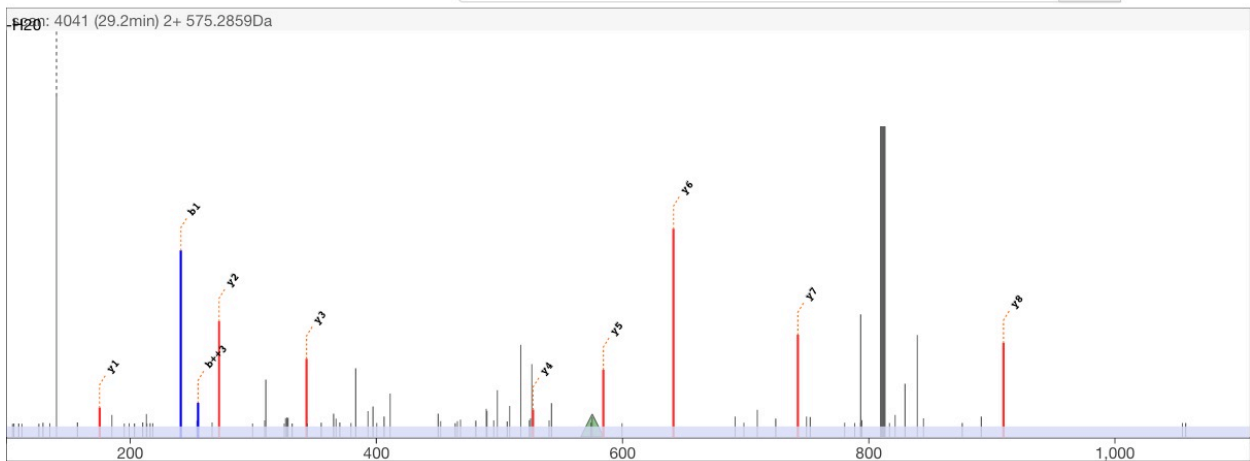

| Anchor        |          | Current         |          |
|---------------|----------|-----------------|----------|
| click on peak |          | mouse over peak |          |
| m/z           | 909.4182 | m/z             | 811.4407 |
| intensity     | 5692     | intensity       | 20427    |
| int. rank     | 6        | int. rank       | 84       |

**Explanation?**  
 delta mass could be...  
 $\Delta_{m/z}$  -97.97742

**Tune the seq**  
 Align anchor peak

b2,y3,y5++

match

↑  
 y8 – H3PO4

|   | b++    | b       |           | y       | y++    |   |
|---|--------|---------|-----------|---------|--------|---|
|   |        |         | Propionyl | 1093.54 | 547.27 | 9 |
| 1 | 121.08 | 241.15  | K         |         |        |   |
|   |        |         | Propionyl | 909.42  | 455.21 | 8 |
| 2 | 204.58 | 408.15  | S         |         |        |   |
|   |        |         | Phospho   | 742.42  | 371.71 | 7 |
| 3 | 255.10 | 509.20  | T         |         |        |   |
|   |        |         | G         | 641.37  | 321.19 | 6 |
| 4 | 283.61 | 566.22  | K         |         |        |   |
|   |        |         | Propionyl | 584.35  | 292.68 | 5 |
| 5 | 312.13 | 623.24  | K         |         |        |   |
|   |        |         | Propionyl | 527.33  | 264.17 | 4 |
| 6 | 404.19 | 807.36  | K         |         |        |   |
|   |        |         | Propionyl | 343.21  | 172.11 | 3 |
| 7 | 439.70 | 878.40  | A         |         |        |   |
|   |        |         | P         | 272.17  | 136.59 | 2 |
| 8 | 488.23 | 975.45  | R         |         |        |   |
|   |        |         |           | 175.12  | 88.06  | 1 |
| 9 | 566.28 | 1131.56 |           |         |        |   |



140Da diagnostic ion

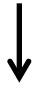

**Experimental spectrum**

scan 7004  
 retention time 41.1min  
 precursor m/z 606.7916  
 precursor charge 2+

**Theoretical**

M H<sup>2+</sup> 606.7923  
 MH Δ<sub>mass</sub> Da -0.0014  
 MH Δ<sub>mass</sub> ppm -1.2

**edit peptide**

{PIC}K{Propionyl}S{Phospho}TGGK{Propionyl}APR align

y8 – H3PO4

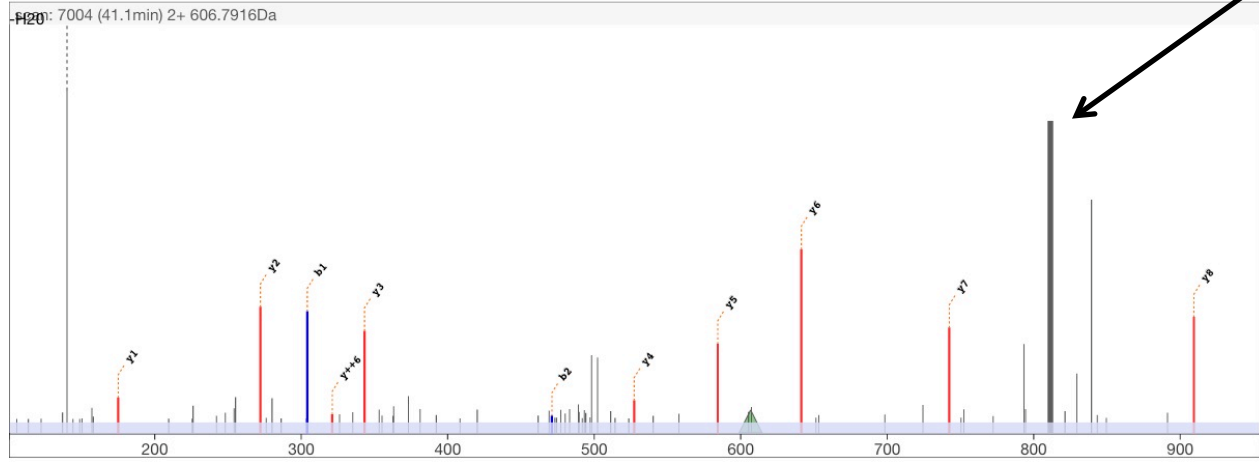

|   | b++    | b       |           | y       | y++    |   |
|---|--------|---------|-----------|---------|--------|---|
|   | 60.53  | 120.04  | PIC       | 1093.54 | 547.27 | 9 |
| 1 | 152.59 | 304.17  | K         | 909.42  | 455.21 | 8 |
| 2 | 236.09 | 471.16  | S         | 742.42  | 371.71 | 7 |
| 3 | 286.61 | 572.21  | Phospho   | 641.37  | 321.19 | 6 |
| 4 | 315.12 | 629.23  | T         | 584.35  | 292.68 | 5 |
| 5 | 343.63 | 686.25  | G         | 527.33  | 264.17 | 4 |
| 6 | 435.69 | 870.38  | K         | 343.21  | 172.11 | 3 |
| 7 | 471.21 | 941.41  | Propionyl | 272.17  | 136.59 | 2 |
| 8 | 519.74 | 1038.47 | A         | 175.12  | 88.06  | 1 |
| 9 | 597.79 | 1194.57 | P         |         |        |   |
|   |        |         | R         |         |        |   |

**Anchor**

click on peak  
 m/z 909.4173  
 intensity 26401  
 int. rank 4

**Current**

mouse over peak  
 m/z 811.4409  
 intensity 75425  
 int. rank 75

**Explanation?**

delta mass could be...  
 Δ<sub>m/z</sub> -97.97644

**Tune the seq**

Align anchor peak

b2,y3,y5++

match

# H3\_K9-R17:

## KSPropTGGKAPR

Mixed peaks for S10/T11-propionylation, only S10-prop data shown.

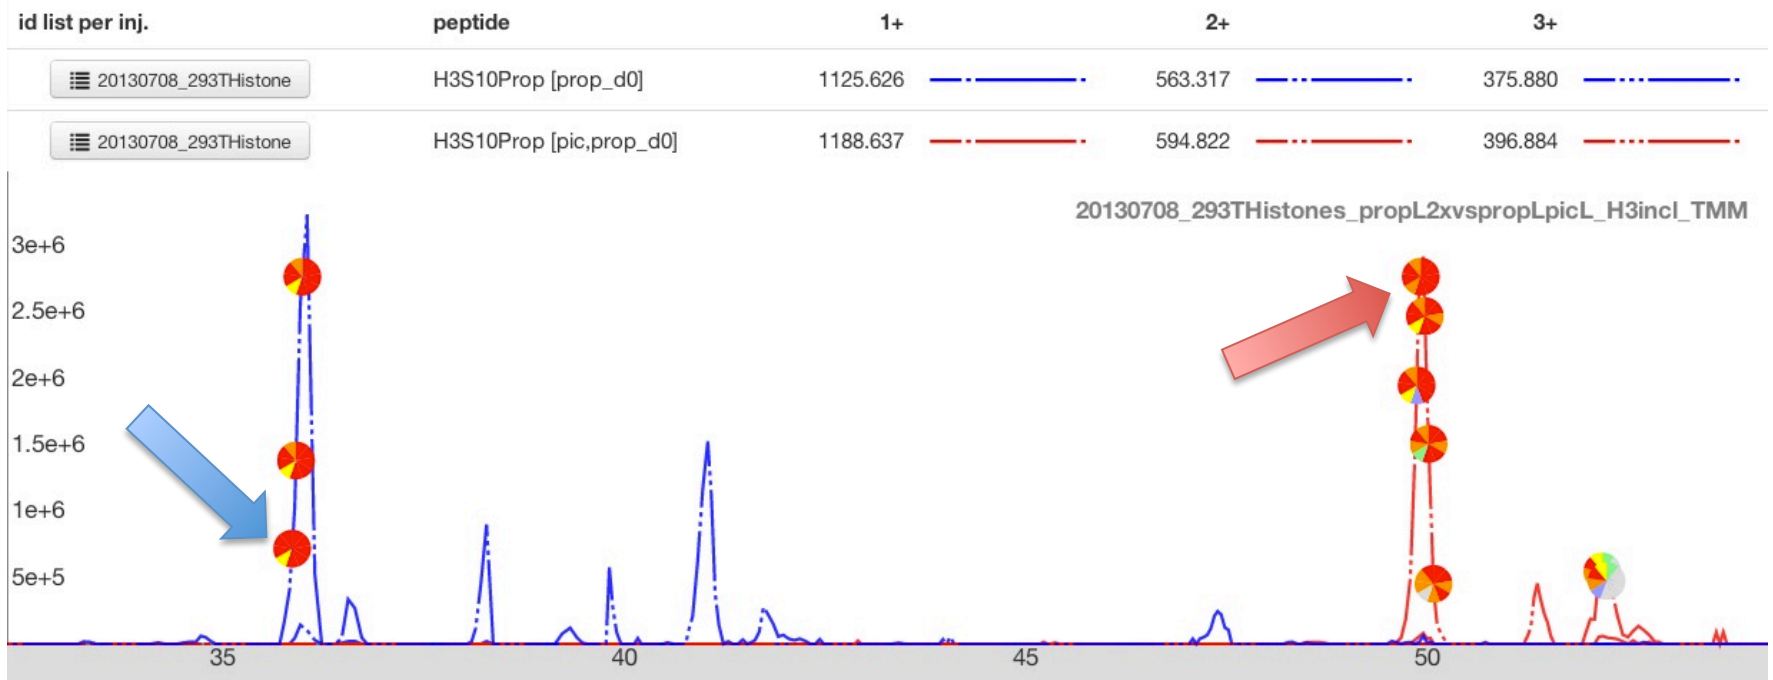

## Quanti event: 35.7-36.3min

| injection                                           | peptide                 | charge | m/z       | auc    |
|-----------------------------------------------------|-------------------------|--------|-----------|--------|
| 20130708_293THistones_propL2xvspropLpicL_H3incl_TMM | H3S10Prop [prop_d0]     | 1      | 1125.6263 | 8.7e+5 |
| 20130708_293THistones_propL2xvspropLpicL_H3incl_TMM | H3S10Prop [pic,prop_d0] | 1      | 1188.6372 | 0.0e+0 |
| 20130708_293THistones_propL2xvspropLpicL_H3incl_TMM | H3S10Prop [prop_d0]     | 2      | 563.3168  | 2.2e+7 |
| 20130708_293THistones_propL2xvspropLpicL_H3incl_TMM | H3S10Prop [pic,prop_d0] | 2      | 594.8222  | 0.0e+0 |
| 20130708_293THistones_propL2xvspropLpicL_H3incl_TMM | H3S10Prop [prop_d0]     | 3      | 375.8803  | 0.0e+0 |
| 20130708_293THistones_propL2xvspropLpicL_H3incl_TMM | H3S10Prop [pic,prop_d0] | 3      | 396.8839  | 0.0e+0 |

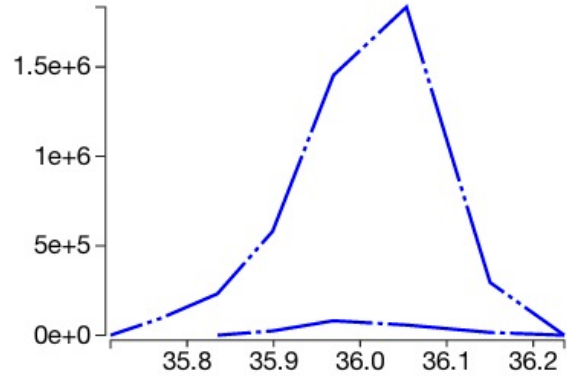

## Quanti event: 49.5-50.3min

| injection                                           | peptide                 | charge | m/z       | auc    |
|-----------------------------------------------------|-------------------------|--------|-----------|--------|
| 20130708_293THistones_propL2xvspropLpicL_H3incl_TMM | H3S10Prop [prop_d0]     | 1      | 1125.6263 | 0.0e+0 |
| 20130708_293THistones_propL2xvspropLpicL_H3incl_TMM | H3S10Prop [pic,prop_d0] | 1      | 1188.6372 | 4.1e+5 |
| 20130708_293THistones_propL2xvspropLpicL_H3incl_TMM | H3S10Prop [prop_d0]     | 2      | 563.3168  | 2.7e+5 |
| 20130708_293THistones_propL2xvspropLpicL_H3incl_TMM | H3S10Prop [pic,prop_d0] | 2      | 594.8222  | 1.9e+7 |
| 20130708_293THistones_propL2xvspropLpicL_H3incl_TMM | H3S10Prop [prop_d0]     | 3      | 375.8803  | 0.0e+0 |
| 20130708_293THistones_propL2xvspropLpicL_H3incl_TMM | H3S10Prop [pic,prop_d0] | 3      | 396.8839  | 0.0e+0 |

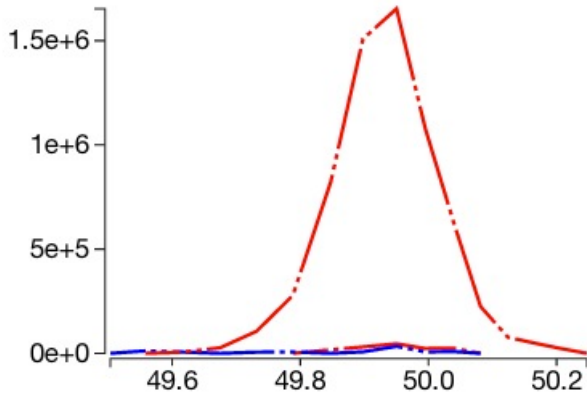

### Experimental spectrum

scan 5596  
 retention time 35.9min  
 precursor m/z 563.3149  
 precursor charge 2+

### Theoretical

M H<sup>2+</sup> 563.3168  
 MH Δ<sub>mass</sub> Da -0.0036  
 MH Δ<sub>mass</sub> ppm -3.2

### edit peptide

{Propionyl}K{Propionyl}S{Propionyl}TGGK{Propionyl}APR align

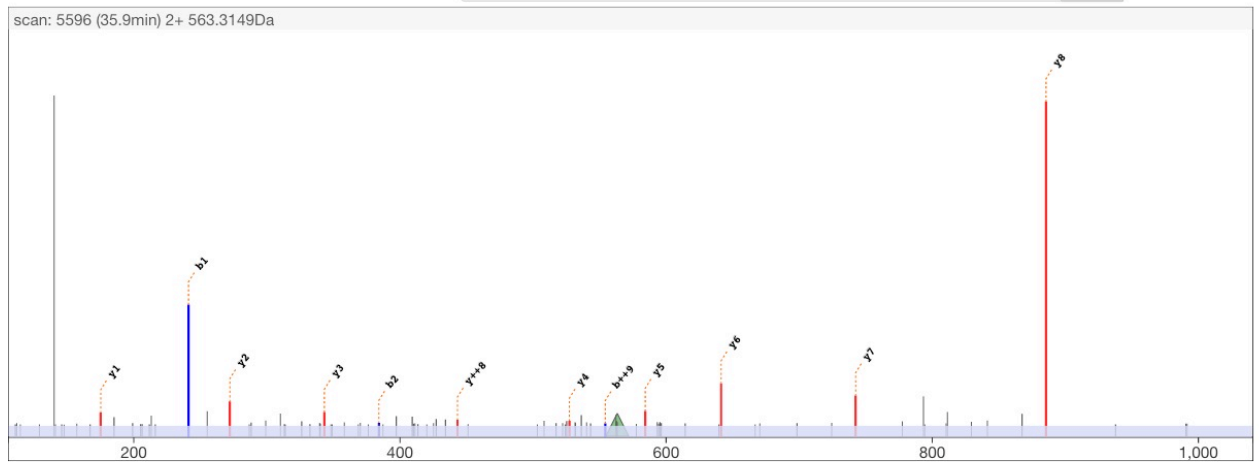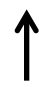

140Da diagnostic ion

|   | b++    | b       |           | y       | y++    |   |
|---|--------|---------|-----------|---------|--------|---|
|   |        |         | Propionyl | 1069.60 | 535.30 | 9 |
| 1 | 121.08 | 241.15  | K         |         |        |   |
|   |        |         | Propionyl | 885.48  | 443.24 | 8 |
| 2 | 192.61 | 384.21  | S         |         |        |   |
|   |        |         | Propionyl | 742.42  | 371.71 | 7 |
| 3 | 243.13 | 485.26  | T         |         |        |   |
|   |        |         | G         | 641.37  | 321.19 | 6 |
| 4 | 271.64 | 542.28  | G         | 584.35  | 292.68 | 5 |
|   |        |         | K         | 527.33  | 264.17 | 4 |
| 5 | 300.16 | 599.30  | Propionyl |         |        |   |
| 6 | 392.22 | 783.42  | A         | 343.21  | 172.11 | 3 |
|   |        |         | P         | 272.17  | 136.59 | 2 |
| 7 | 427.73 | 854.46  | R         | 175.12  | 88.06  | 1 |
| 8 | 476.26 | 951.51  |           |         |        |   |
| 9 | 554.31 | 1107.62 |           |         |        |   |

**Experimental spectrum**

scan 9639  
 retention time 49.9min  
 precursor m/z 594.8226  
 precursor charge 2+

**Theoretical**

M H<sup>2+</sup> 594.8222  
 MH Δ<sub>mass</sub> Da 0.0008  
 MH Δ<sub>mass</sub> ppm 0.7

**edit peptide**

{PIC}K{Propionyl}S{Propionyl}TGGK{Propionyl}APR

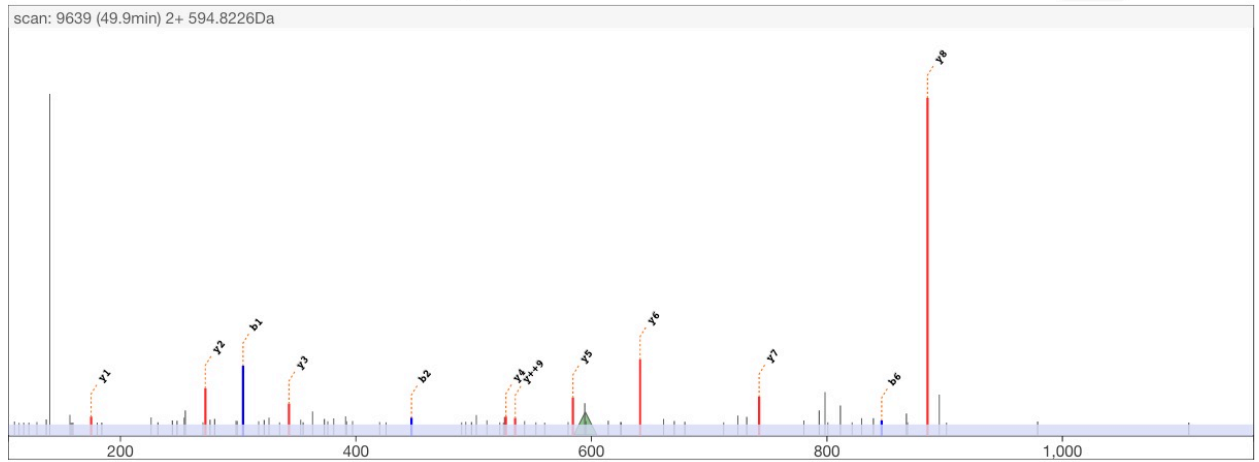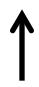

140Da diagnostic ion

|   | b++    | b       |             | y       | y++    |   |
|---|--------|---------|-------------|---------|--------|---|
|   | 60.53  | 120.04  | PIC         | 1069.60 | 535.30 | 9 |
| 1 | 152.59 | 304.17  | K           | 885.48  | 443.24 | 8 |
| 2 | 224.12 | 447.22  | Propionyl S | 742.42  | 371.71 | 7 |
| 3 | 274.64 | 548.27  | T           | 641.37  | 321.19 | 6 |
| 4 | 303.15 | 605.29  | G           | 584.35  | 292.68 | 5 |
| 5 | 331.66 | 662.31  | G           | 527.33  | 264.17 | 4 |
| 6 | 423.72 | 846.44  | Propionyl K | 343.21  | 172.11 | 3 |
| 7 | 459.24 | 917.47  | A           | 272.17  | 136.59 | 2 |
| 8 | 507.77 | 1014.53 | P           | 175.12  | 88.06  | 1 |
| 9 | 585.82 | 1170.63 | R           |         |        |   |

# H3\_K9-R17:

## KMe1STGGKAPR

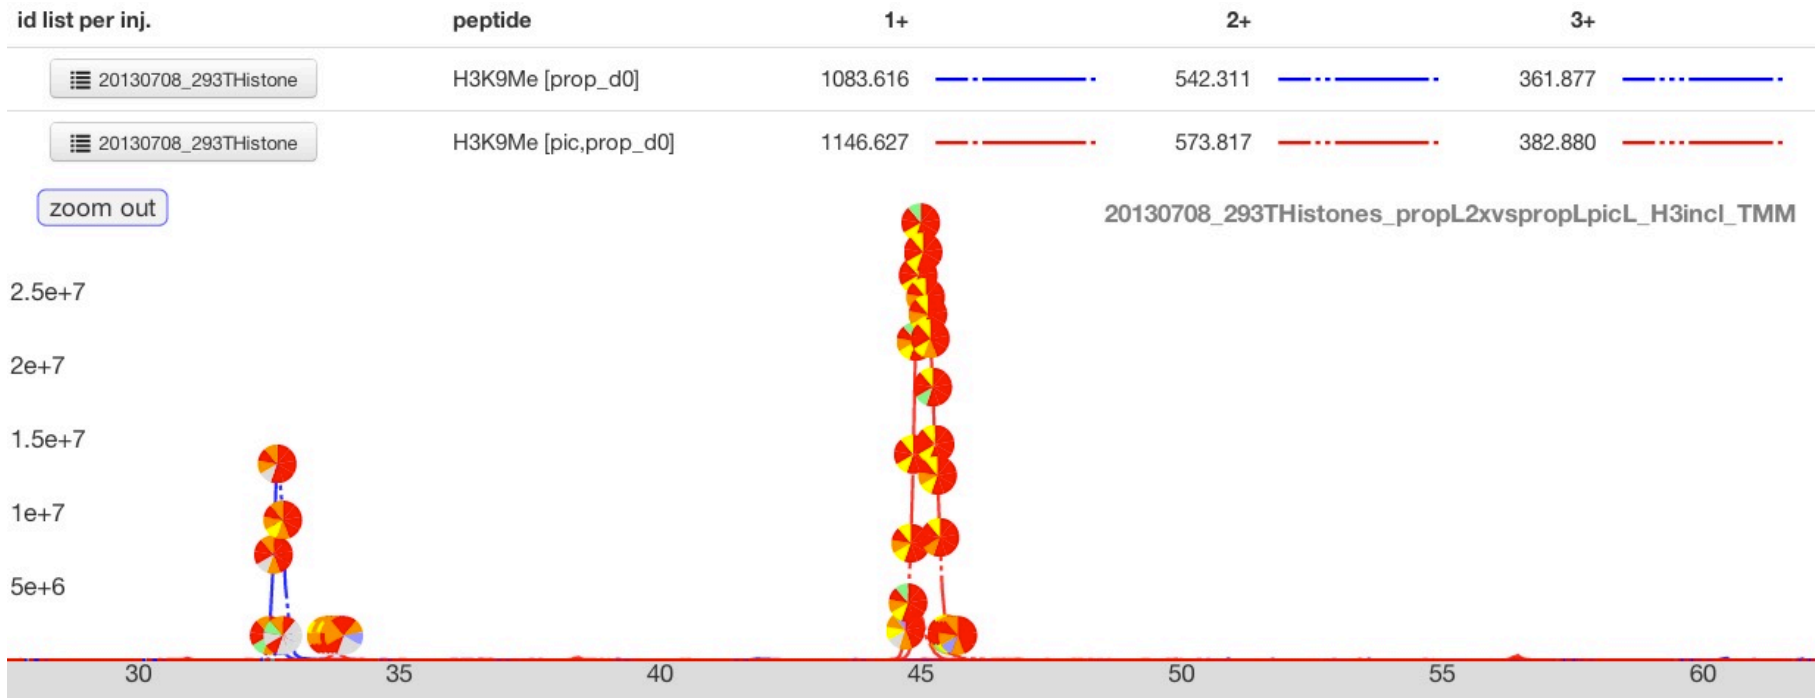

## Quanti event: 32.3-33.3min

| injection                                           | peptide              | charge | m/z       | auc    |
|-----------------------------------------------------|----------------------|--------|-----------|--------|
| 20130708_293THistones_propL2xvspropLpicL_H3incl_TMM | H3K9Me [prop_d0]     | 1      | 1083.6157 | 8.8e+6 |
| 20130708_293THistones_propL2xvspropLpicL_H3incl_TMM | H3K9Me [pic,prop_d0] | 1      | 1146.6266 | 0.0e+0 |
| 20130708_293THistones_propL2xvspropLpicL_H3incl_TMM | H3K9Me [prop_d0]     | 2      | 542.3115  | 1.9e+8 |
| 20130708_293THistones_propL2xvspropLpicL_H3incl_TMM | H3K9Me [pic,prop_d0] | 2      | 573.8169  | 5.8e+4 |
| 20130708_293THistones_propL2xvspropLpicL_H3incl_TMM | H3K9Me [prop_d0]     | 3      | 361.8767  | 0.0e+0 |
| 20130708_293THistones_propL2xvspropLpicL_H3incl_TMM | H3K9Me [pic,prop_d0] | 3      | 382.8804  | 0.0e+0 |

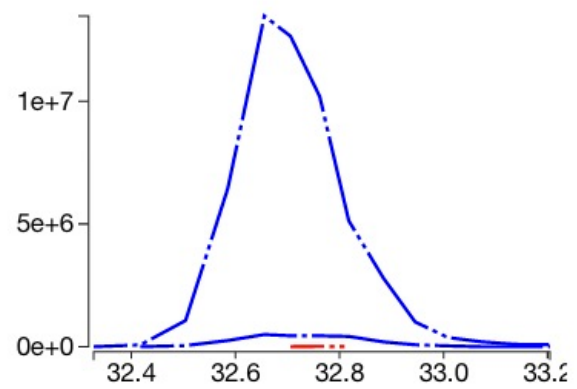

## Quanti event: 44.3-45.9min

| injection                                           | peptide              | charge | m/z       | auc    |
|-----------------------------------------------------|----------------------|--------|-----------|--------|
| 20130708_293THistones_propL2xvspropLpicL_H3incl_TMM | H3K9Me [prop_d0]     | 1      | 1083.6157 | 0.0e+0 |
| 20130708_293THistones_propL2xvspropLpicL_H3incl_TMM | H3K9Me [pic,prop_d0] | 1      | 1146.6266 | 6.0e+7 |
| 20130708_293THistones_propL2xvspropLpicL_H3incl_TMM | H3K9Me [prop_d0]     | 2      | 542.3115  | 9.1e+4 |
| 20130708_293THistones_propL2xvspropLpicL_H3incl_TMM | H3K9Me [pic,prop_d0] | 2      | 573.8169  | 7.6e+8 |
| 20130708_293THistones_propL2xvspropLpicL_H3incl_TMM | H3K9Me [prop_d0]     | 3      | 361.8767  | 0.0e+0 |
| 20130708_293THistones_propL2xvspropLpicL_H3incl_TMM | H3K9Me [pic,prop_d0] | 3      | 382.8804  | 3.7e+5 |

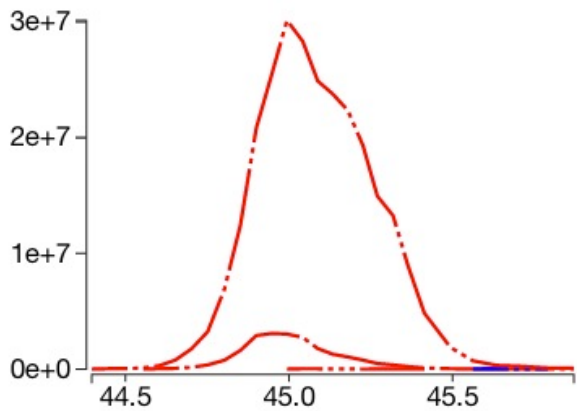

# H3\_K9-R17: Prop-KMe1STGGKAPR MS/MS

### Experimental spectrum

scan 4851  
 retention time 32.8min  
 precursor m/z 542.3109  
 precursor charge 2+

### Theoretical

M H<sup>2+</sup> 542.3115  
 MH Δ<sub>mass</sub> Da -0.0011  
 MH Δ<sub>mass</sub> ppm -1.0

### edit peptide

{Propionyl}K[Methyl,Propionyl]STGGK{Propionyl}APR align

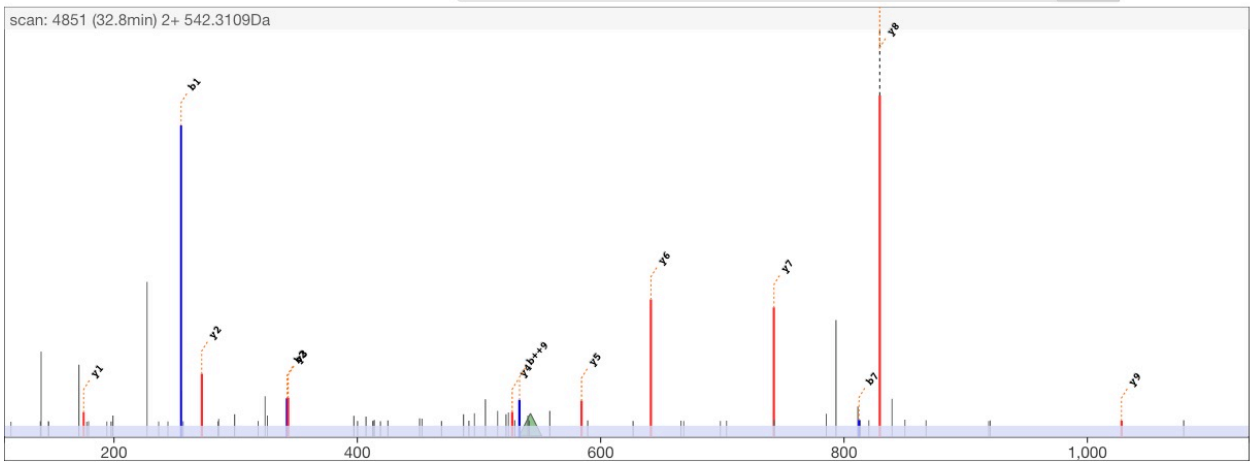

↑  
 140Da diagnostic ion

↙  
 171Da diagnostic ion

|   | b++    | b       |                  | y       | y++    |   |
|---|--------|---------|------------------|---------|--------|---|
|   |        |         | Propionyl        | 1027.59 | 514.30 | 9 |
| 1 | 128.09 | 255.17  | K                | 829.45  | 415.23 | 8 |
| 2 | 171.60 | 342.20  | Methyl,Propionyl | 742.42  | 371.71 | 7 |
| 3 | 222.13 | 443.25  | S                | 641.37  | 321.19 | 6 |
| 4 | 250.64 | 500.27  | T                | 584.35  | 292.68 | 5 |
| 5 | 279.15 | 557.29  | G                | 527.33  | 264.17 | 4 |
| 6 | 371.21 | 741.41  | G                | 343.21  | 172.11 | 3 |
| 7 | 406.73 | 812.45  | K                | 272.17  | 136.59 | 2 |
| 8 | 455.26 | 909.50  | Propionyl        | 175.12  | 88.06  | 1 |
| 9 | 533.31 | 1065.61 | A                |         |        |   |
|   |        |         | P                |         |        |   |
|   |        |         | R                |         |        |   |



# H3\_K9-R17: Prop-KMe1STGGKAPR MS/MS

### Experimental spectrum

scan 8162  
 retention time 45.0min  
 precursor m/z 573.8150  
 precursor charge 2+

### Theoretical

M H<sup>2+</sup> 573.8169  
 MH Δ<sub>mass</sub> Da -0.0039  
 MH Δ<sub>mass</sub> ppm -3.4

### edit peptide

{PIC}K{Methyl,Propionyl}STGGK{Propionyl}APR align

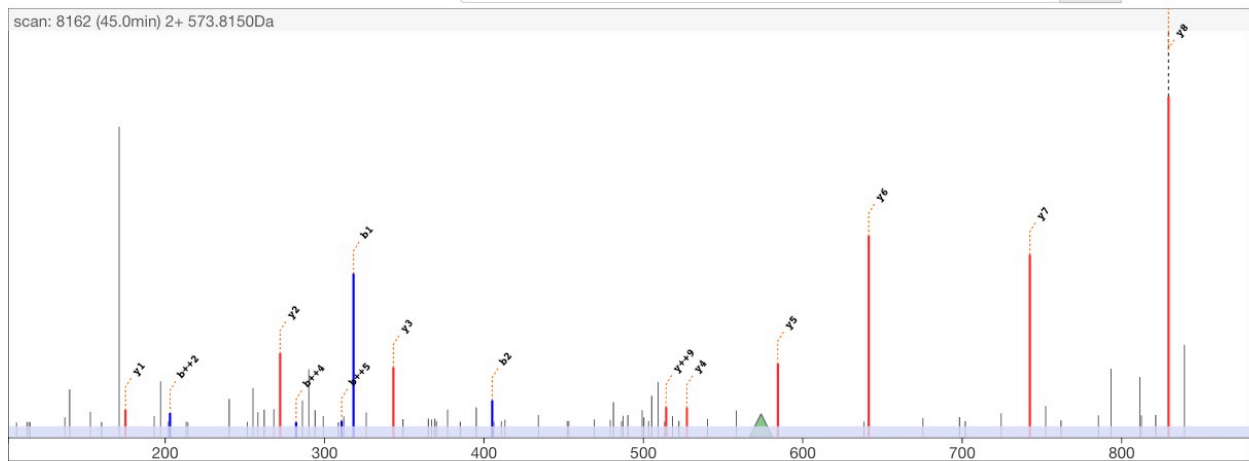

↑  
 171Da diagnostic ion

↑  
 140Da diagnostic ion

|   | b++    | b       |                  | y       | y++    |   |
|---|--------|---------|------------------|---------|--------|---|
|   | 60.53  | 120.04  | PIC              | 1027.59 | 514.30 | 9 |
| 1 | 159.59 | 318.18  | K                | 829.45  | 415.23 | 8 |
| 2 | 203.11 | 405.21  | Methyl,Propionyl | 742.42  | 371.71 | 7 |
|   |        |         | S                |         |        |   |
| 3 | 253.63 | 506.26  | T                | 641.37  | 321.19 | 6 |
| 4 | 282.14 | 563.28  | G                | 584.35  | 292.68 | 5 |
| 5 | 310.66 | 620.30  | G                | 527.33  | 264.17 | 4 |
| 6 | 402.72 | 804.43  | K                | 343.21  | 172.11 | 3 |
| 7 | 438.23 | 875.46  | Propionyl        | 272.17  | 136.59 | 2 |
| 8 | 486.76 | 972.51  | A                | 175.12  | 88.06  | 1 |
| 9 | 564.81 | 1128.62 | P                |         |        |   |
|   |        |         | R                |         |        |   |

# H3\_K9-R17:

## KMe1SPoTGGKAPR

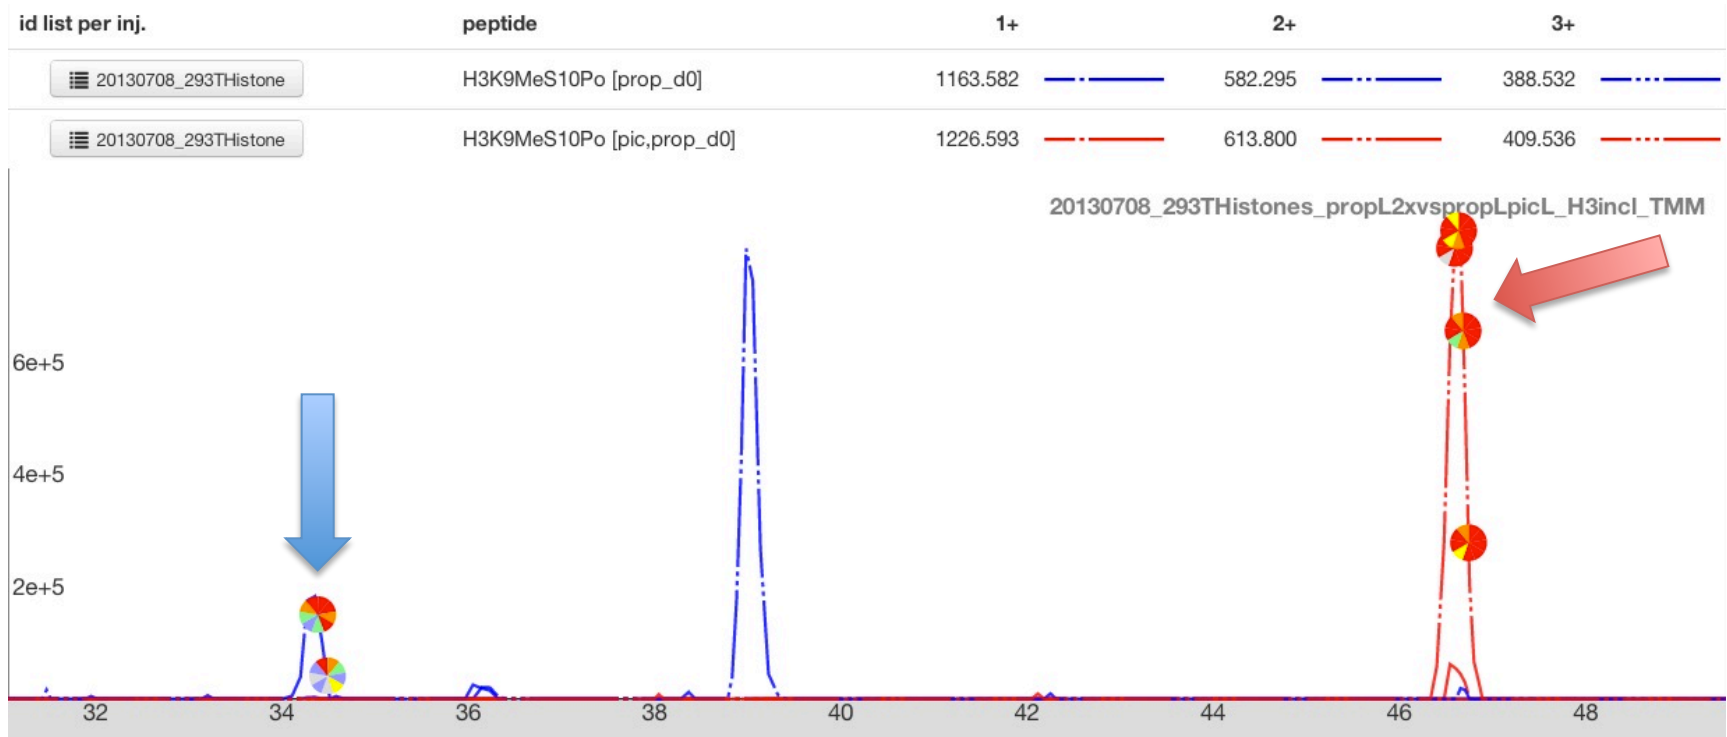

### Quanti event: 34.0-34.7min

| injection                                           | peptide                   | charge | m/z       | auc    |
|-----------------------------------------------------|---------------------------|--------|-----------|--------|
| 20130708_293THistones_propL2xvspropLpicL_H3incl_TMM | H3K9MeS10Po [prop_d0]     | 1      | 1163.5820 | 2.6e+4 |
| 20130708_293THistones_propL2xvspropLpicL_H3incl_TMM | H3K9MeS10Po [pic,prop_d0] | 1      | 1226.5929 | 0.0e+0 |
| 20130708_293THistones_propL2xvspropLpicL_H3incl_TMM | H3K9MeS10Po [prop_d0]     | 2      | 582.2946  | 2.4e+6 |
| 20130708_293THistones_propL2xvspropLpicL_H3incl_TMM | H3K9MeS10Po [pic,prop_d0] | 2      | 613.8001  | 0.0e+0 |
| 20130708_293THistones_propL2xvspropLpicL_H3incl_TMM | H3K9MeS10Po [prop_d0]     | 3      | 388.5322  | 0.0e+0 |
| 20130708_293THistones_propL2xvspropLpicL_H3incl_TMM | H3K9MeS10Po [pic,prop_d0] | 3      | 409.5358  | 0.0e+0 |

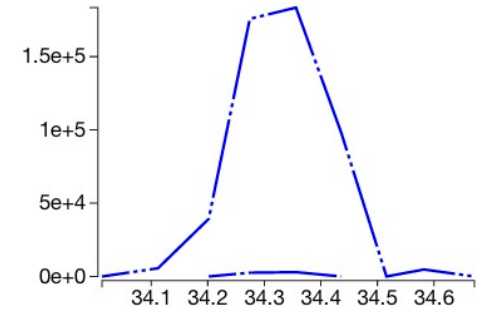

### Quanti event: 46.1-47.2min

| injection                                           | peptide                   | charge | m/z       | auc    |
|-----------------------------------------------------|---------------------------|--------|-----------|--------|
| 20130708_293THistones_propL2xvspropLpicL_H3incl_TMM | H3K9MeS10Po [prop_d0]     | 1      | 1163.5820 | 0.0e+0 |
| 20130708_293THistones_propL2xvspropLpicL_H3incl_TMM | H3K9MeS10Po [pic,prop_d0] | 1      | 1226.5929 | 6.3e+5 |
| 20130708_293THistones_propL2xvspropLpicL_H3incl_TMM | H3K9MeS10Po [prop_d0]     | 2      | 582.2946  | 1.0e+5 |
| 20130708_293THistones_propL2xvspropLpicL_H3incl_TMM | H3K9MeS10Po [pic,prop_d0] | 2      | 613.8001  | 1.2e+7 |
| 20130708_293THistones_propL2xvspropLpicL_H3incl_TMM | H3K9MeS10Po [prop_d0]     | 3      | 388.5322  | 0.0e+0 |
| 20130708_293THistones_propL2xvspropLpicL_H3incl_TMM | H3K9MeS10Po [pic,prop_d0] | 3      | 409.5358  | 0.0e+0 |

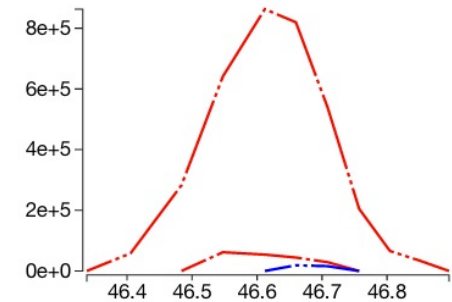

# H3\_K9-R17: Prop-KMe1SPoTGGKAPR MS/MS

### Experimental spectrum

scan 5193  
 retention time 34.4min  
 precursor m/z 582.2943  
 precursor charge 2+

### Theoretical

M H<sup>2+</sup> 582.2946  
 MH  $\Delta_{mass}$  Da -0.0007  
 MH  $\Delta_{mass}$  ppm -0.6

### edit peptide

{Propionyl}K(Methyl,Propionyl)S(Phospho)TGGK{Propionyl}APR align

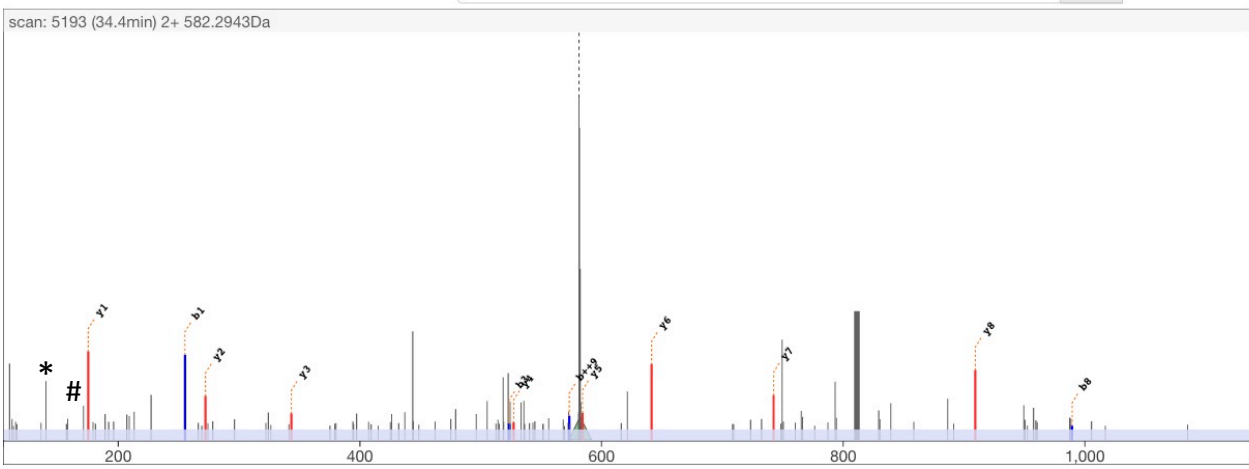

|   | b++    | b       |                    | y       | y++    |   |
|---|--------|---------|--------------------|---------|--------|---|
|   |        |         | Propionyl          | 1107.56 | 554.28 | 9 |
| 1 | 128.09 | 255.17  | K                  | 909.42  | 455.21 | 8 |
| 2 | 211.59 | 422.17  | Methyl/Propionyl S | 742.42  | 371.71 | 7 |
| 3 | 262.11 | 523.22  | Phospho T          | 641.37  | 321.19 | 6 |
| 4 | 290.62 | 580.24  | G                  | 584.35  | 292.68 | 5 |
| 5 | 319.13 | 637.26  | G                  | 527.33  | 264.17 | 4 |
| 6 | 411.19 | 821.38  | K                  | 343.21  | 172.11 | 3 |
| 7 | 446.71 | 892.42  | Propionyl A        | 272.17  | 136.59 | 2 |
| 8 | 495.24 | 989.47  | P                  | 175.12  | 88.06  | 1 |
| 9 | 573.29 | 1145.57 | R                  |         |        |   |

| Anchor         | Current         |
|----------------|-----------------|
| click on peak  | mouse over peak |
| m/z 909.4161   | m/z 811.4410    |
| intensity 2883 | intensity 5721  |
| int. rank 8    | int. rank 119   |

**Explanation?**  
 delta mass could be...  
 $\Delta_{m/z}$  -97.97504

**Tune the seq**  
 Align anchor peak  
 b2,y3,y5++  
 match

↑  
 y8 – H3PO4

\* = 140Da diagnostic ion  
 # = 171Da diagnostic ion

### Experimental spectrum

scan 8634  
 retention time 46.6min  
 precursor m/z 613.7991  
 precursor charge 2+

### Theoretical

M H<sup>2+</sup> 613.8001  
 MH Δ<sub>mass</sub> Da -0.0020  
 MH Δ<sub>mass</sub> ppm -1.7

### edit peptide

{PIC}K{Methyl,Propionyl}S{Phospho}TGGK{Propionyl}APR align

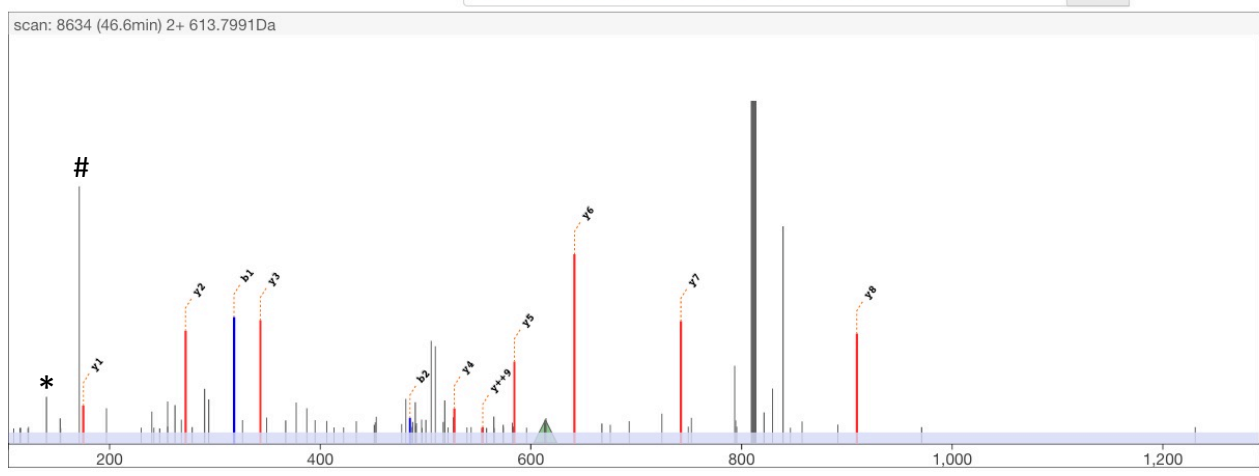

| Anchor        |          | Current         |          |
|---------------|----------|-----------------|----------|
| click on peak |          | mouse over peak |          |
| m/z           | 909.4153 | m/z             | 811.4393 |
| intensity     | 13893    | intensity       | 46635    |
| int. rank     | 7        | int. rank       | 89       |

**Explanation?**  
 delta mass could be...  
 Δ<sub>m/z</sub> -97.97601

**Tune the seq**  
 Align anchor peak

\* = 140Da diagnostic ion  
 # = 171Da diagnostic ion

↑  
 y8 – H3PO4

|   | b++    | b       |                                                                                                    | y       | y++    |   |
|---|--------|---------|----------------------------------------------------------------------------------------------------|---------|--------|---|
|   | 60.53  | 120.04  |                                                                                                    | 1107.56 | 554.28 | 9 |
| 1 | 159.59 | 318.18  | PIC<br>K<br>{Methyl,Propionyl}<br>S<br>{Phospho}<br>T<br>G<br>G<br>K<br>{Propionyl}<br>A<br>P<br>R | 909.42  | 455.21 | 8 |
| 2 | 243.09 | 485.18  |                                                                                                    | 742.42  | 371.71 | 7 |
| 3 | 293.62 | 586.23  |                                                                                                    | 641.37  | 321.19 | 6 |
| 4 | 322.13 | 643.25  |                                                                                                    | 584.35  | 292.68 | 5 |
| 5 | 350.64 | 700.27  |                                                                                                    | 527.33  | 264.17 | 4 |
| 6 | 442.70 | 884.39  |                                                                                                    | 343.21  | 172.11 | 3 |
| 7 | 478.22 | 955.43  |                                                                                                    | 272.17  | 136.59 | 2 |
| 8 | 526.74 | 1052.48 |                                                                                                    | 175.12  | 88.06  | 1 |
| 9 | 604.79 | 1208.58 |                                                                                                    |         |        |   |

# H3\_K9-R17:

## KMe2STGGKAPR

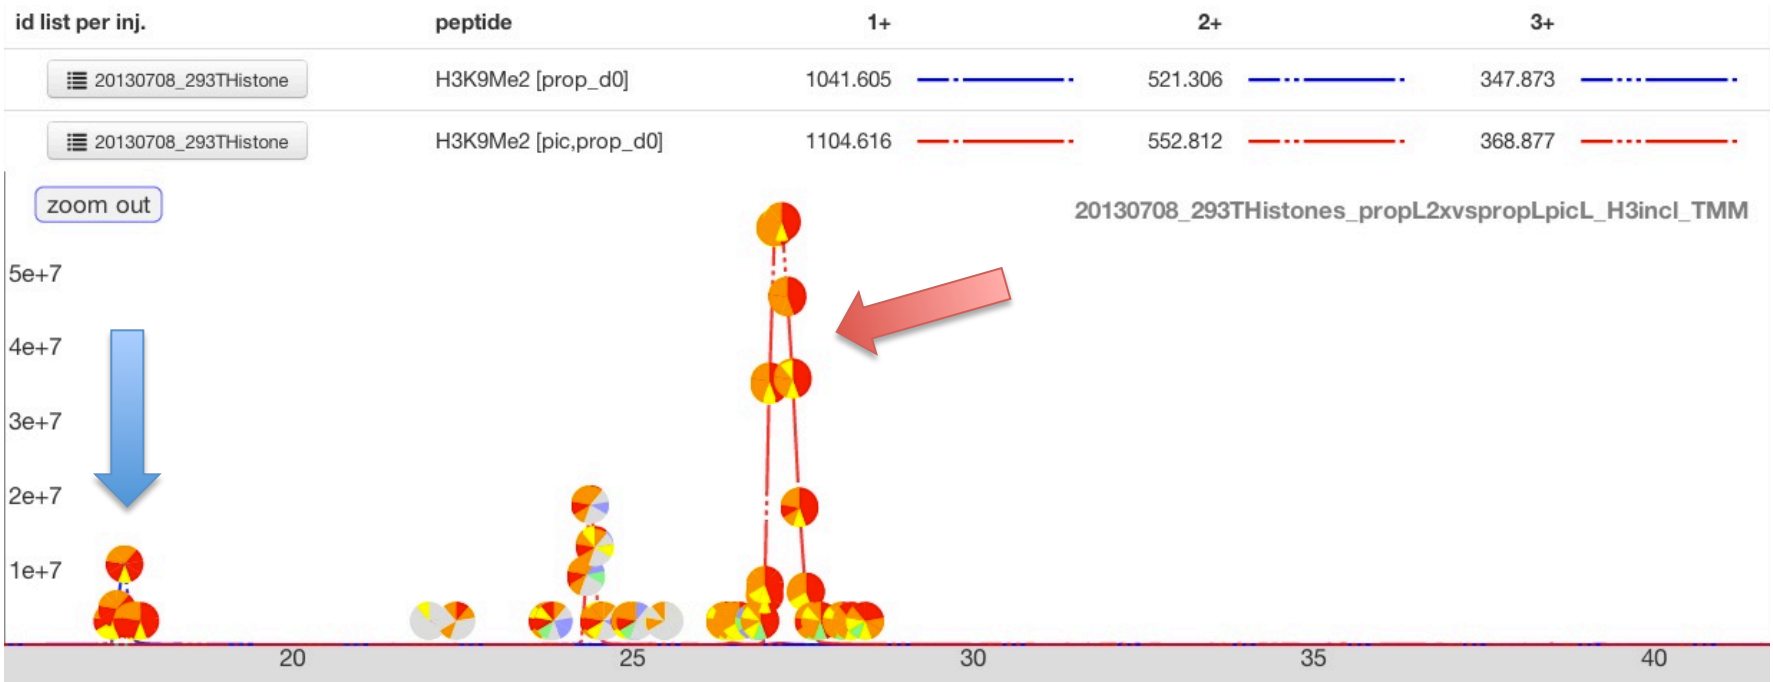

## Quanti event: 16.7-18.5min

| injection                                           | peptide               | charge | m/z       | auc    |
|-----------------------------------------------------|-----------------------|--------|-----------|--------|
| 20130708_293THistones_propL2xvspropLpicL_H3incl_TMM | H3K9Me2 [prop_d0]     | 1      | 1041.6051 | 2.9e+4 |
| 20130708_293THistones_propL2xvspropLpicL_H3incl_TMM | H3K9Me2 [pic,prop_d0] | 1      | 1104.6160 | 0.0e+0 |
| 20130708_293THistones_propL2xvspropLpicL_H3incl_TMM | H3K9Me2 [prop_d0]     | 2      | 521.3062  | 1.2e+8 |
| 20130708_293THistones_propL2xvspropLpicL_H3incl_TMM | H3K9Me2 [pic,prop_d0] | 2      | 552.8116  | 0.0e+0 |
| 20130708_293THistones_propL2xvspropLpicL_H3incl_TMM | H3K9Me2 [prop_d0]     | 3      | 347.8732  | 0.0e+0 |
| 20130708_293THistones_propL2xvspropLpicL_H3incl_TMM | H3K9Me2 [pic,prop_d0] | 3      | 368.8769  | 0.0e+0 |

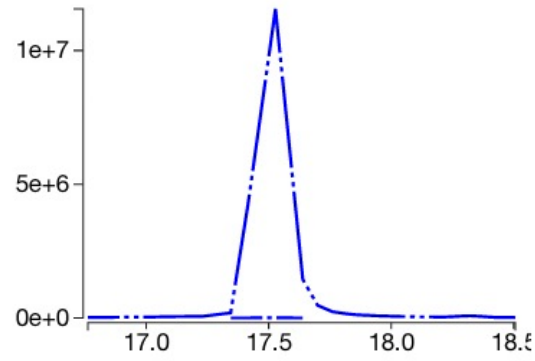

## Quanti event: 26.2-28.5min

| injection                                           | peptide               | charge | m/z       | auc    |
|-----------------------------------------------------|-----------------------|--------|-----------|--------|
| 20130708_293THistones_propL2xvspropLpicL_H3incl_TMM | H3K9Me2 [prop_d0]     | 1      | 1041.6051 | 0.0e+0 |
| 20130708_293THistones_propL2xvspropLpicL_H3incl_TMM | H3K9Me2 [pic,prop_d0] | 1      | 1104.6160 | 3.2e+6 |
| 20130708_293THistones_propL2xvspropLpicL_H3incl_TMM | H3K9Me2 [prop_d0]     | 2      | 521.3062  | 0.0e+0 |
| 20130708_293THistones_propL2xvspropLpicL_H3incl_TMM | H3K9Me2 [pic,prop_d0] | 2      | 552.8116  | 1.4e+9 |
| 20130708_293THistones_propL2xvspropLpicL_H3incl_TMM | H3K9Me2 [prop_d0]     | 3      | 347.8732  | 0.0e+0 |
| 20130708_293THistones_propL2xvspropLpicL_H3incl_TMM | H3K9Me2 [pic,prop_d0] | 3      | 368.8769  | 0.0e+0 |

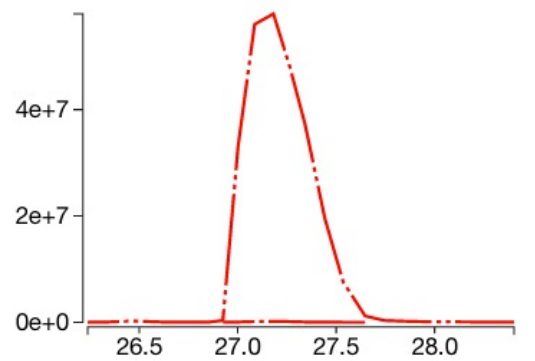

# H3\_K9-R17: Prop-KMe2STGGKAPR MS/MS

### Experimental spectrum

scan 2130  
 retention time 17.5min  
 precursor m/z 521.3054  
 precursor charge 2+

### Theoretical

M H<sup>2+</sup> 521.3062  
 MH  $\Delta_{mass}$  Da -0.0016  
 MH  $\Delta_{mass}$  ppm -1.5

### edit peptide

{Propionyl}K{Dimethyl}STGGK{Propionyl}APR

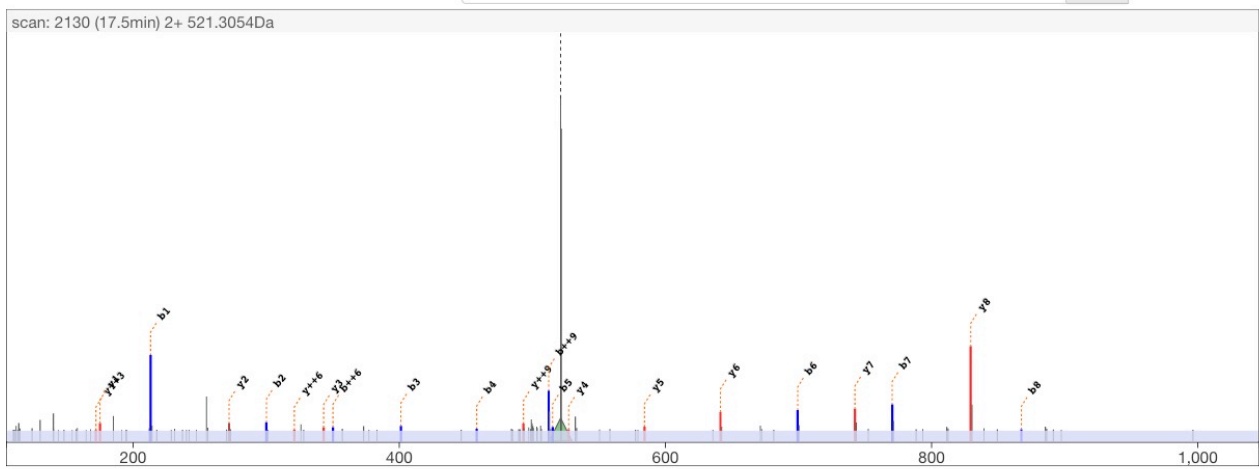

|   | b++    | b       |           | y      | y++    |   |
|---|--------|---------|-----------|--------|--------|---|
|   |        |         | Propionyl | 985.58 | 493.29 | 9 |
| 1 | 107.08 | 213.16  | K         |        |        |   |
|   |        |         | Dimethyl  | 829.45 | 415.23 | 8 |
| 2 | 150.60 | 300.19  | S         | 742.42 | 371.71 | 7 |
| 3 | 201.12 | 401.24  | T         | 641.37 | 321.19 | 6 |
| 4 | 229.63 | 458.26  | G         | 584.35 | 292.68 | 5 |
| 5 | 258.14 | 515.28  | G         | 527.33 | 264.17 | 4 |
| 6 | 350.21 | 699.40  | K         |        |        |   |
|   |        |         | Propionyl | 343.21 | 172.11 | 3 |
| 7 | 385.72 | 770.44  | A         |        |        |   |
| 8 | 434.25 | 867.49  | P         | 272.17 | 136.59 | 2 |
| 9 | 512.30 | 1023.59 | R         | 175.12 | 88.06  | 1 |



### Experimental spectrum

scan 3718  
 retention time 27.1min  
 precursor m/z 552.8114  
 precursor charge 2+

### Theoretical

M H<sup>2+</sup> 552.8116  
 MH Δ<sub>mass</sub> Da -0.0005  
 MH Δ<sub>mass</sub> ppm -0.4

### edit peptide

{PIC}K{Dimethyl}STGGK{Propionyl}APR

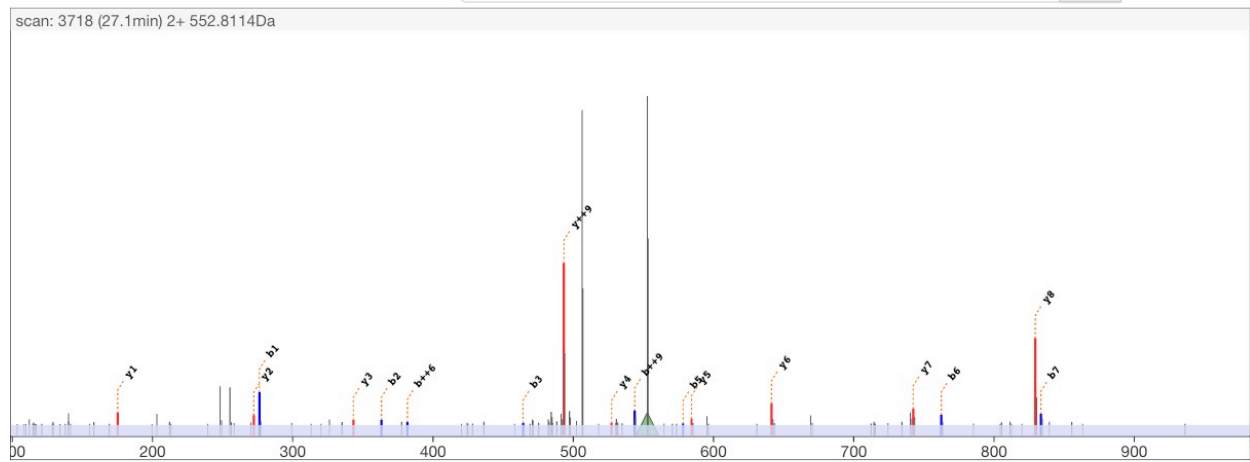

|   | b++    | b       |           | y      | y++    |   |
|---|--------|---------|-----------|--------|--------|---|
|   | 60.53  | 120.04  | PIC       | 985.58 | 493.29 | 9 |
| 1 | 138.59 | 276.17  | K         | 829.45 | 415.23 | 8 |
| 2 | 182.10 | 363.20  | Dimethyl  | 742.42 | 371.71 | 7 |
| 3 | 232.63 | 464.25  | S         | 641.37 | 321.19 | 6 |
| 4 | 261.14 | 521.27  | T         | 584.35 | 292.68 | 5 |
| 5 | 289.65 | 578.29  | G         | 527.33 | 264.17 | 4 |
| 6 | 381.71 | 762.41  | G         | 343.21 | 172.11 | 3 |
| 7 | 417.23 | 833.45  | Propionyl | 272.17 | 136.59 | 2 |
| 8 | 465.76 | 930.50  | K         | 175.12 | 88.06  | 1 |
| 9 | 543.81 | 1086.61 | A         |        |        |   |
|   |        |         | P         |        |        |   |
|   |        |         | R         |        |        |   |

# H3\_K9-R17:

## KMe2SPoTGGKAPR

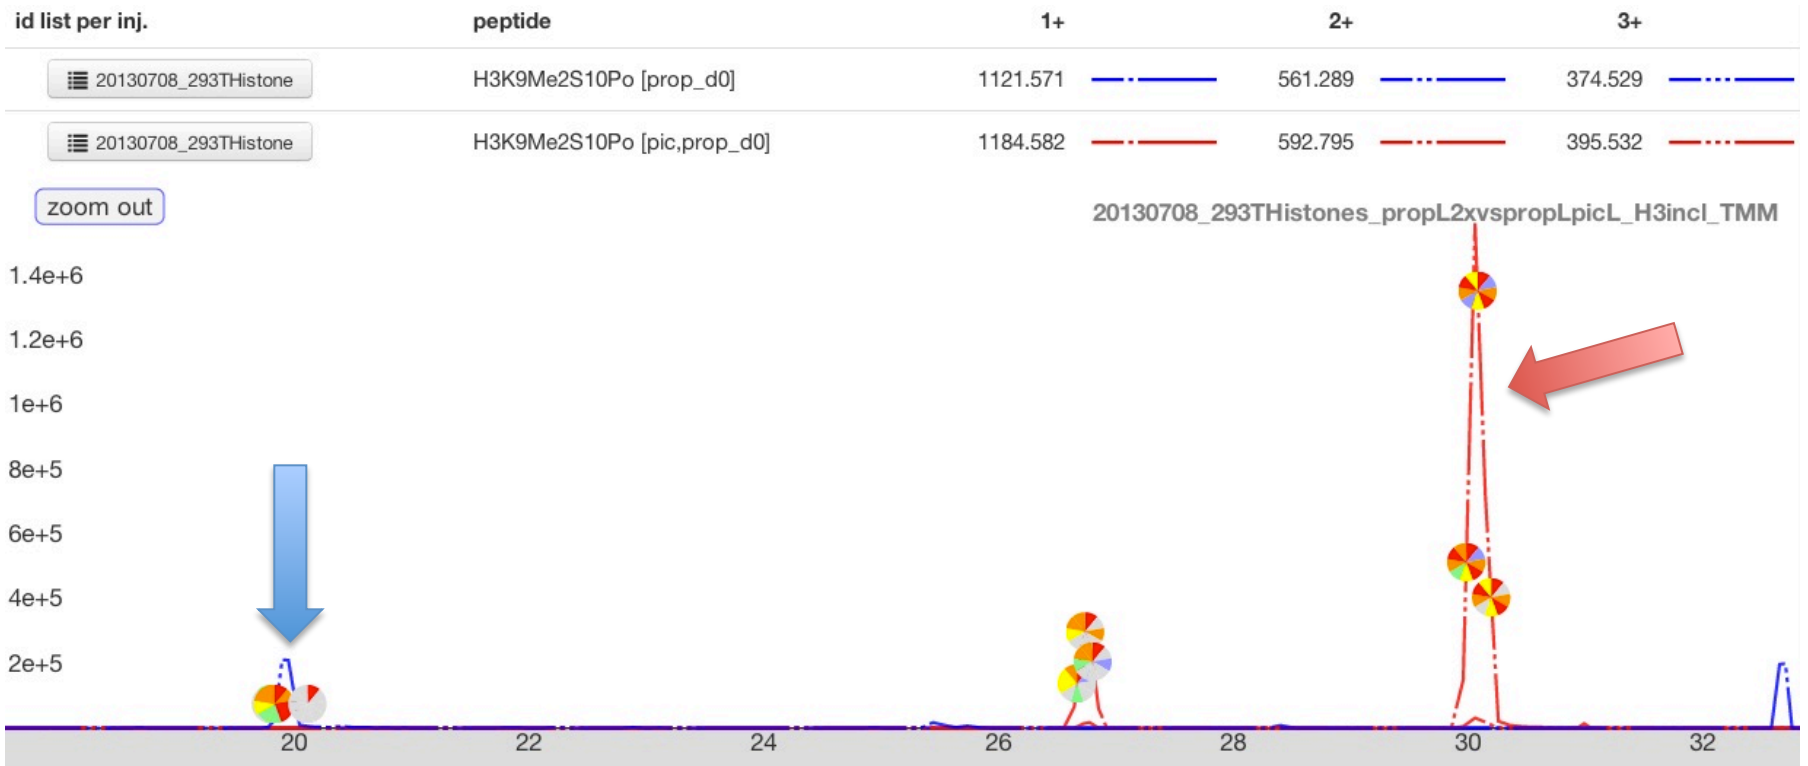

### Quanti event: 19.6-21.0min

| injection                                           | peptide                    | charge | m/z       | auc    |
|-----------------------------------------------------|----------------------------|--------|-----------|--------|
| 20130708_293THistones_propL2xvspropLpicL_H3incl_TMM | H3K9Me2S10Po [prop_d0]     | 1      | 1121.5715 | 0.0e+0 |
| 20130708_293THistones_propL2xvspropLpicL_H3incl_TMM | H3K9Me2S10Po [pic,prop_d0] | 1      | 1184.5824 | 0.0e+0 |
| 20130708_293THistones_propL2xvspropLpicL_H3incl_TMM | H3K9Me2S10Po [prop_d0]     | 2      | 561.2894  | 2.0e+6 |
| 20130708_293THistones_propL2xvspropLpicL_H3incl_TMM | H3K9Me2S10Po [pic,prop_d0] | 2      | 592.7948  | 0.0e+0 |
| 20130708_293THistones_propL2xvspropLpicL_H3incl_TMM | H3K9Me2S10Po [prop_d0]     | 3      | 374.5287  | 0.0e+0 |
| 20130708_293THistones_propL2xvspropLpicL_H3incl_TMM | H3K9Me2S10Po [pic,prop_d0] | 3      | 395.5323  | 0.0e+0 |

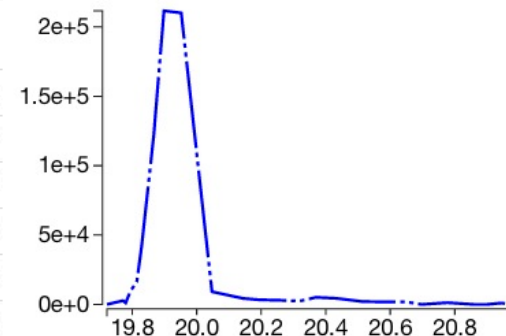

### Quanti event: 29.4-30.8min

| injection                                           | peptide                    | charge | m/z       | auc    |
|-----------------------------------------------------|----------------------------|--------|-----------|--------|
| 20130708_293THistones_propL2xvspropLpicL_H3incl_TMM | H3K9Me2S10Po [prop_d0]     | 1      | 1121.5715 | 0.0e+0 |
| 20130708_293THistones_propL2xvspropLpicL_H3incl_TMM | H3K9Me2S10Po [pic,prop_d0] | 1      | 1184.5824 | 0.0e+0 |
| 20130708_293THistones_propL2xvspropLpicL_H3incl_TMM | H3K9Me2S10Po [prop_d0]     | 2      | 561.2894  | 0.0e+0 |
| 20130708_293THistones_propL2xvspropLpicL_H3incl_TMM | H3K9Me2S10Po [pic,prop_d0] | 2      | 592.7948  | 1.4e+7 |
| 20130708_293THistones_propL2xvspropLpicL_H3incl_TMM | H3K9Me2S10Po [prop_d0]     | 3      | 374.5287  | 0.0e+0 |
| 20130708_293THistones_propL2xvspropLpicL_H3incl_TMM | H3K9Me2S10Po [pic,prop_d0] | 3      | 395.5323  | 3.2e+5 |

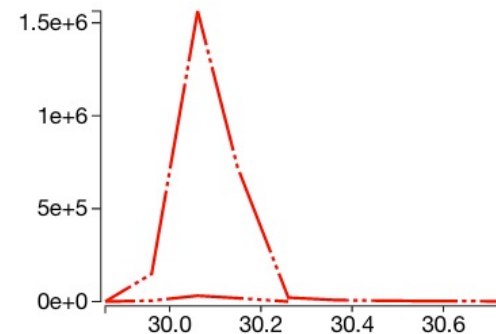

# H3\_K9-R17: Prop-KMe2SPoTGGKAPR MS/MS

### Experimental spectrum

scan 2477  
 retention time 19.8min  
 precursor m/z 561.2886  
 precursor charge 2+

### Theoretical

M H<sup>2+</sup> 561.2894  
 MH  $\Delta_{mass}$  Da -0.0016  
 MH  $\Delta_{mass}$  ppm -1.4

### edit peptide

{Propionyl}K{Dimethyl}S{Phospho}TGGK{Propionyl}APR align

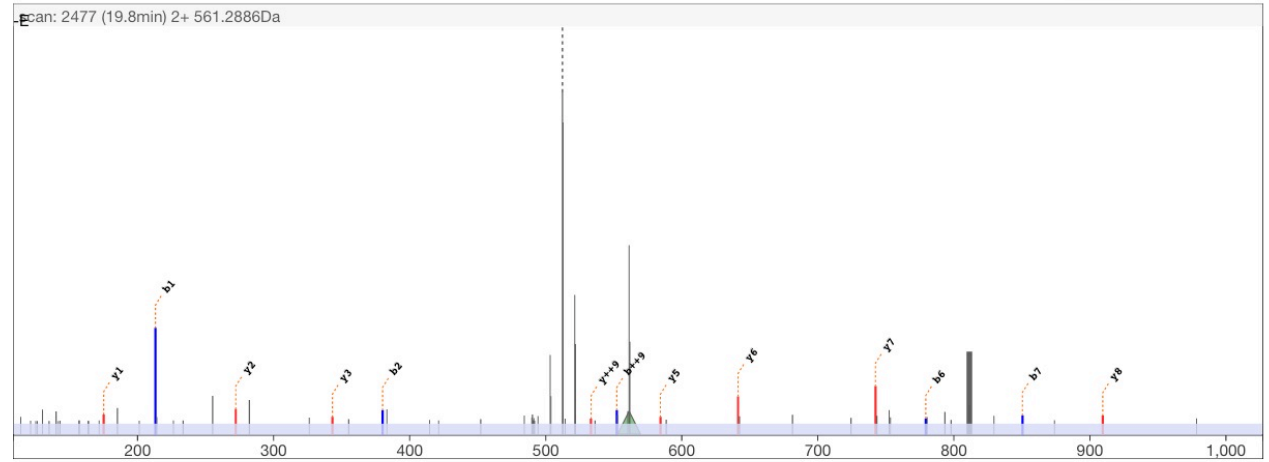

|   | b++    | b       |           | y       | y++    |   |
|---|--------|---------|-----------|---------|--------|---|
|   |        |         | Propionyl | 1065.55 | 533.28 | 9 |
| 1 | 107.08 | 213.16  | K         |         |        |   |
|   |        |         | Dimethyl  | 909.42  | 455.21 | 8 |
| 2 | 190.58 | 380.16  | S         |         |        |   |
|   |        |         | Phospho   | 742.42  | 371.71 | 7 |
| 3 | 241.11 | 481.21  | T         |         |        |   |
|   |        |         | G         | 641.37  | 321.19 | 6 |
| 4 | 269.62 | 538.23  | G         |         |        |   |
|   |        |         | G         | 584.35  | 292.68 | 5 |
| 5 | 298.13 | 595.25  | K         |         |        |   |
|   |        |         | Propionyl | 527.33  | 264.17 | 4 |
| 6 | 390.19 | 779.37  | A         |         |        |   |
|   |        |         | K         | 343.21  | 172.11 | 3 |
| 7 | 425.71 | 850.41  | P         |         |        |   |
|   |        |         | A         | 272.17  | 136.59 | 2 |
| 8 | 474.23 | 947.46  | R         |         |        |   |
|   |        |         | P         | 175.12  | 88.06  | 1 |
| 9 | 552.28 | 1103.56 | R         |         |        |   |

| Anchor        |          | Current         |          |
|---------------|----------|-----------------|----------|
| click on peak |          | mouse over peak |          |
| m/z           | 909.4356 | m/z             | 811.4404 |
| intensity     | 256      | intensity       | 2255     |
| int. rank     | 24       | int. rank       | 3        |

**Explanation?**  
 delta mass could be...  
 $\Delta_{m/z}$  -97.99524

**Tune the seq**  
 Align anchor peak

y8 – H3PO4

# H3\_K9-R17: PIC-KMe2SPoTGGKAPR MS/MS

### Experimental spectrum

scan 4198  
 retention time 30.1min  
 precursor m/z 592.7944  
 precursor charge 2+

### Theoretical

M H<sup>2+</sup> 592.7948  
 MH  $\Delta_{mass}$  Da -0.0009  
 MH  $\Delta_{mass}$  ppm -0.7

### edit peptide

{PIC}K{Dimethyl}S{Phospho}TGGK{Propionyl}APR

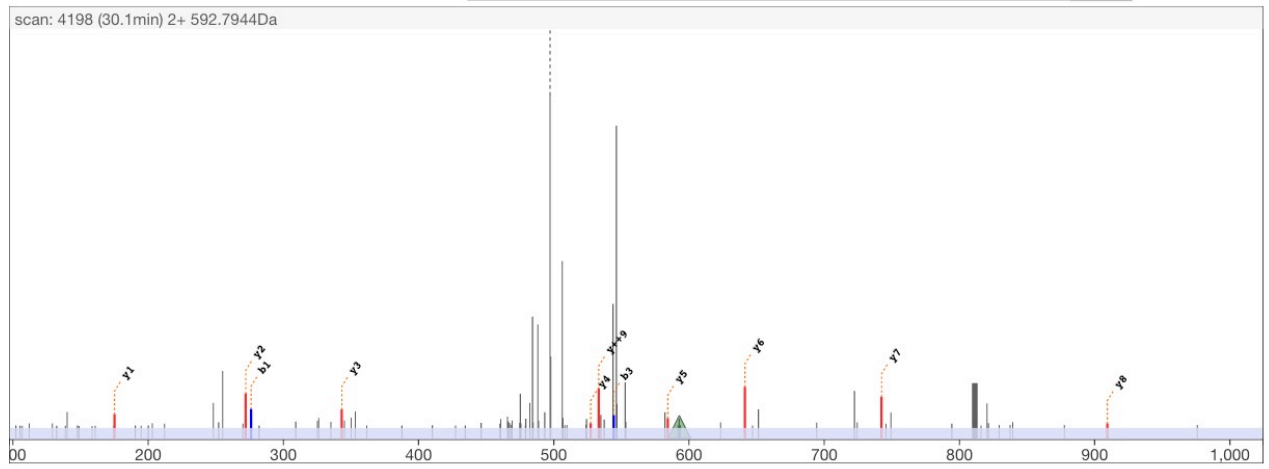

| Anchor         | Current         |
|----------------|-----------------|
| click on peak  | mouse over peak |
| m/z 909.4088   | m/z 811.4411    |
| intensity 2179 | intensity 21541 |
| int. rank 50   | int. rank 4     |

**Explanation?**  
 delta mass could be...  
 $\Delta_{m/z}$  -97.96765

**Tune the seq**  
 Align anchor peak

y8 – H3PO4

|   | b++    | b       |                | y       | y++    |   |
|---|--------|---------|----------------|---------|--------|---|
|   | 60.53  | 120.04  | PIC            | 1065.55 | 533.28 | 9 |
| 1 | 138.59 | 276.17  | K<br>Dimethyl  | 909.42  | 455.21 | 8 |
| 2 | 222.09 | 443.17  | S<br>Phospho   | 742.42  | 371.71 | 7 |
| 3 | 272.61 | 544.22  | T              | 641.37  | 321.19 | 6 |
| 4 | 301.12 | 601.24  | G              | 584.35  | 292.68 | 5 |
| 5 | 329.63 | 658.26  | G              | 527.33  | 264.17 | 4 |
| 6 | 421.69 | 842.38  | K<br>Propionyl | 343.21  | 172.11 | 3 |
| 7 | 457.21 | 913.42  | A              | 272.17  | 136.59 | 2 |
| 8 | 505.74 | 1010.47 | P              | 175.12  | 88.06  | 1 |
| 9 | 583.79 | 1166.57 | R              |         |        |   |

# H3\_K9-R17:

## KMe2SPropTGGKAPR

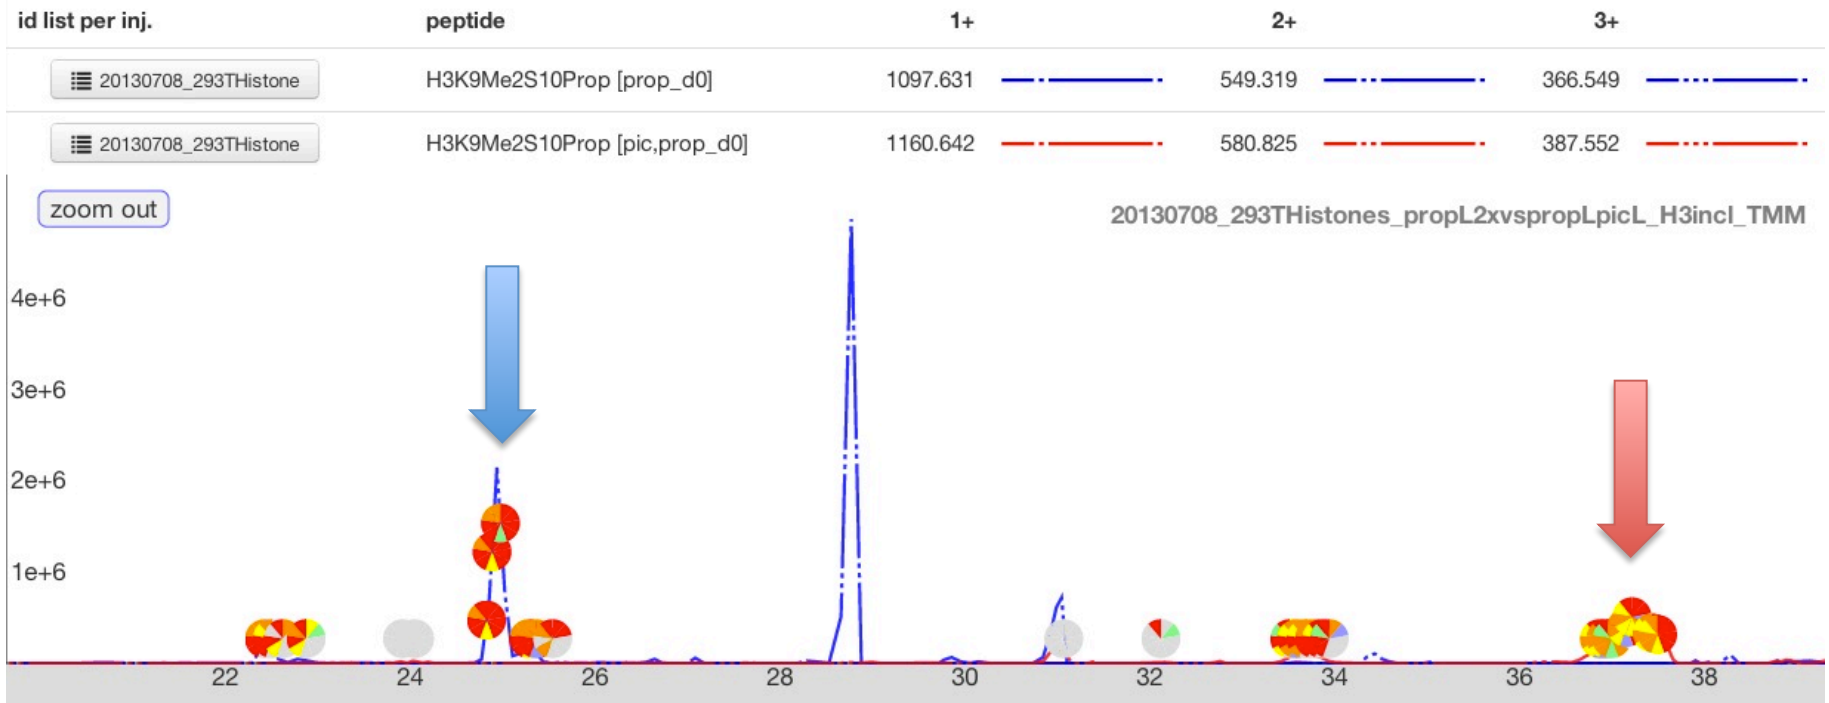

## Quanti event: 24.7-25.5min

| injection                                           | peptide                      | charge | m/z       | auc    |
|-----------------------------------------------------|------------------------------|--------|-----------|--------|
| 20130708_293THistones_propL2xvspropLpicL_H3incl_TMM | H3K9Me2S10Prop [prop_d0]     | 1      | 1097.6313 | 0.0e+0 |
| 20130708_293THistones_propL2xvspropLpicL_H3incl_TMM | H3K9Me2S10Prop [pic,prop_d0] | 1      | 1160.6422 | 0.0e+0 |
| 20130708_293THistones_propL2xvspropLpicL_H3incl_TMM | H3K9Me2S10Prop [prop_d0]     | 2      | 549.3193  | 2.1e+7 |
| 20130708_293THistones_propL2xvspropLpicL_H3incl_TMM | H3K9Me2S10Prop [pic,prop_d0] | 2      | 580.8248  | 0.0e+0 |
| 20130708_293THistones_propL2xvspropLpicL_H3incl_TMM | H3K9Me2S10Prop [prop_d0]     | 3      | 366.5486  | 0.0e+0 |
| 20130708_293THistones_propL2xvspropLpicL_H3incl_TMM | H3K9Me2S10Prop [pic,prop_d0] | 3      | 387.5523  | 0.0e+0 |

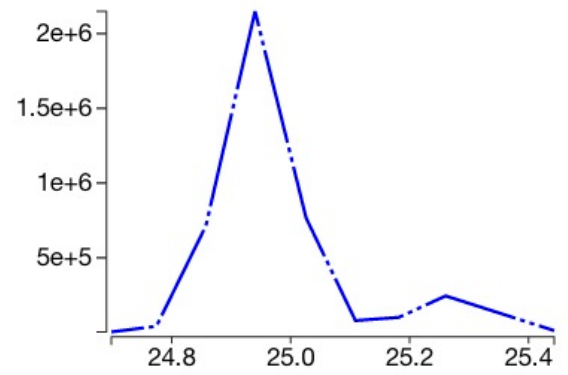

## Quanti event: 35.8-37.8min

| injection                                           | peptide                      | charge | m/z       | auc    |
|-----------------------------------------------------|------------------------------|--------|-----------|--------|
| 20130708_293THistones_propL2xvspropLpicL_H3incl_TMM | H3K9Me2S10Prop [prop_d0]     | 1      | 1097.6313 | 0.0e+0 |
| 20130708_293THistones_propL2xvspropLpicL_H3incl_TMM | H3K9Me2S10Prop [pic,prop_d0] | 1      | 1160.6422 | 0.0e+0 |
| 20130708_293THistones_propL2xvspropLpicL_H3incl_TMM | H3K9Me2S10Prop [prop_d0]     | 2      | 549.3193  | 0.0e+0 |
| 20130708_293THistones_propL2xvspropLpicL_H3incl_TMM | H3K9Me2S10Prop [pic,prop_d0] | 2      | 580.8248  | 1.7e+7 |
| 20130708_293THistones_propL2xvspropLpicL_H3incl_TMM | H3K9Me2S10Prop [prop_d0]     | 3      | 366.5486  | 0.0e+0 |
| 20130708_293THistones_propL2xvspropLpicL_H3incl_TMM | H3K9Me2S10Prop [pic,prop_d0] | 3      | 387.5523  | 0.0e+0 |

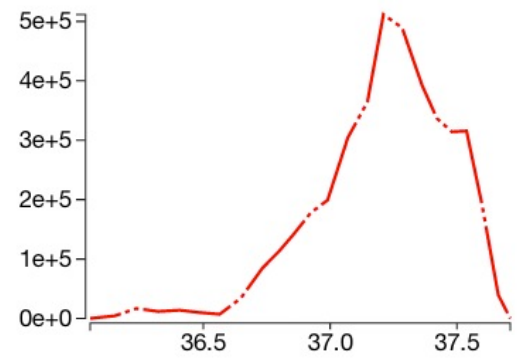

# H3\_K9-R17: Prop-KMe2SPropTGGKAPR MS/MS

### Experimental spectrum

scan 3327  
 retention time 24.9min  
 precursor m/z 549.3185  
 precursor charge 2+

### Theoretical

M H<sup>2+</sup> 549.3193  
 MH Δ<sub>mass</sub> Da -0.0015  
 MH Δ<sub>mass</sub> ppm -1.4

### edit peptide

{Propionyl}K{Dimethyl}S{Propionyl}TGGK{Propionyl}APR align

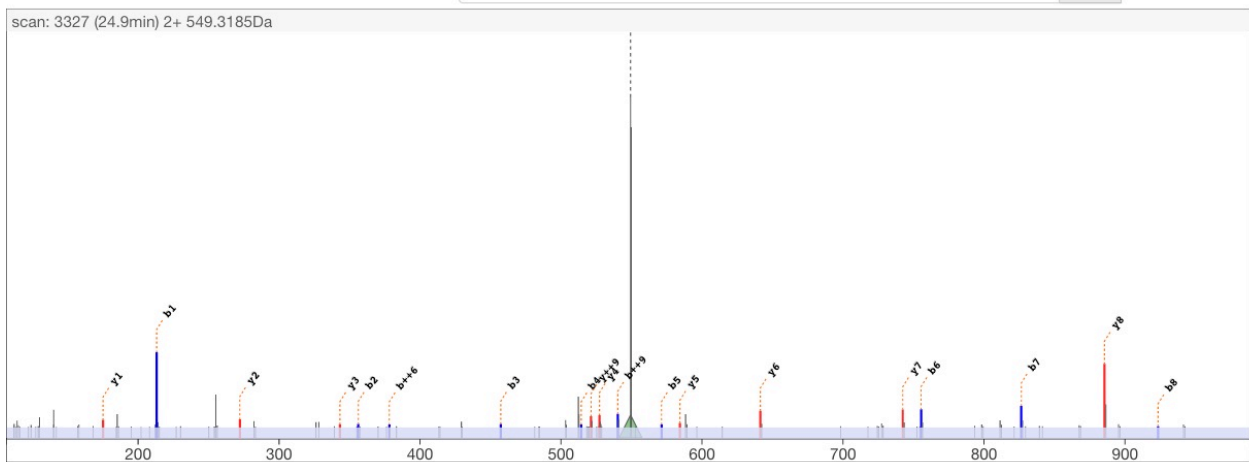

|   | b++    | b       |           | y       | y++    |   |
|---|--------|---------|-----------|---------|--------|---|
|   |        |         | Propionyl | 1041.61 | 521.31 | 9 |
| 1 | 107.08 | 213.16  | K         | 885.48  | 443.24 | 8 |
| 2 | 178.61 | 356.22  | S         | 742.42  | 371.71 | 7 |
| 3 | 229.14 | 457.27  | Propionyl | 641.37  | 321.19 | 6 |
| 4 | 257.65 | 514.29  | T         | 584.35  | 292.68 | 5 |
| 5 | 286.16 | 571.31  | G         | 527.33  | 264.17 | 4 |
| 6 | 378.22 | 755.43  | G         | 343.21  | 172.11 | 3 |
| 7 | 413.74 | 826.47  | Propionyl | 272.17  | 136.59 | 2 |
| 8 | 462.26 | 923.52  | K         | 175.12  | 88.06  | 1 |
| 9 | 540.31 | 1079.62 | A         |         |        |   |
|   |        |         | P         |         |        |   |
|   |        |         | R         |         |        |   |



# H3\_K9-R17: PIC-KMe2SPropTGGKAPR MS/MS

### Experimental spectrum

scan 5942  
 retention time 37.5min  
 precursor m/z 580.8226  
 precursor charge 2+

### Theoretical

MH<sup>2+</sup> 580.8248  
 MH  $\Delta$ <sub>mass</sub> Da -0.0042  
 MH  $\Delta$ <sub>mass</sub> ppm -3.7

### edit peptide

{PIC}K{Dimethyl}S{Propionyl}TGGK{Propionyl}APR align

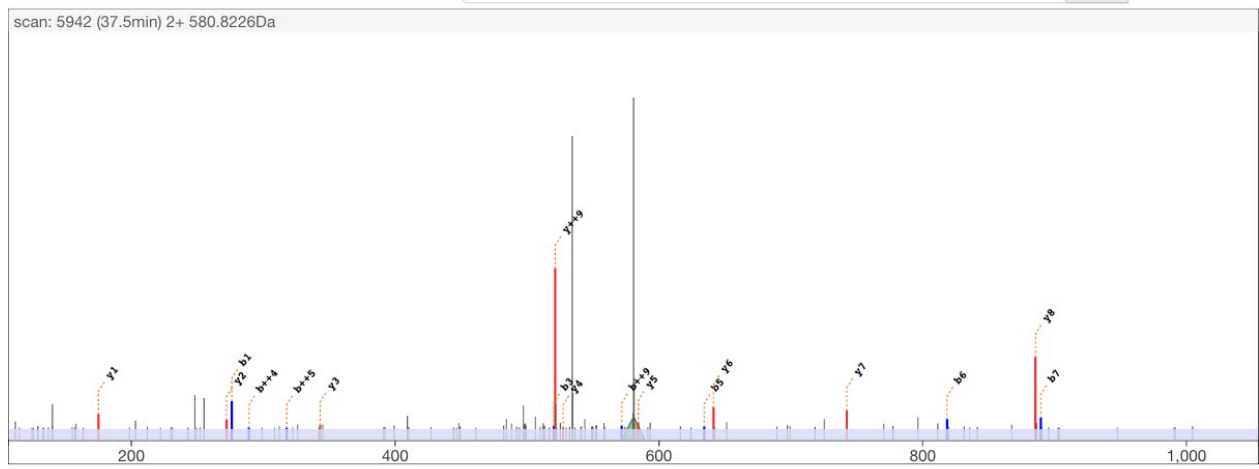

|   | b++    | b       |           | y       | y++    |   |
|---|--------|---------|-----------|---------|--------|---|
|   | 60.53  | 120.04  |           | 1041.61 | 521.31 | 9 |
| 1 | 138.59 | 276.17  | PIC       | 885.48  | 443.24 | 8 |
| 2 | 210.12 | 419.23  | K         | 742.42  | 371.71 | 7 |
| 3 | 260.64 | 520.28  | Dimethyl  | 641.37  | 321.19 | 6 |
| 4 | 289.15 | 577.30  | S         | 584.35  | 292.68 | 5 |
| 5 | 317.66 | 634.32  | T         | 527.33  | 264.17 | 4 |
| 6 | 409.72 | 818.44  | Propionyl | 343.21  | 172.11 | 3 |
| 7 | 445.24 | 889.48  | G         | 272.17  | 136.59 | 2 |
| 8 | 493.77 | 986.53  | K         | 175.12  | 88.06  | 1 |
| 9 | 571.82 | 1142.63 | Propionyl |         |        |   |

# H3\_K9-R17:

## KMe3STGGKAPR

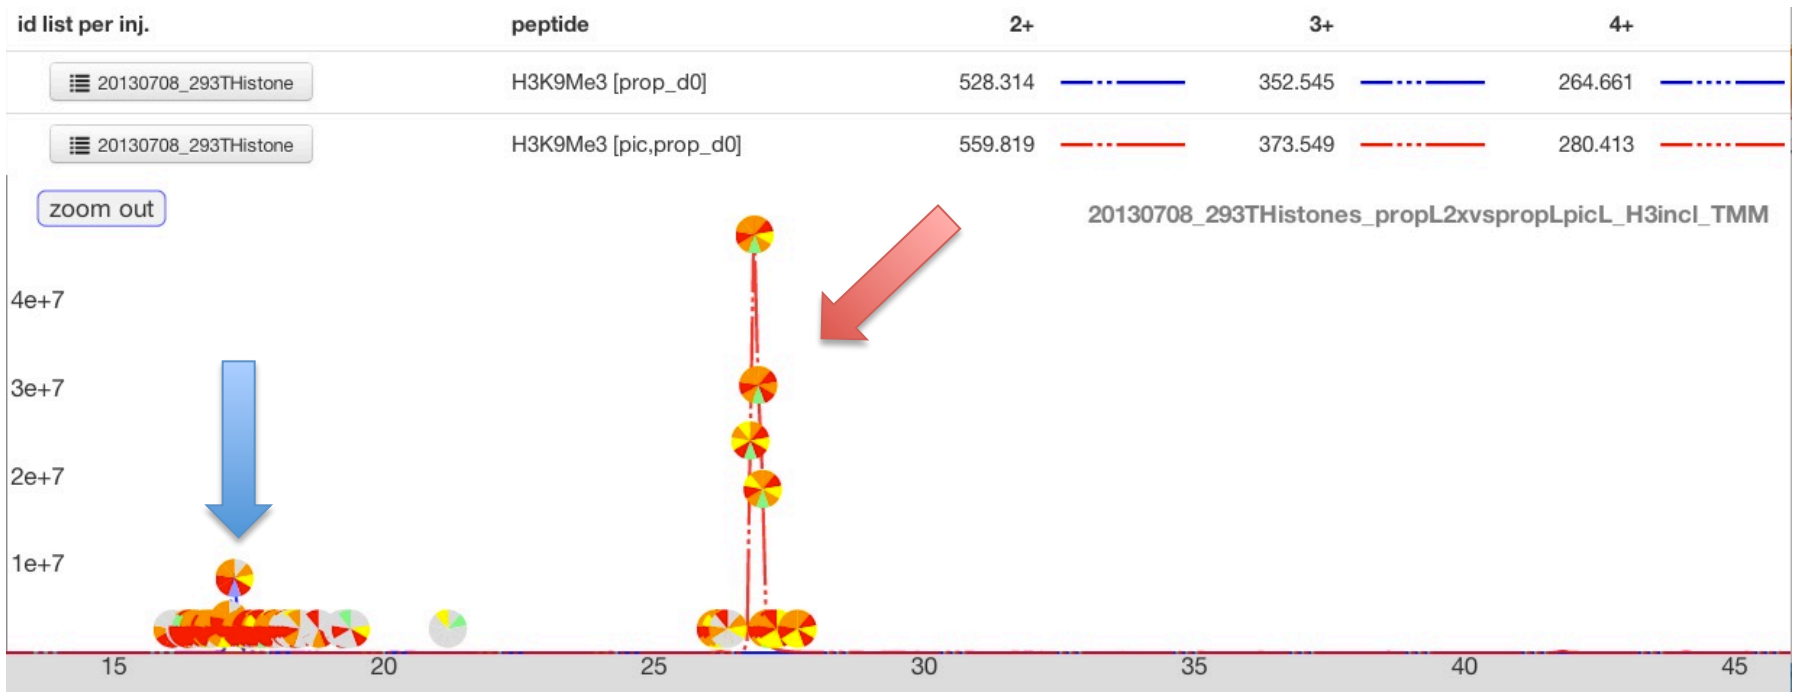

## Quanti event: 16.5-17.8min

| injection                                           | peptide               | charge | m/z      | auc    |
|-----------------------------------------------------|-----------------------|--------|----------|--------|
| 20130708_293THistones_propL2xvspropLpicL_H3incl_TMM | H3K9Me3 [prop_d0]     | 2      | 528.3140 | 8.7e+7 |
| 20130708_293THistones_propL2xvspropLpicL_H3incl_TMM | H3K9Me3 [pic,prop_d0] | 2      | 559.8195 | 0.0e+0 |
| 20130708_293THistones_propL2xvspropLpicL_H3incl_TMM | H3K9Me3 [prop_d0]     | 3      | 352.5451 | 0.0e+0 |
| 20130708_293THistones_propL2xvspropLpicL_H3incl_TMM | H3K9Me3 [pic,prop_d0] | 3      | 373.5487 | 0.0e+0 |
| 20130708_293THistones_propL2xvspropLpicL_H3incl_TMM | H3K9Me3 [prop_d0]     | 4      | 264.6607 | 0.0e+0 |
| 20130708_293THistones_propL2xvspropLpicL_H3incl_TMM | H3K9Me3 [pic,prop_d0] | 4      | 280.4134 | 0.0e+0 |

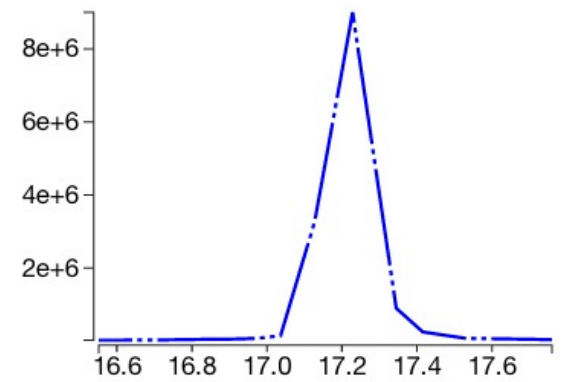

## Quanti event: 25.6-28.4min

| injection                                           | peptide               | charge | m/z      | auc    |
|-----------------------------------------------------|-----------------------|--------|----------|--------|
| 20130708_293THistones_propL2xvspropLpicL_H3incl_TMM | H3K9Me3 [prop_d0]     | 2      | 528.3140 | 0.0e+0 |
| 20130708_293THistones_propL2xvspropLpicL_H3incl_TMM | H3K9Me3 [pic,prop_d0] | 2      | 559.8195 | 5.7e+8 |
| 20130708_293THistones_propL2xvspropLpicL_H3incl_TMM | H3K9Me3 [prop_d0]     | 3      | 352.5451 | 0.0e+0 |
| 20130708_293THistones_propL2xvspropLpicL_H3incl_TMM | H3K9Me3 [pic,prop_d0] | 3      | 373.5487 | 0.0e+0 |
| 20130708_293THistones_propL2xvspropLpicL_H3incl_TMM | H3K9Me3 [prop_d0]     | 4      | 264.6607 | 0.0e+0 |
| 20130708_293THistones_propL2xvspropLpicL_H3incl_TMM | H3K9Me3 [pic,prop_d0] | 4      | 280.4134 | 0.0e+0 |

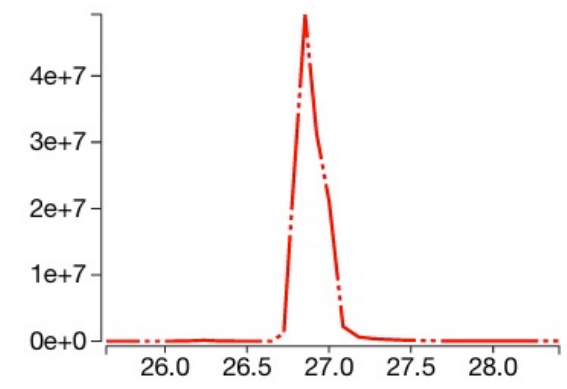

# H3\_K9-R17: Prop-KMe3STGGKAPR MS/MS

### Experimental spectrum

scan 2077  
 retention time 17.1min  
 precursor m/z 528.3135  
 precursor charge 2+

### Theoretical

M H<sup>2+</sup> 528.3140  
 MH Δ<sub>mass</sub> Da -0.0011  
 MH Δ<sub>mass</sub> ppm -1.0

### edit peptide

{Propionyl}K{Trimethyl}STGGK{Propionyl}APR align

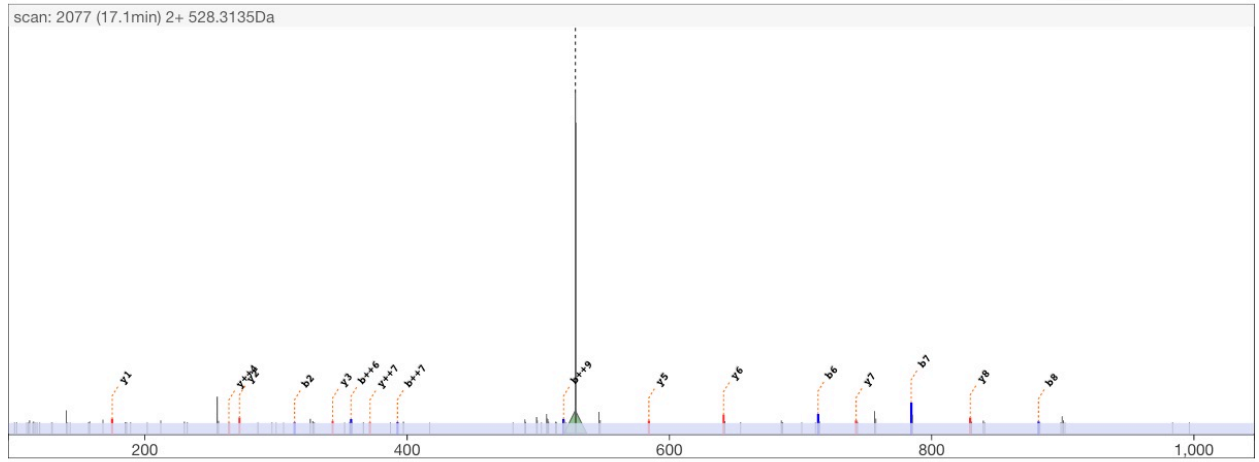

|   | b++    | b       | y      | y++    |   |
|---|--------|---------|--------|--------|---|
|   |        |         | 999.59 | 500.30 | 9 |
| 1 | 114.09 | 227.18  | 829.45 | 415.23 | 8 |
| 2 | 157.61 | 314.21  | 742.42 | 371.71 | 7 |
| 3 | 208.13 | 415.26  | 641.37 | 321.19 | 6 |
| 4 | 236.64 | 472.28  | 584.35 | 292.68 | 5 |
| 5 | 265.15 | 529.30  | 527.33 | 264.17 | 4 |
| 6 | 357.21 | 713.42  | 343.21 | 172.11 | 3 |
| 7 | 392.73 | 784.46  | 272.17 | 136.59 | 2 |
| 8 | 441.26 | 881.51  | 175.12 | 88.06  | 1 |
| 9 | 519.31 | 1037.61 |        |        |   |

**Experimental spectrum**

scan 3685  
 retention time 26.9min  
 precursor m/z 559.8192  
 precursor charge 2+

**Theoretical**

M H<sup>2+</sup> 559.8195  
 MH  $\Delta_{mass}$  Da -0.0005  
 MH  $\Delta_{mass}$  ppm -0.5

**edit peptide**

{PIC}K{Trimethyl}STGGK{Propionyl}APR align

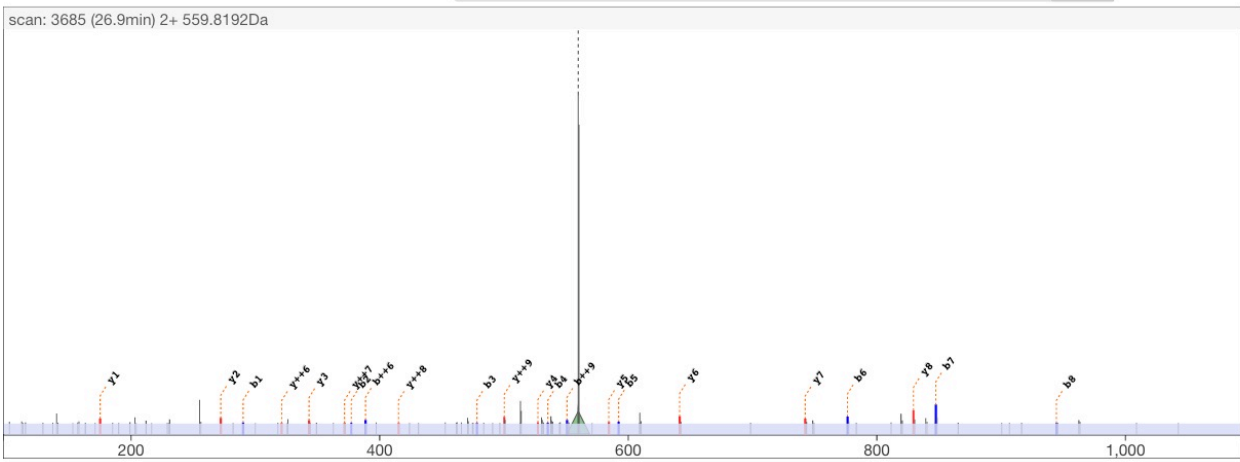

|   | b++    | b       |           | y      | y++    |   |
|---|--------|---------|-----------|--------|--------|---|
|   | 60.53  | 120.04  | PIC       | 999.59 | 500.30 | 9 |
| 1 | 145.60 | 290.19  | K         | 829.45 | 415.23 | 8 |
| 2 | 189.11 | 377.22  | S         | 742.42 | 371.71 | 7 |
| 3 | 239.64 | 478.27  | T         | 641.37 | 321.19 | 6 |
| 4 | 268.15 | 535.29  | G         | 584.35 | 292.68 | 5 |
| 5 | 296.66 | 592.31  | K         | 527.33 | 264.17 | 4 |
| 6 | 388.72 | 776.43  | Propionyl | 343.21 | 172.11 | 3 |
| 7 | 424.24 | 847.47  | A         | 272.17 | 136.59 | 2 |
| 8 | 472.76 | 944.52  | P         | 175.12 | 88.06  | 1 |
| 9 | 550.81 | 1100.62 | R         |        |        |   |

# H3\_K9-R17:

## KMe3SPoTGGKAPR

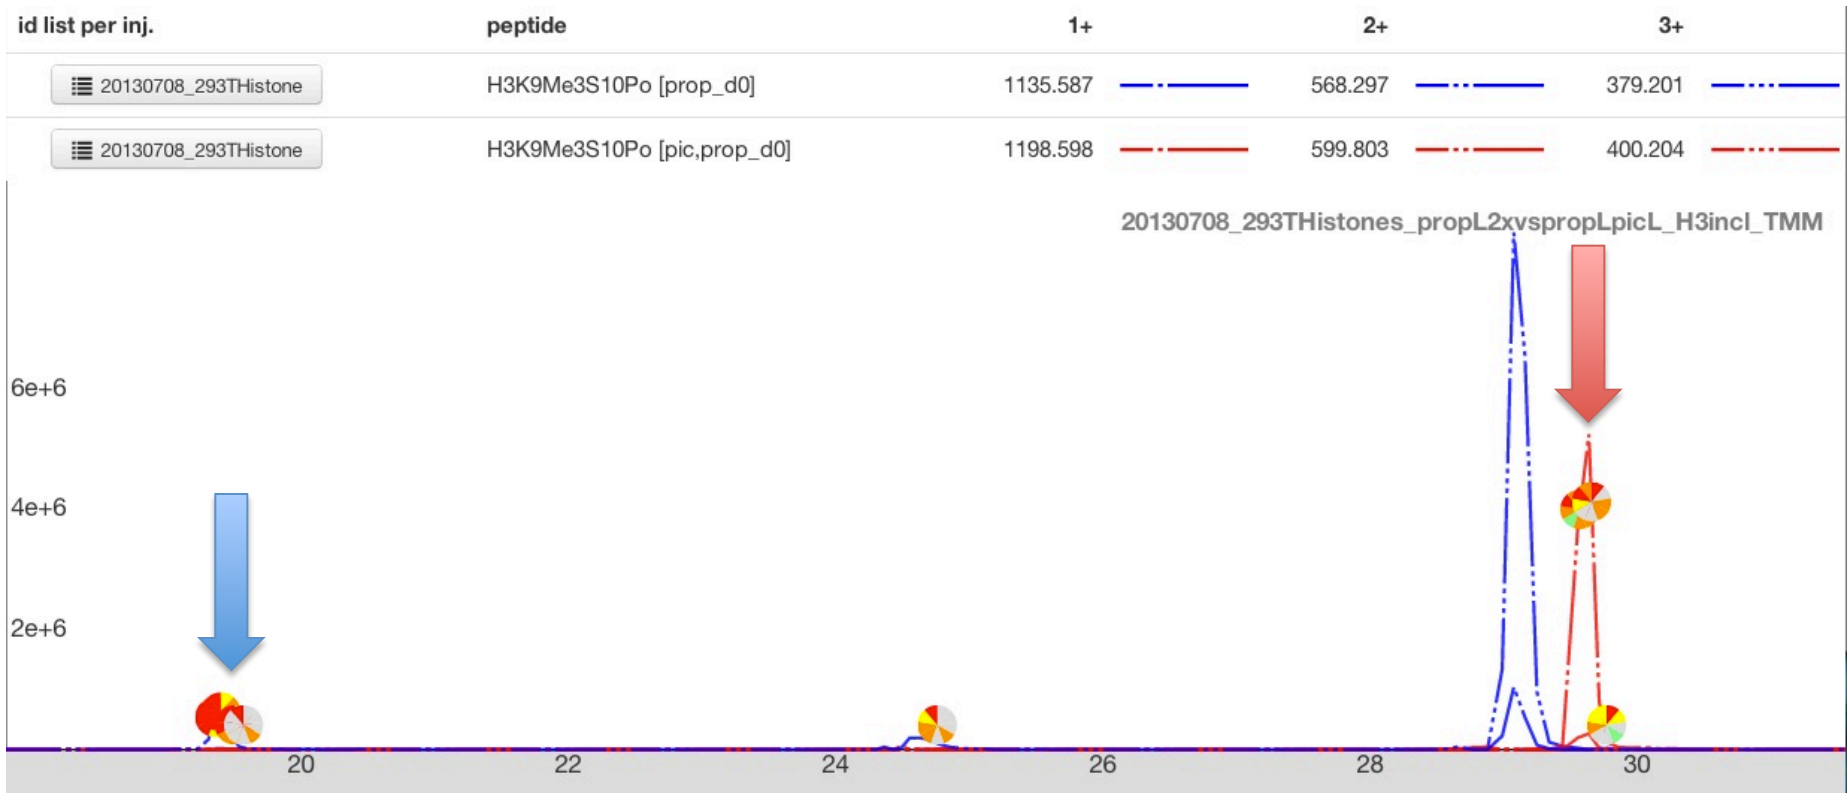

### Quanti event: 18.9-20.4min

| injection                                           | peptide                    | charge | m/z       | auc    |
|-----------------------------------------------------|----------------------------|--------|-----------|--------|
| 20130708_293THistones_propL2xvspropLpicL_H3incl_TMM | H3K9Me3S10Po [prop_d0]     | 1      | 1135.5871 | 0.0e+0 |
| 20130708_293THistones_propL2xvspropLpicL_H3incl_TMM | H3K9Me3S10Po [pic,prop_d0] | 1      | 1198.5980 | 0.0e+0 |
| 20130708_293THistones_propL2xvspropLpicL_H3incl_TMM | H3K9Me3S10Po [prop_d0]     | 2      | 568.2972  | 1.2e+6 |
| 20130708_293THistones_propL2xvspropLpicL_H3incl_TMM | H3K9Me3S10Po [pic,prop_d0] | 2      | 599.8026  | 0.0e+0 |
| 20130708_293THistones_propL2xvspropLpicL_H3incl_TMM | H3K9Me3S10Po [prop_d0]     | 3      | 379.2006  | 3.0e+4 |
| 20130708_293THistones_propL2xvspropLpicL_H3incl_TMM | H3K9Me3S10Po [pic,prop_d0] | 3      | 400.2042  | 9.7e+2 |

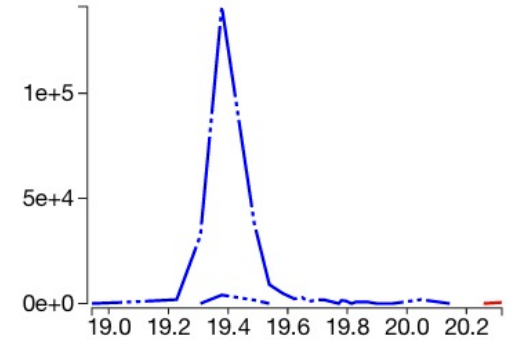

### Quanti event: 29.3-30.3min

| injection                                           | peptide                    | charge | m/z       | auc    |
|-----------------------------------------------------|----------------------------|--------|-----------|--------|
| 20130708_293THistones_propL2xvspropLpicL_H3incl_TMM | H3K9Me3S10Po [prop_d0]     | 1      | 1135.5871 | 0.0e+0 |
| 20130708_293THistones_propL2xvspropLpicL_H3incl_TMM | H3K9Me3S10Po [pic,prop_d0] | 1      | 1198.5980 | 0.0e+0 |
| 20130708_293THistones_propL2xvspropLpicL_H3incl_TMM | H3K9Me3S10Po [prop_d0]     | 2      | 568.2972  | 9.2e+3 |
| 20130708_293THistones_propL2xvspropLpicL_H3incl_TMM | H3K9Me3S10Po [pic,prop_d0] | 2      | 599.8026  | 1.0e+7 |
| 20130708_293THistones_propL2xvspropLpicL_H3incl_TMM | H3K9Me3S10Po [prop_d0]     | 3      | 379.2006  | 2.3e+5 |
| 20130708_293THistones_propL2xvspropLpicL_H3incl_TMM | H3K9Me3S10Po [pic,prop_d0] | 3      | 400.2042  | 4.9e+5 |

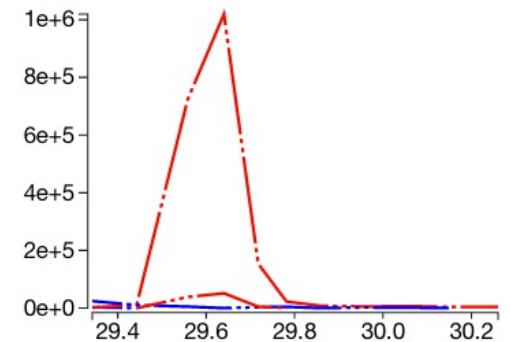

# H3\_K9-R17: Prop-KMe3SPoTGGKAPR MS/MS

### Experimental spectrum

scan 2415  
 retention time 19.4min  
 precursor m/z 568.2967  
 precursor charge 2+

### Theoretical

M H<sup>2+</sup> 568.2972  
 MH  $\Delta_{mass}$  Da -0.0010  
 MH  $\Delta_{mass}$  ppm -0.9

### edit peptide

{Propionyl}K{Trimethyl}S{Phospho}TGGK{Propionyl}APR align

precursor - H3PO4

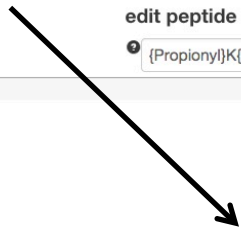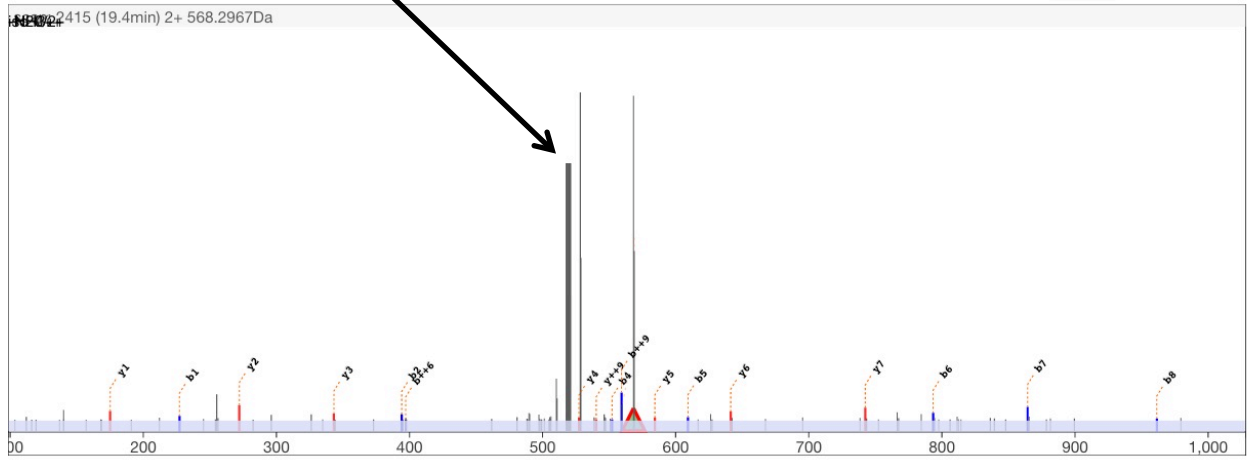

| Anchor        | Current         |
|---------------|-----------------|
| click on peak | mouse over peak |
| m/z 568.2967  | m/z 519.3082    |
| intensity NaN | intensity 26844 |
| int. rank     | int. rank 79    |

**Explanation?**  
 delta mass could be...  
 $\Delta_{m/z}$  -48.98853

**Tune the seq**  
 Align anchor peak

|   | b++    | b       | y       | y++    |   |
|---|--------|---------|---------|--------|---|
|   |        |         | 1079.56 | 540.28 | 9 |
| 1 | 114.09 | 227.18  | 909.42  | 455.21 | 8 |
| 2 | 197.59 | 394.17  | 742.42  | 371.71 | 7 |
| 3 | 248.11 | 495.22  | 641.37  | 321.19 | 6 |
| 4 | 276.63 | 552.24  | 584.35  | 292.68 | 5 |
| 5 | 305.14 | 609.26  | 527.33  | 264.17 | 4 |
| 6 | 397.20 | 793.39  | 343.21  | 172.11 | 3 |
| 7 | 432.71 | 864.42  | 272.17  | 136.59 | 2 |
| 8 | 481.24 | 961.48  | 175.12  | 88.06  | 1 |
| 9 | 559.29 | 1117.58 |         |        |   |



### Experimental spectrum

scan 4102  
 retention time 29.6min  
 precursor m/z 599.8026  
 precursor charge 2+

### Theoretical

M H<sup>2+</sup> 599.8026  
 MH Δ<sub>mass</sub> Da -0.0002  
 MH Δ<sub>mass</sub> ppm -0.1

### edit peptide

{PIC}K[Trimethyl]S[Phospho]TGGK[Propionyl]APR align

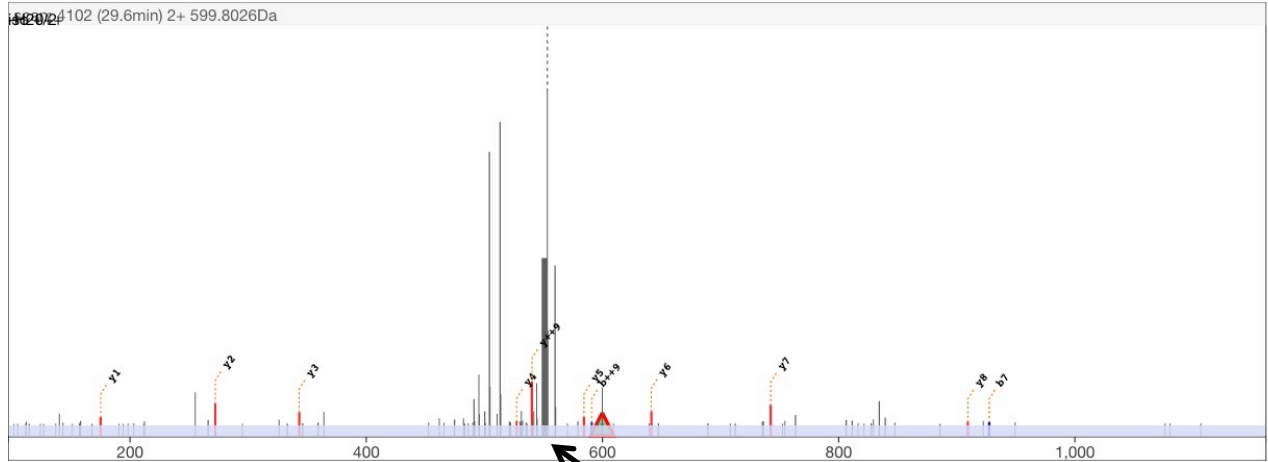

**Anchor**  
 click on peak  
 m/z 599.8026  
 intensity NaN  
 int. rank

**Current**  
 mouse over peak  
 m/z 550.8129  
 intensity 60500  
 int. rank 93

**Explanation?**  
 delta mass could be...  
 Δ<sub>m/z</sub> -48.98969

precursor – H3PO4

**Tune the seq**  
 Align anchor peak  
 b2,y3,y5++  
 match

|   | b++    | b       |                | y       | y++    |   |
|---|--------|---------|----------------|---------|--------|---|
|   | 60.53  | 120.04  | PIC            | 1079.56 | 540.28 | 9 |
| 1 | 145.60 | 290.19  | K<br>Trimethyl | 909.42  | 455.21 | 8 |
| 2 | 229.10 | 457.18  | S<br>Phospho   | 742.42  | 371.71 | 7 |
| 3 | 279.62 | 558.23  | T              | 641.37  | 321.19 | 6 |
| 4 | 308.13 | 615.25  | G              | 584.35  | 292.68 | 5 |
| 5 | 336.64 | 672.28  | G              | 527.33  | 264.17 | 4 |
| 6 | 428.70 | 856.40  | K<br>Propionyl | 343.21  | 172.11 | 3 |
| 7 | 464.22 | 927.43  | A              | 272.17  | 136.59 | 2 |
| 8 | 512.75 | 1024.49 | P              | 175.12  | 88.06  | 1 |
| 9 | 590.80 | 1180.59 | R              |         |        |   |

# H3\_K9-R17:

## KMe3STPropGGKAPR

T11 seems to be the favourite spot for propionylation on this peptide

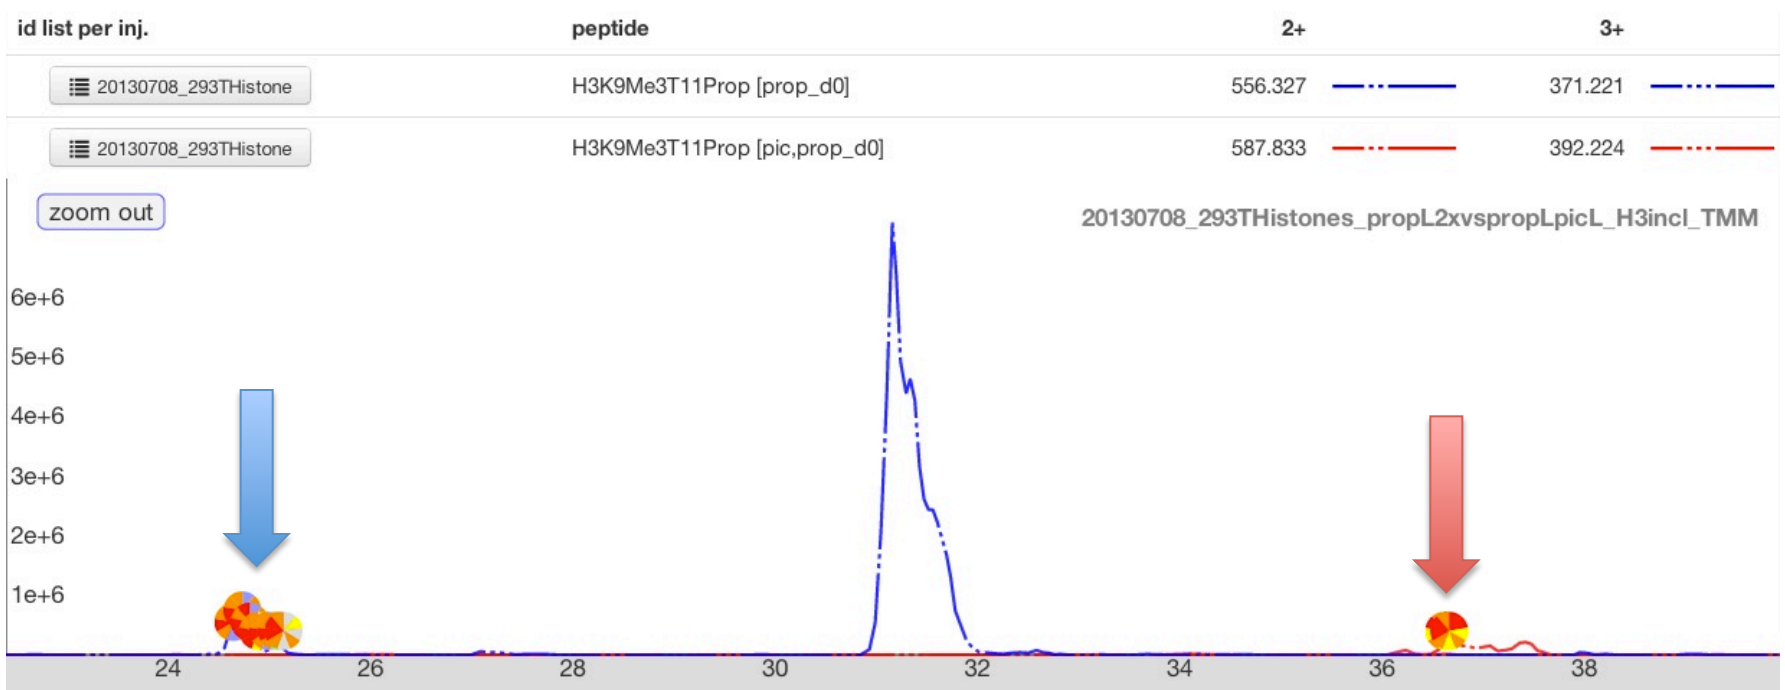

## Quanti event: 24.3-25.5min

| injection                                           | peptide                      | charge | m/z      | auc    |
|-----------------------------------------------------|------------------------------|--------|----------|--------|
| 20130708_293THistones_propL2xvspropLpicL_H3incl_TMM | H3K9Me3T11Prop [prop_d0]     | 2      | 556.3271 | 1.3e+7 |
| 20130708_293THistones_propL2xvspropLpicL_H3incl_TMM | H3K9Me3T11Prop [pic,prop_d0] | 2      | 587.8326 | 0.0e+0 |
| 20130708_293THistones_propL2xvspropLpicL_H3incl_TMM | H3K9Me3T11Prop [prop_d0]     | 3      | 371.2205 | 0.0e+0 |
| 20130708_293THistones_propL2xvspropLpicL_H3incl_TMM | H3K9Me3T11Prop [pic,prop_d0] | 3      | 392.2241 | 0.0e+0 |

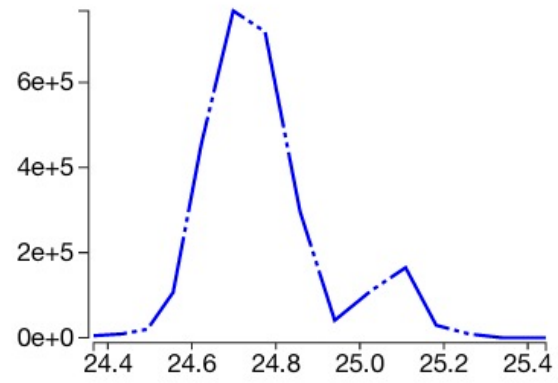

## Quanti event: 36.0-37.7min

| injection                                           | peptide                      | charge | m/z      | auc    |
|-----------------------------------------------------|------------------------------|--------|----------|--------|
| 20130708_293THistones_propL2xvspropLpicL_H3incl_TMM | H3K9Me3T11Prop [prop_d0]     | 2      | 556.3271 | 0.0e+0 |
| 20130708_293THistones_propL2xvspropLpicL_H3incl_TMM | H3K9Me3T11Prop [pic,prop_d0] | 2      | 587.8326 | 1.0e+7 |
| 20130708_293THistones_propL2xvspropLpicL_H3incl_TMM | H3K9Me3T11Prop [prop_d0]     | 3      | 371.2205 | 0.0e+0 |
| 20130708_293THistones_propL2xvspropLpicL_H3incl_TMM | H3K9Me3T11Prop [pic,prop_d0] | 3      | 392.2241 | 8.8e+4 |

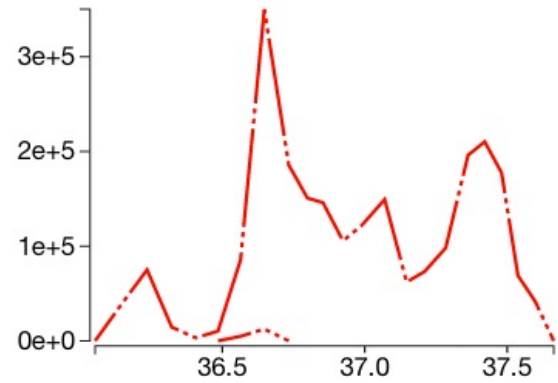

# H3\_K9-R17: Prop-KMe3SPropTGGKAPR MS/MS

### Experimental spectrum

scan 3297  
 retention time 24.7min  
 precursor m/z 556.3253  
 precursor charge 2+

### Theoretical

M H<sup>2+</sup> 556.3271  
 MH  $\Delta_{mass}$  Da -0.0037  
 MH  $\Delta_{mass}$  ppm -3.4

### edit peptide

{Propionyl}K{Trimethyl}S{Propionyl}TGGK{Propionyl}APR align

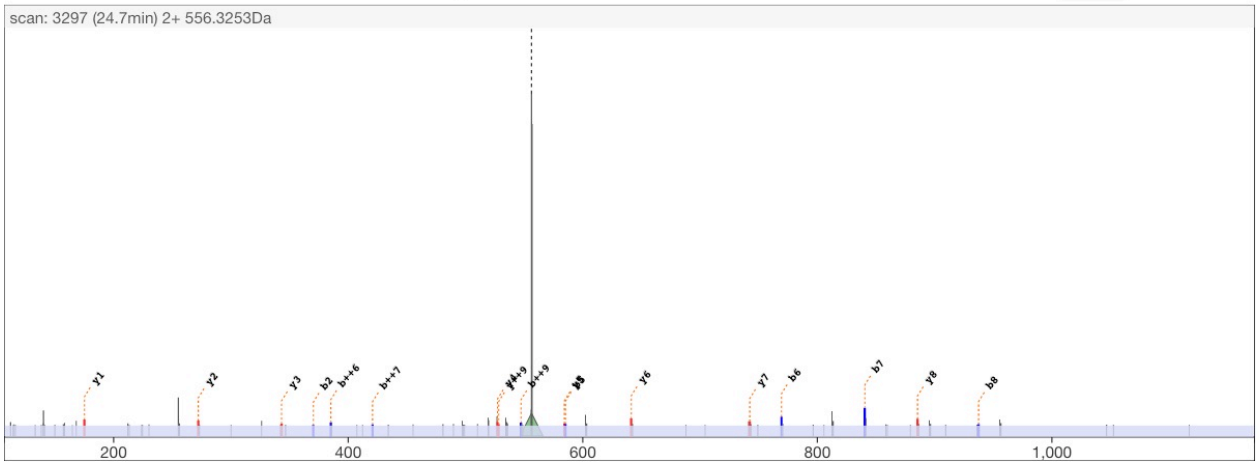

|   | b++    | b       |           | y       | y++    |   |
|---|--------|---------|-----------|---------|--------|---|
|   |        |         | Propionyl | 1055.62 | 528.31 | 9 |
| 1 | 114.09 | 227.18  | K         |         |        |   |
|   |        |         | Trimethyl | 885.48  | 443.24 | 8 |
| 2 | 185.62 | 370.23  | S         |         |        |   |
|   |        |         | Propionyl | 742.42  | 371.71 | 7 |
| 3 | 236.14 | 471.28  | T         |         |        |   |
| 4 | 264.66 | 528.30  | G         |         |        |   |
| 5 | 293.17 | 585.32  | G         |         |        |   |
| 6 | 385.23 | 769.45  | K         |         |        |   |
|   |        |         | Propionyl | 343.21  | 172.11 | 3 |
| 7 | 420.74 | 840.48  | A         |         |        |   |
| 8 | 469.27 | 937.54  | P         |         |        |   |
| 9 | 547.32 | 1093.64 | R         |         |        |   |

# H3\_K9-R17: PIC-KMe3SPropTGGKAPR MS/MS

### Experimental spectrum

scan 5749  
 retention time 36.7min  
 precursor m/z 587.8326  
 precursor charge 2+

### Theoretical

M H<sup>2+</sup> 587.8326  
 MH Δ<sub>mass</sub> Da 0.0001  
 MH Δ<sub>mass</sub> ppm 0.1

### edit peptide

{PIC}K{Trimethyl}S{Propionyl}TGGK{Propionyl}APR

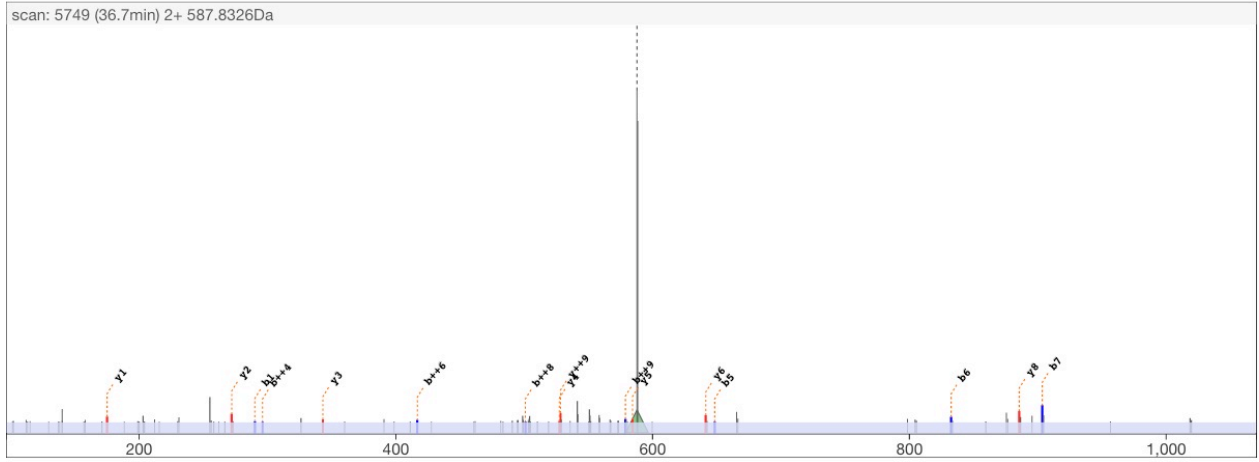

|   | b++    | b       |     | y       | y++    |   |
|---|--------|---------|-----|---------|--------|---|
|   | 60.53  | 120.04  | PIC | 1055.62 | 528.31 | 9 |
| 1 | 145.60 | 290.19  | K   | 885.48  | 443.24 | 8 |
| 2 | 217.13 | 433.24  | S   | 742.42  | 371.71 | 7 |
| 3 | 267.65 | 534.29  | T   | 641.37  | 321.19 | 6 |
| 4 | 296.16 | 591.31  | G   | 584.35  | 292.68 | 5 |
| 5 | 324.67 | 648.34  | G   | 527.33  | 264.17 | 4 |
| 6 | 416.73 | 832.46  | K   | 343.21  | 172.11 | 3 |
| 7 | 452.25 | 903.49  | A   | 272.17  | 136.59 | 2 |
| 8 | 500.78 | 1000.55 | P   | 175.12  | 88.06  | 1 |
| 9 | 578.83 | 1156.65 | R   |         |        |   |

# H3\_K9-R17: KAcSTGGKAPR

Double-peak of K9ac and K14ac, K9ac elutes earlier from C18 column

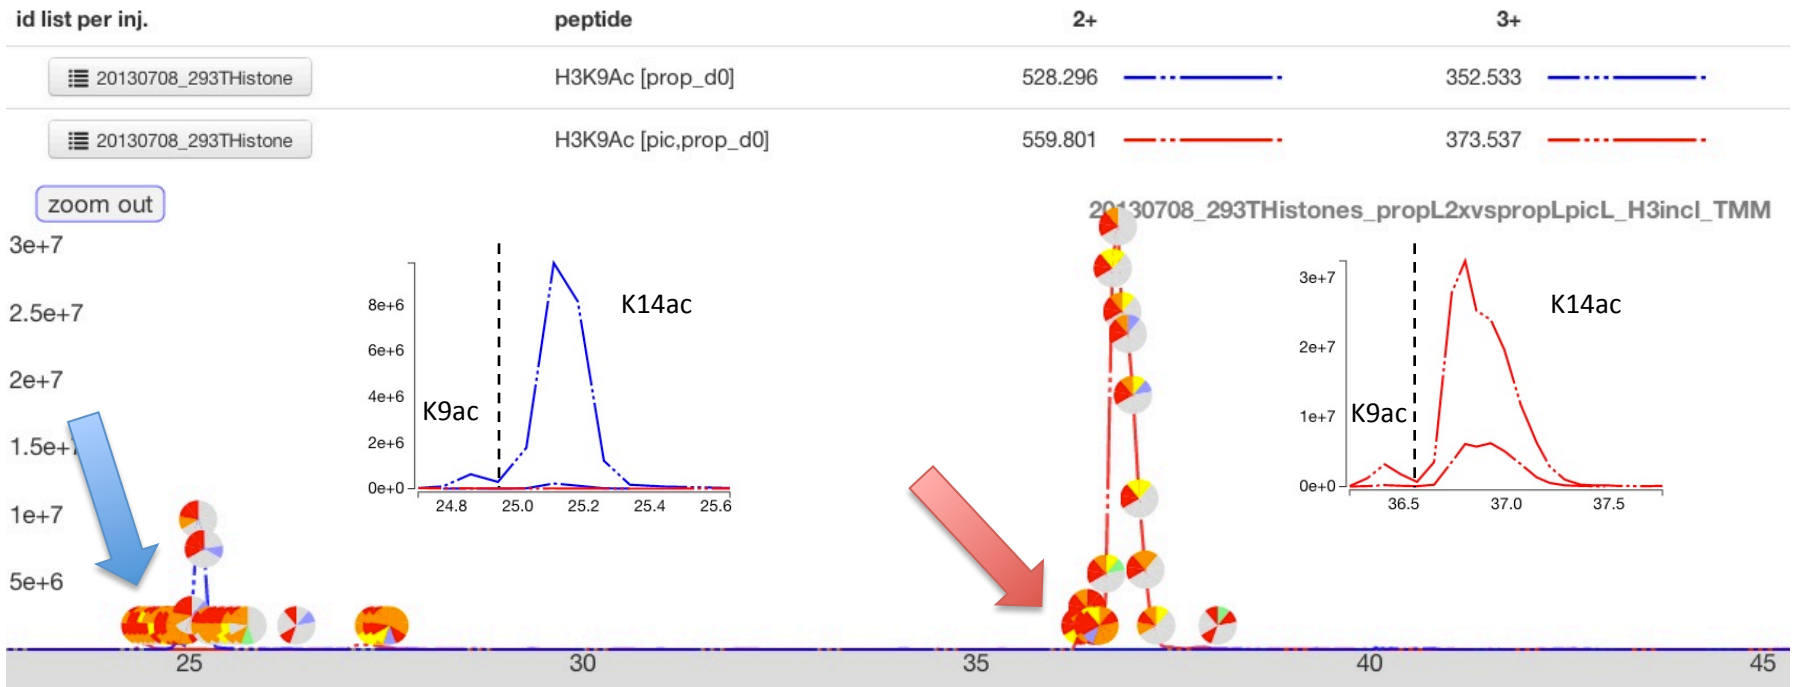

## Quanti event: 24.7-25.0min

| injection                                           | peptide              | charge | m/z       | auc    |
|-----------------------------------------------------|----------------------|--------|-----------|--------|
| 20130708_293THistones_propL2xvspropLpicL_H3incl_TMM | H3K9Ac [prop_d0]     | 1      | 1055.5844 | 3.0e+4 |
| 20130708_293THistones_propL2xvspropLpicL_H3incl_TMM | H3K9Ac [pic,prop_d0] | 1      | 1118.5953 | 0.0e+0 |
| 20130708_293THistones_propL2xvspropLpicL_H3incl_TMM | H3K9Ac [prop_d0]     | 2      | 528.2958  | 4.4e+6 |
| 20130708_293THistones_propL2xvspropLpicL_H3incl_TMM | H3K9Ac [pic,prop_d0] | 2      | 559.8013  | 2.2e+5 |
| 20130708_293THistones_propL2xvspropLpicL_H3incl_TMM | H3K9Ac [prop_d0]     | 3      | 352.5330  | 0.0e+0 |
| 20130708_293THistones_propL2xvspropLpicL_H3incl_TMM | H3K9Ac [pic,prop_d0] | 3      | 373.5366  | 0.0e+0 |

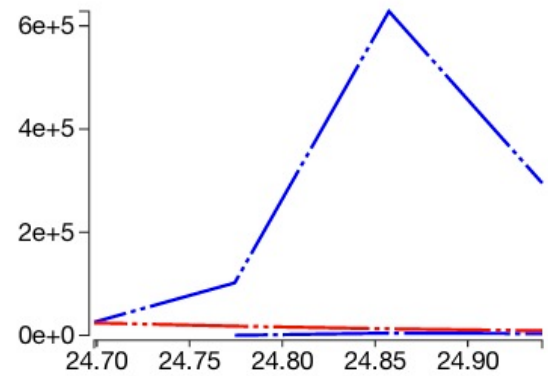

## Quanti event: 36.2-36.6min

| injection                                           | peptide              | charge | m/z       | auc    |
|-----------------------------------------------------|----------------------|--------|-----------|--------|
| 20130708_293THistones_propL2xvspropLpicL_H3incl_TMM | H3K9Ac [prop_d0]     | 1      | 1055.5844 | 0.0e+0 |
| 20130708_293THistones_propL2xvspropLpicL_H3incl_TMM | H3K9Ac [pic,prop_d0] | 1      | 1118.5953 | 2.1e+6 |
| 20130708_293THistones_propL2xvspropLpicL_H3incl_TMM | H3K9Ac [prop_d0]     | 2      | 528.2958  | 0.0e+0 |
| 20130708_293THistones_propL2xvspropLpicL_H3incl_TMM | H3K9Ac [pic,prop_d0] | 2      | 559.8013  | 3.2e+7 |
| 20130708_293THistones_propL2xvspropLpicL_H3incl_TMM | H3K9Ac [prop_d0]     | 3      | 352.5330  | 0.0e+0 |
| 20130708_293THistones_propL2xvspropLpicL_H3incl_TMM | H3K9Ac [pic,prop_d0] | 3      | 373.5366  | 0.0e+0 |

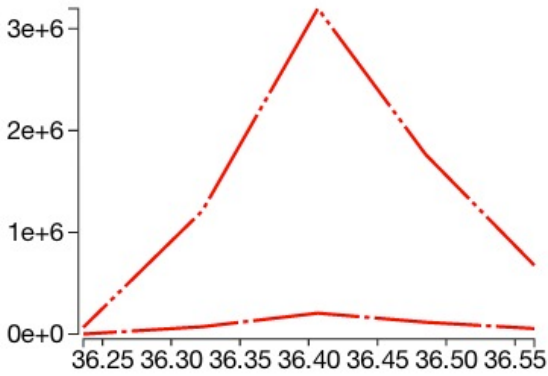

**Experimental spectrum**

scan 3309  
 retention time 24.8min  
 precursor m/z 528.2959  
 precursor charge 2+

**Theoretical**

M H<sup>2+</sup> 528.2958  
 MH Δ<sub>mass</sub> Da 0.0001  
 MH Δ<sub>mass</sub> ppm 0.1

**edit peptide**

{Propionyl}K{Acetyl}STGGK{Propionyl}APR align

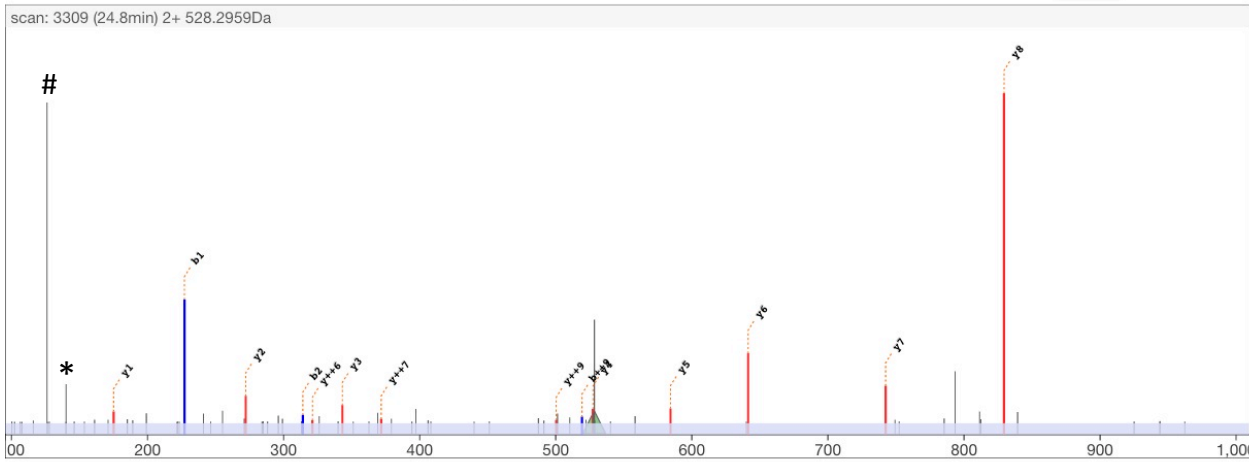

|   | b++    | b       |           | y      | y++    |   |
|---|--------|---------|-----------|--------|--------|---|
|   |        |         | Propionyl | 999.56 | 500.28 | 9 |
| 1 | 114.07 | 227.14  | K         | 829.45 | 415.23 | 8 |
| 2 | 157.59 | 314.17  | S         | 742.42 | 371.71 | 7 |
| 3 | 208.11 | 415.22  | T         | 641.37 | 321.19 | 6 |
| 4 | 236.62 | 472.24  | G         | 584.35 | 292.68 | 5 |
| 5 | 265.13 | 529.26  | G         | 527.33 | 264.17 | 4 |
| 6 | 357.20 | 713.38  | K         | 343.21 | 172.11 | 3 |
| 7 | 392.71 | 784.42  | A         | 272.17 | 136.59 | 2 |
| 8 | 441.24 | 881.47  | P         | 175.12 | 88.06  | 1 |
| 9 | 519.29 | 1037.57 | R         |        |        |   |

\* = 140Da diagnostic ion  
 # = 126Da diagnostic ion



**Experimental spectrum**

scan 5714  
 retention time 36.5min  
 precursor m/z 559.8009  
 precursor charge 2+

**Theoretical**

M H<sup>2+</sup> 559.8013  
 MH Δ<sub>mass</sub> Da -0.0008  
 MH Δ<sub>mass</sub> ppm -0.7

**edit peptide**

{PIC}K{Acetyl}STGGK{Propionyl}APR

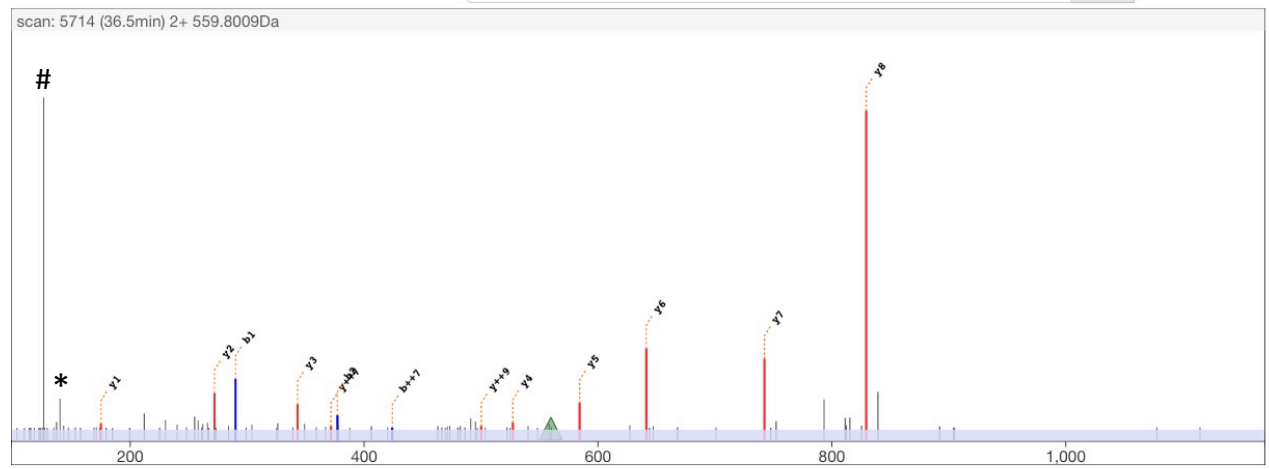

|   | b++    | b       |           | y      | y++    |   |
|---|--------|---------|-----------|--------|--------|---|
|   | 60.53  | 120.04  | PIC       | 999.56 | 500.28 | 9 |
| 1 | 145.58 | 290.15  | K         | 829.45 | 415.23 | 8 |
| 2 | 189.09 | 377.18  | Acetyl    | 742.42 | 371.71 | 7 |
| 3 | 239.62 | 478.23  | S         | 641.37 | 321.19 | 6 |
| 4 | 268.13 | 535.25  | T         | 584.35 | 292.68 | 5 |
| 5 | 296.64 | 592.27  | G         | 527.33 | 264.17 | 4 |
| 6 | 388.70 | 776.39  | K         | 343.21 | 172.11 | 3 |
| 7 | 424.22 | 847.43  | Propionyl | 272.17 | 136.59 | 2 |
| 8 | 472.75 | 944.48  | A         | 175.12 | 88.06  | 1 |
| 9 | 550.80 | 1100.58 | P         |        |        |   |
|   |        |         | R         |        |        |   |

\* = 140Da diagnostic ion  
 # = 126Da diagnostic ion

# H3\_K9-R17: KSTGGKAcAPR

| id list per inj.     | peptide               | 2+      | 3+      |
|----------------------|-----------------------|---------|---------|
| 20130708_293THistone | H3K14Ac [prop_d0]     | 528.296 | 352.533 |
| 20130708_293THistone | H3K14Ac [pic,prop_d0] | 559.801 | 373.537 |

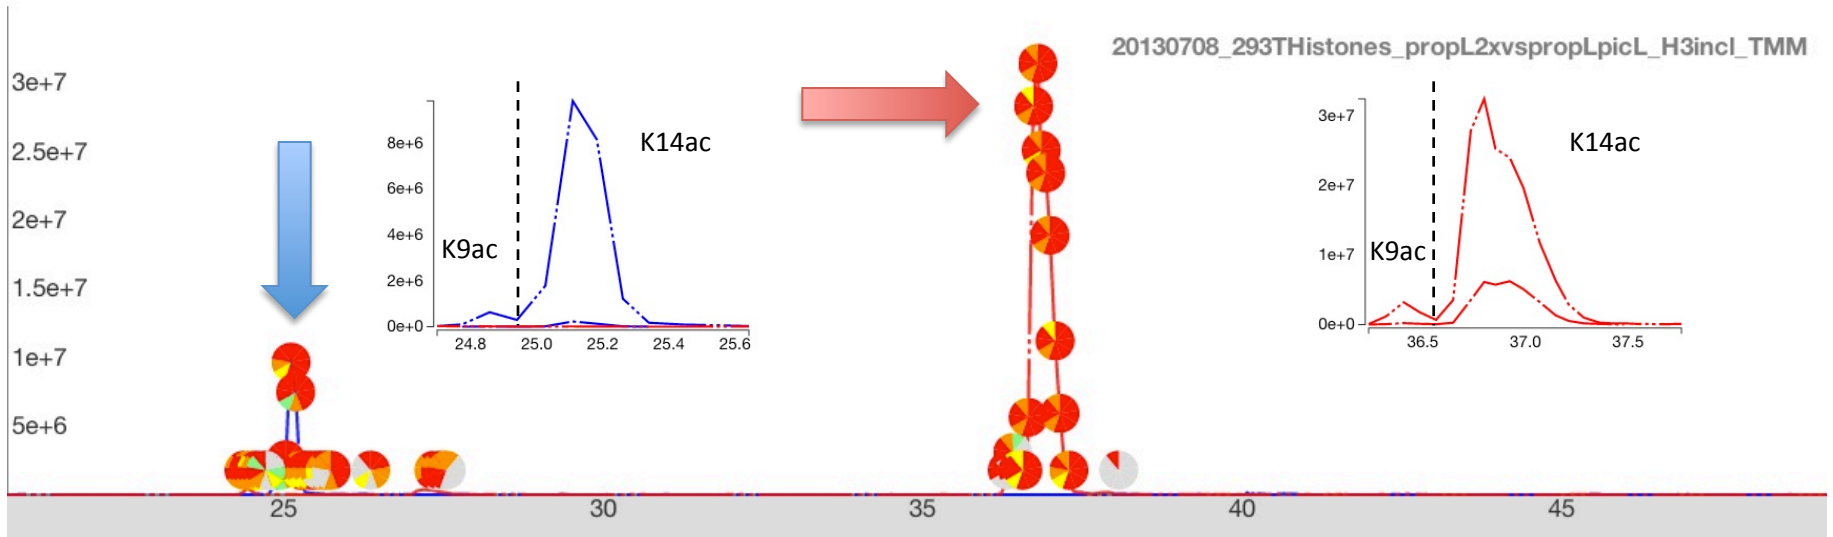

Quanti event: 24.9-25.7min

| injection                                           | peptide               | charge | m/z       | auc    |
|-----------------------------------------------------|-----------------------|--------|-----------|--------|
| 20130708_293THistones_propL2xvspropLpicL_H3incl_TMM | H3K14Ac [prop_d0]     | 1      | 1055.5844 | 1.8e+6 |
| 20130708_293THistones_propL2xvspropLpicL_H3incl_TMM | H3K14Ac [pic,prop_d0] | 1      | 1118.5953 | 0.0e+0 |
| 20130708_293THistones_propL2xvspropLpicL_H3incl_TMM | H3K14Ac [prop_d0]     | 2      | 528.2958  | 9.5e+7 |
| 20130708_293THistones_propL2xvspropLpicL_H3incl_TMM | H3K14Ac [pic,prop_d0] | 2      | 559.8013  | 1.3e+5 |
| 20130708_293THistones_propL2xvspropLpicL_H3incl_TMM | H3K14Ac [prop_d0]     | 3      | 352.5330  | 0.0e+0 |
| 20130708_293THistones_propL2xvspropLpicL_H3incl_TMM | H3K14Ac [pic,prop_d0] | 3      | 373.5366  | 0.0e+0 |

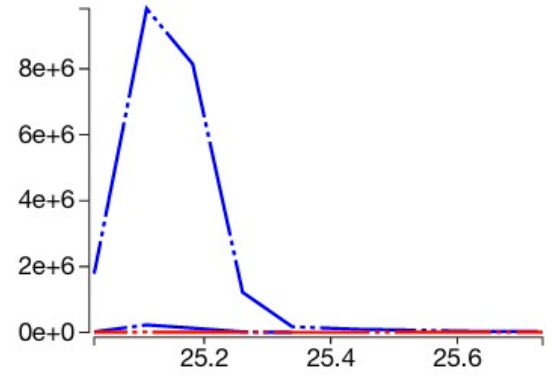

Quanti event: 36.6-37.6min

| injection                                           | peptide               | charge | m/z       | auc    |
|-----------------------------------------------------|-----------------------|--------|-----------|--------|
| 20130708_293THistones_propL2xvspropLpicL_H3incl_TMM | H3K14Ac [prop_d0]     | 1      | 1055.5844 | 0.0e+0 |
| 20130708_293THistones_propL2xvspropLpicL_H3incl_TMM | H3K14Ac [pic,prop_d0] | 1      | 1118.5953 | 1.3e+8 |
| 20130708_293THistones_propL2xvspropLpicL_H3incl_TMM | H3K14Ac [prop_d0]     | 2      | 528.2958  | 0.0e+0 |
| 20130708_293THistones_propL2xvspropLpicL_H3incl_TMM | H3K14Ac [pic,prop_d0] | 2      | 559.8013  | 6.3e+8 |
| 20130708_293THistones_propL2xvspropLpicL_H3incl_TMM | H3K14Ac [prop_d0]     | 3      | 352.5330  | 0.0e+0 |
| 20130708_293THistones_propL2xvspropLpicL_H3incl_TMM | H3K14Ac [pic,prop_d0] | 3      | 373.5366  | 0.0e+0 |

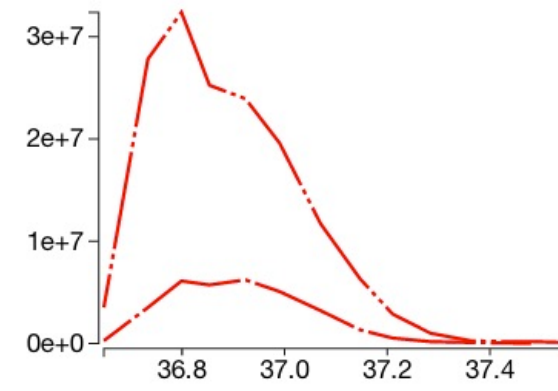

**Experimental spectrum**

scan 3354  
 retention time 25.0min  
 precursor m/z 528.2961  
 precursor charge 2+

**Theoretical**

M H<sup>2+</sup> 528.2958  
 MH Δ<sub>mass</sub> Da 0.0005  
 MH Δ<sub>mass</sub> ppm 0.5

**edit peptide**

{Propionyl}K{Propionyl}STGGK{Acetyl}APR align

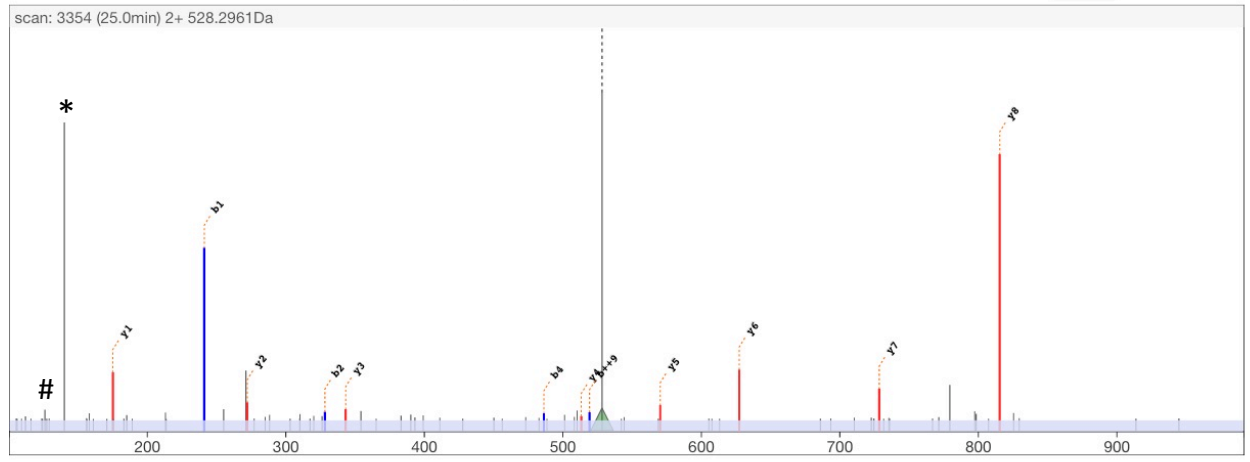

|   | b++    | b       | y      | y++    |   |
|---|--------|---------|--------|--------|---|
|   |        |         | 999.56 | 500.28 | 9 |
| 1 | 121.08 | 241.15  | 815.44 | 408.22 | 8 |
| 2 | 164.60 | 328.19  | 728.40 | 364.71 | 7 |
| 3 | 215.12 | 429.23  | 627.36 | 314.18 | 6 |
| 4 | 243.63 | 486.26  | 570.34 | 285.67 | 5 |
| 5 | 272.14 | 543.28  | 513.31 | 257.16 | 4 |
| 6 | 357.20 | 713.38  | 343.21 | 172.11 | 3 |
| 7 | 392.71 | 784.42  | 272.17 | 136.59 | 2 |
| 8 | 441.24 | 881.47  | 175.12 | 88.06  | 1 |
| 9 | 519.29 | 1037.57 |        |        |   |

\* = 140Da diagnostic ion  
 # = 126Da diagnostic ion

### Experimental spectrum

scan 5746  
 retention time 36.7min  
 precursor m/z 559.8015  
 precursor charge 2+

### Theoretical

M H<sup>2+</sup> 559.8013  
 MH Δ<sub>mass</sub> Da 0.0005  
 MH Δ<sub>mass</sub> ppm 0.4

### edit peptide

{PIC}K{Propionyl}STGGK{Acetyl}APR align

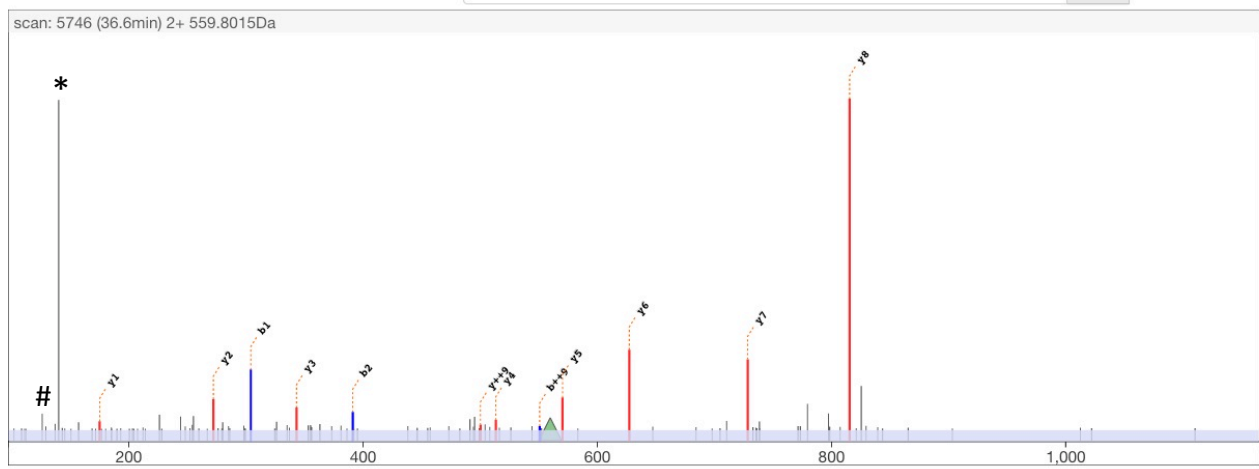

|   | b++    | b       |           | y      | y++    |   |
|---|--------|---------|-----------|--------|--------|---|
|   | 60.53  | 120.04  | PIC       | 999.56 | 500.28 | 9 |
| 1 | 152.59 | 304.17  | K         | 815.44 | 408.22 | 8 |
| 2 | 196.10 | 391.20  | Propionyl | 728.40 | 364.71 | 7 |
| 3 | 246.63 | 492.25  | S         | 627.36 | 314.18 | 6 |
| 4 | 275.14 | 549.27  | T         | 570.34 | 285.67 | 5 |
| 5 | 303.65 | 606.29  | G         | 513.31 | 257.16 | 4 |
| 6 | 388.70 | 776.39  | K         | 343.21 | 172.11 | 3 |
| 7 | 424.22 | 847.43  | Acetyl    | 272.17 | 136.59 | 2 |
| 8 | 472.75 | 944.48  | A         | 175.12 | 88.06  | 1 |
| 9 | 550.80 | 1100.58 | P         |        |        |   |
|   |        |         | R         |        |        |   |

\* = 140Da diagnostic ion  
 # = 126Da diagnostic ion

# H3\_K9-R17:

## KSPoTGGKAcAPR

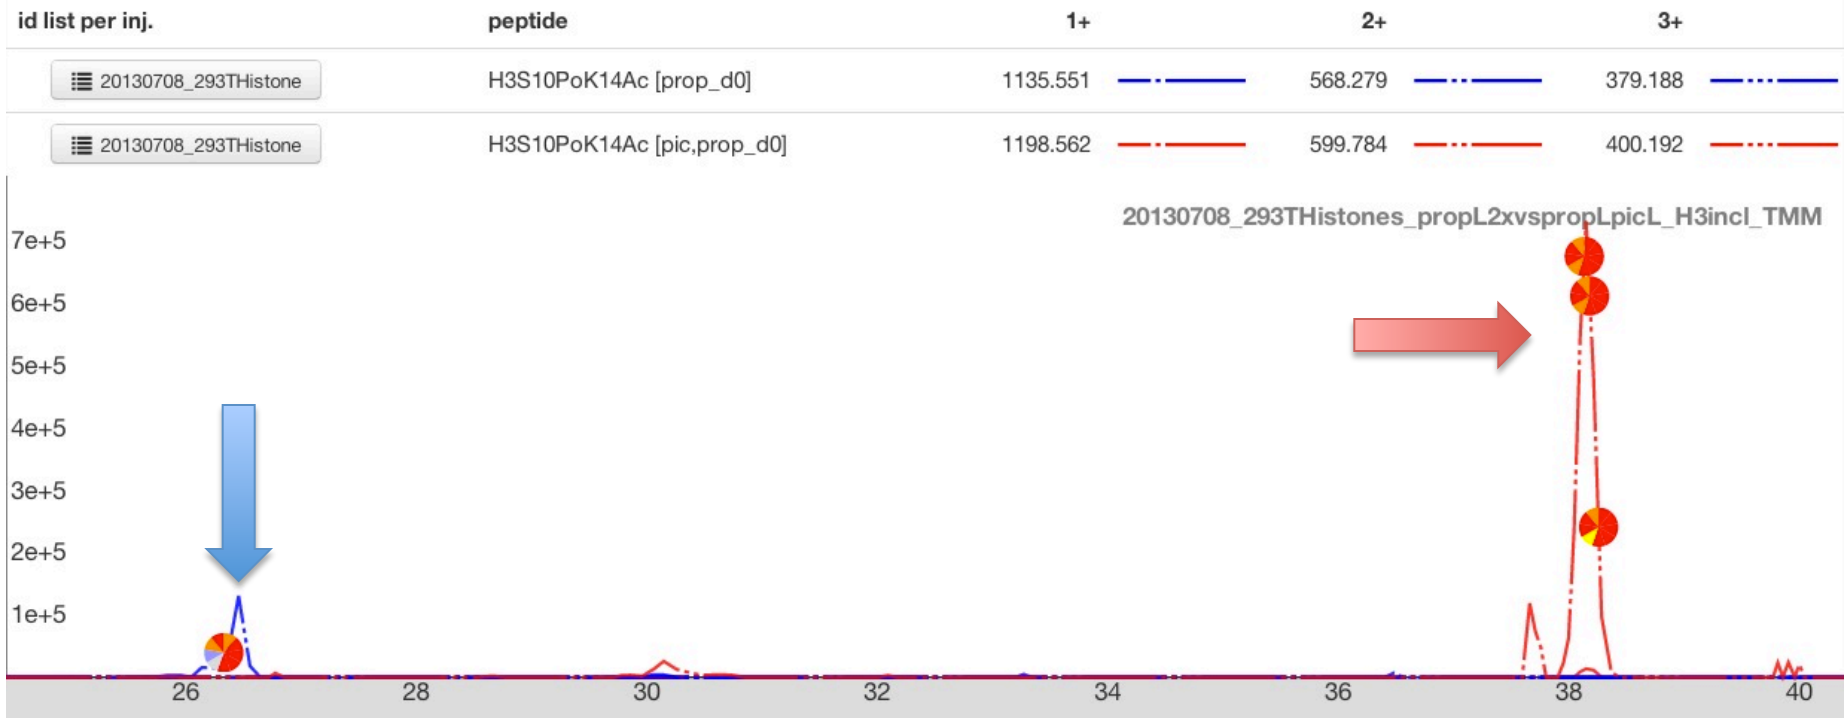

Quanti event: 25.4-27.5min

| injection                                           | peptide                    | charge | m/z       | auc    |
|-----------------------------------------------------|----------------------------|--------|-----------|--------|
| 20130708_293THistones_propL2xvspropLpicL_H3incl_TMM | H3S10PoK14Ac [prop_d0]     | 1      | 1135.5507 | 0.0e+0 |
| 20130708_293THistones_propL2xvspropLpicL_H3incl_TMM | H3S10PoK14Ac [pic,prop_d0] | 1      | 1198.5616 | 0.0e+0 |
| 20130708_293THistones_propL2xvspropLpicL_H3incl_TMM | H3S10PoK14Ac [prop_d0]     | 2      | 568.2790  | 1.2e+6 |
| 20130708_293THistones_propL2xvspropLpicL_H3incl_TMM | H3S10PoK14Ac [pic,prop_d0] | 2      | 599.7844  | 3.1e+4 |
| 20130708_293THistones_propL2xvspropLpicL_H3incl_TMM | H3S10PoK14Ac [prop_d0]     | 3      | 379.1884  | 4.5e+4 |
| 20130708_293THistones_propL2xvspropLpicL_H3incl_TMM | H3S10PoK14Ac [pic,prop_d0] | 3      | 400.1921  | 0.0e+0 |

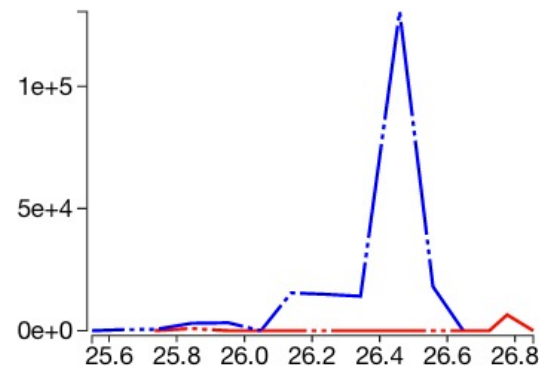

Quanti event: 37.3-38.8min

| injection                                           | peptide                    | charge | m/z       | auc    |
|-----------------------------------------------------|----------------------------|--------|-----------|--------|
| 20130708_293THistones_propL2xvspropLpicL_H3incl_TMM | H3S10PoK14Ac [prop_d0]     | 1      | 1135.5507 | 0.0e+0 |
| 20130708_293THistones_propL2xvspropLpicL_H3incl_TMM | H3S10PoK14Ac [pic,prop_d0] | 1      | 1198.5616 | 1.2e+5 |
| 20130708_293THistones_propL2xvspropLpicL_H3incl_TMM | H3S10PoK14Ac [prop_d0]     | 2      | 568.2790  | 0.0e+0 |
| 20130708_293THistones_propL2xvspropLpicL_H3incl_TMM | H3S10PoK14Ac [pic,prop_d0] | 2      | 599.7844  | 8.4e+6 |
| 20130708_293THistones_propL2xvspropLpicL_H3incl_TMM | H3S10PoK14Ac [prop_d0]     | 3      | 379.1884  | 0.0e+0 |
| 20130708_293THistones_propL2xvspropLpicL_H3incl_TMM | H3S10PoK14Ac [pic,prop_d0] | 3      | 400.1921  | 0.0e+0 |

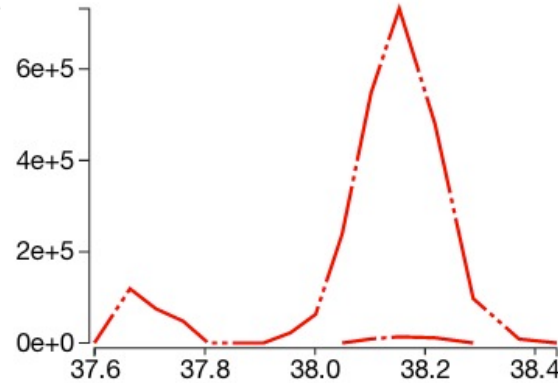

# H3\_K9-R17: Prop-KSPoTGGKAcAPR MS/MS

### Experimental spectrum

scan 3575  
 retention time 26.3min  
 precursor m/z 568.2783  
 precursor charge 2+

### Theoretical

M H<sup>2+</sup> 568.2790  
 MH  $\Delta_{mass}$  Da -0.0015  
 MH  $\Delta_{mass}$  ppm -1.3

### edit peptide

{Propionyl}K{Propionyl}S{Phospho}TGGK{Acetyl}APR align

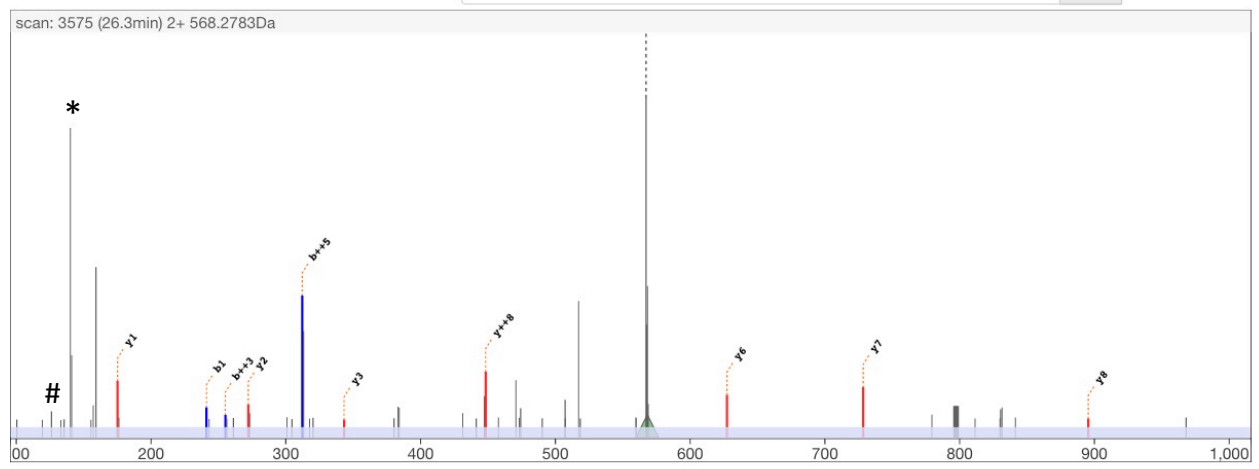

| Anchor        | Current         |
|---------------|-----------------|
| click on peak | mouse over peak |
| m/z 895.4161  | m/z 797.4393    |
| intensity 102 | intensity 248   |
| int. rank 42  | int. rank 15    |

**Explanation?**  
 delta mass could be...  
 $\Delta_{m/z}$  -97.97681

**Tune the seq**  
 Align anchor peak

|   | b++    | b       | y       | y++    |   |
|---|--------|---------|---------|--------|---|
|   |        |         | 1079.52 | 540.27 | 9 |
| 1 | 121.08 | 241.15  | 895.40  | 448.21 | 8 |
| 2 | 204.58 | 408.15  | 728.40  | 364.71 | 7 |
| 3 | 255.10 | 509.20  | 627.36  | 314.18 | 6 |
| 4 | 283.61 | 566.22  | 570.34  | 285.67 | 5 |
| 5 | 312.13 | 623.24  | 513.31  | 257.16 | 4 |
| 6 | 397.18 | 793.35  | 343.21  | 172.11 | 3 |
| 7 | 432.70 | 864.39  | 272.17  | 136.59 | 2 |
| 8 | 481.22 | 961.44  | 175.12  | 88.06  | 1 |
| 9 | 559.27 | 1117.54 |         |        |   |

\* = 140Da diagnostic ion  
 # = 126Da diagnostic ion

y8 - H3PO4



# H3\_K9-R17: PIC-KSPoTGGKAcAPR MS/MS

### Experimental spectrum

scan 6140  
 retention time 38.1min  
 precursor m/z 599.7842  
 precursor charge 2+

### Theoretical

M H<sup>2+</sup> 599.7844  
 MH  $\Delta_{mass}$  Da -0.0005  
 MH  $\Delta_{mass}$  ppm -0.4

### edit peptide

{PIC}K{Propionyl}S{Phospho}TGGK{Acetyl}APR

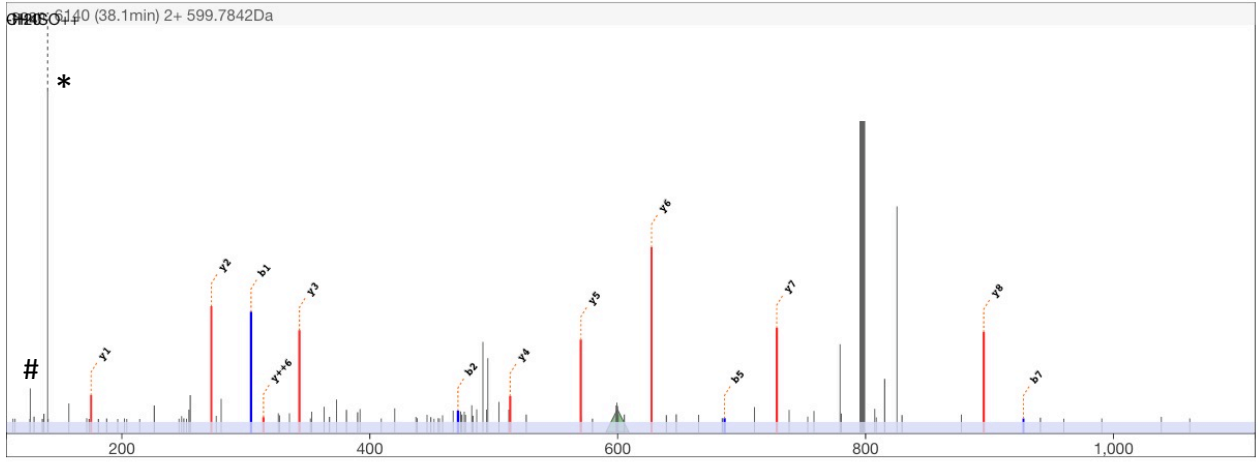

|   | b++    | b       |         | y       | y++    |   |
|---|--------|---------|---------|---------|--------|---|
|   | 60.53  | 120.04  | PIC     | 1079.52 | 540.27 | 9 |
| 1 | 152.59 | 304.17  | K       | 895.40  | 448.21 | 8 |
| 2 | 236.09 | 471.16  | S       | 728.40  | 364.71 | 7 |
| 3 | 286.61 | 572.21  | Phospho | 627.36  | 314.18 | 6 |
| 4 | 315.12 | 629.23  | T       | 570.34  | 285.67 | 5 |
| 5 | 343.63 | 686.25  | G       | 513.31  | 257.16 | 4 |
| 6 | 428.68 | 856.36  | K       | 343.21  | 172.11 | 3 |
| 7 | 464.20 | 927.40  | Acetyl  | 272.17  | 136.59 | 2 |
| 8 | 512.73 | 1024.45 | A       | 175.12  | 88.06  | 1 |
| 9 | 590.78 | 1180.55 | P       |         |        |   |
|   |        |         | R       |         |        |   |

| Anchor          | Current         |
|-----------------|-----------------|
| click on peak   | mouse over peak |
| m/z 895.4010    | m/z 797.4262    |
| intensity 11640 | intensity 38895 |
| int. rank 6     | int. rank 96    |

**Explanation?**  
 delta mass could be...  
 $\Delta_{m/z}$  -97.97479

**Tune the seq**  
 Align anchor peak

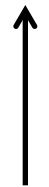

y8 - H3PO4

\* = 140Da diagnostic ion  
 # = 126Da diagnostic ion

# H3\_K9-R17:

## KS**Prop**TGGK**Ac**APR

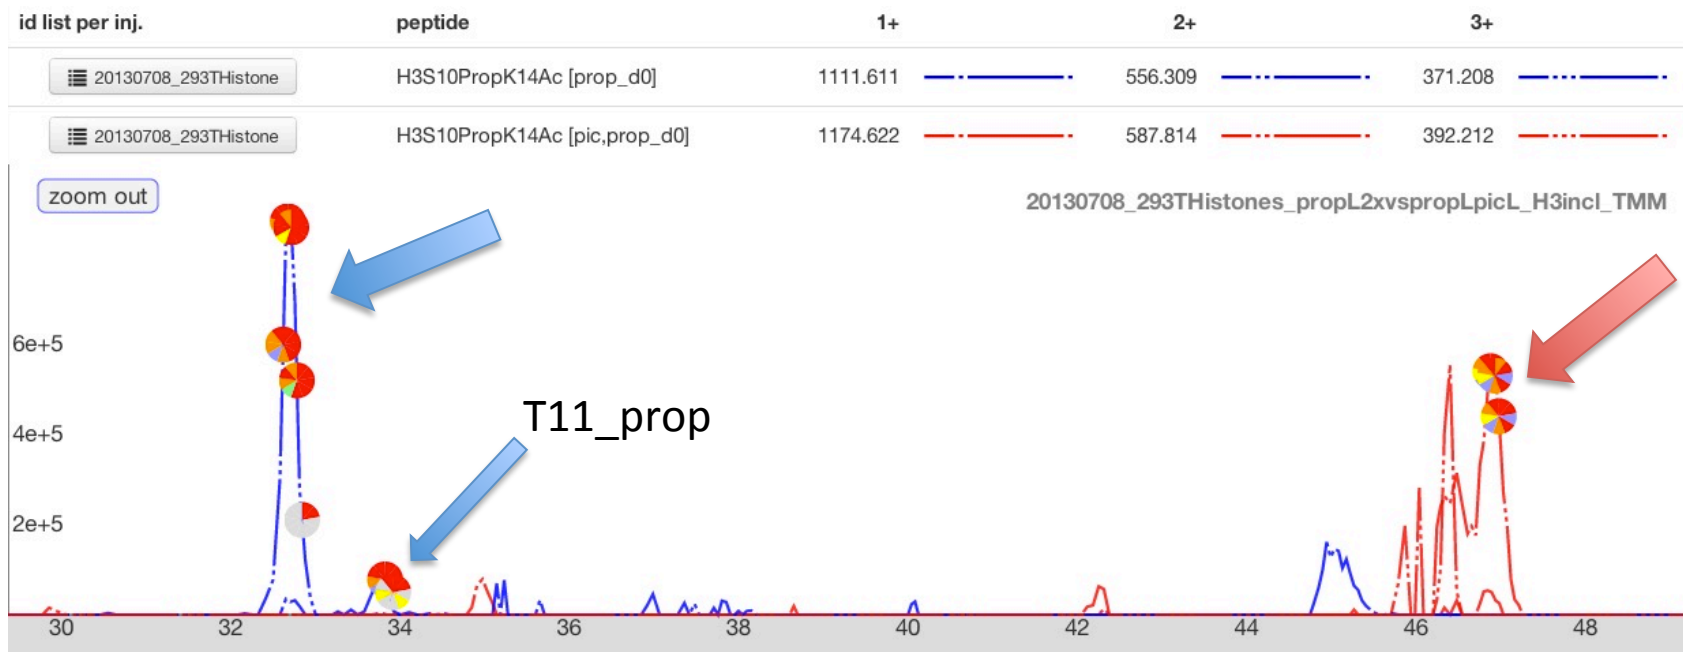

### Quanti event: 32.2-33.2min

| injection                                           | peptide                      | charge | m/z       | auc    |
|-----------------------------------------------------|------------------------------|--------|-----------|--------|
| 20130708_293THistones_propL2xvspropLpicL_H3incl_TMM | H3S10PropK14Ac [prop_d0]     | 1      | 1111.6106 | 3.9e+5 |
| 20130708_293THistones_propL2xvspropLpicL_H3incl_TMM | H3S10PropK14Ac [pic,prop_d0] | 1      | 1174.6215 | 0.0e+0 |
| 20130708_293THistones_propL2xvspropLpicL_H3incl_TMM | H3S10PropK14Ac [prop_d0]     | 2      | 556.3089  | 1.2e+7 |
| 20130708_293THistones_propL2xvspropLpicL_H3incl_TMM | H3S10PropK14Ac [pic,prop_d0] | 2      | 587.8144  | 0.0e+0 |
| 20130708_293THistones_propL2xvspropLpicL_H3incl_TMM | H3S10PropK14Ac [prop_d0]     | 3      | 371.2084  | 0.0e+0 |
| 20130708_293THistones_propL2xvspropLpicL_H3incl_TMM | H3S10PropK14Ac [pic,prop_d0] | 3      | 392.2120  | 0.0e+0 |

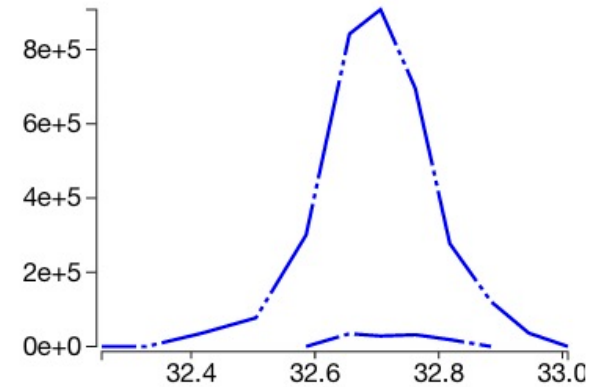

### Quanti event: 45.7-47.3min

| injection                                           | peptide                      | charge | m/z       | auc    |
|-----------------------------------------------------|------------------------------|--------|-----------|--------|
| 20130708_293THistones_propL2xvspropLpicL_H3incl_TMM | H3S10PropK14Ac [prop_d0]     | 1      | 1111.6106 | 0.0e+0 |
| 20130708_293THistones_propL2xvspropLpicL_H3incl_TMM | H3S10PropK14Ac [pic,prop_d0] | 1      | 1174.6215 | 8.4e+5 |
| 20130708_293THistones_propL2xvspropLpicL_H3incl_TMM | H3S10PropK14Ac [prop_d0]     | 2      | 556.3089  | 0.0e+0 |
| 20130708_293THistones_propL2xvspropLpicL_H3incl_TMM | H3S10PropK14Ac [pic,prop_d0] | 2      | 587.8144  | 1.8e+7 |
| 20130708_293THistones_propL2xvspropLpicL_H3incl_TMM | H3S10PropK14Ac [prop_d0]     | 3      | 371.2084  | 0.0e+0 |
| 20130708_293THistones_propL2xvspropLpicL_H3incl_TMM | H3S10PropK14Ac [pic,prop_d0] | 3      | 392.2120  | 4.4e+6 |

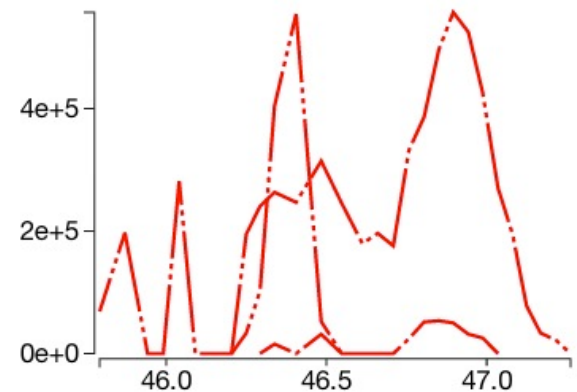

**Experimental spectrum**

scan 4838  
 retention time 32.7min  
 precursor m/z 556.3083  
 precursor charge 2+

**Theoretical**

M H<sup>2+</sup> 556.3089  
 MH Δ<sub>mass</sub> Da -0.0012  
 MH Δ<sub>mass</sub> ppm -1.1

**edit peptide**

{Propionyl}K{Propionyl}S{Propionyl}TGGK{Acetyl}APR

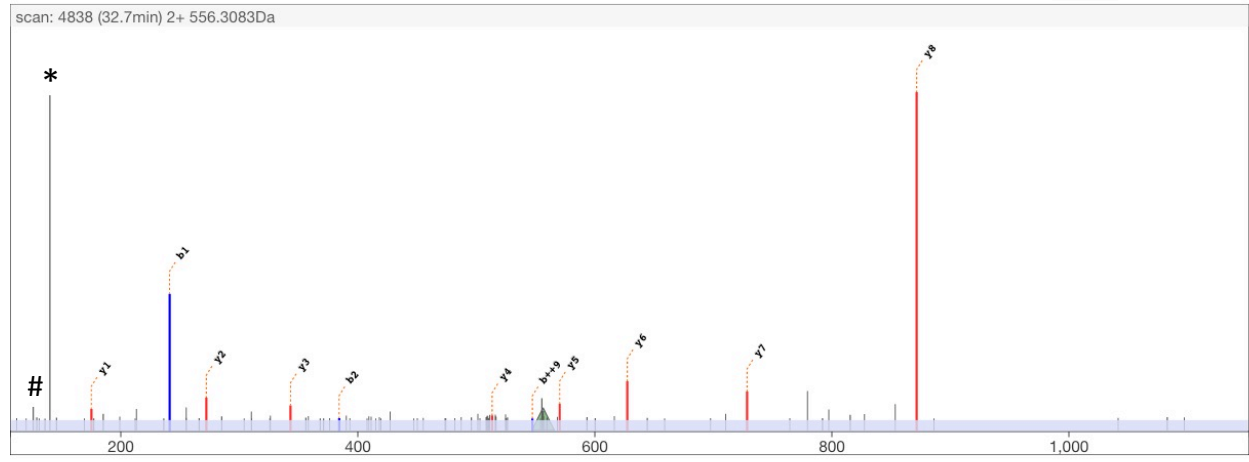

|   | b++    | b       | y       | y++    |   |
|---|--------|---------|---------|--------|---|
|   |        |         | 1055.58 | 528.30 | 9 |
| 1 | 121.08 | 241.15  | 871.46  | 436.24 | 8 |
| 2 | 192.61 | 384.21  | 728.40  | 364.71 | 7 |
| 3 | 243.13 | 485.26  | 627.36  | 314.18 | 6 |
| 4 | 271.64 | 542.28  | 570.34  | 285.67 | 5 |
| 5 | 300.16 | 599.30  | 513.31  | 257.16 | 4 |
| 6 | 385.21 | 769.41  | 343.21  | 172.11 | 3 |
| 7 | 420.73 | 840.45  | 272.17  | 136.59 | 2 |
| 8 | 469.25 | 937.50  | 175.12  | 88.06  | 1 |
| 9 | 547.30 | 1093.60 |         |        |   |

\* = 140Da diagnostic ion  
 # = 126Da diagnostic ion

### Experimental spectrum

scan 8751  
 retention time 47.0min  
 precursor m/z 587.8121  
 precursor charge 2+

### Theoretical

M H<sup>2+</sup> 587.8144  
 MH Δ<sub>mass</sub> Da -0.0045  
 MH Δ<sub>mass</sub> ppm -3.8

### edit peptide

{PIC}K{Propionyl}S{Propionyl}TGGK{Acetyl}APR align

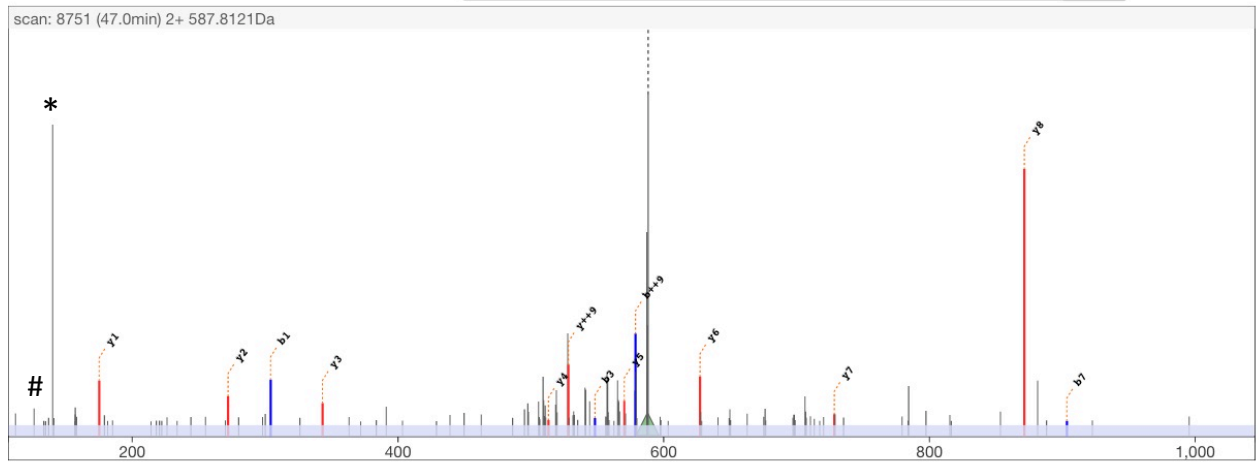

|   | b++    | b       |           | y       | y++    |   |
|---|--------|---------|-----------|---------|--------|---|
|   | 60.53  | 120.04  | PIC       | 1055.58 | 528.30 | 9 |
| 1 | 152.59 | 304.17  | K         | 871.46  | 436.24 | 8 |
| 2 | 224.12 | 447.22  | S         | 728.40  | 364.71 | 7 |
| 3 | 274.64 | 548.27  | Propionyl | 627.36  | 314.18 | 6 |
| 4 | 303.15 | 605.29  | T         | 570.34  | 285.67 | 5 |
| 5 | 331.66 | 662.31  | G         | 513.31  | 257.16 | 4 |
| 6 | 416.71 | 832.42  | G         | 343.21  | 172.11 | 3 |
| 7 | 452.23 | 903.46  | K         | 272.17  | 136.59 | 2 |
| 8 | 500.76 | 1000.51 | Acetyl    | 175.12  | 88.06  | 1 |
| 9 | 578.81 | 1156.61 | A         |         |        |   |
|   |        |         | P         |         |        |   |
|   |        |         | R         |         |        |   |

\* = 140Da diagnostic ion  
 # = 126Da diagnostic ion

# H3\_K9-R17:

## KSTPropGGKAcAPR

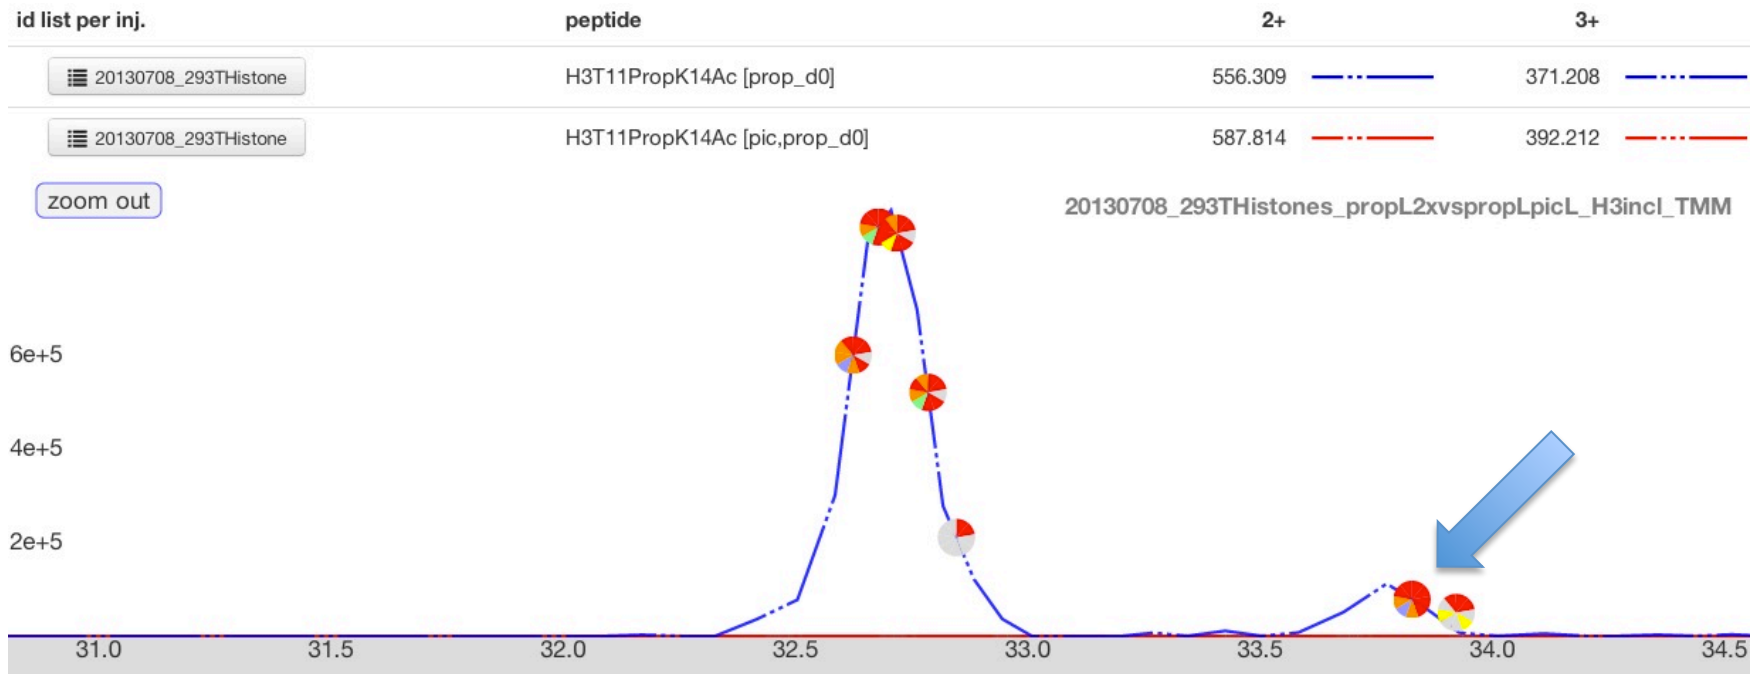

### Quanti event: 33.1-34.2min

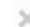

| injection                                           | peptide                      | charge | m/z       | auc    |
|-----------------------------------------------------|------------------------------|--------|-----------|--------|
| 20130708_293THistones_propL2xvspropLpicL_H3incl_TMM | H3T11PropK14Ac [prop_d0]     | 1      | 1111.6106 | 1.7e+4 |
| 20130708_293THistones_propL2xvspropLpicL_H3incl_TMM | H3T11PropK14Ac [pic,prop_d0] | 1      | 1174.6215 | 0.0e+0 |
| 20130708_293THistones_propL2xvspropLpicL_H3incl_TMM | H3T11PropK14Ac [prop_d0]     | 2      | 556.3089  | 1.3e+6 |
| 20130708_293THistones_propL2xvspropLpicL_H3incl_TMM | H3T11PropK14Ac [pic,prop_d0] | 2      | 587.8144  | 0.0e+0 |
| 20130708_293THistones_propL2xvspropLpicL_H3incl_TMM | H3T11PropK14Ac [prop_d0]     | 3      | 371.2084  | 0.0e+0 |
| 20130708_293THistones_propL2xvspropLpicL_H3incl_TMM | H3T11PropK14Ac [pic,prop_d0] | 3      | 392.2120  | 0.0e+0 |

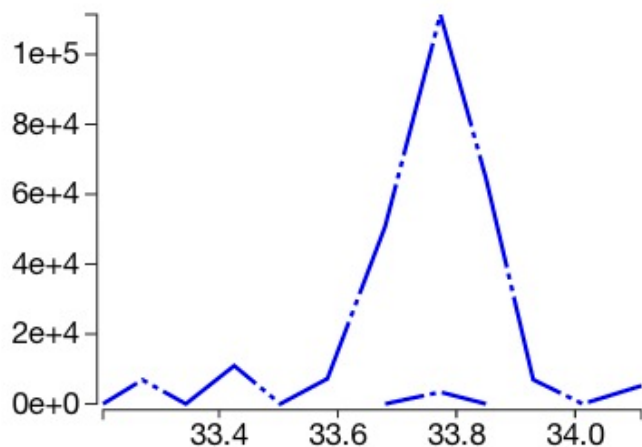

No peaks detected for PIC-labeling.

# H3\_K9-R17: Prop-KSTPropGGKAcAPR MS/MS

### Experimental spectrum

scan 5086  
 retention time 33.8min  
 precursor m/z 556.3085  
 precursor charge 2+

### Theoretical

M H<sup>2+</sup> 556.3089  
 MH  $\Delta_{mass}$  Da -0.0009  
 MH  $\Delta_{mass}$  ppm -0.8

### edit peptide

{Propionyl}K{Propionyl}ST{Propionyl}GGK{Acetyl}APR

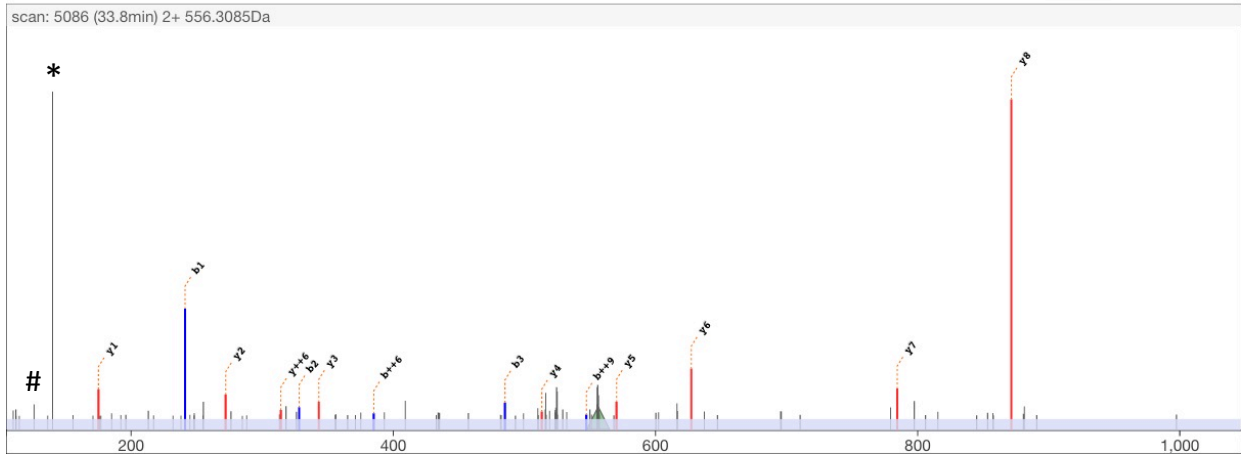

|   | b++    | b       |           | y       | y++    |   |
|---|--------|---------|-----------|---------|--------|---|
|   |        |         | Propionyl | 1055.58 | 528.30 | 9 |
| 1 | 121.08 | 241.15  | K         | 871.46  | 436.24 | 8 |
| 2 | 164.60 | 328.19  | Propionyl | 784.43  | 392.72 | 7 |
| 3 | 243.13 | 485.26  | S         | 627.36  | 314.18 | 6 |
| 4 | 271.64 | 542.28  | T         | 570.34  | 285.67 | 5 |
| 5 | 300.16 | 599.30  | Propionyl | 513.31  | 257.16 | 4 |
| 6 | 385.21 | 769.41  | G         | 343.21  | 172.11 | 3 |
| 7 | 420.73 | 840.45  | K         | 272.17  | 136.59 | 2 |
| 8 | 469.25 | 937.50  | Acetyl    | 175.12  | 88.06  | 1 |
| 9 | 547.30 | 1093.60 | A         |         |        |   |
|   |        |         | P         |         |        |   |
|   |        |         | R         |         |        |   |

\* = 140Da diagnostic ion  
 # = 126Da diagnostic ion



# H3\_K9-R17:

## KMe1STGGKAcAPR

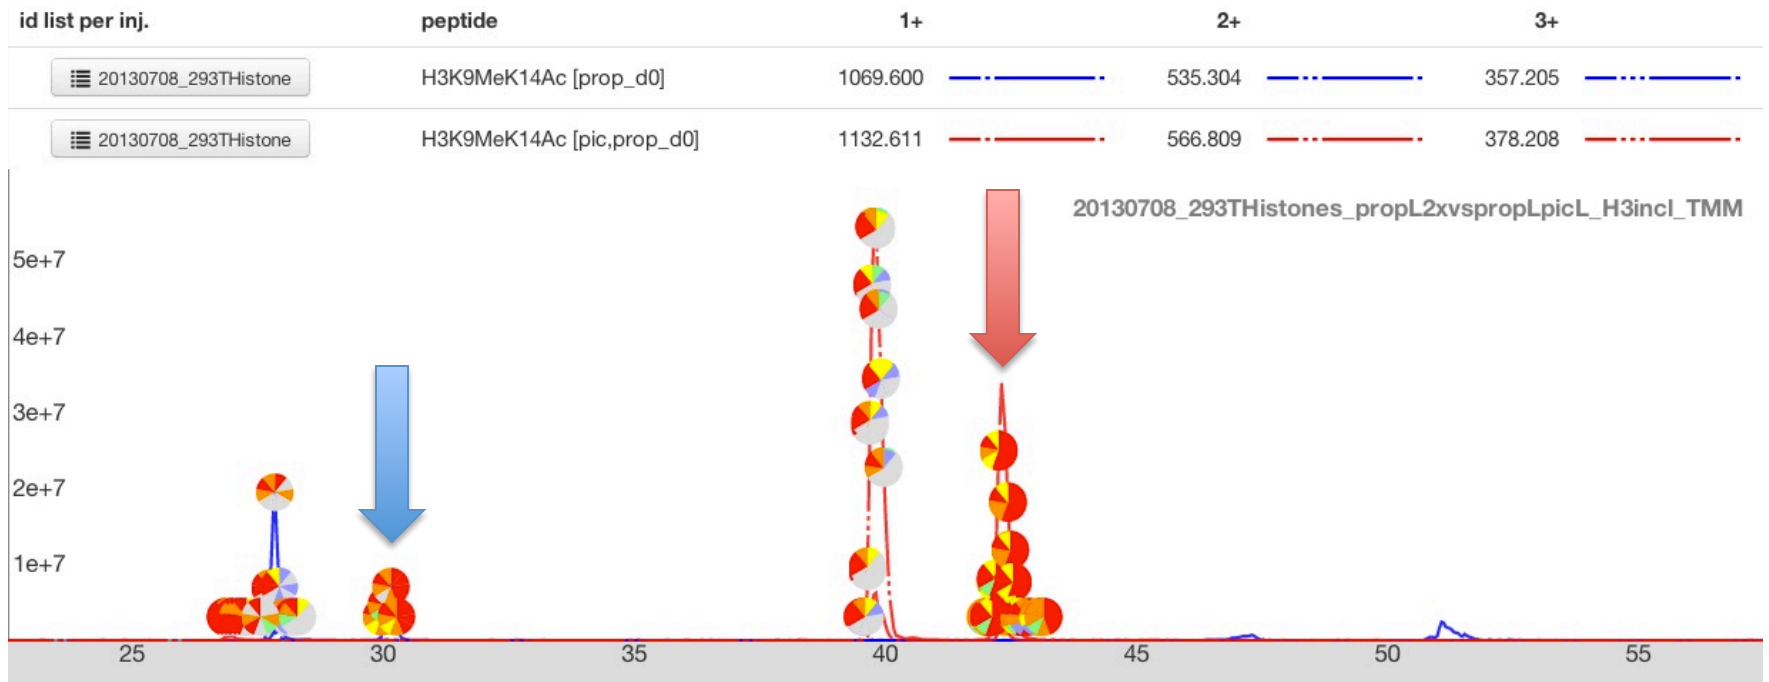

### Quanti event: 29.7-30.9min

| injection                                           | peptide                   | charge | m/z       | auc    |
|-----------------------------------------------------|---------------------------|--------|-----------|--------|
| 20130708_293THistones_propL2xvspropLpicL_H3incl_TMM | H3K9MeK14Ac [prop_d0]     | 1      | 1069.6000 | 1.5e+6 |
| 20130708_293THistones_propL2xvspropLpicL_H3incl_TMM | H3K9MeK14Ac [pic,prop_d0] | 1      | 1132.6109 | 0.0e+0 |
| 20130708_293THistones_propL2xvspropLpicL_H3incl_TMM | H3K9MeK14Ac [prop_d0]     | 2      | 535.3037  | 9.0e+7 |
| 20130708_293THistones_propL2xvspropLpicL_H3incl_TMM | H3K9MeK14Ac [pic,prop_d0] | 2      | 566.8091  | 4.1e+4 |
| 20130708_293THistones_propL2xvspropLpicL_H3incl_TMM | H3K9MeK14Ac [prop_d0]     | 3      | 357.2049  | 0.0e+0 |
| 20130708_293THistones_propL2xvspropLpicL_H3incl_TMM | H3K9MeK14Ac [pic,prop_d0] | 3      | 378.2085  | 0.0e+0 |

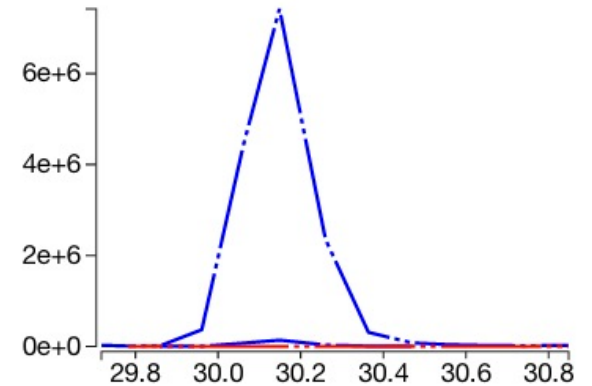

### Quanti event: 41.8-43.4min

| injection                                           | peptide                   | charge | m/z       | auc    |
|-----------------------------------------------------|---------------------------|--------|-----------|--------|
| 20130708_293THistones_propL2xvspropLpicL_H3incl_TMM | H3K9MeK14Ac [prop_d0]     | 1      | 1069.6000 | 0.0e+0 |
| 20130708_293THistones_propL2xvspropLpicL_H3incl_TMM | H3K9MeK14Ac [pic,prop_d0] | 1      | 1132.6109 | 2.6e+7 |
| 20130708_293THistones_propL2xvspropLpicL_H3incl_TMM | H3K9MeK14Ac [prop_d0]     | 2      | 535.3037  | 0.0e+0 |
| 20130708_293THistones_propL2xvspropLpicL_H3incl_TMM | H3K9MeK14Ac [pic,prop_d0] | 2      | 566.8091  | 5.0e+8 |
| 20130708_293THistones_propL2xvspropLpicL_H3incl_TMM | H3K9MeK14Ac [prop_d0]     | 3      | 357.2049  | 0.0e+0 |
| 20130708_293THistones_propL2xvspropLpicL_H3incl_TMM | H3K9MeK14Ac [pic,prop_d0] | 3      | 378.2085  | 3.5e+5 |

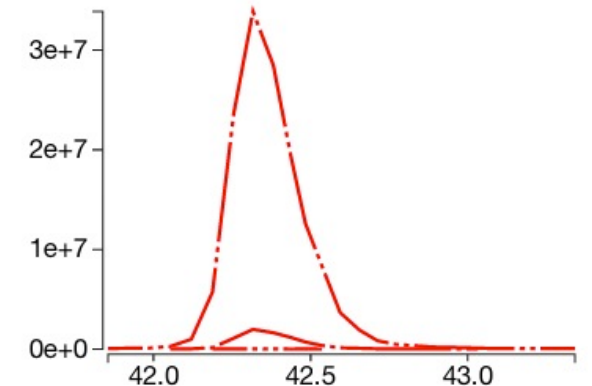

# H3\_K9-R17: Prop-KMe1STGGKAcAPR MS/MS

### Experimental spectrum

scan 4179  
 retention time 30.0min  
 precursor m/z 535.3033  
 precursor charge 2+

### Theoretical

M H<sup>2+</sup> 535.3037  
 MH  $\Delta_{mass}$  Da -0.0006  
 MH  $\Delta_{mass}$  ppm -0.6

### edit peptide

{Propionyl}K{Methyl,Propionyl}STGGK{Acetyl}APR align

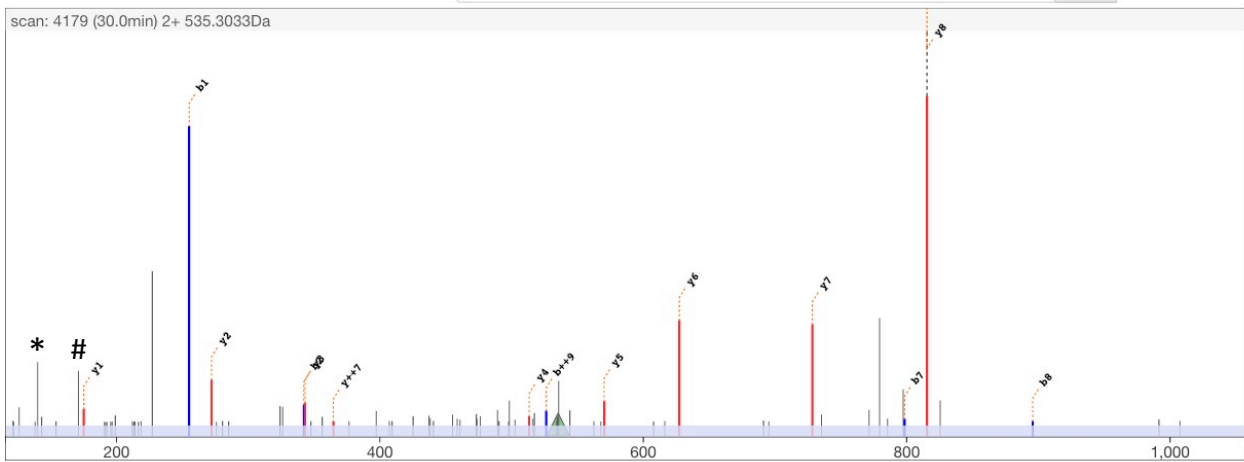

|   | b++    | b       |                  | y       | y++    |   |
|---|--------|---------|------------------|---------|--------|---|
|   |        |         | Propionyl        | 1013.57 | 507.29 | 9 |
| 1 | 128.09 | 255.17  | K                | 815.44  | 408.22 | 8 |
| 2 | 171.60 | 342.20  | Methyl,Propionyl | 728.40  | 364.71 | 7 |
| 3 | 222.13 | 443.25  | S                | 627.36  | 314.18 | 6 |
| 4 | 250.64 | 500.27  | T                | 570.34  | 285.67 | 5 |
| 5 | 279.15 | 557.29  | G                | 513.31  | 257.16 | 4 |
| 6 | 364.20 | 727.40  | K                | 343.21  | 172.11 | 3 |
| 7 | 399.72 | 798.44  | Acetyl           | 272.17  | 136.59 | 2 |
| 8 | 448.25 | 895.49  | A                | 175.12  | 88.06  | 1 |
| 9 | 526.30 | 1051.59 | P                |         |        |   |
|   |        |         | R                |         |        |   |

\* = 126Da diagnostic ion

# = 171Da diagnostic ion

**Experimental spectrum**

scan 7314  
 retention time 42.3min  
 precursor m/z 566.8087  
 precursor charge 2+

**Theoretical**

M H<sup>2+</sup> 566.8091  
 MH Δ<sub>mass</sub> Da -0.0008  
 MH Δ<sub>mass</sub> ppm -0.7

**edit peptide**

{PIC}K{Methyl,Propionyl}STGGK{Acetyl}APR align

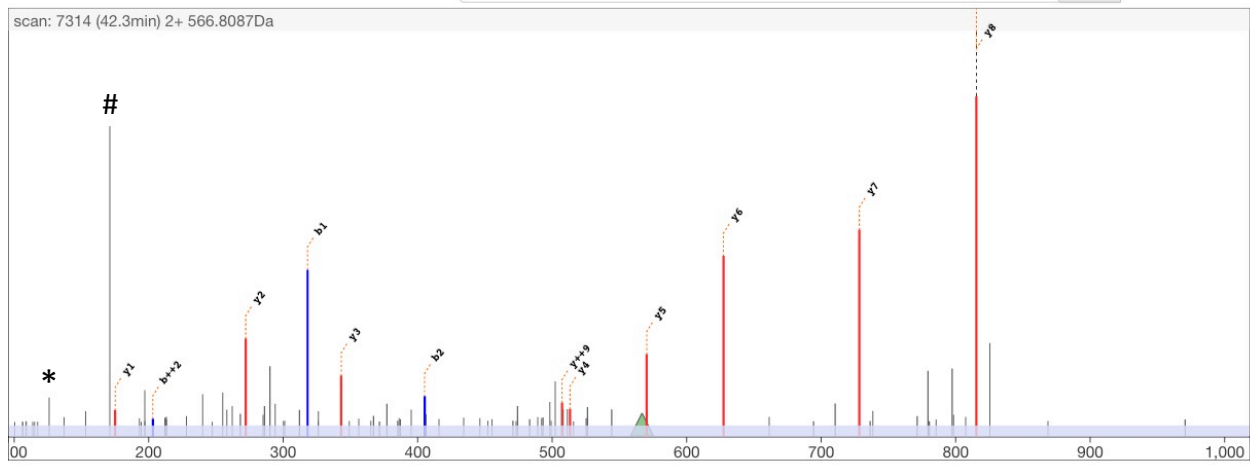

|   | b++    | b       |                  | y       | y++    |   |
|---|--------|---------|------------------|---------|--------|---|
|   | 60.53  | 120.04  | PIC              | 1013.57 | 507.29 | 9 |
| 1 | 159.59 | 318.18  | K                | 815.44  | 408.22 | 8 |
| 2 | 203.11 | 405.21  | Methyl,Propionyl | 728.40  | 364.71 | 7 |
| 3 | 253.63 | 506.26  | S                | 627.36  | 314.18 | 6 |
| 4 | 282.14 | 563.28  | T                | 570.34  | 285.67 | 5 |
| 5 | 310.66 | 620.30  | G                | 513.31  | 257.16 | 4 |
| 6 | 395.71 | 790.41  | K                | 343.21  | 172.11 | 3 |
| 7 | 431.23 | 861.45  | Acetyl           | 272.17  | 136.59 | 2 |
| 8 | 479.75 | 958.50  | A                | 175.12  | 88.06  | 1 |
| 9 | 557.80 | 1114.60 | P                |         |        |   |
|   |        |         | R                |         |        |   |

\* = 126Da diagnostic ion  
 # = 171Da diagnostic ion

# H3\_K9-R17:

## KMe1SPoTGGKAcAPR

No MS2 for Prop-labeling detected in peak with correct retention-time shift.

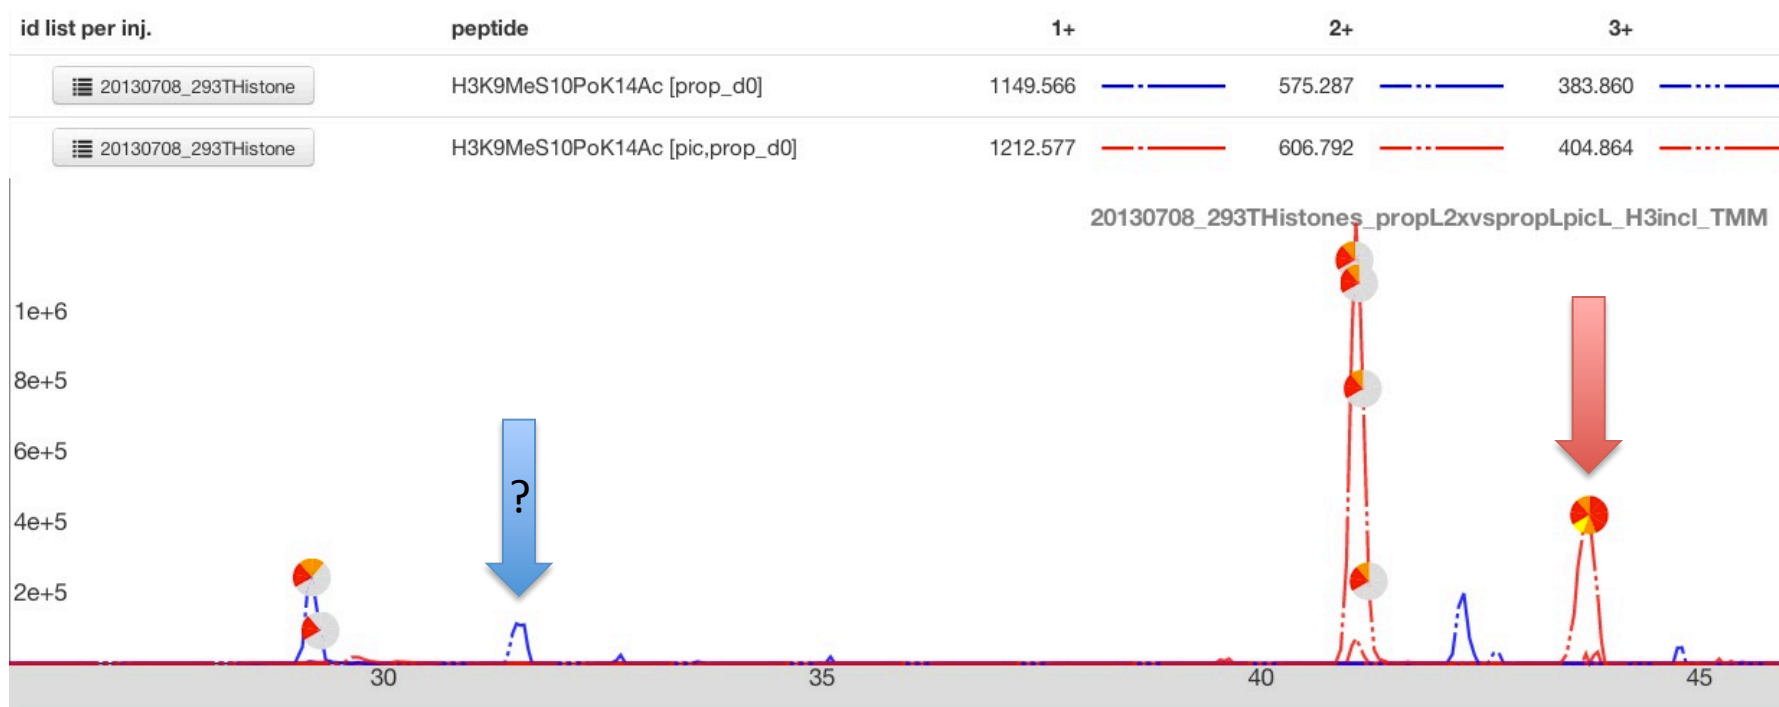

### Quanti event: 43.2-44.1min

| injection                                           | peptide                           | charge | m/z       | auc    |
|-----------------------------------------------------|-----------------------------------|--------|-----------|--------|
| 20130708_293THistones_propL2xvspropLpicL_H3incl_TMM | H3K9MeS10PoK14Ac<br>[prop_d0]     | 1      | 1149.5664 | 0.0e+0 |
| 20130708_293THistones_propL2xvspropLpicL_H3incl_TMM | H3K9MeS10PoK14Ac<br>[pic,prop_d0] | 1      | 1212.5773 | 2.2e+5 |
| 20130708_293THistones_propL2xvspropLpicL_H3incl_TMM | H3K9MeS10PoK14Ac<br>[prop_d0]     | 2      | 575.2868  | 0.0e+0 |
| 20130708_293THistones_propL2xvspropLpicL_H3incl_TMM | H3K9MeS10PoK14Ac<br>[pic,prop_d0] | 2      | 606.7923  | 6.2e+6 |
| 20130708_293THistones_propL2xvspropLpicL_H3incl_TMM | H3K9MeS10PoK14Ac<br>[prop_d0]     | 3      | 383.8603  | 0.0e+0 |
| 20130708_293THistones_propL2xvspropLpicL_H3incl_TMM | H3K9MeS10PoK14Ac<br>[pic,prop_d0] | 3      | 404.8639  | 0.0e+0 |

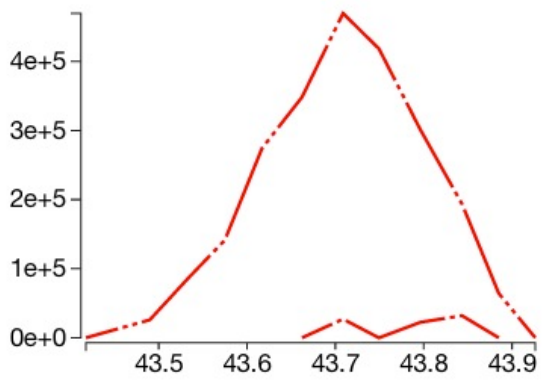

No peaks identified for Prop-labeling.

### Experimental spectrum

scan 7760  
 retention time 43.7min  
 precursor m/z 606.7911  
 precursor charge 2+

### Theoretical

M H<sup>2+</sup> 606.7923  
 MH Δ<sub>mass</sub> Da -0.0023  
 MH Δ<sub>mass</sub> ppm -1.9

### edit peptide

{PIC}K{Methyl,Propionyl}S{Phospho}TGGK{Acetyl}APR

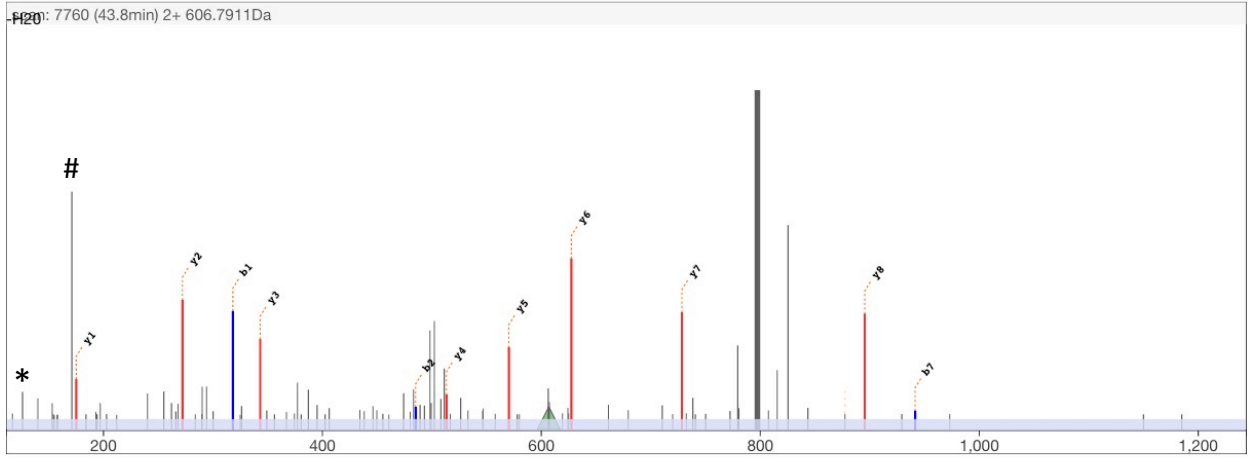

|   | b++    | b       |                  | y       | y++    |
|---|--------|---------|------------------|---------|--------|
|   | 60.53  | 120.04  | PIC              | 1093.54 | 547.27 |
| 1 | 159.59 | 318.18  | K                | 895.40  | 448.21 |
| 2 | 243.09 | 485.18  | Methyl,Propionyl | 728.40  | 364.71 |
| 3 | 293.62 | 586.23  | S                | 627.36  | 314.18 |
| 4 | 322.13 | 643.25  | Phospho          | 570.34  | 285.67 |
| 5 | 350.64 | 700.27  | T                | 513.31  | 257.16 |
| 6 | 435.69 | 870.38  | G                | 343.21  | 172.11 |
| 7 | 471.21 | 941.41  | K                | 272.17  | 136.59 |
| 8 | 519.74 | 1038.47 | Acetyl           | 175.12  | 88.06  |
| 9 | 597.79 | 1194.57 | A                |         |        |
|   |        |         | P                |         |        |
|   |        |         | R                |         |        |

| Anchor         | Current         |
|----------------|-----------------|
| click on peak  | mouse over peak |
| m/z 895.4007   | m/z 797.4244    |
| intensity 7984 | intensity 24889 |
| int. rank 7    | int. rank 0     |

Explanation?  
 delta mass could be...  
 Δ<sub>m/z</sub> -97.97626

Tune the seq  
 Align anchor peak

↑  
 y8 - H3PO4

\* = 126Da diagnostic ion  
 # = 171Da diagnostic ion

# H3\_K9-R17:

**K**Me**1**Sor**T****Prop**GG**K**Ac**APR**

Peak contains overlapping spectra for either PTM. T11prop shown, no MS2 found for Prop-labeling.

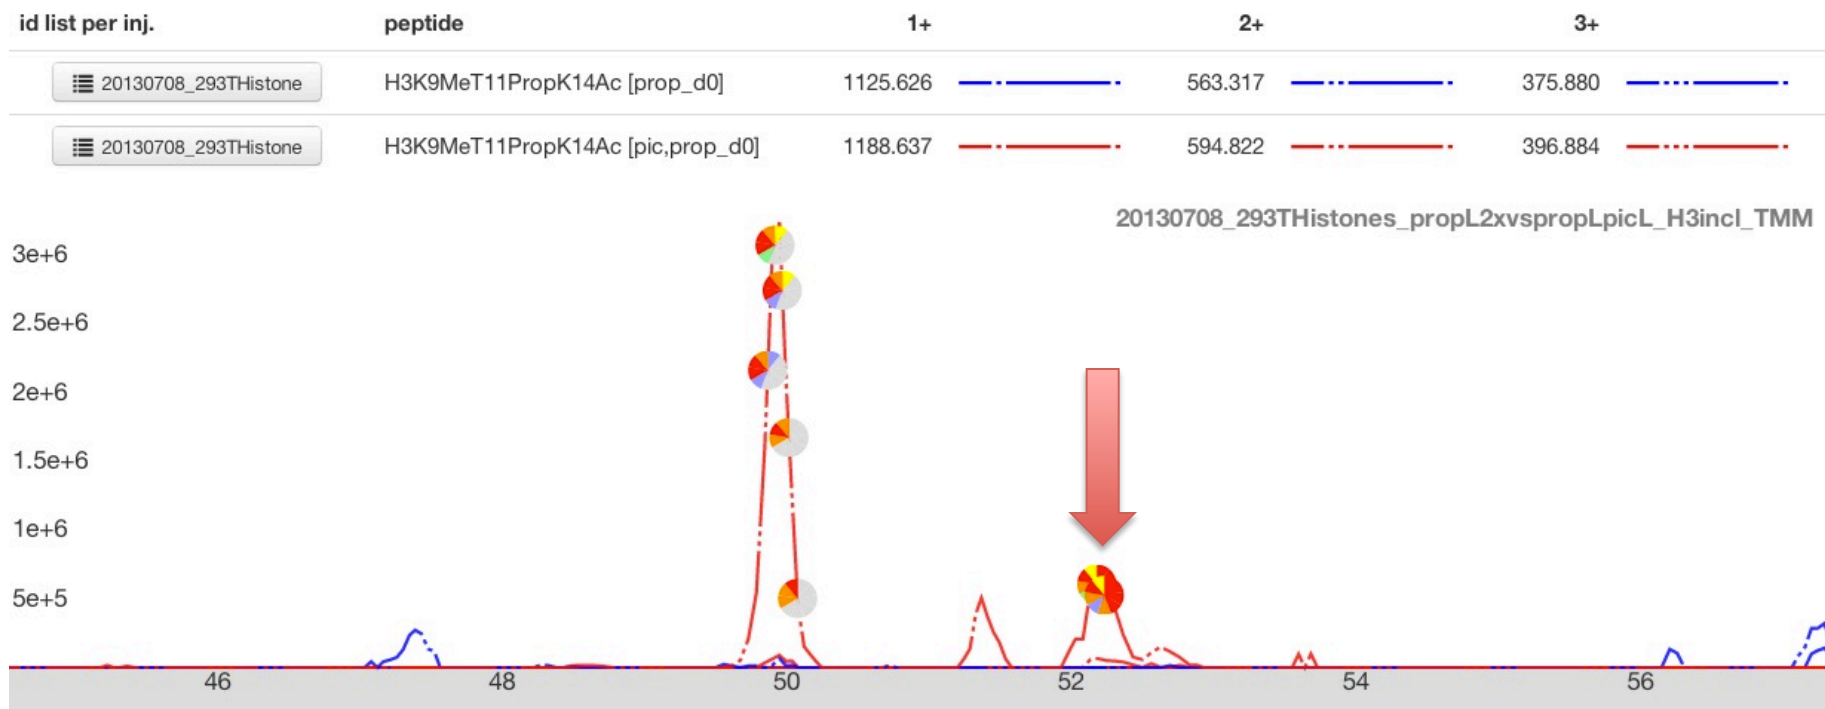



## Quanti event: 51.9-53.1min

| injection                                           | peptide                          | charge | m/z       | auc    |
|-----------------------------------------------------|----------------------------------|--------|-----------|--------|
| 20130708_293THistones_propL2xvspropLpicL_H3incl_TMM | H3K9MeT11PropK14Ac [prop_d0]     | 1      | 1125.6263 | 0.0e+0 |
| 20130708_293THistones_propL2xvspropLpicL_H3incl_TMM | H3K9MeT11PropK14Ac [pic,prop_d0] | 1      | 1188.6372 | 5.9e+5 |
| 20130708_293THistones_propL2xvspropLpicL_H3incl_TMM | H3K9MeT11PropK14Ac [prop_d0]     | 2      | 563.3168  | 3.0e+4 |
| 20130708_293THistones_propL2xvspropLpicL_H3incl_TMM | H3K9MeT11PropK14Ac [pic,prop_d0] | 2      | 594.8222  | 6.2e+6 |
| 20130708_293THistones_propL2xvspropLpicL_H3incl_TMM | H3K9MeT11PropK14Ac [prop_d0]     | 3      | 375.8803  | 0.0e+0 |
| 20130708_293THistones_propL2xvspropLpicL_H3incl_TMM | H3K9MeT11PropK14Ac [pic,prop_d0] | 3      | 396.8839  | 0.0e+0 |

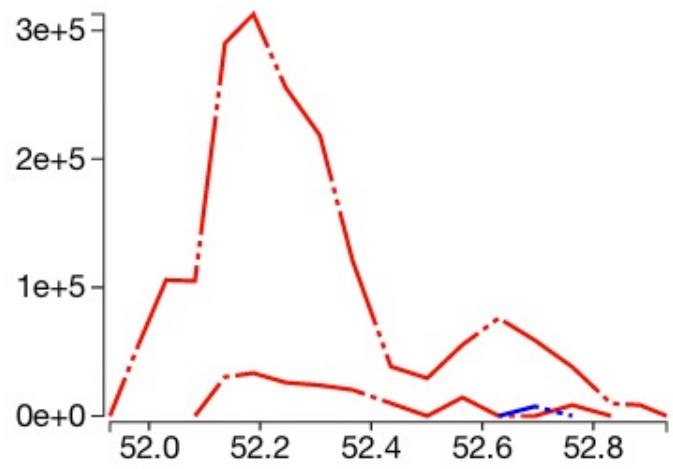

No peak identified for Prop-labeling.

### Experimental spectrum

scan 10462  
 retention time 52.2min  
 precursor m/z 594.8212  
 precursor charge 2+

### Theoretical

M H<sup>2+</sup> 594.8222  
 MH  $\Delta_{mass}$  Da -0.0021  
 MH  $\Delta_{mass}$  ppm -1.8

### edit peptide

{PIC}K{Methyl,Propionyl}ST{Propionyl}GGK{Acetyl}APR align

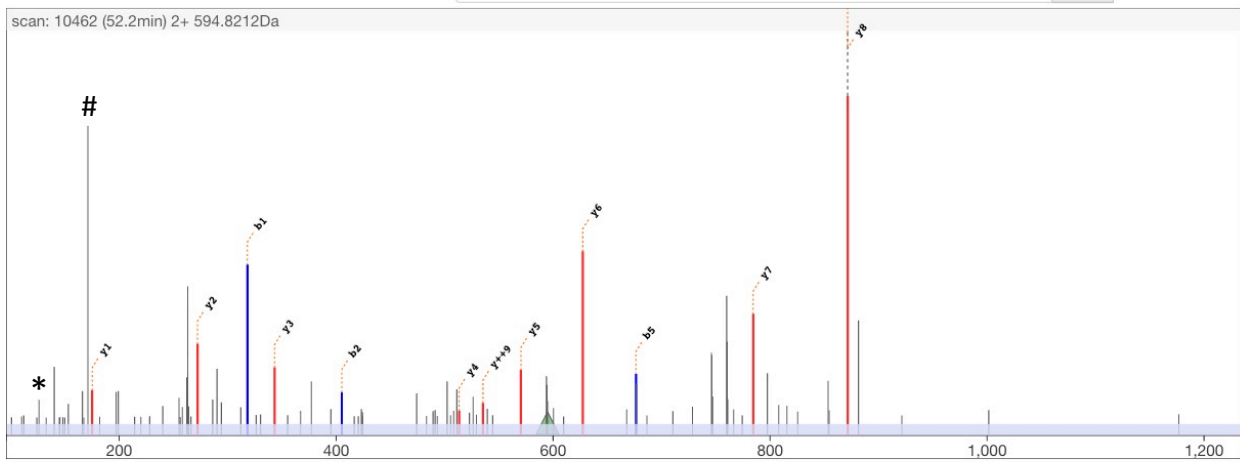

|   | b++    | b       |                  | y       | y++    |   |
|---|--------|---------|------------------|---------|--------|---|
|   | 60.53  | 120.04  | PIC              | 1069.60 | 535.30 | 9 |
| 1 | 159.59 | 318.18  | K                | 871.46  | 436.24 | 8 |
| 2 | 203.11 | 405.21  | Methyl,Propionyl | 784.43  | 392.72 | 7 |
| 3 | 281.65 | 562.29  | S                | 627.36  | 314.18 | 6 |
| 4 | 310.16 | 619.31  | T                | 570.34  | 285.67 | 5 |
| 5 | 338.67 | 676.33  | Propionyl        | 513.31  | 257.16 | 4 |
| 6 | 423.72 | 846.44  | G                | 343.21  | 172.11 | 3 |
| 7 | 459.24 | 917.47  | K                | 272.17  | 136.59 | 2 |
| 8 | 507.77 | 1014.53 | Acetyl           | 175.12  | 88.06  | 1 |
| 9 | 585.82 | 1170.63 | A                |         |        |   |
|   |        |         | P                |         |        |   |
|   |        |         | R                |         |        |   |

\* = 126Da diagnostic ion  
 # = 171Da diagnostic ion

# H3\_K9-R17:

## KMe2STGGKAcAPR

| id list per inj.       | peptide                | 1+       | 2+      | 3+      |
|------------------------|------------------------|----------|---------|---------|
| ☰ 20130708_293THistone | H3K9Me2K14Ac [prop_d0] | 1027.589 | 514.298 | 343.201 |
| ☰ 20130708_293THistone | H3K9Me2K14Ac [pic]     | 1090.600 | 545.804 | 364.205 |

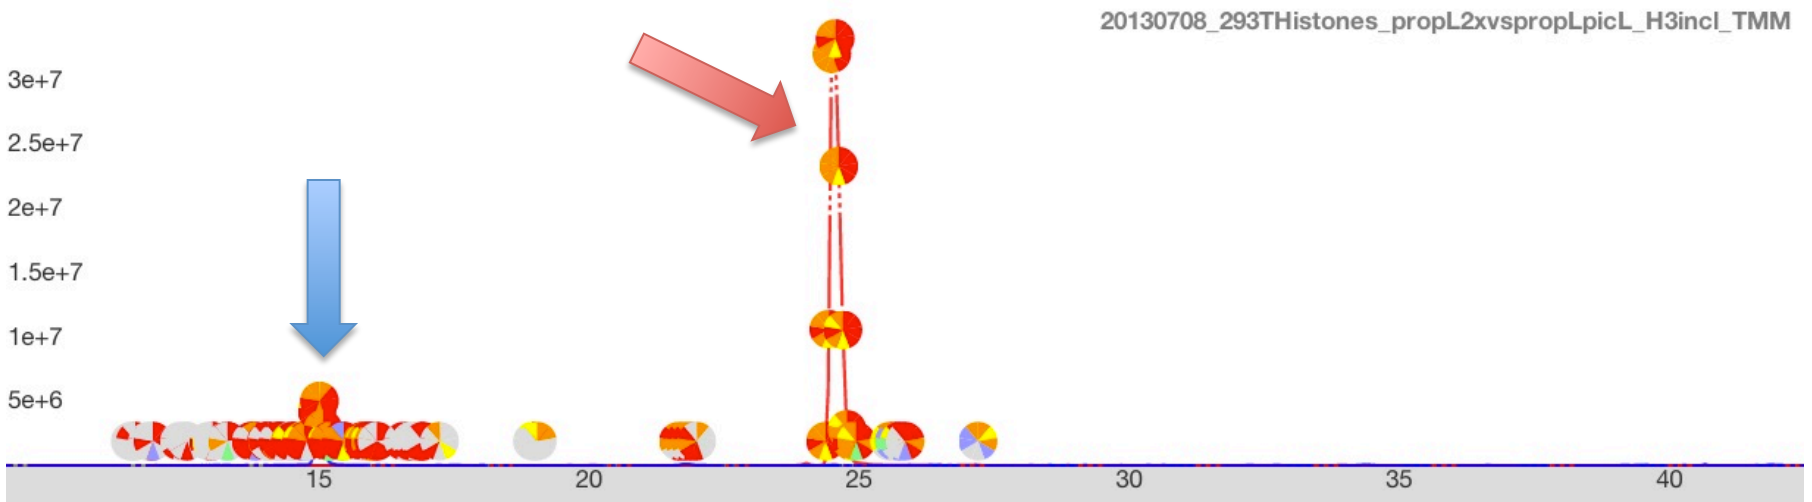

### Quanti event: 14.6-15.6min

| injection                                           | peptide                | charge | m/z       | auc    |
|-----------------------------------------------------|------------------------|--------|-----------|--------|
| 20130708_293THistones_propL2xvspropLpicL_H3incl_TMM | H3K9Me2K14Ac [prop_d0] | 1      | 1027.5895 | 6.4e+3 |
| 20130708_293THistones_propL2xvspropLpicL_H3incl_TMM | H3K9Me2K14Ac [pic]     | 1      | 1090.6004 | 0.0e+0 |
| 20130708_293THistones_propL2xvspropLpicL_H3incl_TMM | H3K9Me2K14Ac [prop_d0] | 2      | 514.2984  | 5.2e+7 |
| 20130708_293THistones_propL2xvspropLpicL_H3incl_TMM | H3K9Me2K14Ac [pic]     | 2      | 545.8038  | 0.0e+0 |
| 20130708_293THistones_propL2xvspropLpicL_H3incl_TMM | H3K9Me2K14Ac [prop_d0] | 3      | 343.2013  | 0.0e+0 |
| 20130708_293THistones_propL2xvspropLpicL_H3incl_TMM | H3K9Me2K14Ac [pic]     | 3      | 364.2050  | 0.0e+0 |

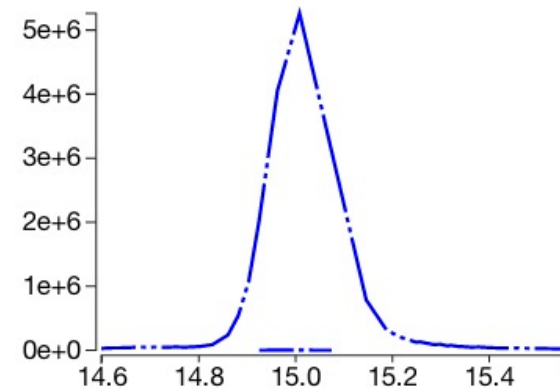

### Quanti event: 24.3-25.0min

| injection                                           | peptide                | charge | m/z       | auc    |
|-----------------------------------------------------|------------------------|--------|-----------|--------|
| 20130708_293THistones_propL2xvspropLpicL_H3incl_TMM | H3K9Me2K14Ac [prop_d0] | 1      | 1027.5895 | 0.0e+0 |
| 20130708_293THistones_propL2xvspropLpicL_H3incl_TMM | H3K9Me2K14Ac [pic]     | 1      | 1090.6004 | 4.1e+5 |
| 20130708_293THistones_propL2xvspropLpicL_H3incl_TMM | H3K9Me2K14Ac [prop_d0] | 2      | 514.2984  | 1.2e+4 |
| 20130708_293THistones_propL2xvspropLpicL_H3incl_TMM | H3K9Me2K14Ac [pic]     | 2      | 545.8038  | 4.5e+8 |
| 20130708_293THistones_propL2xvspropLpicL_H3incl_TMM | H3K9Me2K14Ac [prop_d0] | 3      | 343.2013  | 0.0e+0 |
| 20130708_293THistones_propL2xvspropLpicL_H3incl_TMM | H3K9Me2K14Ac [pic]     | 3      | 364.2050  | 0.0e+0 |

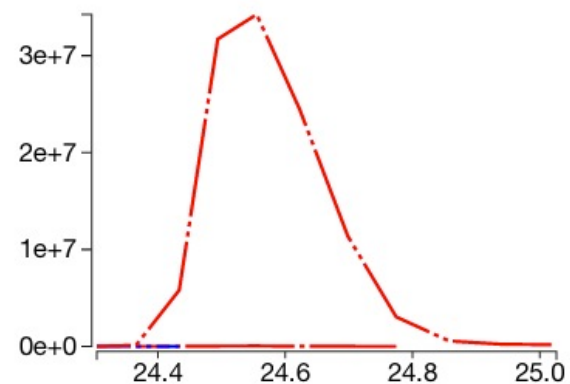

### Experimental spectrum

scan 1819  
 retention time 15.0min  
 precursor m/z 514.2979  
 precursor charge 2+

### Theoretical

M H<sup>2+</sup> 514.2984  
 MH Δ<sub>mass</sub> Da -0.0009  
 MH Δ<sub>mass</sub> ppm -0.9

### edit peptide

{Propionyl}K{Dimethyl}STGGK{Acetyl}APR align

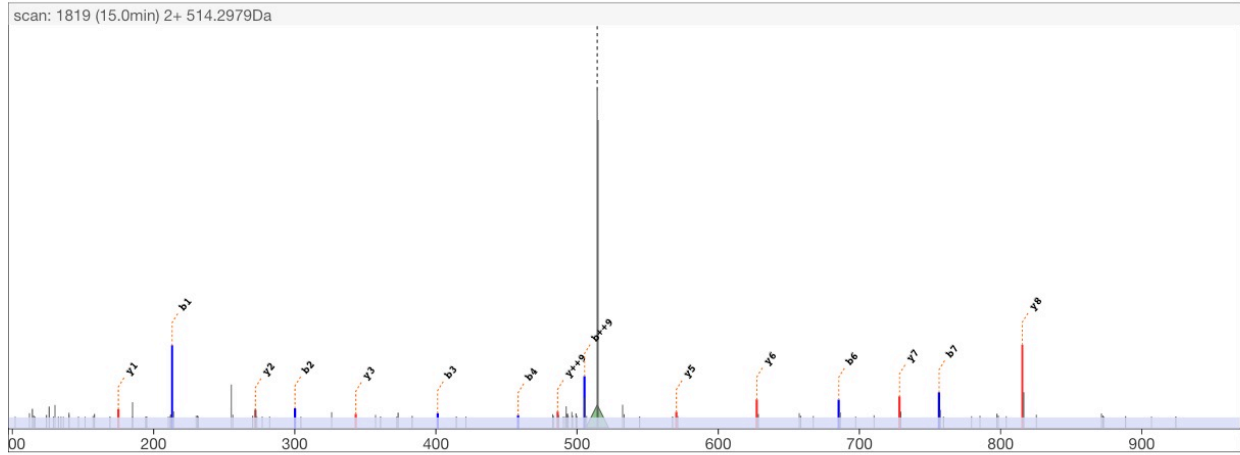

|   | b++    | b       | y      | y++    |   |
|---|--------|---------|--------|--------|---|
| 1 | 107.08 | 213.16  | 971.56 | 486.29 | 9 |
| 2 | 150.60 | 300.19  | 815.44 | 408.22 | 8 |
| 3 | 201.12 | 401.24  | 728.40 | 364.71 | 7 |
| 4 | 229.63 | 458.26  | 627.36 | 314.18 | 6 |
| 5 | 258.14 | 515.28  | 570.34 | 285.67 | 5 |
| 6 | 343.20 | 685.39  | 513.31 | 257.16 | 4 |
| 7 | 378.72 | 756.43  | 343.21 | 172.11 | 3 |
| 8 | 427.24 | 853.48  | 272.17 | 136.59 | 2 |
| 9 | 505.29 | 1009.58 | 175.12 | 88.06  | 1 |

Propionyl  
 K  
 Dimethyl  
 S  
 T  
 G  
 K  
 Acetyl  
 A  
 P  
 R

### Experimental spectrum

scan 3242  
 retention time 24.5min  
 precursor m/z 545.8034  
 precursor charge 2+

### Theoretical

M H<sup>2+</sup> 545.8038  
 MH  $\Delta_{mass}$  Da -0.0008  
 MH  $\Delta_{mass}$  ppm -0.8

### edit peptide

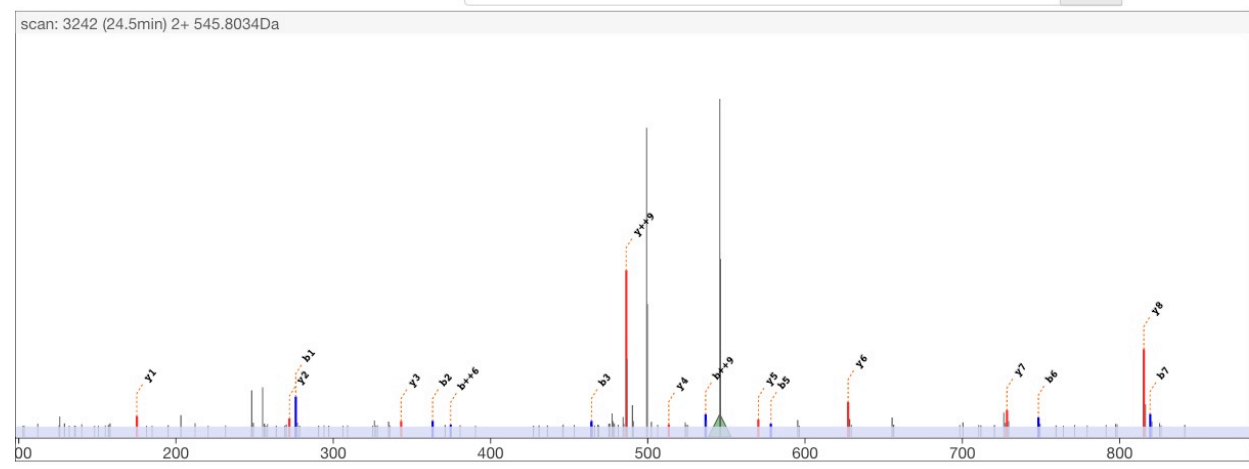

|   | b++    | b       |        | y      | y++    |   |
|---|--------|---------|--------|--------|--------|---|
|   | 60.53  | 120.04  | PIC    | 971.56 | 486.29 | 9 |
| 1 | 138.59 | 276.17  | K      | 815.44 | 408.22 | 8 |
| 2 | 182.10 | 363.20  | S      | 728.40 | 364.71 | 7 |
| 3 | 232.63 | 464.25  | T      | 627.36 | 314.18 | 6 |
| 4 | 261.14 | 521.27  | G      | 570.34 | 285.67 | 5 |
| 5 | 289.65 | 578.29  | G      | 513.31 | 257.16 | 4 |
| 6 | 374.70 | 748.40  | K      | 343.21 | 172.11 | 3 |
| 7 | 410.22 | 819.44  | Acetyl | 272.17 | 136.59 | 2 |
| 8 | 458.75 | 916.49  | A      | 175.12 | 88.06  | 1 |
| 9 | 536.80 | 1072.59 | P      |        |        |   |
|   |        |         | R      |        |        |   |

# H3\_K9-R17:

## KMe2SPoTGGKAcAPR

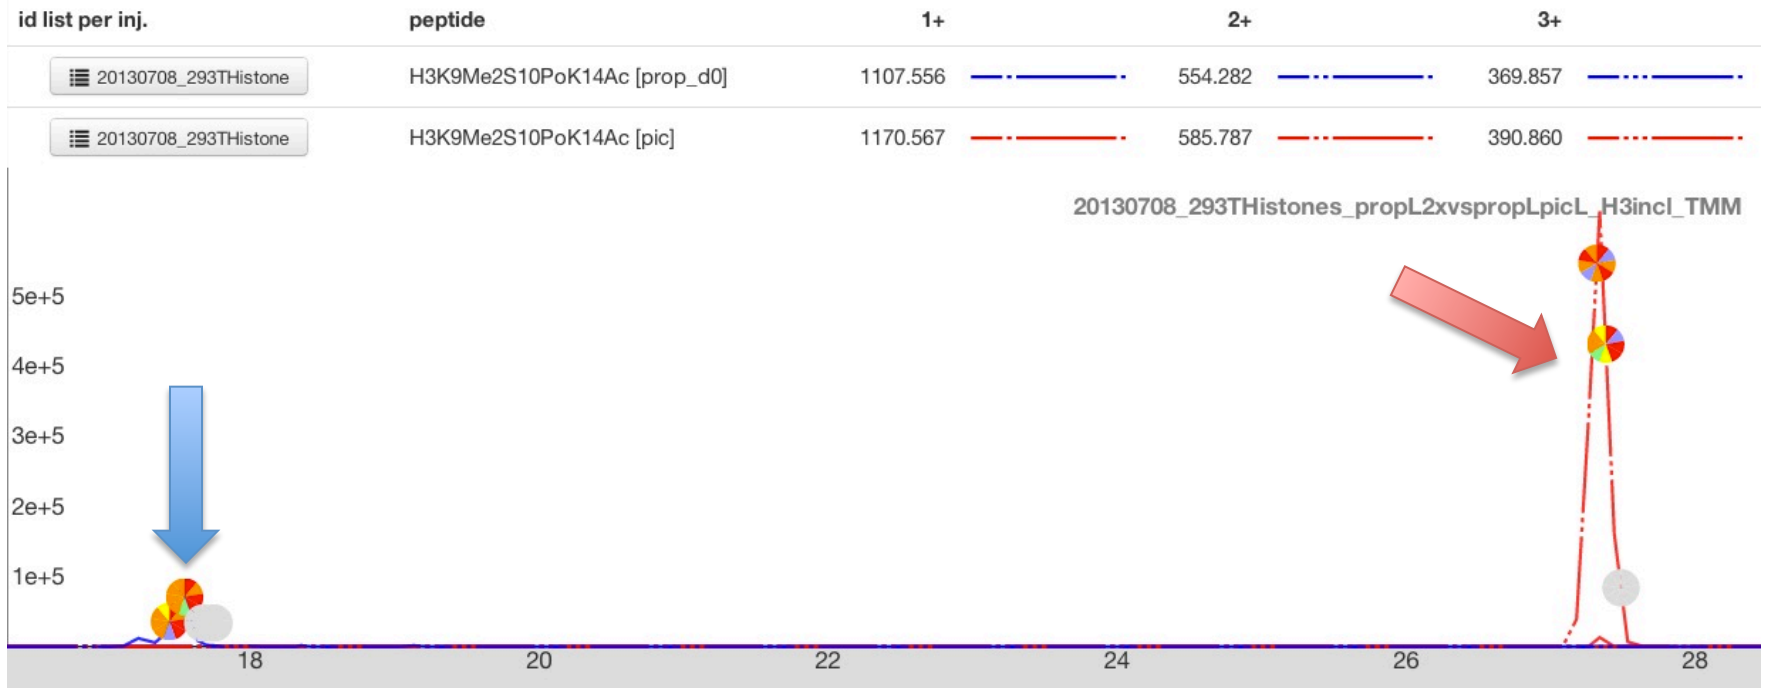

### Quanti event: 16.6-18.2min

| injection                                           | peptide                     | charge | m/z       | auc    |
|-----------------------------------------------------|-----------------------------|--------|-----------|--------|
| 20130708_293THistones_propL2xvspropLpicL_H3incl_TMM | H3K9Me2S10PoK14Ac [prop_d0] | 1      | 1107.5558 | 0.0e+0 |
| 20130708_293THistones_propL2xvspropLpicL_H3incl_TMM | H3K9Me2S10PoK14Ac [pic]     | 1      | 1170.5667 | 0.0e+0 |
| 20130708_293THistones_propL2xvspropLpicL_H3incl_TMM | H3K9Me2S10PoK14Ac [prop_d0] | 2      | 554.2815  | 7.5e+5 |
| 20130708_293THistones_propL2xvspropLpicL_H3incl_TMM | H3K9Me2S10PoK14Ac [pic]     | 2      | 585.7870  | 0.0e+0 |
| 20130708_293THistones_propL2xvspropLpicL_H3incl_TMM | H3K9Me2S10PoK14Ac [prop_d0] | 3      | 369.8568  | 0.0e+0 |
| 20130708_293THistones_propL2xvspropLpicL_H3incl_TMM | H3K9Me2S10PoK14Ac [pic]     | 3      | 390.8604  | 0.0e+0 |

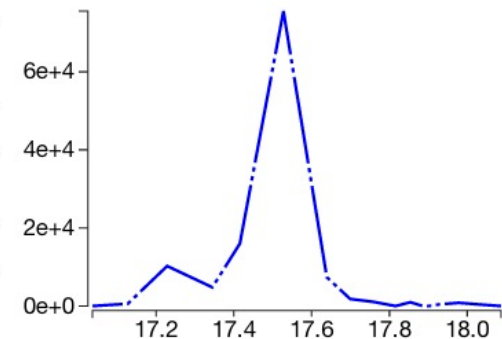

### Quanti event: 26.7-28.1min

| injection                                           | peptide                     | charge | m/z       | auc    |
|-----------------------------------------------------|-----------------------------|--------|-----------|--------|
| 20130708_293THistones_propL2xvspropLpicL_H3incl_TMM | H3K9Me2S10PoK14Ac [prop_d0] | 1      | 1107.5558 | 0.0e+0 |
| 20130708_293THistones_propL2xvspropLpicL_H3incl_TMM | H3K9Me2S10PoK14Ac [pic]     | 1      | 1170.5667 | 6.1e+4 |
| 20130708_293THistones_propL2xvspropLpicL_H3incl_TMM | H3K9Me2S10PoK14Ac [prop_d0] | 2      | 554.2815  | 0.0e+0 |
| 20130708_293THistones_propL2xvspropLpicL_H3incl_TMM | H3K9Me2S10PoK14Ac [pic]     | 2      | 585.7870  | 5.3e+6 |
| 20130708_293THistones_propL2xvspropLpicL_H3incl_TMM | H3K9Me2S10PoK14Ac [prop_d0] | 3      | 369.8568  | 0.0e+0 |
| 20130708_293THistones_propL2xvspropLpicL_H3incl_TMM | H3K9Me2S10PoK14Ac [pic]     | 3      | 390.8604  | 0.0e+0 |

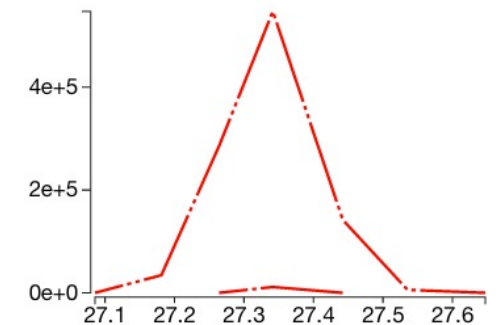



### Experimental spectrum

scan 2133  
 retention time 17.5min  
 precursor m/z 554.2807  
 precursor charge 2+

### Theoretical

M H<sup>2+</sup> 554.2815  
 MH Δ<sub>mass</sub> Da -0.0017  
 MH Δ<sub>mass</sub> ppm -1.5

### edit peptide

{Propionyl}K{Dimethyl}S{Phospho}TGGK{Acetyl}APR align

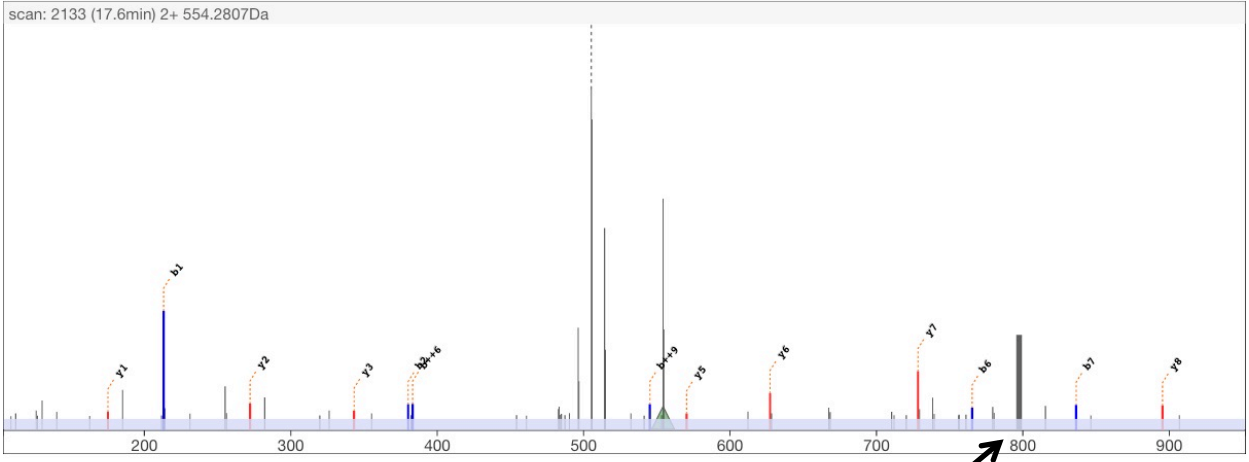

| Anchor        | Current         |
|---------------|-----------------|
| click on peak | mouse over peak |
| m/z 895.4067  | m/z 797.4252    |
| intensity 405 | intensity 2514  |
| int. rank 16  | int. rank 64    |

**Explanation?**  
 delta mass could be...  
 Δ<sub>m/z</sub> -97.98145

**Tune the seq**  
 Align anchor peak

y8 – H3PO4

|   | b++    | b       | y       | y++    |   |
|---|--------|---------|---------|--------|---|
|   |        |         | 1051.53 | 526.27 | 9 |
| 1 | 107.08 | 213.16  | 895.40  | 448.21 | 8 |
| 2 | 190.58 | 380.16  | 728.40  | 364.71 | 7 |
| 3 | 241.11 | 481.21  | 627.36  | 314.18 | 6 |
| 4 | 269.62 | 538.23  | 570.34  | 285.67 | 5 |
| 5 | 298.13 | 595.25  | 513.31  | 257.16 | 4 |
| 6 | 383.18 | 765.35  | 343.21  | 172.11 | 3 |
| 7 | 418.70 | 836.39  | 272.17  | 136.59 | 2 |
| 8 | 467.23 | 933.44  | 175.12  | 88.06  | 1 |
| 9 | 545.28 | 1089.55 |         |        |   |

Propionyl  
 K  
 Dimethyl  
 S  
 Phospho  
 T  
 G  
 G  
 K  
 Acetyl  
 A  
 P  
 R

### Experimental spectrum

scan 3760  
 retention time 27.3min  
 precursor m/z 585.7858  
 precursor charge 2+

### Theoretical

M H<sup>2+</sup> 585.7870  
 MH  $\Delta_{mass}$  Da -0.0024  
 MH  $\Delta_{mass}$  ppm -2.1

### edit peptide

{PIC}K{Dimethyl}S{Phospho}TGGK{Acetyl}APR

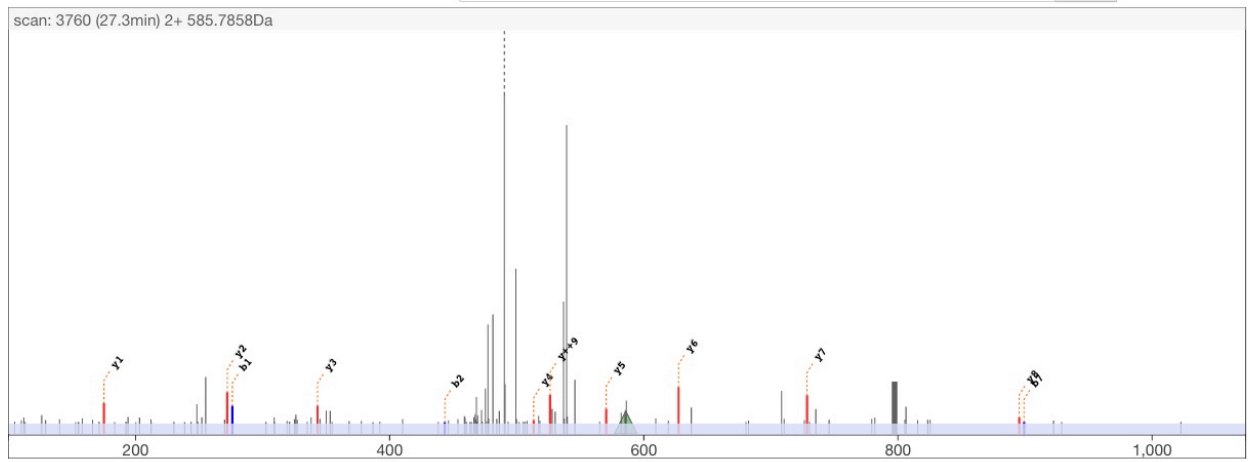

| Anchor        |          | Current         |          |
|---------------|----------|-----------------|----------|
| click on peak |          | mouse over peak |          |
| m/z           | 895.4056 | m/z             | 797.4261 |
| intensity     | 799      | intensity       | 5590     |
| int. rank     | 40       | int. rank       | 3        |

**Explanation?**  
 delta mass could be...  
 $\Delta_{m/z}$  -97.97949

**Tune the seq**  
 Align anchor peak

y8 – H3PO4

|   | b++    | b       |         | y       | y++    |   |
|---|--------|---------|---------|---------|--------|---|
|   | 60.53  | 120.04  | PIC     | 1051.53 | 526.27 | 9 |
| 1 | 138.59 | 276.17  | K       | 895.40  | 448.21 | 8 |
| 2 | 222.09 | 443.17  | S       | 728.40  | 364.71 | 7 |
| 3 | 272.61 | 544.22  | Phospho | 627.36  | 314.18 | 6 |
| 4 | 301.12 | 601.24  | T       | 570.34  | 285.67 | 5 |
| 5 | 329.63 | 658.26  | G       | 513.31  | 257.16 | 4 |
| 6 | 414.69 | 828.37  | K       | 343.21  | 172.11 | 3 |
| 7 | 450.20 | 899.40  | Acetyl  | 272.17  | 136.59 | 2 |
| 8 | 498.73 | 996.46  | A       | 175.12  | 88.06  | 1 |
| 9 | 576.78 | 1152.56 | P       |         |        |   |
|   |        |         | R       |         |        |   |

# H3\_K9-R17:

KMe2SorTPropGGKAcAPR

Peak contains overlapping spectra for either PTM. S10prop shown.

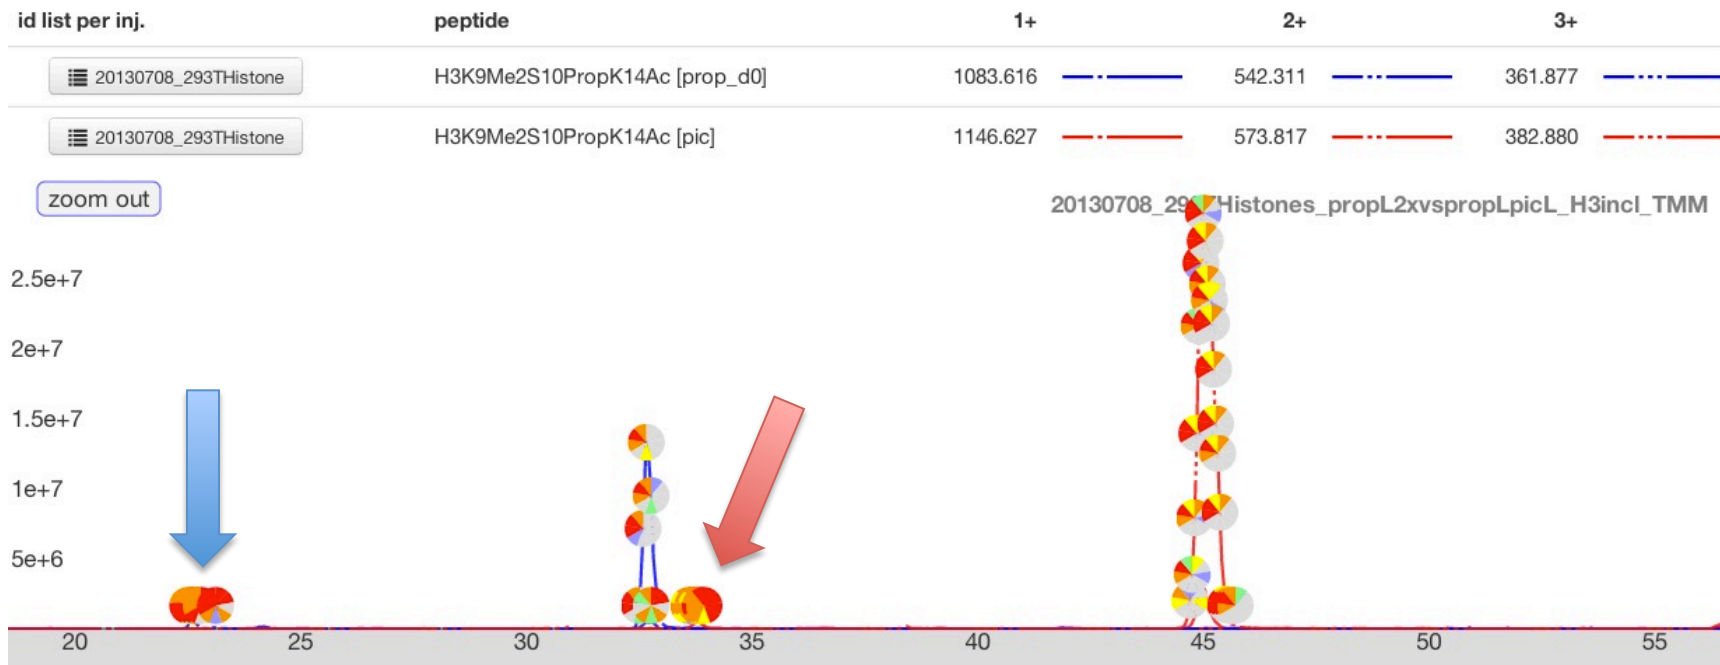

## Quanti event: 22.2-23.5min

| injection                                           | peptide                       | charge | m/z       | auc    |
|-----------------------------------------------------|-------------------------------|--------|-----------|--------|
| 20130708_293THistones_propL2xvspropLpicL_H3incl_TMM | H3K9Me2S10PropK14Ac [prop_d0] | 1      | 1083.6157 | 0.0e+0 |
| 20130708_293THistones_propL2xvspropLpicL_H3incl_TMM | H3K9Me2S10PropK14Ac [pic]     | 1      | 1146.6266 | 0.0e+0 |
| 20130708_293THistones_propL2xvspropLpicL_H3incl_TMM | H3K9Me2S10PropK14Ac [prop_d0] | 2      | 542.3115  | 9.5e+6 |
| 20130708_293THistones_propL2xvspropLpicL_H3incl_TMM | H3K9Me2S10PropK14Ac [pic]     | 2      | 573.8169  | 0.0e+0 |
| 20130708_293THistones_propL2xvspropLpicL_H3incl_TMM | H3K9Me2S10PropK14Ac [prop_d0] | 3      | 361.8767  | 0.0e+0 |

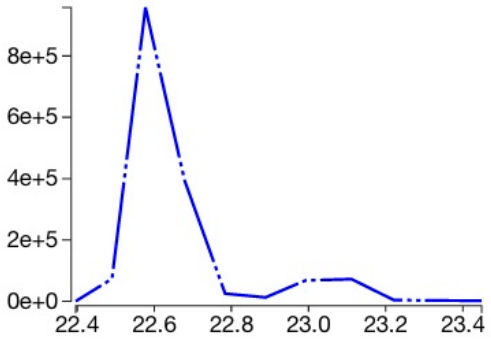

## Quanti event: 33.2-34.3min

| injection                                           | peptide                       | charge | m/z       | auc    |
|-----------------------------------------------------|-------------------------------|--------|-----------|--------|
| 20130708_293THistones_propL2xvspropLpicL_H3incl_TMM | H3K9Me2S10PropK14Ac [prop_d0] | 1      | 1083.6157 | 0.0e+0 |
| 20130708_293THistones_propL2xvspropLpicL_H3incl_TMM | H3K9Me2S10PropK14Ac [pic]     | 1      | 1146.6266 | 0.0e+0 |
| 20130708_293THistones_propL2xvspropLpicL_H3incl_TMM | H3K9Me2S10PropK14Ac [prop_d0] | 2      | 542.3115  | 1.1e+6 |
| 20130708_293THistones_propL2xvspropLpicL_H3incl_TMM | H3K9Me2S10PropK14Ac [pic]     | 2      | 573.8169  | 7.4e+6 |
| 20130708_293THistones_propL2xvspropLpicL_H3incl_TMM | H3K9Me2S10PropK14Ac [prop_d0] | 3      | 361.8767  | 0.0e+0 |
| 20130708_293THistones_propL2xvspropLpicL_H3incl_TMM | H3K9Me2S10PropK14Ac [pic]     | 3      | 382.8804  | 2.8e+5 |

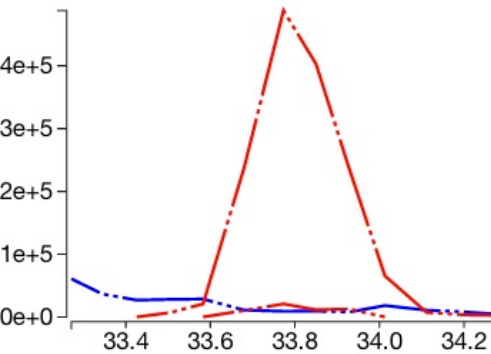

# H3\_K9-R17: Prop-KMe2SPropTGGKAcAPR MS/MS

### Experimental spectrum

scan 2859  
 retention time 22.5min  
 precursor m/z 542.3109  
 precursor charge 2+

### Theoretical

M H<sup>2+</sup> 542.3115  
 MH Δ<sub>mass</sub> Da -0.0013  
 MH Δ<sub>mass</sub> ppm -1.2

### edit peptide

{Propionyl}K{Dimethyl}S{Propionyl}TGGK{Acetyl}APR align

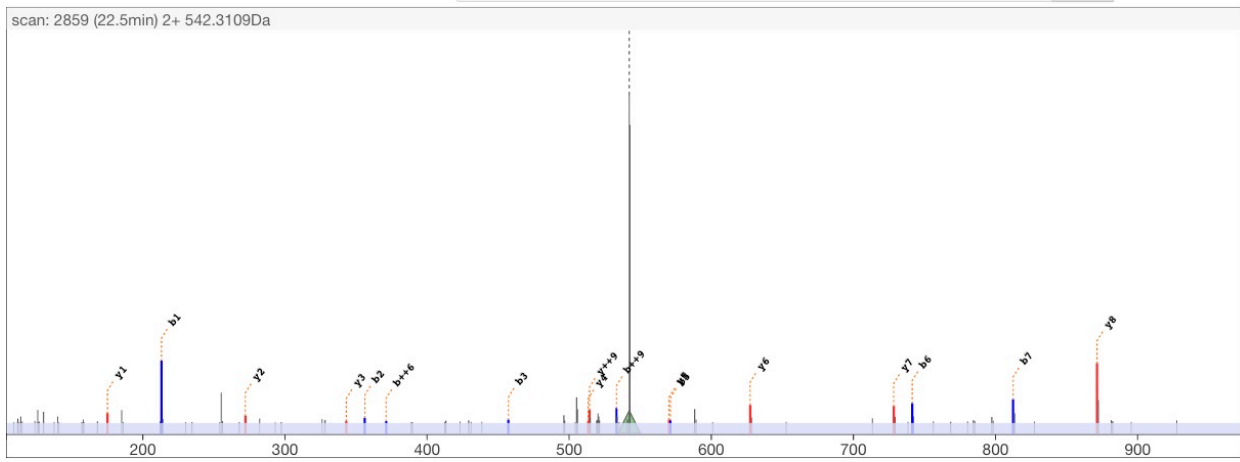

|   | b++    | b       | y       | y++    |   |
|---|--------|---------|---------|--------|---|
|   |        |         | 1027.59 | 514.30 | 9 |
| 1 | 107.08 | 213.16  | 871.46  | 436.24 | 8 |
| 2 | 178.61 | 356.22  | 728.40  | 364.71 | 7 |
| 3 | 229.14 | 457.27  | 627.36  | 314.18 | 6 |
| 4 | 257.65 | 514.29  | 570.34  | 285.67 | 5 |
| 5 | 286.16 | 571.31  | 513.31  | 257.16 | 4 |
| 6 | 371.21 | 741.41  | 343.21  | 172.11 | 3 |
| 7 | 406.73 | 812.45  | 272.17  | 136.59 | 2 |
| 8 | 455.26 | 909.50  | 175.12  | 88.06  | 1 |
| 9 | 533.31 | 1065.61 |         |        |   |

Propionyl  
 K  
 Dimethyl  
 S  
 Propionyl  
 T  
 G  
 K  
 Acetyl  
 A  
 P  
 R

### Experimental spectrum

scan 5091  
 retention time 33.9min  
 precursor m/z 573.8165  
 precursor charge 2+

### Theoretical

M H<sup>2+</sup> 573.8169  
 MH Δ<sub>mass</sub> Da -0.0008  
 MH Δ<sub>mass</sub> ppm -0.7

### edit peptide

{PIC}K{Dimethyl}S{Propionyl}TGGK{Acetyl}APR align

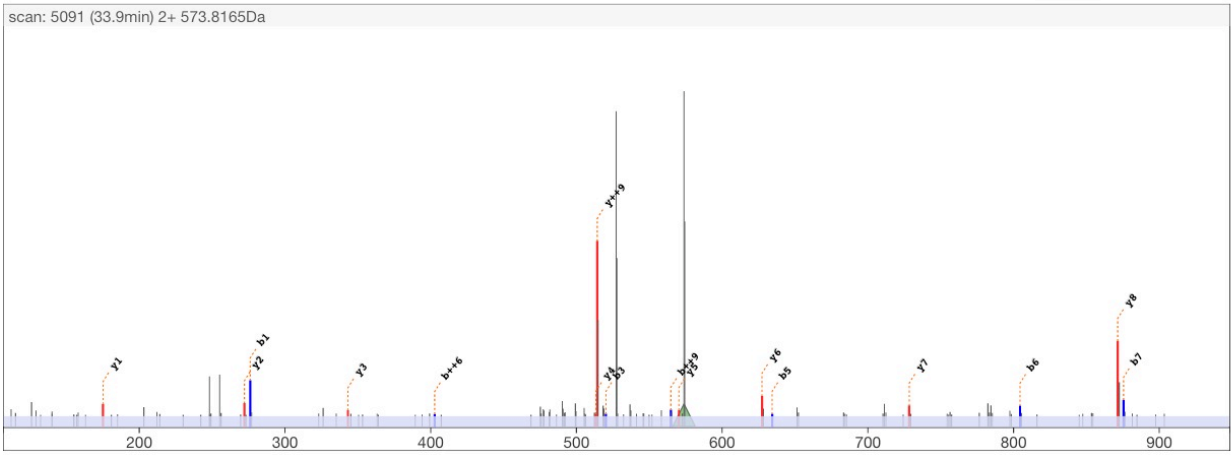

|   | b++    | b       |             | y       | y++    |   |
|---|--------|---------|-------------|---------|--------|---|
|   | 60.53  | 120.04  | PIC         | 1027.59 | 514.30 | 9 |
| 1 | 138.59 | 276.17  | K           | 871.46  | 436.24 | 8 |
| 2 | 210.12 | 419.23  | Dimethyl S  | 728.40  | 364.71 | 7 |
| 3 | 260.64 | 520.28  | Propionyl T | 627.36  | 314.18 | 6 |
| 4 | 289.15 | 577.30  | G           | 570.34  | 285.67 | 5 |
| 5 | 317.66 | 634.32  | G           | 513.31  | 257.16 | 4 |
| 6 | 402.72 | 804.43  | K           | 343.21  | 172.11 | 3 |
| 7 | 438.23 | 875.46  | Acetyl A    | 272.17  | 136.59 | 2 |
| 8 | 486.76 | 972.51  | P           | 175.12  | 88.06  | 1 |
| 9 | 564.81 | 1128.62 | R           |         |        |   |

# H3\_K9-R17:

## KMe3STGGKAcAPR

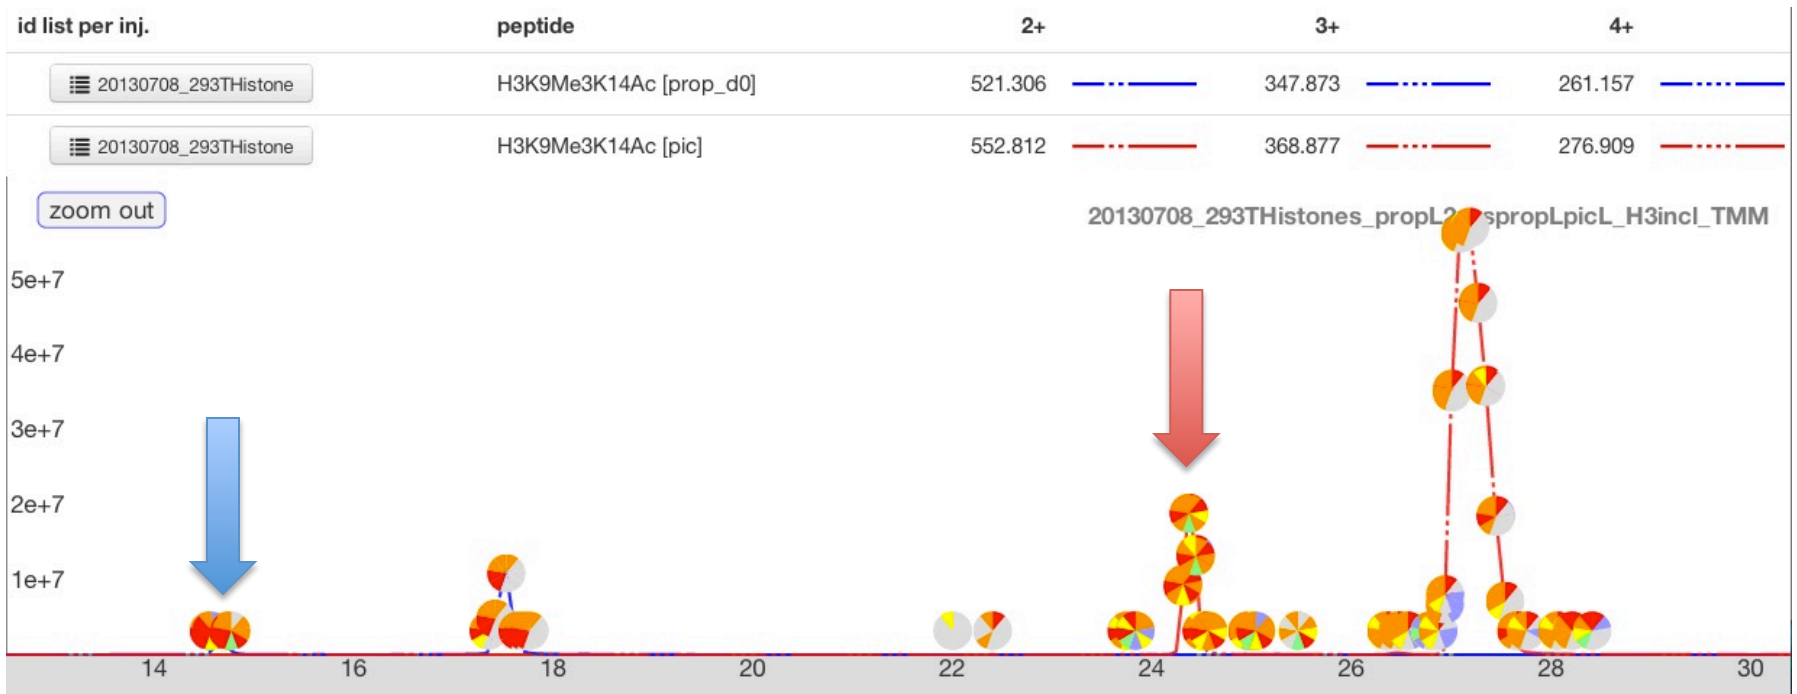

### Quanti event: 13.6-15.6min

| injection                                           | peptide                | charge | m/z       | auc    |
|-----------------------------------------------------|------------------------|--------|-----------|--------|
| 20130708_293THistones_propL2xvspropLpicL_H3incl_TMM | H3K9Me3K14Ac [prop_d0] | 1      | 1041.6051 | 0.0e+0 |
| 20130708_293THistones_propL2xvspropLpicL_H3incl_TMM | H3K9Me3K14Ac [pic]     | 1      | 1104.6160 | 0.0e+0 |
| 20130708_293THistones_propL2xvspropLpicL_H3incl_TMM | H3K9Me3K14Ac [prop_d0] | 2      | 521.3062  | 2.1e+7 |
| 20130708_293THistones_propL2xvspropLpicL_H3incl_TMM | H3K9Me3K14Ac [pic]     | 2      | 552.8116  | 0.0e+0 |
| 20130708_293THistones_propL2xvspropLpicL_H3incl_TMM | H3K9Me3K14Ac [prop_d0] | 3      | 347.8732  | 0.0e+0 |
| 20130708_293THistones_propL2xvspropLpicL_H3incl_TMM | H3K9Me3K14Ac [pic]     | 3      | 368.8769  | 0.0e+0 |

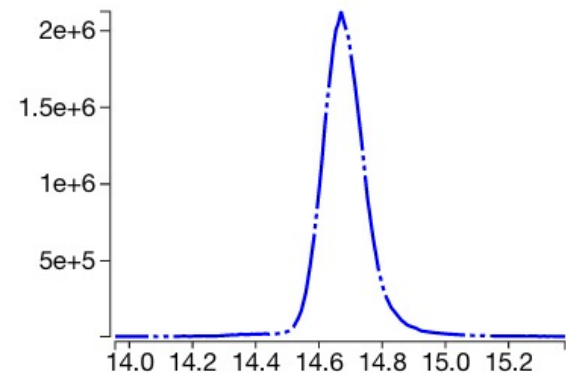

### Quanti event: 23.5-25.2min

| injection                                           | peptide                | charge | m/z       | auc    |
|-----------------------------------------------------|------------------------|--------|-----------|--------|
| 20130708_293THistones_propL2xvspropLpicL_H3incl_TMM | H3K9Me3K14Ac [prop_d0] | 1      | 1041.6051 | 0.0e+0 |
| 20130708_293THistones_propL2xvspropLpicL_H3incl_TMM | H3K9Me3K14Ac [pic]     | 1      | 1104.6160 | 3.6e+4 |
| 20130708_293THistones_propL2xvspropLpicL_H3incl_TMM | H3K9Me3K14Ac [prop_d0] | 2      | 521.3062  | 2.0e+5 |
| 20130708_293THistones_propL2xvspropLpicL_H3incl_TMM | H3K9Me3K14Ac [pic]     | 2      | 552.8116  | 1.8e+8 |
| 20130708_293THistones_propL2xvspropLpicL_H3incl_TMM | H3K9Me3K14Ac [prop_d0] | 3      | 347.8732  | 0.0e+0 |
| 20130708_293THistones_propL2xvspropLpicL_H3incl_TMM | H3K9Me3K14Ac [pic]     | 3      | 368.8769  | 0.0e+0 |

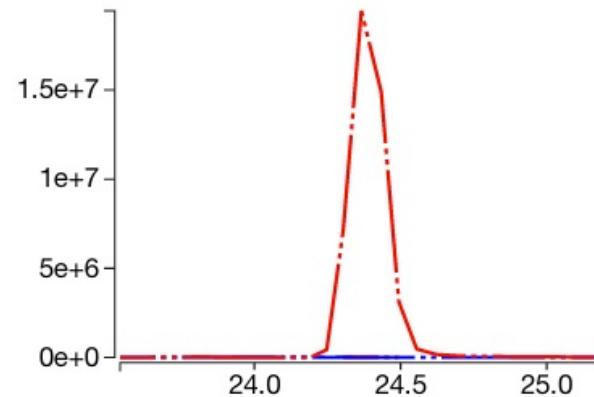



### Experimental spectrum

scan 1764  
 retention time 14.6min  
 precursor m/z 521.3055  
 precursor charge 2+

### Theoretical

M H<sup>2+</sup> 521.3062  
 MH Δ<sub>mass</sub> Da -0.0013  
 MH Δ<sub>mass</sub> ppm -1.3

### edit peptide

{Propionyl}K{Trimethyl}STGGK{Acetyl}APR align

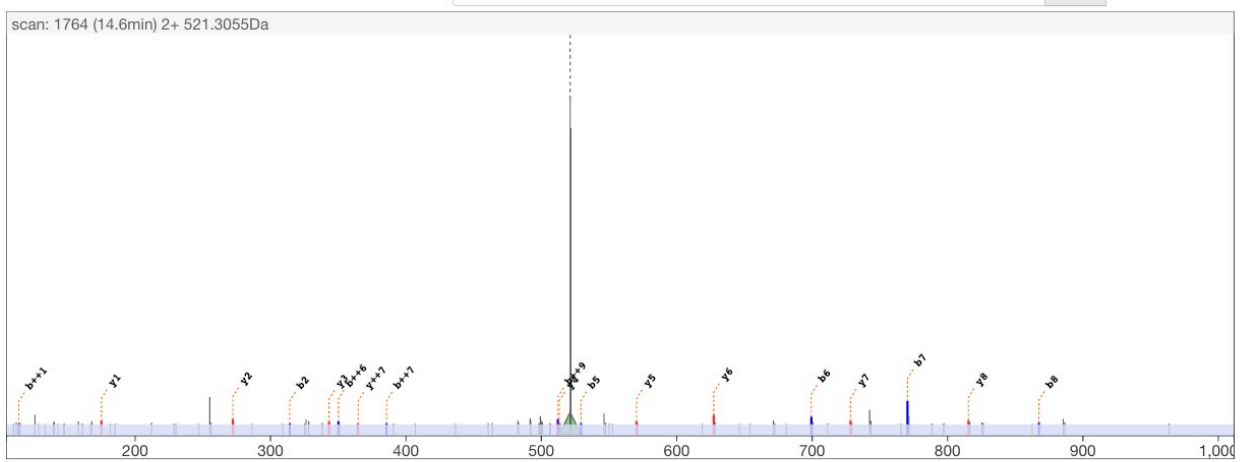

|   | b++    | b       |           | y      | y++    |   |
|---|--------|---------|-----------|--------|--------|---|
|   |        |         | Propionyl | 985.58 | 493.29 | 9 |
| 1 | 114.09 | 227.18  | K         | 815.44 | 408.22 | 8 |
| 2 | 157.61 | 314.21  | S         | 728.40 | 364.71 | 7 |
| 3 | 208.13 | 415.26  | T         | 627.36 | 314.18 | 6 |
| 4 | 236.64 | 472.28  | G         | 570.34 | 285.67 | 5 |
| 5 | 265.15 | 529.30  | G         | 513.31 | 257.16 | 4 |
| 6 | 350.21 | 699.40  | K         | 343.21 | 172.11 | 3 |
| 7 | 385.72 | 770.44  | Acetyl    | 272.17 | 136.59 | 2 |
| 8 | 434.25 | 867.49  | A         | 175.12 | 88.06  | 1 |
| 9 | 512.30 | 1023.59 | P         |        |        |   |
|   |        |         | R         |        |        |   |

### Experimental spectrum

scan 3211  
 retention time 24.4min  
 precursor m/z 552.8115  
 precursor charge 2+

### Theoretical

M H<sup>2+</sup> 552.8116  
 MH  $\Delta_{mass}$  Da -0.0004  
 MH  $\Delta_{mass}$  ppm -0.3

### edit peptide

{PIC}K{Trimethyl}STGGK{Acetyl}APR

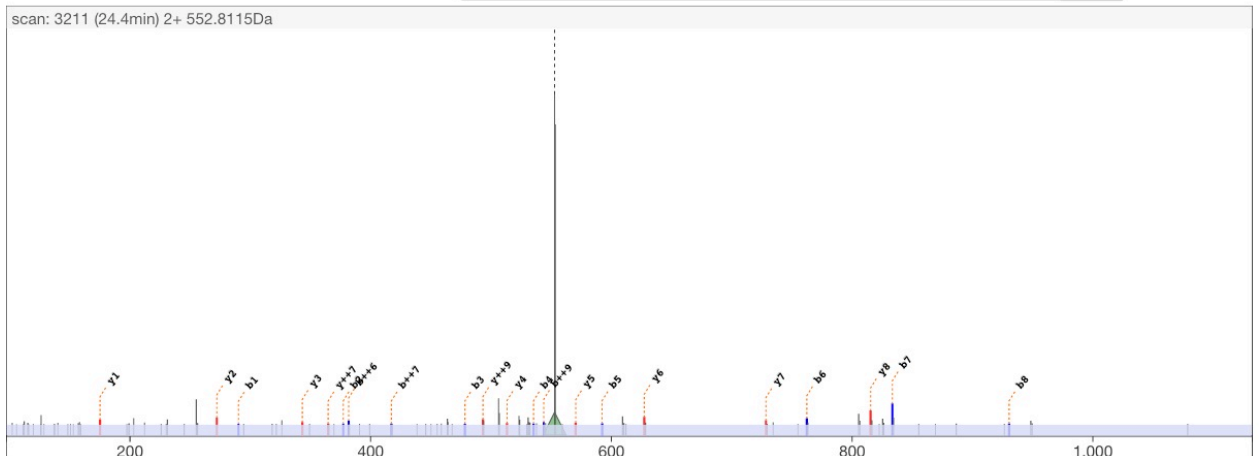

|   | b++    | b       |                | y      | y++    |   |
|---|--------|---------|----------------|--------|--------|---|
|   | 60.53  | 120.04  | PIC            | 985.58 | 493.29 | 9 |
| 1 | 145.60 | 290.19  | K<br>Trimethyl | 815.44 | 408.22 | 8 |
| 2 | 189.11 | 377.22  | S              | 728.40 | 364.71 | 7 |
| 3 | 239.64 | 478.27  | T              | 627.36 | 314.18 | 6 |
| 4 | 268.15 | 535.29  | G              | 570.34 | 285.67 | 5 |
| 5 | 296.66 | 592.31  | K<br>Acetyl    | 513.31 | 257.16 | 4 |
| 6 | 381.71 | 762.41  | A              | 343.21 | 172.11 | 3 |
| 7 | 417.23 | 833.45  | P              | 272.17 | 136.59 | 2 |
| 8 | 465.76 | 930.50  | R              | 175.12 | 88.06  | 1 |
| 9 | 543.81 | 1086.61 |                |        |        |   |

# H3\_K9-R17:

## KMe3SPoTGGKAcAPR

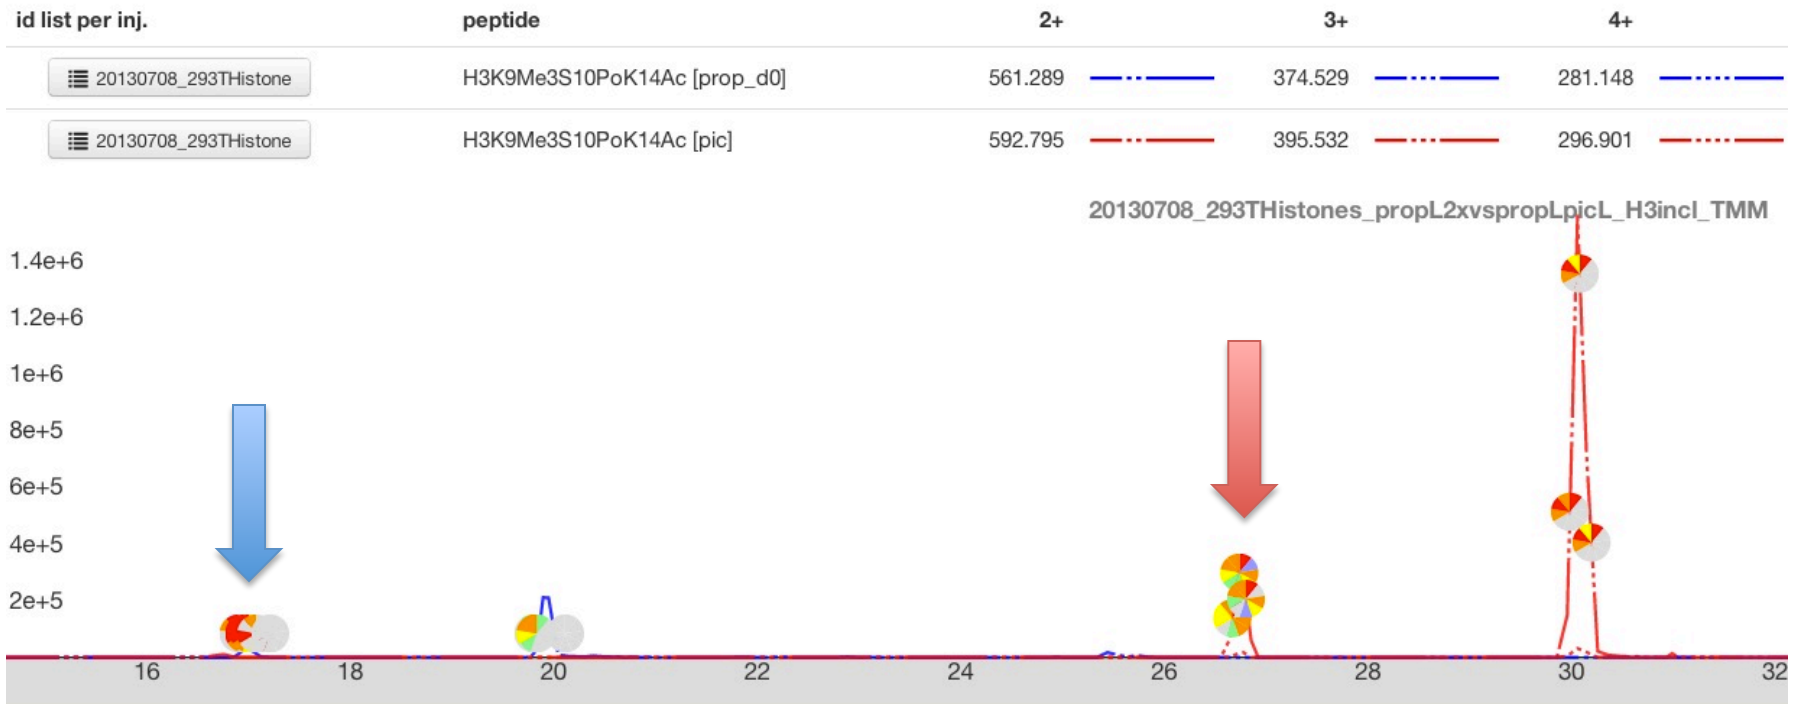

### Quanti event: 16.7-17.4min

| injection                                           | peptide                     | charge | m/z      | auc    |
|-----------------------------------------------------|-----------------------------|--------|----------|--------|
| 20130708_293THistones_propL2xvspropLpicL_H3incl_TMM | H3K9Me3S10PoK14Ac [prop_d0] | 2      | 561.2894 | 2.9e+5 |
| 20130708_293THistones_propL2xvspropLpicL_H3incl_TMM | H3K9Me3S10PoK14Ac [pic]     | 2      | 592.7948 | 0.0e+0 |
| 20130708_293THistones_propL2xvspropLpicL_H3incl_TMM | H3K9Me3S10PoK14Ac [prop_d0] | 3      | 374.5287 | 0.0e+0 |
| 20130708_293THistones_propL2xvspropLpicL_H3incl_TMM | H3K9Me3S10PoK14Ac [pic]     | 3      | 395.5323 | 3.6e+4 |
| 20130708_293THistones_propL2xvspropLpicL_H3incl_TMM | H3K9Me3S10PoK14Ac [prop_d0] | 4      | 281.1483 | 0.0e+0 |
| 20130708_293THistones_propL2xvspropLpicL_H3incl_TMM | H3K9Me3S10PoK14Ac [pic]     | 4      | 296.9010 | 0.0e+0 |

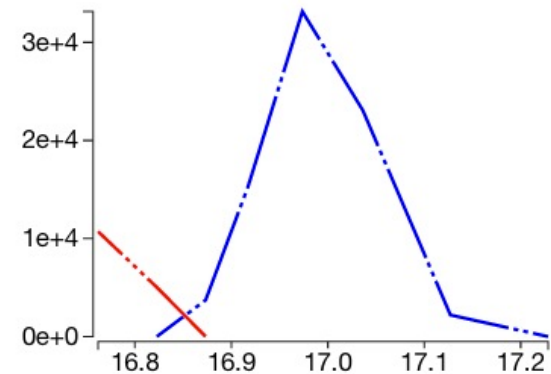

### Quanti event: 26.3-27.3min

| injection                                           | peptide                     | charge | m/z      | auc    |
|-----------------------------------------------------|-----------------------------|--------|----------|--------|
| 20130708_293THistones_propL2xvspropLpicL_H3incl_TMM | H3K9Me3S10PoK14Ac [prop_d0] | 2      | 561.2894 | 0.0e+0 |
| 20130708_293THistones_propL2xvspropLpicL_H3incl_TMM | H3K9Me3S10PoK14Ac [pic]     | 2      | 592.7948 | 2.9e+6 |
| 20130708_293THistones_propL2xvspropLpicL_H3incl_TMM | H3K9Me3S10PoK14Ac [prop_d0] | 3      | 374.5287 | 0.0e+0 |
| 20130708_293THistones_propL2xvspropLpicL_H3incl_TMM | H3K9Me3S10PoK14Ac [pic]     | 3      | 395.5323 | 1.2e+5 |
| 20130708_293THistones_propL2xvspropLpicL_H3incl_TMM | H3K9Me3S10PoK14Ac [prop_d0] | 4      | 281.1483 | 0.0e+0 |
| 20130708_293THistones_propL2xvspropLpicL_H3incl_TMM | H3K9Me3S10PoK14Ac [pic]     | 4      | 296.9010 | 0.0e+0 |

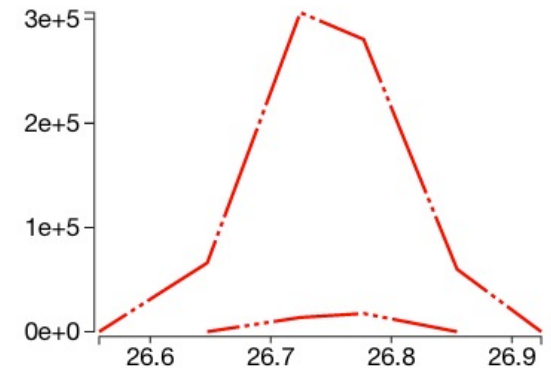

### Experimental spectrum

scan 2063  
 retention time 17.0min  
 precursor m/z 561.2885  
 precursor charge 2+

### Theoretical

M H<sup>2+</sup> 561.2894  
 MH  $\Delta_{mass}$  Da -0.0018  
 MH  $\Delta_{mass}$  ppm -1.6

precursor – H3PO4

### edit peptide

{Propionyl}K{Trimethyl}S{Phospho}TGGK{Acetyl}APR align

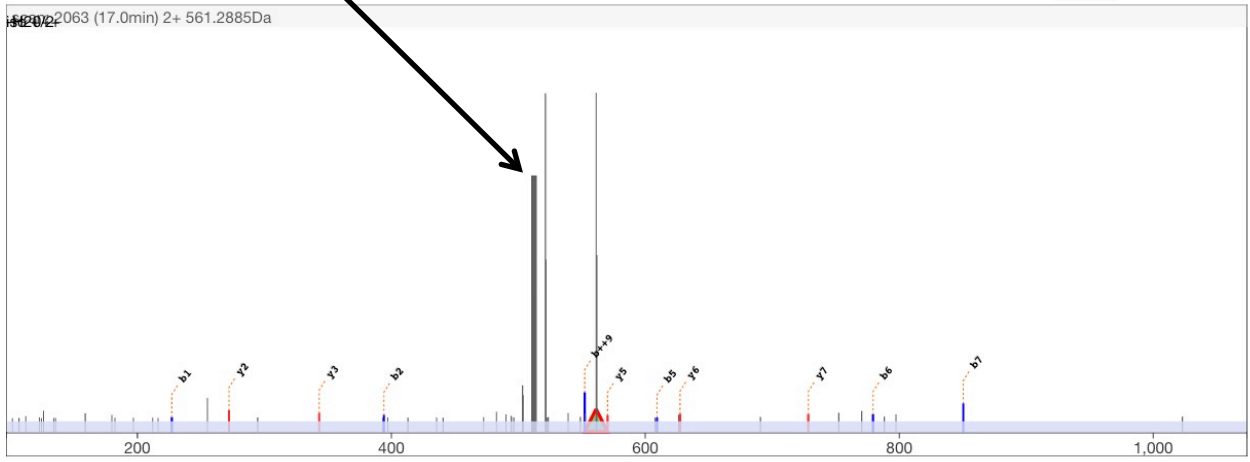

| Anchor        | Current         |
|---------------|-----------------|
| click on peak | mouse over peak |
| m/z 561.2885  | m/z 512.2998    |
| intensity NaN | intensity 6090  |
| int. rank     | int. rank 52    |

**Explanation?**  
 delta mass could be...  
 $\Delta_{m/z}$  -48.98865

**Tune the seq**  
 Align anchor peak

|   | b++    | b       |           | y       | y++    |   |
|---|--------|---------|-----------|---------|--------|---|
|   |        |         | Propionyl | 1065.55 | 533.28 | 9 |
| 1 | 114.09 | 227.18  | K         | 895.40  | 448.21 | 8 |
|   |        |         | Trimethyl |         |        |   |
| 2 | 197.59 | 394.17  | S         | 728.40  | 364.71 | 7 |
|   |        |         | Phospho   |         |        |   |
| 3 | 248.11 | 495.22  | T         | 627.36  | 314.18 | 6 |
|   |        |         | G         |         |        |   |
| 4 | 276.63 | 552.24  | G         | 570.34  | 285.67 | 5 |
|   |        |         | G         |         |        |   |
| 5 | 305.14 | 609.26  | K         | 513.31  | 257.16 | 4 |
|   |        |         | Acetyl    |         |        |   |
| 6 | 390.19 | 779.37  | A         | 343.21  | 172.11 | 3 |
|   |        |         | P         |         |        |   |
| 7 | 425.71 | 850.41  | R         | 272.17  | 136.59 | 2 |
|   |        |         |           |         |        |   |
| 8 | 474.23 | 947.46  |           | 175.12  | 88.06  | 1 |
|   |        |         |           |         |        |   |
| 9 | 552.28 | 1103.56 |           |         |        |   |

### Experimental spectrum

scan 3644  
 retention time 26.7min  
 precursor m/z 592.7941  
 precursor charge 2+

### Theoretical

MH<sup>2+</sup> 592.7948  
 MH Δ<sub>mass</sub> Da -0.0015  
 MH Δ<sub>mass</sub> ppm -1.3

### edit peptide

{PIC}K[Trimethyl]S[Phospho]TGGK[Acetyl]APR

precursor – H3PO4

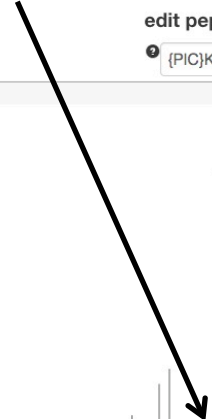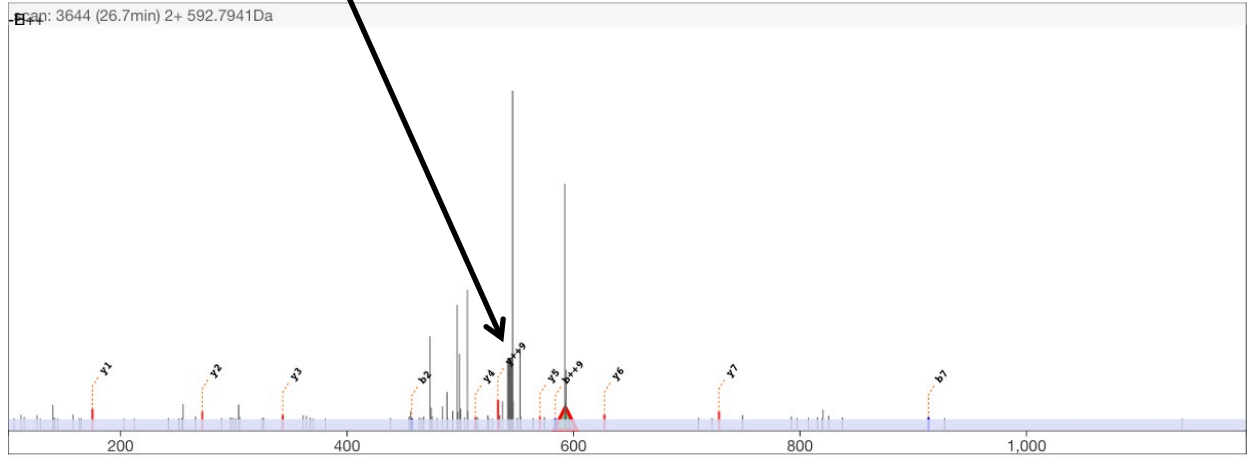

**Anchor**  
 click on peak  
 m/z 592.7941  
 intensity NaN  
 int. rank

**Current**  
 mouse over peak  
 m/z 543.8055  
 intensity 15927  
 int. rank 90

**Explanation?**  
 delta mass could be...  
 Δ<sub>m/z</sub> -48.98853

**Tune the seq**  
 Align anchor peak

|   | b++    | b       |                                                                                    | y       | y++    |   |
|---|--------|---------|------------------------------------------------------------------------------------|---------|--------|---|
|   | 60.53  | 120.04  | PIC<br>K<br>Trimethyl<br>S<br>Phospho<br>T<br>G<br>G<br>K<br>Acetyl<br>A<br>P<br>R | 1065.55 | 533.28 | 9 |
| 1 | 145.60 | 290.19  |                                                                                    | 895.40  | 448.21 | 8 |
| 2 | 229.10 | 457.18  |                                                                                    | 728.40  | 364.71 | 7 |
| 3 | 279.62 | 558.23  |                                                                                    | 627.36  | 314.18 | 6 |
| 4 | 308.13 | 615.25  |                                                                                    | 570.34  | 285.67 | 5 |
| 5 | 336.64 | 672.28  |                                                                                    | 513.31  | 257.16 | 4 |
| 6 | 421.69 | 842.38  |                                                                                    | 343.21  | 172.11 | 3 |
| 7 | 457.21 | 913.42  |                                                                                    | 272.17  | 136.59 | 2 |
| 8 | 505.74 | 1010.47 |                                                                                    | 175.12  | 88.06  | 1 |
| 9 | 583.79 | 1166.57 |                                                                                    |         |        |   |

# H3\_K9-R17:

# KMe3SorTPropGGKAcAPR

Peaks contain overlapping spectra for either PTM. S10prop shown.

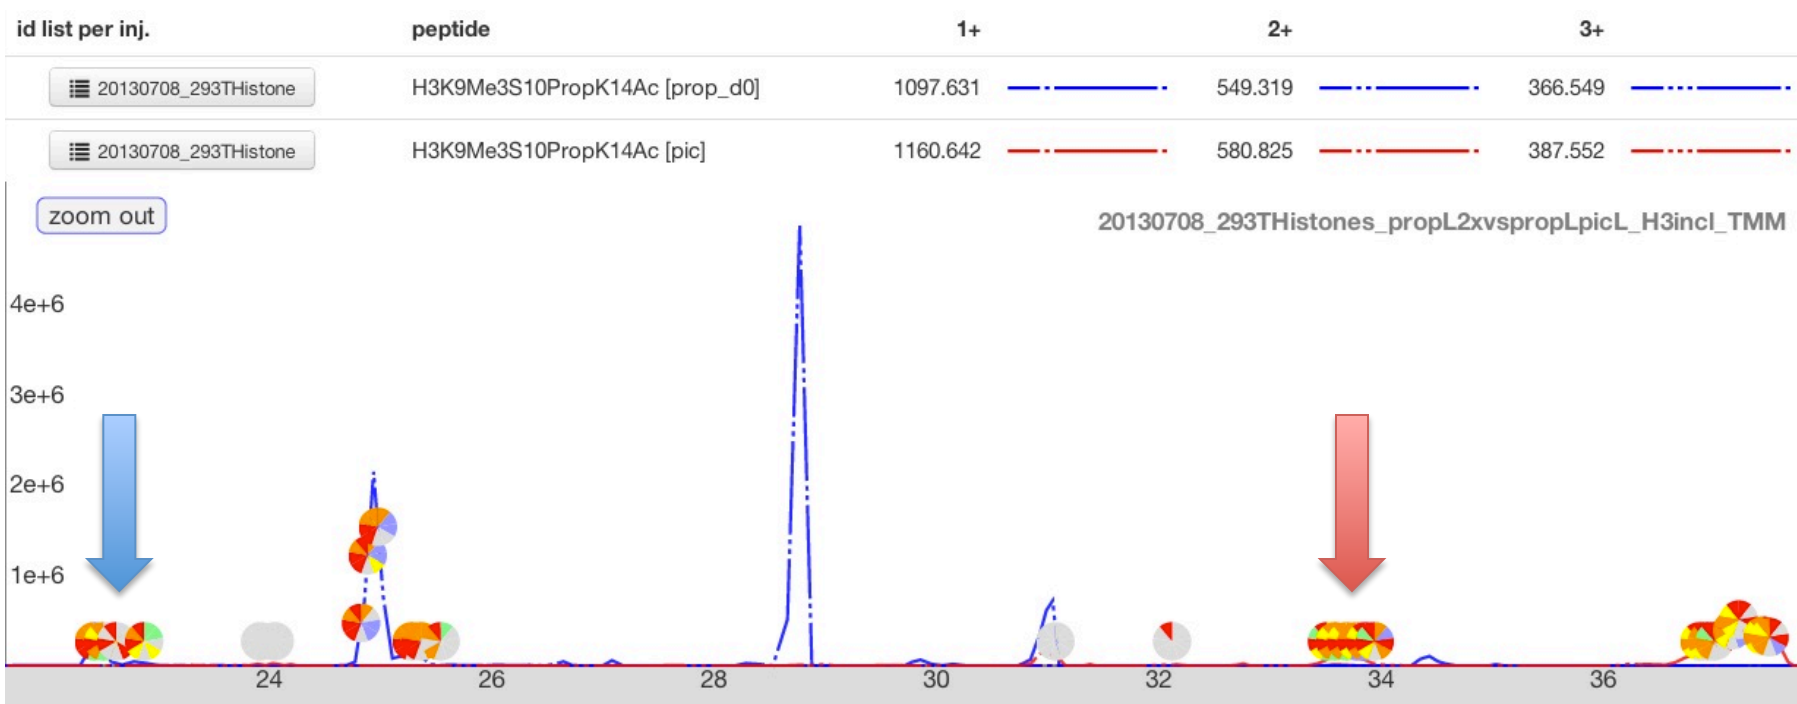

Quanti event: 22.2-22.7min

| injection                                           | peptide                       | charge | m/z       | auc    |
|-----------------------------------------------------|-------------------------------|--------|-----------|--------|
| 20130708_293THistones_propL2xvspropLpicL_H3incl_TMM | H3K9Me3S10PropK14Ac [prop_d0] | 1      | 1097.6313 | 0.0e+0 |
| 20130708_293THistones_propL2xvspropLpicL_H3incl_TMM | H3K9Me3S10PropK14Ac [pic]     | 1      | 1160.6422 | 0.0e+0 |
| 20130708_293THistones_propL2xvspropLpicL_H3incl_TMM | H3K9Me3S10PropK14Ac [prop_d0] | 2      | 549.3193  | 3.2e+6 |
| 20130708_293THistones_propL2xvspropLpicL_H3incl_TMM | H3K9Me3S10PropK14Ac [pic]     | 2      | 580.8248  | 0.0e+0 |
| 20130708_293THistones_propL2xvspropLpicL_H3incl_TMM | H3K9Me3S10PropK14Ac [prop_d0] | 3      | 366.5486  | 0.0e+0 |
| 20130708_293THistones_propL2xvspropLpicL_H3incl_TMM | H3K9Me3S10PropK14Ac [pic]     | 3      | 387.5523  | 0.0e+0 |

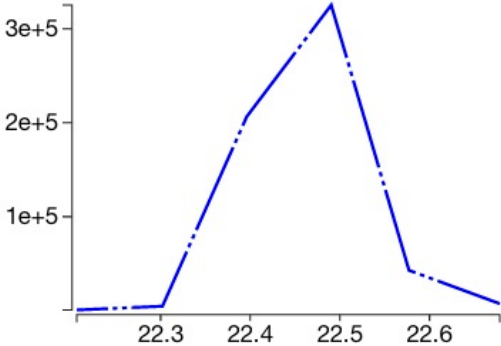

Quanti event: 33.3-34.2min

| injection                                           | peptide                       | charge | m/z       | auc    |
|-----------------------------------------------------|-------------------------------|--------|-----------|--------|
| 20130708_293THistones_propL2xvspropLpicL_H3incl_TMM | H3K9Me3S10PropK14Ac [prop_d0] | 1      | 1097.6313 | 0.0e+0 |
| 20130708_293THistones_propL2xvspropLpicL_H3incl_TMM | H3K9Me3S10PropK14Ac [pic]     | 1      | 1160.6422 | 0.0e+0 |
| 20130708_293THistones_propL2xvspropLpicL_H3incl_TMM | H3K9Me3S10PropK14Ac [prop_d0] | 2      | 549.3193  | 0.0e+0 |
| 20130708_293THistones_propL2xvspropLpicL_H3incl_TMM | H3K9Me3S10PropK14Ac [pic]     | 2      | 580.8248  | 2.9e+6 |
| 20130708_293THistones_propL2xvspropLpicL_H3incl_TMM | H3K9Me3S10PropK14Ac [prop_d0] | 3      | 366.5486  | 0.0e+0 |
| 20130708_293THistones_propL2xvspropLpicL_H3incl_TMM | H3K9Me3S10PropK14Ac [pic]     | 3      | 387.5523  | 1.0e+5 |

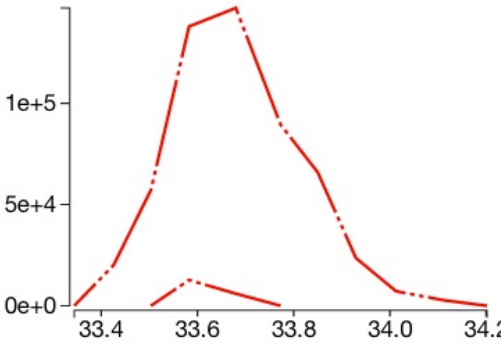



# H3\_K9-R17: Prop-KMe3SPropTGGKAcAPR MS/MS

### Experimental spectrum

scan 2846  
 retention time 22.4min  
 precursor m/z 549.3190  
 precursor charge 2+

### Theoretical

M H<sup>2+</sup> 549.3193  
 MH  $\Delta$ <sub>mass</sub> Da -0.0006  
 MH  $\Delta$ <sub>mass</sub> ppm -0.5

### edit peptide

{Propionyl}K{Trimethyl}S{Propionyl}TGGK{Acetyl}APR align

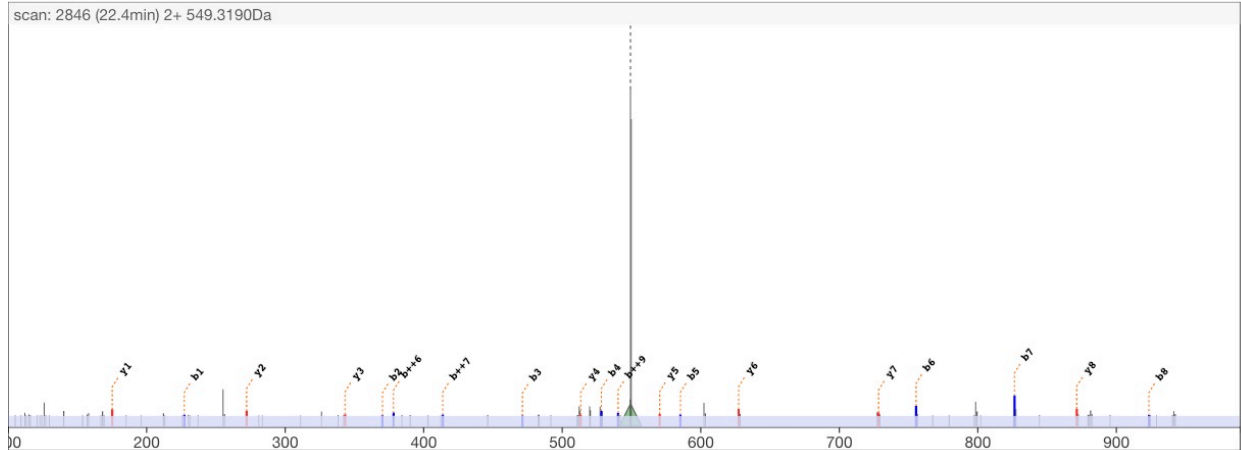

|   | b++    | b       |           | y       | y++    |   |
|---|--------|---------|-----------|---------|--------|---|
|   |        |         | Propionyl | 1041.61 | 521.31 | 9 |
| 1 | 114.09 | 227.18  | K         |         |        |   |
|   |        |         | Trimethyl | 871.46  | 436.24 | 8 |
| 2 | 185.62 | 370.23  | S         |         |        |   |
|   |        |         | Propionyl | 728.40  | 364.71 | 7 |
| 3 | 236.14 | 471.28  | T         |         |        |   |
|   |        |         | G         | 627.36  | 314.18 | 6 |
| 4 | 264.66 | 528.30  | G         |         |        |   |
|   |        |         | G         | 570.34  | 285.67 | 5 |
| 5 | 293.17 | 585.32  | K         |         |        |   |
|   |        |         | Acetyl    | 513.31  | 257.16 | 4 |
| 6 | 378.22 | 755.43  | A         |         |        |   |
|   |        |         | K         | 343.21  | 172.11 | 3 |
| 7 | 413.74 | 826.47  | A         |         |        |   |
|   |        |         | P         | 272.17  | 136.59 | 2 |
| 8 | 462.26 | 923.52  | P         |         |        |   |
|   |        |         | R         | 175.12  | 88.06  | 1 |
| 9 | 540.31 | 1079.62 |           |         |        |   |

**Experimental spectrum**

scan 5092  
 retention time 33.9min  
 precursor m/z 580.8243  
 precursor charge 2+

**Theoretical**

M H<sup>2+</sup> 580.8248  
 MH Δ<sub>mass</sub> Da -0.0010  
 MH Δ<sub>mass</sub> ppm -0.8

**edit peptide**

{PIC}K{Trimethyl}S{Propionyl}TGGK{Acetyl}APR align

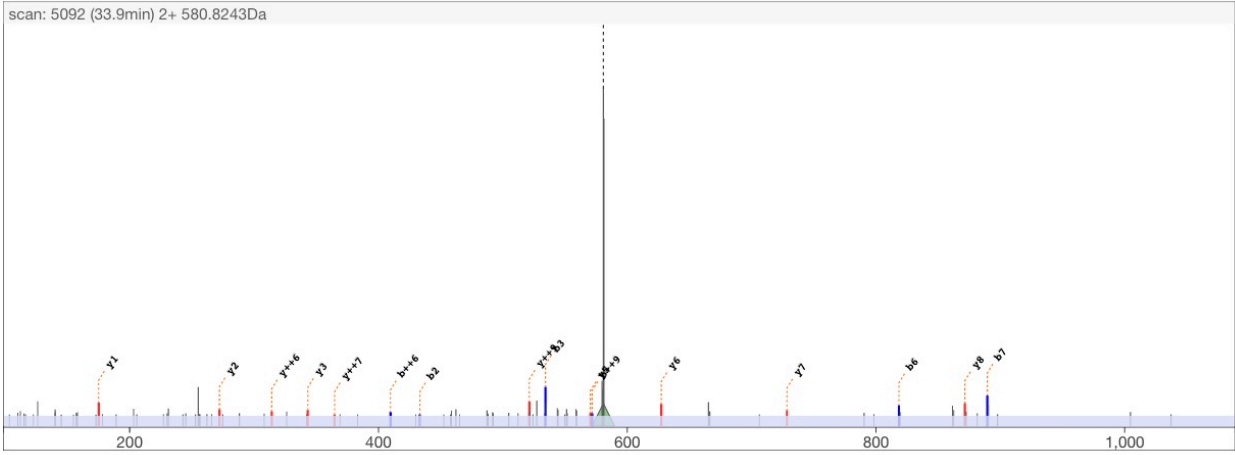

|   | b++    | b       |             | y       | y++    |   |
|---|--------|---------|-------------|---------|--------|---|
|   | 60.53  | 120.04  | PIC         | 1041.61 | 521.31 | 9 |
| 1 | 145.60 | 290.19  | K           | 871.46  | 436.24 | 8 |
| 2 | 217.13 | 433.24  | Trimethyl S | 728.40  | 364.71 | 7 |
| 3 | 267.65 | 534.29  | Propionyl T | 627.36  | 314.18 | 6 |
| 4 | 296.16 | 591.31  | G           | 570.34  | 285.67 | 5 |
| 5 | 324.67 | 648.34  | G           | 513.31  | 257.16 | 4 |
| 6 | 409.72 | 818.44  | K           | 343.21  | 172.11 | 3 |
| 7 | 445.24 | 889.48  | Acetyl A    | 272.17  | 136.59 | 2 |
| 8 | 493.77 | 986.53  | P           | 175.12  | 88.06  | 1 |
| 9 | 571.82 | 1142.63 | R           |         |        |   |

# H3\_K9-R17:

## KAcSTGGKAcAPR

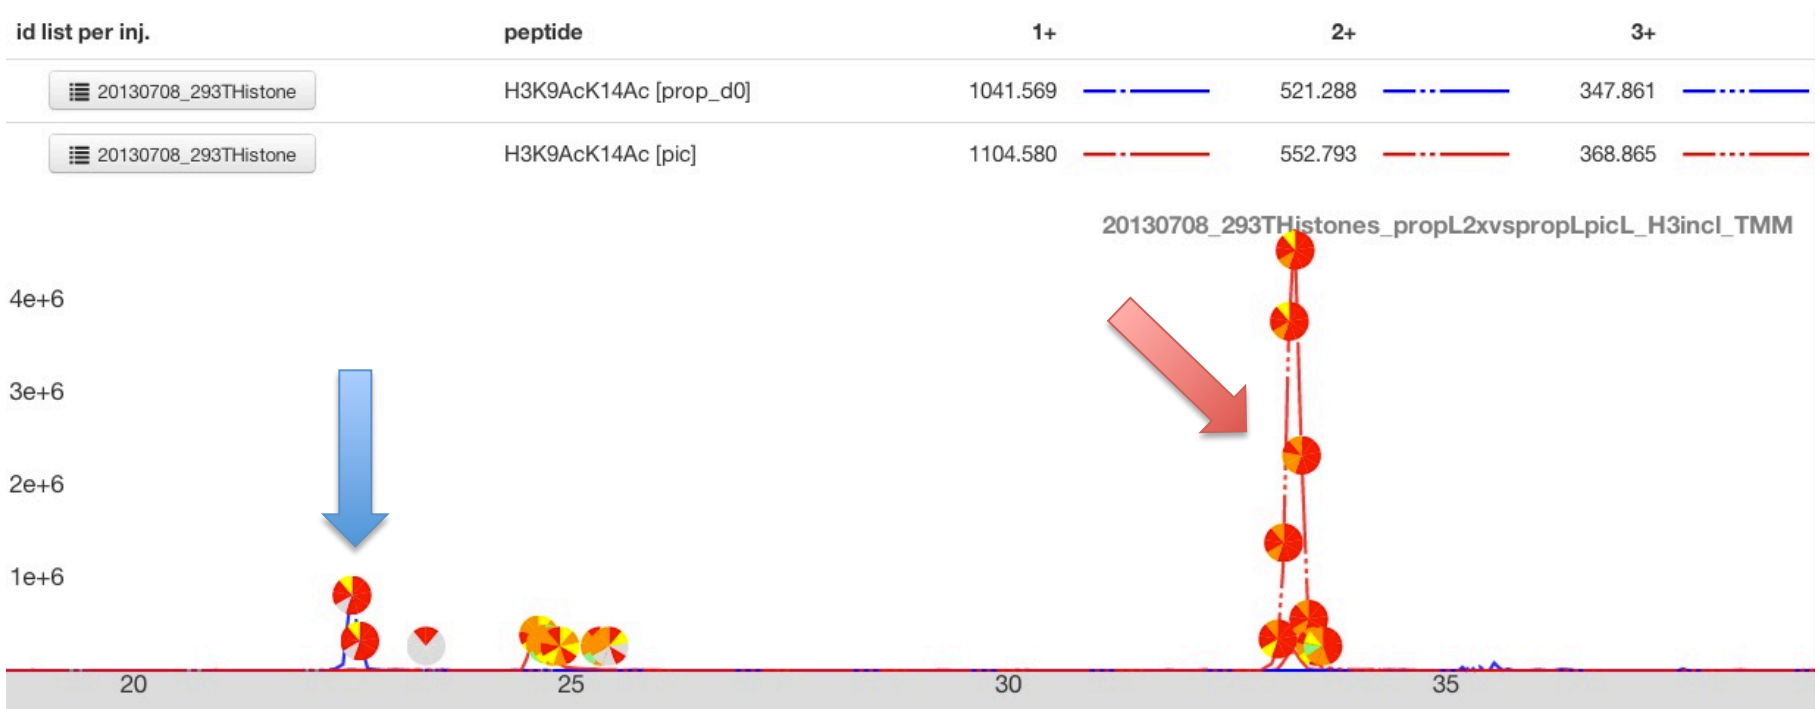

Quanti event: 22.1-23.0min

| injection                                           | peptide               | charge | m/z       | auc    |
|-----------------------------------------------------|-----------------------|--------|-----------|--------|
| 20130708_293THistones_propL2xvspropLpicL_H3incl_TMM | H3K9AcK14Ac [prop_d0] | 1      | 1041.5687 | 5.5e+4 |
| 20130708_293THistones_propL2xvspropLpicL_H3incl_TMM | H3K9AcK14Ac [pic]     | 1      | 1104.5796 | 0.0e+0 |
| 20130708_293THistones_propL2xvspropLpicL_H3incl_TMM | H3K9AcK14Ac [prop_d0] | 2      | 521.2880  | 7.3e+6 |
| 20130708_293THistones_propL2xvspropLpicL_H3incl_TMM | H3K9AcK14Ac [pic]     | 2      | 552.7935  | 6.4e+3 |
| 20130708_293THistones_propL2xvspropLpicL_H3incl_TMM | H3K9AcK14Ac [prop_d0] | 3      | 347.8611  | 0.0e+0 |
| 20130708_293THistones_propL2xvspropLpicL_H3incl_TMM | H3K9AcK14Ac [pic]     | 3      | 368.8647  | 0.0e+0 |

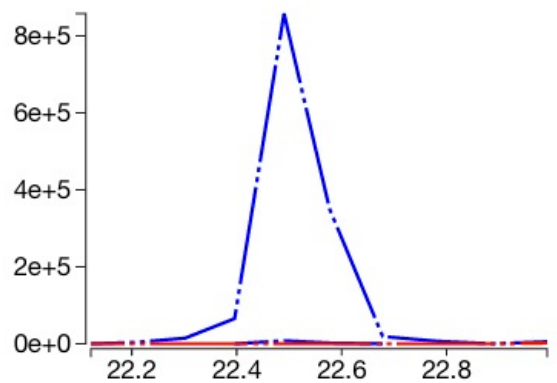

Quanti event: 32.6-33.9min

| injection                                           | peptide               | charge | m/z       | auc    |
|-----------------------------------------------------|-----------------------|--------|-----------|--------|
| 20130708_293THistones_propL2xvspropLpicL_H3incl_TMM | H3K9AcK14Ac [prop_d0] | 1      | 1041.5687 | 0.0e+0 |
| 20130708_293THistones_propL2xvspropLpicL_H3incl_TMM | H3K9AcK14Ac [pic]     | 1      | 1104.5796 | 2.6e+6 |
| 20130708_293THistones_propL2xvspropLpicL_H3incl_TMM | H3K9AcK14Ac [prop_d0] | 2      | 521.2880  | 4.4e+4 |
| 20130708_293THistones_propL2xvspropLpicL_H3incl_TMM | H3K9AcK14Ac [pic]     | 2      | 552.7935  | 5.5e+7 |
| 20130708_293THistones_propL2xvspropLpicL_H3incl_TMM | H3K9AcK14Ac [prop_d0] | 3      | 347.8611  | 0.0e+0 |
| 20130708_293THistones_propL2xvspropLpicL_H3incl_TMM | H3K9AcK14Ac [pic]     | 3      | 368.8647  | 0.0e+0 |

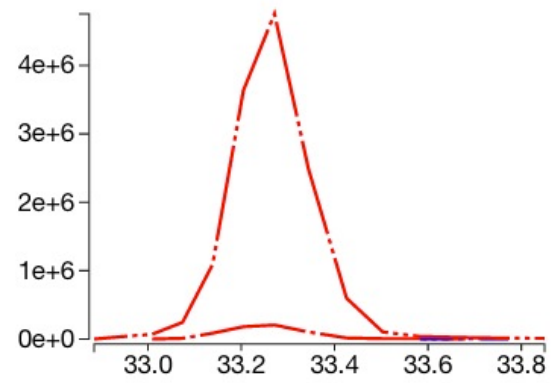

**Experimental spectrum**

scan 2875  
 retention time 22.6min  
 precursor m/z 521.2877  
 precursor charge 2+

**Theoretical**

M H<sup>2+</sup> 521.2880  
 MH Δ<sub>mass</sub> Da -0.0006  
 MH Δ<sub>mass</sub> ppm -0.5

**edit peptide**

{Propionyl}K{Acetyl}STGGK{Acetyl}APR align

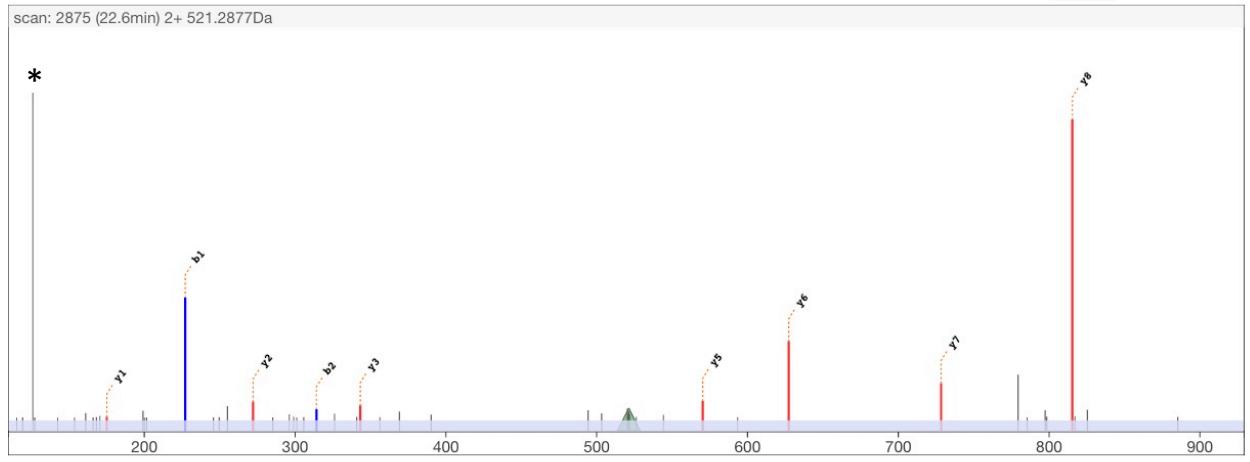

|   | b++    | b       |           | y      | y++    |   |
|---|--------|---------|-----------|--------|--------|---|
|   |        |         | Propionyl | 985.54 | 493.27 | 9 |
| 1 | 114.07 | 227.14  | K         | 815.44 | 408.22 | 8 |
| 2 | 157.59 | 314.17  | Acetyl    | 728.40 | 364.71 | 7 |
| 3 | 208.11 | 415.22  | S         | 627.36 | 314.18 | 6 |
| 4 | 236.62 | 472.24  | T         | 570.34 | 285.67 | 5 |
| 5 | 265.13 | 529.26  | G         | 513.31 | 257.16 | 4 |
| 6 | 350.19 | 699.37  | Acetyl    | 343.21 | 172.11 | 3 |
| 7 | 385.71 | 770.40  | K         | 272.17 | 136.59 | 2 |
| 8 | 434.23 | 867.46  | A         | 175.12 | 88.06  | 1 |
| 9 | 512.28 | 1023.56 | P         |        |        |   |
|   |        |         | R         |        |        |   |

\* = 126Da diagnostic ion

**Experimental spectrum**

scan 4995  
 retention time 33.4min  
 precursor m/z 552.7928  
 precursor charge 2+

**Theoretical**

M H<sup>2+</sup> 552.7935  
 MH Δ<sub>mass</sub> Da -0.0013  
 MH Δ<sub>mass</sub> ppm -1.2

**edit peptide**

{PIC}K(Acetyl)STGGK(Acetyl)APR align

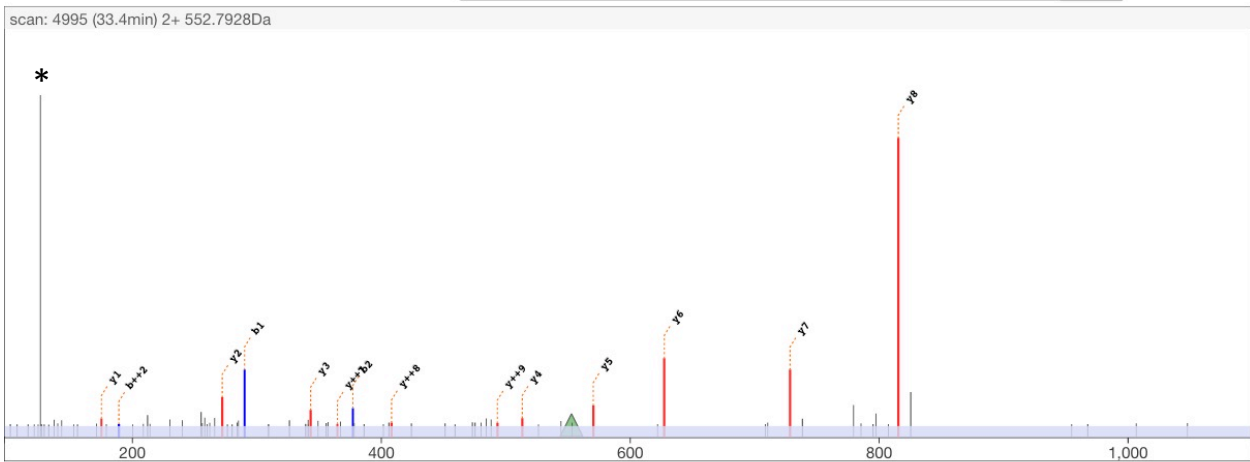

|   | b++    | b       |        | y      | y++    |   |
|---|--------|---------|--------|--------|--------|---|
|   | 60.53  | 120.04  | PIC    | 985.54 | 493.27 | 9 |
| 1 | 145.58 | 290.15  | K      | 815.44 | 408.22 | 8 |
| 2 | 189.09 | 377.18  | Acetyl | 728.40 | 364.71 | 7 |
| 3 | 239.62 | 478.23  | S      | 627.36 | 314.18 | 6 |
| 4 | 268.13 | 535.25  | T      | 570.34 | 285.67 | 5 |
| 5 | 296.64 | 592.27  | G      | 513.31 | 257.16 | 4 |
| 6 | 381.69 | 762.38  | G      | 343.21 | 172.11 | 3 |
| 7 | 417.21 | 833.42  | Acetyl | 272.17 | 136.59 | 2 |
| 8 | 465.74 | 930.47  | K      | 175.12 | 88.06  | 1 |
| 9 | 543.79 | 1086.57 | A      |        |        |   |
|   |        |         | P      |        |        |   |
|   |        |         | R      |        |        |   |

\* = 126Da diagnostic ion
