# Supplementary material
Source: PubMed Central journal article supplement (PMC4390259)
Supplement: supp_O114.046573_mcp.O114.046573-4.pdf [file supp_O114.046573_mcp.O114.046573-4.pdf]

**H3\_K18-R26**

**KQLATKAAR**

# H3\_K18-R26: KQLATKAAR

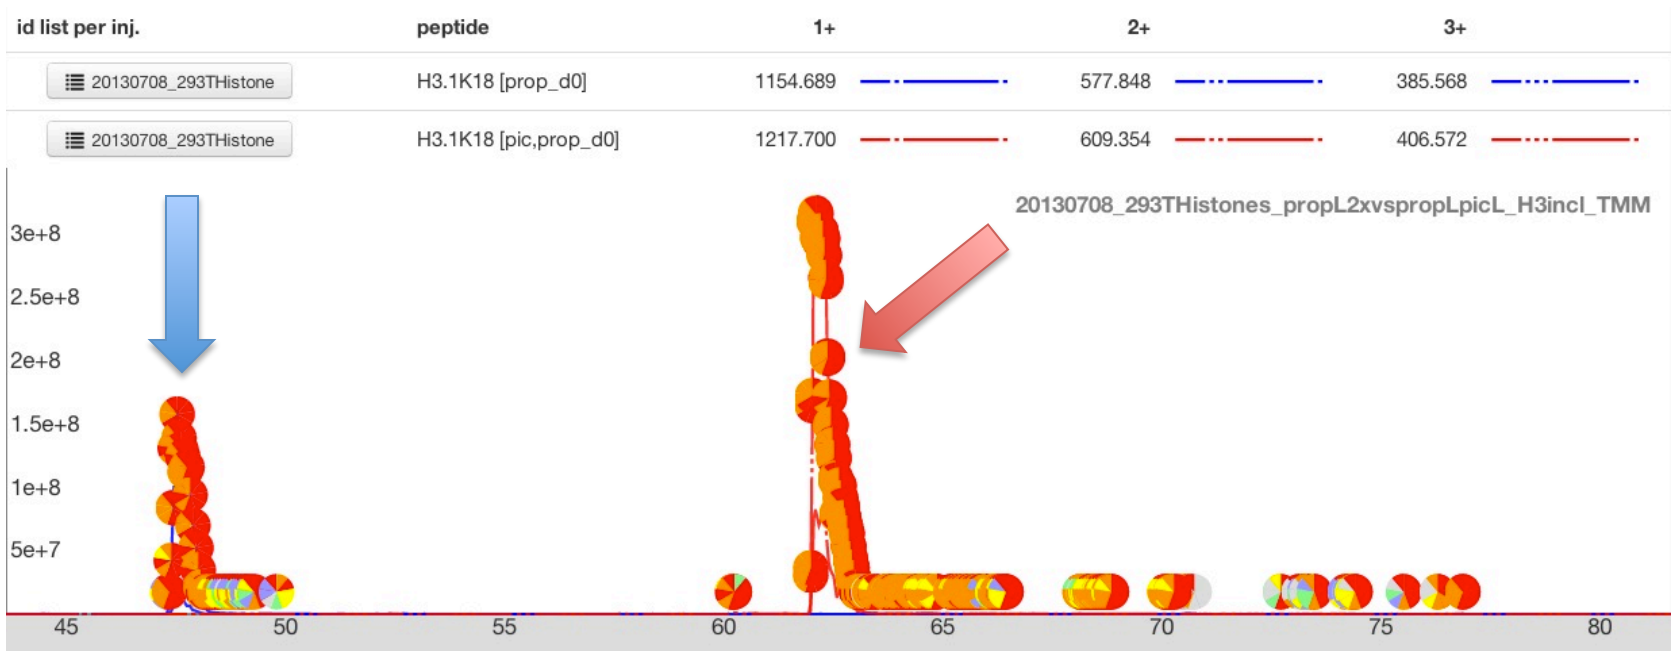

## Quanti event: 47.1-49.4min

| injection                                           | peptide               | charge | m/z       | auc    |
|-----------------------------------------------------|-----------------------|--------|-----------|--------|
| 20130708_293THistones_propL2xvspropLpicL_H3incl_TMM | H3.1K18 [prop_d0]     | 1      | 1154.6892 | 2.8e+8 |
| 20130708_293THistones_propL2xvspropLpicL_H3incl_TMM | H3.1K18 [pic,prop_d0] | 1      | 1217.7001 | 0.0e+0 |
| 20130708_293THistones_propL2xvspropLpicL_H3incl_TMM | H3.1K18 [prop_d0]     | 2      | 577.8482  | 4.0e+9 |
| 20130708_293THistones_propL2xvspropLpicL_H3incl_TMM | H3.1K18 [pic,prop_d0] | 2      | 609.3537  | 6.6e+5 |
| 20130708_293THistones_propL2xvspropLpicL_H3incl_TMM | H3.1K18 [prop_d0]     | 3      | 385.5679  | 0.0e+0 |
| 20130708_293THistones_propL2xvspropLpicL_H3incl_TMM | H3.1K18 [pic,prop_d0] | 3      | 406.5715  | 0.0e+0 |

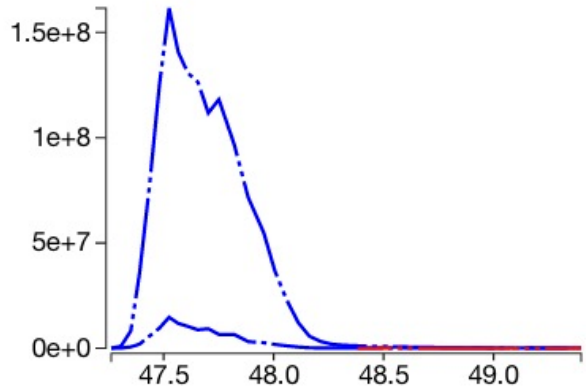

## Quanti event: 61.0-67.2min

| injection                                           | peptide               | charge | m/z       | auc    |
|-----------------------------------------------------|-----------------------|--------|-----------|--------|
| 20130708_293THistones_propL2xvspropLpicL_H3incl_TMM | H3.1K18 [prop_d0]     | 1      | 1154.6892 | 0.0e+0 |
| 20130708_293THistones_propL2xvspropLpicL_H3incl_TMM | H3.1K18 [pic,prop_d0] | 1      | 1217.7001 | 2.3e+9 |
| 20130708_293THistones_propL2xvspropLpicL_H3incl_TMM | H3.1K18 [prop_d0]     | 2      | 577.8482  | 2.1e+5 |
| 20130708_293THistones_propL2xvspropLpicL_H3incl_TMM | H3.1K18 [pic,prop_d0] | 2      | 609.3537  | 9.7e+9 |
| 20130708_293THistones_propL2xvspropLpicL_H3incl_TMM | H3.1K18 [prop_d0]     | 3      | 385.5679  | 0.0e+0 |
| 20130708_293THistones_propL2xvspropLpicL_H3incl_TMM | H3.1K18 [pic,prop_d0] | 3      | 406.5715  | 0.0e+0 |

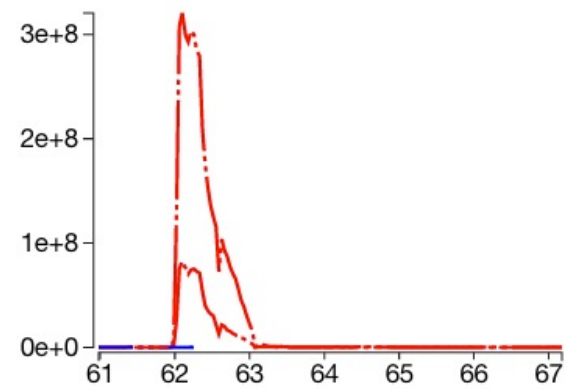

**Experimental spectrum**

scan 8946  
 retention time 47.5min  
 precursor m/z 577.8473  
 precursor charge 2+

**Theoretical**

M H<sup>2+</sup> 577.8482  
 MH Δ<sub>mass</sub> Da -0.0019  
 MH Δ<sub>mass</sub> ppm -1.6

**edit peptide**

{Propionyl}K{Propionyl}QLATK{Propionyl}AAR align

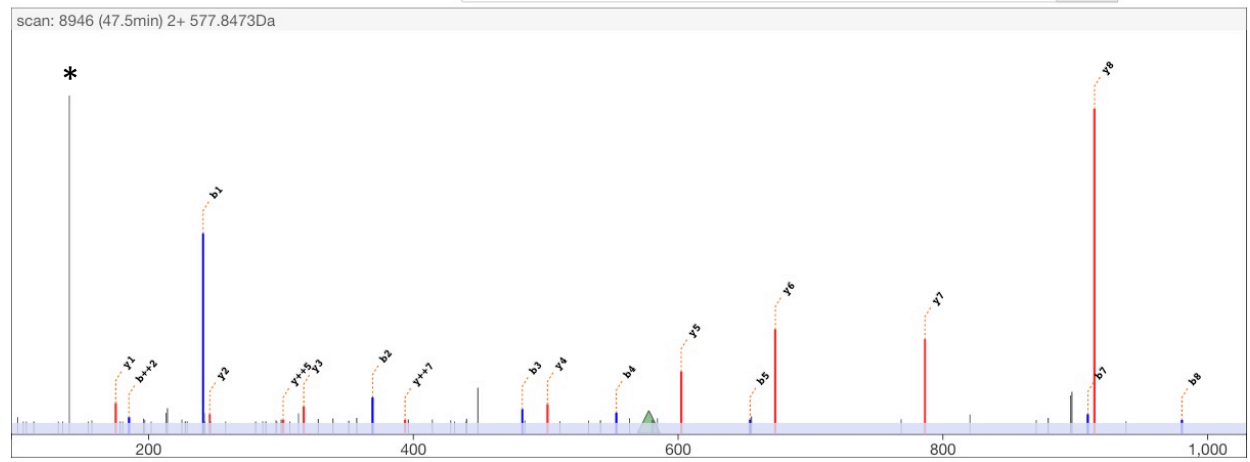

|   | b++    | b       |           | y       | y++    |   |
|---|--------|---------|-----------|---------|--------|---|
|   |        |         | Propionyl | 1098.66 | 549.84 | 9 |
| 1 | 121.08 | 241.15  | K         |         |        |   |
|   |        |         | Propionyl | 914.54  | 457.77 | 8 |
| 2 | 185.11 | 369.21  | Q         |         |        |   |
|   |        |         | L         | 786.48  | 393.75 | 7 |
| 3 | 241.65 | 482.30  | A         |         |        |   |
|   |        |         | T         | 673.40  | 337.20 | 6 |
| 4 | 277.17 | 553.33  | A         |         |        |   |
|   |        |         | T         | 602.36  | 301.68 | 5 |
| 5 | 327.69 | 654.38  | K         |         |        |   |
|   |        |         | Propionyl | 501.31  | 251.16 | 4 |
| 6 | 419.76 | 838.50  | A         |         |        |   |
|   |        |         | Propionyl | 317.19  | 159.10 | 3 |
| 7 | 455.27 | 909.54  | A         |         |        |   |
|   |        |         | A         | 246.16  | 123.58 | 2 |
| 8 | 490.79 | 980.58  | R         |         |        |   |
|   |        |         | R         | 175.12  | 88.06  | 1 |
| 9 | 568.84 | 1136.68 |           |         |        |   |

\* = 140Da diagnostic ion

# H3\_K18-R26: PIC-KQLATKAAR MS/MS

### Experimental spectrum

scan 13619  
 retention time 62.1min  
 precursor m/z 609.3524  
 precursor charge 2+

### Theoretical

M H<sup>2+</sup> 609.3537  
 MH  $\Delta$ <sub>mass</sub> Da -0.0026  
 MH  $\Delta$ <sub>mass</sub> ppm -2.2

### edit peptide

{PIC}K{Propionyl}QLATK{Propionyl}AAR align

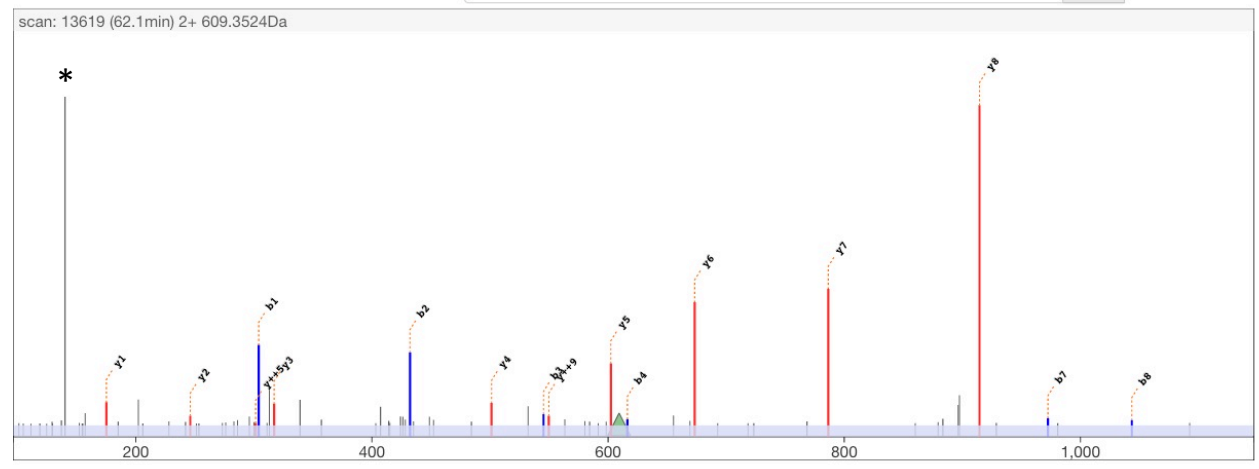

|   | b++    | b       |                | y       | y++    |   |
|---|--------|---------|----------------|---------|--------|---|
|   | 60.53  | 120.04  | PIC            | 1098.66 | 549.84 | 9 |
| 1 | 152.59 | 304.17  | K<br>Propionyl | 914.54  | 457.77 | 8 |
| 2 | 216.62 | 432.22  | Q              | 786.48  | 393.75 | 7 |
| 3 | 273.16 | 545.31  | L              | 673.40  | 337.20 | 6 |
| 4 | 308.68 | 616.35  | A              | 602.36  | 301.68 | 5 |
| 5 | 359.20 | 717.39  | T              | 501.31  | 251.16 | 4 |
| 6 | 451.26 | 901.51  | K<br>Propionyl | 317.19  | 159.10 | 3 |
| 7 | 486.78 | 972.55  | A              | 246.16  | 123.58 | 2 |
| 8 | 522.30 | 1043.59 | A              | 175.12  | 88.06  | 1 |
| 9 | 600.35 | 1199.69 | R              |         |        |   |

\* = 140Da diagnostic ion

# H3\_K18-R26:

## KQLATPropKAAR

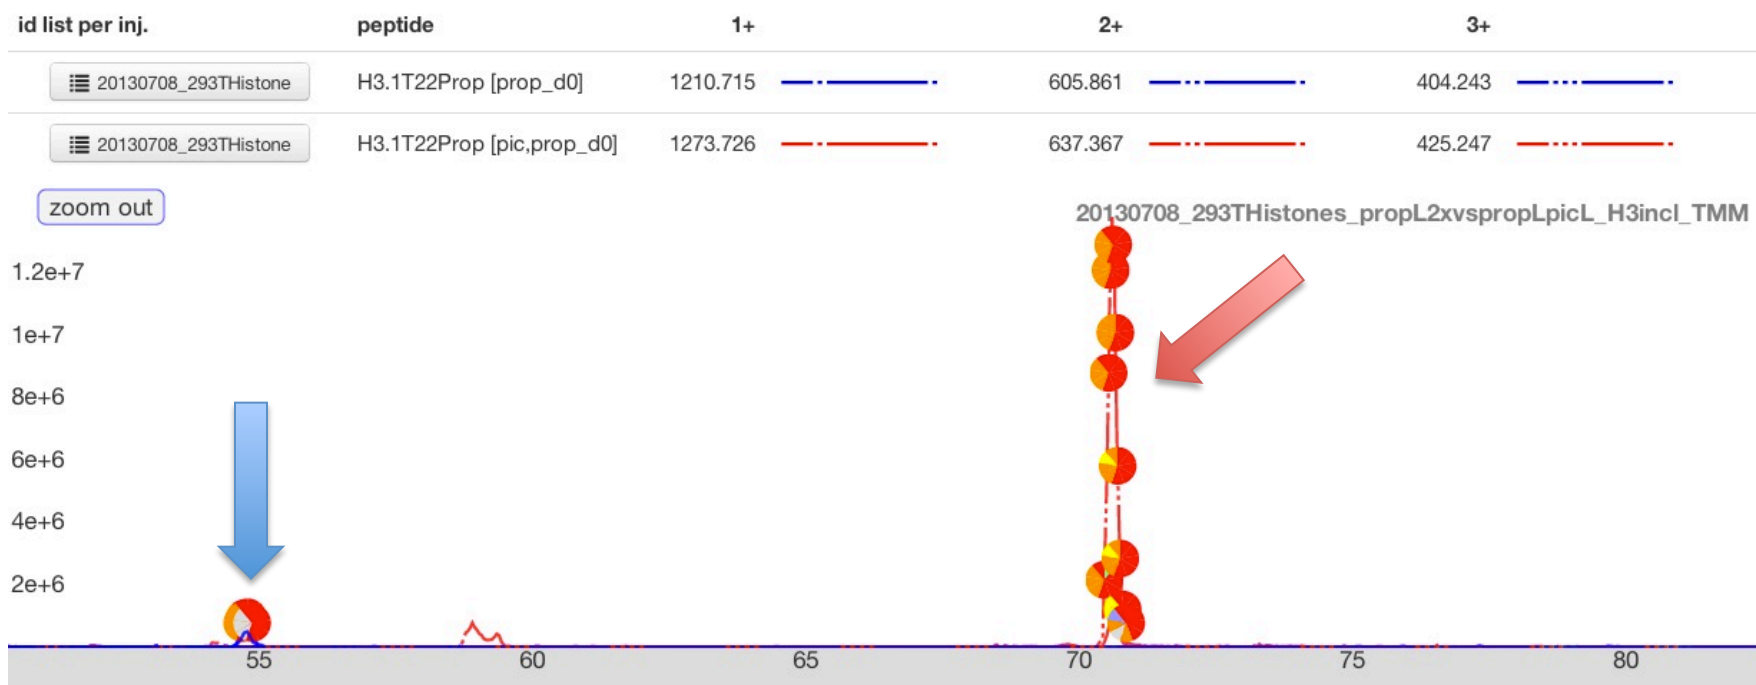

## Quanti event: 54.5-55.3min

| injection                                           | peptide                   | charge | m/z       | auc    |
|-----------------------------------------------------|---------------------------|--------|-----------|--------|
| 20130708_293THistones_propL2xvspropLpicL_H3incl_TMM | H3.1T22Prop [prop_d0]     | 1      | 1210.7154 | 6.3e+6 |
| 20130708_293THistones_propL2xvspropLpicL_H3incl_TMM | H3.1T22Prop [pic,prop_d0] | 1      | 1273.7263 | 0.0e+0 |
| 20130708_293THistones_propL2xvspropLpicL_H3incl_TMM | H3.1T22Prop [prop_d0]     | 2      | 605.8613  | 1.3e+7 |
| 20130708_293THistones_propL2xvspropLpicL_H3incl_TMM | H3.1T22Prop [pic,prop_d0] | 2      | 637.3668  | 0.0e+0 |
| 20130708_293THistones_propL2xvspropLpicL_H3incl_TMM | H3.1T22Prop [prop_d0]     | 3      | 404.2433  | 0.0e+0 |
| 20130708_293THistones_propL2xvspropLpicL_H3incl_TMM | H3.1T22Prop [pic,prop_d0] | 3      | 425.2470  | 0.0e+0 |

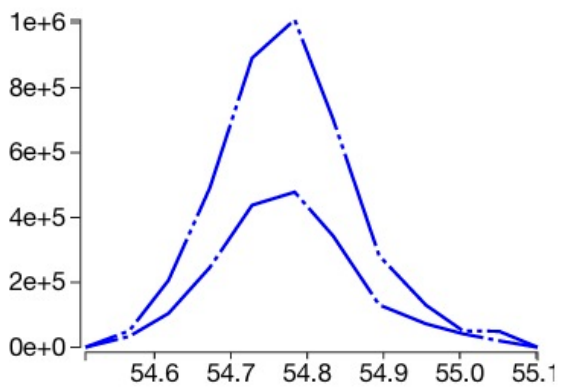

## Quanti event: 70.3-71.0min

| injection                                           | peptide                   | charge | m/z       | auc    |
|-----------------------------------------------------|---------------------------|--------|-----------|--------|
| 20130708_293THistones_propL2xvspropLpicL_H3incl_TMM | H3.1T22Prop [prop_d0]     | 1      | 1210.7154 | 0.0e+0 |
| 20130708_293THistones_propL2xvspropLpicL_H3incl_TMM | H3.1T22Prop [pic,prop_d0] | 1      | 1273.7263 | 1.3e+7 |
| 20130708_293THistones_propL2xvspropLpicL_H3incl_TMM | H3.1T22Prop [prop_d0]     | 2      | 605.8613  | 0.0e+0 |
| 20130708_293THistones_propL2xvspropLpicL_H3incl_TMM | H3.1T22Prop [pic,prop_d0] | 2      | 637.3668  | 1.5e+8 |
| 20130708_293THistones_propL2xvspropLpicL_H3incl_TMM | H3.1T22Prop [prop_d0]     | 3      | 404.2433  | 0.0e+0 |
| 20130708_293THistones_propL2xvspropLpicL_H3incl_TMM | H3.1T22Prop [pic,prop_d0] | 3      | 425.2470  | 0.0e+0 |

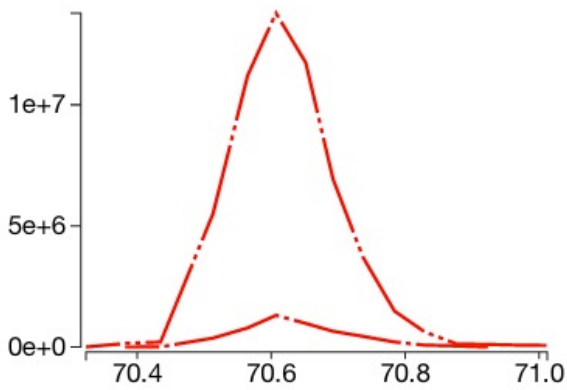

### Experimental spectrum

scan 11203  
 retention time 54.7min  
 precursor m/z 605.8610  
 precursor charge 2+

### Theoretical

M H<sup>2+</sup> 605.8613  
 MH Δ<sub>mass</sub> Da -0.0008  
 MH Δ<sub>mass</sub> ppm -0.6

### edit peptide

{Propionyl}K{Propionyl}QLAT{Propionyl}K{Propionyl}AAR align

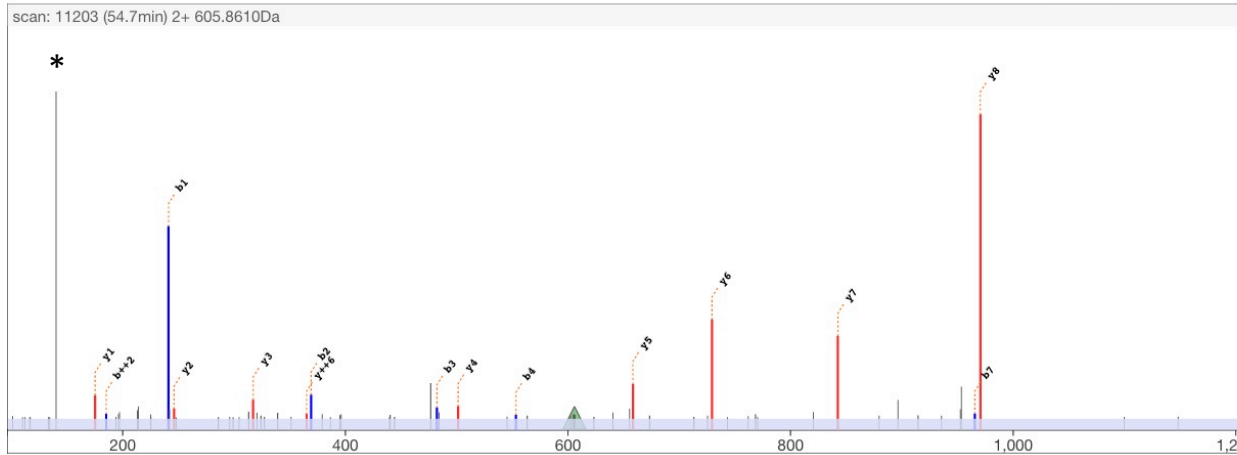

|   | b++    | b       |           | y       | y++    |   |
|---|--------|---------|-----------|---------|--------|---|
|   |        |         | Propionyl | 1154.69 | 577.85 | 9 |
| 1 | 121.08 | 241.15  | K         |         |        |   |
|   |        |         | Propionyl | 970.57  | 485.79 | 8 |
| 2 | 185.11 | 369.21  | Q         |         |        |   |
|   |        |         | L         | 842.51  | 421.76 | 7 |
| 3 | 241.65 | 482.30  | A         | 729.43  | 365.22 | 6 |
|   |        |         | T         | 658.39  | 329.70 | 5 |
| 4 | 277.17 | 553.33  | Propionyl |         |        |   |
| 5 | 355.71 | 710.41  | K         | 501.31  | 251.16 | 4 |
|   |        |         | Propionyl |         |        |   |
| 6 | 447.77 | 894.53  | A         | 317.19  | 159.10 | 3 |
|   |        |         | A         | 246.16  | 123.58 | 2 |
| 7 | 483.29 | 965.57  | R         | 175.12  | 88.06  | 1 |
| 8 | 518.81 | 1036.60 |           |         |        |   |
| 9 | 596.86 | 1192.70 |           |         |        |   |

\* = 140Da diagnostic ion



### Experimental spectrum

scan 16407  
 retention time 70.5min  
 precursor m/z 637.3665  
 precursor charge 2+

### Theoretical

M H<sup>2+</sup> 637.3668  
 MH Δ<sub>mass</sub> Da -0.0005  
 MH Δ<sub>mass</sub> ppm -0.4

### edit peptide

{PIC}K{Propionyl}QLAT{Propionyl}K{Propionyl}AAR

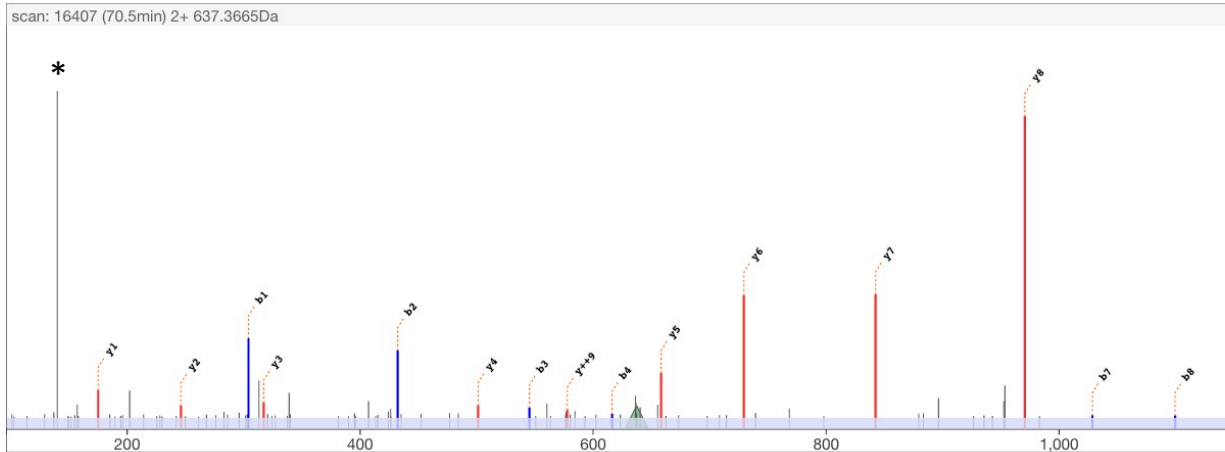

|   | b++    | b       |           | y       | y++    |   |
|---|--------|---------|-----------|---------|--------|---|
|   | 60.53  | 120.04  | PIC       | 1154.69 | 577.85 | 9 |
| 1 | 152.59 | 304.17  | K         | 970.57  | 485.79 | 8 |
|   |        |         | Propionyl |         |        |   |
| 2 | 216.62 | 432.22  | Q         | 842.51  | 421.76 | 7 |
| 3 | 273.16 | 545.31  | L         | 729.43  | 365.22 | 6 |
| 4 | 308.68 | 616.35  | A         | 658.39  | 329.70 | 5 |
| 5 | 387.21 | 773.42  | T         | 501.31  | 251.16 | 4 |
|   |        |         | Propionyl |         |        |   |
| 6 | 479.27 | 957.54  | K         | 317.19  | 159.10 | 3 |
|   |        |         | Propionyl |         |        |   |
| 7 | 514.79 | 1028.58 | A         | 246.16  | 123.58 | 2 |
| 8 | 550.31 | 1099.61 | A         | 175.12  | 88.06  | 1 |
| 9 | 628.36 | 1255.72 | R         |         |        |   |

\* = 140Da diagnostic ion

# H3\_K18-R26: KMe1QLATKAAR

PIC-labeled peptides run as double-peak, Prop-labeled peptides. Earlier eluting peak is K23Me1, propionylated K23Me1 MS2s not detected (see page #xx).

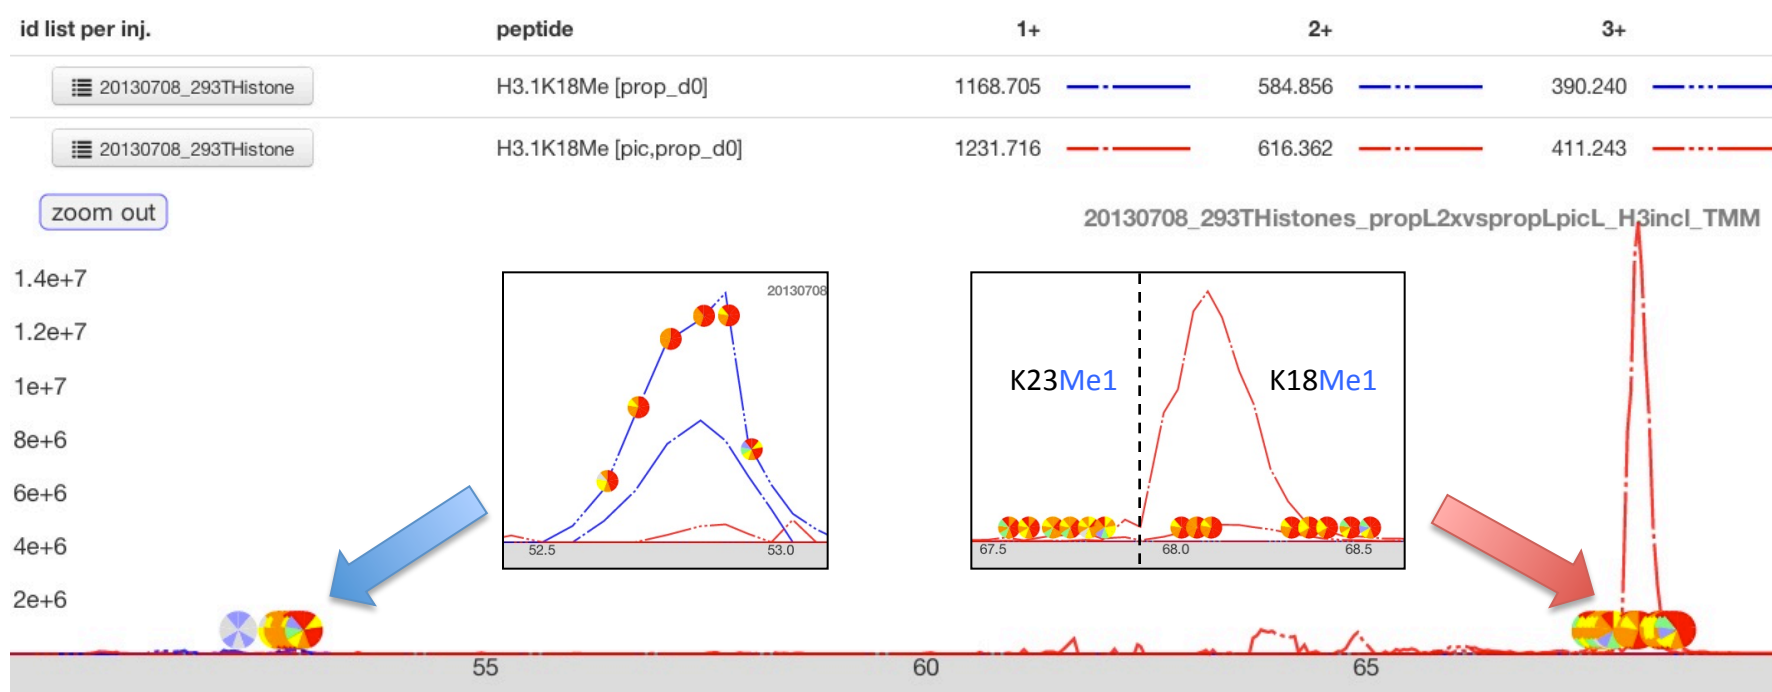

## Quanti event: 52.5-53.1min

| injection                                           | peptide                 | charge | m/z       | auc    |
|-----------------------------------------------------|-------------------------|--------|-----------|--------|
| 20130708_293THistones_propL2xvspropLpicL_H3incl_TMM | H3.1K18Me [prop_d0]     | 1      | 1168.7048 | 2.0e+6 |
| 20130708_293THistones_propL2xvspropLpicL_H3incl_TMM | H3.1K18Me [pic,prop_d0] | 1      | 1231.7157 | 0.0e+0 |
| 20130708_293THistones_propL2xvspropLpicL_H3incl_TMM | H3.1K18Me [prop_d0]     | 2      | 584.8561  | 4.2e+6 |
| 20130708_293THistones_propL2xvspropLpicL_H3incl_TMM | H3.1K18Me [pic,prop_d0] | 2      | 616.3615  | 7.2e+4 |
| 20130708_293THistones_propL2xvspropLpicL_H3incl_TMM | H3.1K18Me [prop_d0]     | 3      | 390.2398  | 0.0e+0 |
| 20130708_293THistones_propL2xvspropLpicL_H3incl_TMM | H3.1K18Me [pic,prop_d0] | 3      | 411.2434  | 1.9e+5 |

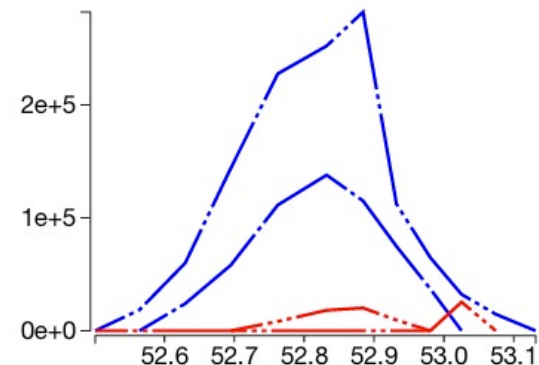

## Quanti event: 67.9-68.6min

| injection                                           | peptide                 | charge | m/z       | auc    |
|-----------------------------------------------------|-------------------------|--------|-----------|--------|
| 20130708_293THistones_propL2xvspropLpicL_H3incl_TMM | H3.1K18Me [prop_d0]     | 1      | 1168.7048 | 0.0e+0 |
| 20130708_293THistones_propL2xvspropLpicL_H3incl_TMM | H3.1K18Me [pic,prop_d0] | 1      | 1231.7157 | 2.4e+8 |
| 20130708_293THistones_propL2xvspropLpicL_H3incl_TMM | H3.1K18Me [prop_d0]     | 2      | 584.8561  | 0.0e+0 |
| 20130708_293THistones_propL2xvspropLpicL_H3incl_TMM | H3.1K18Me [pic,prop_d0] | 2      | 616.3615  | 2.0e+7 |
| 20130708_293THistones_propL2xvspropLpicL_H3incl_TMM | H3.1K18Me [prop_d0]     | 3      | 390.2398  | 0.0e+0 |
| 20130708_293THistones_propL2xvspropLpicL_H3incl_TMM | H3.1K18Me [pic,prop_d0] | 3      | 411.2434  | 0.0e+0 |

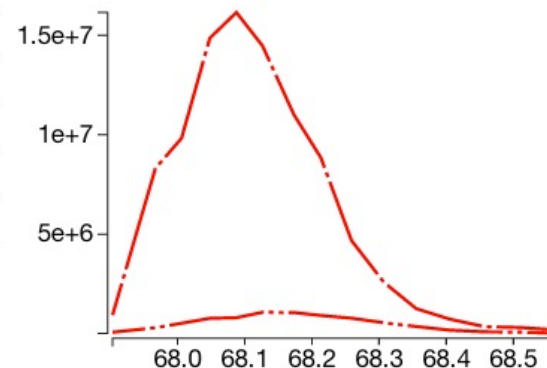

**Experimental spectrum**

scan 10610  
 retention time 52.8min  
 precursor m/z 584.8555  
 precursor charge 2+

**Theoretical**

M H<sup>2+</sup> 584.8561  
 MH Δ<sub>mass</sub> Da -0.0012  
 MH Δ<sub>mass</sub> ppm -1.0

**edit peptide**

{Propionyl}K{Methyl,Propionyl}QLATK{Propionyl}AAR align

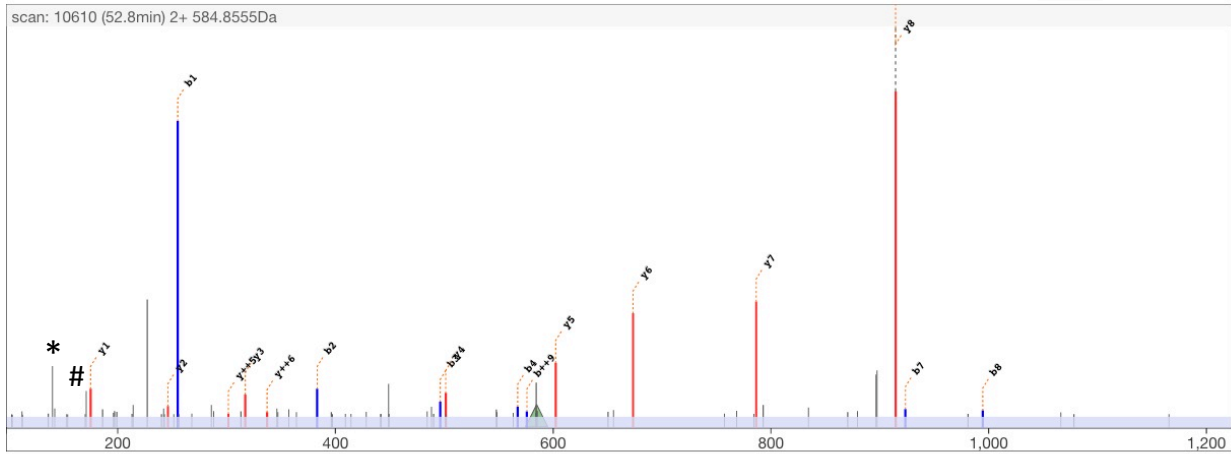

|   | b++    | b       |                  | y       | y++    |   |
|---|--------|---------|------------------|---------|--------|---|
|   |        |         | Propionyl        | 1112.68 | 556.84 | 9 |
| 1 | 128.09 | 255.17  | Methyl,Propionyl | 914.54  | 457.77 | 8 |
| 2 | 192.12 | 383.23  | K                | 786.48  | 393.75 | 7 |
| 3 | 248.66 | 496.31  | Q                | 673.40  | 337.20 | 6 |
| 4 | 284.18 | 567.35  | L                | 602.36  | 301.68 | 5 |
| 5 | 334.70 | 668.40  | A                | 501.31  | 251.16 | 4 |
| 6 | 426.76 | 852.52  | T                | 317.19  | 159.10 | 3 |
| 7 | 462.28 | 923.56  | K                | 246.16  | 123.58 | 2 |
| 8 | 497.80 | 994.59  | Propionyl        | 175.12  | 88.06  | 1 |
| 9 | 575.85 | 1150.69 | A                |         |        |   |
|   |        |         | R                |         |        |   |

\* = 140Da diagnostic ion  
 # = 171Da diagnostic ion

# H3\_K18-R26: PIC-KMe1QLATKAAR MS/MS

### Experimental spectrum

scan 15682  
 retention time 68.1min  
 precursor m/z 616.3607  
 precursor charge 2+

### Theoretical

M H<sup>2+</sup> 616.3615  
 MH Δ<sub>mass</sub> Da -0.0017  
 MH Δ<sub>mass</sub> ppm -1.4

### edit peptide

{PIC}K(Methyl,Propionyl)QLATK{Propionyl}AAR align

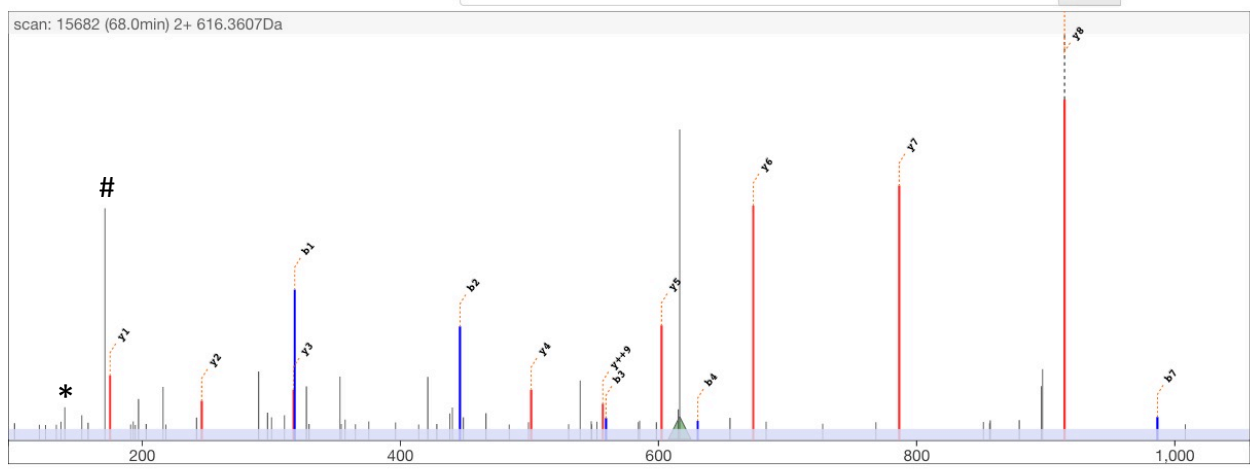

|   | b++    | b       |                  | y       | y++    |   |
|---|--------|---------|------------------|---------|--------|---|
|   | 60.53  | 120.04  | PIC              | 1112.68 | 556.84 | 9 |
| 1 | 159.59 | 318.18  | K                | 914.54  | 457.77 | 8 |
| 2 | 223.62 | 446.24  | Methyl,Propionyl | 786.48  | 393.75 | 7 |
| 3 | 280.17 | 559.32  | Q                | 673.40  | 337.20 | 6 |
| 4 | 315.68 | 630.36  | L                | 602.36  | 301.68 | 5 |
| 5 | 366.21 | 731.41  | A                | 501.31  | 251.16 | 4 |
| 6 | 458.27 | 915.53  | T                | 317.19  | 159.10 | 3 |
| 7 | 493.79 | 986.57  | K                | 246.16  | 123.58 | 2 |
| 8 | 529.31 | 1057.60 | Propionyl        | 175.12  | 88.06  | 1 |
| 9 | 607.36 | 1213.71 | A                |         |        |   |
|   |        |         | R                |         |        |   |

\* = 140Da diagnostic ion  
 # = 171Da diagnostic ion

# H3\_K18-R26: KAcQLATKAAR

Low abundance, peak overlaps with K23Ac. AUC determined on MS2 level.  
Only the first two MS2 from the Prop-Peak could be assigned as K18Ac, Rest is K23Ac!

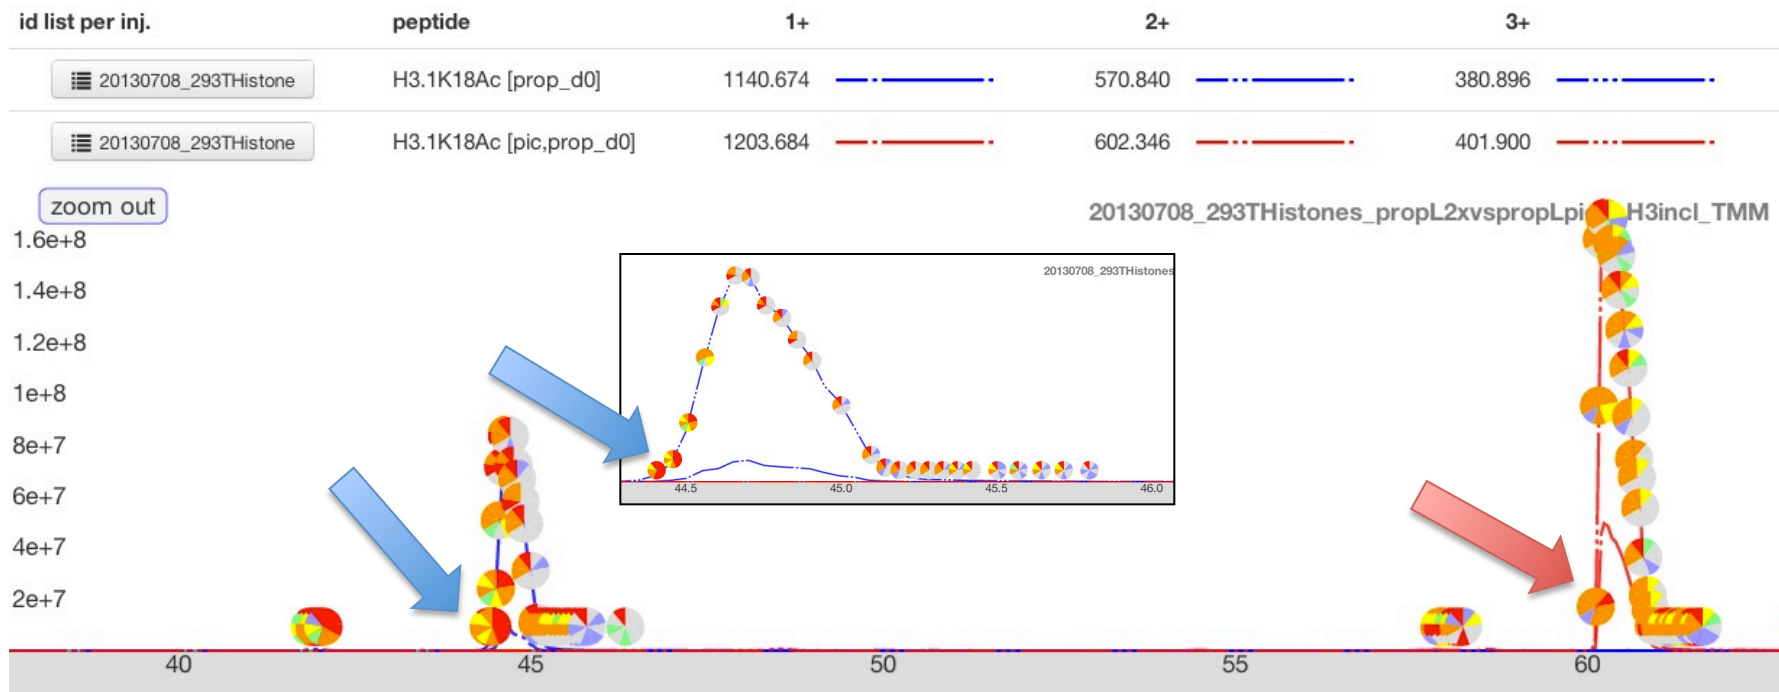

20130708 293THistones\_propL2xvspropLp... 7/8/2013 11:43:33 AM  
6 of 10 ut, Histones  
RT: 36.28 - 68.48

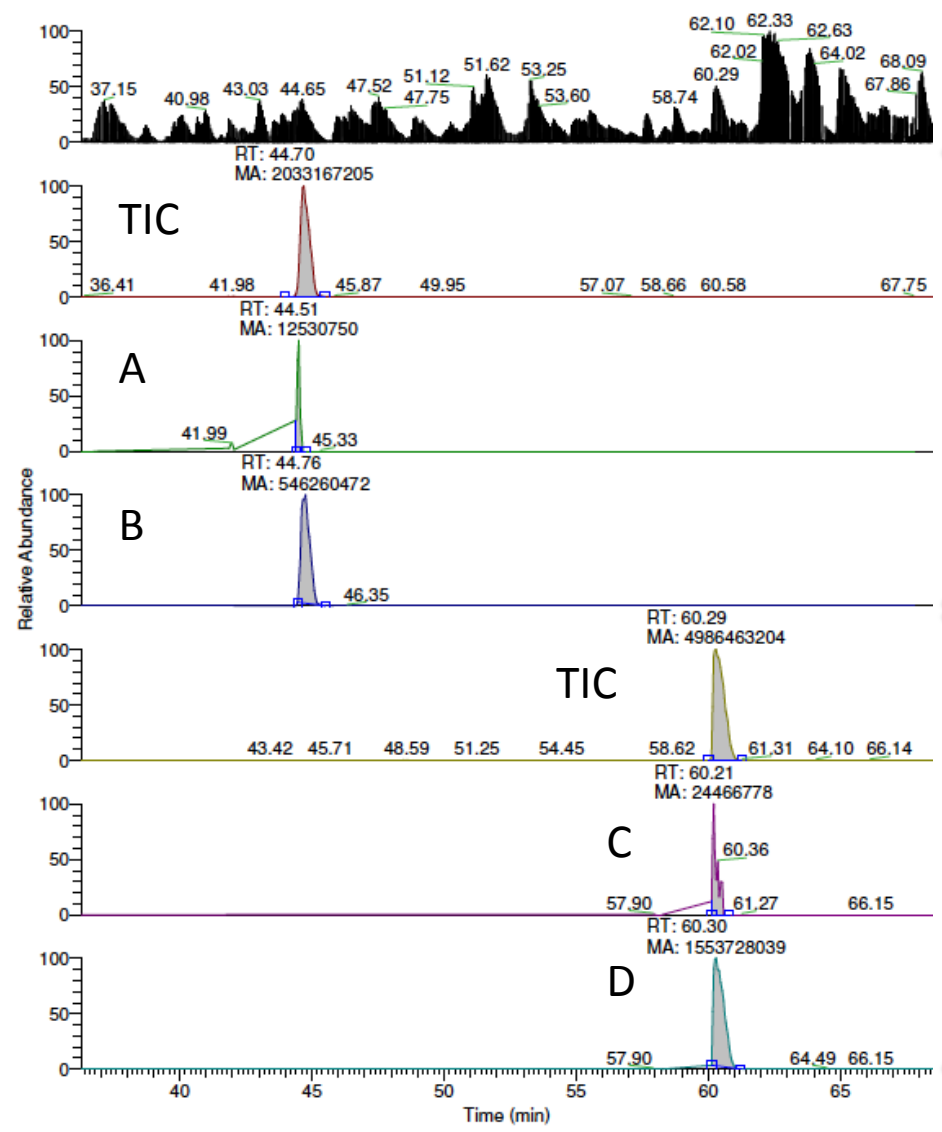

AUC calculation on MS2 level:

XIC-Prop 570.84 (2+)  
227.14, 355.20, 673.40, 786.48, 914.54

XIC-PIC 602.35 (2+)  
290.15, 418.21, 673.40, 786.48, 914.54

A = K18Ac-peak Prop  
B = K23Ac-peak Prop  
C = K18Ac-peak PIC  
D = K23Ac-peak PIC

AUC determined on MS2 level (see page 159).

### Quanti event: 44.1-46.6min

| injection                                           | peptide                 | charge | m/z       | auc    |
|-----------------------------------------------------|-------------------------|--------|-----------|--------|
| 20130708_293THistones_propL2xvspropLpicL_H3incl_TMM | H3.1K23Ac [prop_d0]     | 1      | 1140.6735 | 1.8e+8 |
| 20130708_293THistones_propL2xvspropLpicL_H3incl_TMM | H3.1K23Ac [pic,prop_d0] | 1      | 1203.6844 | 0.0e+0 |
| 20130708_293THistones_propL2xvspropLpicL_H3incl_TMM | H3.1K23Ac [prop_d0]     | 2      | 570.8404  | 2.0e+9 |
| 20130708_293THistones_propL2xvspropLpicL_H3incl_TMM | H3.1K23Ac [pic,prop_d0] | 2      | 602.3459  | 8.3e+4 |
| 20130708_293THistones_propL2xvspropLpicL_H3incl_TMM | H3.1K23Ac [prop_d0]     | 3      | 380.8960  | 0.0e+0 |
| 20130708_293THistones_propL2xvspropLpicL_H3incl_TMM | H3.1K23Ac [pic,prop_d0] | 3      | 401.8997  | 0.0e+0 |

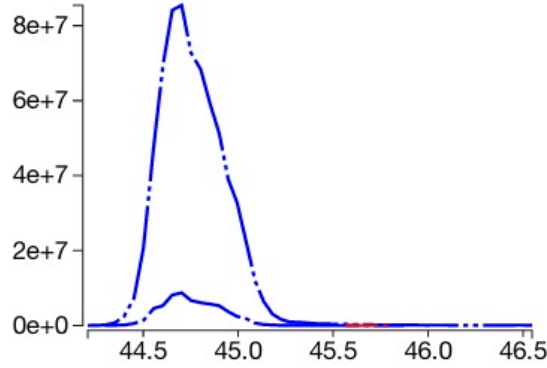

### Quanti event: 59.0-66.6min

| injection                                           | peptide                 | charge | m/z       | auc    |
|-----------------------------------------------------|-------------------------|--------|-----------|--------|
| 20130708_293THistones_propL2xvspropLpicL_H3incl_TMM | H3.1K23Ac [prop_d0]     | 1      | 1140.6735 | 7.6e+4 |
| 20130708_293THistones_propL2xvspropLpicL_H3incl_TMM | H3.1K23Ac [pic,prop_d0] | 1      | 1203.6844 | 1.4e+9 |
| 20130708_293THistones_propL2xvspropLpicL_H3incl_TMM | H3.1K23Ac [prop_d0]     | 2      | 570.8404  | 6.4e+4 |
| 20130708_293THistones_propL2xvspropLpicL_H3incl_TMM | H3.1K23Ac [pic,prop_d0] | 2      | 602.3459  | 5.0e+9 |
| 20130708_293THistones_propL2xvspropLpicL_H3incl_TMM | H3.1K23Ac [prop_d0]     | 3      | 380.8960  | 0.0e+0 |
| 20130708_293THistones_propL2xvspropLpicL_H3incl_TMM | H3.1K23Ac [pic,prop_d0] | 3      | 401.8997  | 0.0e+0 |

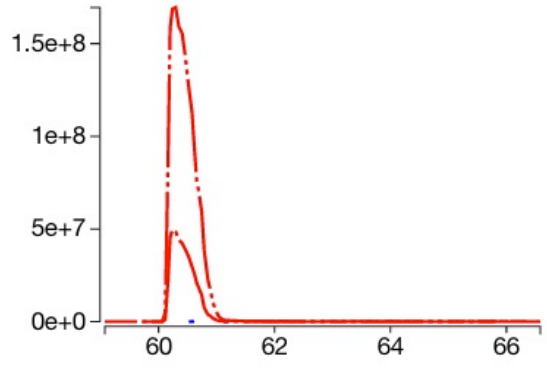



# H3\_K18-R26: Prop-KAcQLATKAAR MS/MS

### Experimental spectrum

scan 7987  
 retention time 44.4min  
 precursor m/z 570.8387  
 precursor charge 2+

### Theoretical

MH<sup>2+</sup> 570.8404  
 MH Δ<sub>mass</sub> Da -0.0033  
 MH Δ<sub>mass</sub> ppm -2.9

### edit peptide

{Propionyl}K{Acetyl}QLATK{Propionyl}AAR align

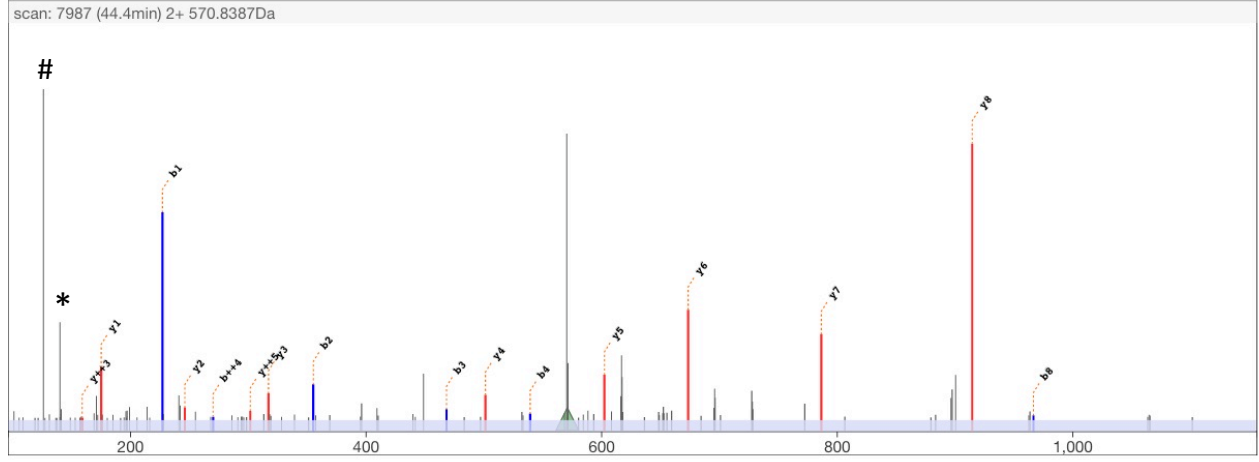

|   | b++    | b       |           | y       | y++    |   |
|---|--------|---------|-----------|---------|--------|---|
|   |        |         | Propionyl | 1084.65 | 542.83 | 9 |
| 1 | 114.07 | 227.14  | K         | 914.54  | 457.77 | 8 |
| 2 | 178.10 | 355.20  | Acetyl    | 786.48  | 393.75 | 7 |
| 3 | 234.64 | 468.28  | Q         | 673.40  | 337.20 | 6 |
| 4 | 270.16 | 539.32  | L         | 602.36  | 301.68 | 5 |
| 5 | 320.69 | 640.37  | A         | 501.31  | 251.16 | 4 |
| 6 | 412.75 | 824.49  | T         | 317.19  | 159.10 | 3 |
| 7 | 448.27 | 895.52  | Propionyl | 246.16  | 123.58 | 2 |
| 8 | 483.78 | 966.56  | K         | 175.12  | 88.06  | 1 |
| 9 | 561.84 | 1122.66 | A         |         |        |   |
|   |        |         | R         |         |        |   |

\* = 140Da diagnostic ion  
 # = 126Da diagnostic ion

MS2 for PIC-K18Ac is mixed with PIC-K23Ac MS2 (y4-y8 denoted by arrows):

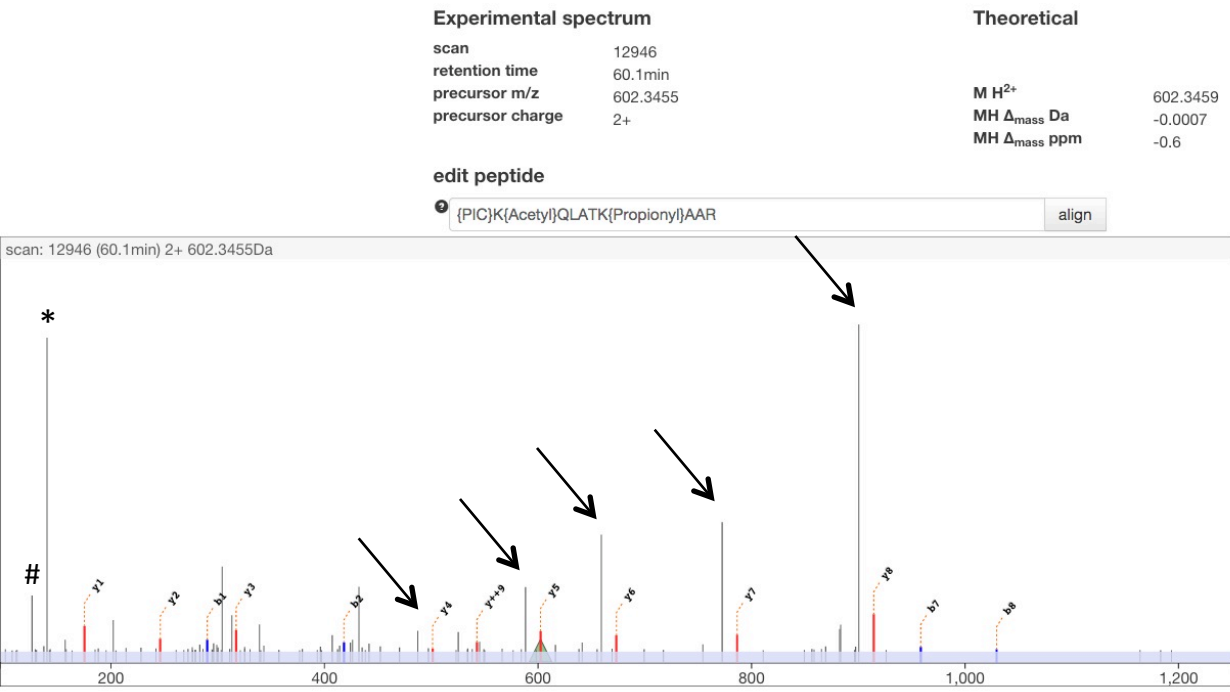

|   | b++    | b       |           | y       | y++    |   |
|---|--------|---------|-----------|---------|--------|---|
|   | 60.53  | 120.04  | PIC       | 1084.65 | 542.83 | 9 |
| 1 | 145.58 | 290.15  | K         | 914.54  | 457.77 | 8 |
| 2 | 209.61 | 418.21  | Acetyl    | 786.48  | 393.75 | 7 |
| 3 | 266.15 | 531.29  | Q         | 673.40  | 337.20 | 6 |
| 4 | 301.67 | 602.33  | L         | 602.36  | 301.68 | 5 |
| 5 | 352.19 | 703.38  | A         | 501.31  | 251.16 | 4 |
| 6 | 444.25 | 887.50  | T         | 317.19  | 159.10 | 3 |
| 7 | 479.77 | 958.54  | Propionyl | 246.16  | 123.58 | 2 |
| 8 | 515.29 | 1029.57 | K         | 175.12  | 88.06  | 1 |
| 9 | 593.34 | 1185.67 | A         |         |        |   |
|   |        |         | R         |         |        |   |

\* = 140Da diagnostic ion  
 # = 126Da diagnostic ion

# H3\_K18-R26: KQLATKAcAAR

Peak overlaps with K18Ac, more abundant mark. AUC determined on MS2 level (see page 159).

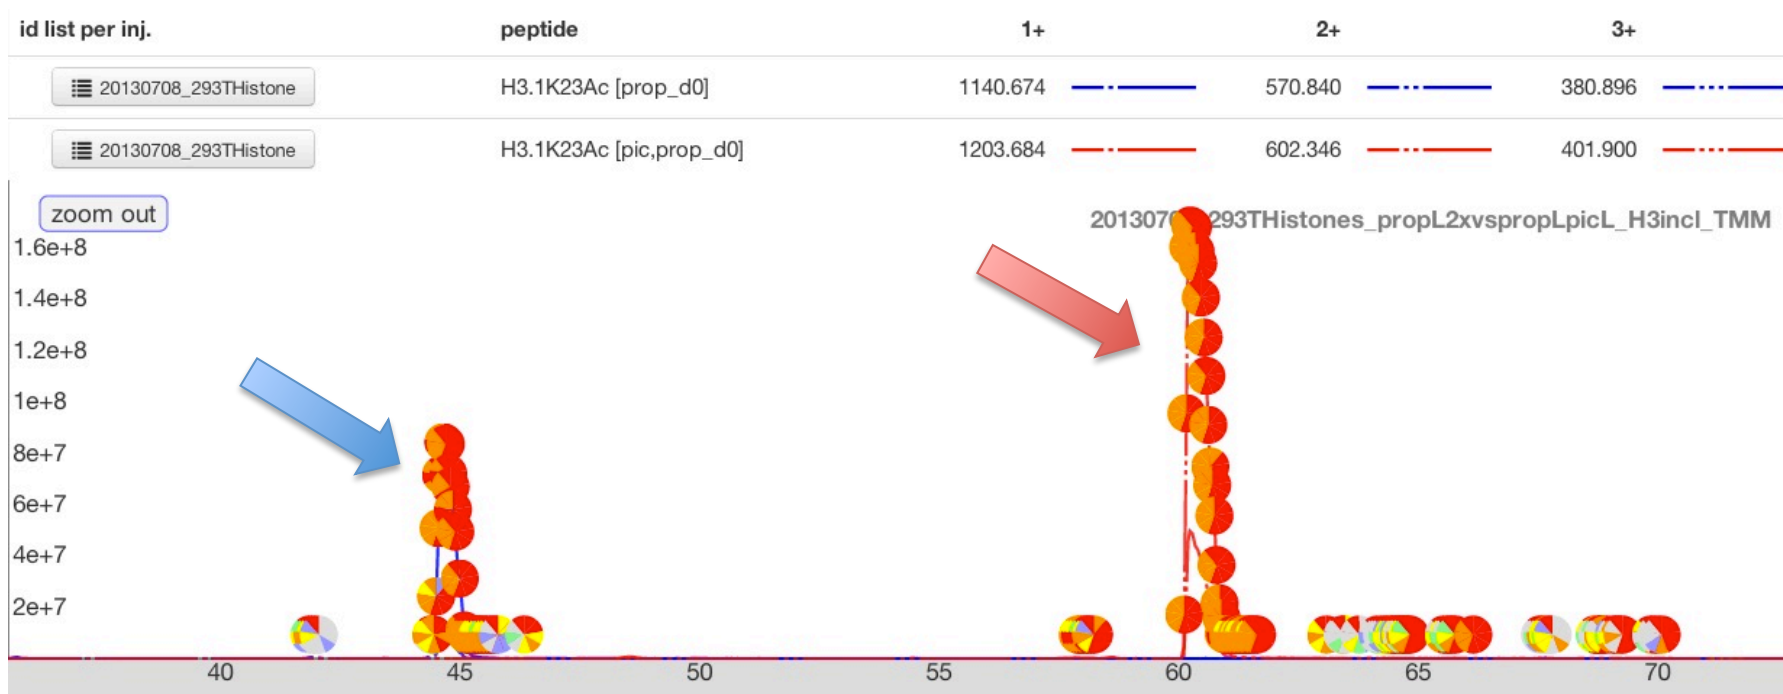

# H3\_K18-R26: Prop-KQLATKAcAAR MS/MS

### Experimental spectrum

scan 8082  
 retention time 44.7min  
 precursor m/z 570.8393  
 precursor charge 2+

### Theoretical

M H<sup>2+</sup> 570.8404  
 MH Δ<sub>mass</sub> Da -0.0022  
 MH Δ<sub>mass</sub> ppm -1.9

### edit peptide

{Propionyl}K{Propionyl}QLATK{Acetyl}AAR align

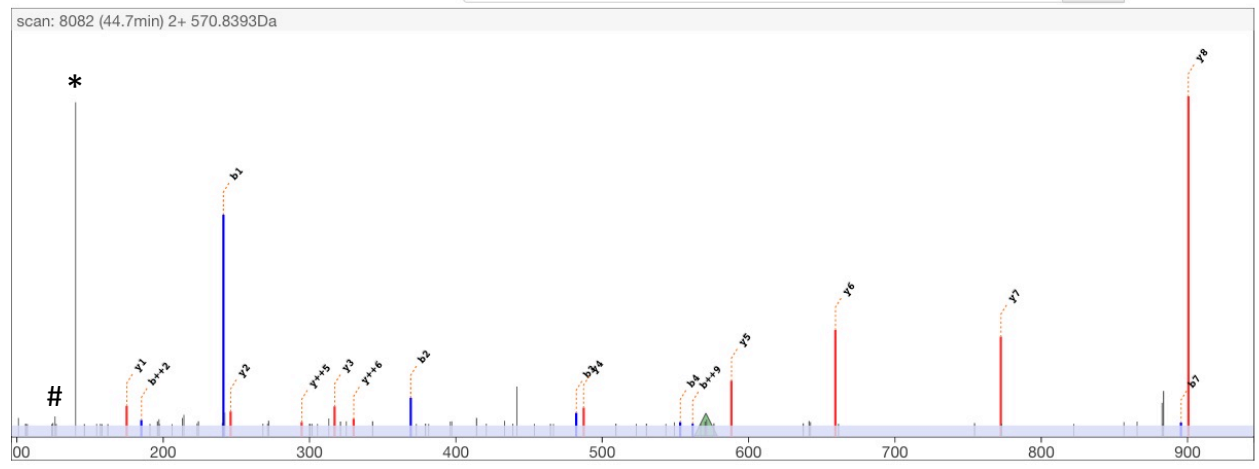

|   | b++    | b       |           | y       | y++    |   |
|---|--------|---------|-----------|---------|--------|---|
|   |        |         | Propionyl | 1084.65 | 542.83 | 9 |
| 1 | 121.08 | 241.15  | K         | 900.53  | 450.77 | 8 |
| 2 | 185.11 | 369.21  | Propionyl | 772.47  | 386.74 | 7 |
| 3 | 241.65 | 482.30  | L         | 659.38  | 330.20 | 6 |
| 4 | 277.17 | 553.33  | A         | 588.35  | 294.68 | 5 |
| 5 | 327.69 | 654.38  | T         | 487.30  | 244.15 | 4 |
| 6 | 412.75 | 824.49  | K         | 317.19  | 159.10 | 3 |
| 7 | 448.27 | 895.52  | Acetyl    | 246.16  | 123.58 | 2 |
| 8 | 483.78 | 966.56  | A         | 175.12  | 88.06  | 1 |
| 9 | 561.84 | 1122.66 | R         |         |        |   |

\* = 140Da diagnostic ion  
 # = 126Da diagnostic ion

**Experimental spectrum**

scan 12994  
 retention time 60.2min  
 precursor m/z 602.3452  
 precursor charge 2+

**Theoretical**

M H<sup>2+</sup> 602.3459  
 MH Δ<sub>mass</sub> Da -0.0013  
 MH Δ<sub>mass</sub> ppm -1.1

**edit peptide**

{PIC}K{Propionyl}QLATK{Acetyl}AAR align

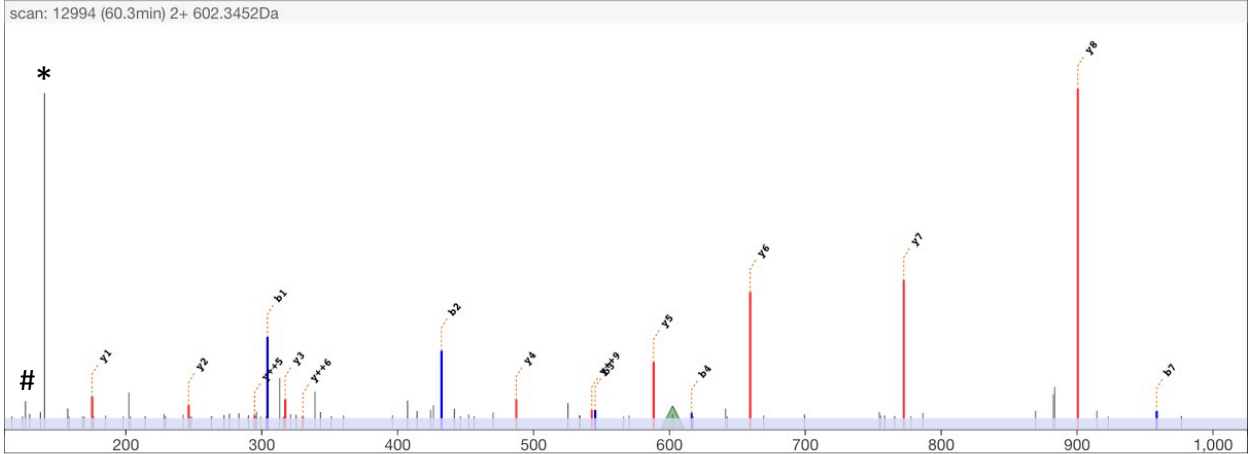

|   | b++    | b       |                                                  | y       | y++    |   |
|---|--------|---------|--------------------------------------------------|---------|--------|---|
|   | 60.53  | 120.04  | PIC<br>K<br>Q<br>L<br>A<br>T<br>K<br>A<br>A<br>R | 1084.65 | 542.83 | 9 |
| 1 | 152.59 | 304.17  |                                                  | 900.53  | 450.77 | 8 |
| 2 | 216.62 | 432.22  |                                                  | 772.47  | 386.74 | 7 |
| 3 | 273.16 | 545.31  |                                                  | 659.38  | 330.20 | 6 |
| 4 | 308.68 | 616.35  |                                                  | 588.35  | 294.68 | 5 |
| 5 | 359.20 | 717.39  |                                                  | 487.30  | 244.15 | 4 |
| 6 | 444.25 | 887.50  |                                                  | 317.19  | 159.10 | 3 |
| 7 | 479.77 | 958.54  |                                                  | 246.16  | 123.58 | 2 |
| 8 | 515.29 | 1029.57 |                                                  | 175.12  | 88.06  | 1 |
| 9 | 593.34 | 1185.67 |                                                  |         |        |   |

\* = 140Da diagnostic ion  
 # = 126Da diagnostic ion

# H3\_K18-R26: KQLATKMe1AAR

Double-peaks for PIC treatment (see K18Me1, slide #84): Earlier eluting peak is K23Me1!

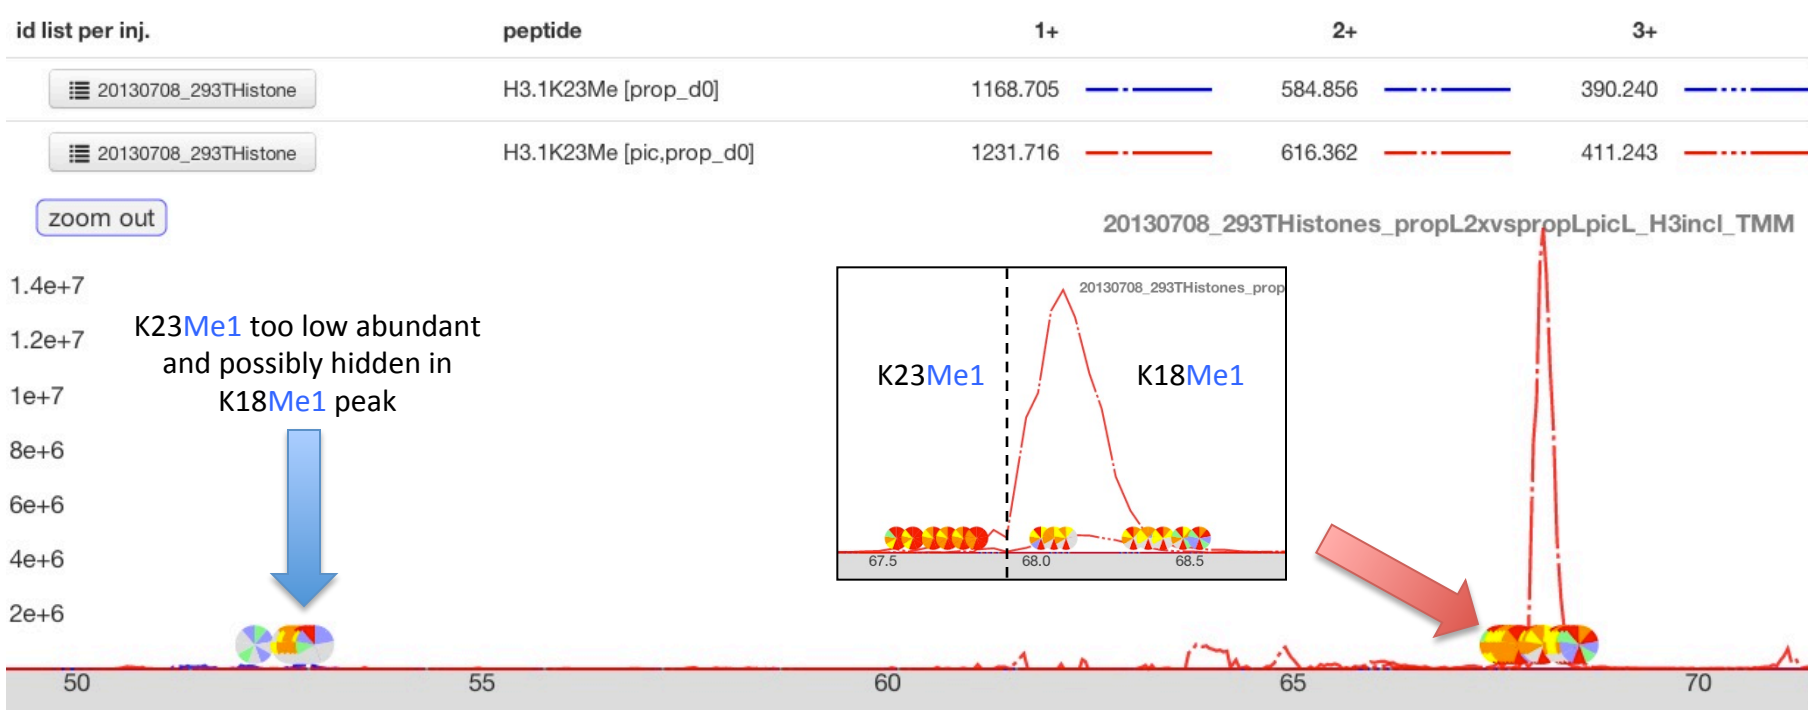

Quanti event: 67.4-67.9min

| injection                                           | peptide                 | charge | m/z       | auc    |
|-----------------------------------------------------|-------------------------|--------|-----------|--------|
| 20130708_293THistones_propL2xvspropLpicL_H3incl_TMM | H3.1K23Me [prop_d0]     | 1      | 1168.7048 | 0.0e+0 |
| 20130708_293THistones_propL2xvspropLpicL_H3incl_TMM | H3.1K23Me [pic,prop_d0] | 1      | 1231.7157 | 6.4e+6 |
| 20130708_293THistones_propL2xvspropLpicL_H3incl_TMM | H3.1K23Me [prop_d0]     | 2      | 584.8561  | 0.0e+0 |
| 20130708_293THistones_propL2xvspropLpicL_H3incl_TMM | H3.1K23Me [pic,prop_d0] | 2      | 616.3615  | 6.9e+6 |
| 20130708_293THistones_propL2xvspropLpicL_H3incl_TMM | H3.1K23Me [prop_d0]     | 3      | 390.2398  | 0.0e+0 |
| 20130708_293THistones_propL2xvspropLpicL_H3incl_TMM | H3.1K23Me [pic,prop_d0] | 3      | 411.2434  | 0.0e+0 |

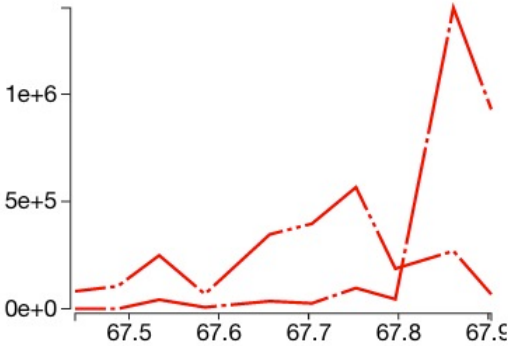

Propionylation K23Me1 not found.

**Experimental spectrum**

scan 15602  
 retention time 67.8min  
 precursor m/z 616.3618  
 precursor charge 2+

**Theoretical**

M H<sup>2+</sup> 616.3615  
 MH Δ<sub>mass</sub> Da 0.0006  
 MH Δ<sub>mass</sub> ppm 0.5

**edit peptide**

{PIC}K{Propionyl}QLATK{Methyl,Propionyl}AAR

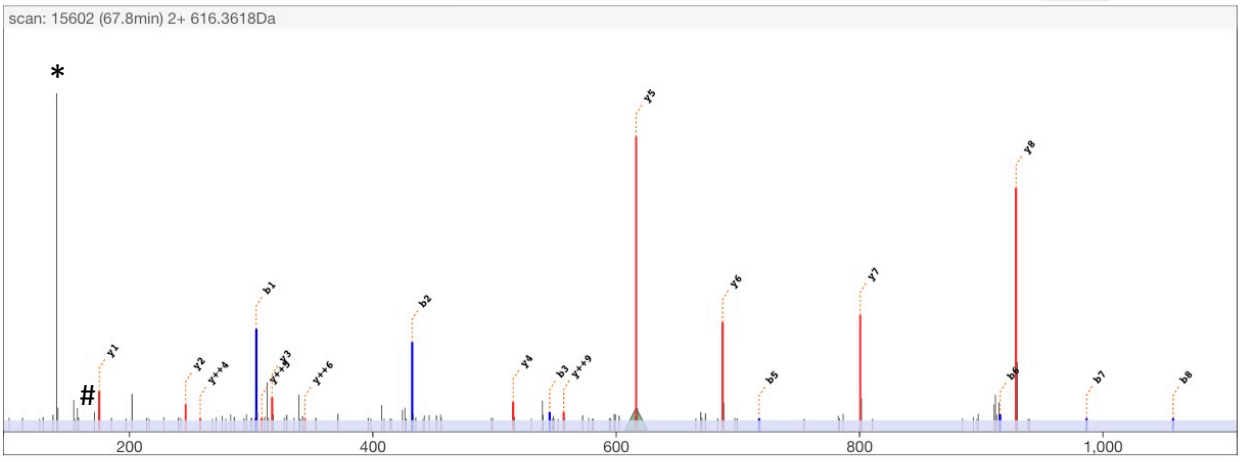

|   | b++    | b       |                  | y       | y++    |   |
|---|--------|---------|------------------|---------|--------|---|
|   | 60.53  | 120.04  | PIC              | 1112.68 | 556.84 | 9 |
| 1 | 152.59 | 304.17  | K                | 928.56  | 464.78 | 8 |
| 2 | 216.62 | 432.22  | Propionyl        | 800.50  | 400.75 | 7 |
| 3 | 273.16 | 545.31  | Q                | 687.41  | 344.21 | 6 |
| 4 | 308.68 | 616.35  | L                | 616.38  | 308.69 | 5 |
| 5 | 359.20 | 717.39  | A                | 515.33  | 258.17 | 4 |
| 6 | 458.27 | 915.53  | T                | 317.19  | 159.10 | 3 |
| 7 | 493.79 | 986.57  | Methyl,Propionyl | 246.16  | 123.58 | 2 |
| 8 | 529.31 | 1057.60 | K                | 175.12  | 88.06  | 1 |
| 9 | 607.36 | 1213.71 | A                |         |        |   |
|   |        |         | R                |         |        |   |

\* = 140Da diagnostic ion  
 # = 171Da diagnostic ion



# H3\_K18-R26:

## KQLATPropKAcAAR

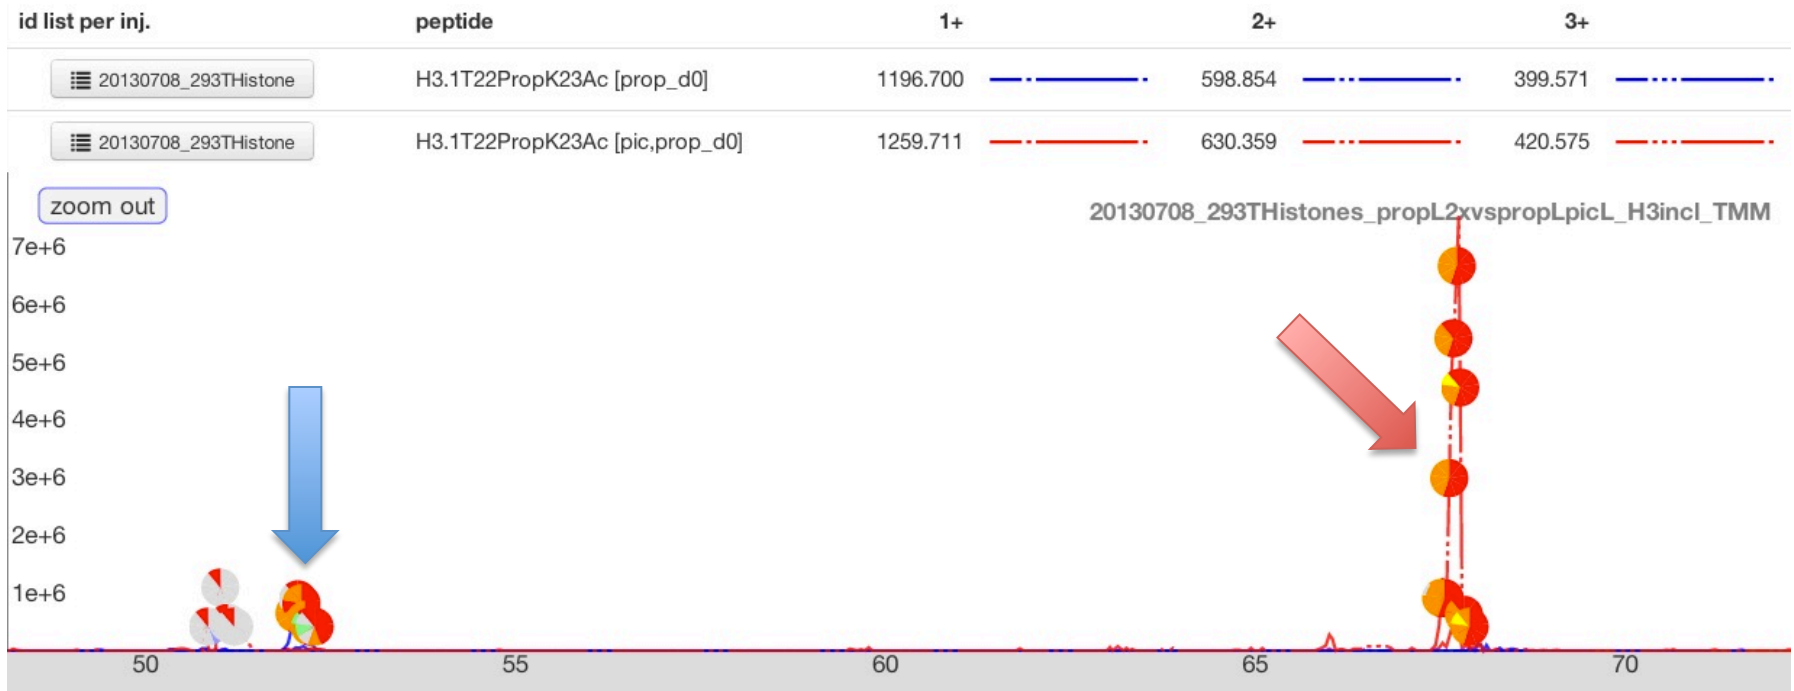

## Quanti event: 51.8-52.5min

| injection                                           | peptide                        | charge | m/z       | auc    |
|-----------------------------------------------------|--------------------------------|--------|-----------|--------|
| 20130708_293THistones_propL2xvspropLpicL_H3incl_TMM | H3.1T22PropK23Ac [prop_d0]     | 1      | 1196.6998 | 7.0e+5 |
| 20130708_293THistones_propL2xvspropLpicL_H3incl_TMM | H3.1T22PropK23Ac [pic,prop_d0] | 1      | 1259.7107 | 0.0e+0 |
| 20130708_293THistones_propL2xvspropLpicL_H3incl_TMM | H3.1T22PropK23Ac [prop_d0]     | 2      | 598.8535  | 1.1e+7 |
| 20130708_293THistones_propL2xvspropLpicL_H3incl_TMM | H3.1T22PropK23Ac [pic,prop_d0] | 2      | 630.3590  | 3.6e+5 |
| 20130708_293THistones_propL2xvspropLpicL_H3incl_TMM | H3.1T22PropK23Ac [prop_d0]     | 3      | 399.5714  | 0.0e+0 |
| 20130708_293THistones_propL2xvspropLpicL_H3incl_TMM | H3.1T22PropK23Ac [pic,prop_d0] | 3      | 420.5751  | 0.0e+0 |

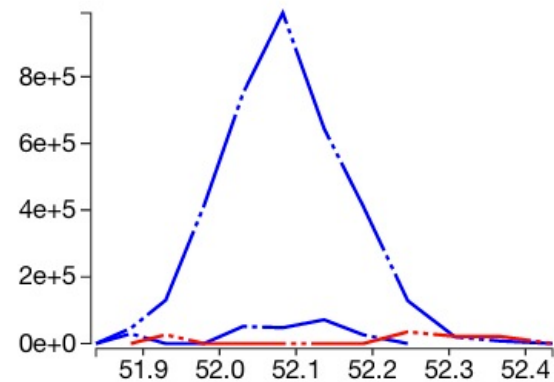

## Quanti event: 67.4-68.0min

| injection                                           | peptide                        | charge | m/z       | auc    |
|-----------------------------------------------------|--------------------------------|--------|-----------|--------|
| 20130708_293THistones_propL2xvspropLpicL_H3incl_TMM | H3.1T22PropK23Ac [prop_d0]     | 1      | 1196.6998 | 0.0e+0 |
| 20130708_293THistones_propL2xvspropLpicL_H3incl_TMM | H3.1T22PropK23Ac [pic,prop_d0] | 1      | 1259.7107 | 5.7e+6 |
| 20130708_293THistones_propL2xvspropLpicL_H3incl_TMM | H3.1T22PropK23Ac [prop_d0]     | 2      | 598.8535  | 1.3e+5 |
| 20130708_293THistones_propL2xvspropLpicL_H3incl_TMM | H3.1T22PropK23Ac [pic,prop_d0] | 2      | 630.3590  | 6.7e+7 |
| 20130708_293THistones_propL2xvspropLpicL_H3incl_TMM | H3.1T22PropK23Ac [prop_d0]     | 3      | 399.5714  | 0.0e+0 |
| 20130708_293THistones_propL2xvspropLpicL_H3incl_TMM | H3.1T22PropK23Ac [pic,prop_d0] | 3      | 420.5751  | 0.0e+0 |

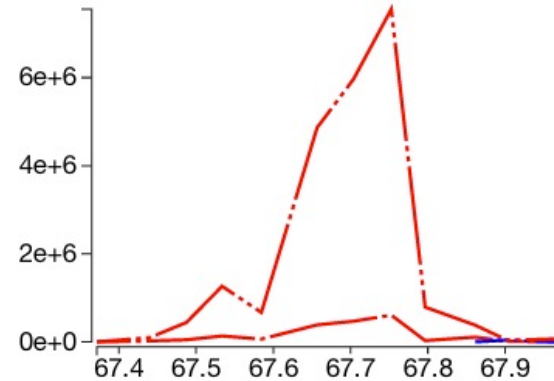

**Experimental spectrum**

scan 10425  
 retention time 52.1min  
 precursor m/z 598.8525  
 precursor charge 2+

**Theoretical**

M H<sup>2+</sup> 598.8535  
 MH Δ<sub>mass</sub> Da -0.0021  
 MH Δ<sub>mass</sub> ppm -1.7

**edit peptide**

{Propionyl}K{Propionyl}QLAT{Propionyl}K{Acetyl}AAR align

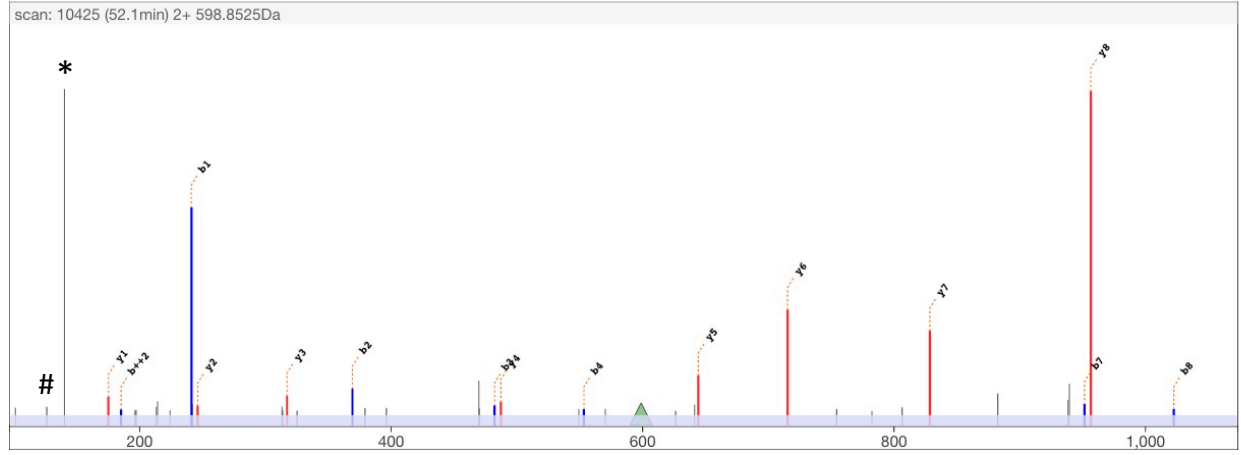

|   | b++    | b       |             | y       | y++    |   |
|---|--------|---------|-------------|---------|--------|---|
|   |        |         | Propionyl   | 1140.67 | 570.84 | 9 |
| 1 | 121.08 | 241.15  | K           |         |        | 8 |
| 2 | 185.11 | 369.21  | Propionyl Q | 956.55  | 478.78 | 7 |
| 3 | 241.65 | 482.30  | L           | 828.49  | 414.75 | 6 |
| 4 | 277.17 | 553.33  | A           | 715.41  | 358.21 | 5 |
| 5 | 355.71 | 710.41  | T           | 644.37  | 322.69 | 4 |
| 6 | 440.76 | 880.51  | Propionyl K | 487.30  | 244.15 | 3 |
| 7 | 476.28 | 951.55  | Acetyl A    | 317.19  | 159.10 | 2 |
| 8 | 511.80 | 1022.59 | A           | 246.16  | 123.58 | 1 |
| 9 | 589.85 | 1178.69 | R           | 175.12  | 88.06  |   |

\* = 140Da diagnostic ion  
 # = 126Da diagnostic ion

### Experimental spectrum

scan 15559  
 retention time 67.7min  
 precursor m/z 630.3594  
 precursor charge 2+

### Theoretical

M H<sup>2+</sup> 630.3590  
 MH  $\Delta_{mass}$  Da 0.0008  
 MH  $\Delta_{mass}$  ppm 0.7

### edit peptide

{PIC}K{Propionyl}QLAT{Propionyl}K{Acetyl}AAR align

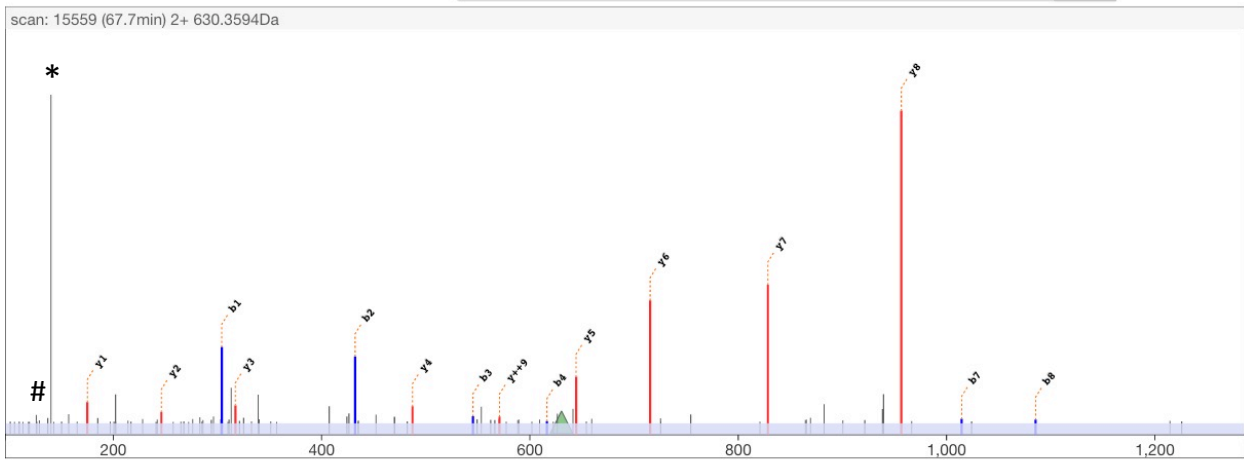

|   | b++    | b       |           | y       | y++    |   |
|---|--------|---------|-----------|---------|--------|---|
|   | 60.53  | 120.04  | PIC       | 1140.67 | 570.84 | 9 |
| 1 | 152.59 | 304.17  | K         | 956.55  | 478.78 | 8 |
| 2 | 216.62 | 432.22  | Propionyl | 828.49  | 414.75 | 7 |
| 3 | 273.16 | 545.31  | Q         | 715.41  | 358.21 | 6 |
| 4 | 308.68 | 616.35  | L         | 644.37  | 322.69 | 5 |
| 5 | 387.21 | 773.42  | A         | 487.30  | 244.15 | 4 |
| 6 | 472.27 | 943.52  | T         | 317.19  | 159.10 | 3 |
| 7 | 507.78 | 1014.56 | Propionyl | 246.16  | 123.58 | 2 |
| 8 | 543.30 | 1085.60 | K         | 175.12  | 88.06  | 1 |
| 9 | 621.35 | 1241.70 | Acetyl    |         |        |   |
|   |        |         | A         |         |        |   |
|   |        |         | A         |         |        |   |
|   |        |         | R         |         |        |   |

\* = 140Da diagnostic ion  
 # = 126Da diagnostic ion

# H3\_K18-R26:

## KAcQLATKAcAAR

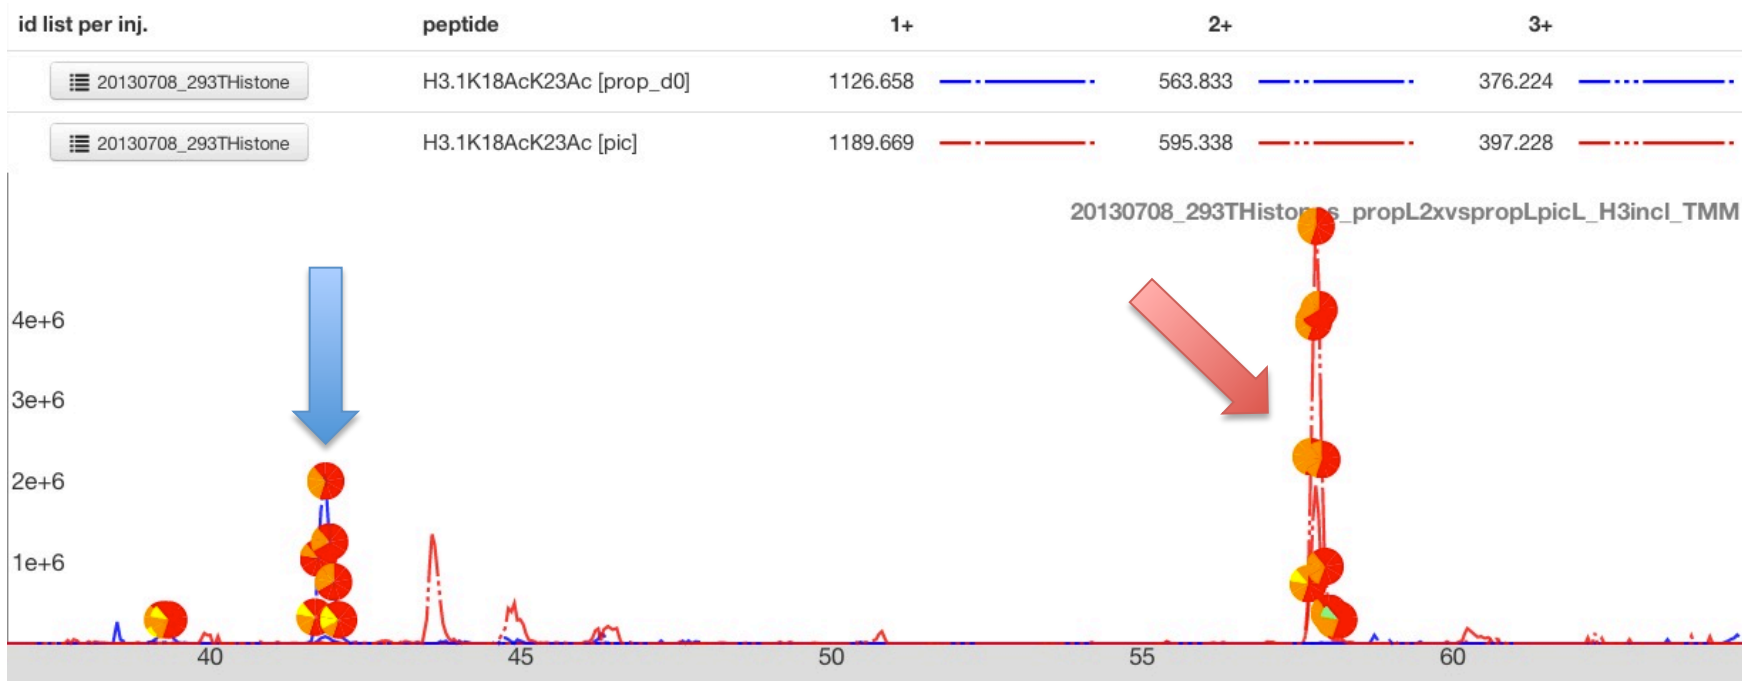

Quanti event: 41.4-42.4min

| injection                                           | peptide                  | charge | m/z       | auc    |
|-----------------------------------------------------|--------------------------|--------|-----------|--------|
| 20130708_293THistones_propL2xvspropLpicL_H3incl_TMM | H3.1K18AcK23Ac [prop_d0] | 1      | 1126.6579 | 1.1e+6 |
| 20130708_293THistones_propL2xvspropLpicL_H3incl_TMM | H3.1K18AcK23Ac [pic]     | 1      | 1189.6688 | 0.0e+0 |
| 20130708_293THistones_propL2xvspropLpicL_H3incl_TMM | H3.1K18AcK23Ac [prop_d0] | 2      | 563.8326  | 2.8e+7 |
| 20130708_293THistones_propL2xvspropLpicL_H3incl_TMM | H3.1K18AcK23Ac [pic]     | 2      | 595.3380  | 1.0e+5 |
| 20130708_293THistones_propL2xvspropLpicL_H3incl_TMM | H3.1K18AcK23Ac [prop_d0] | 3      | 376.2241  | 4.4e+4 |
| 20130708_293THistones_propL2xvspropLpicL_H3incl_TMM | H3.1K18AcK23Ac [pic]     | 3      | 397.2278  | 0.0e+0 |

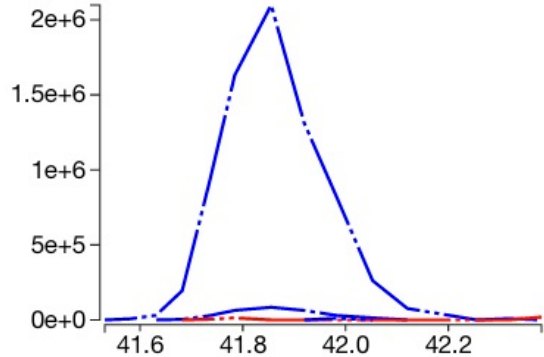

Quanti event: 57.3-58.5min

| injection                                           | peptide                  | charge | m/z       | auc    |
|-----------------------------------------------------|--------------------------|--------|-----------|--------|
| 20130708_293THistones_propL2xvspropLpicL_H3incl_TMM | H3.1K18AcK23Ac [prop_d0] | 1      | 1126.6579 | 0.0e+0 |
| 20130708_293THistones_propL2xvspropLpicL_H3incl_TMM | H3.1K18AcK23Ac [pic]     | 1      | 1189.6688 | 2.1e+7 |
| 20130708_293THistones_propL2xvspropLpicL_H3incl_TMM | H3.1K18AcK23Ac [prop_d0] | 2      | 563.8326  | 0.0e+0 |
| 20130708_293THistones_propL2xvspropLpicL_H3incl_TMM | H3.1K18AcK23Ac [pic]     | 2      | 595.3380  | 5.7e+7 |
| 20130708_293THistones_propL2xvspropLpicL_H3incl_TMM | H3.1K18AcK23Ac [prop_d0] | 3      | 376.2241  | 7.1e+4 |
| 20130708_293THistones_propL2xvspropLpicL_H3incl_TMM | H3.1K18AcK23Ac [pic]     | 3      | 397.2278  | 0.0e+0 |

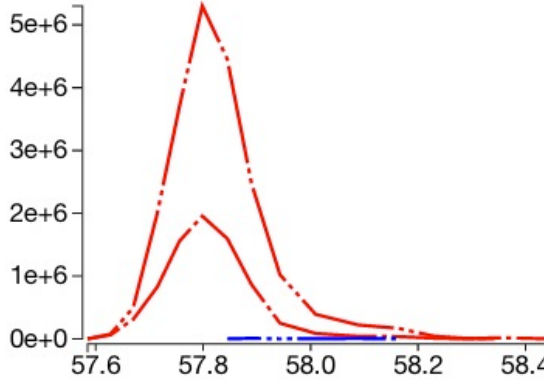

### Experimental spectrum

scan 7218  
 retention time 41.9min  
 precursor m/z 563.8315  
 precursor charge 2+

### Theoretical

M H<sup>2+</sup> 563.8326  
 MH  $\Delta_{mass}$  Da -0.0022  
 MH  $\Delta_{mass}$  ppm -1.9

### edit peptide

{Propionyl}K{Acetyl}QLATK{Acetyl}AAR align

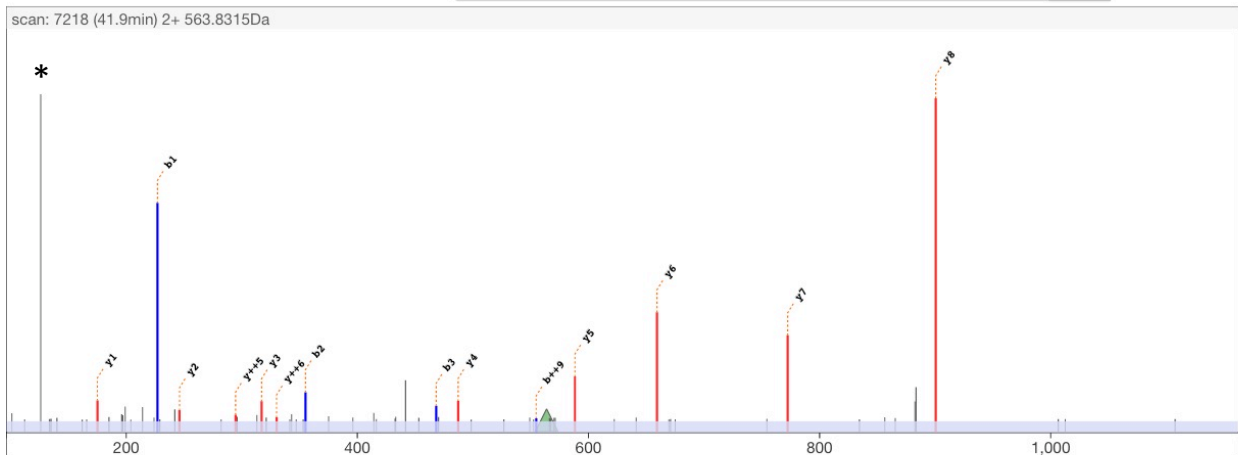

|   | b++    | b       |           | y       | y++    |   |
|---|--------|---------|-----------|---------|--------|---|
|   |        |         | Propionyl | 1070.63 | 535.82 | 9 |
| 1 | 114.07 | 227.14  | K         |         |        |   |
|   |        |         | Acetyl    |         |        |   |
| 2 | 178.10 | 355.20  | Q         | 900.53  | 450.77 | 8 |
| 3 | 234.64 | 468.28  | L         | 772.47  | 386.74 | 7 |
| 4 | 270.16 | 539.32  | A         | 659.38  | 330.20 | 6 |
| 5 | 320.69 | 640.37  | T         | 588.35  | 294.68 | 5 |
| 6 | 405.74 | 810.47  | K         | 487.30  | 244.15 | 4 |
| 7 | 441.26 | 881.51  | Acetyl    |         |        |   |
| 8 | 476.78 | 952.55  | A         | 317.19  | 159.10 | 3 |
|   |        |         | A         | 246.16  | 123.58 | 2 |
| 9 | 554.83 | 1108.65 | R         | 175.12  | 88.06  | 1 |

\* = 126Da diagnostic ion

# H3\_K18-R26: PIC-KAcQLATKAcAAR MS/MS

### Experimental spectrum

scan 12178  
 retention time 57.8min  
 precursor m/z 595.3374  
 precursor charge 2+

### Theoretical

M H<sup>2+</sup> 595.3380  
 MH Δ<sub>mass</sub> Da -0.0013  
 MH Δ<sub>mass</sub> ppm -1.1

### edit peptide

{PIC}K{Acetyl}QLATK{Acetyl}AAR align

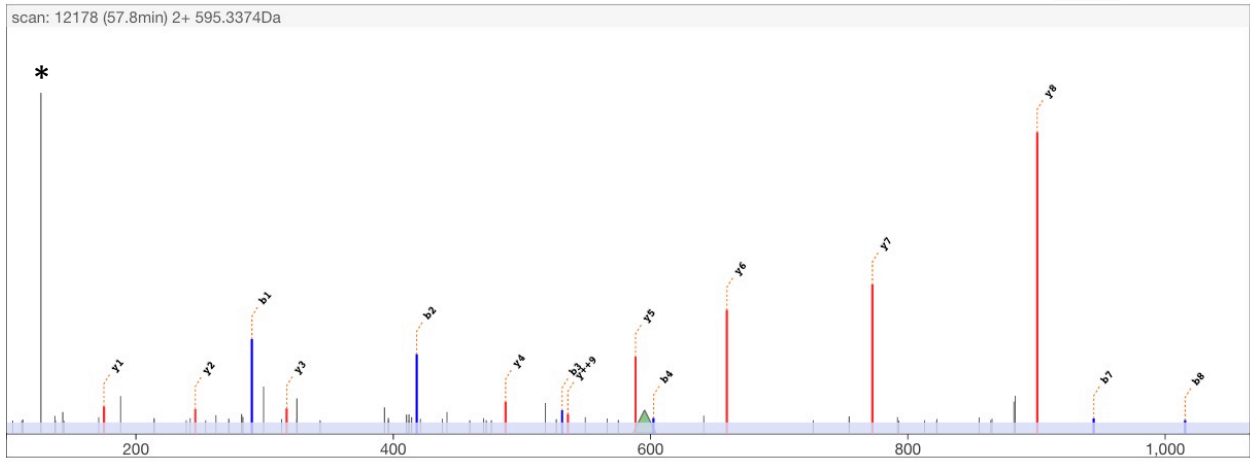

|   | b++    | b       |        | y       | y++    |   |
|---|--------|---------|--------|---------|--------|---|
|   | 60.53  | 120.04  | PIC    | 1070.63 | 535.82 | 9 |
| 1 | 145.58 | 290.15  | K      | 900.53  | 450.77 | 8 |
| 2 | 209.61 | 418.21  | Acetyl | 772.47  | 386.74 | 7 |
| 3 | 266.15 | 531.29  | Q      | 659.38  | 330.20 | 6 |
| 4 | 301.67 | 602.33  | L      | 588.35  | 294.68 | 5 |
| 5 | 352.19 | 703.38  | A      | 487.30  | 244.15 | 4 |
| 6 | 437.25 | 873.48  | T      | 317.19  | 159.10 | 3 |
| 7 | 472.76 | 944.52  | Acetyl | 246.16  | 123.58 | 2 |
| 8 | 508.28 | 1015.56 | K      | 175.12  | 88.06  | 1 |
| 9 | 586.33 | 1171.66 | A      |         |        |   |
|   |        |         | R      |         |        |   |

\* = 126Da diagnostic ion
