# Supplementary material
Source: PubMed Central journal article supplement (PMC4390259)
Supplement: supp_O114.046573_mcp.O114.046573-5.pdf [file supp_O114.046573_mcp.O114.046573-5.pdf]

**H3.1\_K27-R40**

**KSAPATGGVKKPHR**

# H3.1\_K27-R40: KSAPATGGVKKPHR

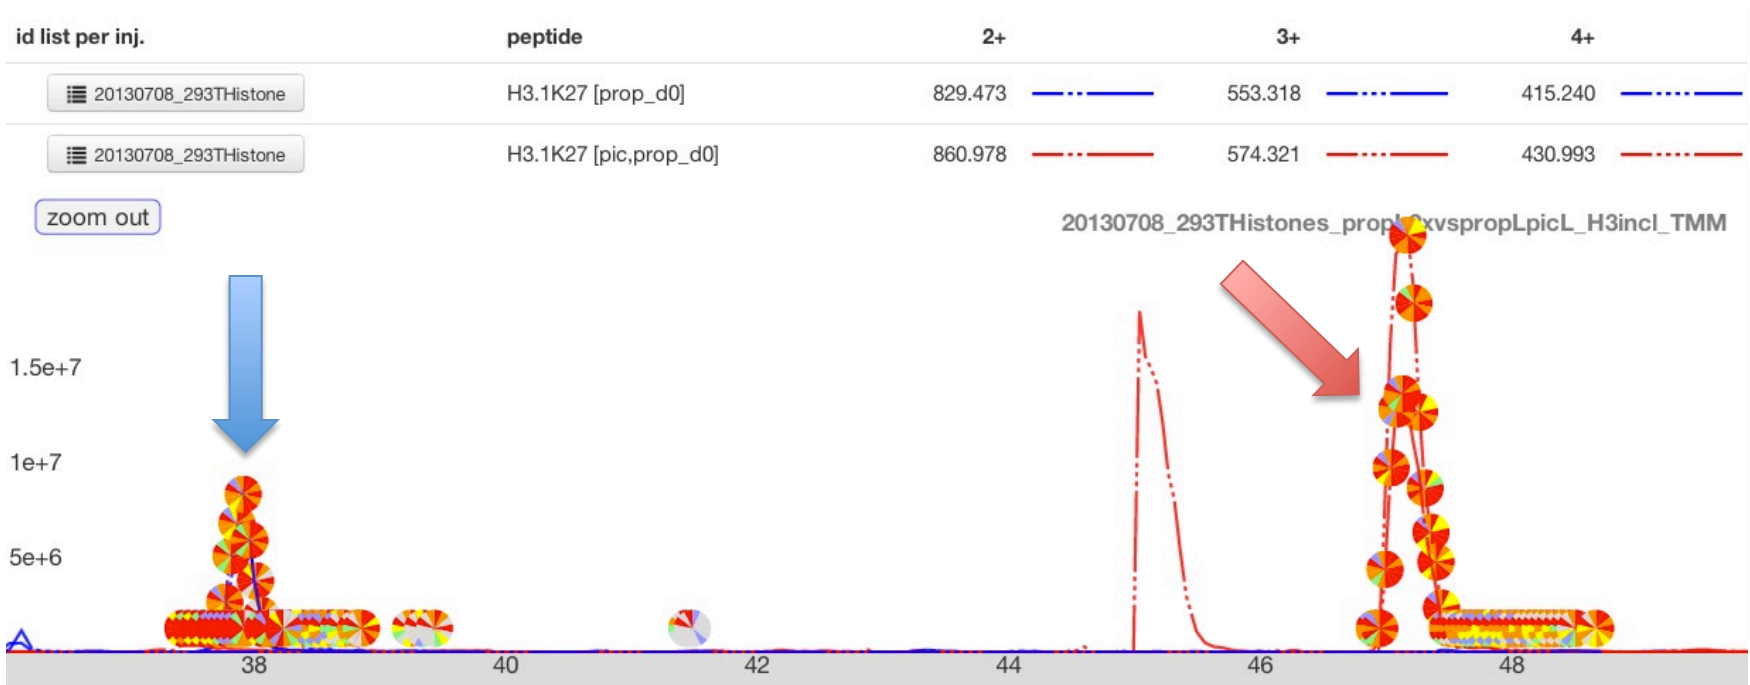

## Quanti event: 37.5-39.1min

| injection                                           | peptide               | charge | m/z      | auc    |
|-----------------------------------------------------|-----------------------|--------|----------|--------|
| 20130708_293THistones_propL2xvspropLpicL_H3incl_TMM | H3.1K27 [prop_d0]     | 2      | 829.4728 | 1.1e+8 |
| 20130708_293THistones_propL2xvspropLpicL_H3incl_TMM | H3.1K27 [pic,prop_d0] | 2      | 860.9783 | 0.0e+0 |
| 20130708_293THistones_propL2xvspropLpicL_H3incl_TMM | H3.1K27 [prop_d0]     | 3      | 553.3177 | 9.7e+7 |
| 20130708_293THistones_propL2xvspropLpicL_H3incl_TMM | H3.1K27 [pic,prop_d0] | 3      | 574.3213 | 8.4e+6 |
| 20130708_293THistones_propL2xvspropLpicL_H3incl_TMM | H3.1K27 [prop_d0]     | 4      | 415.2401 | 8.4e+4 |
| 20130708_293THistones_propL2xvspropLpicL_H3incl_TMM | H3.1K27 [pic,prop_d0] | 4      | 430.9928 | 0.0e+0 |

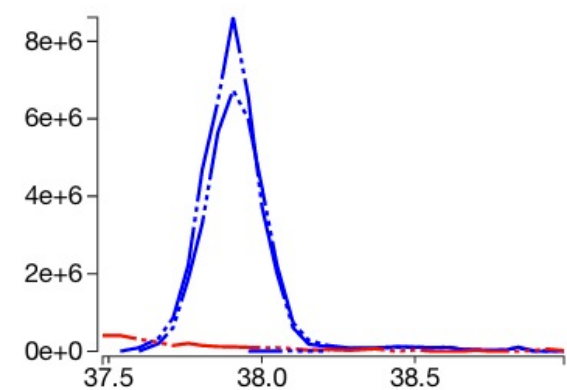

## Quanti event: 46.8-48.7min

| injection                                           | peptide               | charge | m/z      | auc    |
|-----------------------------------------------------|-----------------------|--------|----------|--------|
| 20130708_293THistones_propL2xvspropLpicL_H3incl_TMM | H3.1K27 [prop_d0]     | 2      | 829.4728 | 0.0e+0 |
| 20130708_293THistones_propL2xvspropLpicL_H3incl_TMM | H3.1K27 [pic,prop_d0] | 2      | 860.9783 | 2.6e+8 |
| 20130708_293THistones_propL2xvspropLpicL_H3incl_TMM | H3.1K27 [prop_d0]     | 3      | 553.3177 | 0.0e+0 |
| 20130708_293THistones_propL2xvspropLpicL_H3incl_TMM | H3.1K27 [pic,prop_d0] | 3      | 574.3213 | 4.0e+8 |
| 20130708_293THistones_propL2xvspropLpicL_H3incl_TMM | H3.1K27 [prop_d0]     | 4      | 415.2401 | 1.5e+6 |
| 20130708_293THistones_propL2xvspropLpicL_H3incl_TMM | H3.1K27 [pic,prop_d0] | 4      | 430.9928 | 0.0e+0 |

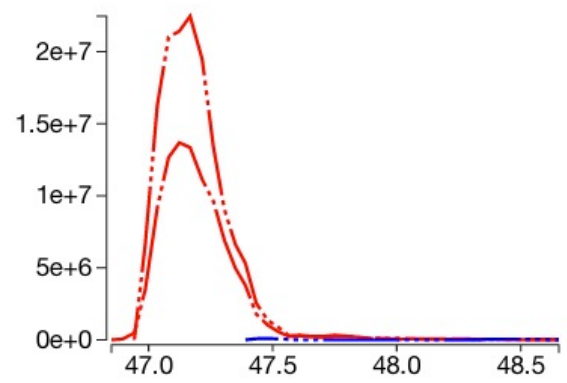

# H3.1\_K27-R40: Prop-KSAPATGGVKKPHR MS/MS

### Experimental spectrum

scan 6066  
 retention time 37.9min  
 precursor m/z 829.4711  
 precursor charge 2+

### Theoretical

M H<sup>2+</sup> 829.4728  
 MH  $\Delta_{mass}$  Da -0.0036  
 MH  $\Delta_{mass}$  ppm -2.1

### edit peptide

{Propionyl}K{Propionyl}SAPATGGV{Propionyl}K{Propionyl}PHR align

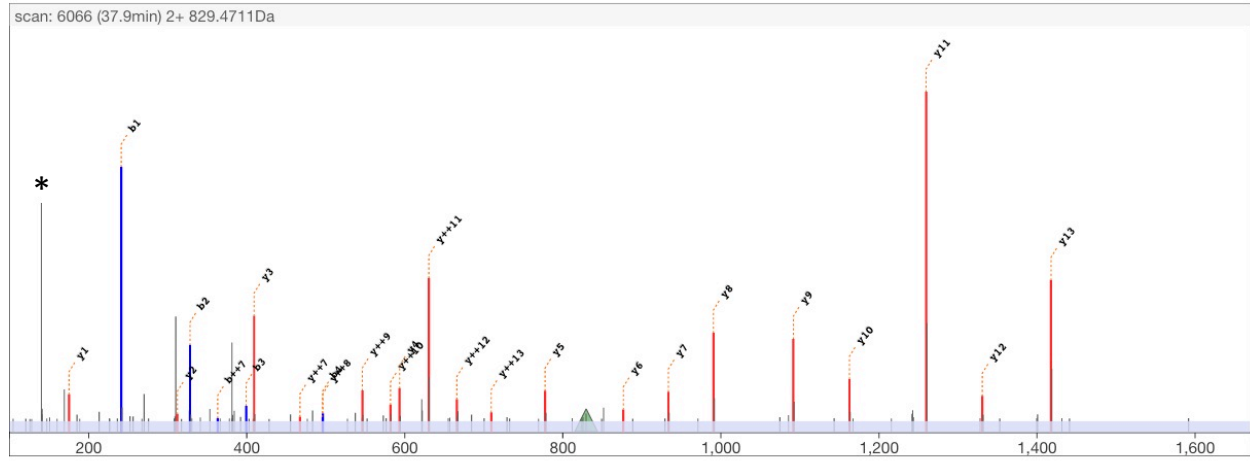

|    | b++    | b       |           | y       | y++    |
|----|--------|---------|-----------|---------|--------|
|    |        |         | Propionyl | 1601.91 | 801.46 |
| 1  | 121.08 | 241.15  | K         | 1417.79 | 709.40 |
| 2  | 164.60 | 328.19  | S         | 1330.76 | 665.88 |
| 3  | 200.12 | 399.22  | A         | 1259.72 | 630.36 |
| 4  | 248.64 | 496.28  | P         | 1162.67 | 581.84 |
| 5  | 284.16 | 567.31  | A         | 1091.63 | 546.32 |
| 6  | 334.68 | 668.36  | T         | 990.58  | 495.80 |
| 7  | 363.20 | 725.38  | G         | 933.56  | 467.29 |
| 8  | 391.71 | 782.40  | V         | 876.54  | 438.77 |
| 9  | 441.24 | 881.47  | K         | 777.47  | 389.24 |
| 10 | 533.30 | 1065.59 | Propionyl | 593.35  | 297.18 |
| 11 | 625.36 | 1249.72 | K         | 409.23  | 205.12 |
| 12 | 673.89 | 1346.77 | P         | 312.18  | 156.59 |
| 13 | 742.42 | 1483.83 | H         | 175.12  | 88.06  |
| 14 | 820.47 | 1639.93 | R         |         |        |

\* = 140Da diagnostic ion

# H3.1\_K27-R40: PIC-KSAPATGGVKKPHR MS/MS

### Experimental spectrum

scan 8802  
 retention time 47.1min  
 precursor m/z 860.9771  
 precursor charge 2+

### Theoretical

M H<sup>2+</sup> 860.9783  
 MH Δ<sub>mass</sub> Da -0.0025  
 MH Δ<sub>mass</sub> ppm -1.4

### edit peptide

{PIC}K{Propionyl}SAPATGGV{Propionyl}K{Propionyl}PHR align

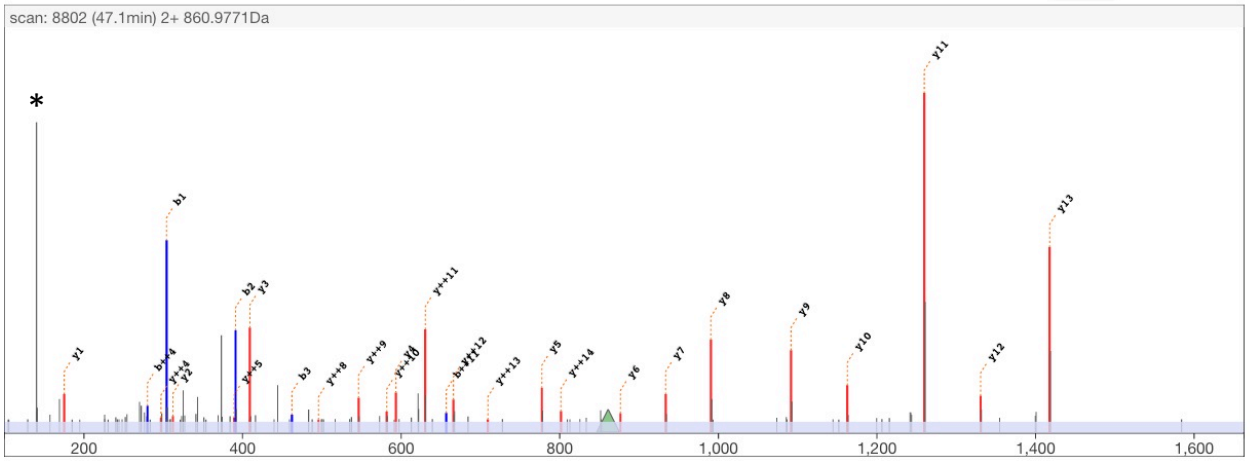

|    | b++    | b       |           | y       | y++    |    |
|----|--------|---------|-----------|---------|--------|----|
|    | 60.53  | 120.04  | PIC       | 1601.91 | 801.46 | 14 |
| 1  | 152.59 | 304.17  | K         | 1417.79 | 709.40 | 13 |
| 2  | 196.10 | 391.20  | S         | 1330.76 | 665.88 | 12 |
| 3  | 231.62 | 462.23  | A         | 1259.72 | 630.36 | 11 |
| 4  | 280.15 | 559.29  | P         | 1162.67 | 581.84 | 10 |
| 5  | 315.67 | 630.32  | A         | 1091.63 | 546.32 | 9  |
| 6  | 366.19 | 731.37  | T         | 990.58  | 495.80 | 8  |
| 7  | 394.70 | 788.39  | G         | 933.56  | 467.29 | 7  |
| 8  | 423.21 | 845.42  | V         | 876.54  | 438.77 | 6  |
| 9  | 472.75 | 944.48  | K         | 777.47  | 389.24 | 5  |
| 10 | 564.81 | 1128.60 | Propionyl | 593.35  | 297.18 | 4  |
| 11 | 656.87 | 1312.73 | K         | 409.23  | 205.12 | 3  |
| 12 | 705.39 | 1409.78 | Propionyl | 312.18  | 156.59 | 2  |
| 13 | 773.92 | 1546.84 | P         | 175.12  | 88.06  | 1  |
| 14 | 851.97 | 1702.94 | H         |         |        |    |
|    |        |         | R         |         |        |    |

\* = 140Da diagnostic ion

# H3.1\_K27-R40:

# KSPoAPATGGVKKPHR

Putative peak for Prop-labeled peptide but no MS2 detected.

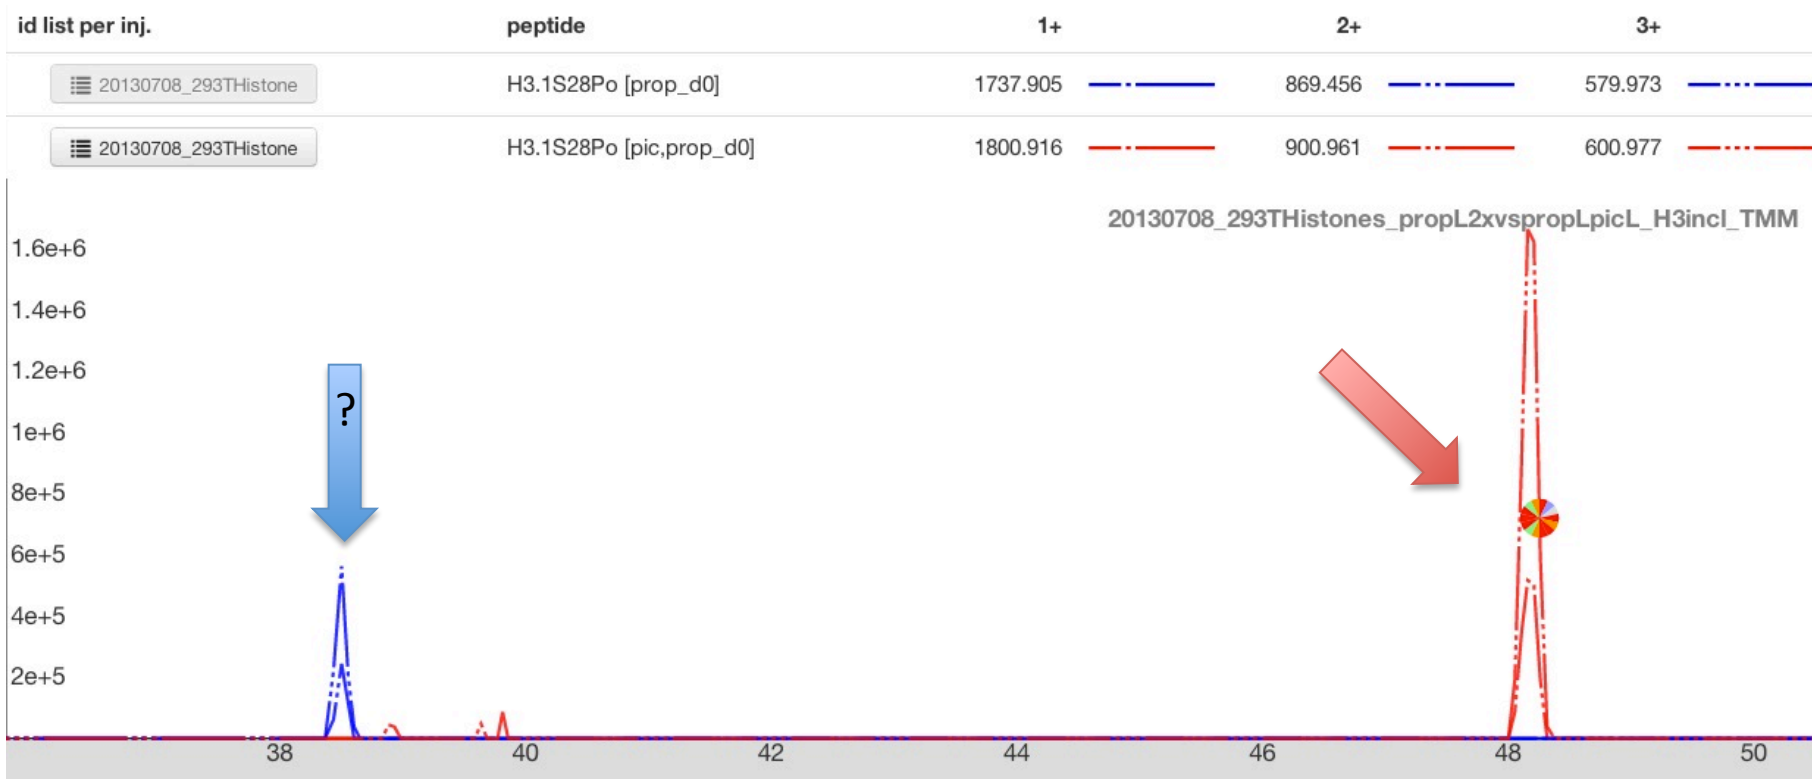

### Quanti event: 47.5-49.0min

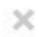

| injection                                           | peptide                 | charge | m/z       | auc    |
|-----------------------------------------------------|-------------------------|--------|-----------|--------|
| 20130708_293THistones_propL2xvspropLpicL_H3incl_TMM | H3.1S28Po [prop_d0]     | 1      | 1737.9047 | 0.0e+0 |
| 20130708_293THistones_propL2xvspropLpicL_H3incl_TMM | H3.1S28Po [pic,prop_d0] | 1      | 1800.9156 | 0.0e+0 |
| 20130708_293THistones_propL2xvspropLpicL_H3incl_TMM | H3.1S28Po [prop_d0]     | 2      | 869.4560  | 0.0e+0 |
| 20130708_293THistones_propL2xvspropLpicL_H3incl_TMM | H3.1S28Po [pic,prop_d0] | 2      | 900.9615  | 9.2e+5 |
| 20130708_293THistones_propL2xvspropLpicL_H3incl_TMM | H3.1S28Po [prop_d0]     | 3      | 579.9731  | 0.0e+0 |
| 20130708_293THistones_propL2xvspropLpicL_H3incl_TMM | H3.1S28Po [pic,prop_d0] | 3      | 600.9767  | 2.8e+6 |

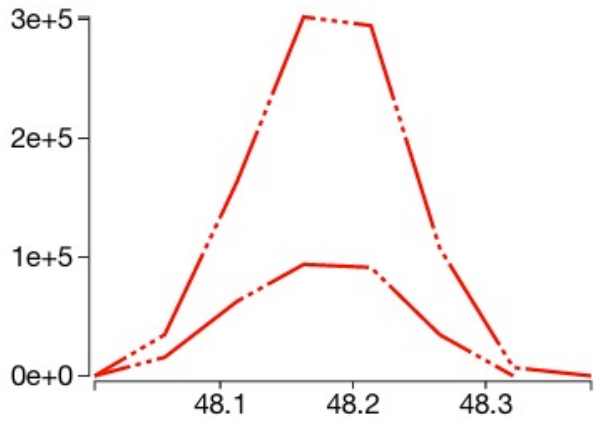

No MS2 for Prop-labeling detected.

# H3.1\_K27-R40: PIC-KS<sup>o</sup>APATGGVKKPHR MS/MS

y13<sup>++</sup> - H3PO4

**Experimental spectrum**

scan 9167  
 retention time 48.3min  
 precursor m/z 600.9758  
 precursor charge 3+

**Theoretical**

M H<sup>3+</sup> 600.9767  
 MH Δ<sub>mass</sub> Da -0.0027  
 MH Δ<sub>mass</sub> ppm -1.5

**edit peptide**

{PIC}K{Propionyl}S{Phospho}APATGGVK{Propionyl}K{Propionyl}PHR

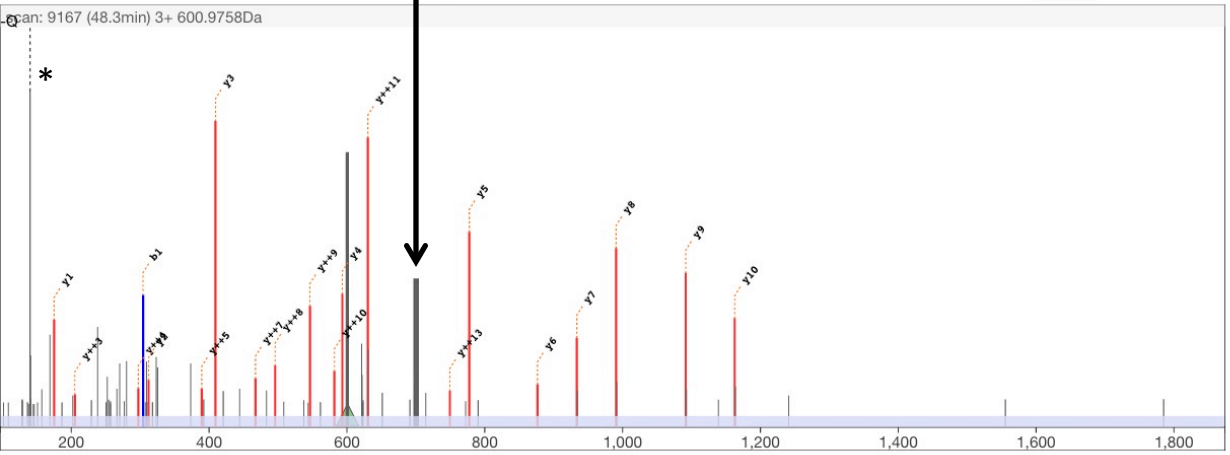

**Anchor**  
 click on peak  
 m/z 749.4084  
 intensity 588  
 int. rank 43

**Current**  
 mouse over peak  
 m/z 700.3926  
 intensity 3208  
 int. rank 7

**Explanation?**  
 delta mass could be...  
 Δ<sub>m/z</sub> -49.01581

**Tune the seq**  
 Align anchor peak

|    | b <sup>++</sup> | b       |           | y       | y <sup>++</sup> |    |
|----|-----------------|---------|-----------|---------|-----------------|----|
|    | 60.53           | 120.04  | PIC       | 1681.88 | 841.44          | 14 |
| 1  | 152.59          | 304.17  | K         | 1497.76 | 749.38          | 13 |
| 2  | 236.09          | 471.16  | S         | 1330.76 | 665.88          | 12 |
| 3  | 271.60          | 542.20  | Phospho   | 1259.72 | 630.36          | 11 |
| 4  | 320.13          | 639.25  | A         | 1162.67 | 581.84          | 10 |
| 5  | 355.65          | 710.29  | P         | 1091.63 | 546.32          | 9  |
| 6  | 406.17          | 811.34  | A         | 990.58  | 495.80          | 8  |
| 7  | 434.68          | 868.36  | T         | 933.56  | 467.29          | 7  |
| 8  | 463.19          | 925.38  | G         | 876.54  | 438.77          | 6  |
| 9  | 512.73          | 1024.45 | V         | 819.52  | 410.25          | 5  |
| 10 | 604.79          | 1208.57 | K         | 777.47  | 389.24          | 5  |
| 11 | 696.85          | 1392.69 | Propionyl | 593.35  | 297.18          | 4  |
| 12 | 745.38          | 1489.75 | Propionyl | 409.23  | 205.12          | 3  |
| 13 | 813.91          | 1626.80 | P         | 312.18  | 156.59          | 2  |
| 14 | 891.96          | 1782.91 | H         | 175.12  | 88.06           | 1  |

\* = 140Da diagnostic ion



# H3.1\_K27-R40:

## KSProp? APATProp? GGVKKPHR

Calculated AUCs for both variations. Only T32-prop MS2 shown.

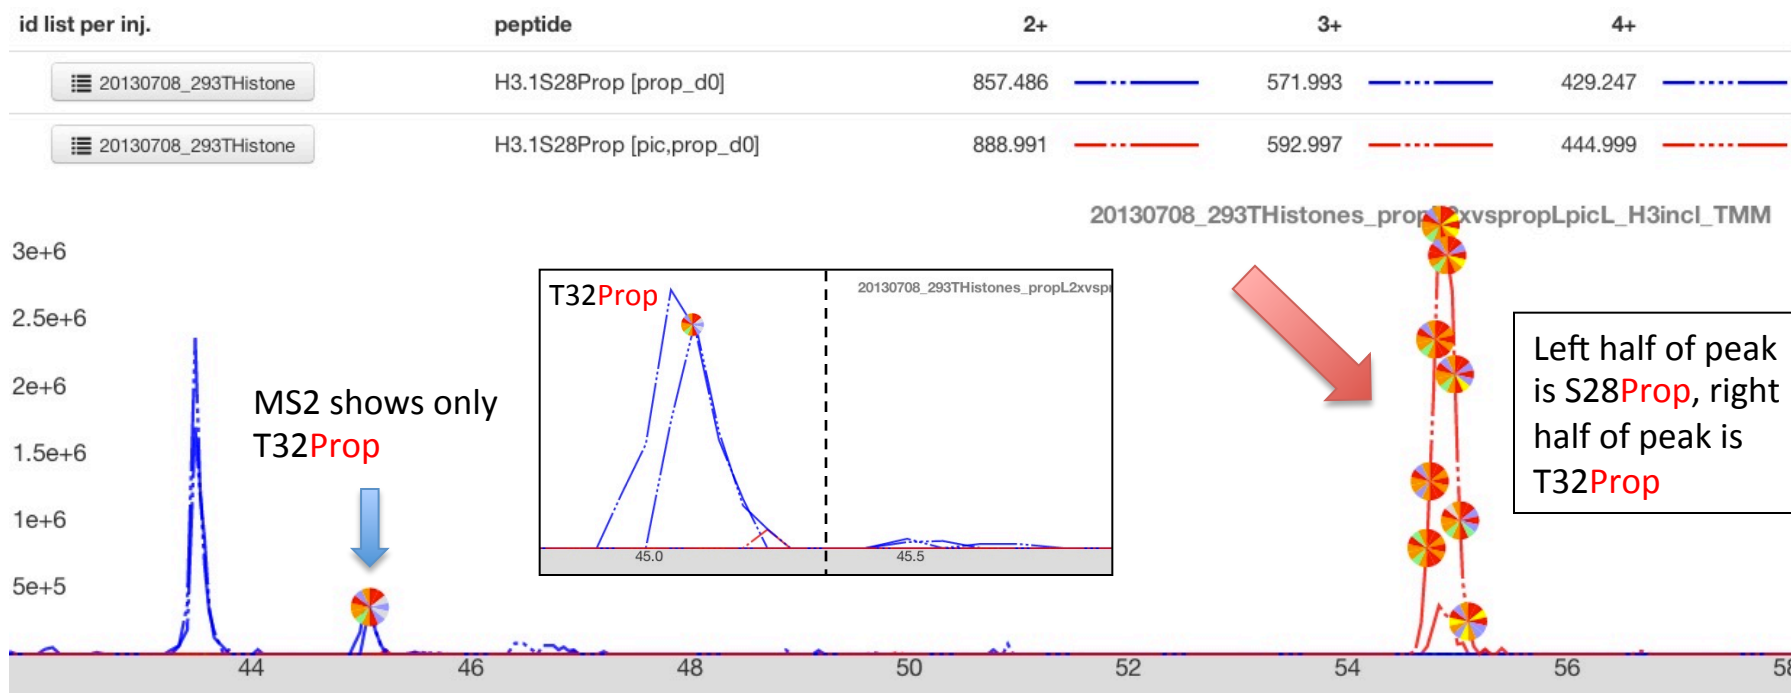

Quanti event: 44.8-45.9min

| injection                                           | peptide                   | charge | m/z      | auc    |
|-----------------------------------------------------|---------------------------|--------|----------|--------|
| 20130708_293THistones_propL2xvspropLpicL_H3incl_TMM | H3.1S28Prop [prop_d0]     | 2      | 857.4860 | 1.7e+6 |
| 20130708_293THistones_propL2xvspropLpicL_H3incl_TMM | H3.1S28Prop [pic,prop_d0] | 2      | 888.9914 | 0.0e+0 |
| 20130708_293THistones_propL2xvspropLpicL_H3incl_TMM | H3.1S28Prop [prop_d0]     | 3      | 571.9931 | 1.2e+6 |
| 20130708_293THistones_propL2xvspropLpicL_H3incl_TMM | H3.1S28Prop [pic,prop_d0] | 3      | 592.9967 | 3.8e+4 |
| 20130708_293THistones_propL2xvspropLpicL_H3incl_TMM | H3.1S28Prop [prop_d0]     | 4      | 429.2466 | 4.4e+4 |
| 20130708_293THistones_propL2xvspropLpicL_H3incl_TMM | H3.1S28Prop [pic,prop_d0] | 4      | 444.9993 | 0.0e+0 |

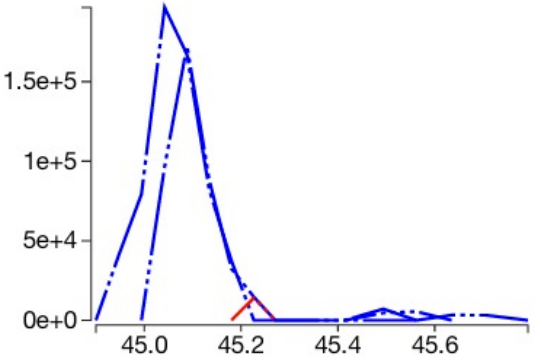

Quanti event: 54.4-55.7min

| injection                                           | peptide                   | charge | m/z      | auc    |
|-----------------------------------------------------|---------------------------|--------|----------|--------|
| 20130708_293THistones_propL2xvspropLpicL_H3incl_TMM | H3.1S28Prop [prop_d0]     | 2      | 857.4860 | 0.0e+0 |
| 20130708_293THistones_propL2xvspropLpicL_H3incl_TMM | H3.1S28Prop [pic,prop_d0] | 2      | 888.9914 | 2.3e+7 |
| 20130708_293THistones_propL2xvspropLpicL_H3incl_TMM | H3.1S28Prop [prop_d0]     | 3      | 571.9931 | 0.0e+0 |
| 20130708_293THistones_propL2xvspropLpicL_H3incl_TMM | H3.1S28Prop [pic,prop_d0] | 3      | 592.9967 | 2.2e+6 |
| 20130708_293THistones_propL2xvspropLpicL_H3incl_TMM | H3.1S28Prop [prop_d0]     | 4      | 429.2466 | 0.0e+0 |
| 20130708_293THistones_propL2xvspropLpicL_H3incl_TMM | H3.1S28Prop [pic,prop_d0] | 4      | 444.9993 | 0.0e+0 |

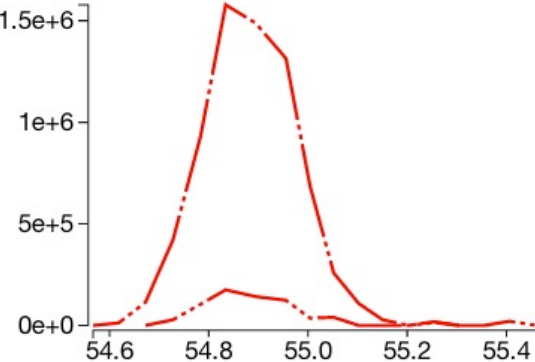

# H3.1\_K27-R40: Prop-KSAPATPropGGVKKPHR MS/MS

### Experimental spectrum

scan 8208  
retention time 45.1min  
precursor m/z 857.4841  
precursor charge 2+

### Theoretical

M H<sup>2+</sup> 857.4860  
MH Δ<sub>mass</sub> Da -0.0036  
MH Δ<sub>mass</sub> ppm -2.1

### edit peptide

{Propionyl}K{Propionyl}SAPAT{Propionyl}GGVK{Propionyl}K{Propionyl}PHR

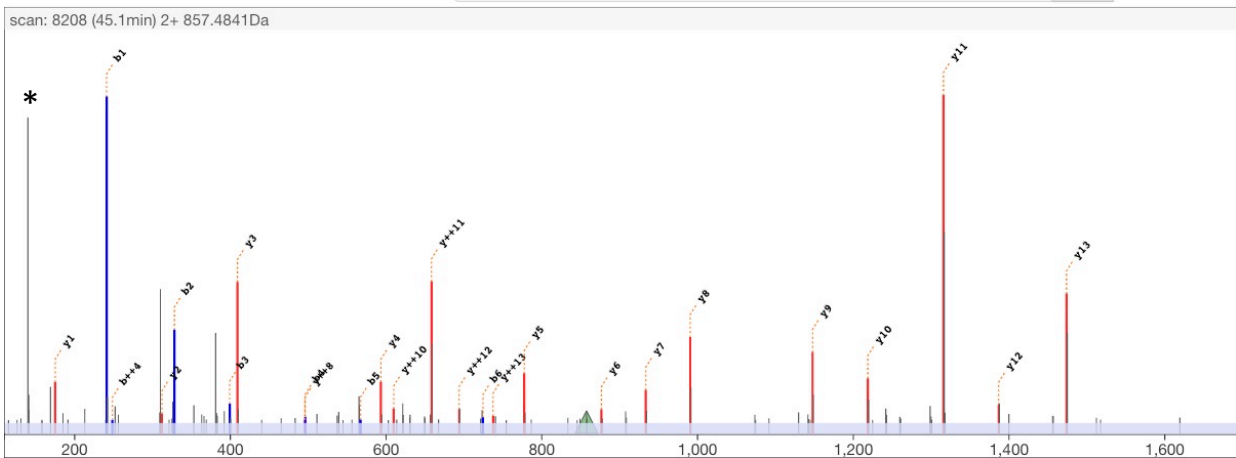

|    | b++    | b       |           | y       | y++    |    |
|----|--------|---------|-----------|---------|--------|----|
|    |        |         | Propionyl | 1657.94 | 829.47 | 14 |
| 1  | 121.08 | 241.15  | K         | 1473.82 | 737.41 | 13 |
|    |        |         | Propionyl |         |        |    |
| 2  | 164.60 | 328.19  | S         | 1386.79 | 693.90 | 12 |
|    |        |         | A         |         |        |    |
| 3  | 200.12 | 399.22  | P         | 1315.75 | 658.38 | 11 |
|    |        |         | A         |         |        |    |
| 4  | 248.64 | 496.28  | T         | 1218.70 | 609.85 | 10 |
|    |        |         | A         |         |        |    |
| 5  | 284.16 | 567.31  | G         | 1147.66 | 574.33 | 9  |
|    |        |         | T         |         |        |    |
| 6  | 362.70 | 724.39  | Propionyl | 990.58  | 495.80 | 8  |
|    |        |         | G         |         |        |    |
| 7  | 391.21 | 781.41  | V         | 933.56  | 467.29 | 7  |
|    |        |         | G         |         |        |    |
| 8  | 419.72 | 838.43  | V         | 876.54  | 438.77 | 6  |
|    |        |         | K         |         |        |    |
| 9  | 469.25 | 937.50  | V         | 777.47  | 389.24 | 5  |
|    |        |         | Propionyl |         |        |    |
| 10 | 561.31 | 1121.62 | K         | 593.35  | 297.18 | 4  |
|    |        |         | Propionyl |         |        |    |
| 11 | 653.37 | 1305.74 | K         | 409.23  | 205.12 | 3  |
|    |        |         | P         |         |        |    |
| 12 | 701.90 | 1402.79 | H         | 312.18  | 156.59 | 2  |
|    |        |         | R         |         |        |    |
| 13 | 770.43 | 1539.85 |           | 175.12  | 88.06  | 1  |
| 14 | 848.48 | 1695.95 |           |         |        |    |

\* = 140Da diagnostic ion

# H3.1\_K27-R40: PIC-KSAPATPropGGVKKPHR MS/MS

### Experimental spectrum

scan 11272  
 retention time 55.0min  
 precursor m/z 888.9897  
 precursor charge 2+

### Theoretical

M H<sup>2+</sup> 888.9914  
 MH Δ<sub>mass</sub> Da -0.0034  
 MH Δ<sub>mass</sub> ppm -1.9

### edit peptide

{PIC}K{Propionyl}SAPAT{Propionyl}GGVK{Propionyl}K{Propionyl}PHR align

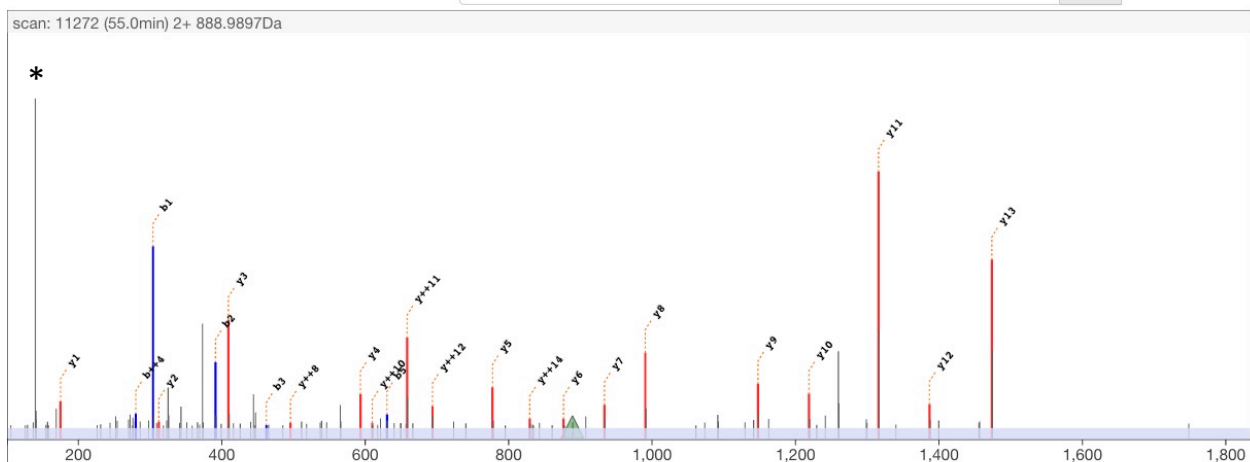

|    | b++    | b       |                | y       | y++    |    |
|----|--------|---------|----------------|---------|--------|----|
|    | 60.53  | 120.04  | PIC            | 1657.94 | 829.47 | 14 |
| 1  | 152.59 | 304.17  | K<br>Propionyl | 1473.82 | 737.41 | 13 |
| 2  | 196.10 | 391.20  | S              | 1386.79 | 693.90 | 12 |
| 3  | 231.62 | 462.23  | A              | 1315.75 | 658.38 | 11 |
| 4  | 280.15 | 559.29  | P              | 1218.70 | 609.85 | 10 |
| 5  | 315.67 | 630.32  | A              | 1147.66 | 574.33 | 9  |
| 6  | 394.20 | 787.40  | T<br>Propionyl | 990.58  | 495.80 | 8  |
| 7  | 422.71 | 844.42  | G              | 933.56  | 467.29 | 7  |
| 8  | 451.22 | 901.44  | V              | 876.54  | 438.77 | 6  |
| 9  | 500.76 | 1000.51 | K              | 777.47  | 389.24 | 5  |
| 10 | 592.82 | 1184.63 | K<br>Propionyl | 593.35  | 297.18 | 4  |
| 11 | 684.88 | 1368.75 | K              | 409.23  | 205.12 | 3  |
| 12 | 733.41 | 1465.80 | P              | 312.18  | 156.59 | 2  |
| 13 | 801.94 | 1602.86 | H              | 175.12  | 88.06  | 1  |
| 14 | 879.99 | 1758.96 | R              |         |        |    |

\* = 140Da diagnostic ion

# H3.1\_K27-R40:

## KMe1SAPATGGVKKPHR

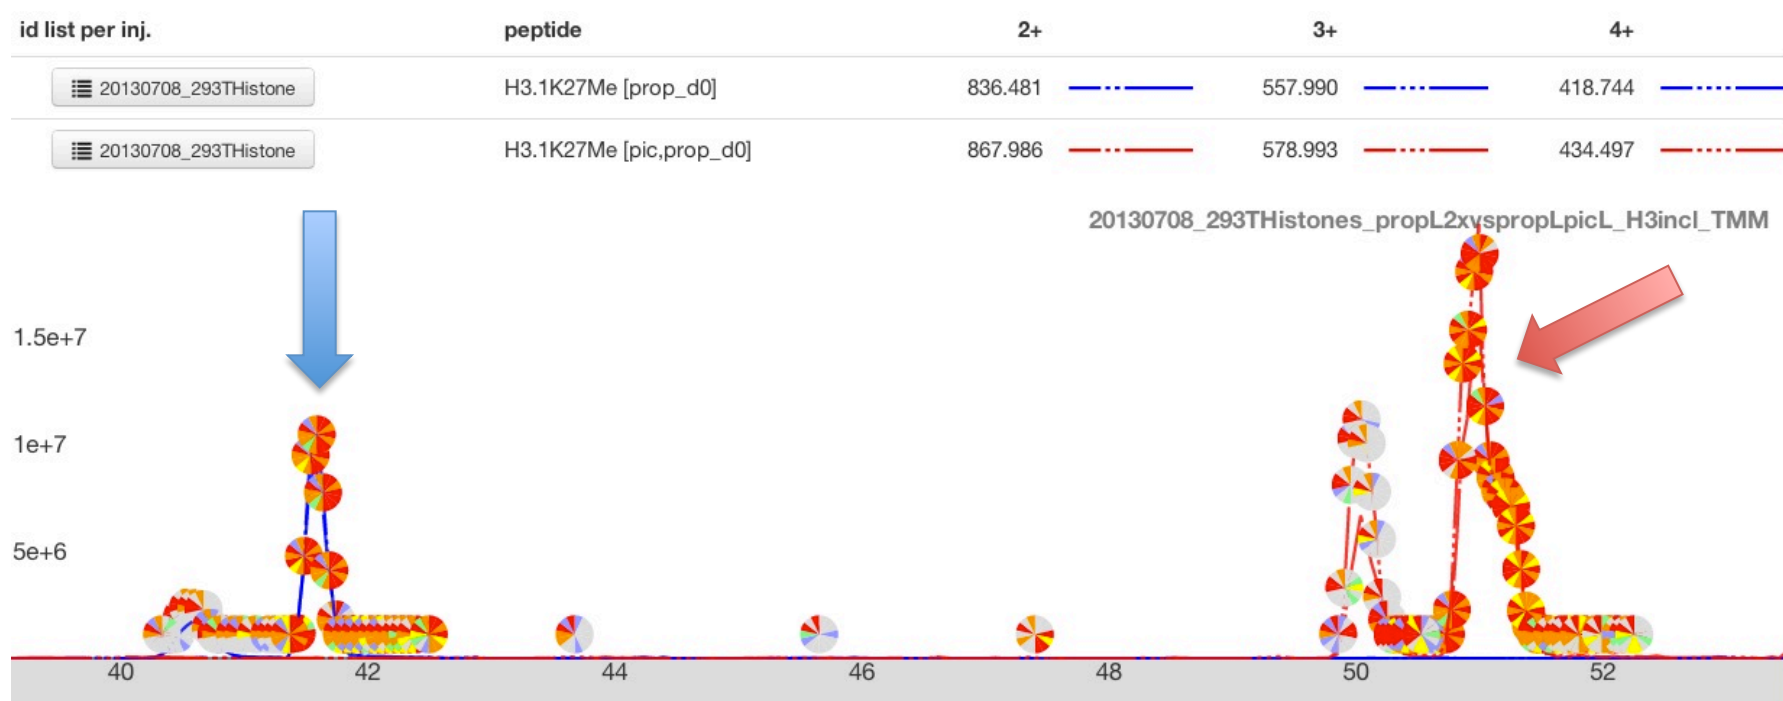

## Quanti event: 41.3-42.5min

| injection                                           | peptide                 | charge | m/z      | auc    |
|-----------------------------------------------------|-------------------------|--------|----------|--------|
| 20130708_293THistones_propL2xvspropLpicL_H3incl_TMM | H3.1K27Me [prop_d0]     | 2      | 836.4807 | 1.3e+8 |
| 20130708_293THistones_propL2xvspropLpicL_H3incl_TMM | H3.1K27Me [pic,prop_d0] | 2      | 867.9861 | 0.0e+0 |
| 20130708_293THistones_propL2xvspropLpicL_H3incl_TMM | H3.1K27Me [prop_d0]     | 3      | 557.9895 | 1.2e+8 |
| 20130708_293THistones_propL2xvspropLpicL_H3incl_TMM | H3.1K27Me [pic,prop_d0] | 3      | 578.9932 | 6.8e+5 |
| 20130708_293THistones_propL2xvspropLpicL_H3incl_TMM | H3.1K27Me [prop_d0]     | 4      | 418.7440 | 0.0e+0 |
| 20130708_293THistones_propL2xvspropLpicL_H3incl_TMM | H3.1K27Me [pic,prop_d0] | 4      | 434.4967 | 0.0e+0 |

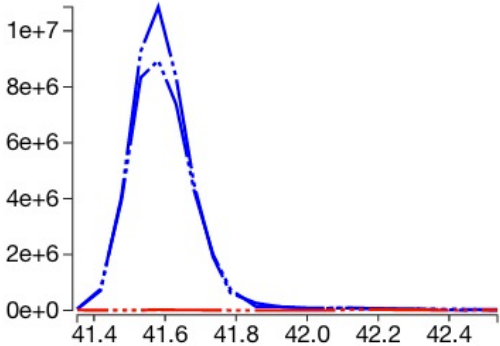

## Quanti event: 50.7-52.4min

| injection                                           | peptide                 | charge | m/z      | auc    |
|-----------------------------------------------------|-------------------------|--------|----------|--------|
| 20130708_293THistones_propL2xvspropLpicL_H3incl_TMM | H3.1K27Me [prop_d0]     | 2      | 836.4807 | 0.0e+0 |
| 20130708_293THistones_propL2xvspropLpicL_H3incl_TMM | H3.1K27Me [pic,prop_d0] | 2      | 867.9861 | 3.3e+8 |
| 20130708_293THistones_propL2xvspropLpicL_H3incl_TMM | H3.1K27Me [prop_d0]     | 3      | 557.9895 | 1.0e+5 |
| 20130708_293THistones_propL2xvspropLpicL_H3incl_TMM | H3.1K27Me [pic,prop_d0] | 3      | 578.9932 | 3.9e+8 |
| 20130708_293THistones_propL2xvspropLpicL_H3incl_TMM | H3.1K27Me [prop_d0]     | 4      | 418.7440 | 0.0e+0 |
| 20130708_293THistones_propL2xvspropLpicL_H3incl_TMM | H3.1K27Me [pic,prop_d0] | 4      | 434.4967 | 0.0e+0 |

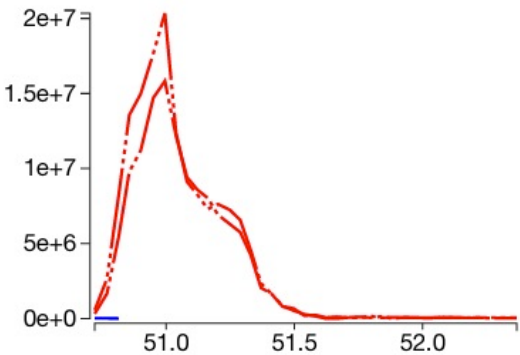

# H3.1\_K27-R40: Prop-KMe1SAPATGGVKKPHR MS/MS

### Experimental spectrum

scan 7138  
 retention time 41.6min  
 precursor m/z 836.4805  
 precursor charge 2+

### Theoretical

M H<sup>2+</sup> 836.4807  
 MH Δ<sub>mass</sub> Da -0.0003  
 MH Δ<sub>mass</sub> Ppm -0.2

### edit peptide

{Propionyl}K(Methyl,Propionyl)SAPATGGVK{Propionyl}K{Propionyl}PHR align

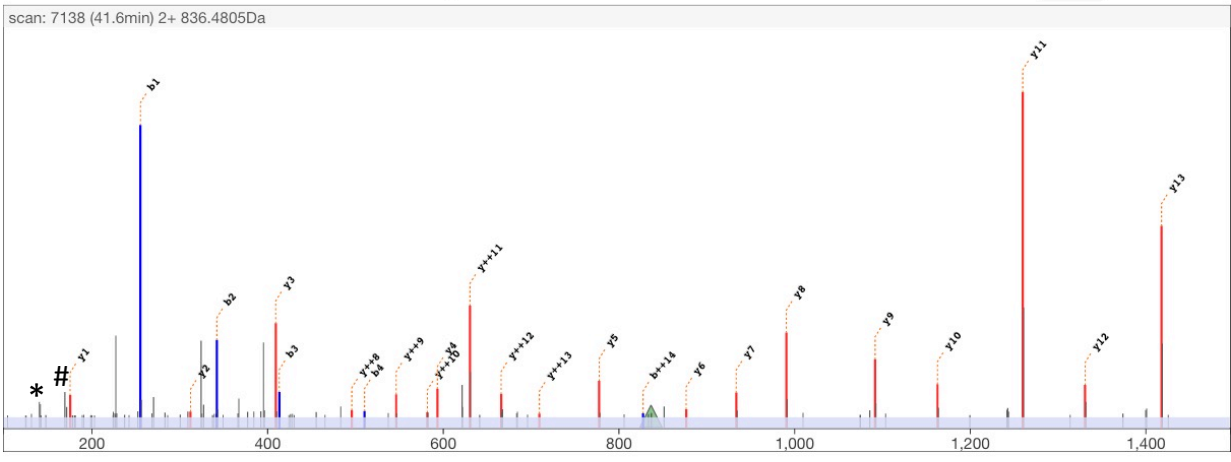

|    | b++    | b       |                   | y       | y++    |    |
|----|--------|---------|-------------------|---------|--------|----|
|    |        |         | Propionyl         | 1615.93 | 808.47 | 14 |
| 1  | 128.09 | 255.17  | K                 | 1417.79 | 709.40 | 13 |
|    |        |         | Methyl(Propionyl) |         |        |    |
| 2  | 171.60 | 342.20  | S                 | 1330.76 | 665.88 | 12 |
| 3  | 207.12 | 413.24  | A                 | 1259.72 | 630.36 | 11 |
| 4  | 255.65 | 510.29  | P                 | 1162.67 | 581.84 | 10 |
| 5  | 291.17 | 581.33  | A                 | 1091.63 | 546.32 | 9  |
| 6  | 341.69 | 682.38  | T                 | 990.58  | 495.80 | 8  |
| 7  | 370.20 | 739.40  | G                 | 933.56  | 467.29 | 7  |
| 8  | 398.71 | 796.42  | V                 | 876.54  | 438.77 | 6  |
| 9  | 448.25 | 895.49  | K                 | 777.47  | 389.24 | 5  |
| 10 | 540.31 | 1079.61 | Propionyl         | 593.35  | 297.18 | 4  |
| 11 | 632.37 | 1263.73 | K                 | 409.23  | 205.12 | 3  |
| 12 | 680.90 | 1360.78 | P                 | 312.18  | 156.59 | 2  |
| 13 | 749.42 | 1497.84 | H                 | 175.12  | 88.06  | 1  |
| 14 | 827.48 | 1653.94 | R                 |         |        |    |

\* = 140Da diagnostic ion  
 # = 171Da diagnostic ion

# H3.1\_K27-R40: PIC-KMe1SAPATGGVKKPHR MS/MS

**Experimental spectrum**

scan 10066  
 retention time 51.1min  
 precursor m/z 867.9841  
 precursor charge 2+

**Theoretical**

M H<sup>2+</sup> 867.9861  
 MH Δ<sub>mass</sub> Da -0.0041  
 MH Δ<sub>mass</sub> ppm -2.4

**edit peptide**

{PIC}K(Methyl,Propionyl)SAPATGGVK(Propionyl)K(Propionyl)PHR align

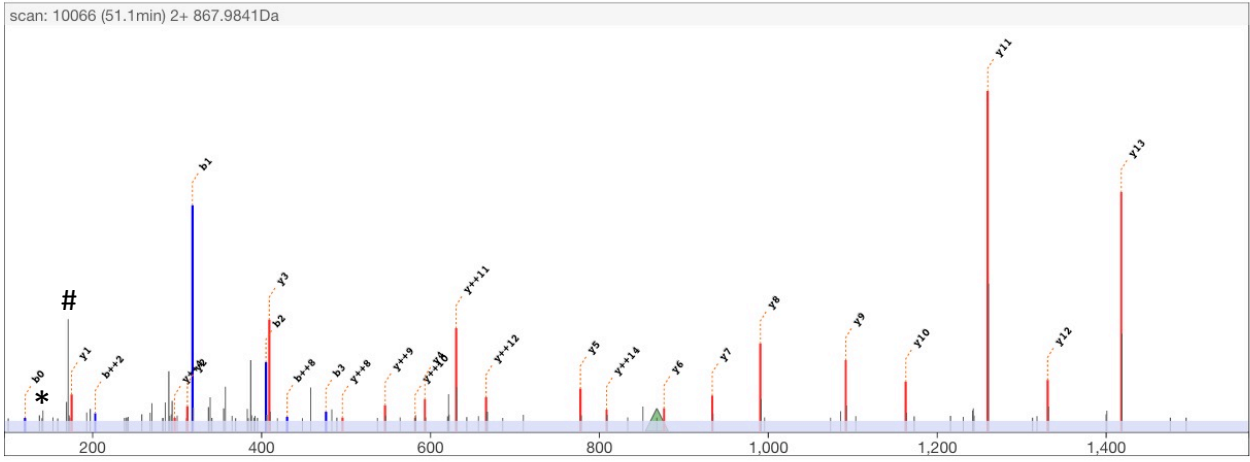

|    | b++    | b       |                    | y       | y++    |    |
|----|--------|---------|--------------------|---------|--------|----|
|    | 60.53  | 120.04  | PIC                | 1615.93 | 808.47 | 14 |
| 1  | 159.59 | 318.18  | Methyl/Propionyl K | 1417.79 | 709.40 | 13 |
| 2  | 203.11 | 405.21  | S                  | 1330.76 | 665.88 | 12 |
| 3  | 238.63 | 476.25  | A                  | 1259.72 | 630.36 | 11 |
| 4  | 287.16 | 573.30  | P                  | 1162.67 | 581.84 | 10 |
| 5  | 322.67 | 644.34  | A                  | 1091.63 | 546.32 | 9  |
| 6  | 373.20 | 745.39  | T                  | 990.58  | 495.80 | 8  |
| 7  | 401.71 | 802.41  | G                  | 933.56  | 467.29 | 7  |
| 8  | 430.22 | 859.43  | V                  | 876.54  | 438.77 | 6  |
| 9  | 479.75 | 958.50  | K                  | 777.47  | 389.24 | 5  |
| 10 | 571.81 | 1142.62 | Propionyl K        | 593.35  | 297.18 | 4  |
| 11 | 663.87 | 1326.74 | Propionyl K        | 409.23  | 205.12 | 3  |
| 12 | 712.40 | 1423.79 | P                  | 312.18  | 156.59 | 2  |
| 13 | 780.93 | 1560.85 | H                  | 175.12  | 88.06  | 1  |
| 14 | 858.98 | 1716.95 | R                  |         |        |    |

\* = 140Da diagnostic ion  
 # = 171Da diagnostic ion



# H3.1\_K27-R40:

KMe1SProp?APATProp?GGVKKPHR

Calculated AUCs for both variations, MS2 for S28-Prop shown.

| id list per inj.     | peptide                        | 2+      | 3+      | 4+      |
|----------------------|--------------------------------|---------|---------|---------|
| 20130708_293THistone | H3.1K27MeS28Prop [prop_d0]     | 864.494 | 576.665 | 432.751 |
| 20130708_293THistone | H3.1K27MeS28Prop [pic,prop_d0] | 895.999 | 597.669 | 448.503 |

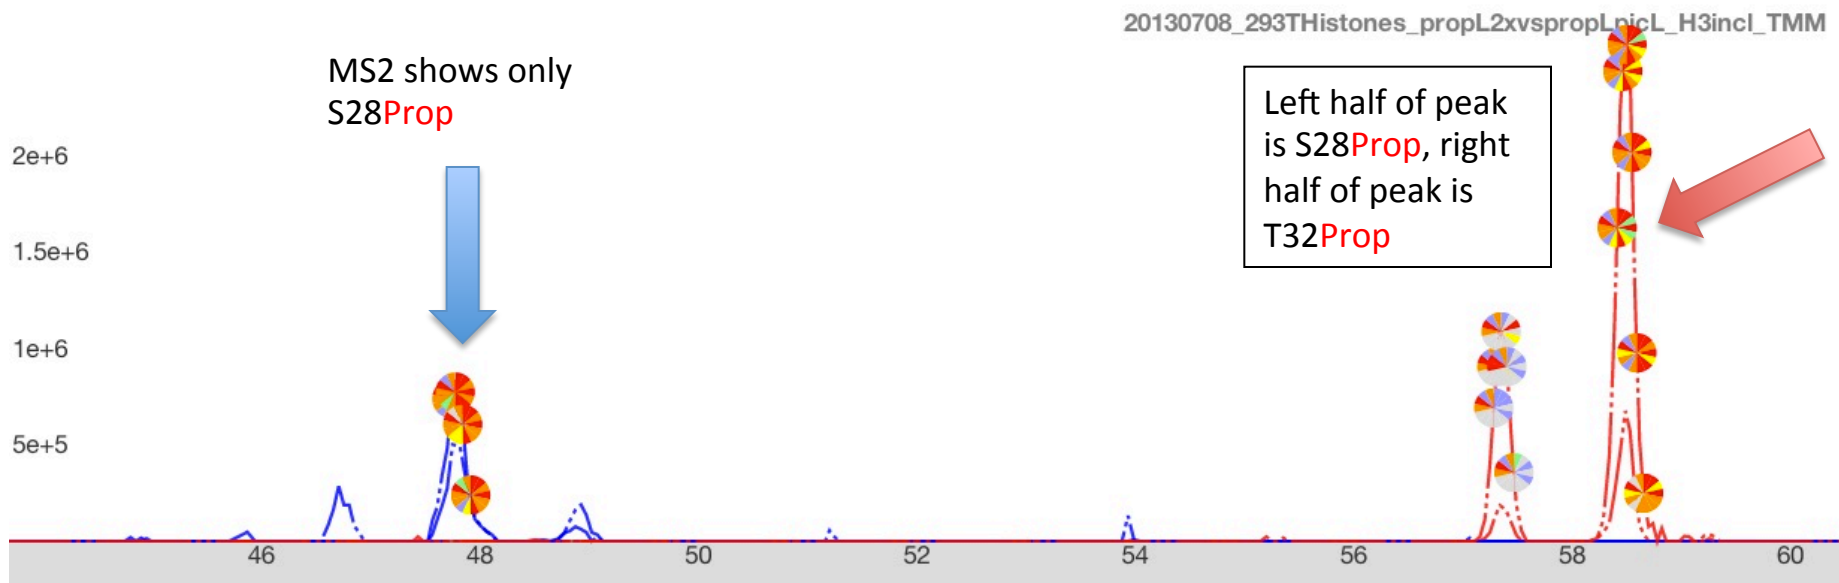

**Quanti event: 47.5-48.2min**

| injection                                           | peptide                        | charge | m/z      | auc    |
|-----------------------------------------------------|--------------------------------|--------|----------|--------|
| 20130708_293THistones_propL2xvspropLpicL_H3incl_TMM | H3.1K27MeS28Prop [prop_d0]     | 2      | 864.4938 | 1.1e+7 |
| 20130708_293THistones_propL2xvspropLpicL_H3incl_TMM | H3.1K27MeS28Prop [pic,prop_d0] | 2      | 895.9992 | 0.0e+0 |
| 20130708_293THistones_propL2xvspropLpicL_H3incl_TMM | H3.1K27MeS28Prop [prop_d0]     | 3      | 576.6649 | 7.5e+6 |
| 20130708_293THistones_propL2xvspropLpicL_H3incl_TMM | H3.1K27MeS28Prop [pic,prop_d0] | 3      | 597.6686 | 0.0e+0 |
| 20130708_293THistones_propL2xvspropLpicL_H3incl_TMM | H3.1K27MeS28Prop [prop_d0]     | 4      | 432.7505 | 0.0e+0 |
| 20130708_293THistones_propL2xvspropLpicL_H3incl_TMM | H3.1K27MeS28Prop [pic,prop_d0] | 4      | 448.5033 | 0.0e+0 |

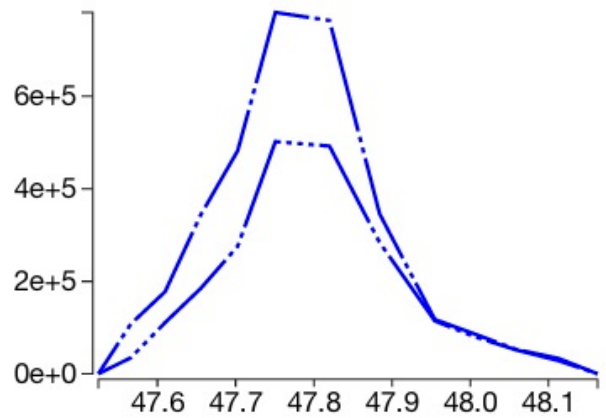

**Quanti event: 58.1-58.9min**

| injection                                           | peptide                        | charge | m/z      | auc    |
|-----------------------------------------------------|--------------------------------|--------|----------|--------|
| 20130708_293THistones_propL2xvspropLpicL_H3incl_TMM | H3.1K27MeS28Prop [prop_d0]     | 2      | 864.4938 | 0.0e+0 |
| 20130708_293THistones_propL2xvspropLpicL_H3incl_TMM | H3.1K27MeS28Prop [pic,prop_d0] | 2      | 895.9992 | 3.1e+7 |
| 20130708_293THistones_propL2xvspropLpicL_H3incl_TMM | H3.1K27MeS28Prop [prop_d0]     | 3      | 576.6649 | 0.0e+0 |
| 20130708_293THistones_propL2xvspropLpicL_H3incl_TMM | H3.1K27MeS28Prop [pic,prop_d0] | 3      | 597.6686 | 6.9e+6 |
| 20130708_293THistones_propL2xvspropLpicL_H3incl_TMM | H3.1K27MeS28Prop [prop_d0]     | 4      | 432.7505 | 0.0e+0 |
| 20130708_293THistones_propL2xvspropLpicL_H3incl_TMM | H3.1K27MeS28Prop [pic,prop_d0] | 4      | 448.5033 | 0.0e+0 |

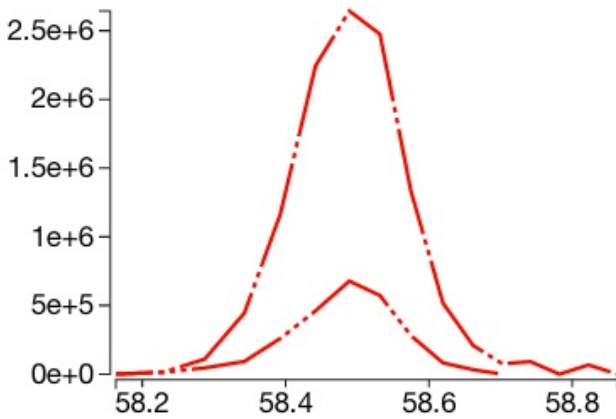

# H3.1\_K27-R40: Prop-KMe1SPropAPATGGVKKPHR MS/MS

### Experimental spectrum

scan 9023  
 retention time 47.7min  
 precursor m/z 864.4913  
 precursor charge 2+

### Theoretical

M H<sup>2+</sup> 864.4938  
 MH Δ<sub>mass</sub> Da -0.0049  
 MH Δ<sub>mass</sub> ppm -2.8

### edit peptide

{Propionyl}K(Methyl,Propionyl)S{Propionyl}APATGGVK{Propionyl}K{Propionyl}PHF align

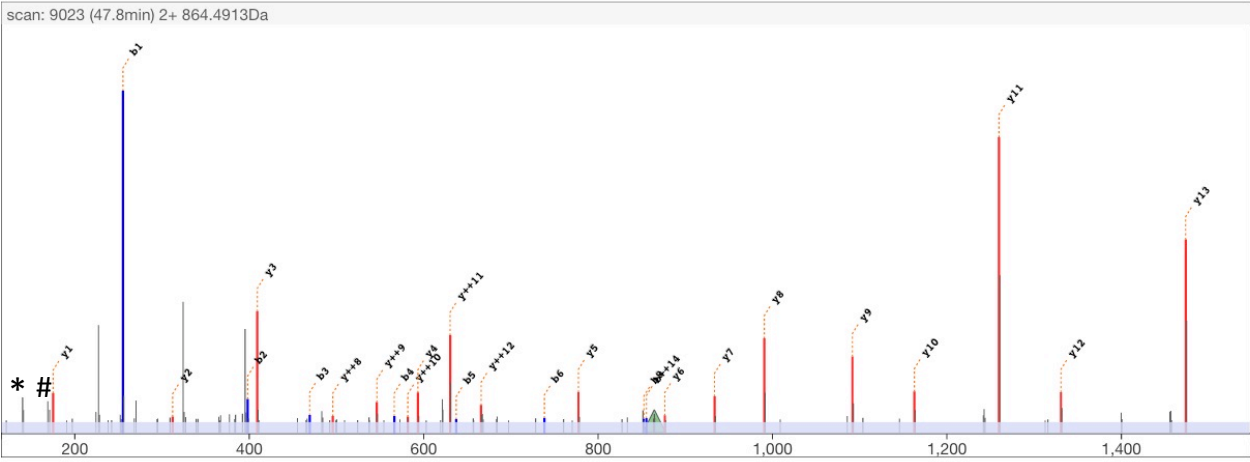

|    | b++    | b       |                  | y       | y++    |    |
|----|--------|---------|------------------|---------|--------|----|
|    |        |         | Propionyl        | 1671.95 | 836.48 | 14 |
| 1  | 128.09 | 255.17  | K                | 1473.82 | 737.41 | 13 |
|    |        |         | Methyl,Propionyl |         |        |    |
| 2  | 199.62 | 398.23  | S                | 1330.76 | 665.88 | 12 |
| 3  | 235.14 | 469.27  | A                | 1259.72 | 630.36 | 11 |
| 4  | 283.66 | 566.32  | P                | 1162.67 | 581.84 | 10 |
| 5  | 319.18 | 637.36  | A                | 1091.63 | 546.32 | 9  |
| 6  | 369.71 | 738.40  | T                | 990.58  | 495.80 | 8  |
| 7  | 398.22 | 795.42  | G                | 933.56  | 467.29 | 7  |
| 8  | 426.73 | 852.45  | V                | 876.54  | 438.77 | 6  |
| 9  | 476.26 | 951.51  | K                | 777.47  | 389.24 | 5  |
| 10 | 568.32 | 1135.64 | Propionyl        | 593.35  | 297.18 | 4  |
| 11 | 660.38 | 1319.76 | K                | 409.23  | 205.12 | 3  |
| 12 | 708.91 | 1416.81 | P                | 312.18  | 156.59 | 2  |
| 13 | 777.44 | 1553.87 | H                | 175.12  | 88.06  | 1  |
| 14 | 855.49 | 1709.97 | R                |         |        |    |

\* = 140Da diagnostic ion  
 # = 171Da diagnostic ion

**Experimental spectrum**

scan 12408  
 retention time 58.6min  
 precursor m/z 895.9982  
 precursor charge 2+

**Theoretical**

M H<sup>2+</sup> 895.9992  
 MH Δ<sub>mass</sub> Da -0.0020  
 MH Δ<sub>mass</sub> ppm -1.1

**edit peptide**

{PIC}[K][Methyl,Propionyl]S[Propionyl]APATGGVK{Propionyl}K{Propionyl}PHR align

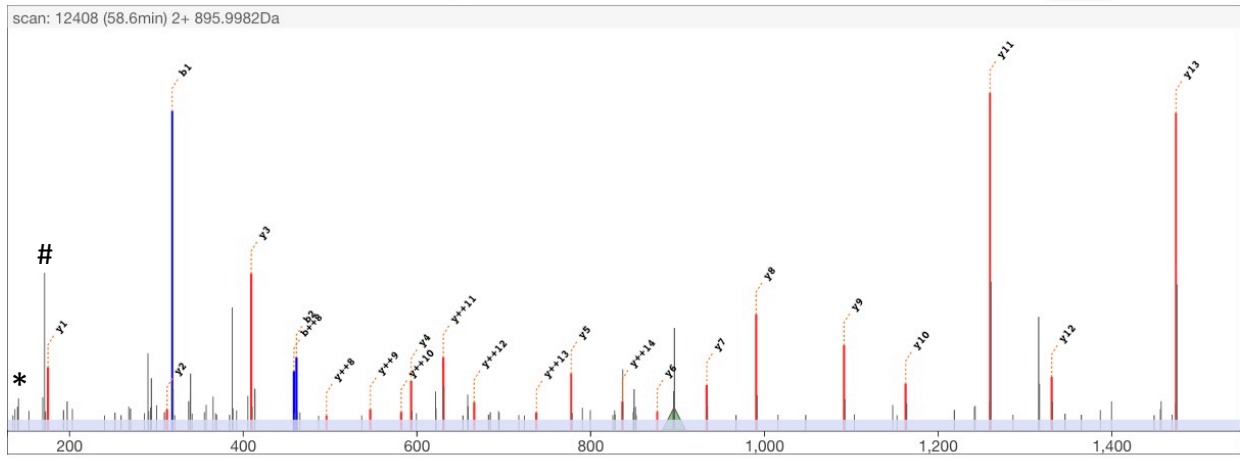

|    | b++    | b       |                  | y       | y++    |    |
|----|--------|---------|------------------|---------|--------|----|
|    | 60.53  | 120.04  | PIC              | 1671.95 | 836.48 | 14 |
| 1  | 159.59 | 318.18  | K                | 1473.82 | 737.41 | 13 |
| 2  | 231.12 | 461.24  | Methyl,Propionyl | 1330.76 | 665.88 | 12 |
| 3  | 266.64 | 532.28  | S                | 1259.72 | 630.36 | 11 |
| 4  | 315.17 | 629.33  | A                | 1162.67 | 581.84 | 10 |
| 5  | 350.69 | 700.37  | P                | 1091.63 | 546.32 | 9  |
| 6  | 401.21 | 801.41  | A                | 990.58  | 495.80 | 8  |
| 7  | 429.72 | 858.44  | T                | 933.56  | 467.29 | 7  |
| 8  | 458.23 | 915.46  | G                | 876.54  | 438.77 | 6  |
| 9  | 507.77 | 1014.53 | V                | 777.47  | 389.24 | 5  |
| 10 | 599.83 | 1198.65 | K                | 593.35  | 297.18 | 4  |
| 11 | 691.89 | 1382.77 | Propionyl        | 409.23  | 205.12 | 3  |
| 12 | 740.41 | 1479.82 | K                | 312.18  | 156.59 | 2  |
| 13 | 808.94 | 1616.88 | P                | 175.12  | 88.06  | 1  |
| 14 | 886.99 | 1772.98 | H                |         |        |    |
|    |        |         | R                |         |        |    |

\* = 140Da diagnostic ion  
 # = 171Da diagnostic ion

# H3.1\_K27-R40:

## KMe2SAPATGGVKKPHR

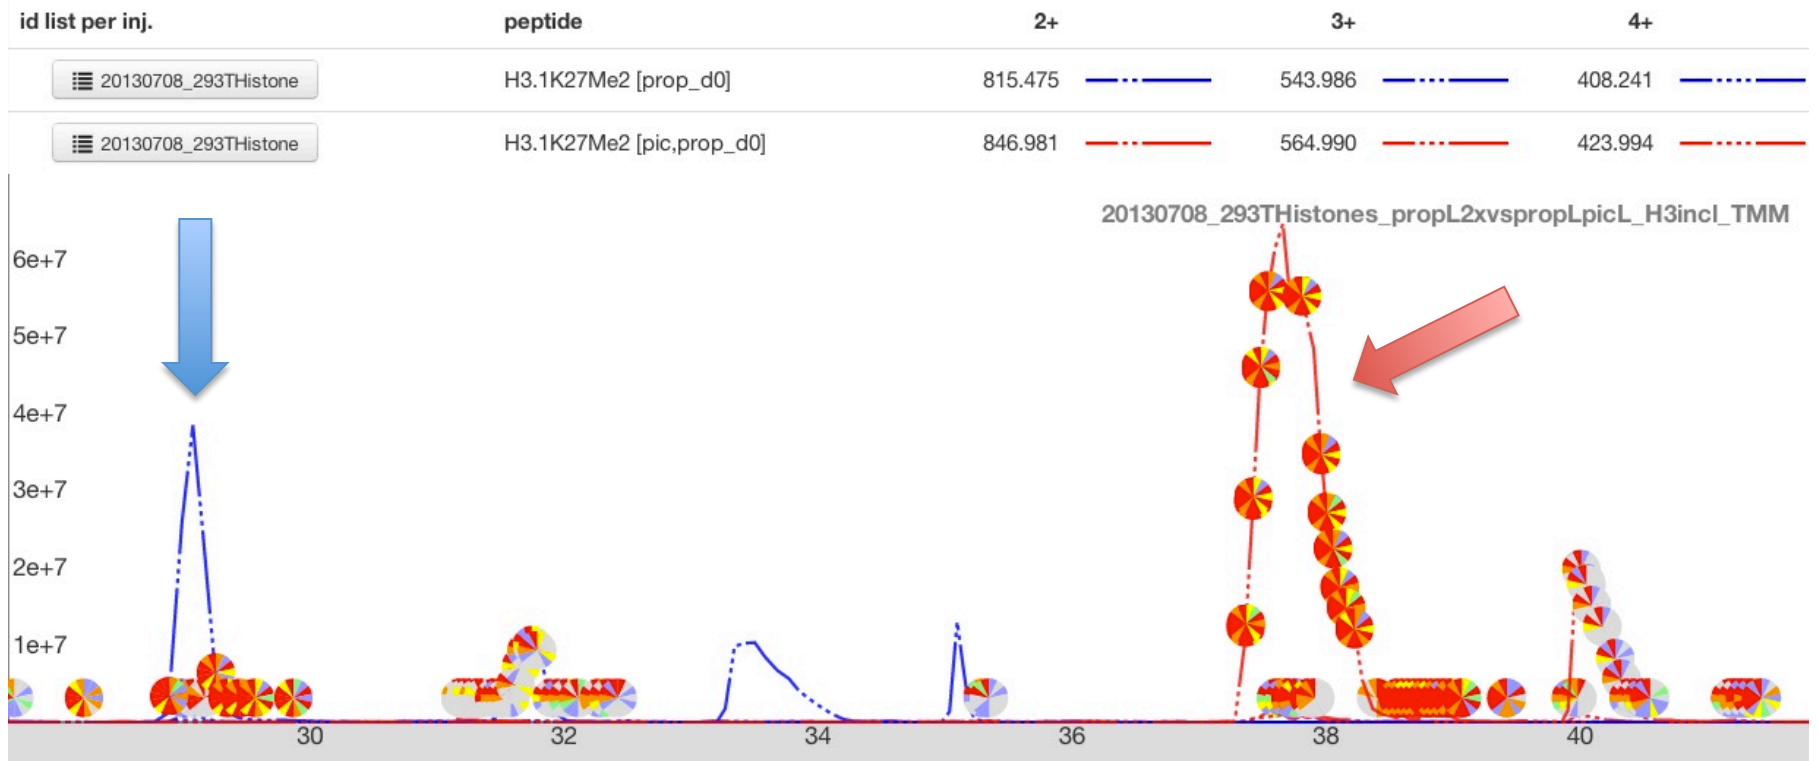

### Quanti event: 28.7-30.2min

| injection                                           | peptide                  | charge | m/z      | auc    |
|-----------------------------------------------------|--------------------------|--------|----------|--------|
| 20130708_293THistones_propL2xvspropLpicL_H3incl_TMM | H3.1K27Me2 [prop_d0]     | 2      | 815.4754 | 4.0e+6 |
| 20130708_293THistones_propL2xvspropLpicL_H3incl_TMM | H3.1K27Me2 [pic,prop_d0] | 2      | 846.9808 | 0.0e+0 |
| 20130708_293THistones_propL2xvspropLpicL_H3incl_TMM | H3.1K27Me2 [prop_d0]     | 3      | 543.9860 | 5.3e+8 |
| 20130708_293THistones_propL2xvspropLpicL_H3incl_TMM | H3.1K27Me2 [pic,prop_d0] | 3      | 564.9897 | 5.8e+4 |
| 20130708_293THistones_propL2xvspropLpicL_H3incl_TMM | H3.1K27Me2 [prop_d0]     | 4      | 408.2413 | 1.4e+7 |
| 20130708_293THistones_propL2xvspropLpicL_H3incl_TMM | H3.1K27Me2 [pic,prop_d0] | 4      | 423.9941 | 4.2e+5 |

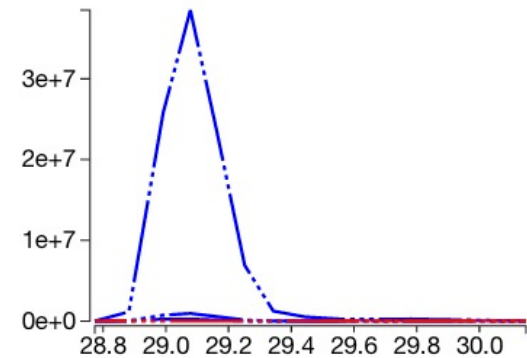

### Quanti event: 37.1-39.2min

| injection                                           | peptide                  | charge | m/z      | auc    |
|-----------------------------------------------------|--------------------------|--------|----------|--------|
| 20130708_293THistones_propL2xvspropLpicL_H3incl_TMM | H3.1K27Me2 [prop_d0]     | 2      | 815.4754 | 0.0e+0 |
| 20130708_293THistones_propL2xvspropLpicL_H3incl_TMM | H3.1K27Me2 [pic,prop_d0] | 2      | 846.9808 | 3.0e+7 |
| 20130708_293THistones_propL2xvspropLpicL_H3incl_TMM | H3.1K27Me2 [prop_d0]     | 3      | 543.9860 | 7.8e+4 |
| 20130708_293THistones_propL2xvspropLpicL_H3incl_TMM | H3.1K27Me2 [pic,prop_d0] | 3      | 564.9897 | 2.2e+9 |
| 20130708_293THistones_propL2xvspropLpicL_H3incl_TMM | H3.1K27Me2 [prop_d0]     | 4      | 408.2413 | 9.8e+4 |
| 20130708_293THistones_propL2xvspropLpicL_H3incl_TMM | H3.1K27Me2 [pic,prop_d0] | 4      | 423.9941 | 3.6e+7 |

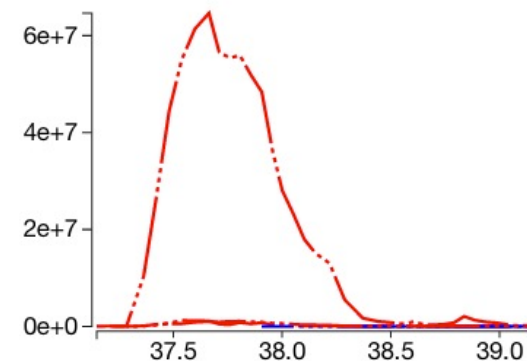

# H3.1\_K27-R40: Prop-KMe2SAPATGGVKKPHR MS/MS

**Experimental spectrum**

scan 3988  
 retention time 28.9min  
 precursor m/z 543.9865  
 precursor charge 3+

**Theoretical**

M H<sup>3+</sup> 543.9860  
 MH Δ<sub>mass</sub> Da 0.0015  
 MH Δ<sub>mass</sub> ppm 0.9

**edit peptide**

{Propionyl}K{Dimethyl}SAPATGGV{K{Propionyl}K{Propionyl}PHR align

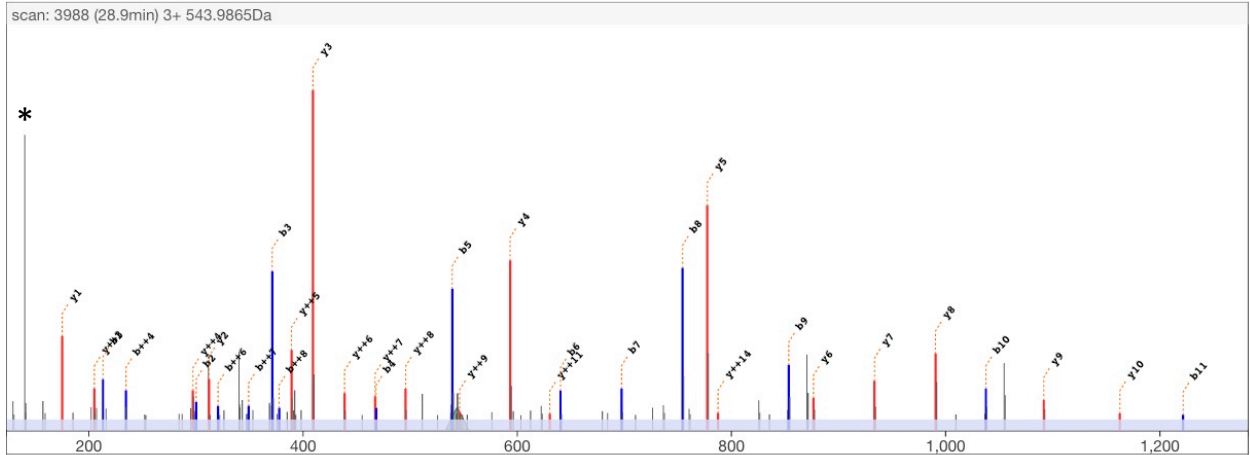

|    | b++    | b       | y       | y++    |    |
|----|--------|---------|---------|--------|----|
|    |        |         | 1573.92 | 787.46 | 14 |
| 1  | 107.08 | 213.16  | 1417.79 | 709.40 | 13 |
| 2  | 150.60 | 300.19  | 1330.76 | 665.88 | 12 |
| 3  | 186.12 | 371.23  | 1259.72 | 630.36 | 11 |
| 4  | 234.64 | 468.28  | 1162.67 | 581.84 | 10 |
| 5  | 270.16 | 539.32  | 1091.63 | 546.32 | 9  |
| 6  | 320.69 | 640.37  | 990.58  | 495.80 | 8  |
| 7  | 349.20 | 697.39  | 933.56  | 467.29 | 7  |
| 8  | 377.71 | 754.41  | 876.54  | 438.77 | 6  |
| 9  | 427.24 | 853.48  | 777.47  | 389.24 | 5  |
| 10 | 519.30 | 1037.60 | 593.35  | 297.18 | 4  |
| 11 | 611.36 | 1221.72 | 409.23  | 205.12 | 3  |
| 12 | 659.89 | 1318.77 | 312.18  | 156.59 | 2  |
| 13 | 728.42 | 1455.83 | 175.12  | 88.06  | 1  |
| 14 | 806.47 | 1611.93 |         |        |    |

\* = 140Da diagnostic ion

# H3.1\_K27-R40: PIC-KMe2SAPATGGVKKPHR MS/MS

### Experimental spectrum

scan 5955  
 retention time 37.5min  
 precursor m/z 564.9888  
 precursor charge 3+

### Theoretical

M H<sup>3+</sup> 564.9897  
 MH Δ<sub>mass</sub> Da -0.0025  
 MH Δ<sub>mass</sub> ppm -1.5

### edit peptide

{PIC}K{Dimethyl}SAPATGGVK{Propionyl}K{Propionyl}PHR

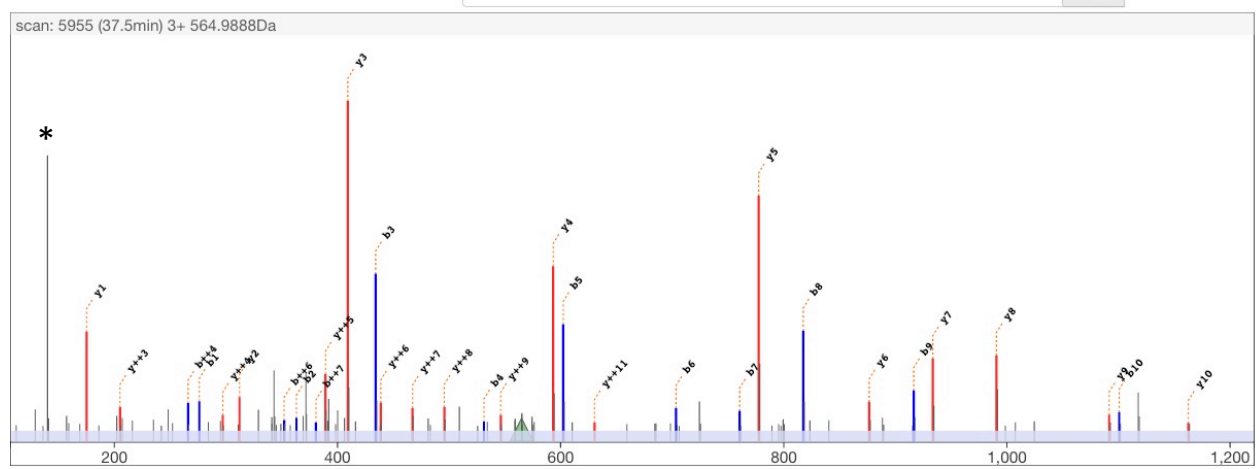

|    | b++    | b       |     | y       | y++    |    |
|----|--------|---------|-----|---------|--------|----|
|    | 60.53  | 120.04  | PIC | 1573.92 | 787.46 | 14 |
| 1  | 138.59 | 276.17  | K   | 1417.79 | 709.40 | 13 |
| 2  | 182.10 | 363.20  | S   | 1330.76 | 665.88 | 12 |
| 3  | 217.62 | 434.24  | A   | 1259.72 | 630.36 | 11 |
| 4  | 266.15 | 531.29  | P   | 1162.67 | 581.84 | 10 |
| 5  | 301.67 | 602.33  | A   | 1091.63 | 546.32 | 9  |
| 6  | 352.19 | 703.38  | T   | 990.58  | 495.80 | 8  |
| 7  | 380.70 | 760.40  | G   | 933.56  | 467.29 | 7  |
| 8  | 409.21 | 817.42  | V   | 876.54  | 438.77 | 6  |
| 9  | 458.75 | 916.49  | K   | 777.47  | 389.24 | 5  |
| 10 | 550.81 | 1100.61 | K   | 593.35  | 297.18 | 4  |
| 11 | 642.87 | 1284.73 | P   | 409.23  | 205.12 | 3  |
| 12 | 691.40 | 1381.78 | H   | 312.18  | 156.59 | 2  |
| 13 | 759.93 | 1518.84 | R   | 175.12  | 88.06  | 1  |
| 14 | 837.98 | 1674.94 |     |         |        |    |

\* = 140Da diagnostic ion



# H3.1\_K27-R40:

KMe2SPoAPATGGVKKPHR

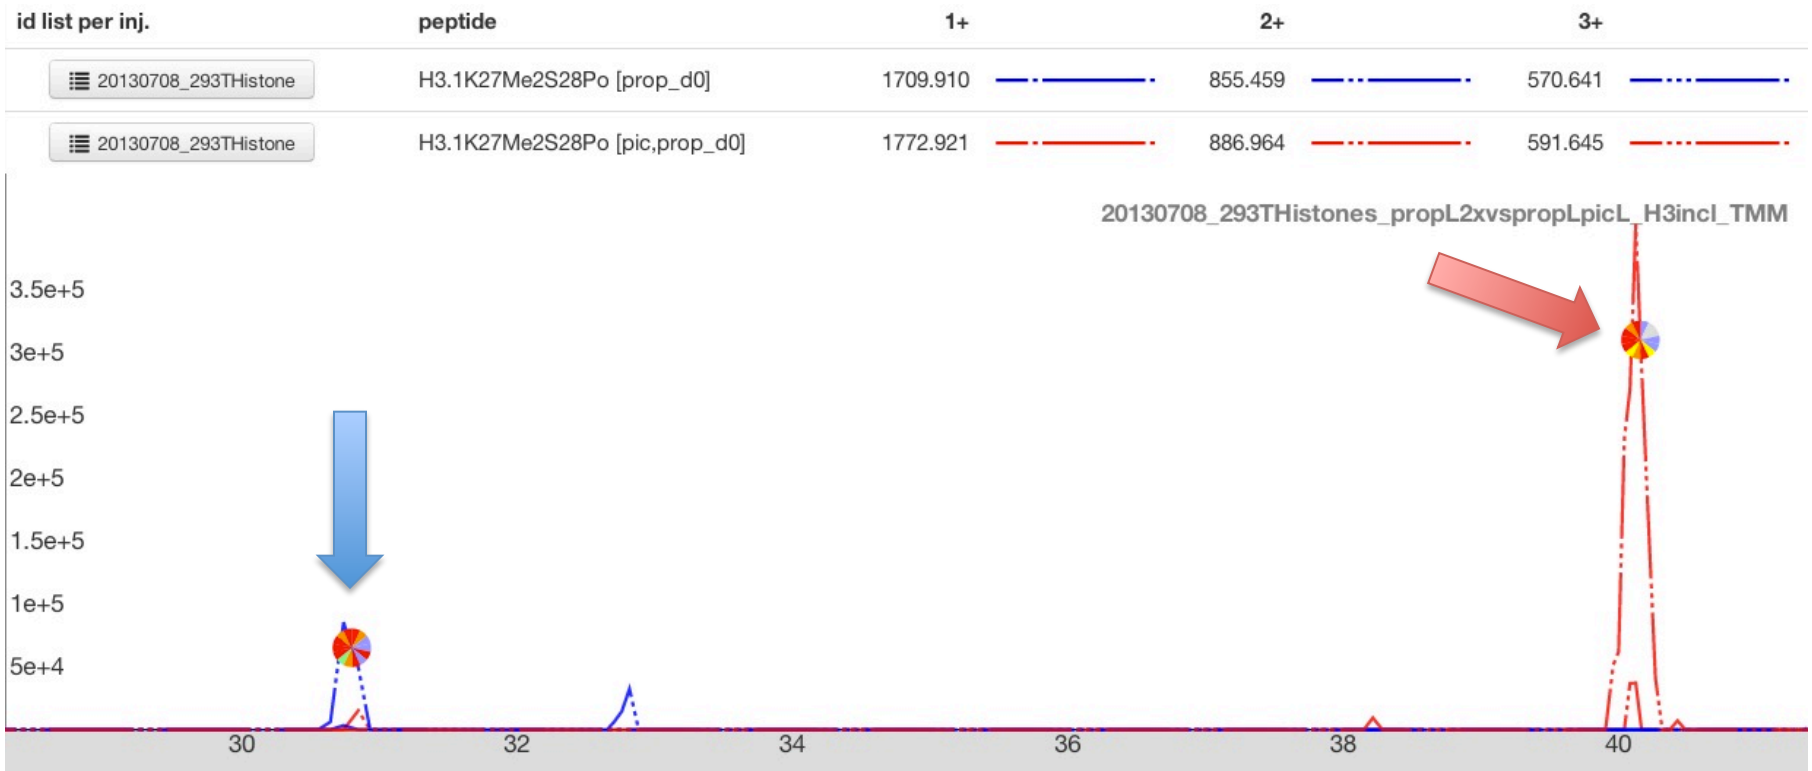

### Quanti event: 29.7-31.4min

x

| injection                                           | peptide                       | charge | m/z       | auc    |
|-----------------------------------------------------|-------------------------------|--------|-----------|--------|
| 20130708_293THistones_propL2xvspropLpicL_H3incl_TMM | H3.1K27Me2S28Po [prop_d0]     | 1      | 1709.9098 | 0.0e+0 |
| 20130708_293THistones_propL2xvspropLpicL_H3incl_TMM | H3.1K27Me2S28Po [pic,prop_d0] | 1      | 1772.9207 | 0.0e+0 |
| 20130708_293THistones_propL2xvspropLpicL_H3incl_TMM | H3.1K27Me2S28Po [prop_d0]     | 2      | 855.4586  | 2.1e+4 |
| 20130708_293THistones_propL2xvspropLpicL_H3incl_TMM | H3.1K27Me2S28Po [pic,prop_d0] | 2      | 886.9640  | 8.8e+4 |
| 20130708_293THistones_propL2xvspropLpicL_H3incl_TMM | H3.1K27Me2S28Po [prop_d0]     | 3      | 570.6415  | 8.4e+5 |
| 20130708_293THistones_propL2xvspropLpicL_H3incl_TMM | H3.1K27Me2S28Po [pic,prop_d0] | 3      | 591.6451  | 0.0e+0 |

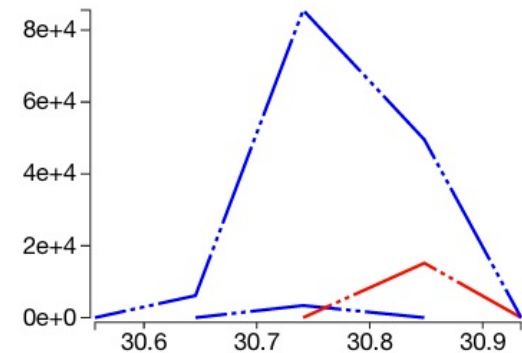

### Quanti event: 39.4-41.0min

x

| injection                                           | peptide                       | charge | m/z       | auc    |
|-----------------------------------------------------|-------------------------------|--------|-----------|--------|
| 20130708_293THistones_propL2xvspropLpicL_H3incl_TMM | H3.1K27Me2S28Po [prop_d0]     | 1      | 1709.9098 | 0.0e+0 |
| 20130708_293THistones_propL2xvspropLpicL_H3incl_TMM | H3.1K27Me2S28Po [pic,prop_d0] | 1      | 1772.9207 | 0.0e+0 |
| 20130708_293THistones_propL2xvspropLpicL_H3incl_TMM | H3.1K27Me2S28Po [prop_d0]     | 2      | 855.4586  | 0.0e+0 |
| 20130708_293THistones_propL2xvspropLpicL_H3incl_TMM | H3.1K27Me2S28Po [pic,prop_d0] | 2      | 886.9640  | 1.9e+5 |
| 20130708_293THistones_propL2xvspropLpicL_H3incl_TMM | H3.1K27Me2S28Po [prop_d0]     | 3      | 570.6415  | 0.0e+0 |
| 20130708_293THistones_propL2xvspropLpicL_H3incl_TMM | H3.1K27Me2S28Po [pic,prop_d0] | 3      | 591.6451  | 4.0e+6 |

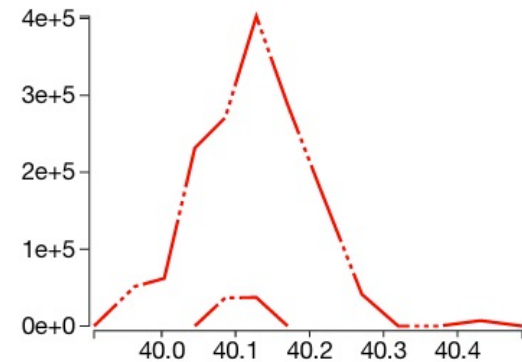

### Experimental spectrum

scan 4317  
 retention time 30.8min  
 precursor m/z 570.6415  
 precursor charge 3+

### Theoretical

M H<sup>3+</sup> 570.6415  
 MH  $\Delta_{mass}$  Da 0.0002  
 MH  $\Delta_{mass}$  ppm 0.1

### edit peptide

{Propionyl}K{Dimethyl}S{Phospho}APATGGVK{Propionyl}K{Propionyl}PHR

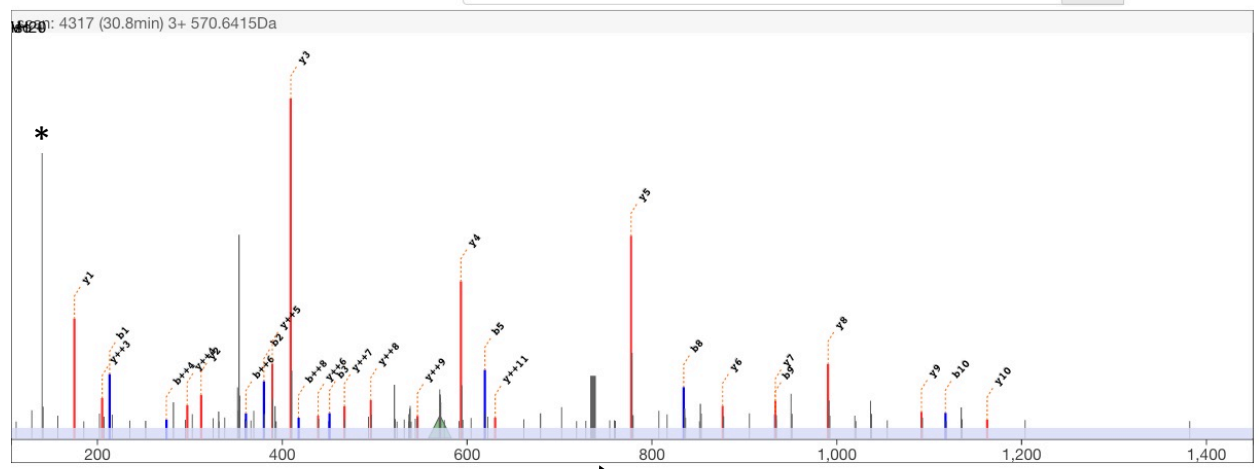

**Anchor**  
 click on peak  
 m/z 834.3704  
 intensity 1323  
 int. rank 13

**Current**  
 mouse over peak  
 m/z 736.3955  
 intensity 1695  
 int. rank 9

**Explanation?**  
 delta mass could be...  
 $\Delta_{m/z}$  -97.97491

**Tune the seq**  
 Align anchor peak

b8 - H3PO4

\* = 140Da diagnostic ion

|    | b++    | b       | y       | y++    |    |
|----|--------|---------|---------|--------|----|
|    |        |         | 1653.88 | 827.45 | 14 |
| 1  | 107.08 | 213.16  | 1497.76 | 749.38 | 13 |
| 2  | 190.58 | 380.16  | 1330.76 | 665.88 | 12 |
| 3  | 226.10 | 451.20  | 1259.72 | 630.36 | 11 |
| 4  | 274.63 | 548.25  | 1162.67 | 581.84 | 10 |
| 5  | 310.15 | 619.29  | 1091.63 | 546.32 | 9  |
| 6  | 360.67 | 720.33  | 990.58  | 495.80 | 8  |
| 7  | 389.18 | 777.35  | 933.56  | 467.29 | 7  |
| 8  | 417.69 | 834.38  | 876.54  | 438.77 | 6  |
| 9  | 467.23 | 933.44  | 777.47  | 389.24 | 5  |
| 10 | 559.29 | 1117.57 | 593.35  | 297.18 | 4  |
| 11 | 651.35 | 1301.69 | 409.23  | 205.12 | 3  |
| 12 | 699.87 | 1398.74 | 312.18  | 156.59 | 2  |
| 13 | 768.40 | 1535.80 | 175.12  | 88.06  | 1  |
| 14 | 846.45 | 1691.90 |         |        |    |

Phospho-loss also on b2 and b5 ions.

# H3.1\_K27-R40: PIC-KMe2SPoAPATGGVKKPHR MS/MS

### Experimental spectrum

scan 6718  
 retention time 40.2min  
 precursor m/z 591.6420  
 precursor charge 3+

### Theoretical

M H<sup>3+</sup> 591.6451  
 MH  $\Delta_{mass}$  Da -0.0092  
 MH  $\Delta_{mass}$  ppm -5.2

### edit peptide

{PIC}K{Dimethyl}S{Phospho}APATGGVK{Propionyl}K{Propionyl}PHR

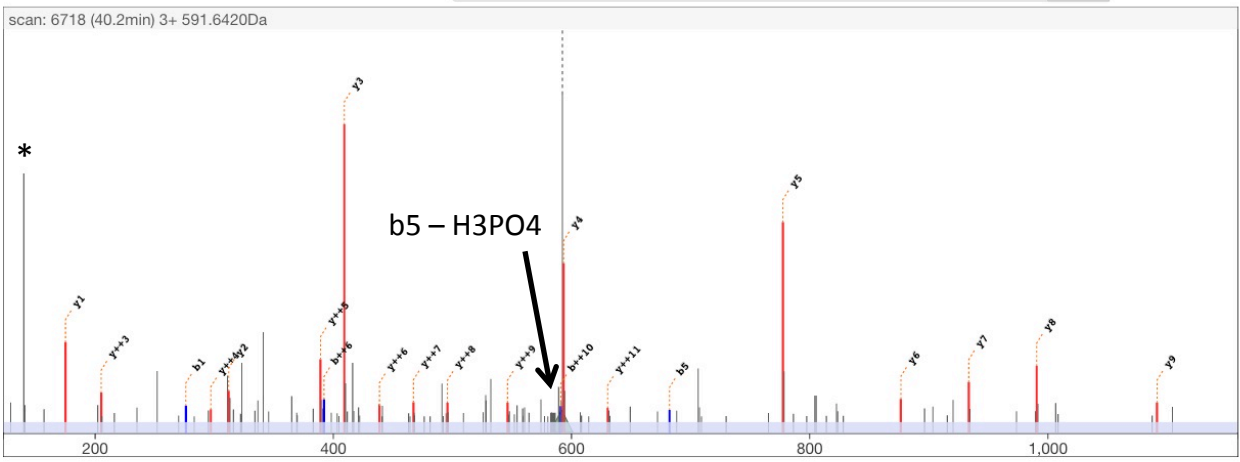

| Anchor               | Current                |
|----------------------|------------------------|
| <i>click on peak</i> | <i>mouse over peak</i> |
| m/z 682.3036         | m/z 584.3321           |
| intensity 1258       | intensity 976          |
| int. rank 63         | int. rank 82           |

**Explanation?**  
 delta mass could be...  
 $\Delta_{m/z}$  -97.97156

**Tune the seq**  
 Align anchor peak

|    | b++    | b       |     | y       | y++    |    |
|----|--------|---------|-----|---------|--------|----|
|    | 60.53  | 120.04  | PIC | 1653.88 | 827.45 | 14 |
| 1  | 138.59 | 276.17  | K   | 1497.76 | 749.38 | 13 |
| 2  | 222.09 | 443.17  | S   | 1330.76 | 665.88 | 12 |
| 3  | 257.61 | 514.21  | A   | 1259.72 | 630.36 | 11 |
| 4  | 306.13 | 611.26  | P   | 1162.67 | 581.84 | 10 |
| 5  | 341.65 | 682.30  | A   | 1091.63 | 546.32 | 9  |
| 6  | 392.18 | 783.34  | T   | 990.58  | 495.80 | 8  |
| 7  | 420.69 | 840.37  | G   | 933.56  | 467.29 | 7  |
| 8  | 449.20 | 897.39  | V   | 876.54  | 438.77 | 6  |
| 9  | 498.73 | 996.46  | K   | 777.47  | 389.24 | 5  |
| 10 | 590.79 | 1180.58 | K   | 593.35  | 297.18 | 4  |
| 11 | 682.85 | 1364.70 | P   | 409.23  | 205.12 | 3  |
| 12 | 731.38 | 1461.75 | H   | 312.18  | 156.59 | 2  |
| 13 | 799.91 | 1598.81 | R   | 175.12  | 88.06  | 1  |
| 14 | 877.96 | 1754.91 |     |         |        |    |

\* = 140Da diagnostic ion

# H3.1\_K27-R40:

KMe2SProp?APATProp?GGVKKPHR

Earlier eluting peak is S28-prop. Double-peak for Prop-labeling and merged peak for PIC-labeling. Combined AUCs for both PTMs. T32-MS2s shown.

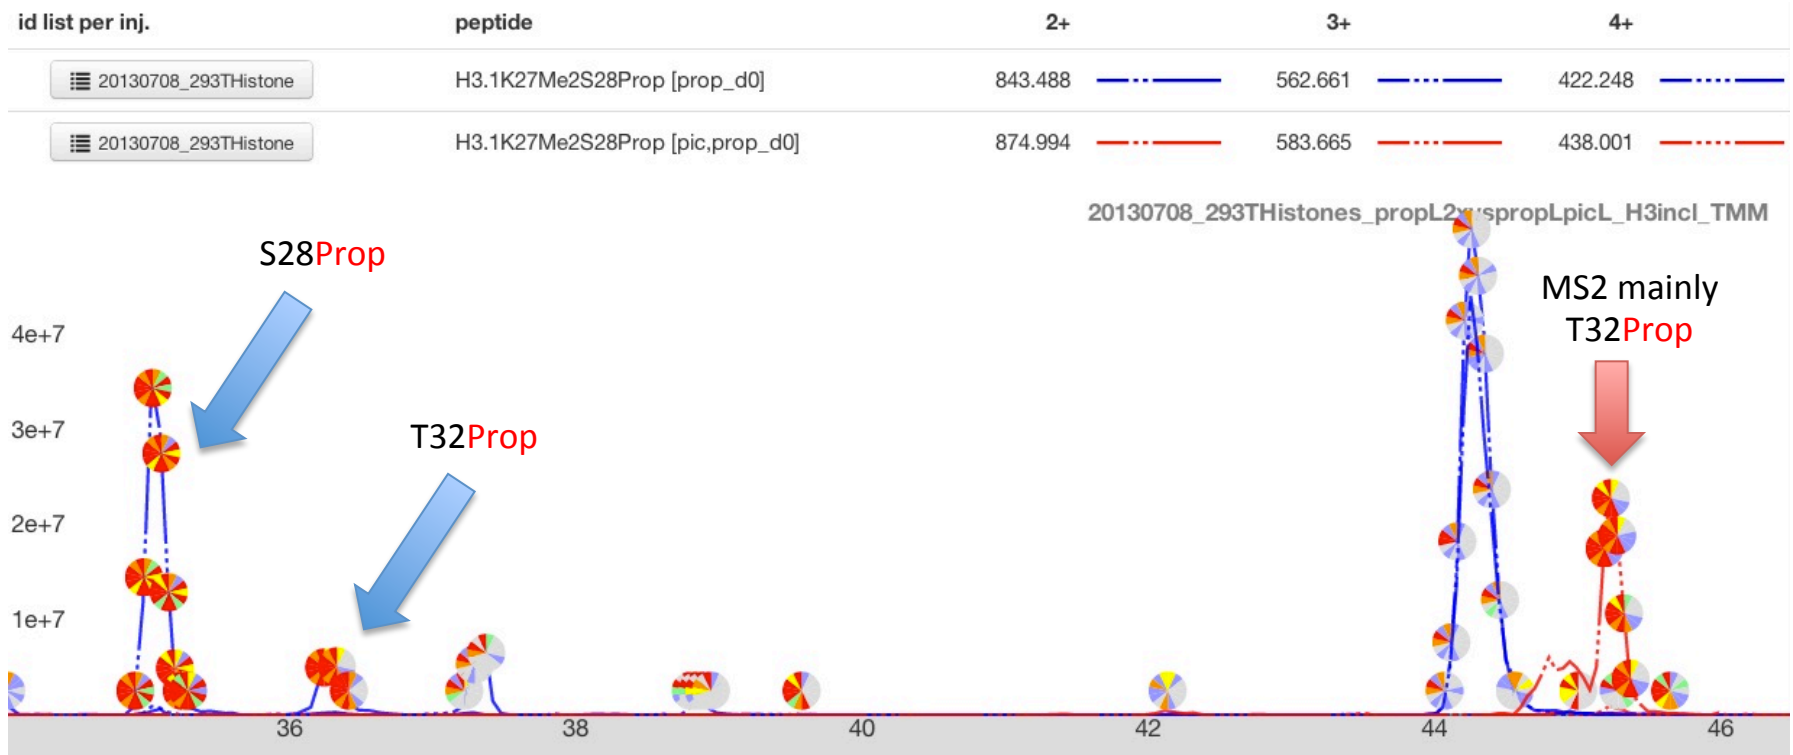

## Quanti event: 34.6-36.9min

| injection                                           | peptide                         | charge | m/z      | auc    |
|-----------------------------------------------------|---------------------------------|--------|----------|--------|
| 20130708_293THistones_propL2xvspropLpicL_H3incl_TMM | H3.1K27Me2S28Prop [prop_d0]     | 2      | 843.4885 | 6.6e+5 |
| 20130708_293THistones_propL2xvspropLpicL_H3incl_TMM | H3.1K27Me2S28Prop [pic,prop_d0] | 2      | 874.9939 | 0.0e+0 |
| 20130708_293THistones_propL2xvspropLpicL_H3incl_TMM | H3.1K27Me2S28Prop [prop_d0]     | 3      | 562.6614 | 7.2e+7 |
| 20130708_293THistones_propL2xvspropLpicL_H3incl_TMM | H3.1K27Me2S28Prop [pic,prop_d0] | 3      | 583.6651 | 0.0e+0 |
| 20130708_293THistones_propL2xvspropLpicL_H3incl_TMM | H3.1K27Me2S28Prop [prop_d0]     | 4      | 422.2479 | 1.8e+6 |
| 20130708_293THistones_propL2xvspropLpicL_H3incl_TMM | H3.1K27Me2S28Prop [pic,prop_d0] | 4      | 438.0006 | 0.0e+0 |

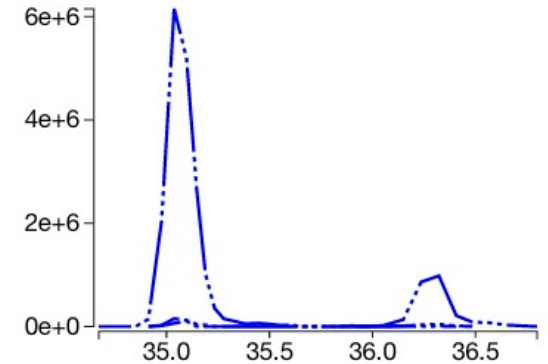

## Quanti event: 44.5-45.7min

| injection                                           | peptide                         | charge | m/z      | auc    |
|-----------------------------------------------------|---------------------------------|--------|----------|--------|
| 20130708_293THistones_propL2xvspropLpicL_H3incl_TMM | H3.1K27Me2S28Prop [prop_d0]     | 2      | 843.4885 | 6.5e+6 |
| 20130708_293THistones_propL2xvspropLpicL_H3incl_TMM | H3.1K27Me2S28Prop [pic,prop_d0] | 2      | 874.9939 | 4.7e+5 |
| 20130708_293THistones_propL2xvspropLpicL_H3incl_TMM | H3.1K27Me2S28Prop [prop_d0]     | 3      | 562.6614 | 5.5e+6 |
| 20130708_293THistones_propL2xvspropLpicL_H3incl_TMM | H3.1K27Me2S28Prop [pic,prop_d0] | 3      | 583.6651 | 6.2e+7 |
| 20130708_293THistones_propL2xvspropLpicL_H3incl_TMM | H3.1K27Me2S28Prop [prop_d0]     | 4      | 422.2479 | 0.0e+0 |
| 20130708_293THistones_propL2xvspropLpicL_H3incl_TMM | H3.1K27Me2S28Prop [pic,prop_d0] | 4      | 438.0006 | 1.8e+6 |

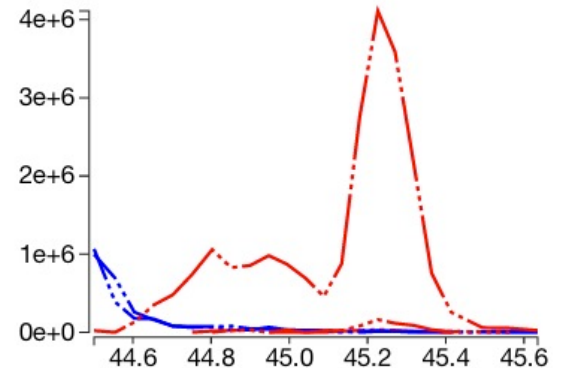

# H3.1\_K27-R40: Prop-KMe2SAPATPropGGVKKPHR MS/MS

**Experimental spectrum**

scan 5666  
 retention time 36.2min  
 precursor m/z 562.6595  
 precursor charge 3+

**Theoretical**

M H<sup>3+</sup> 562.6614  
 MH Δ<sub>mass</sub> Da -0.0056  
 MH Δ<sub>mass</sub> ppm -3.3

**edit peptide**

{Propionyl}K{Dimethyl}SAPAT{Propionyl}GGVK{Propionyl}K{Propionyl}PHR align

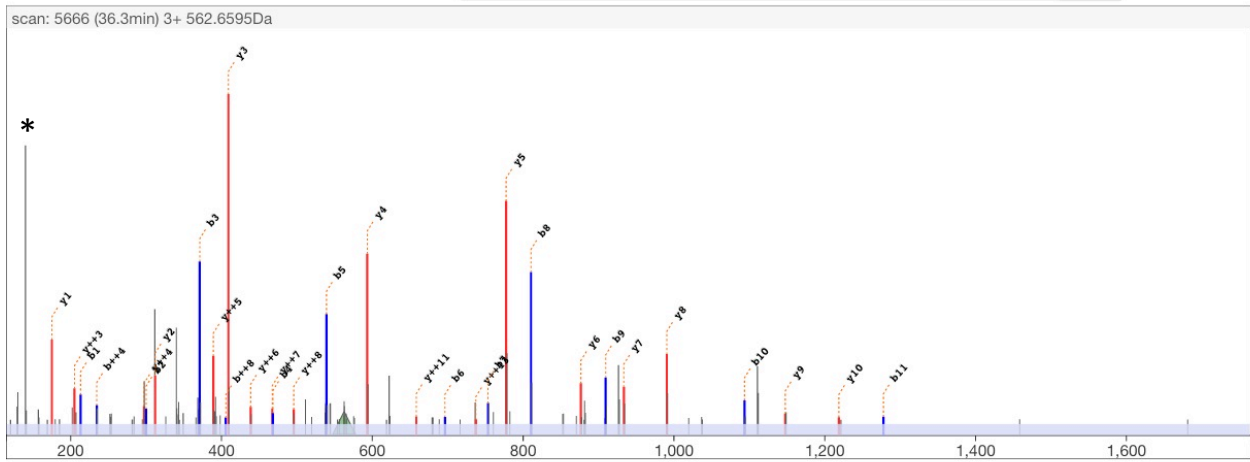

|    | b++    | b       |           | y       | y++    |
|----|--------|---------|-----------|---------|--------|
|    |        |         | Propionyl | 1629.94 | 815.48 |
| 1  | 107.08 | 213.16  | K         | 1473.82 | 737.41 |
|    |        |         | Dimethyl  |         |        |
| 2  | 150.60 | 300.19  | S         | 1386.79 | 693.90 |
| 3  | 186.12 | 371.23  | A         | 1315.75 | 658.38 |
| 4  | 234.64 | 468.28  | P         | 1218.70 | 609.85 |
| 5  | 270.16 | 539.32  | A         | 1147.66 | 574.33 |
| 6  | 348.70 | 696.39  | T         | 990.58  | 495.80 |
| 7  | 377.21 | 753.41  | G         | 933.56  | 467.29 |
| 8  | 405.72 | 810.44  | V         | 876.54  | 438.77 |
| 9  | 455.26 | 909.50  | K         | 777.47  | 389.24 |
| 10 | 547.32 | 1093.63 | Propionyl | 593.35  | 297.18 |
| 11 | 639.38 | 1277.75 | K         | 409.23  | 205.12 |
| 12 | 687.90 | 1374.80 | Propionyl | 312.18  | 156.59 |
| 13 | 756.43 | 1511.86 | P         | 175.12  | 88.06  |
| 14 | 834.48 | 1667.96 | H         |         |        |
|    |        |         | R         |         |        |

\* = 140Da diagnostic ion

# H3.1\_K27-R40: PIC-KMe2SAPATPropGGVKKPHR MS/MS

### Experimental spectrum

scan 8259  
 retention time 45.2min  
 precursor m/z 583.6643  
 precursor charge 3+

### Theoretical

M H<sup>3+</sup> 583.6651  
 MH Δ<sub>mass</sub> Da -0.0023  
 MH Δ<sub>mass</sub> ppm -1.3

### edit peptide

{PIC}K{Dimethyl}SAPAT{Propionyl}GGVK{Propionyl}K{Propionyl}PHR

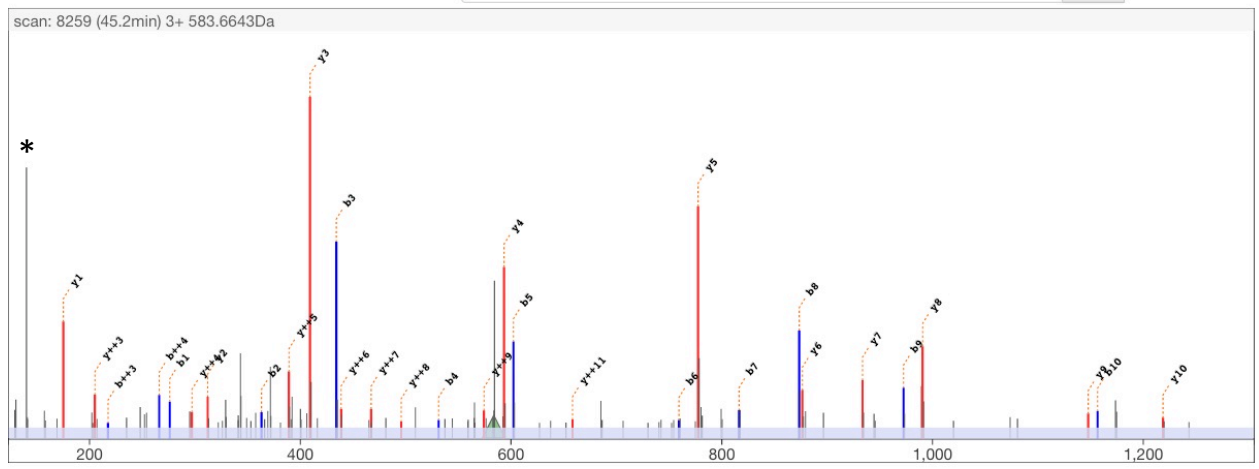

|    | b++    | b       |     | y       | y++    |    |
|----|--------|---------|-----|---------|--------|----|
|    | 60.53  | 120.04  | PIC | 1629.94 | 815.48 | 14 |
| 1  | 138.59 | 276.17  | K   | 1473.82 | 737.41 | 13 |
| 2  | 182.10 | 363.20  | S   | 1386.79 | 693.90 | 12 |
| 3  | 217.62 | 434.24  | A   | 1315.75 | 658.38 | 11 |
| 4  | 266.15 | 531.29  | P   | 1218.70 | 609.85 | 10 |
| 5  | 301.67 | 602.33  | A   | 1147.66 | 574.33 | 9  |
| 6  | 380.21 | 759.40  | T   | 990.58  | 495.80 | 8  |
| 7  | 408.72 | 816.43  | G   | 933.56  | 467.29 | 7  |
| 8  | 437.23 | 873.45  | V   | 876.54  | 438.77 | 6  |
| 9  | 486.76 | 972.51  | K   | 777.47  | 389.24 | 5  |
| 10 | 578.82 | 1156.64 | K   | 593.35  | 297.18 | 4  |
| 11 | 670.88 | 1340.76 | K   | 409.23  | 205.12 | 3  |
| 12 | 719.41 | 1437.81 | P   | 312.18  | 156.59 | 2  |
| 13 | 787.94 | 1574.87 | H   | 175.12  | 88.06  | 1  |
| 14 | 865.99 | 1730.97 | R   |         |        |    |

\* = 140Da diagnostic ion
