# Supplementary material
Source: PubMed Central journal article supplement (PMC4390259)
Supplement: supp_O114.046573_mcp.O114.046573-6.pdf [file supp_O114.046573_mcp.O114.046573-6.pdf]

# H3.1\_K27-R40:

## KMe3SAPATGGVKKPHR

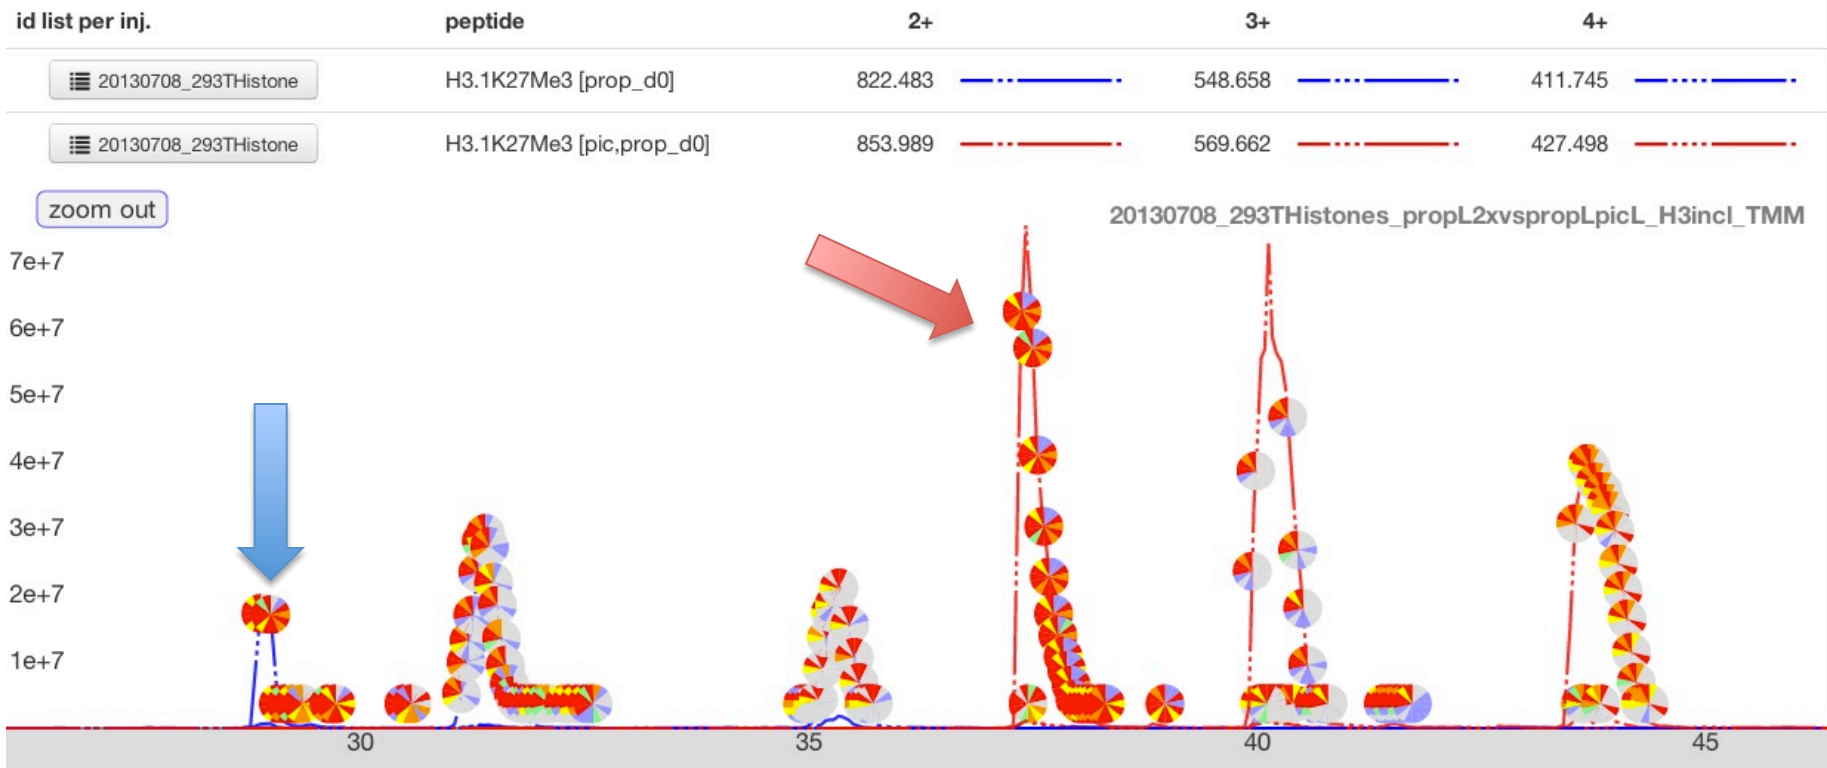

### Quanti event: 28.6-30.0min

| injection                                           | peptide                  | charge | m/z      | auc    |
|-----------------------------------------------------|--------------------------|--------|----------|--------|
| 20130708_293THistones_propL2xvspropLpicL_H3incl_TMM | H3.1K27Me3 [prop_d0]     | 2      | 822.4832 | 1.0e+6 |
| 20130708_293THistones_propL2xvspropLpicL_H3incl_TMM | H3.1K27Me3 [pic,prop_d0] | 2      | 853.9887 | 0.0e+0 |
| 20130708_293THistones_propL2xvspropLpicL_H3incl_TMM | H3.1K27Me3 [prop_d0]     | 3      | 548.6579 | 2.6e+8 |
| 20130708_293THistones_propL2xvspropLpicL_H3incl_TMM | H3.1K27Me3 [pic,prop_d0] | 3      | 569.6615 | 0.0e+0 |
| 20130708_293THistones_propL2xvspropLpicL_H3incl_TMM | H3.1K27Me3 [prop_d0]     | 4      | 411.7452 | 9.5e+6 |
| 20130708_293THistones_propL2xvspropLpicL_H3incl_TMM | H3.1K27Me3 [pic,prop_d0] | 4      | 427.4980 | 1.1e+4 |

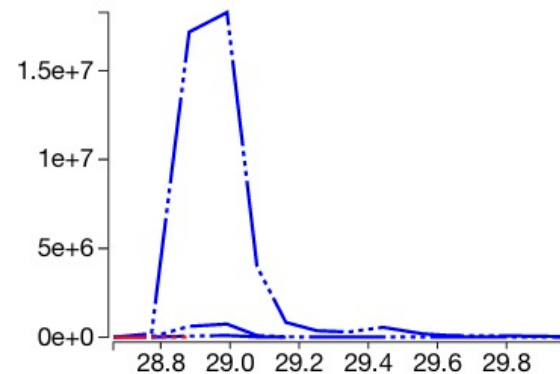

### Quanti event: 36.9-39.3min

| injection                                           | peptide                  | charge | m/z      | auc    |
|-----------------------------------------------------|--------------------------|--------|----------|--------|
| 20130708_293THistones_propL2xvspropLpicL_H3incl_TMM | H3.1K27Me3 [prop_d0]     | 2      | 822.4832 | 3.9e+4 |
| 20130708_293THistones_propL2xvspropLpicL_H3incl_TMM | H3.1K27Me3 [pic,prop_d0] | 2      | 853.9887 | 1.6e+7 |
| 20130708_293THistones_propL2xvspropLpicL_H3incl_TMM | H3.1K27Me3 [prop_d0]     | 3      | 548.6579 | 2.2e+6 |
| 20130708_293THistones_propL2xvspropLpicL_H3incl_TMM | H3.1K27Me3 [pic,prop_d0] | 3      | 569.6615 | 1.3e+9 |
| 20130708_293THistones_propL2xvspropLpicL_H3incl_TMM | H3.1K27Me3 [prop_d0]     | 4      | 411.7452 | 4.3e+6 |
| 20130708_293THistones_propL2xvspropLpicL_H3incl_TMM | H3.1K27Me3 [pic,prop_d0] | 4      | 427.4980 | 2.7e+7 |

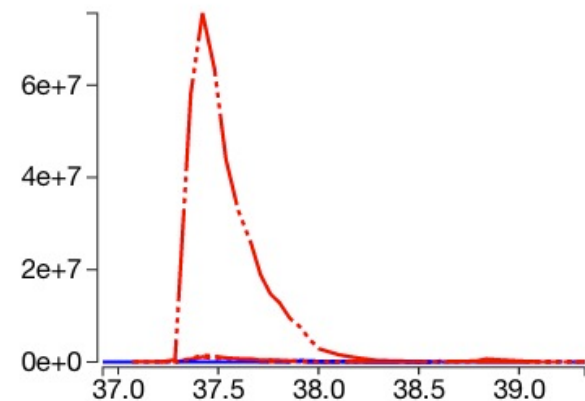

# H3.1\_K27-R40: Prop-KMe3SAPATGGVKKPHR MS/MS

### Experimental spectrum

scan 3987  
 retention time 28.9min  
 precursor m/z 548.6580  
 precursor charge 3+

### Theoretical

M H<sup>3+</sup> 548.6579  
 MH Δ<sub>mass</sub> Da 0.0002  
 MH Δ<sub>mass</sub> ppm 0.1

### edit peptide

{Propionyl}K{Trimethyl}SAPATGGV{Propionyl}K{Propionyl}PHR

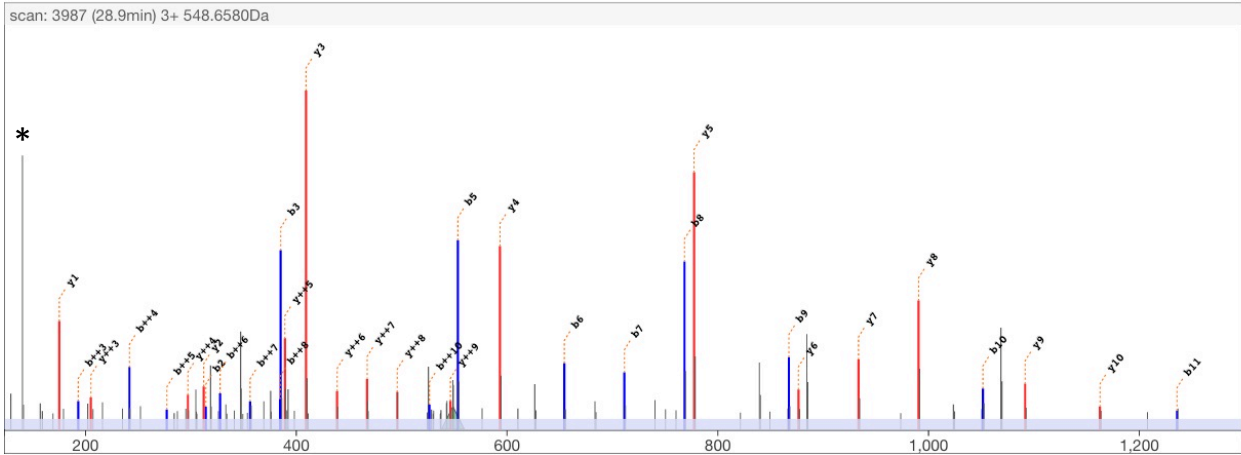

|    | b++    | b       |           | y       | y++    |    |
|----|--------|---------|-----------|---------|--------|----|
|    |        |         | Propionyl | 1587.93 | 794.47 | 14 |
| 1  | 114.09 | 227.18  | K         | 1417.79 | 709.40 | 13 |
| 2  | 157.61 | 314.21  | S         | 1330.76 | 665.88 | 12 |
| 3  | 193.13 | 385.24  | A         | 1259.72 | 630.36 | 11 |
| 4  | 241.65 | 482.30  | P         | 1162.67 | 581.84 | 10 |
| 5  | 277.17 | 553.33  | A         | 1091.63 | 546.32 | 9  |
| 6  | 327.69 | 654.38  | T         | 990.58  | 495.80 | 8  |
| 7  | 356.21 | 711.40  | G         | 933.56  | 467.29 | 7  |
| 8  | 384.72 | 768.43  | V         | 876.54  | 438.77 | 6  |
| 9  | 434.25 | 867.49  | K         | 777.47  | 389.24 | 5  |
| 10 | 526.31 | 1051.61 | Propionyl | 593.35  | 297.18 | 4  |
| 11 | 618.37 | 1235.74 | K         | 409.23  | 205.12 | 3  |
| 12 | 666.90 | 1332.79 | P         | 312.18  | 156.59 | 2  |
| 13 | 735.43 | 1469.85 | H         | 175.12  | 88.06  | 1  |
| 14 | 813.48 | 1625.95 | R         |         |        |    |

\* = 140Da diagnostic ion

# H3.1\_K27-R40: PIC-KMe3SAPATGGVKKPHR MS/MS

### Experimental spectrum

scan 5958  
 retention time 37.6min  
 precursor m/z 569.6595  
 precursor charge 3+

### Theoretical

M H<sup>3+</sup> 569.6615  
 MH Δ<sub>mass</sub> Da -0.0062  
 MH Δ<sub>mass</sub> ppm -3.6

### edit peptide

{PIC}K{Trimethyl}SAPATGGV{Propionyl}K{Propionyl}PHR

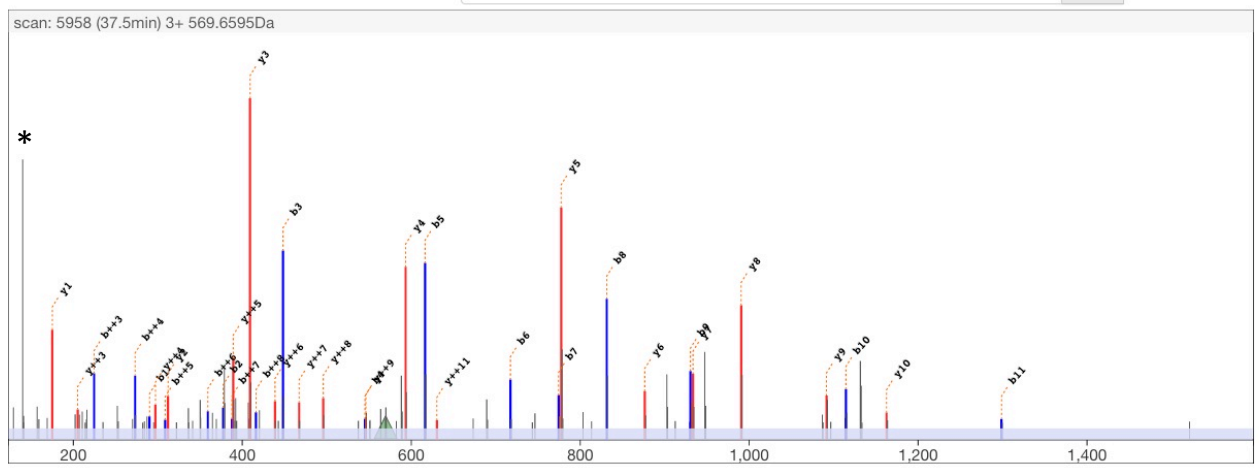

|    | b++    | b       |           | y       | y++    |    |
|----|--------|---------|-----------|---------|--------|----|
|    | 60.53  | 120.04  | PIC       | 1587.93 | 794.47 | 14 |
| 1  | 145.60 | 290.19  | K         | 1417.79 | 709.40 | 13 |
| 2  | 189.11 | 377.22  | S         | 1330.76 | 665.88 | 12 |
| 3  | 224.63 | 448.26  | A         | 1259.72 | 630.36 | 11 |
| 4  | 273.16 | 545.31  | P         | 1162.67 | 581.84 | 10 |
| 5  | 308.68 | 616.35  | A         | 1091.63 | 546.32 | 9  |
| 6  | 359.20 | 717.39  | T         | 990.58  | 495.80 | 8  |
| 7  | 387.71 | 774.41  | G         | 933.56  | 467.29 | 7  |
| 8  | 416.22 | 831.44  | V         | 876.54  | 438.77 | 6  |
| 9  | 465.76 | 930.50  | K         | 777.47  | 389.24 | 5  |
| 10 | 557.82 | 1114.63 | Propionyl | 593.35  | 297.18 | 4  |
| 11 | 649.88 | 1298.75 | K         | 409.23  | 205.12 | 3  |
| 12 | 698.40 | 1395.80 | P         | 312.18  | 156.59 | 2  |
| 13 | 766.93 | 1532.86 | H         | 175.12  | 88.06  | 1  |
| 14 | 844.98 | 1688.96 | R         |         |        |    |

\* = 140Da diagnostic ion

# H3.1\_K27-R40:

KMe3SPoAPATGGVKKPHR

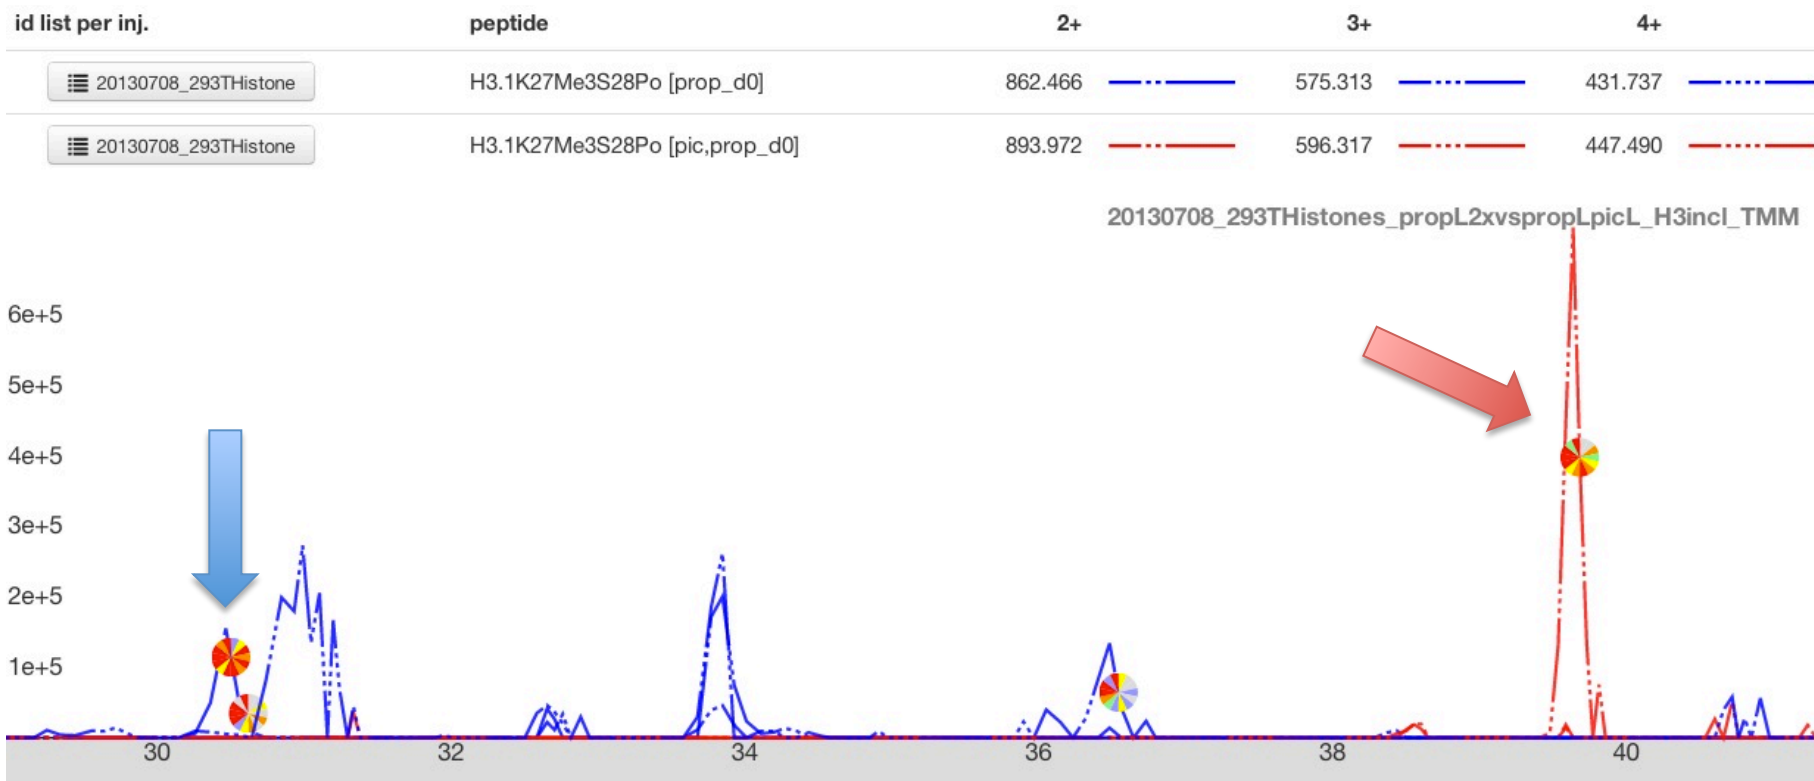

### Quanti event: 30.1-30.7min

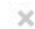

| injection                                           | peptide                       | charge | m/z      | auc    |
|-----------------------------------------------------|-------------------------------|--------|----------|--------|
| 20130708_293THistones_propL2xvspropLpicL_H3incl_TMM | H3.1K27Me3S28Po [prop_d0]     | 2      | 862.4664 | 0.0e+0 |
| 20130708_293THistones_propL2xvspropLpicL_H3incl_TMM | H3.1K27Me3S28Po [pic,prop_d0] | 2      | 893.9718 | 0.0e+0 |
| 20130708_293THistones_propL2xvspropLpicL_H3incl_TMM | H3.1K27Me3S28Po [prop_d0]     | 3      | 575.3133 | 7.9e+5 |
| 20130708_293THistones_propL2xvspropLpicL_H3incl_TMM | H3.1K27Me3S28Po [pic,prop_d0] | 3      | 596.3170 | 0.0e+0 |
| 20130708_293THistones_propL2xvspropLpicL_H3incl_TMM | H3.1K27Me3S28Po [prop_d0]     | 4      | 431.7368 | 8.3e+4 |
| 20130708_293THistones_propL2xvspropLpicL_H3incl_TMM | H3.1K27Me3S28Po [pic,prop_d0] | 4      | 447.4896 | 0.0e+0 |

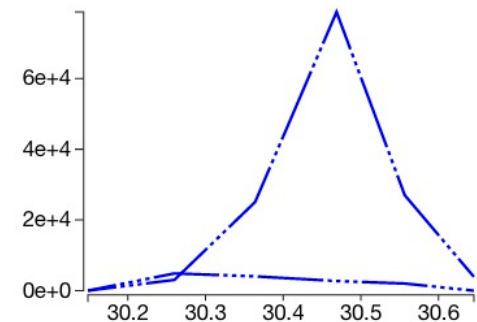

### Quanti event: 39.3-40.1min

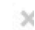

| injection                                           | peptide                       | charge | m/z      | auc    |
|-----------------------------------------------------|-------------------------------|--------|----------|--------|
| 20130708_293THistones_propL2xvspropLpicL_H3incl_TMM | H3.1K27Me3S28Po [prop_d0]     | 2      | 862.4664 | 0.0e+0 |
| 20130708_293THistones_propL2xvspropLpicL_H3incl_TMM | H3.1K27Me3S28Po [pic,prop_d0] | 2      | 893.9718 | 2.2e+4 |
| 20130708_293THistones_propL2xvspropLpicL_H3incl_TMM | H3.1K27Me3S28Po [prop_d0]     | 3      | 575.3133 | 0.0e+0 |
| 20130708_293THistones_propL2xvspropLpicL_H3incl_TMM | H3.1K27Me3S28Po [pic,prop_d0] | 3      | 596.3170 | 2.8e+6 |
| 20130708_293THistones_propL2xvspropLpicL_H3incl_TMM | H3.1K27Me3S28Po [prop_d0]     | 4      | 431.7368 | 0.0e+0 |
| 20130708_293THistones_propL2xvspropLpicL_H3incl_TMM | H3.1K27Me3S28Po [pic,prop_d0] | 4      | 447.4896 | 2.9e+4 |

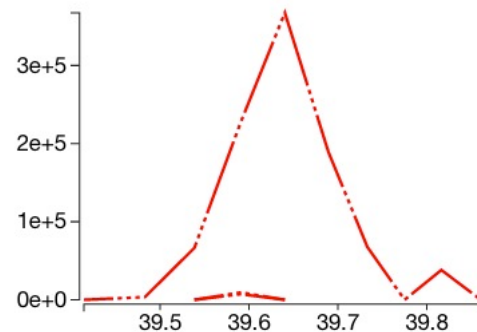

### Experimental spectrum

scan 4265  
 retention time 30.5min  
 precursor m/z 575.3120  
 precursor charge 3+

### Theoretical

M H<sup>3+</sup> 575.3133  
 MH Δ<sub>mass</sub> Da -0.0042  
 MH Δ<sub>mass</sub> ppm -2.4

### edit peptide

{Propionyl}K{Trimethyl}S{Phospho}APATGGV{Propionyl}K{Propionyl}PHR

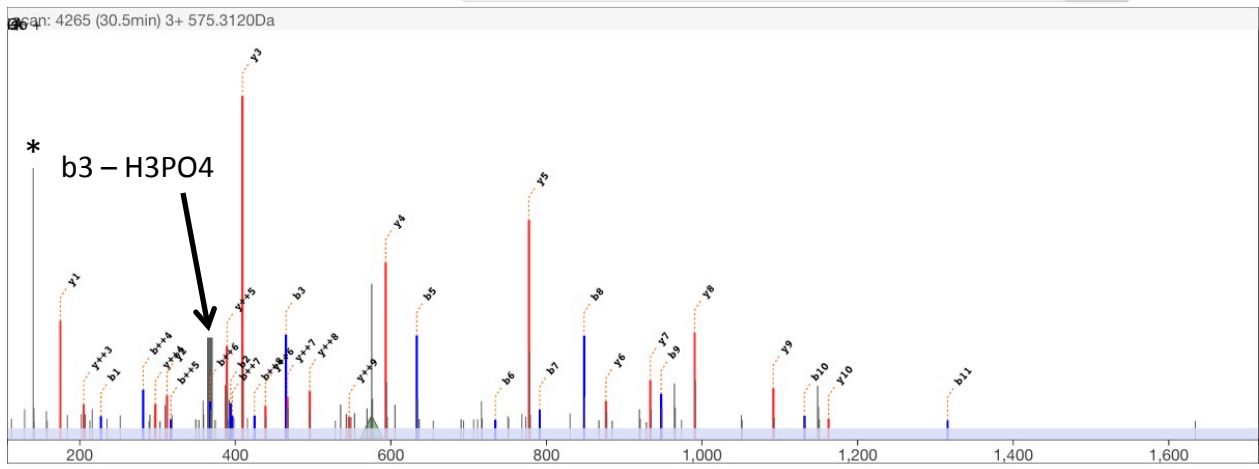

| Anchor         | Current         |
|----------------|-----------------|
| click on peak  | mouse over peak |
| m/z 465.2105   | m/z 367.2333    |
| intensity 2022 | intensity 1956  |
| int. rank 6    | int. rank 9     |

**Explanation?**  
 delta mass could be...  
 Δ<sub>m/z</sub> -97.97714

**Tune the seq**  
 Align anchor peak

|    | b++    | b       |           | y       | y++    |    |
|----|--------|---------|-----------|---------|--------|----|
|    |        |         | Propionyl | 1667.90 | 834.45 | 14 |
| 1  | 114.09 | 227.18  | K         | 1497.76 | 749.38 | 13 |
|    |        |         | Trimethyl |         |        |    |
| 2  | 197.59 | 394.17  | S         | 1330.76 | 665.88 | 12 |
|    |        |         | Phospho   |         |        |    |
| 3  | 233.11 | 465.21  | A         | 1259.72 | 630.36 | 11 |
| 4  | 281.64 | 562.26  | P         | 1162.67 | 581.84 | 10 |
| 5  | 317.15 | 633.30  | A         | 1091.63 | 546.32 | 9  |
| 6  | 367.68 | 734.35  | T         | 990.58  | 495.80 | 8  |
| 7  | 396.19 | 791.37  | G         | 933.56  | 467.29 | 7  |
| 8  | 424.70 | 848.39  | V         | 876.54  | 438.77 | 6  |
| 9  | 474.23 | 947.46  | K         | 777.47  | 389.24 | 5  |
| 10 | 566.29 | 1131.58 | Propionyl | 593.35  | 297.18 | 4  |
| 11 | 658.35 | 1315.70 | K         | 409.23  | 205.12 | 3  |
| 12 | 706.88 | 1412.75 | P         | 312.18  | 156.59 | 2  |
| 13 | 775.41 | 1549.81 | H         | 175.12  | 88.06  | 1  |
| 14 | 853.46 | 1705.91 | R         |         |        |    |

\* = 140Da diagnostic ion

Phospho-loss also on b5 and b8 ions.

### Experimental spectrum

scan 6544  
 retention time 39.7min  
 precursor m/z 596.3169  
 precursor charge 3+

### Theoretical

M H<sup>3+</sup> 596.3170  
 MH  $\Delta_{mass}$  Da -0.0003  
 MH  $\Delta_{mass}$  ppm -0.1

### edit peptide

(PIC)K(Trimethyl)S(Phospho)APATGGV(K)(Propionyl)PHR

b3 - H3PO4

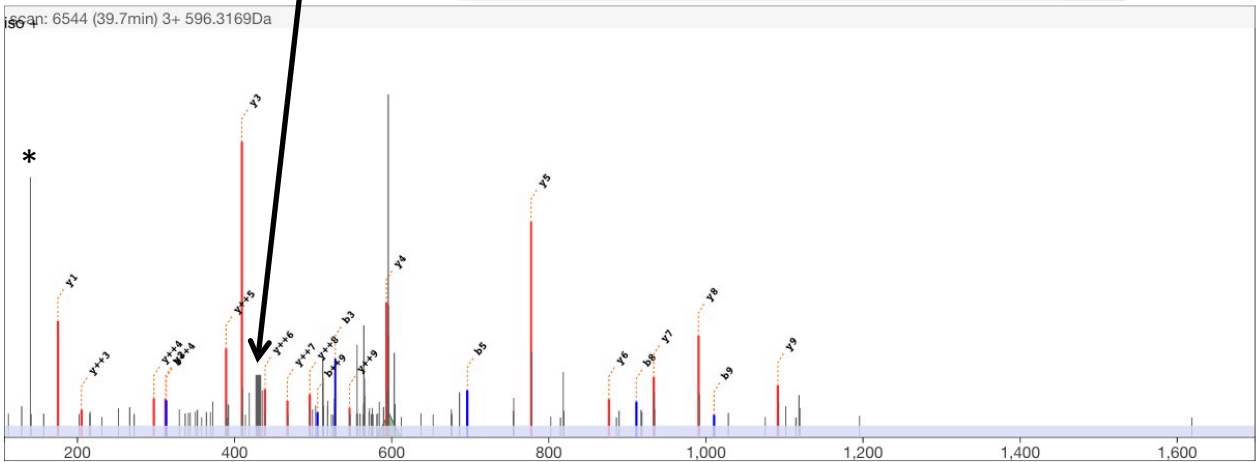

| Anchor         | Current         |
|----------------|-----------------|
| click on peak  | mouse over peak |
| m/z 528.2213   | m/z 430.2456    |
| intensity 4575 | intensity 3476  |
| int. rank 13   | int. rank 16    |

**Explanation?**  
 delta mass could be...  
 $\Delta_{m/z}$  -97.97568

**Tune the seq**  
 Align anchor peak

|    | b++    | b       |           | y       | y++    |    |
|----|--------|---------|-----------|---------|--------|----|
|    | 60.53  | 120.04  | PIC       | 1667.90 | 834.45 | 14 |
| 1  | 145.60 | 290.19  | K         | 1497.76 | 749.38 | 13 |
| 2  | 229.10 | 457.18  | S         | 1330.76 | 665.88 | 12 |
| 3  | 264.61 | 528.22  | Phospho   | 1259.72 | 630.36 | 11 |
| 4  | 313.14 | 625.27  | A         | 1162.67 | 581.84 | 10 |
| 5  | 348.66 | 696.31  | P         | 1091.63 | 546.32 | 9  |
| 6  | 399.18 | 797.36  | T         | 990.58  | 495.80 | 8  |
| 7  | 427.69 | 854.38  | G         | 933.56  | 467.29 | 7  |
| 8  | 456.20 | 911.40  | V         | 876.54  | 438.77 | 6  |
| 9  | 505.74 | 1010.47 | K         | 777.47  | 389.24 | 5  |
| 10 | 597.80 | 1194.59 | Propionyl | 593.35  | 297.18 | 4  |
| 11 | 689.86 | 1378.71 | K         | 409.23  | 205.12 | 3  |
| 12 | 738.39 | 1475.77 | Propionyl | 312.18  | 156.59 | 2  |
| 13 | 806.92 | 1612.82 | P         | 175.12  | 88.06  | 1  |
| 14 | 884.97 | 1768.93 | H         |         |        |    |
|    |        |         | R         |         |        |    |

\* = 140Da diagnostic ion

Phospho-loss also on b5 and b8 ions.



# H3.1\_K27-R40:

KMe3SProp?APATProp?GGVKKPHR

Earlier eluting peak is S28-prop. Double-peak for Prop-labeling and merged peak for PIC-labeling. Combined AUCs for both PTMs. T32-MS2s shown.

| id list per inj.     | peptide                         | 2+      | 3+      | 4+      |
|----------------------|---------------------------------|---------|---------|---------|
| 20130708_293THistone | H3.1K27Me3S28Prop [prop_d0]     | 850.496 | 567.333 | 425.752 |
| 20130708_293THistone | H3.1K27Me3S28Prop [pic,prop_d0] | 882.002 | 588.337 | 441.505 |

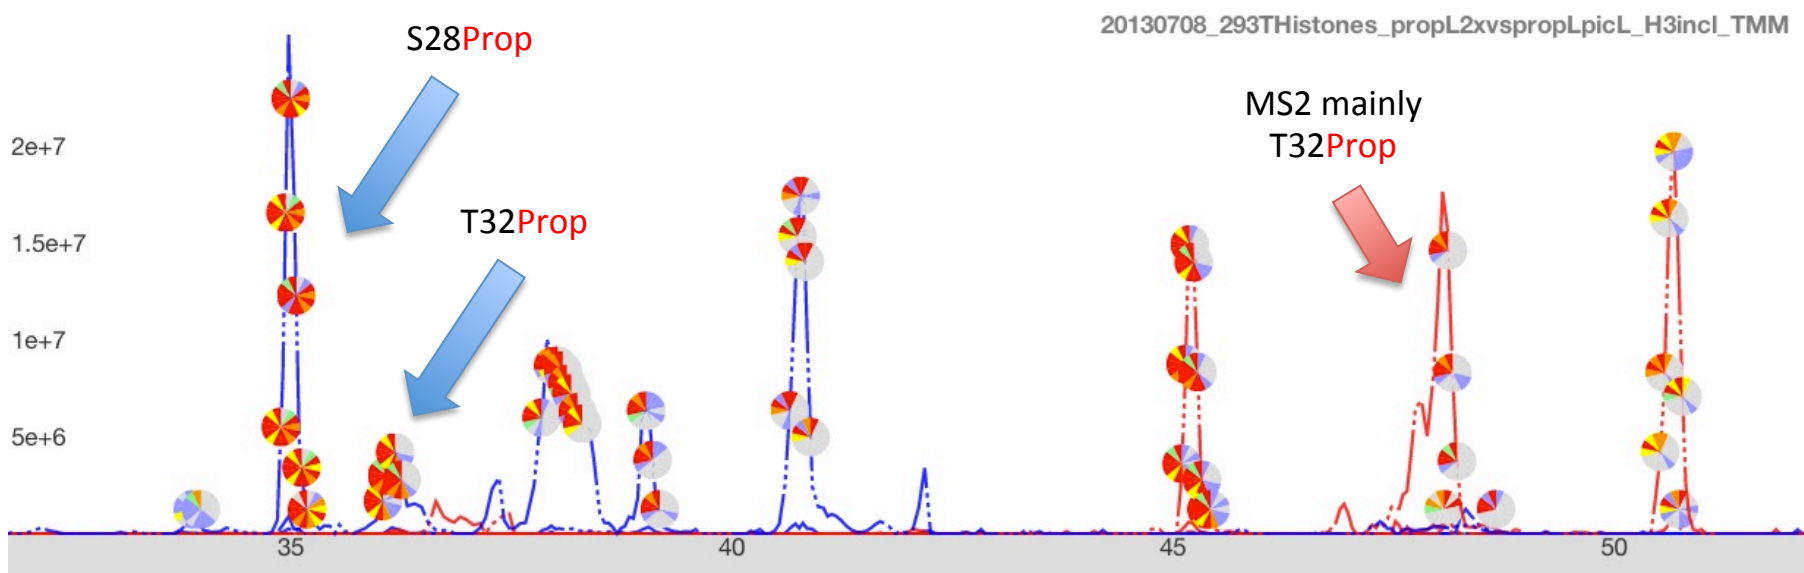

### Quanti event: 34.7-37.0min

| injection                                           | peptide                         | charge | m/z      | auc    |
|-----------------------------------------------------|---------------------------------|--------|----------|--------|
| 20130708_293THistones_propL2xvspropLpicL_H3incl_TMM | H3.1K27Me3S28Prop [prop_d0]     | 2      | 850.4963 | 3.5e+5 |
| 20130708_293THistones_propL2xvspropLpicL_H3incl_TMM | H3.1K27Me3S28Prop [pic,prop_d0] | 2      | 882.0018 | 0.0e+0 |
| 20130708_293THistones_propL2xvspropLpicL_H3incl_TMM | H3.1K27Me3S28Prop [prop_d0]     | 3      | 567.3333 | 4.6e+7 |
| 20130708_293THistones_propL2xvspropLpicL_H3incl_TMM | H3.1K27Me3S28Prop [pic,prop_d0] | 3      | 588.3369 | 3.4e+6 |
| 20130708_293THistones_propL2xvspropLpicL_H3incl_TMM | H3.1K27Me3S28Prop [prop_d0]     | 4      | 425.7518 | 1.5e+6 |
| 20130708_293THistones_propL2xvspropLpicL_H3incl_TMM | H3.1K27Me3S28Prop [pic,prop_d0] | 4      | 441.5045 | 0.0e+0 |

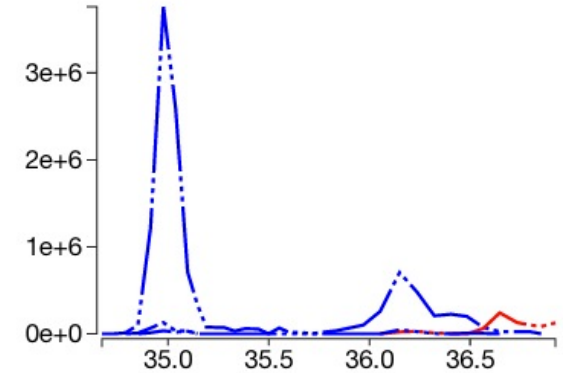

### Quanti event: 45.0-46.0min

| injection                                           | peptide                         | charge | m/z      | auc    |
|-----------------------------------------------------|---------------------------------|--------|----------|--------|
| 20130708_293THistones_propL2xvspropLpicL_H3incl_TMM | H3.1K27Me3S28Prop [prop_d0]     | 2      | 850.4963 | 0.0e+0 |
| 20130708_293THistones_propL2xvspropLpicL_H3incl_TMM | H3.1K27Me3S28Prop [pic,prop_d0] | 2      | 882.0018 | 7.3e+4 |
| 20130708_293THistones_propL2xvspropLpicL_H3incl_TMM | H3.1K27Me3S28Prop [prop_d0]     | 3      | 567.3333 | 3.0e+5 |
| 20130708_293THistones_propL2xvspropLpicL_H3incl_TMM | H3.1K27Me3S28Prop [pic,prop_d0] | 3      | 588.3369 | 2.2e+7 |
| 20130708_293THistones_propL2xvspropLpicL_H3incl_TMM | H3.1K27Me3S28Prop [prop_d0]     | 4      | 425.7518 | 0.0e+0 |
| 20130708_293THistones_propL2xvspropLpicL_H3incl_TMM | H3.1K27Me3S28Prop [pic,prop_d0] | 4      | 441.5045 | 8.2e+5 |

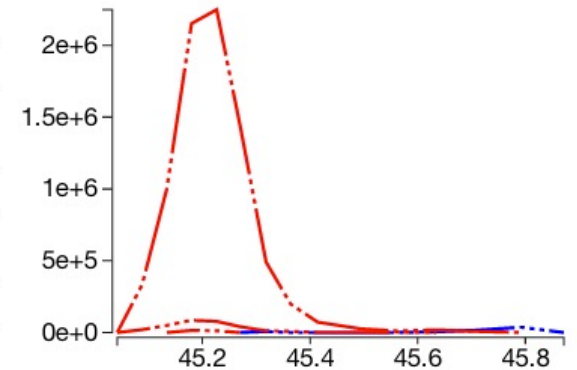

# H3.1\_K27-R40: Prop-KMe3SAPATPropGGVKKPHR MS/MS

### Experimental spectrum

scan 5632  
 retention time 36.0min  
 precursor m/z 567.3344  
 precursor charge 3+

### Theoretical

M H<sup>3+</sup> 567.3333  
 MH Δ<sub>mass</sub> Da 0.0033  
 MH Δ<sub>mass</sub> ppm 1.9

### edit peptide

{Propionyl}K{Trimethyl}SAPAT{Propionyl}GGVK{Propionyl}K{Propionyl}PHR align

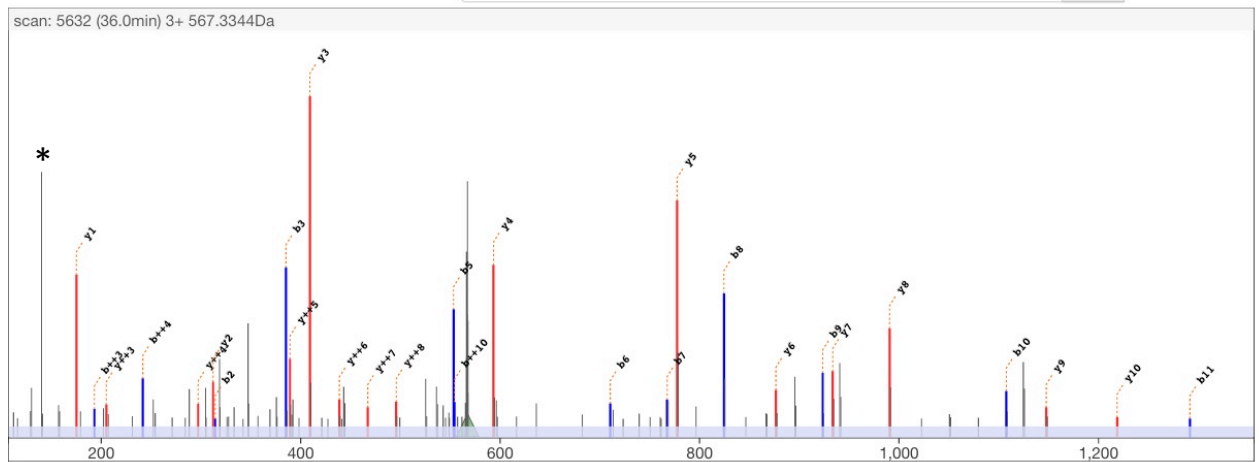

|    | b++    | b       |           | y       | y++    |    |
|----|--------|---------|-----------|---------|--------|----|
|    |        |         | Propionyl | 1643.96 | 822.48 | 14 |
| 1  | 114.09 | 227.18  | K         | 1473.82 | 737.41 | 13 |
|    |        |         | Trimethyl |         |        |    |
| 2  | 157.61 | 314.21  | S         | 1386.79 | 693.90 | 12 |
|    |        |         | A         | 1315.75 | 658.38 | 11 |
| 3  | 193.13 | 385.24  | P         | 1218.70 | 609.85 | 10 |
|    |        |         | A         | 1147.66 | 574.33 | 9  |
| 4  | 241.65 | 482.30  | T         | 990.58  | 495.80 | 8  |
| 5  | 277.17 | 553.33  | G         | 933.56  | 467.29 | 7  |
| 6  | 355.71 | 710.41  | V         | 876.54  | 438.77 | 6  |
| 7  | 384.22 | 767.43  | G         | 777.47  | 389.24 | 5  |
| 8  | 412.73 | 824.45  | V         | 593.35  | 297.18 | 4  |
| 9  | 462.26 | 923.52  | K         | 409.23  | 205.12 | 3  |
| 10 | 554.32 | 1107.64 | K         | 312.18  | 156.59 | 2  |
| 11 | 646.38 | 1291.76 | P         | 175.12  | 88.06  | 1  |
| 12 | 694.91 | 1388.81 | H         |         |        |    |
| 13 | 763.44 | 1525.87 | R         |         |        |    |
| 14 | 841.49 | 1681.97 |           |         |        |    |

\* = 140Da diagnostic ion

# H3.1\_K27-R40: PIC-KMe3SAPATPropGGVKKPHR MS/MS

### Experimental spectrum

scan 8245  
 retention time 45.2min  
 precursor m/z 588.3356  
 precursor charge 3+

### Theoretical

M H<sup>3+</sup> 588.3369  
 MH Δ<sub>mass</sub> Da -0.0041  
 MH Δ<sub>mass</sub> ppm -2.3

### edit peptide

{PIC}K{Trimethyl}SAPAT{Propionyl}GGVK{Propionyl}K{Propionyl}PHR

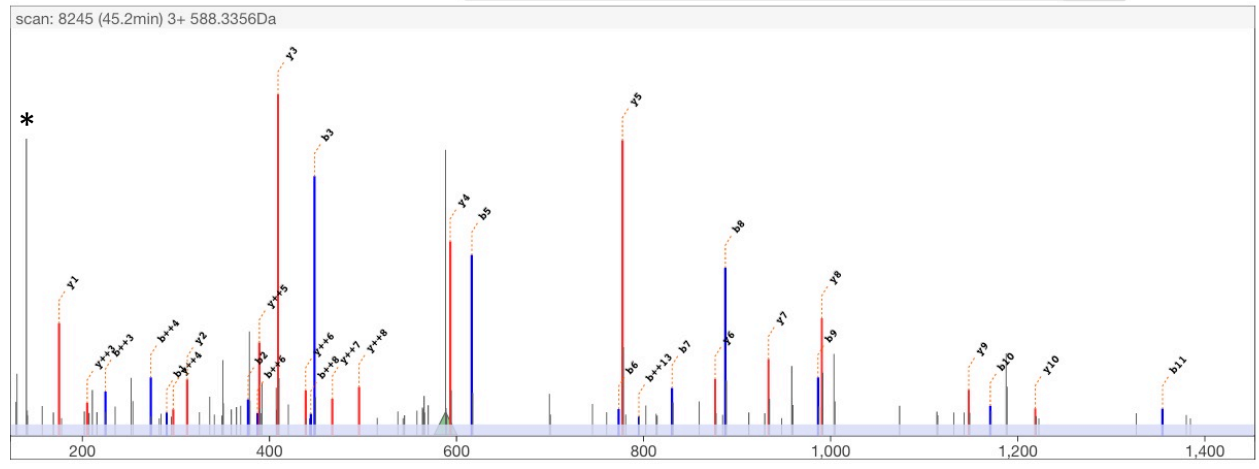

|    | b++    | b       |     | y       | y++    |    |
|----|--------|---------|-----|---------|--------|----|
|    | 60.53  | 120.04  | PIC | 1643.96 | 822.48 | 14 |
| 1  | 145.60 | 290.19  | K   | 1473.82 | 737.41 | 13 |
| 2  | 189.11 | 377.22  | S   | 1386.79 | 693.90 | 12 |
| 3  | 224.63 | 448.26  | A   | 1315.75 | 658.38 | 11 |
| 4  | 273.16 | 545.31  | P   | 1218.70 | 609.85 | 10 |
| 5  | 308.68 | 616.35  | A   | 1147.66 | 574.33 | 9  |
| 6  | 387.21 | 773.42  | T   | 990.58  | 495.80 | 8  |
| 7  | 415.72 | 830.44  | G   | 933.56  | 467.29 | 7  |
| 8  | 444.23 | 887.46  | V   | 876.54  | 438.77 | 6  |
| 9  | 493.77 | 986.53  | K   | 777.47  | 389.24 | 5  |
| 10 | 585.83 | 1170.65 | K   | 593.35  | 297.18 | 4  |
| 11 | 677.89 | 1354.77 | K   | 409.23  | 205.12 | 3  |
| 12 | 726.42 | 1451.83 | P   | 312.18  | 156.59 | 2  |
| 13 | 794.95 | 1588.88 | H   | 175.12  | 88.06  | 1  |
| 14 | 873.00 | 1744.99 | R   |         |        |    |

\* = 140Da diagnostic ion

# H3.1\_K27-R40:

## KA<sub>c</sub>SAPATGGVKKPHR

No MS2 for Prop-only peak detected.

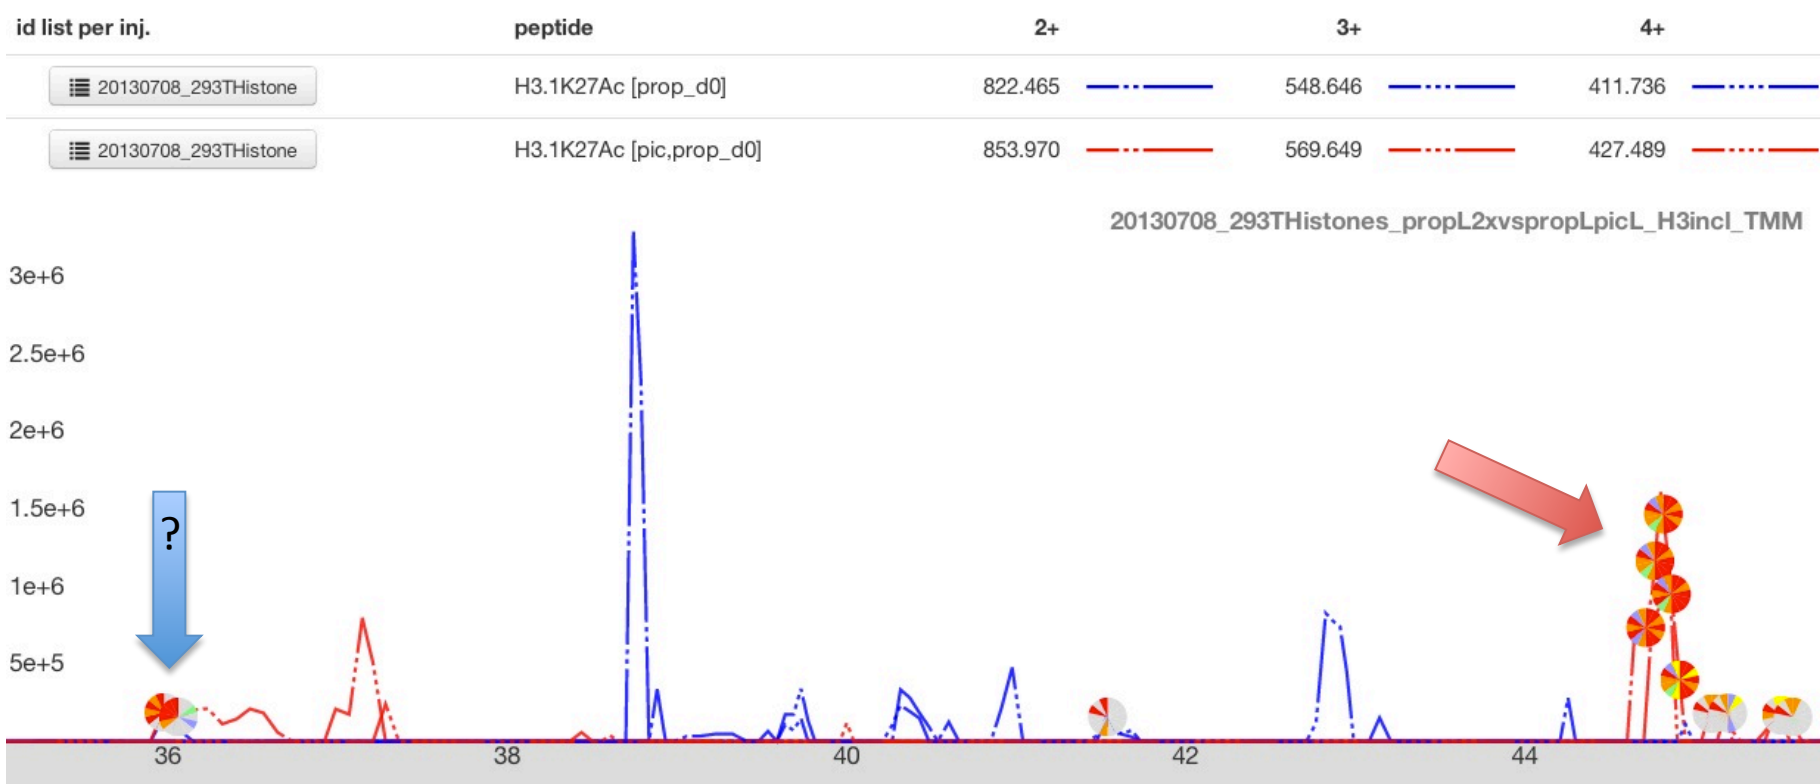

Quanti event: 44.5-45.0min

| injection                                           | peptide                 | charge | m/z      | auc    |
|-----------------------------------------------------|-------------------------|--------|----------|--------|
| 20130708_293THistones_propL2xvspropLpicL_H3incl_TMM | H3.1K27Ac [prop_d0]     | 2      | 822.4650 | 0.0e+0 |
| 20130708_293THistones_propL2xvspropLpicL_H3incl_TMM | H3.1K27Ac [pic,prop_d0] | 2      | 853.9705 | 2.0e+6 |
| 20130708_293THistones_propL2xvspropLpicL_H3incl_TMM | H3.1K27Ac [prop_d0]     | 3      | 548.6458 | 0.0e+0 |
| 20130708_293THistones_propL2xvspropLpicL_H3incl_TMM | H3.1K27Ac [pic,prop_d0] | 3      | 569.6494 | 1.0e+6 |
| 20130708_293THistones_propL2xvspropLpicL_H3incl_TMM | H3.1K27Ac [prop_d0]     | 4      | 411.7361 | 3.7e+4 |
| 20130708_293THistones_propL2xvspropLpicL_H3incl_TMM | H3.1K27Ac [pic,prop_d0] | 4      | 427.4889 | 0.0e+0 |

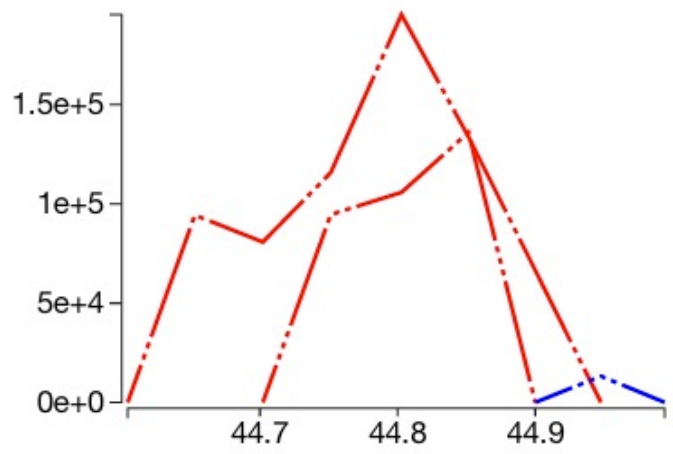

No MS2 for Prop-only peak detected.

# H3.1\_K27-R40: PIC-KAcSAPATGGVKKPHR MS/MS

### Experimental spectrum

scan 8133  
 retention time 44.9min  
 precursor m/z 853.9679  
 precursor charge 2+

### Theoretical

M H<sup>2+</sup> 853.9705  
 MH Δ<sub>mass</sub> Da -0.0052  
 MH Δ<sub>mass</sub> ppm -3.0

### edit peptide

{PIC}K{Acetyl}SAPATGGVK{Propionyl}K{Propionyl}PHR

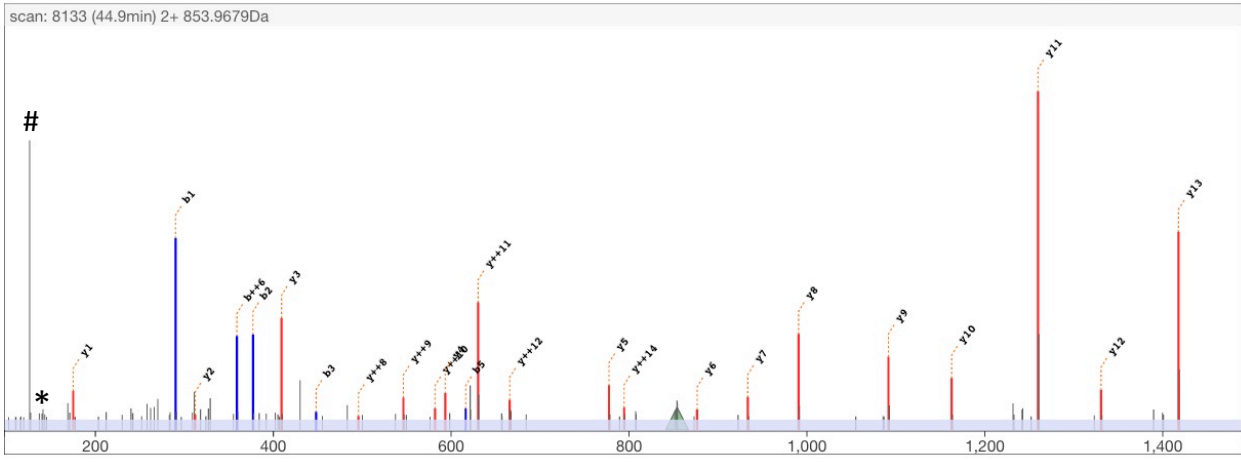

|    | b++    | b       |           | y       | y++    |    |
|----|--------|---------|-----------|---------|--------|----|
|    | 60.53  | 120.04  | PIC       | 1587.90 | 794.45 | 14 |
| 1  | 145.58 | 290.15  | K         | 1417.79 | 709.40 | 13 |
| 2  | 189.09 | 377.18  | Acetyl    | 1330.76 | 665.88 | 12 |
| 3  | 224.61 | 448.22  | S         | 1259.72 | 630.36 | 11 |
| 4  | 273.14 | 545.27  | A         | 1162.67 | 581.84 | 10 |
| 5  | 308.66 | 616.31  | P         | 1091.63 | 546.32 | 9  |
| 6  | 359.18 | 717.36  | A         | 990.58  | 495.80 | 8  |
| 7  | 387.69 | 774.38  | T         | 933.56  | 467.29 | 7  |
| 8  | 416.20 | 831.40  | G         | 876.54  | 438.77 | 6  |
| 9  | 465.74 | 930.47  | V         | 819.52  | 410.25 | 5  |
| 10 | 557.80 | 1114.59 | K         | 777.47  | 389.24 | 4  |
| 11 | 649.86 | 1298.71 | Propionyl | 593.35  | 297.18 | 3  |
| 12 | 698.39 | 1395.76 | K         | 409.23  | 205.12 | 2  |
| 13 | 766.91 | 1532.82 | Propionyl | 312.18  | 156.59 | 1  |
| 14 | 844.97 | 1688.92 | P         | 175.12  | 88.06  | 0  |
|    |        |         | H         |         |        |    |
|    |        |         | R         |         |        |    |

\* = 140Da diagnostic ion  
 # = 126Da diagnostic ion

# H3.1\_K27-R40:

## KSAPATGGVKMe1KPHR

| id list per inj.       | peptide                 | 2+      | 3+      | 4+      |
|------------------------|-------------------------|---------|---------|---------|
| ☰ 20130708_293THistone | H3.1K36Me [prop_d0]     | 836.481 | 557.990 | 418.744 |
| ☰ 20130708_293THistone | H3.1K36Me [pic,prop_d0] | 867.986 | 578.993 | 434.497 |

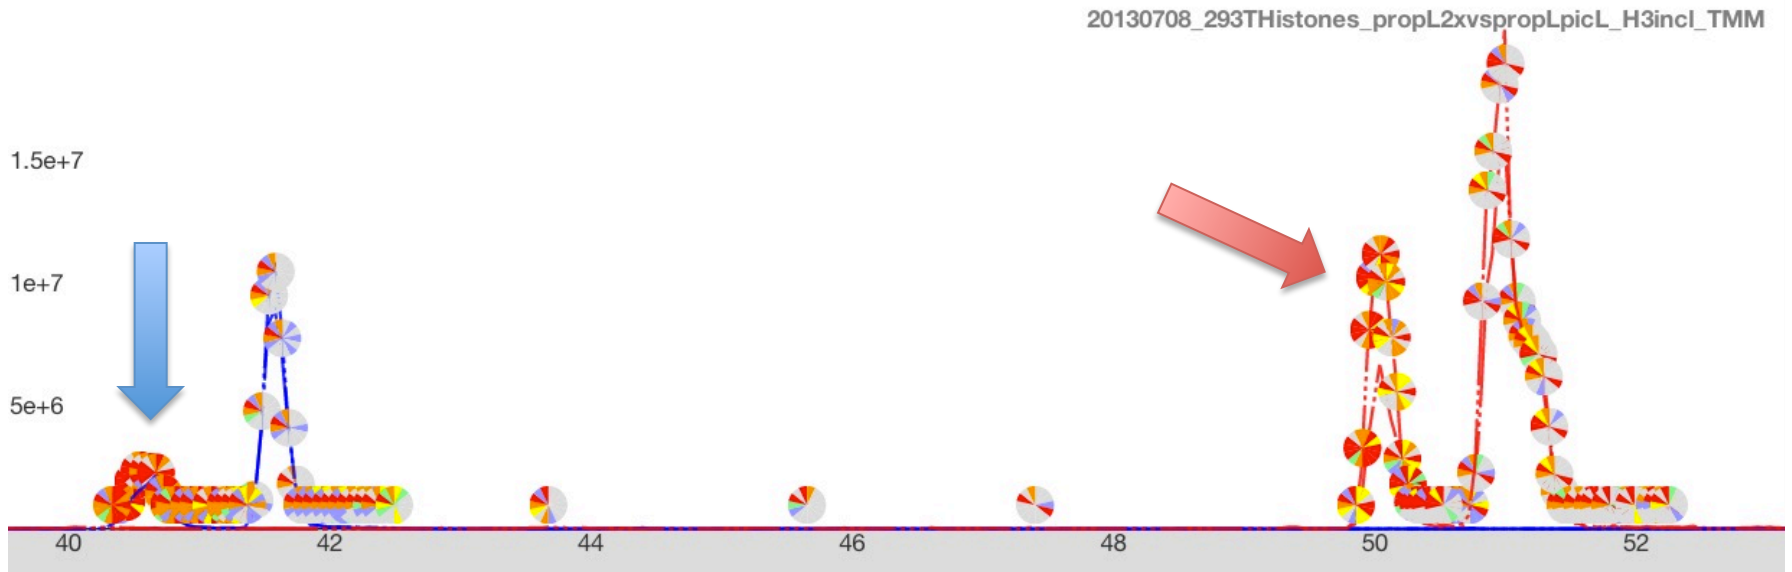



### Quanti event: 39.8-41.4min

| injection                                           | peptide                 | charge | m/z      | auc    |
|-----------------------------------------------------|-------------------------|--------|----------|--------|
| 20130708_293THistones_propL2xvspropLpicL_H3incl_TMM | H3.1K36Me [prop_d0]     | 2      | 836.4807 | 4.0e+7 |
| 20130708_293THistones_propL2xvspropLpicL_H3incl_TMM | H3.1K36Me [pic,prop_d0] | 2      | 867.9861 | 0.0e+0 |
| 20130708_293THistones_propL2xvspropLpicL_H3incl_TMM | H3.1K36Me [prop_d0]     | 3      | 557.9895 | 4.9e+7 |
| 20130708_293THistones_propL2xvspropLpicL_H3incl_TMM | H3.1K36Me [pic,prop_d0] | 3      | 578.9932 | 2.2e+6 |
| 20130708_293THistones_propL2xvspropLpicL_H3incl_TMM | H3.1K36Me [prop_d0]     | 4      | 418.7440 | 2.0e+5 |
| 20130708_293THistones_propL2xvspropLpicL_H3incl_TMM | H3.1K36Me [pic,prop_d0] | 4      | 434.4967 | 0.0e+0 |

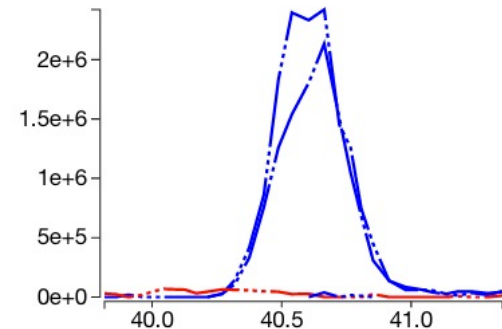

### Quanti event: 49.7-50.6min

| injection                                           | peptide                 | charge | m/z      | auc    |
|-----------------------------------------------------|-------------------------|--------|----------|--------|
| 20130708_293THistones_propL2xvspropLpicL_H3incl_TMM | H3.1K36Me [prop_d0]     | 2      | 836.4807 | 3.3e+4 |
| 20130708_293THistones_propL2xvspropLpicL_H3incl_TMM | H3.1K36Me [pic,prop_d0] | 2      | 867.9861 | 9.4e+7 |
| 20130708_293THistones_propL2xvspropLpicL_H3incl_TMM | H3.1K36Me [prop_d0]     | 3      | 557.9895 | 3.2e+4 |
| 20130708_293THistones_propL2xvspropLpicL_H3incl_TMM | H3.1K36Me [pic,prop_d0] | 3      | 578.9932 | 1.7e+8 |
| 20130708_293THistones_propL2xvspropLpicL_H3incl_TMM | H3.1K36Me [prop_d0]     | 4      | 418.7440 | 0.0e+0 |
| 20130708_293THistones_propL2xvspropLpicL_H3incl_TMM | H3.1K36Me [pic,prop_d0] | 4      | 434.4967 | 0.0e+0 |

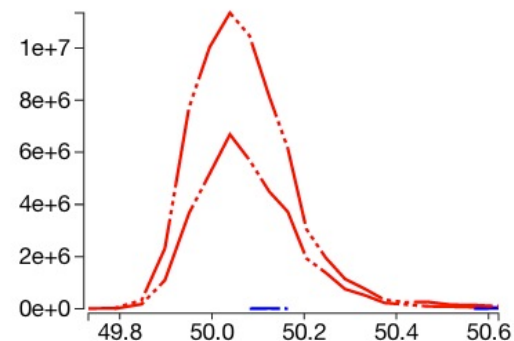

# H3.1\_K27-R40: Prop-KSAPATGGVKMe1KPHR MS/MS

### Experimental spectrum

scan 6882  
 retention time 40.7min  
 precursor m/z 836.4796  
 precursor charge 2+

### Theoretical

M H<sup>2+</sup> 836.4807  
 MH Δ<sub>mass</sub> Da -0.0022  
 MH Δ<sub>mass</sub> ppm -1.3

### edit peptide

{Propionyl}K{Propionyl}SAPATGGVK{Methyl,Propionyl}K{Propionyl}PHR align

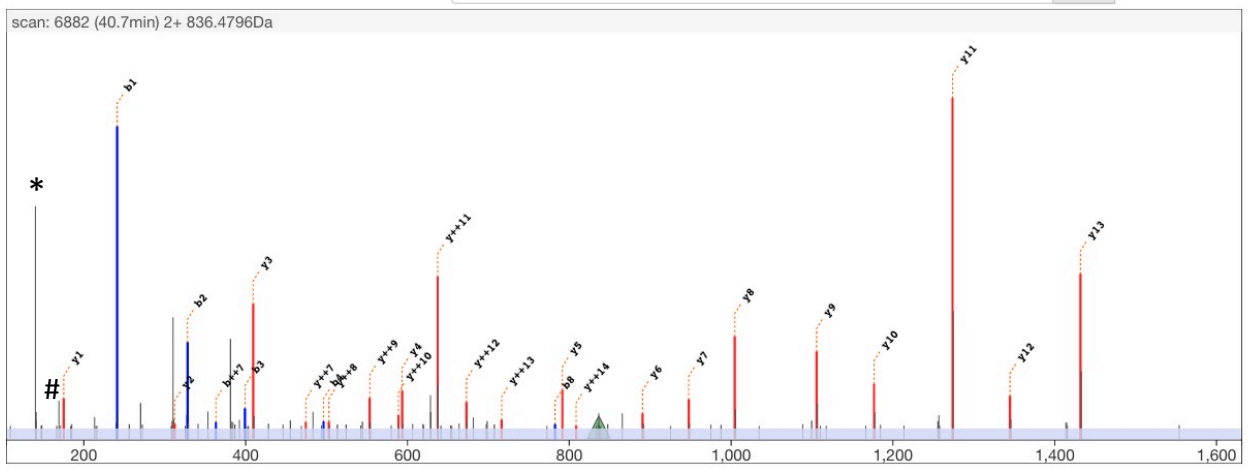

|    | b++    | b       |                    | y       | y++    |    |
|----|--------|---------|--------------------|---------|--------|----|
|    |        |         | Propionyl          | 1615.93 | 808.47 | 14 |
| 1  | 121.08 | 241.15  | K                  | 1431.81 | 716.41 | 13 |
| 2  | 164.60 | 328.19  | S                  | 1344.77 | 672.89 | 12 |
| 3  | 200.12 | 399.22  | A                  | 1273.74 | 637.37 | 11 |
| 4  | 248.64 | 496.28  | P                  | 1176.68 | 588.85 | 10 |
| 5  | 284.16 | 567.31  | A                  | 1105.65 | 553.33 | 9  |
| 6  | 334.68 | 668.36  | T                  | 1004.60 | 502.80 | 8  |
| 7  | 363.20 | 725.38  | G                  | 947.58  | 474.29 | 7  |
| 8  | 391.71 | 782.40  | G                  | 890.56  | 445.78 | 6  |
| 9  | 441.24 | 881.47  | V                  | 791.49  | 396.25 | 5  |
| 10 | 540.31 | 1079.61 | K                  | 593.35  | 297.18 | 4  |
| 11 | 632.37 | 1263.73 | Methyl(Propionyl)K | 409.23  | 205.12 | 3  |
| 12 | 680.90 | 1360.78 | P                  | 312.18  | 156.59 | 2  |
| 13 | 749.42 | 1497.84 | H                  | 175.12  | 88.06  | 1  |
| 14 | 827.48 | 1653.94 | R                  |         |        |    |

\* = 140Da diagnostic ion  
 # = 171Da diagnostic ion

# H3.1\_K27-R40: PIC-KSAPATGGVKMe1KPHR MS/MS

**Experimental spectrum**

scan 9650  
 retention time 50.0min  
 precursor m/z 578.9940  
 precursor charge 3+

**Theoretical**

M H<sup>3+</sup> 578.9932  
 MH Δ<sub>mass</sub> Da 0.0025  
 MH Δ<sub>mass</sub> ppm 1.5

**edit peptide**

{PIC}K{Propionyl}SAPATGGVK{Methyl,Propionyl}K{Propionyl}PHR align

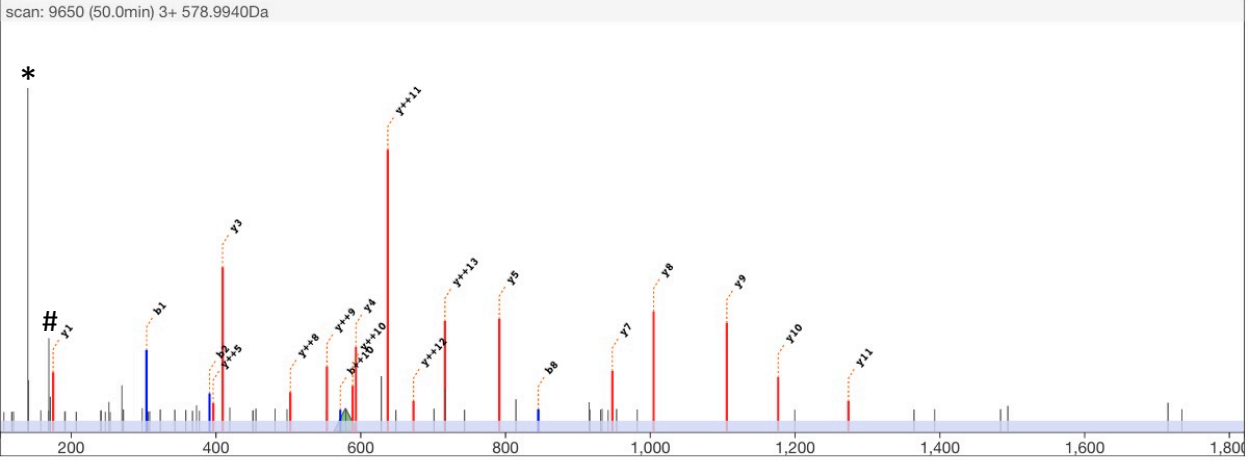

|    | b++    | b       |                  | y       | y++    |    |
|----|--------|---------|------------------|---------|--------|----|
|    | 60.53  | 120.04  | PIC              | 1615.93 | 808.47 | 14 |
| 1  | 152.59 | 304.17  | K                | 1431.81 | 716.41 | 13 |
| 2  | 196.10 | 391.20  | S                | 1344.77 | 672.89 | 12 |
| 3  | 231.62 | 462.23  | A                | 1273.74 | 637.37 | 11 |
| 4  | 280.15 | 559.29  | P                | 1176.68 | 588.85 | 10 |
| 5  | 315.67 | 630.32  | A                | 1105.65 | 553.33 | 9  |
| 6  | 366.19 | 731.37  | T                | 1004.60 | 502.80 | 8  |
| 7  | 394.70 | 788.39  | G                | 947.58  | 474.29 | 7  |
| 8  | 423.21 | 845.42  | V                | 890.56  | 445.78 | 6  |
| 9  | 472.75 | 944.48  | K                | 791.49  | 396.25 | 5  |
| 10 | 571.81 | 1142.62 | Methyl,Propionyl | 593.35  | 297.18 | 4  |
| 11 | 663.87 | 1326.74 | K                | 409.23  | 205.12 | 3  |
| 12 | 712.40 | 1423.79 | P                | 312.18  | 156.59 | 2  |
| 13 | 780.93 | 1560.85 | H                | 175.12  | 88.06  | 1  |
| 14 | 858.98 | 1716.95 | R                |         |        |    |

\* = 140Da diagnostic ion  
 # = 171Da diagnostic ion

# H3.1\_K27-R40:

KSProp?APATProp?GGVKMe1KPHR

No MS2 detected for Prop-labeling. S28-prop MS2s shown.

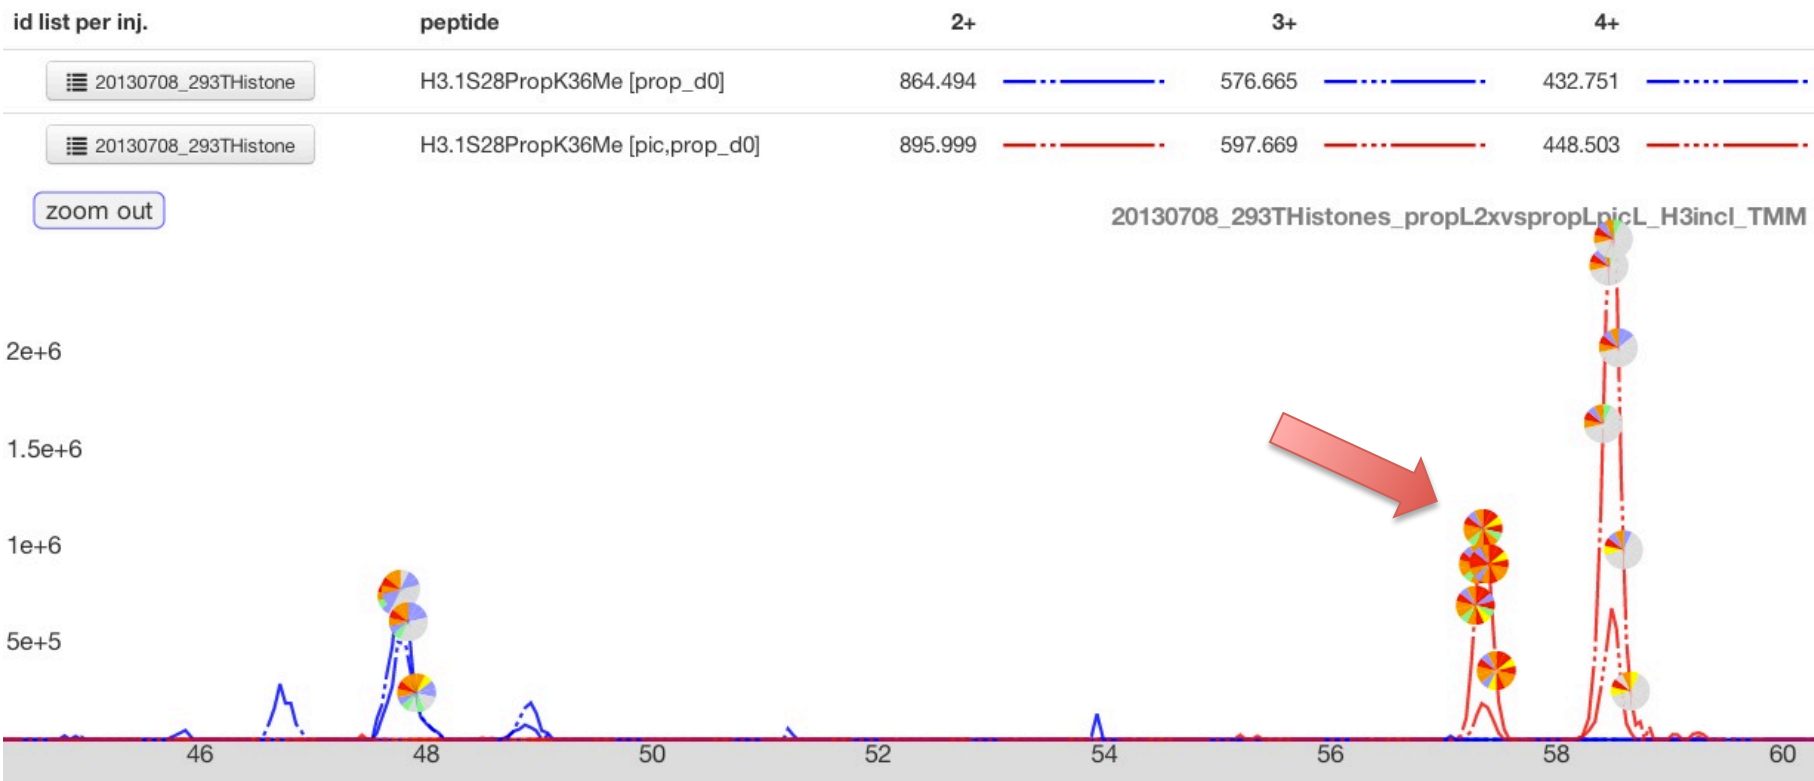

Quanti event: 56.4-57.9min

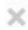

| injection                                           | peptide                        | charge | m/z      | auc    |
|-----------------------------------------------------|--------------------------------|--------|----------|--------|
| 20130708_293THistones_propL2xvspropLpicL_H3incl_TMM | H3.1S28PropK36Me [prop_d0]     | 2      | 864.4938 | 4.6e+4 |
| 20130708_293THistones_propL2xvspropLpicL_H3incl_TMM | H3.1S28PropK36Me [pic,prop_d0] | 2      | 895.9992 | 1.2e+7 |
| 20130708_293THistones_propL2xvspropLpicL_H3incl_TMM | H3.1S28PropK36Me [prop_d0]     | 3      | 576.6649 | 0.0e+0 |
| 20130708_293THistones_propL2xvspropLpicL_H3incl_TMM | H3.1S28PropK36Me [pic,prop_d0] | 3      | 597.6686 | 1.9e+6 |
| 20130708_293THistones_propL2xvspropLpicL_H3incl_TMM | H3.1S28PropK36Me [prop_d0]     | 4      | 432.7505 | 0.0e+0 |
| 20130708_293THistones_propL2xvspropLpicL_H3incl_TMM | H3.1S28PropK36Me [pic,prop_d0] | 4      | 448.5033 | 0.0e+0 |

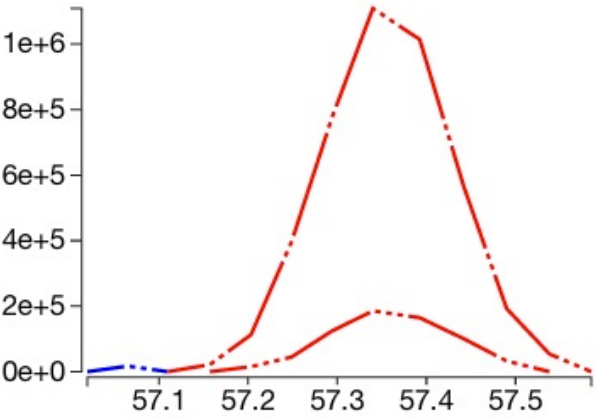

No MS2 detected for Prop-labeling.

**Experimental spectrum**

scan 12036  
 retention time 57.4min  
 precursor m/z 895.9990  
 precursor charge 2+

**Theoretical**

M H<sup>2+</sup> 895.9992  
 MH Δ<sub>mass</sub> Da -0.0005  
 MH Δ<sub>mass</sub> ppm -0.3

**edit peptide**

{PIC}K{Propionyl}S{Propionyl}APATGGVK{Methyl,Propionyl}K{Propionyl}PHR align

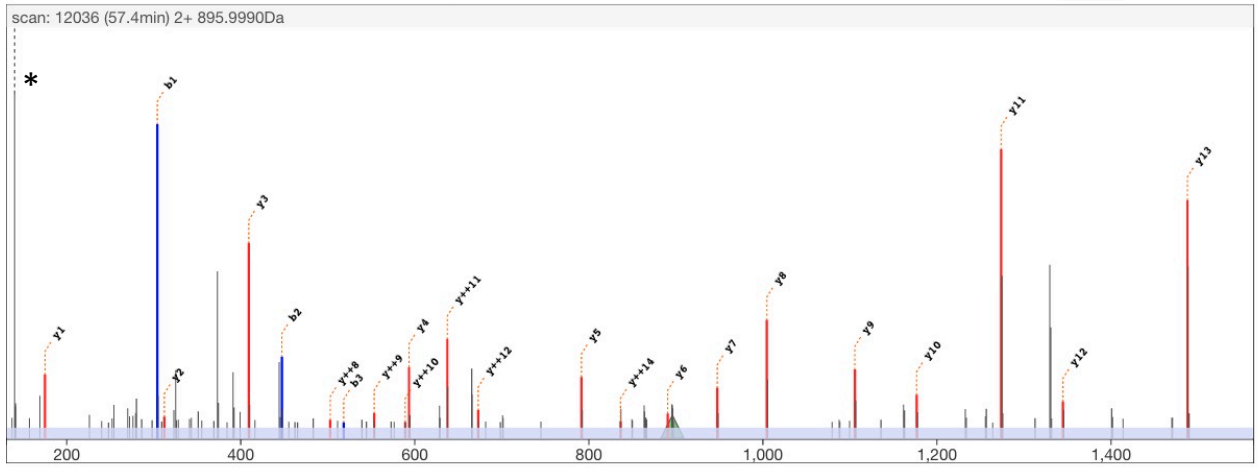

|    | b++    | b       |                  | y       | y++    |    |
|----|--------|---------|------------------|---------|--------|----|
|    | 60.53  | 120.04  | PIC              | 1671.95 | 836.48 | 14 |
| 1  | 152.59 | 304.17  | K                | 1487.83 | 744.42 | 13 |
| 2  | 224.12 | 447.22  | S                | 1344.77 | 672.89 | 12 |
| 3  | 259.63 | 518.26  | A                | 1273.74 | 637.37 | 11 |
| 4  | 308.16 | 615.31  | P                | 1176.68 | 588.85 | 10 |
| 5  | 343.68 | 686.35  | A                | 1105.65 | 553.33 | 9  |
| 6  | 394.20 | 787.40  | T                | 1004.60 | 502.80 | 8  |
| 7  | 422.71 | 844.42  | G                | 947.58  | 474.29 | 7  |
| 8  | 451.22 | 901.44  | V                | 890.56  | 445.78 | 6  |
| 9  | 500.76 | 1000.51 | K                | 791.49  | 396.25 | 5  |
| 10 | 599.83 | 1198.65 | Methyl,Propionyl | 593.35  | 297.18 | 4  |
| 11 | 691.89 | 1382.77 | K                | 409.23  | 205.12 | 3  |
| 12 | 740.41 | 1479.82 | P                | 312.18  | 156.59 | 2  |
| 13 | 808.94 | 1616.88 | H                | 175.12  | 88.06  | 1  |
| 14 | 886.99 | 1772.98 | R                |         |        |    |

\* = 140Da diagnostic ion

# H3.1\_K27-R40:

## KSAPATGGVKMe2KPHR

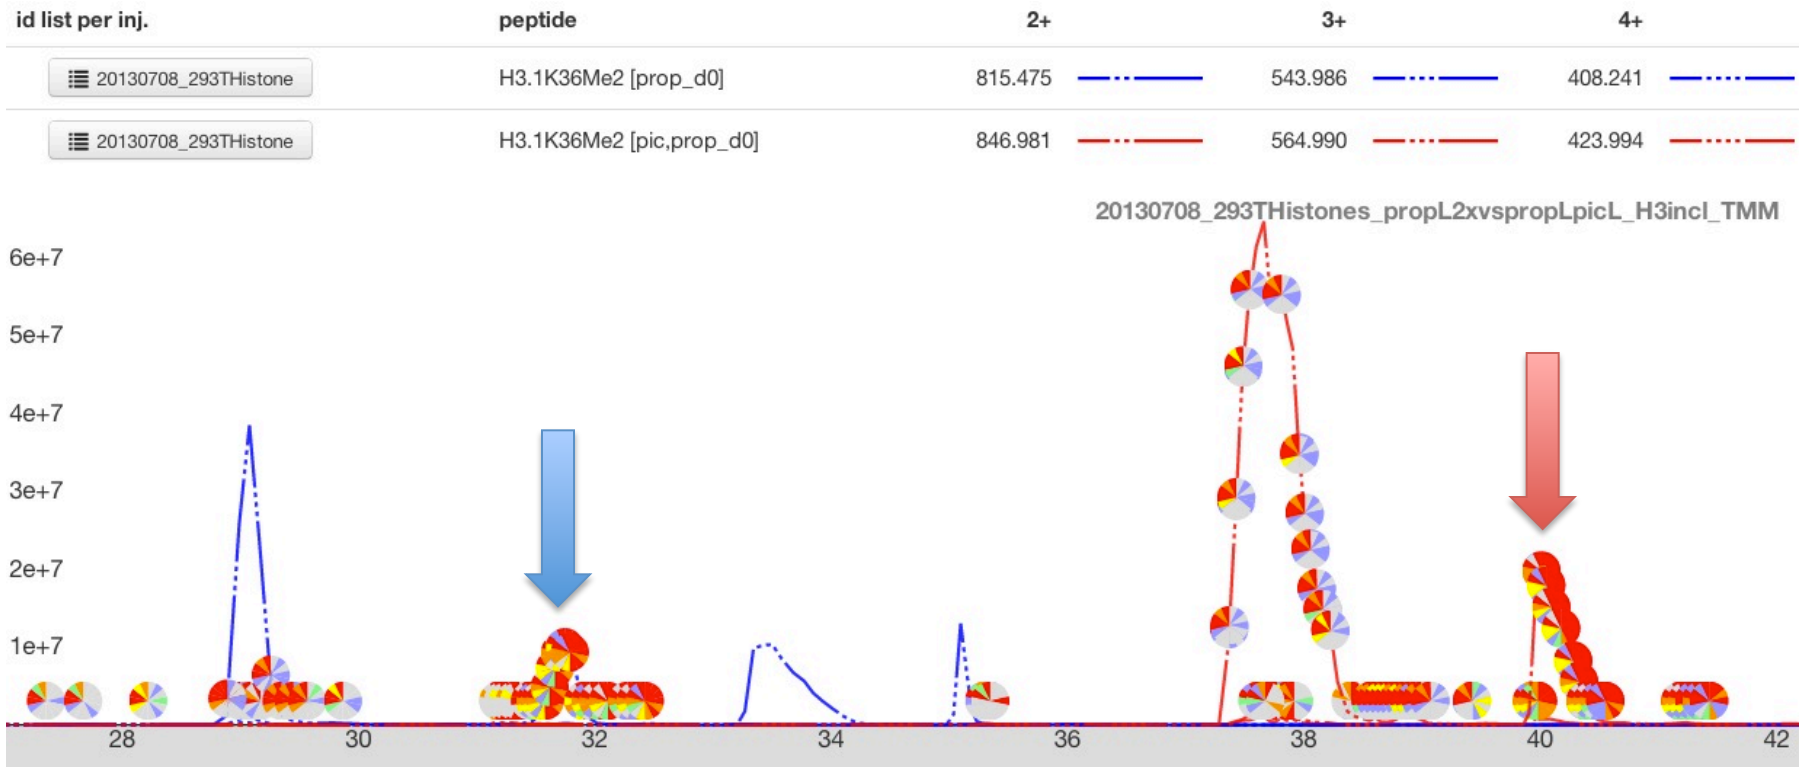

Quanti event: 30.6-32.8min

| injection                                           | peptide                  | charge | m/z      | auc    |
|-----------------------------------------------------|--------------------------|--------|----------|--------|
| 20130708_293THistones_propL2xvspropLpicL_H3incl_TMM | H3.1K36Me2 [prop_d0]     | 2      | 815.4754 | 2.4e+6 |
| 20130708_293THistones_propL2xvspropLpicL_H3incl_TMM | H3.1K36Me2 [pic,prop_d0] | 2      | 846.9808 | 0.0e+0 |
| 20130708_293THistones_propL2xvspropLpicL_H3incl_TMM | H3.1K36Me2 [prop_d0]     | 3      | 543.9860 | 1.6e+8 |
| 20130708_293THistones_propL2xvspropLpicL_H3incl_TMM | H3.1K36Me2 [pic,prop_d0] | 3      | 564.9897 | 1.1e+6 |
| 20130708_293THistones_propL2xvspropLpicL_H3incl_TMM | H3.1K36Me2 [prop_d0]     | 4      | 408.2413 | 4.7e+5 |
| 20130708_293THistones_propL2xvspropLpicL_H3incl_TMM | H3.1K36Me2 [pic,prop_d0] | 4      | 423.9941 | 8.9e+6 |

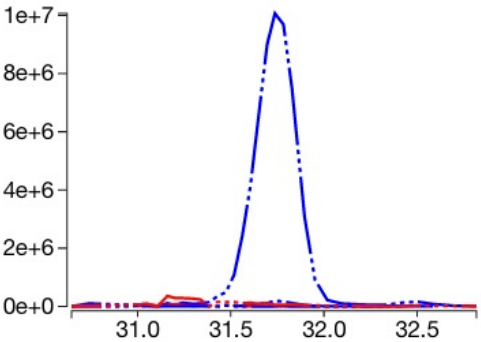

Quanti event: 39.7-41.6min

| injection                                           | peptide                  | charge | m/z      | auc    |
|-----------------------------------------------------|--------------------------|--------|----------|--------|
| 20130708_293THistones_propL2xvspropLpicL_H3incl_TMM | H3.1K36Me2 [prop_d0]     | 2      | 815.4754 | 1.7e+4 |
| 20130708_293THistones_propL2xvspropLpicL_H3incl_TMM | H3.1K36Me2 [pic,prop_d0] | 2      | 846.9808 | 1.4e+7 |
| 20130708_293THistones_propL2xvspropLpicL_H3incl_TMM | H3.1K36Me2 [prop_d0]     | 3      | 543.9860 | 2.1e+5 |
| 20130708_293THistones_propL2xvspropLpicL_H3incl_TMM | H3.1K36Me2 [pic,prop_d0] | 3      | 564.9897 | 3.6e+8 |
| 20130708_293THistones_propL2xvspropLpicL_H3incl_TMM | H3.1K36Me2 [prop_d0]     | 4      | 408.2413 | 9.0e+3 |
| 20130708_293THistones_propL2xvspropLpicL_H3incl_TMM | H3.1K36Me2 [pic,prop_d0] | 4      | 423.9941 | 8.0e+5 |

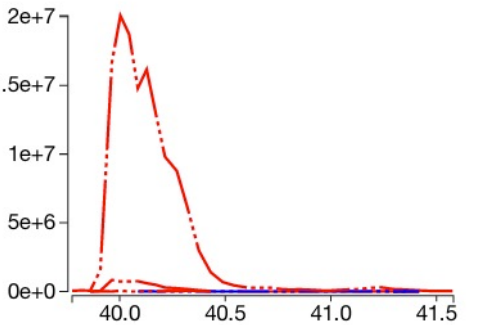



# H3.1\_K27-R40: Prop-KSAPATGGVKMe2KPHR MS/MS

### Experimental spectrum

scan 4677  
 retention time 32.0min  
 precursor m/z 543.9854  
 precursor charge 3+

### Theoretical

M H<sup>3+</sup> 543.9860  
 MH Δ<sub>mass</sub> Da -0.0018  
 MH Δ<sub>mass</sub> ppm -1.1

### edit peptide

{Propionyl}K{Propionyl}SAPATGGVK{Dimethyl}K{Propionyl}PHR

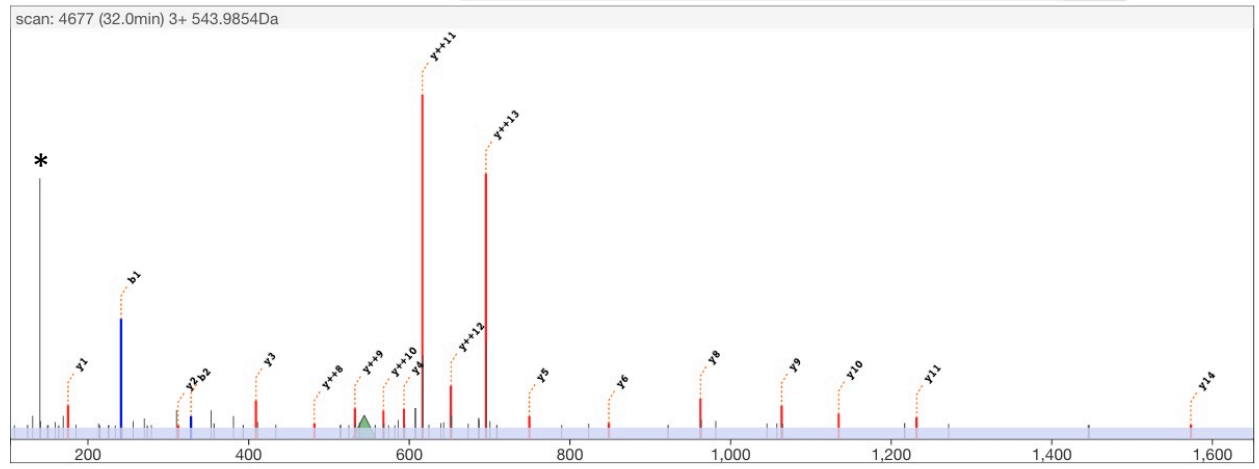

|    | b++    | b       | y       | y++    |    |
|----|--------|---------|---------|--------|----|
|    |        |         | 1573.92 | 787.46 | 14 |
| 1  | 121.08 | 241.15  | 1389.80 | 695.40 | 13 |
| 2  | 164.60 | 328.19  | 1302.76 | 651.89 | 12 |
| 3  | 200.12 | 399.22  | 1231.73 | 616.37 | 11 |
| 4  | 248.64 | 496.28  | 1134.67 | 567.84 | 10 |
| 5  | 284.16 | 567.31  | 1063.64 | 532.32 | 9  |
| 6  | 334.68 | 668.36  | 962.59  | 481.80 | 8  |
| 7  | 363.20 | 725.38  | 905.57  | 453.29 | 7  |
| 8  | 391.71 | 782.40  | 848.55  | 424.78 | 6  |
| 9  | 441.24 | 881.47  | 749.48  | 375.24 | 5  |
| 10 | 519.30 | 1037.60 | 593.35  | 297.18 | 4  |
| 11 | 611.36 | 1221.72 | 409.23  | 205.12 | 3  |
| 12 | 659.89 | 1318.77 | 312.18  | 156.59 | 2  |
| 13 | 728.42 | 1455.83 | 175.12  | 88.06  | 1  |
| 14 | 806.47 | 1611.93 |         |        |    |

\* = 140Da diagnostic ion

# H3.1\_K27-R40: PIC-KSAPATGGVKMe2KPHR MS/MS

### Experimental spectrum

scan 6674  
retention time 40.1min  
precursor m/z 564.9891  
precursor charge 3+

### Theoretical

MH<sup>3+</sup> 564.9897  
MH Δ<sub>mass</sub> Da -0.0015  
MH Δ<sub>mass</sub> ppm -0.9

### edit peptide

{PIC}K{Propionyl}SAPATGGVK{Dimethyl}K{Propionyl}PHR align

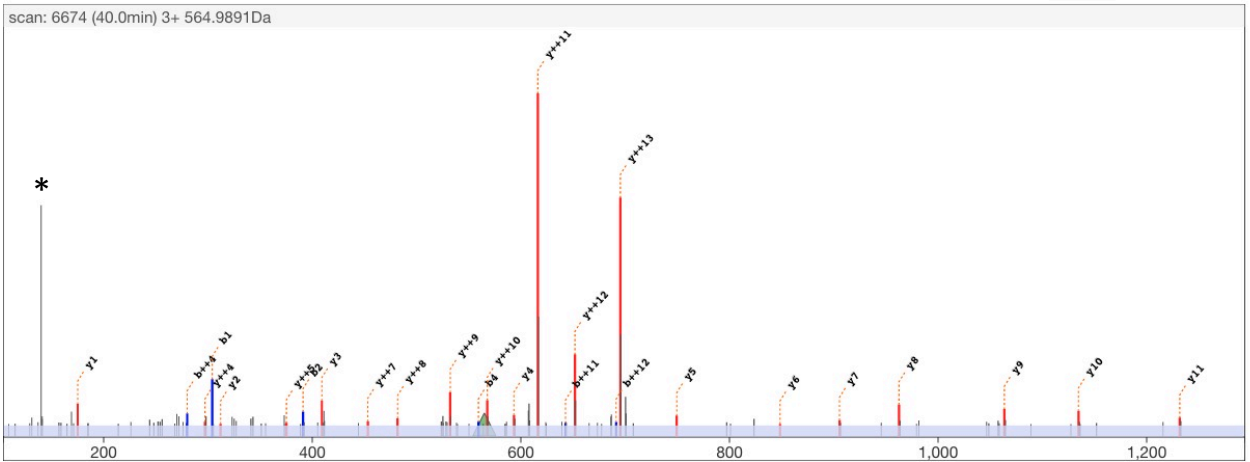

|    | b++    | b       |           | y       | y++    |    |
|----|--------|---------|-----------|---------|--------|----|
|    | 60.53  | 120.04  |           | 1573.92 | 787.46 | 14 |
| 1  | 152.59 | 304.17  | PIC       | 1389.80 | 695.40 | 13 |
| 2  | 196.10 | 391.20  | Propionyl | 1302.76 | 651.89 | 12 |
| 3  | 231.62 | 462.23  | S         | 1231.73 | 616.37 | 11 |
| 4  | 280.15 | 559.29  | A         | 1134.67 | 567.84 | 10 |
| 5  | 315.67 | 630.32  | P         | 1063.64 | 532.32 | 9  |
| 6  | 366.19 | 731.37  | A         | 962.59  | 481.80 | 8  |
| 7  | 394.70 | 788.39  | T         | 905.57  | 453.29 | 7  |
| 8  | 423.21 | 845.42  | G         | 848.55  | 424.78 | 6  |
| 9  | 472.75 | 944.48  | V         | 749.48  | 375.24 | 5  |
| 10 | 550.81 | 1100.61 | K         | 593.35  | 297.18 | 4  |
| 11 | 642.87 | 1284.73 | Dimethyl  | 409.23  | 205.12 | 3  |
| 12 | 691.40 | 1381.78 | Propionyl | 312.18  | 156.59 | 2  |
| 13 | 759.93 | 1518.84 | P         | 175.12  | 88.06  | 1  |
| 14 | 837.98 | 1674.94 | H         |         |        |    |
|    |        |         | R         |         |        |    |

\* = 140Da diagnostic ion

# H3.1\_K27-R40:

KS**Prop**APATGGVK**Me2**KPHR

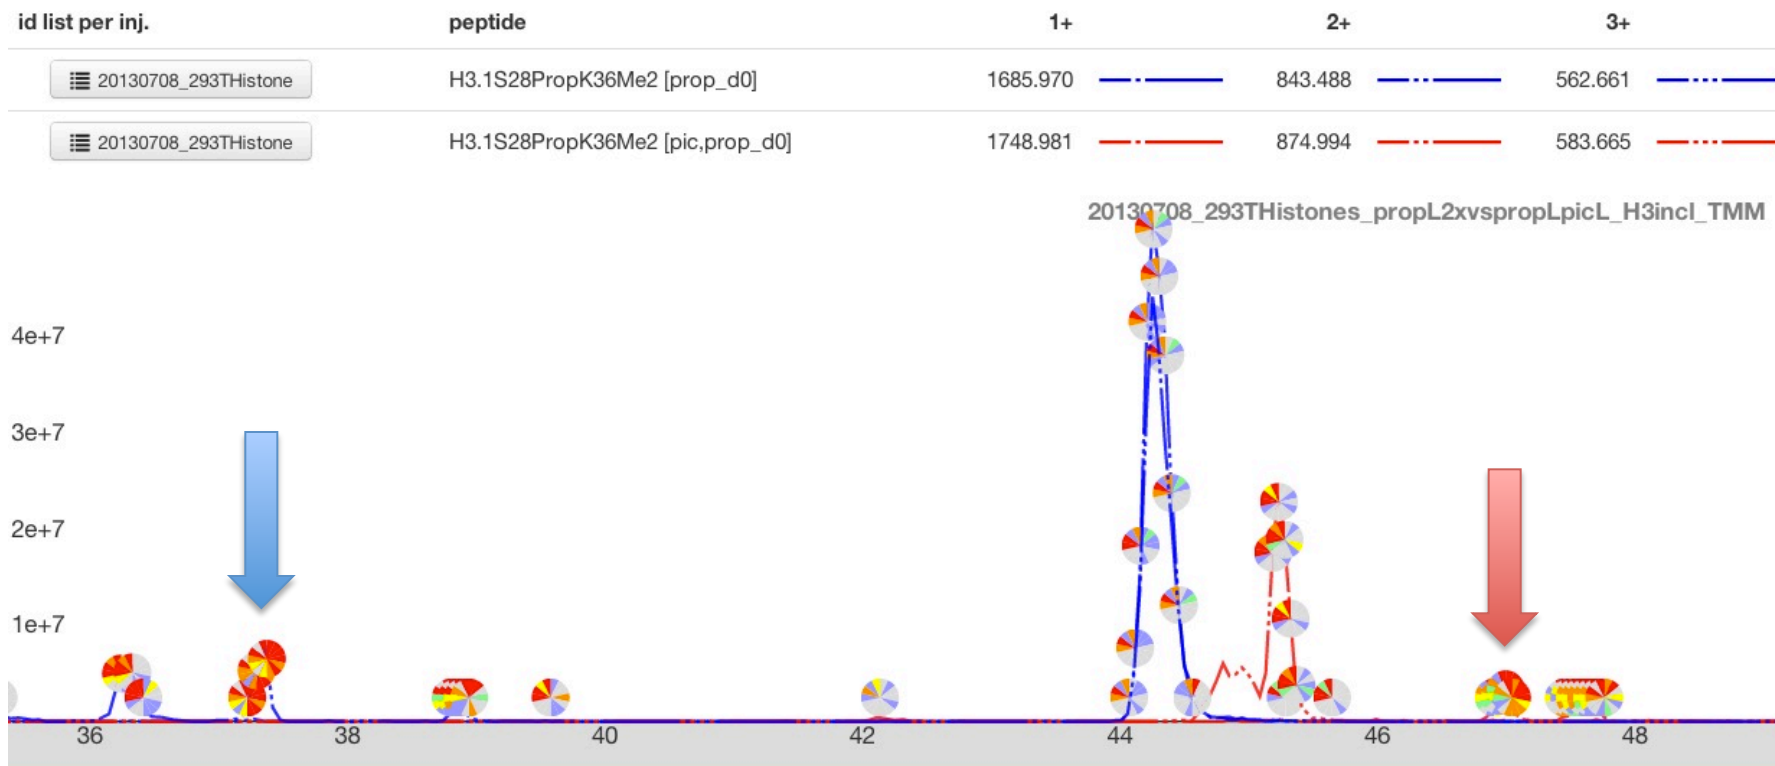

### Quanti event: 36.9-37.6min

| injection                                           | peptide                            | charge | m/z       | auc    |
|-----------------------------------------------------|------------------------------------|--------|-----------|--------|
| 20130708_293THistones_propL2xvspropLpicL_H3incl_TMM | H3.1S28PropK36Me2<br>[prop_d0]     | 1      | 1685.9697 | 0.0e+0 |
| 20130708_293THistones_propL2xvspropLpicL_H3incl_TMM | H3.1S28PropK36Me2<br>[pic,prop_d0] | 1      | 1748.9806 | 0.0e+0 |
| 20130708_293THistones_propL2xvspropLpicL_H3incl_TMM | H3.1S28PropK36Me2<br>[prop_d0]     | 2      | 843.4885  | 2.7e+5 |
| 20130708_293THistones_propL2xvspropLpicL_H3incl_TMM | H3.1S28PropK36Me2<br>[pic,prop_d0] | 2      | 874.9939  | 0.0e+0 |
| 20130708_293THistones_propL2xvspropLpicL_H3incl_TMM | H3.1S28PropK36Me2<br>[prop_d0]     | 3      | 562.6614  | 1.2e+7 |
| 20130708_293THistones_propL2xvspropLpicL_H3incl_TMM | H3.1S28PropK36Me2<br>[pic,prop_d0] | 3      | 583.6651  | 0.0e+0 |

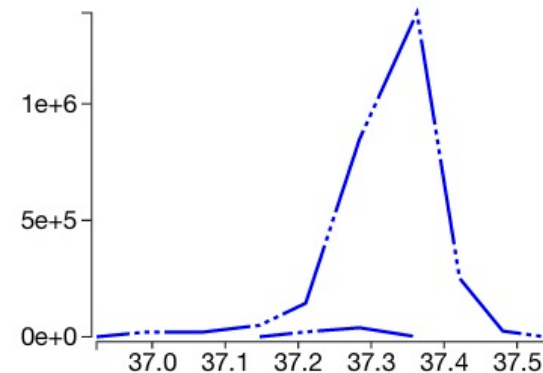

### Quanti event: 46.7-47.3min

| injection                                           | peptide                            | charge | m/z       | auc    |
|-----------------------------------------------------|------------------------------------|--------|-----------|--------|
| 20130708_293THistones_propL2xvspropLpicL_H3incl_TMM | H3.1S28PropK36Me2<br>[prop_d0]     | 1      | 1685.9697 | 0.0e+0 |
| 20130708_293THistones_propL2xvspropLpicL_H3incl_TMM | H3.1S28PropK36Me2<br>[pic,prop_d0] | 1      | 1748.9806 | 0.0e+0 |
| 20130708_293THistones_propL2xvspropLpicL_H3incl_TMM | H3.1S28PropK36Me2<br>[prop_d0]     | 2      | 843.4885  | 0.0e+0 |
| 20130708_293THistones_propL2xvspropLpicL_H3incl_TMM | H3.1S28PropK36Me2<br>[pic,prop_d0] | 2      | 874.9939  | 1.3e+5 |
| 20130708_293THistones_propL2xvspropLpicL_H3incl_TMM | H3.1S28PropK36Me2<br>[prop_d0]     | 3      | 562.6614  | 0.0e+0 |
| 20130708_293THistones_propL2xvspropLpicL_H3incl_TMM | H3.1S28PropK36Me2<br>[pic,prop_d0] | 3      | 583.6651  | 5.5e+6 |

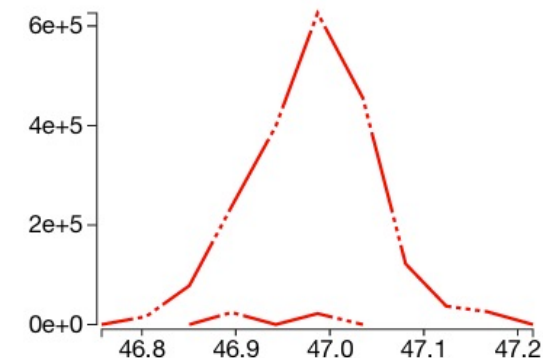

**Experimental spectrum**

scan 5909  
 retention time 37.4min  
 precursor m/z 562.6615  
 precursor charge 3+

**Theoretical**

M H<sup>3+</sup> 562.6614  
 MH Δ<sub>mass</sub> Da 0.0002  
 MH Δ<sub>mass</sub> ppm 0.1

**edit peptide**

{Propionyl}K{Propionyl}S{Propionyl}APATGGVK{Dimethyl}K{Propionyl}PHR align

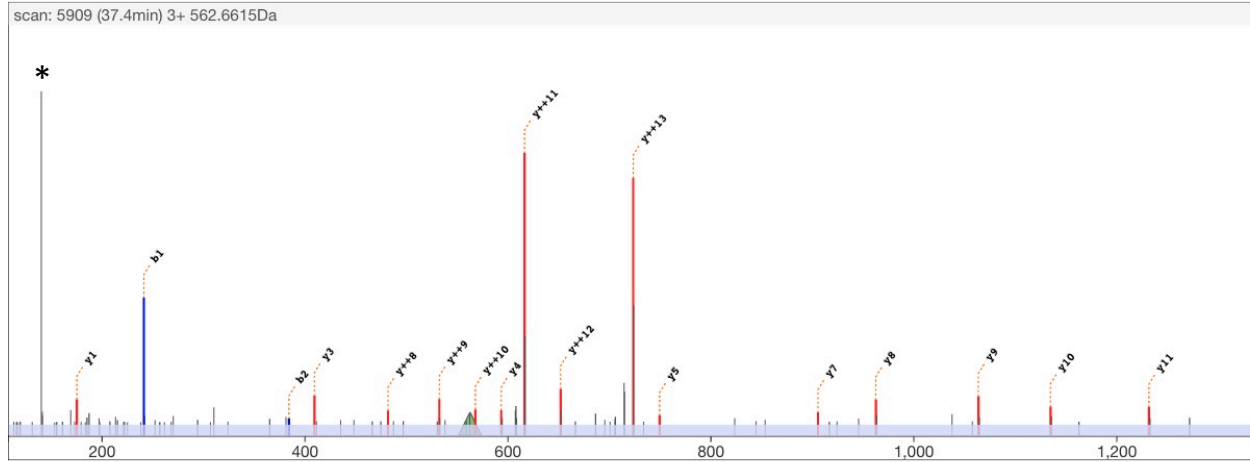

|    | b++    | b       | y       | y++    |    |
|----|--------|---------|---------|--------|----|
|    |        |         | 1629.94 | 815.48 | 14 |
| 1  | 121.08 | 241.15  | 1445.82 | 723.41 | 13 |
| 2  | 192.61 | 384.21  | 1302.76 | 651.89 | 12 |
| 3  | 228.13 | 455.25  | 1231.73 | 616.37 | 11 |
| 4  | 276.66 | 552.30  | 1134.67 | 567.84 | 10 |
| 5  | 312.17 | 623.34  | 1063.64 | 532.32 | 9  |
| 6  | 362.70 | 724.39  | 962.59  | 481.80 | 8  |
| 7  | 391.21 | 781.41  | 905.57  | 453.29 | 7  |
| 8  | 419.72 | 838.43  | 848.55  | 424.78 | 6  |
| 9  | 469.25 | 937.50  | 749.48  | 375.24 | 5  |
| 10 | 547.32 | 1093.63 | 593.35  | 297.18 | 4  |
| 11 | 639.38 | 1277.75 | 409.23  | 205.12 | 3  |
| 12 | 687.90 | 1374.80 | 312.18  | 156.59 | 2  |
| 13 | 756.43 | 1511.86 | 175.12  | 88.06  | 1  |
| 14 | 834.48 | 1667.96 |         |        |    |

\* = 140Da diagnostic ion

# H3.1\_K27-R40: PIC-KSPropAPATGGVKMe2KPHR MS/MS

### Experimental spectrum

scan 8756  
 retention time 47.0min  
 precursor m/z 583.6631  
 precursor charge 3+

### Theoretical

M H<sup>3+</sup> 583.6651  
 MH Δ<sub>mass</sub> Da -0.0057  
 MH Δ<sub>mass</sub> ppm -3.3

### edit peptide

{PIC}K{Propionyl}S{Propionyl}APATGGVK{Dimethyl}K{Propionyl}PHR

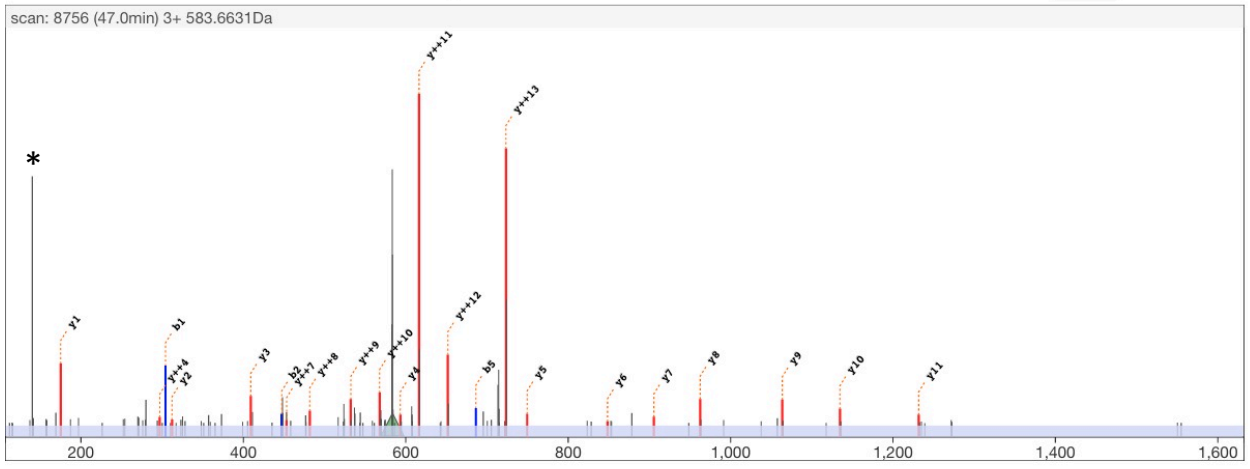

\* = 140Da diagnostic ion

|    | b++    | b       |           | y       | y++    |    |
|----|--------|---------|-----------|---------|--------|----|
|    | 60.53  | 120.04  | PIC       | 1629.94 | 815.48 | 14 |
| 1  | 152.59 | 304.17  | K         | 1445.82 | 723.41 | 13 |
| 2  | 224.12 | 447.22  | S         | 1302.76 | 651.89 | 12 |
| 3  | 259.63 | 518.26  | Propionyl | 1231.73 | 616.37 | 11 |
| 4  | 308.16 | 615.31  | A         | 1134.67 | 567.84 | 10 |
| 5  | 343.68 | 686.35  | P         | 1063.64 | 532.32 | 9  |
| 6  | 394.20 | 787.40  | A         | 962.59  | 481.80 | 8  |
| 7  | 422.71 | 844.42  | T         | 905.57  | 453.29 | 7  |
| 8  | 451.22 | 901.44  | G         | 848.55  | 424.78 | 6  |
| 9  | 500.76 | 1000.51 | V         | 749.48  | 375.24 | 5  |
| 10 | 578.82 | 1156.64 | K         | 593.35  | 297.18 | 4  |
| 11 | 670.88 | 1340.76 | Dimethyl  | 409.23  | 205.12 | 3  |
| 12 | 719.41 | 1437.81 | K         | 312.18  | 156.59 | 2  |
| 13 | 787.94 | 1574.87 | Propionyl | 175.12  | 88.06  | 1  |
| 14 | 865.99 | 1730.97 | P         |         |        |    |
|    |        |         | H         |         |        |    |
|    |        |         | R         |         |        |    |

# H3.1\_K27-R40:

## KSAPATPropGGVKMe2KPHR

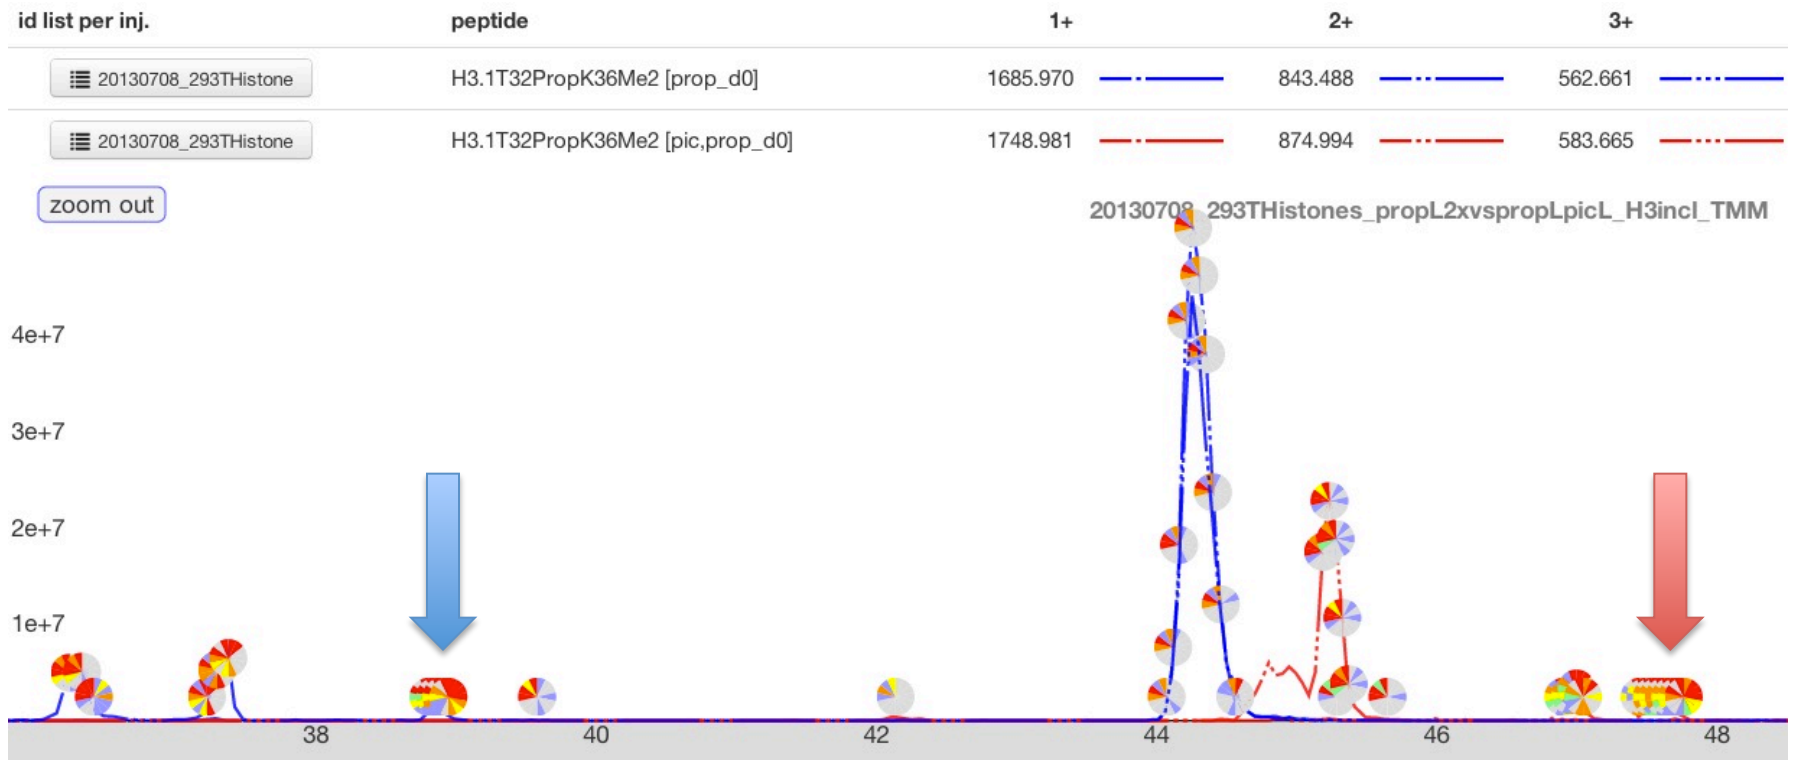

### Quanti event: 38.7-39.2min

| injection                                           | peptide                            | charge | m/z       | auc    |
|-----------------------------------------------------|------------------------------------|--------|-----------|--------|
| 20130708_293THistones_propL2xvspropLpicL_H3incl_TMM | H3.1T32PropK36Me2<br>[prop_d0]     | 1      | 1685.9697 | 0.0e+0 |
| 20130708_293THistones_propL2xvspropLpicL_H3incl_TMM | H3.1T32PropK36Me2<br>[pic,prop_d0] | 1      | 1748.9806 | 0.0e+0 |
| 20130708_293THistones_propL2xvspropLpicL_H3incl_TMM | H3.1T32PropK36Me2<br>[prop_d0]     | 2      | 843.4885  | 0.0e+0 |
| 20130708_293THistones_propL2xvspropLpicL_H3incl_TMM | H3.1T32PropK36Me2<br>[pic,prop_d0] | 2      | 874.9939  | 0.0e+0 |
| 20130708_293THistones_propL2xvspropLpicL_H3incl_TMM | H3.1T32PropK36Me2<br>[prop_d0]     | 3      | 562.6614  | 2.3e+6 |
| 20130708_293THistones_propL2xvspropLpicL_H3incl_TMM | H3.1T32PropK36Me2<br>[pic,prop_d0] | 3      | 583.6651  | 4.2e+4 |

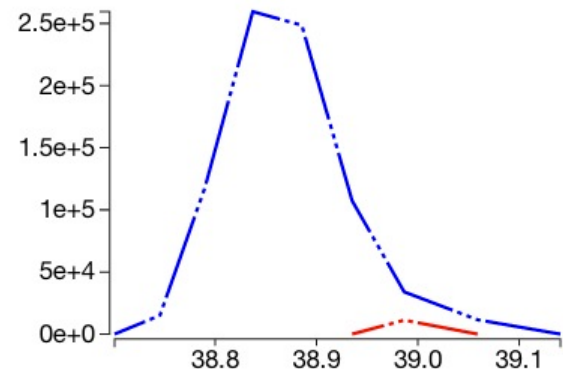

### Quanti event: 47.3-47.9min

| injection                                           | peptide                            | charge | m/z       | auc    |
|-----------------------------------------------------|------------------------------------|--------|-----------|--------|
| 20130708_293THistones_propL2xvspropLpicL_H3incl_TMM | H3.1T32PropK36Me2<br>[prop_d0]     | 1      | 1685.9697 | 0.0e+0 |
| 20130708_293THistones_propL2xvspropLpicL_H3incl_TMM | H3.1T32PropK36Me2<br>[pic,prop_d0] | 1      | 1748.9806 | 0.0e+0 |
| 20130708_293THistones_propL2xvspropLpicL_H3incl_TMM | H3.1T32PropK36Me2<br>[prop_d0]     | 2      | 843.4885  | 0.0e+0 |
| 20130708_293THistones_propL2xvspropLpicL_H3incl_TMM | H3.1T32PropK36Me2<br>[pic,prop_d0] | 2      | 874.9939  | 9.5e+4 |
| 20130708_293THistones_propL2xvspropLpicL_H3incl_TMM | H3.1T32PropK36Me2<br>[prop_d0]     | 3      | 562.6614  | 0.0e+0 |
| 20130708_293THistones_propL2xvspropLpicL_H3incl_TMM | H3.1T32PropK36Me2<br>[pic,prop_d0] | 3      | 583.6651  | 3.5e+6 |

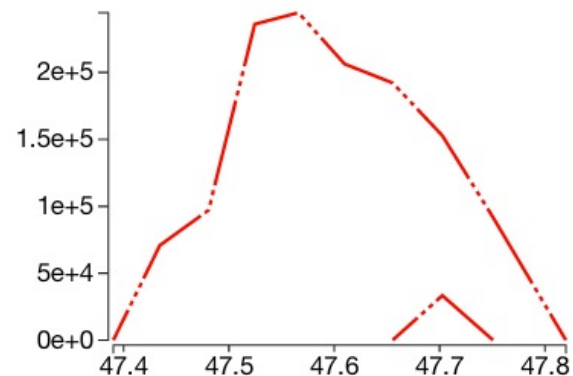



# H3.1\_K27-R40: Prop-KSAPATPropGGVKMe2KPHR MS/MS

### Experimental spectrum

scan 6356  
 retention time 38.9min  
 precursor m/z 562.6605  
 precursor charge 3+

### Theoretical

M H<sup>3+</sup> 562.6614  
 MH  $\Delta_{mass}$  Da -0.0027  
 MH  $\Delta_{mass}$  ppm -1.6

### edit peptide

{Propionyl}K{Propionyl}SAPAT{Propionyl}GGVK{Dimethyl}K{Propionyl}PHR align

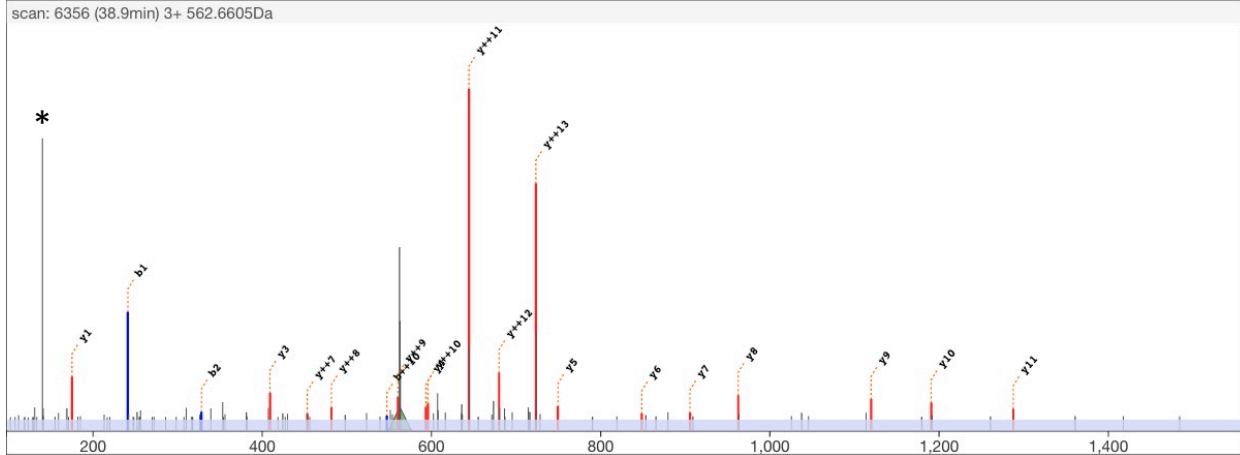

|    | b++    | b       |           | y       | y++    |    |
|----|--------|---------|-----------|---------|--------|----|
|    |        |         | Propionyl | 1629.94 | 815.48 | 14 |
| 1  | 121.08 | 241.15  | K         |         |        |    |
|    |        |         | Propionyl | 1445.82 | 723.41 | 13 |
| 2  | 164.60 | 328.19  | S         |         |        |    |
|    |        |         | A         | 1358.79 | 679.90 | 12 |
| 3  | 200.12 | 399.22  | P         | 1287.75 | 644.38 | 11 |
|    |        |         | A         | 1190.70 | 595.85 | 10 |
| 4  | 248.64 | 496.28  | T         | 1119.66 | 560.34 | 9  |
| 5  | 284.16 | 567.31  | G         |         |        |    |
|    |        |         | Propionyl | 962.59  | 481.80 | 8  |
| 6  | 362.70 | 724.39  | V         |         |        |    |
| 7  | 391.21 | 781.41  | G         | 905.57  | 453.29 | 7  |
| 8  | 419.72 | 838.43  | V         | 848.55  | 424.78 | 6  |
| 9  | 469.25 | 937.50  | K         |         |        |    |
|    |        |         | Dimethyl  | 749.48  | 375.24 | 5  |
| 10 | 547.32 | 1093.63 | K         | 593.35  | 297.18 | 4  |
| 11 | 639.38 | 1277.75 | Propionyl | 409.23  | 205.12 | 3  |
| 12 | 687.90 | 1374.80 | P         |         |        |    |
|    |        |         | H         | 312.18  | 156.59 | 2  |
| 13 | 756.43 | 1511.86 | R         | 175.12  | 88.06  | 1  |
| 14 | 834.48 | 1667.96 |           |         |        |    |

\* = 140Da diagnostic ion

# H3.1\_K27-R40: PIC-KSAPATPropGGVKMe2KPHR MS/MS

### Experimental spectrum

scan 8964  
 retention time 47.6min  
 precursor m/z 583.6627  
 precursor charge 3+

### Theoretical

M H<sup>3+</sup> 583.6651  
 MH Δ<sub>mass</sub> Da -0.0070  
 MH Δ<sub>mass</sub> ppm -4.0

### edit peptide

(PIC)K(Propionyl)SAPAT(Propionyl)GGVK(Dimethyl)K(Propionyl)PHR

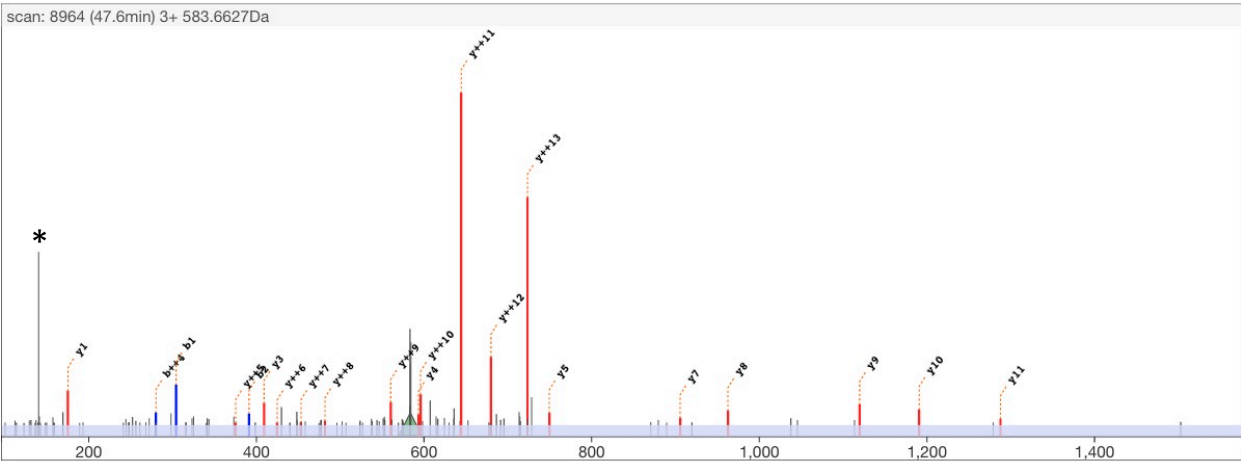

|    | b++    | b       |     | y       | y++    |    |
|----|--------|---------|-----|---------|--------|----|
|    | 60.53  | 120.04  | PIC | 1629.94 | 815.48 | 14 |
| 1  | 152.59 | 304.17  | K   | 1445.82 | 723.41 | 13 |
| 2  | 196.10 | 391.20  | S   | 1358.79 | 679.90 | 12 |
| 3  | 231.62 | 462.23  | A   | 1287.75 | 644.38 | 11 |
| 4  | 280.15 | 559.29  | P   | 1190.70 | 595.85 | 10 |
| 5  | 315.67 | 630.32  | A   | 1119.66 | 560.34 | 9  |
| 6  | 394.20 | 787.40  | T   | 962.59  | 481.80 | 8  |
| 7  | 422.71 | 844.42  | G   | 905.57  | 453.29 | 7  |
| 8  | 451.22 | 901.44  | G   | 848.55  | 424.78 | 6  |
| 9  | 500.76 | 1000.51 | V   | 749.48  | 375.24 | 5  |
| 10 | 578.82 | 1156.64 | K   | 593.35  | 297.18 | 4  |
| 11 | 670.88 | 1340.76 | K   | 409.23  | 205.12 | 3  |
| 12 | 719.41 | 1437.81 | P   | 312.18  | 156.59 | 2  |
| 13 | 787.94 | 1574.87 | H   | 175.12  | 88.06  | 1  |
| 14 | 865.99 | 1730.97 | R   |         |        |    |

\* = 140Da diagnostic ion

# H3.1\_K27-R40:

## KSAPATGGVKMe3KPHR

Overlaps with K27me2K36me1 (page 259). AUC determined on MS2 level (see page 244).

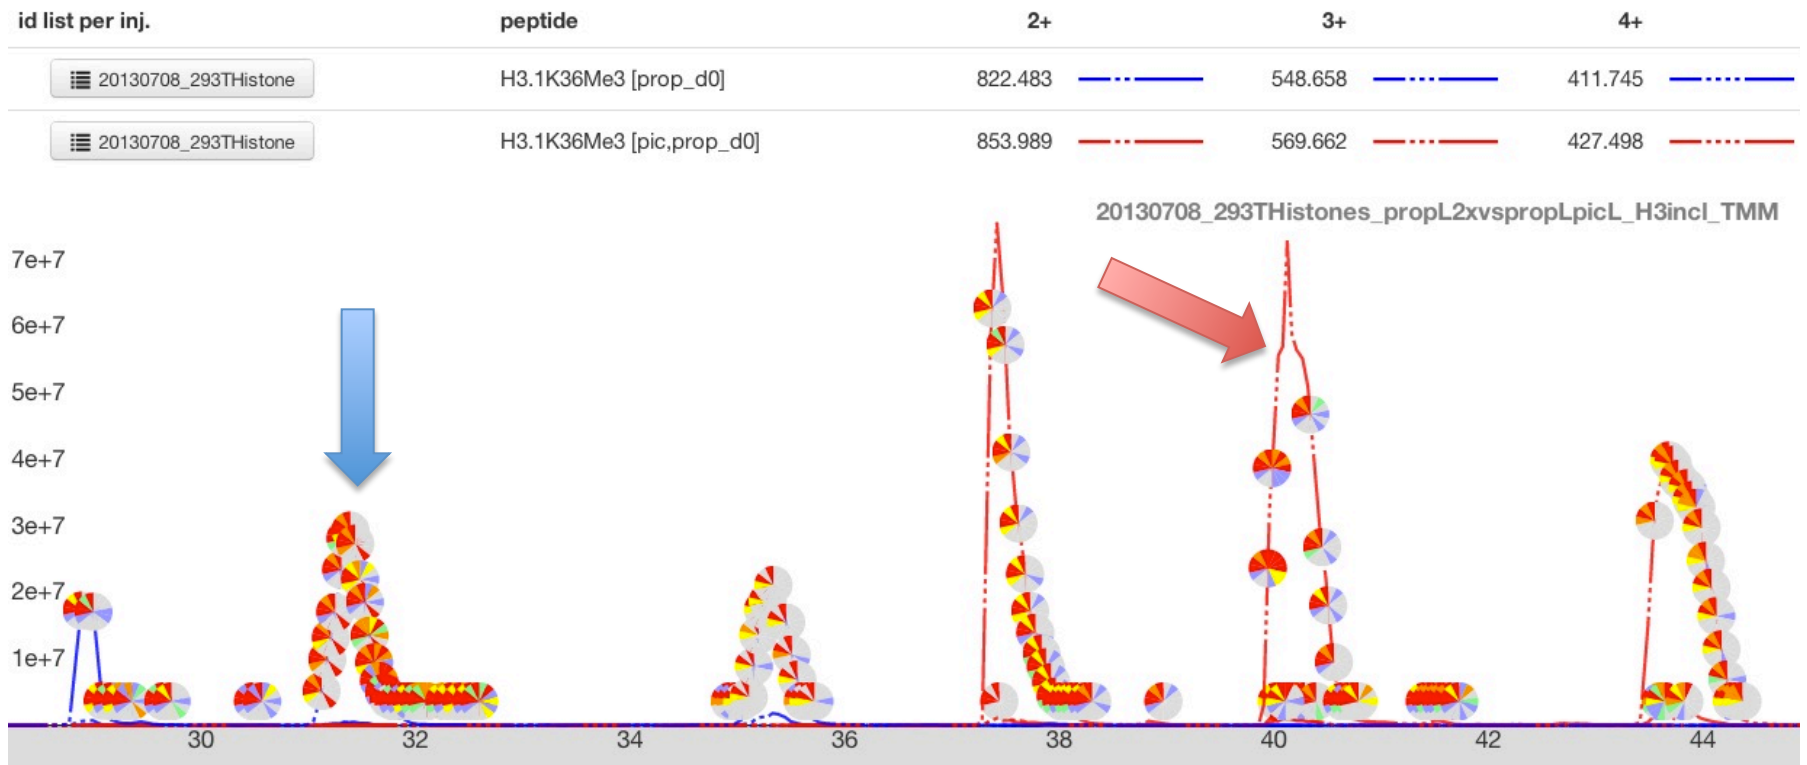

# H3.1\_K27-R40: KSAPATGGVKMe3KPHR

20130708\_293THistones\_propL2xvspropLp... 7/8/2013 11:43:33 AM

6 of 10 ul, Histones  
RT: 23.31 - 50.59

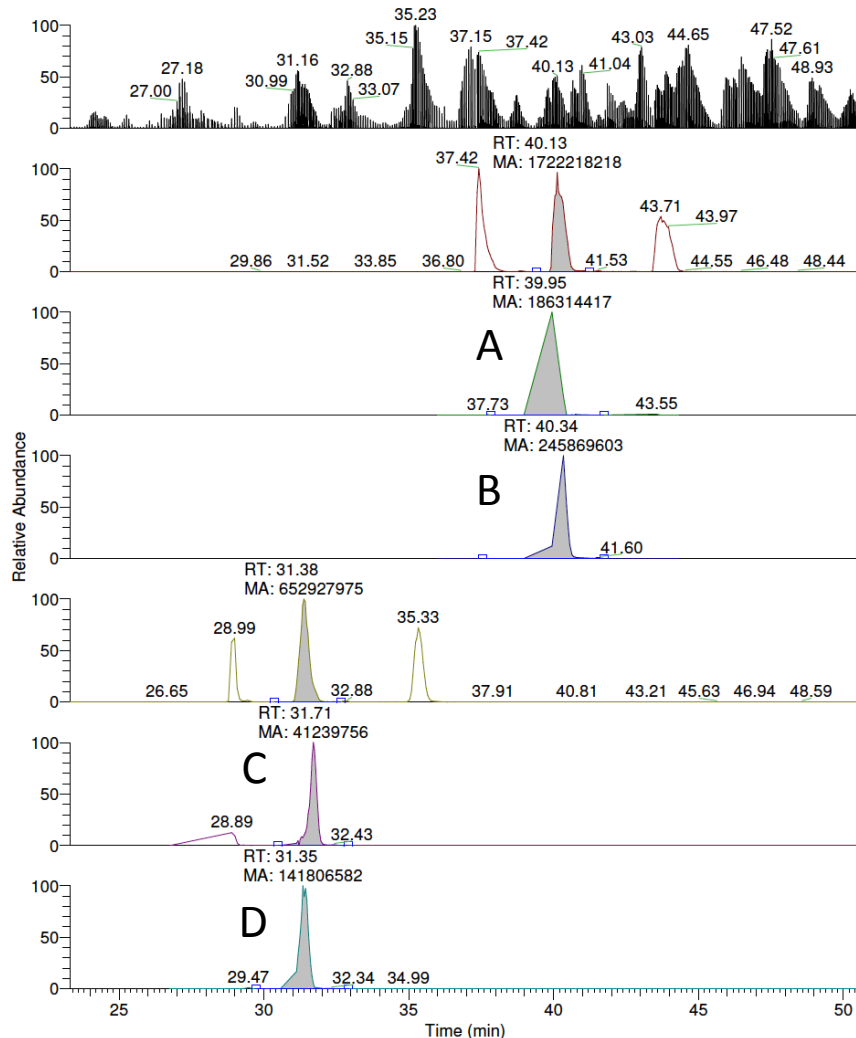

PIC

Prop

AUC calculation on MS2 level:

XIC-PIC 569.66 (3+)  
574.85, 623.38, 658.89, 702.41

XIC-Prop 548.658 (3+)  
539.33, 623.37, 658.89, 702.41,  
1051.61, 1235.74

- A = K36Me3-peak PIC
- B = K27Me2K36Me1-peak PIC
- C = K36Me3-peak Prop
- D = K27Me2K36Me1-peak Prop

## Quanti event: 30.7-33.2min

| injection                                           | peptide                  | charge | m/z      | auc    |
|-----------------------------------------------------|--------------------------|--------|----------|--------|
| 20130708_293THistones_propL2xvspropLpicL_H3incl_TMM | H3.1K36Me3 [prop_d0]     | 2      | 822.4832 | 5.1e+6 |
| 20130708_293THistones_propL2xvspropLpicL_H3incl_TMM | H3.1K36Me3 [pic,prop_d0] | 2      | 853.9887 | 0.0e+0 |
| 20130708_293THistones_propL2xvspropLpicL_H3incl_TMM | H3.1K36Me3 [prop_d0]     | 3      | 548.6579 | 6.5e+8 |
| 20130708_293THistones_propL2xvspropLpicL_H3incl_TMM | H3.1K36Me3 [pic,prop_d0] | 3      | 569.6615 | 4.2e+4 |
| 20130708_293THistones_propL2xvspropLpicL_H3incl_TMM | H3.1K36Me3 [prop_d0]     | 4      | 411.7452 | 1.0e+7 |
| 20130708_293THistones_propL2xvspropLpicL_H3incl_TMM | H3.1K36Me3 [pic,prop_d0] | 4      | 427.4980 | 2.7e+4 |

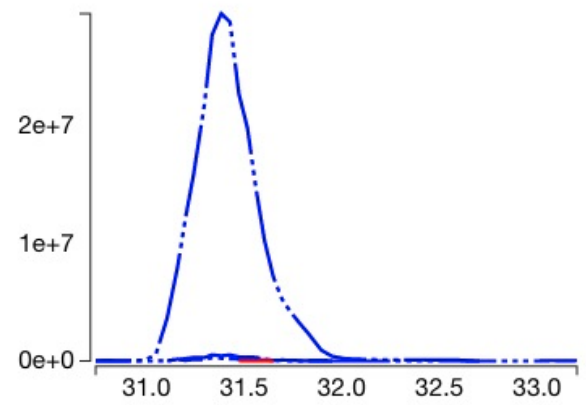

## Quanti event: 39.4-42.2min

| injection                                           | peptide                  | charge | m/z      | auc    |
|-----------------------------------------------------|--------------------------|--------|----------|--------|
| 20130708_293THistones_propL2xvspropLpicL_H3incl_TMM | H3.1K36Me3 [prop_d0]     | 2      | 822.4832 | 9.0e+5 |
| 20130708_293THistones_propL2xvspropLpicL_H3incl_TMM | H3.1K36Me3 [pic,prop_d0] | 2      | 853.9887 | 2.5e+7 |
| 20130708_293THistones_propL2xvspropLpicL_H3incl_TMM | H3.1K36Me3 [prop_d0]     | 3      | 548.6579 | 2.8e+5 |
| 20130708_293THistones_propL2xvspropLpicL_H3incl_TMM | H3.1K36Me3 [pic,prop_d0] | 3      | 569.6615 | 1.7e+9 |
| 20130708_293THistones_propL2xvspropLpicL_H3incl_TMM | H3.1K36Me3 [prop_d0]     | 4      | 411.7452 | 1.7e+5 |
| 20130708_293THistones_propL2xvspropLpicL_H3incl_TMM | H3.1K36Me3 [pic,prop_d0] | 4      | 427.4980 | 2.7e+7 |

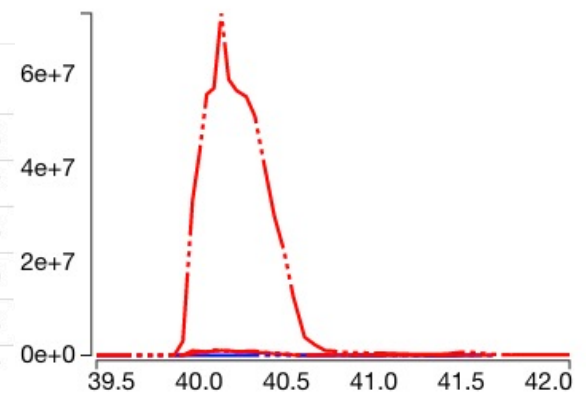

# H3.1\_K27-R40: Prop-KSAPATGGVKMe3KPHR MS/MS

### Experimental spectrum

scan 4678  
 retention time 32.0min  
 precursor m/z 548.6571  
 precursor charge 3+

### Theoretical

M H<sup>3+</sup> 548.6579  
 MH Δ<sub>mass</sub> Da -0.0024  
 MH Δ<sub>mass</sub> ppm -1.5

### edit peptide

{Propionyl}K{Propionyl}SAPATGGVK{Trimethyl}K{Propionyl}PHR

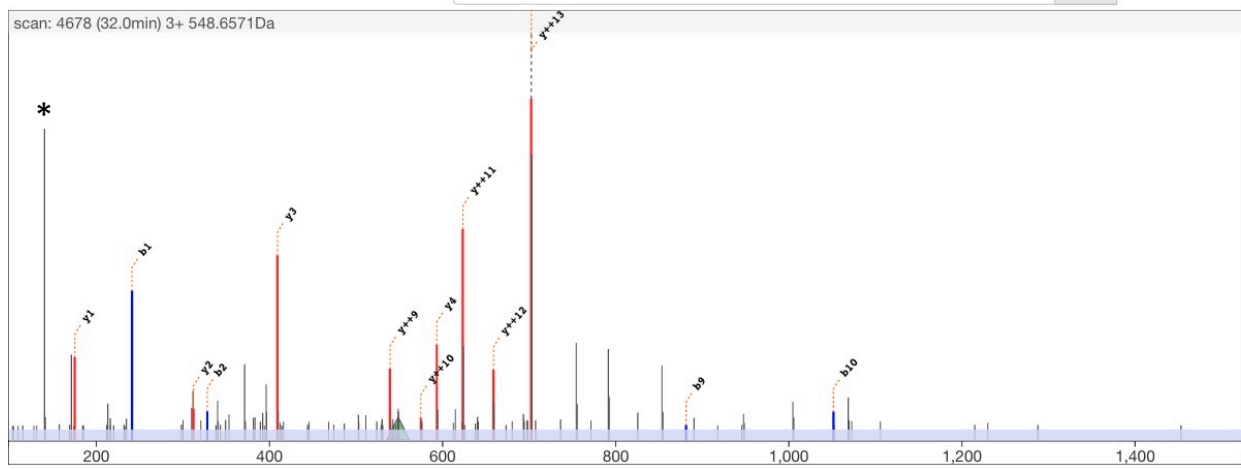

|    | b++    | b       |                | y       | y++    |    |
|----|--------|---------|----------------|---------|--------|----|
|    |        |         | Propionyl      | 1587.93 | 794.47 | 14 |
| 1  | 121.08 | 241.15  | K              | 1403.81 | 702.41 | 13 |
| 2  | 164.60 | 328.19  | S              | 1316.78 | 658.89 | 12 |
| 3  | 200.12 | 399.22  | A              | 1245.74 | 623.37 | 11 |
| 4  | 248.64 | 496.28  | P              | 1148.69 | 574.85 | 10 |
| 5  | 284.16 | 567.31  | A              | 1077.65 | 539.33 | 9  |
| 6  | 334.68 | 668.36  | T              | 976.61  | 488.81 | 8  |
| 7  | 363.20 | 725.38  | G              | 919.58  | 460.30 | 7  |
| 8  | 391.71 | 782.40  | V              | 862.56  | 431.78 | 6  |
| 9  | 441.24 | 881.47  | K              | 763.49  | 382.25 | 5  |
| 10 | 526.31 | 1051.61 | Trimethyl<br>K | 593.35  | 297.18 | 4  |
| 11 | 618.37 | 1235.74 | Propionyl<br>K | 409.23  | 205.12 | 3  |
| 12 | 666.90 | 1332.79 | P              | 312.18  | 156.59 | 2  |
| 13 | 735.43 | 1469.85 | H              | 175.12  | 88.06  | 1  |
| 14 | 813.48 | 1625.95 | R              |         |        |    |

\* = 140Da diagnostic ion

# H3.1\_K27-R40: PIC-KSAPATGGVKMe3KPHR MS/MS

### Experimental spectrum

scan 6634  
 retention time 39.9min  
 precursor m/z 569.6607  
 precursor charge 3+

### Theoretical

M H<sup>3+</sup> 569.6615  
 MH Δ<sub>mass</sub> Da -0.0025  
 MH Δ<sub>mass</sub> ppm -1.5

### edit peptide

{PIC}K{Propionyl}SAPATGGVK{Trimethyl}K{Propionyl}PHR

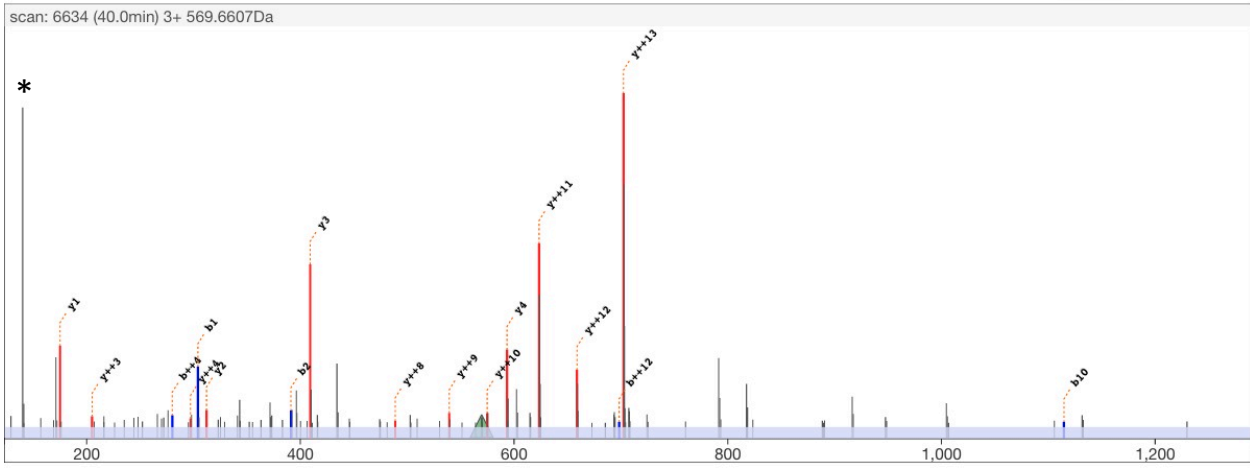

|    | b++    | b       |           | y       | y++    |    |
|----|--------|---------|-----------|---------|--------|----|
|    | 60.53  | 120.04  | PIC       | 1587.93 | 794.47 | 14 |
| 1  | 152.59 | 304.17  | K         | 1403.81 | 702.41 | 13 |
| 2  | 196.10 | 391.20  | S         | 1316.78 | 658.89 | 12 |
| 3  | 231.62 | 462.23  | A         | 1245.74 | 623.37 | 11 |
| 4  | 280.15 | 559.29  | P         | 1148.69 | 574.85 | 10 |
| 5  | 315.67 | 630.32  | A         | 1077.65 | 539.33 | 9  |
| 6  | 366.19 | 731.37  | T         | 976.61  | 488.81 | 8  |
| 7  | 394.70 | 788.39  | G         | 919.58  | 460.30 | 7  |
| 8  | 423.21 | 845.42  | V         | 862.56  | 431.78 | 6  |
| 9  | 472.75 | 944.48  | K         | 763.49  | 382.25 | 5  |
| 10 | 557.82 | 1114.63 | Trimethyl | 593.35  | 297.18 | 4  |
| 11 | 649.88 | 1298.75 | K         | 409.23  | 205.12 | 3  |
| 12 | 698.40 | 1395.80 | Propionyl | 312.18  | 156.59 | 2  |
| 13 | 766.93 | 1532.86 | P         | 175.12  | 88.06  | 1  |
| 14 | 844.98 | 1688.96 | H         |         |        |    |
|    |        |         | R         |         |        |    |

\* = 140Da diagnostic ion

# H3.1\_K27-R40: KSAPATGGVK**Ac**KPHR

No MS2 for Prop-peak detected.

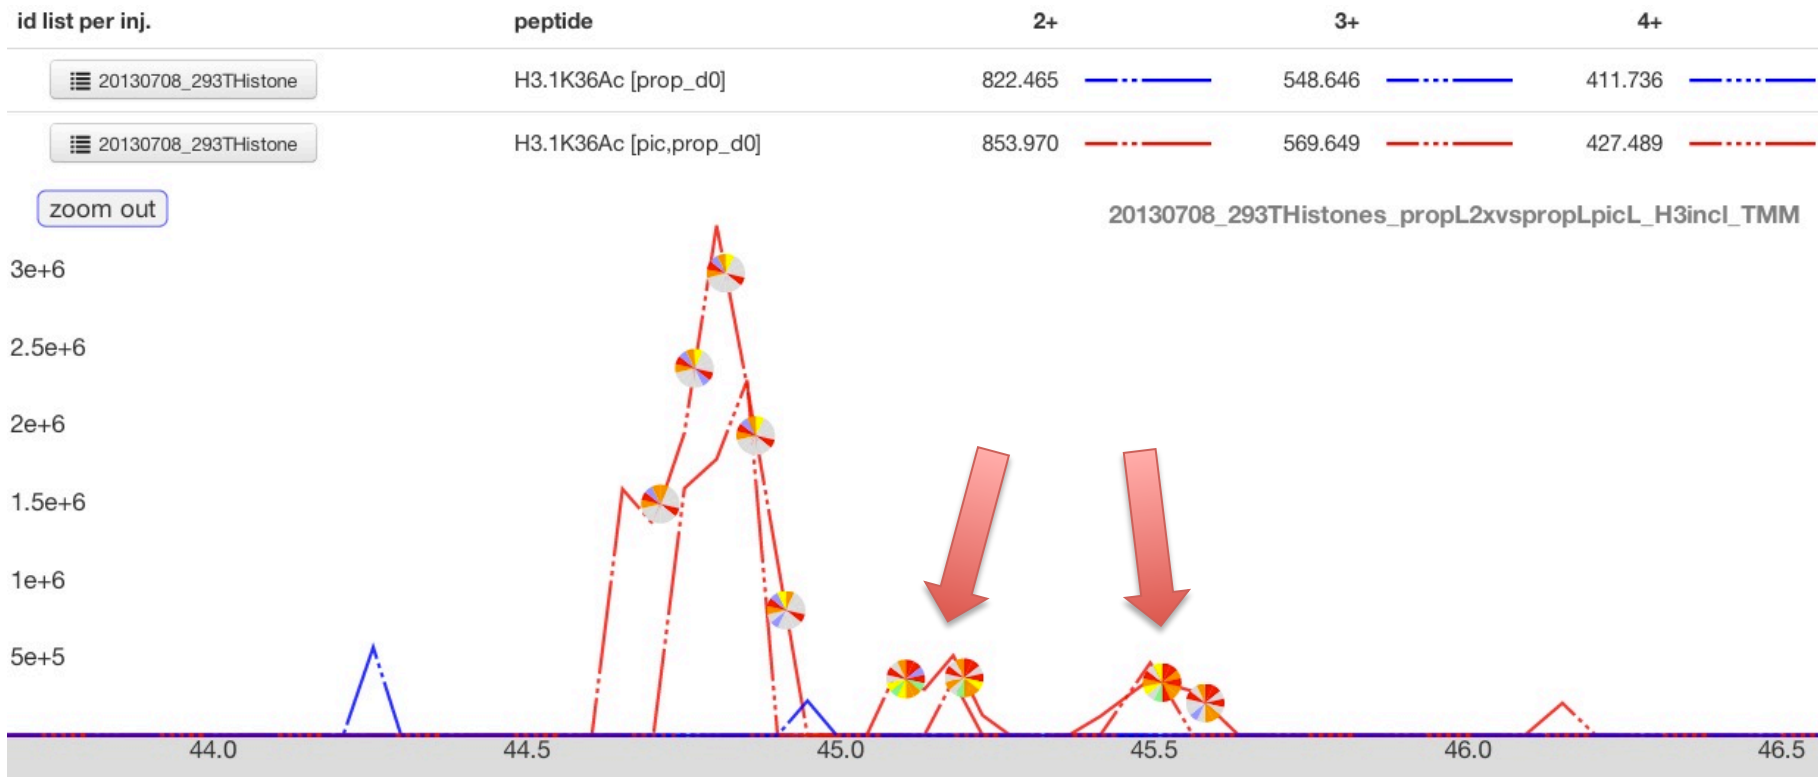



### Quanti event: 45.0-45.7min

| injection                                           | peptide                 | charge | m/z      | auc    |
|-----------------------------------------------------|-------------------------|--------|----------|--------|
| 20130708_293THistones_propL2xvspropLpicL_H3incl_TMM | H3.1K36Ac [prop_d0]     | 2      | 822.4650 | 0.0e+0 |
| 20130708_293THistones_propL2xvspropLpicL_H3incl_TMM | H3.1K36Ac [pic,prop_d0] | 2      | 853.9705 | 4.1e+5 |
| 20130708_293THistones_propL2xvspropLpicL_H3incl_TMM | H3.1K36Ac [prop_d0]     | 3      | 548.6458 | 0.0e+0 |
| 20130708_293THistones_propL2xvspropLpicL_H3incl_TMM | H3.1K36Ac [pic,prop_d0] | 3      | 569.6494 | 1.8e+5 |
| 20130708_293THistones_propL2xvspropLpicL_H3incl_TMM | H3.1K36Ac [prop_d0]     | 4      | 411.7361 | 0.0e+0 |
| 20130708_293THistones_propL2xvspropLpicL_H3incl_TMM | H3.1K36Ac [pic,prop_d0] | 4      | 427.4889 | 0.0e+0 |

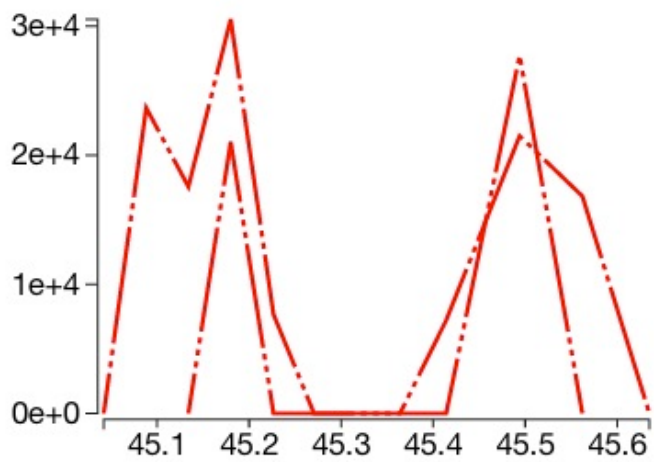

Prop-only peak not detected.

# H3.1\_K27-R40: PIC-KSAPATGGVKAcKPHR MS/MS

**Experimental spectrum**

scan 8214  
 retention time 45.1min  
 precursor m/z 853.9702  
 precursor charge 2+

**Theoretical**

M H<sup>2+</sup> 853.9705  
 MH Δ<sub>mass</sub> Da -0.0006  
 MH Δ<sub>mass</sub> ppm -0.4

**edit peptide**

{PIC}K{Propionyl}SAPATGGVK{Acetyl}K{Propionyl}PHR

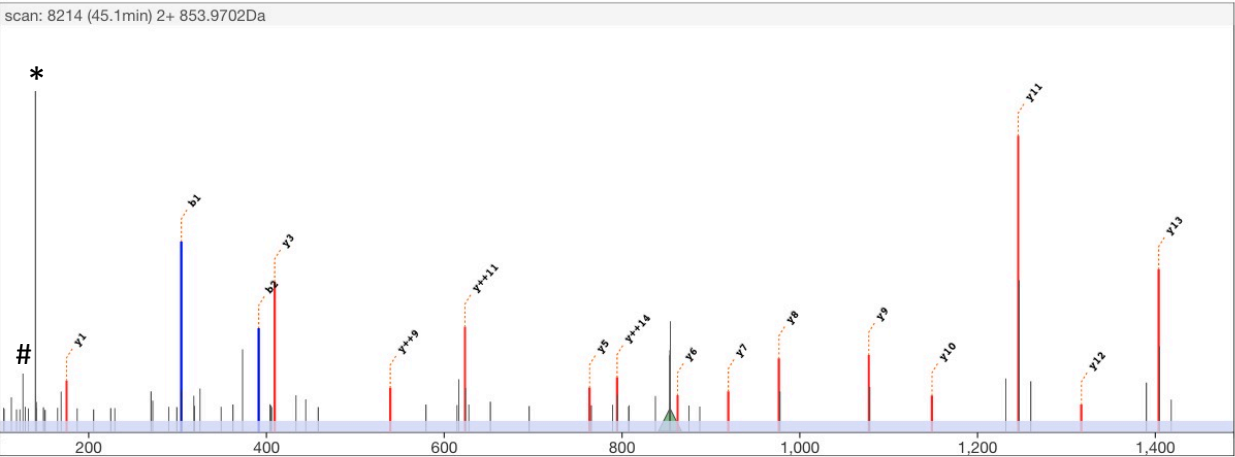

|    | b++    | b       |           | y       | y++    |    |
|----|--------|---------|-----------|---------|--------|----|
|    | 60.53  | 120.04  | PIC       | 1587.90 | 794.45 | 14 |
| 1  | 152.59 | 304.17  | K         | 1403.78 | 702.39 | 13 |
| 2  | 196.10 | 391.20  | S         | 1316.74 | 658.88 | 12 |
| 3  | 231.62 | 462.23  | A         | 1245.71 | 623.36 | 11 |
| 4  | 280.15 | 559.29  | P         | 1148.65 | 574.83 | 10 |
| 5  | 315.67 | 630.32  | A         | 1077.62 | 539.31 | 9  |
| 6  | 366.19 | 731.37  | T         | 976.57  | 488.79 | 8  |
| 7  | 394.70 | 788.39  | G         | 919.55  | 460.28 | 7  |
| 8  | 423.21 | 845.42  | V         | 862.53  | 431.77 | 6  |
| 9  | 472.75 | 944.48  | K         | 763.46  | 382.23 | 5  |
| 10 | 557.80 | 1114.59 | Acetyl    | 593.35  | 297.18 | 4  |
| 11 | 649.86 | 1298.71 | K         | 409.23  | 205.12 | 3  |
| 12 | 698.39 | 1395.76 | Propionyl | 312.18  | 156.59 | 2  |
| 13 | 766.91 | 1532.82 | P         | 175.12  | 88.06  | 1  |
| 14 | 844.97 | 1688.92 | H         |         |        |    |
|    |        |         | R         |         |        |    |

\* = 140Da diagnostic ion  
 # = 126Da diagnostic ion
