# Supplementary material
Source: PubMed Central journal article supplement (PMC4390259)
Supplement: supp_O114.046573_mcp.O114.046573-7.pdf [file supp_O114.046573_mcp.O114.046573-7.pdf]

# H3.1\_K27-R40:

KMe1SAPATGGVKMe1KPHR

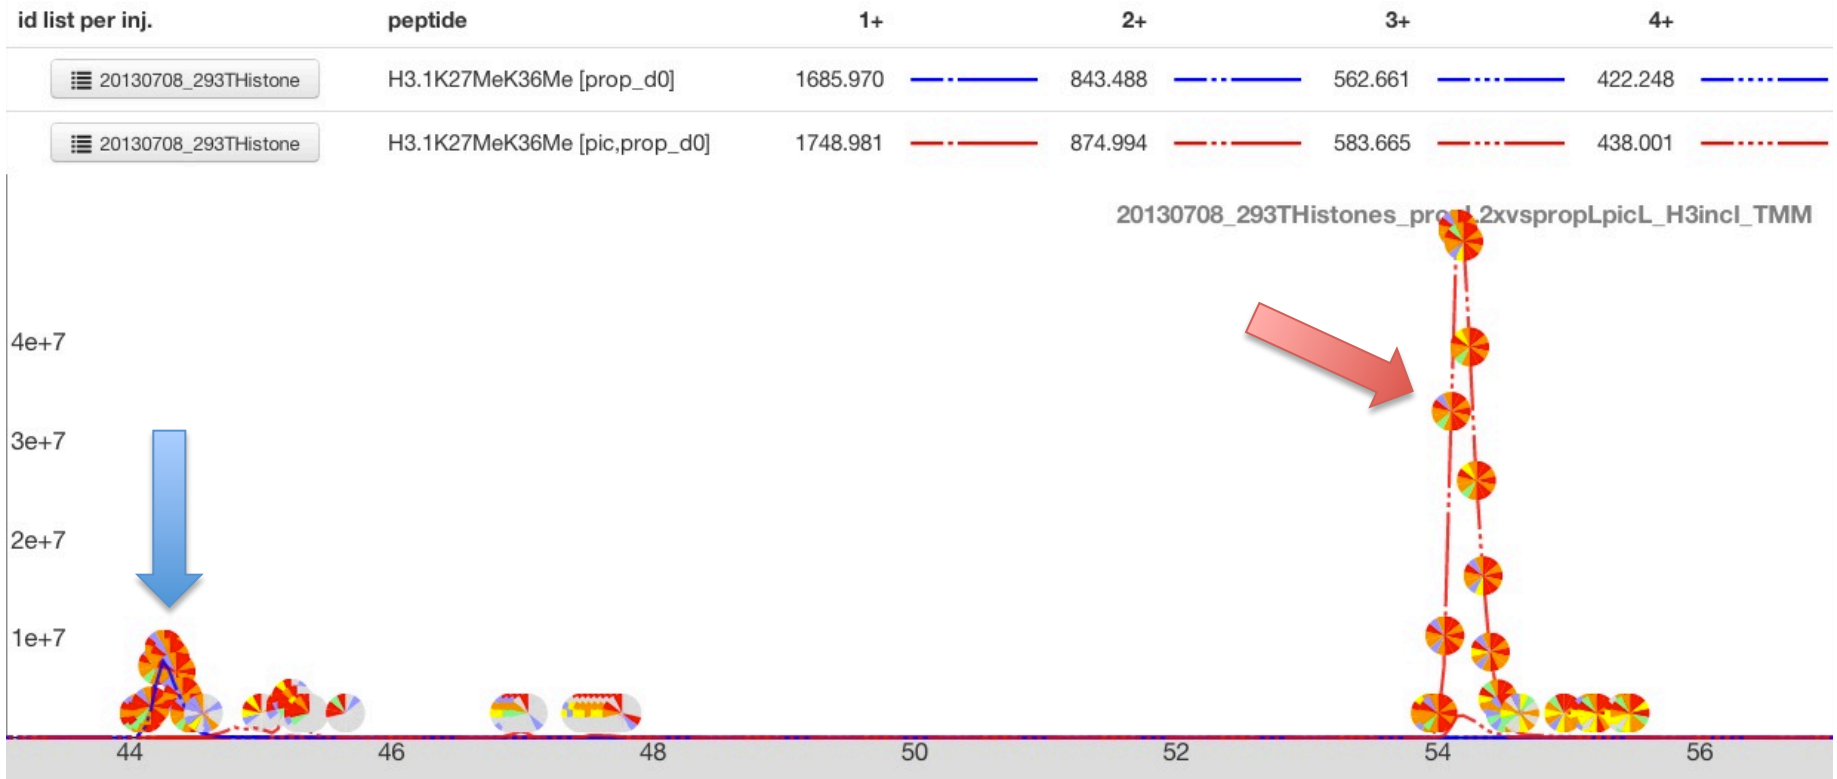

### Quanti event: 43.5-44.8min

| injection                                           | peptide                      | charge | m/z       | auc    |
|-----------------------------------------------------|------------------------------|--------|-----------|--------|
| 20130708_293THistones_propL2xvspropLpicL_H3incl_TMM | H3.1K27MeK36Me [prop_d0]     | 1      | 1685.9697 | 0.0e+0 |
| 20130708_293THistones_propL2xvspropLpicL_H3incl_TMM | H3.1K27MeK36Me [pic,prop_d0] | 1      | 1748.9806 | 0.0e+0 |
| 20130708_293THistones_propL2xvspropLpicL_H3incl_TMM | H3.1K27MeK36Me [prop_d0]     | 2      | 843.4885  | 1.3e+8 |
| 20130708_293THistones_propL2xvspropLpicL_H3incl_TMM | H3.1K27MeK36Me [pic,prop_d0] | 2      | 874.9939  | 0.0e+0 |
| 20130708_293THistones_propL2xvspropLpicL_H3incl_TMM | H3.1K27MeK36Me [prop_d0]     | 3      | 562.6614  | 1.1e+8 |
| 20130708_293THistones_propL2xvspropLpicL_H3incl_TMM | H3.1K27MeK36Me [pic,prop_d0] | 3      | 583.6651  | 6.8e+6 |
| 20130708_293THistones_propL2xvspropLpicL_H3incl_TMM | H3.1K27MeK36Me [prop_d0]     | 4      | 422.2479  | 0.0e+0 |
| 20130708_293THistones_propL2xvspropLpicL_H3incl_TMM | H3.1K27MeK36Me [pic,prop_d0] | 4      | 438.0006  | 4.6e+4 |

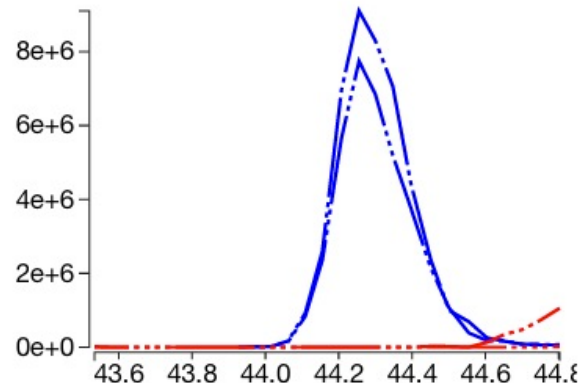

### Quanti event: 53.8-55.3min

| injection                                           | peptide                      | charge | m/z       | auc    |
|-----------------------------------------------------|------------------------------|--------|-----------|--------|
| 20130708_293THistones_propL2xvspropLpicL_H3incl_TMM | H3.1K27MeK36Me [prop_d0]     | 1      | 1685.9697 | 0.0e+0 |
| 20130708_293THistones_propL2xvspropLpicL_H3incl_TMM | H3.1K27MeK36Me [pic,prop_d0] | 1      | 1748.9806 | 0.0e+0 |
| 20130708_293THistones_propL2xvspropLpicL_H3incl_TMM | H3.1K27MeK36Me [prop_d0]     | 2      | 843.4885  | 1.3e+5 |
| 20130708_293THistones_propL2xvspropLpicL_H3incl_TMM | H3.1K27MeK36Me [pic,prop_d0] | 2      | 874.9939  | 7.2e+8 |
| 20130708_293THistones_propL2xvspropLpicL_H3incl_TMM | H3.1K27MeK36Me [prop_d0]     | 3      | 562.6614  | 0.0e+0 |
| 20130708_293THistones_propL2xvspropLpicL_H3incl_TMM | H3.1K27MeK36Me [pic,prop_d0] | 3      | 583.6651  | 3.5e+7 |
| 20130708_293THistones_propL2xvspropLpicL_H3incl_TMM | H3.1K27MeK36Me [prop_d0]     | 4      | 422.2479  | 0.0e+0 |
| 20130708_293THistones_propL2xvspropLpicL_H3incl_TMM | H3.1K27MeK36Me [pic,prop_d0] | 4      | 438.0006  | 0.0e+0 |

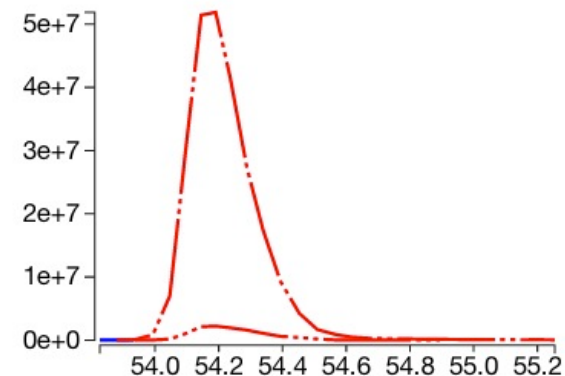

**Experimental spectrum**

scan 7938  
 retention time 44.3min  
 precursor m/z 843.4865  
 precursor charge 2+

**Theoretical**

M H<sup>2+</sup> 843.4885  
 MH Δ<sub>mass</sub> Da -0.0041  
 MH Δ<sub>mass</sub> ppm -2.4

**edit peptide**

{Propionyl}K{Methyl,Propionyl}SAPATGGVK{Methyl,Propionyl}K{Propionyl}PHR align

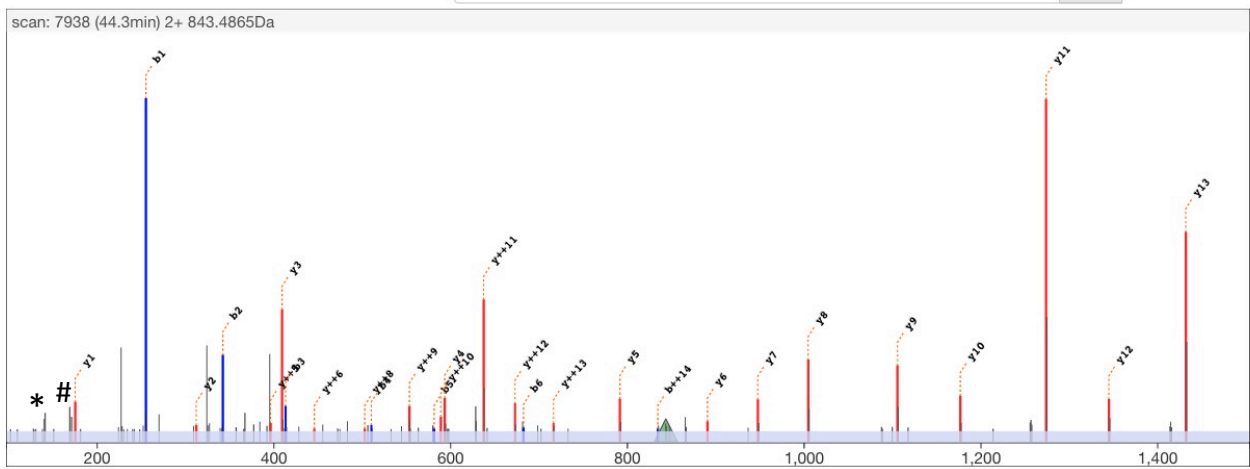

|    | b++    | b       |                    | y       | y++    |    |
|----|--------|---------|--------------------|---------|--------|----|
|    |        |         | Propionyl          | 1629.94 | 815.48 | 14 |
| 1  | 128.09 | 255.17  | Methyl(Propionyl)K | 1431.81 | 716.41 | 13 |
| 2  | 171.60 | 342.20  | S                  | 1344.77 | 672.89 | 12 |
| 3  | 207.12 | 413.24  | A                  | 1273.74 | 637.37 | 11 |
| 4  | 255.65 | 510.29  | P                  | 1176.68 | 588.85 | 10 |
| 5  | 291.17 | 581.33  | A                  | 1105.65 | 553.33 | 9  |
| 6  | 341.69 | 682.38  | T                  | 1004.60 | 502.80 | 8  |
| 7  | 370.20 | 739.40  | G                  | 947.58  | 474.29 | 7  |
| 8  | 398.71 | 796.42  | V                  | 890.56  | 445.78 | 6  |
| 9  | 448.25 | 895.49  | K                  | 791.49  | 396.25 | 5  |
| 10 | 547.32 | 1093.63 | Methyl(Propionyl)K | 593.35  | 297.18 | 4  |
| 11 | 639.38 | 1277.75 | Propionyl)K        | 409.23  | 205.12 | 3  |
| 12 | 687.90 | 1374.80 | P                  | 312.18  | 156.59 | 2  |
| 13 | 756.43 | 1511.86 | H                  | 175.12  | 88.06  | 1  |
| 14 | 834.48 | 1667.96 | R                  |         |        |    |

\* = 140Da diagnostic ion  
 # = 171Da diagnostic ion

# H3.1\_K27-R40: PIC-KMe1SAPATGGVKMe1KPHR MS/MS

**Experimental spectrum**

scan 11058  
 retention time 54.2min  
 precursor m/z 874.9935  
 precursor charge 2+

**Theoretical**

M H<sup>2+</sup> 874.9939  
 MH  $\Delta_{mass}$  Da -0.0008  
 MH  $\Delta_{mass}$  ppm -0.5

**edit peptide**

{PIC}K{Methyl,Propionyl}SAPATGGVK{Methyl,Propionyl}K{Propionyl}PHR align

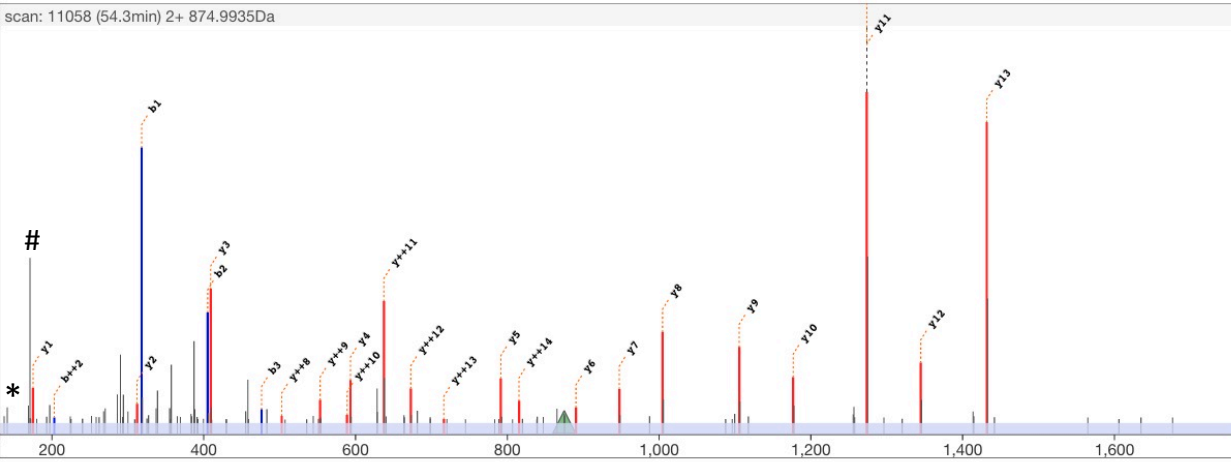

|    | b++    | b       |                  | y       | y++    |    |
|----|--------|---------|------------------|---------|--------|----|
|    | 60.53  | 120.04  | PIC              | 1629.94 | 815.48 | 14 |
| 1  | 159.59 | 318.18  | Methyl,Propionyl | 1431.81 | 716.41 | 13 |
| 2  | 203.11 | 405.21  | K                | 1344.77 | 672.89 | 12 |
| 3  | 238.63 | 476.25  | S                | 1273.74 | 637.37 | 11 |
| 4  | 287.16 | 573.30  | A                | 1176.68 | 588.85 | 10 |
| 5  | 322.67 | 644.34  | P                | 1105.65 | 553.33 | 9  |
| 6  | 373.20 | 745.39  | A                | 1004.60 | 502.80 | 8  |
| 7  | 401.71 | 802.41  | T                | 947.58  | 474.29 | 7  |
| 8  | 430.22 | 859.43  | G                | 890.56  | 445.78 | 6  |
| 9  | 479.75 | 958.50  | V                | 791.49  | 396.25 | 5  |
| 10 | 578.82 | 1156.64 | Methyl,Propionyl | 593.35  | 297.18 | 4  |
| 11 | 670.88 | 1340.76 | K                | 409.23  | 205.12 | 3  |
| 12 | 719.41 | 1437.81 | Propionyl        | 312.18  | 156.59 | 2  |
| 13 | 787.94 | 1574.87 | P                | 175.12  | 88.06  | 1  |
| 14 | 865.99 | 1730.97 | H                |         |        |    |
|    |        |         | R                |         |        |    |

\* = 140Da diagnostic ion  
 # = 171Da diagnostic ion

# H3.1\_K27-R40:

KMe1SProp?APATProp?GGVKMe1KPHR

Only S28-prop MS2 found for double peaks.

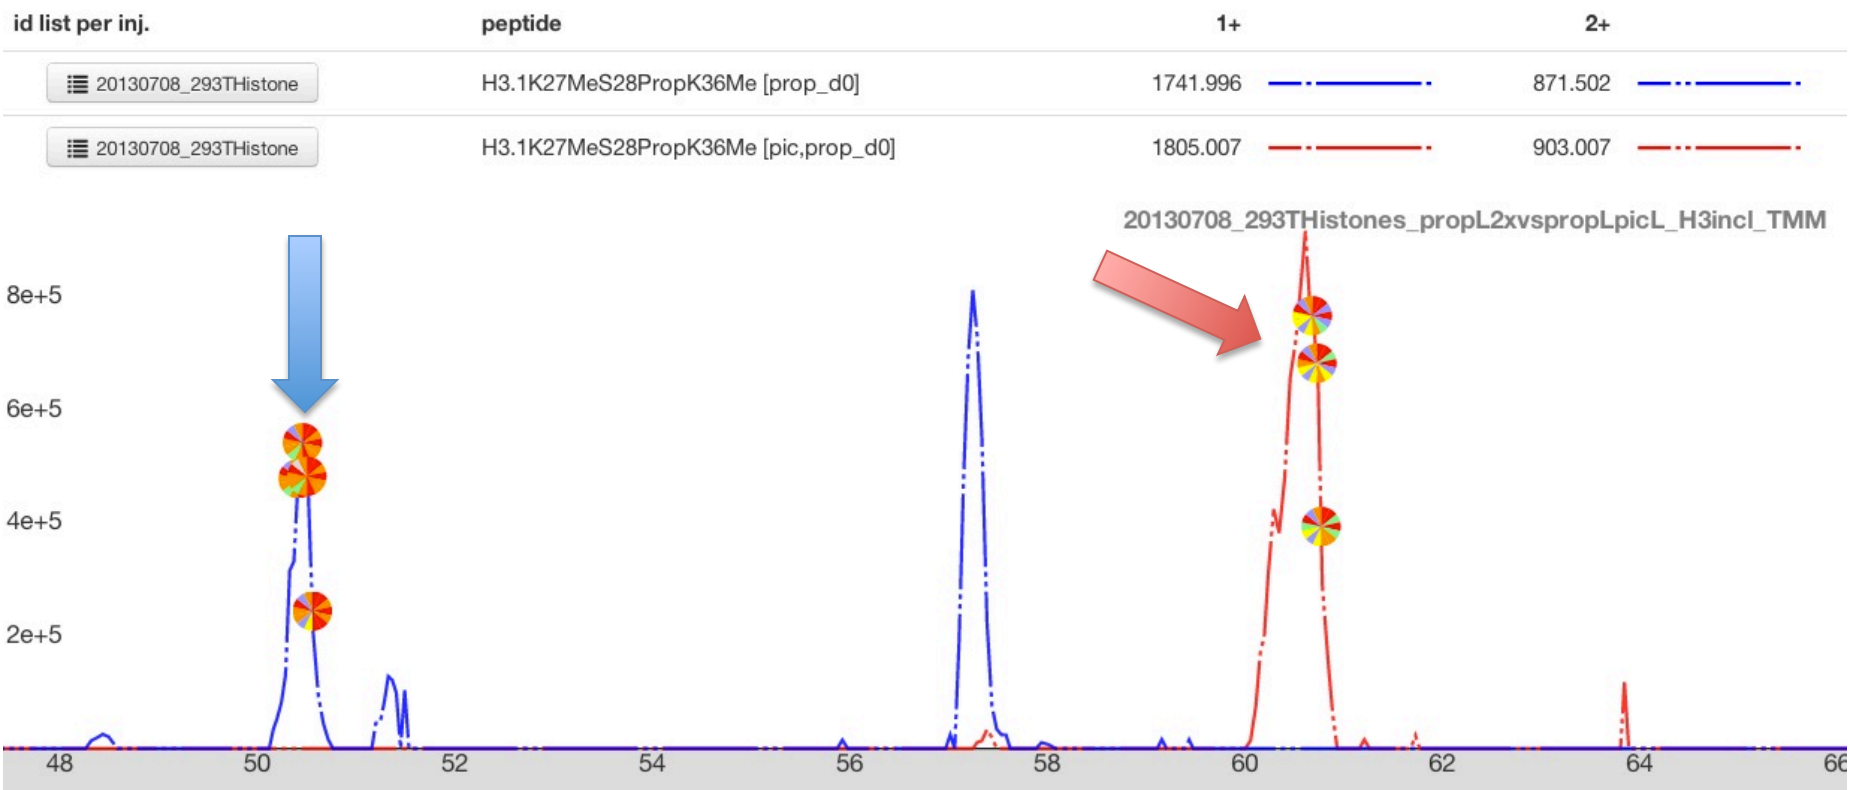

### Quanti event: 49.6-50.9min

| injection                                           | peptide                                | charge | m/z       | auc    |
|-----------------------------------------------------|----------------------------------------|--------|-----------|--------|
| 20130708_293THistones_propL2xvspropLpicL_H3incl_TMM | H3.1K27MeS28PropK36Me<br>[prop_d0]     | 1      | 1741.9959 | 0.0e+0 |
| 20130708_293THistones_propL2xvspropLpicL_H3incl_TMM | H3.1K27MeS28PropK36Me<br>[pic,prop_d0] | 1      | 1805.0068 | 0.0e+0 |
| 20130708_293THistones_propL2xvspropLpicL_H3incl_TMM | H3.1K27MeS28PropK36Me<br>[prop_d0]     | 2      | 871.5016  | 7.9e+6 |
| 20130708_293THistones_propL2xvspropLpicL_H3incl_TMM | H3.1K27MeS28PropK36Me<br>[pic,prop_d0] | 2      | 903.0071  | 0.0e+0 |

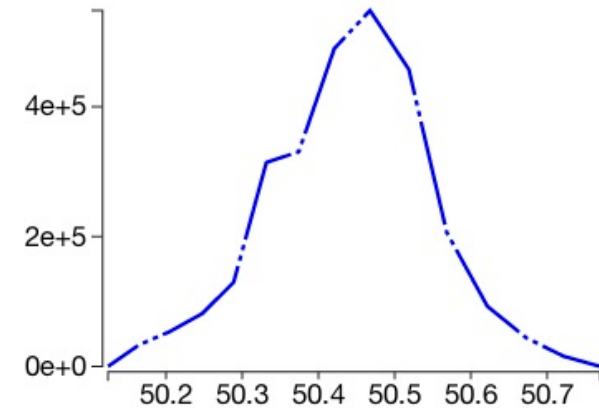

### Quanti event: 59.7-61.1min

| injection                                           | peptide                                | charge | m/z       | auc    |
|-----------------------------------------------------|----------------------------------------|--------|-----------|--------|
| 20130708_293THistones_propL2xvspropLpicL_H3incl_TMM | H3.1K27MeS28PropK36Me<br>[prop_d0]     | 1      | 1741.9959 | 0.0e+0 |
| 20130708_293THistones_propL2xvspropLpicL_H3incl_TMM | H3.1K27MeS28PropK36Me<br>[pic,prop_d0] | 1      | 1805.0068 | 0.0e+0 |
| 20130708_293THistones_propL2xvspropLpicL_H3incl_TMM | H3.1K27MeS28PropK36Me<br>[prop_d0]     | 2      | 871.5016  | 0.0e+0 |
| 20130708_293THistones_propL2xvspropLpicL_H3incl_TMM | H3.1K27MeS28PropK36Me<br>[pic,prop_d0] | 2      | 903.0071  | 2.3e+7 |

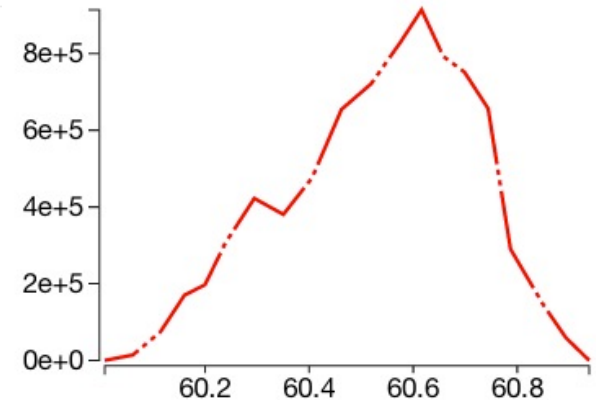

**Experimental spectrum**

scan 9839  
 retention time 50.5min  
 precursor m/z 871.4999  
 precursor charge 2+

**Theoretical**

M H<sup>2+</sup> 871.5016  
 MH Δ<sub>mass</sub> Da -0.0035  
 MH Δ<sub>mass</sub> ppm -2.0

**edit peptide**

{Propionyl}K{(Methyl,Propionyl)S{Propionyl}APATGGVK{(Methyl,Propionyl)K{Propioi align

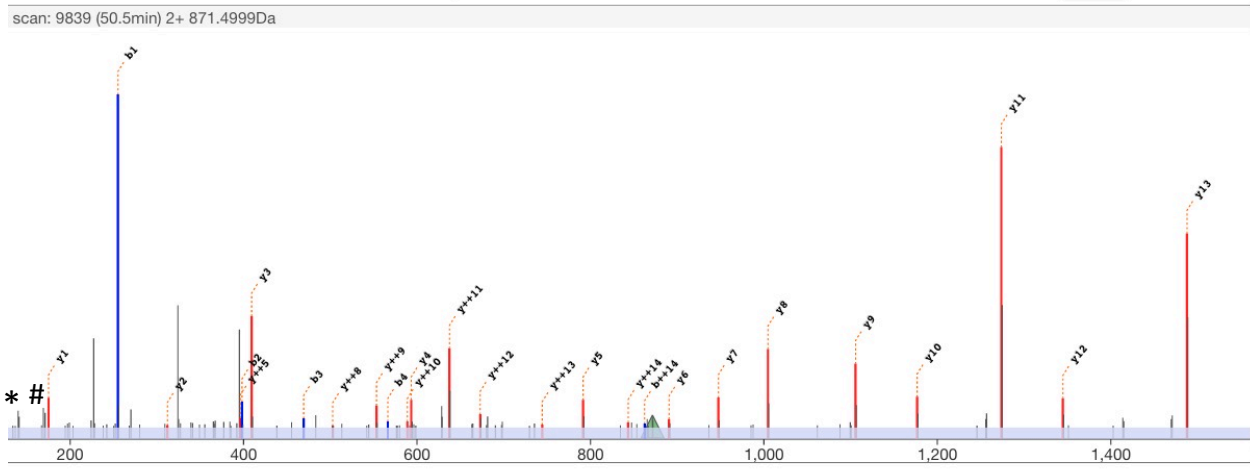

|    | b++    | b       | y                | y++     |        |    |
|----|--------|---------|------------------|---------|--------|----|
|    |        |         | Propionyl        | 1685.97 | 843.49 | 14 |
| 1  | 128.09 | 255.17  | K                | 1487.83 | 744.42 | 13 |
|    |        |         | Methyl,Propionyl |         |        |    |
| 2  | 199.62 | 398.23  | S                | 1344.77 | 672.89 | 12 |
|    |        |         | Propionyl        |         |        |    |
| 3  | 235.14 | 469.27  | A                | 1273.74 | 637.37 | 11 |
|    |        |         | P                |         |        |    |
| 4  | 283.66 | 566.32  | A                | 1176.68 | 588.85 | 10 |
|    |        |         | T                |         |        |    |
| 5  | 319.18 | 637.36  | A                | 1105.65 | 553.33 | 9  |
|    |        |         | T                |         |        |    |
| 6  | 369.71 | 738.40  | G                | 1004.60 | 502.80 | 8  |
|    |        |         | V                |         |        |    |
| 7  | 398.22 | 795.42  | G                | 947.58  | 474.29 | 7  |
|    |        |         | V                |         |        |    |
| 8  | 426.73 | 852.45  | K                | 890.56  | 445.78 | 6  |
|    |        |         | Methyl,Propionyl |         |        |    |
| 9  | 476.26 | 951.51  | K                | 791.49  | 396.25 | 5  |
|    |        |         | Propionyl        |         |        |    |
| 10 | 575.33 | 1149.65 | K                | 593.35  | 297.18 | 4  |
|    |        |         | P                |         |        |    |
| 11 | 667.39 | 1333.77 | K                | 409.23  | 205.12 | 3  |
|    |        |         | H                |         |        |    |
| 12 | 715.92 | 1430.83 | R                | 312.18  | 156.59 | 2  |
|    |        |         |                  |         |        |    |
| 13 | 784.45 | 1567.88 |                  | 175.12  | 88.06  | 1  |
| 14 | 862.50 | 1723.99 |                  |         |        |    |

\* = 140Da diagnostic ion  
 # = 171Da diagnostic ion

**Experimental spectrum**

scan 13165  
 retention time 60.8min  
 precursor m/z 903.0058  
 precursor charge 2+

**Theoretical**

M H<sup>2+</sup> 903.0071  
 MH Δ<sub>mass</sub> Da -0.0025  
 MH Δ<sub>mass</sub> ppm -1.4

**edit peptide**

{PIC}K(Methyl,Propionyl)S(Propionyl)APATGGVK(Methyl,Propionyl)K(Propionyl)P- align

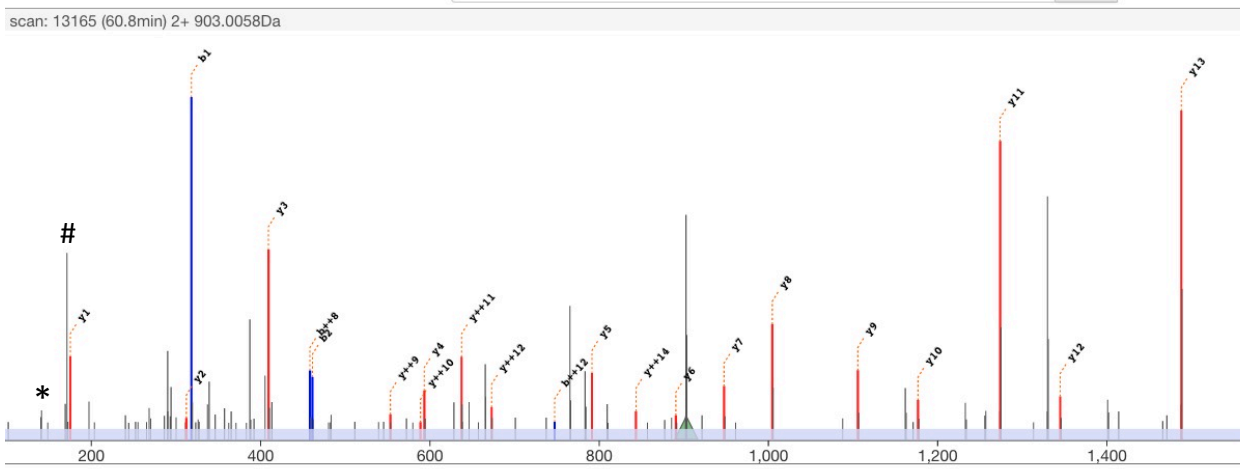

|    | b++    | b       |                    | y       | y++    |    |
|----|--------|---------|--------------------|---------|--------|----|
|    | 60.53  | 120.04  | PIC                | 1685.97 | 843.49 | 14 |
| 1  | 159.59 | 318.18  | Methyl,Propionyl K | 1487.83 | 744.42 | 13 |
| 2  | 231.12 | 461.24  | S(Propionyl)       | 1344.77 | 672.89 | 12 |
| 3  | 266.64 | 532.28  | A                  | 1273.74 | 637.37 | 11 |
| 4  | 315.17 | 629.33  | P                  | 1176.68 | 588.85 | 10 |
| 5  | 350.69 | 700.37  | A                  | 1105.65 | 553.33 | 9  |
| 6  | 401.21 | 801.41  | T                  | 1004.60 | 502.80 | 8  |
| 7  | 429.72 | 858.44  | G                  | 947.58  | 474.29 | 7  |
| 8  | 458.23 | 915.46  | V                  | 890.56  | 445.78 | 6  |
| 9  | 507.77 | 1014.53 | K                  | 791.49  | 396.25 | 5  |
| 10 | 606.83 | 1212.66 | Methyl,Propionyl K | 593.35  | 297.18 | 4  |
| 11 | 698.90 | 1396.78 | S(Propionyl) K     | 409.23  | 205.12 | 3  |
| 12 | 747.42 | 1493.84 | P                  | 312.18  | 156.59 | 2  |
| 13 | 815.95 | 1630.90 | H                  | 175.12  | 88.06  | 1  |
| 14 | 894.00 | 1787.00 | R                  |         |        |    |

\* = 140Da diagnostic ion  
 # = 171Da diagnostic ion



# H3.1\_K27-R40:

KMe2SAPATGGVKMe1KPHR

Overlaps with K27un,K36me3 (see page 243).

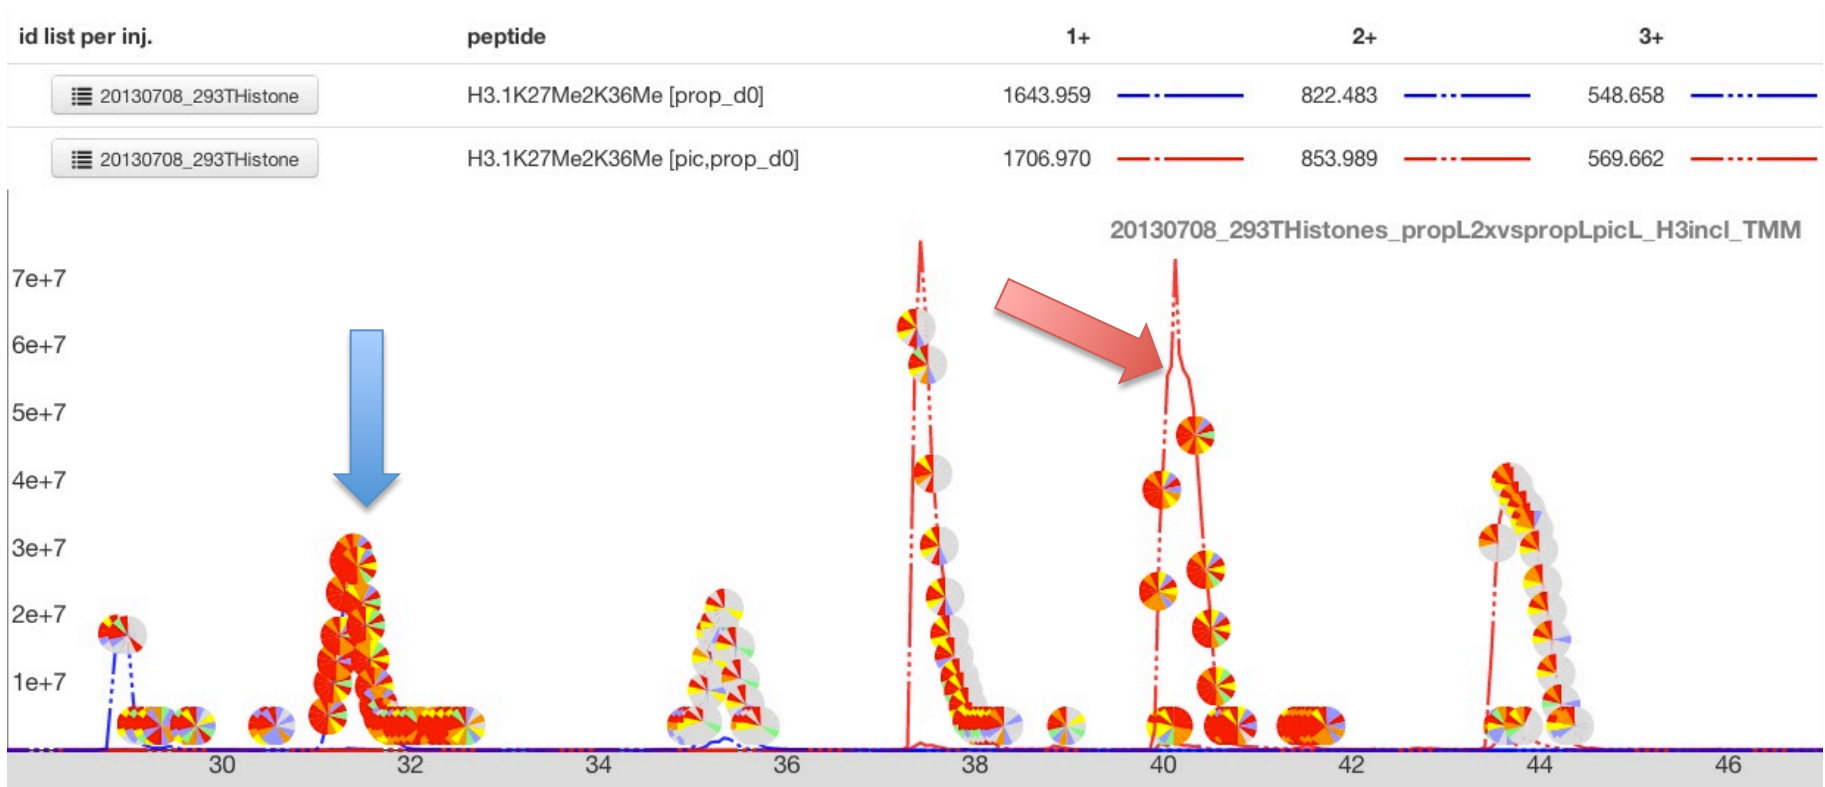

# H3.1\_K27-R40: KMe2SAPATGGVKMe1KPHR (Peak B & D)

20130708\_293THistones\_propL2xvpropLp... 7/8/2013 11:43:33 AM

6 of 10 ul, Histones RT: 23.31 - 50.59

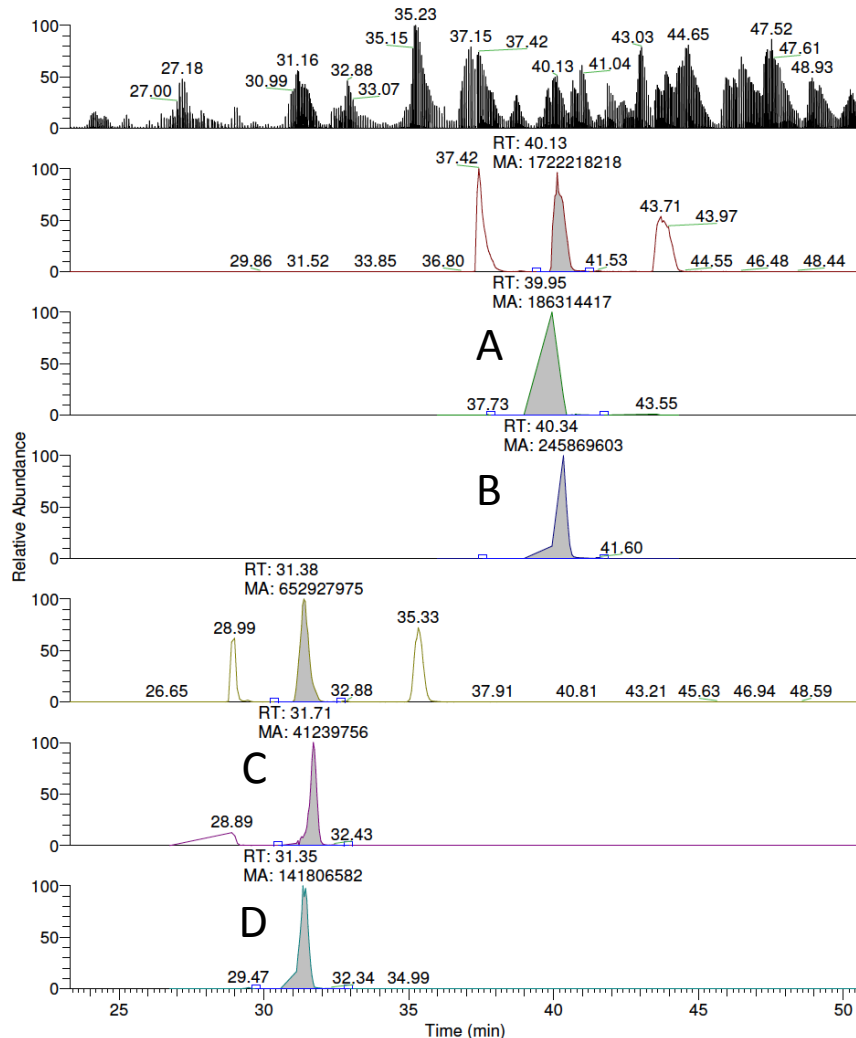

AUC calculation on MS2 level:  
XIC-PIC 569.66 (3+)  
791.49, 817.42, 916.49, 1004.60  
XIC-Prop 548.658 (3+)  
371.23, 754.41, 791.49, 853.48,  
1004.60

- A = K36Me3-peak PIC
- B = K27Me2K36Me1-peak PIC
- C = K36Me3-peak Prop
- D = K27Me2K36Me1-peak Prop

**Experimental spectrum**

scan 4485  
 retention time 31.4min  
 precursor m/z 548.6570  
 precursor charge 3+

**Theoretical**

M H<sup>3+</sup> 548.6579  
 MH Δ<sub>mass</sub> Da -0.0026  
 MH Δ<sub>mass</sub> ppm -1.6

**edit peptide**

{Propionyl}K{Dimethyl}SAPATGGVK{Methyl,Propionyl}K{Propionyl}PHR align

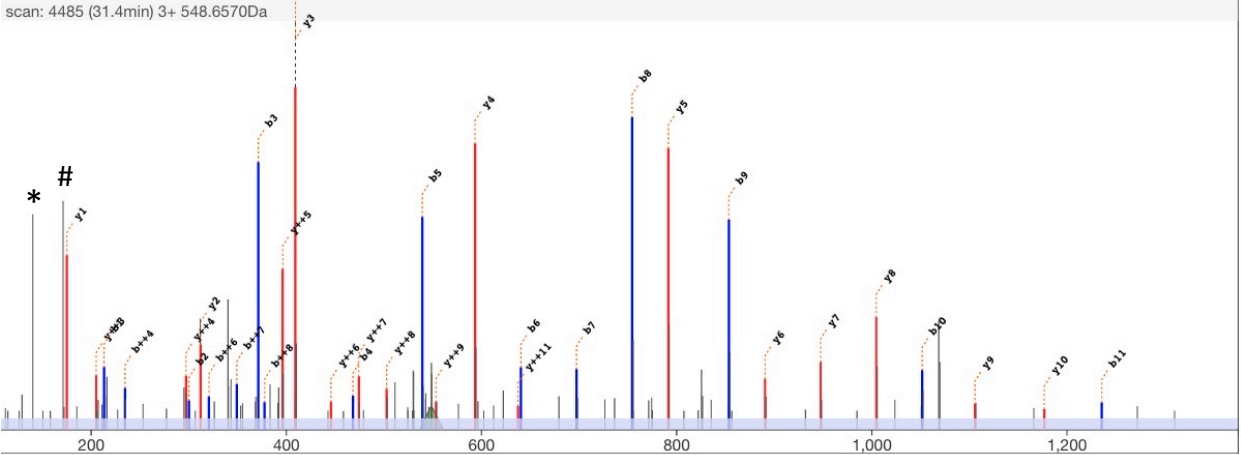

|    | b++    | b       |                  | y       | y++    |    |
|----|--------|---------|------------------|---------|--------|----|
|    |        |         | Propionyl        | 1587.93 | 794.47 | 14 |
| 1  | 107.08 | 213.16  | K                | 1431.81 | 716.41 | 13 |
| 2  | 150.60 | 300.19  | S                | 1344.77 | 672.89 | 12 |
| 3  | 186.12 | 371.23  | A                | 1273.74 | 637.37 | 11 |
| 4  | 234.64 | 468.28  | P                | 1176.68 | 588.85 | 10 |
| 5  | 270.16 | 539.32  | A                | 1105.65 | 553.33 | 9  |
| 6  | 320.69 | 640.37  | T                | 1004.60 | 502.80 | 8  |
| 7  | 349.20 | 697.39  | G                | 947.58  | 474.29 | 7  |
| 8  | 377.71 | 754.41  | V                | 890.56  | 445.78 | 6  |
| 9  | 427.24 | 853.48  | K                | 791.49  | 396.25 | 5  |
| 10 | 526.31 | 1051.61 | Methyl,Propionyl | 593.35  | 297.18 | 4  |
| 11 | 618.37 | 1235.74 | Propionyl        | 409.23  | 205.12 | 3  |
| 12 | 666.90 | 1332.79 | K                | 312.18  | 156.59 | 2  |
| 13 | 735.43 | 1469.85 | P                | 175.12  | 88.06  | 1  |
| 14 | 813.48 | 1625.95 | H                |         |        |    |

\* = 140Da diagnostic ion  
 # = 171Da diagnostic ion

**Experimental spectrum**

scan 6775  
 retention time 40.3min  
 precursor m/z 569.6603  
 precursor charge 3+

**Theoretical**

M H<sup>3+</sup> 569.6615  
 MH Δ<sub>mass</sub> Da -0.0036  
 MH Δ<sub>mass</sub> ppm -2.1

**edit peptide**

{PIC}K{Dimethyl}SAPATGGVK{Methyl,Propionyl}K{Propionyl}PHR

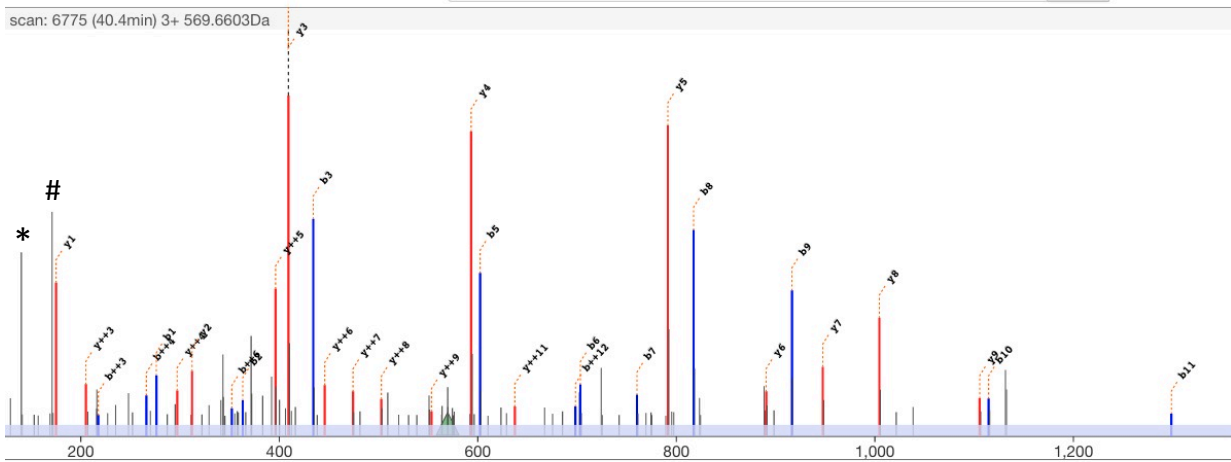

|    | b++    | b       |                  | y       | y++    |    |
|----|--------|---------|------------------|---------|--------|----|
|    | 60.53  | 120.04  | PIC              | 1587.93 | 794.47 | 14 |
| 1  | 138.59 | 276.17  | K                | 1431.81 | 716.41 | 13 |
|    |        |         | Dimethyl         |         |        |    |
| 2  | 182.10 | 363.20  | S                | 1344.77 | 672.89 | 12 |
| 3  | 217.62 | 434.24  | A                | 1273.74 | 637.37 | 11 |
| 4  | 266.15 | 531.29  | P                | 1176.68 | 588.85 | 10 |
| 5  | 301.67 | 602.33  | A                | 1105.65 | 553.33 | 9  |
| 6  | 352.19 | 703.38  | T                | 1004.60 | 502.80 | 8  |
| 7  | 380.70 | 760.40  | G                | 947.58  | 474.29 | 7  |
| 8  | 409.21 | 817.42  | V                | 890.56  | 445.78 | 6  |
| 9  | 458.75 | 916.49  | K                | 791.49  | 396.25 | 5  |
| 10 | 557.82 | 1114.63 | Methyl,Propionyl | 593.35  | 297.18 | 4  |
|    |        |         | K                |         |        |    |
| 11 | 649.88 | 1298.75 | Propionyl        | 409.23  | 205.12 | 3  |
| 12 | 698.40 | 1395.80 | P                | 312.18  | 156.59 | 2  |
| 13 | 766.93 | 1532.86 | H                | 175.12  | 88.06  | 1  |
|    |        |         | R                |         |        |    |
| 14 | 844.98 | 1688.96 |                  |         |        |    |

\* = 140Da diagnostic ion  
 # = 171Da diagnostic ion

# H3.1\_K27-R40:

KMe3SAPATGGVKMe1KPHR

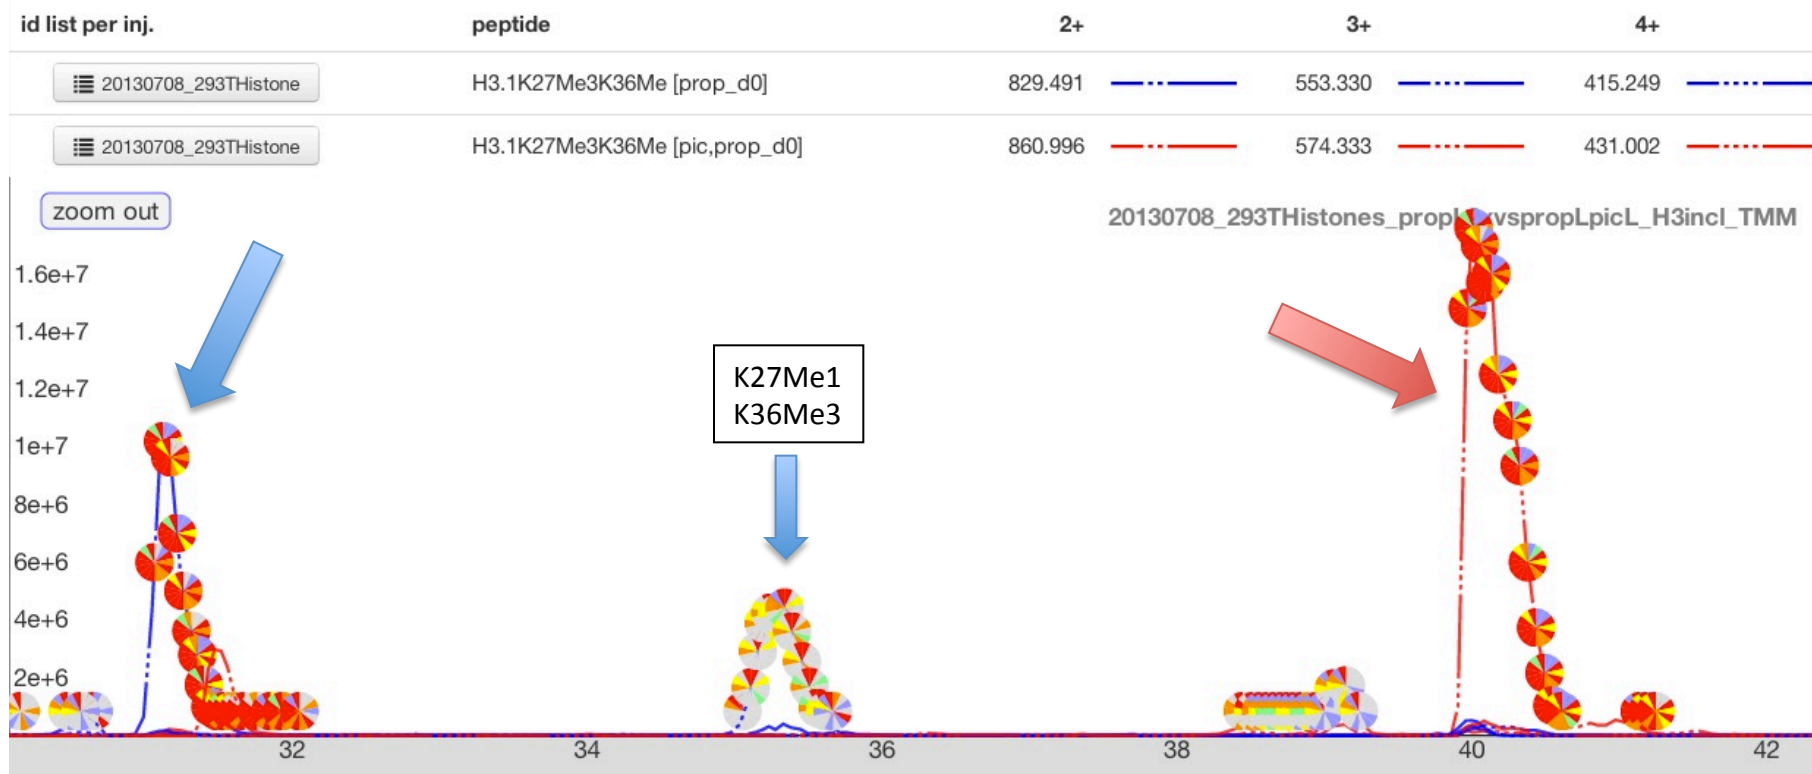

### Quanti event: 30.9-32.1min

| injection                                           | peptide                       | charge | m/z      | auc    |
|-----------------------------------------------------|-------------------------------|--------|----------|--------|
| 20130708_293THistones_propL2xvspropLpicL_H3incl_TMM | H3.1K27Me3K36Me [prop_d0]     | 2      | 829.4910 | 8.1e+5 |
| 20130708_293THistones_propL2xvspropLpicL_H3incl_TMM | H3.1K27Me3K36Me [pic,prop_d0] | 2      | 860.9965 | 0.0e+0 |
| 20130708_293THistones_propL2xvspropLpicL_H3incl_TMM | H3.1K27Me3K36Me [prop_d0]     | 3      | 553.3298 | 1.5e+8 |
| 20130708_293THistones_propL2xvspropLpicL_H3incl_TMM | H3.1K27Me3K36Me [pic,prop_d0] | 3      | 574.3334 | 3.9e+7 |
| 20130708_293THistones_propL2xvspropLpicL_H3incl_TMM | H3.1K27Me3K36Me [prop_d0]     | 4      | 415.2492 | 2.2e+6 |
| 20130708_293THistones_propL2xvspropLpicL_H3incl_TMM | H3.1K27Me3K36Me [pic,prop_d0] | 4      | 431.0019 | 0.0e+0 |

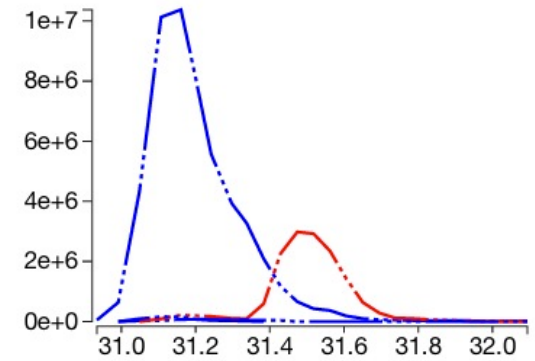

### Quanti event: 39.8-41.8min

| injection                                           | peptide                       | charge | m/z      | auc    |
|-----------------------------------------------------|-------------------------------|--------|----------|--------|
| 20130708_293THistones_propL2xvspropLpicL_H3incl_TMM | H3.1K27Me3K36Me [prop_d0]     | 2      | 829.4910 | 3.2e+6 |
| 20130708_293THistones_propL2xvspropLpicL_H3incl_TMM | H3.1K27Me3K36Me [pic,prop_d0] | 2      | 860.9965 | 3.4e+6 |
| 20130708_293THistones_propL2xvspropLpicL_H3incl_TMM | H3.1K27Me3K36Me [prop_d0]     | 3      | 553.3298 | 8.7e+6 |
| 20130708_293THistones_propL2xvspropLpicL_H3incl_TMM | H3.1K27Me3K36Me [pic,prop_d0] | 3      | 574.3334 | 4.1e+8 |
| 20130708_293THistones_propL2xvspropLpicL_H3incl_TMM | H3.1K27Me3K36Me [prop_d0]     | 4      | 415.2492 | 6.0e+6 |
| 20130708_293THistones_propL2xvspropLpicL_H3incl_TMM | H3.1K27Me3K36Me [pic,prop_d0] | 4      | 431.0019 | 9.1e+6 |

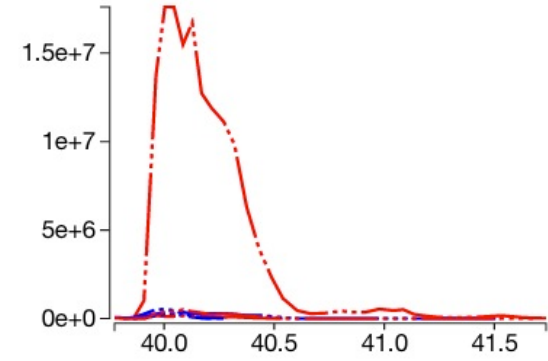

# H3.1\_K27-R40: Prop-KMe3SAPATGGVKMe1KPHR MS/MS

### Experimental spectrum

scan 4406  
 retention time 31.2min  
 precursor m/z 553.3295  
 precursor charge 3+

### Theoretical

M H<sup>3+</sup> 553.3298  
 MH Δ<sub>mass</sub> Da -0.0010  
 MH Δ<sub>mass</sub> ppm -0.6

### edit peptide

{Propionyl}K{Trimethyl}SAPATGGVK{Methyl,Propionyl}K{Propionyl}PHR

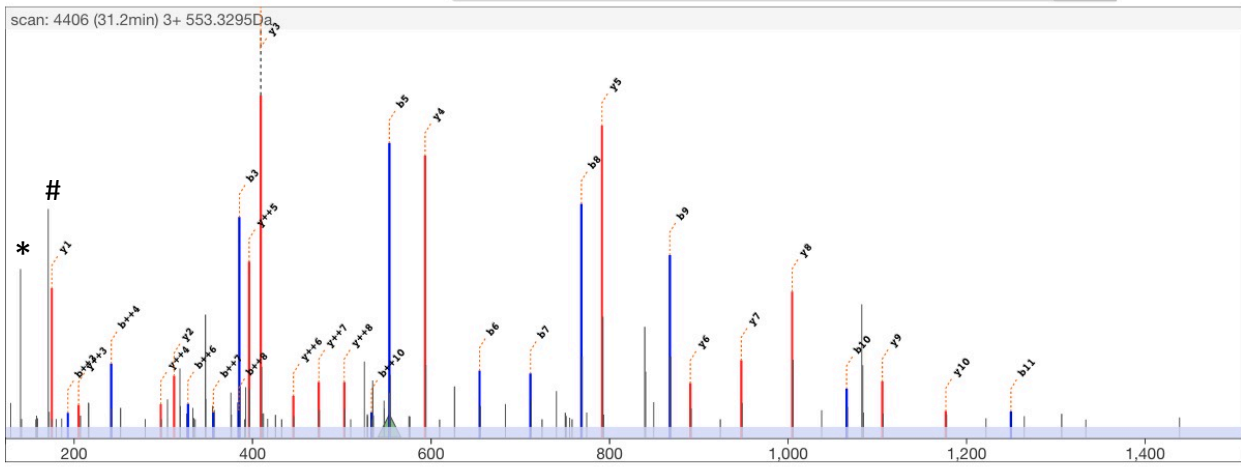

|    | b++    | b       |                  | y       | y++    |    |
|----|--------|---------|------------------|---------|--------|----|
|    |        |         | Propionyl        | 1601.95 | 801.48 | 14 |
| 1  | 114.09 | 227.18  | K                | 1431.81 | 716.41 | 13 |
|    |        |         | Trimethyl        | 1344.77 | 672.89 | 12 |
| 2  | 157.61 | 314.21  | S                | 1273.74 | 637.37 | 11 |
| 3  | 193.13 | 385.24  | A                | 1176.68 | 588.85 | 10 |
| 4  | 241.65 | 482.30  | P                | 1105.65 | 553.33 | 9  |
| 5  | 277.17 | 553.33  | A                | 1004.60 | 502.80 | 8  |
| 6  | 327.69 | 654.38  | T                | 947.58  | 474.29 | 7  |
| 7  | 356.21 | 711.40  | G                | 890.56  | 445.78 | 6  |
| 8  | 384.72 | 768.43  | V                | 791.49  | 396.25 | 5  |
| 9  | 434.25 | 867.49  | K                | 593.35  | 297.18 | 4  |
| 10 | 533.32 | 1065.63 | Methyl/Propionyl | 409.23  | 205.12 | 3  |
| 11 | 625.38 | 1249.75 | K                | 312.18  | 156.59 | 2  |
| 12 | 673.91 | 1346.80 | P                | 175.12  | 88.06  | 1  |
| 13 | 742.44 | 1483.86 | H                |         |        |    |
| 14 | 820.49 | 1639.96 | R                |         |        |    |

\* = 140Da diagnostic ion  
 # = 171Da diagnostic ion

# H3.1\_K27-R40: PIC-KMe3SAPATGGVKMe1KPHR MS/MS

**Experimental spectrum**

scan 6706  
 retention time 40.1min  
 precursor m/z 574.3304  
 precursor charge 3+

**Theoretical**

M H<sup>3+</sup> 574.3334  
 MH  $\Delta_{mass}$  Da -0.0089  
 MH  $\Delta_{mass}$  ppm -5.2

**edit peptide**

{PIC}K{Trimethyl}SAPATGGVK{Methyl,Propionyl}K{Propionyl}PHR align

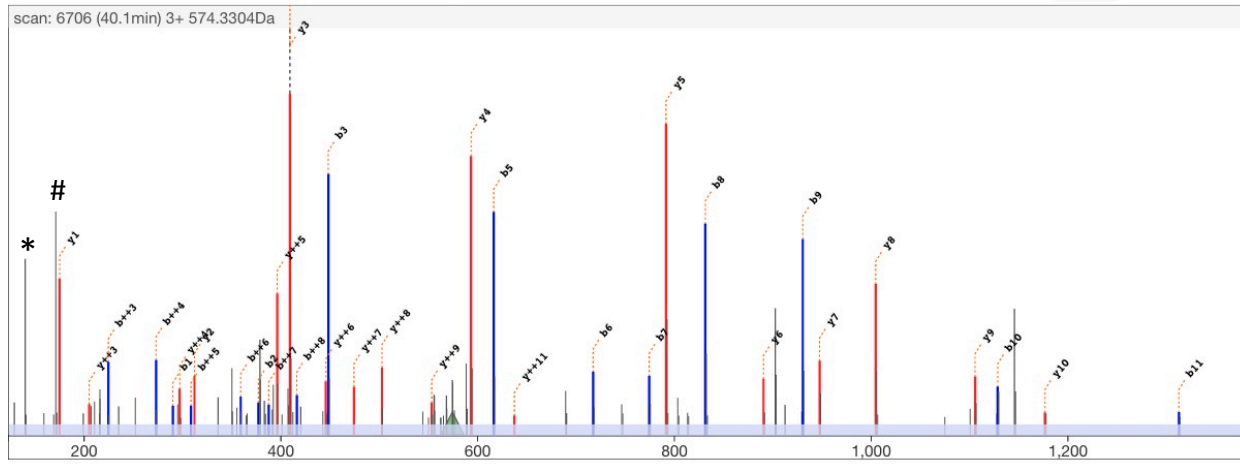

|    | b++    | b       |     | y       | y++    |    |
|----|--------|---------|-----|---------|--------|----|
|    | 60.53  | 120.04  | PIC | 1601.95 | 801.48 | 14 |
| 1  | 145.60 | 290.19  | K   | 1431.81 | 716.41 | 13 |
| 2  | 189.11 | 377.22  | S   | 1344.77 | 672.89 | 12 |
| 3  | 224.63 | 448.26  | A   | 1273.74 | 637.37 | 11 |
| 4  | 273.16 | 545.31  | P   | 1176.68 | 588.85 | 10 |
| 5  | 308.68 | 616.35  | A   | 1105.65 | 553.33 | 9  |
| 6  | 359.20 | 717.39  | T   | 1004.60 | 502.80 | 8  |
| 7  | 387.71 | 774.41  | G   | 947.58  | 474.29 | 7  |
| 8  | 416.22 | 831.44  | G   | 890.56  | 445.78 | 6  |
| 9  | 465.76 | 930.50  | V   | 791.49  | 396.25 | 5  |
| 10 | 564.82 | 1128.64 | K   | 593.35  | 297.18 | 4  |
| 11 | 656.88 | 1312.76 | K   | 409.23  | 205.12 | 3  |
| 12 | 705.41 | 1409.82 | P   | 312.18  | 156.59 | 2  |
| 13 | 773.94 | 1546.87 | H   | 175.12  | 88.06  | 1  |
| 14 | 851.99 | 1702.98 | R   |         |        |    |

\* = 140Da diagnostic ion  
 # = 171Da diagnostic ion



# H3.1\_K27-R40:

KMe3SProp?APATProp?GGVKMe1KPHR

Mainly T32-prop MS2 detected in PIC-labeling. T32-prop MS2 shown.

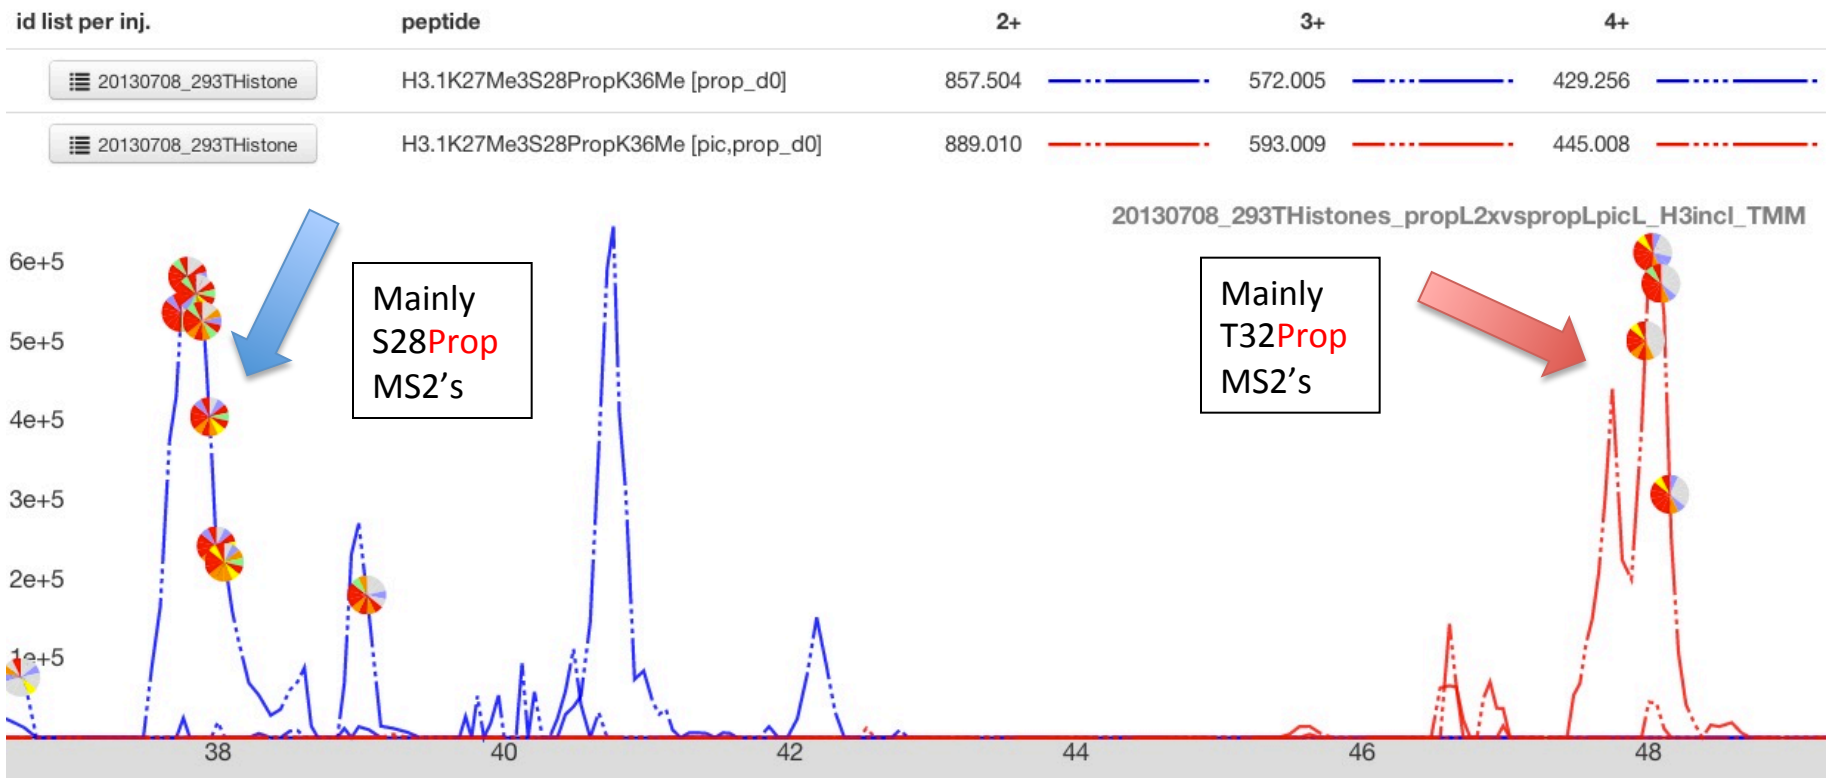

### Quanti event: 37.2-39.6min

| injection                                           | peptide                                 | charge | m/z      | auc    |
|-----------------------------------------------------|-----------------------------------------|--------|----------|--------|
| 20130708_293THistones_propL2xvspropLpicL_H3incl_TMM | H3.1K27Me3S28PropK36Me<br>[prop_d0]     | 2      | 857.5041 | 0.0e+0 |
| 20130708_293THistones_propL2xvspropLpicL_H3incl_TMM | H3.1K27Me3S28PropK36Me<br>[pic,prop_d0] | 2      | 889.0096 | 0.0e+0 |
| 20130708_293THistones_propL2xvspropLpicL_H3incl_TMM | H3.1K27Me3S28PropK36Me<br>[prop_d0]     | 3      | 572.0052 | 1.4e+7 |
| 20130708_293THistones_propL2xvspropLpicL_H3incl_TMM | H3.1K27Me3S28PropK36Me<br>[pic,prop_d0] | 3      | 593.0088 | 1.9e+4 |
| 20130708_293THistones_propL2xvspropLpicL_H3incl_TMM | H3.1K27Me3S28PropK36Me<br>[prop_d0]     | 4      | 429.2557 | 2.7e+5 |
| 20130708_293THistones_propL2xvspropLpicL_H3incl_TMM | H3.1K27Me3S28PropK36Me<br>[pic,prop_d0] | 4      | 445.0084 | 0.0e+0 |

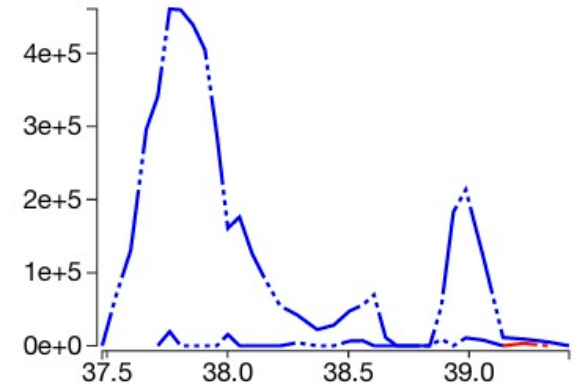

### Quanti event: 47.3-48.8min

| injection                                           | peptide                                 | charge | m/z      | auc    |
|-----------------------------------------------------|-----------------------------------------|--------|----------|--------|
| 20130708_293THistones_propL2xvspropLpicL_H3incl_TMM | H3.1K27Me3S28PropK36Me<br>[prop_d0]     | 2      | 857.5041 | 0.0e+0 |
| 20130708_293THistones_propL2xvspropLpicL_H3incl_TMM | H3.1K27Me3S28PropK36Me<br>[pic,prop_d0] | 2      | 889.0096 | 0.0e+0 |
| 20130708_293THistones_propL2xvspropLpicL_H3incl_TMM | H3.1K27Me3S28PropK36Me<br>[prop_d0]     | 3      | 572.0052 | 0.0e+0 |
| 20130708_293THistones_propL2xvspropLpicL_H3incl_TMM | H3.1K27Me3S28PropK36Me<br>[pic,prop_d0] | 3      | 593.0088 | 1.1e+7 |
| 20130708_293THistones_propL2xvspropLpicL_H3incl_TMM | H3.1K27Me3S28PropK36Me<br>[prop_d0]     | 4      | 429.2557 | 0.0e+0 |
| 20130708_293THistones_propL2xvspropLpicL_H3incl_TMM | H3.1K27Me3S28PropK36Me<br>[pic,prop_d0] | 4      | 445.0084 | 2.5e+5 |

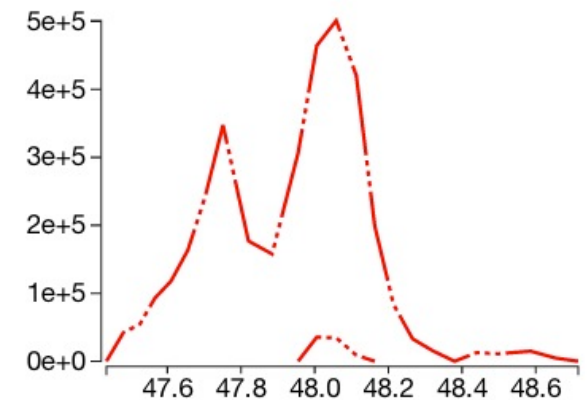

**Experimental spectrum**

scan 6397  
 retention time 39.0min  
 precursor m/z 572.0049  
 precursor charge 3+

**Theoretical**

M H<sup>3+</sup> 572.0052  
 MH Δ<sub>mass</sub> Da -0.0007  
 MH Δ<sub>mass</sub> ppm -0.4

**edit peptide**

{Propionyl}K{Trimethyl}SAPAT{Propionyl}GGVK{Methyl,Propionyl}K{Propionyl}PHR align

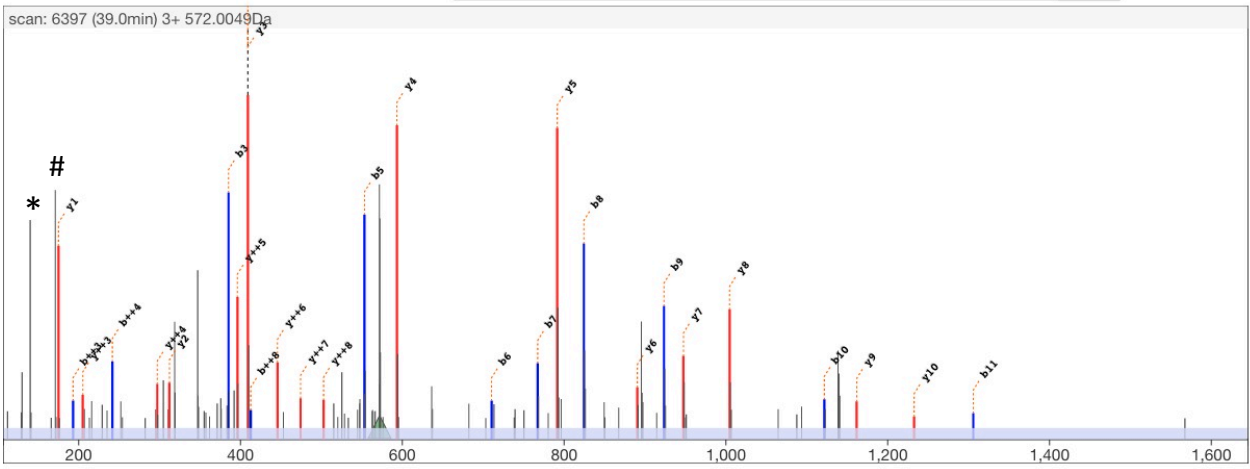

|    | b++    | b       |                  | y       | y++    |    |
|----|--------|---------|------------------|---------|--------|----|
|    |        |         | Propionyl        | 1657.97 | 829.49 | 14 |
| 1  | 114.09 | 227.18  | K                | 1487.83 | 744.42 | 13 |
|    |        |         | Trimethyl        | 1400.80 | 700.90 | 12 |
| 2  | 157.61 | 314.21  | S                | 1329.76 | 665.39 | 11 |
| 3  | 193.13 | 385.24  | A                | 1232.71 | 616.86 | 10 |
| 4  | 241.65 | 482.30  | P                | 1161.67 | 581.34 | 9  |
| 5  | 277.17 | 553.33  | T                | 1004.60 | 502.80 | 8  |
| 6  | 355.71 | 710.41  | Propionyl        | 947.58  | 474.29 | 7  |
| 7  | 384.22 | 767.43  | G                | 890.56  | 445.78 | 6  |
| 8  | 412.73 | 824.45  | V                | 824.45  | 445.78 | 6  |
| 9  | 462.26 | 923.52  | G                | 791.49  | 396.25 | 5  |
| 10 | 561.33 | 1121.66 | Methyl,Propionyl | 593.35  | 297.18 | 4  |
| 11 | 653.39 | 1305.78 | K                | 409.23  | 205.12 | 3  |
| 12 | 701.92 | 1402.83 | Propionyl        | 312.18  | 156.59 | 2  |
| 13 | 770.45 | 1539.89 | P                | 175.12  | 88.06  | 1  |
| 14 | 848.50 | 1695.99 | H                |         |        |    |
|    |        |         | R                |         |        |    |

\* = 140Da diagnostic ion  
 # = 171Da diagnostic ion

**Experimental spectrum**

scan 9097  
 retention time 48.0min  
 precursor m/z 593.0077  
 precursor charge 3+

**Theoretical**

MH<sup>3+</sup> 593.0088  
 MH Δ<sub>mass</sub> Da -0.0034  
 MH Δ<sub>mass</sub> ppm -1.9

**edit peptide**

{PIC}K{Trimethyl}SAPAT{Propionyl}GGVK{Methyl,Propionyl}K{Propionyl}PHR align

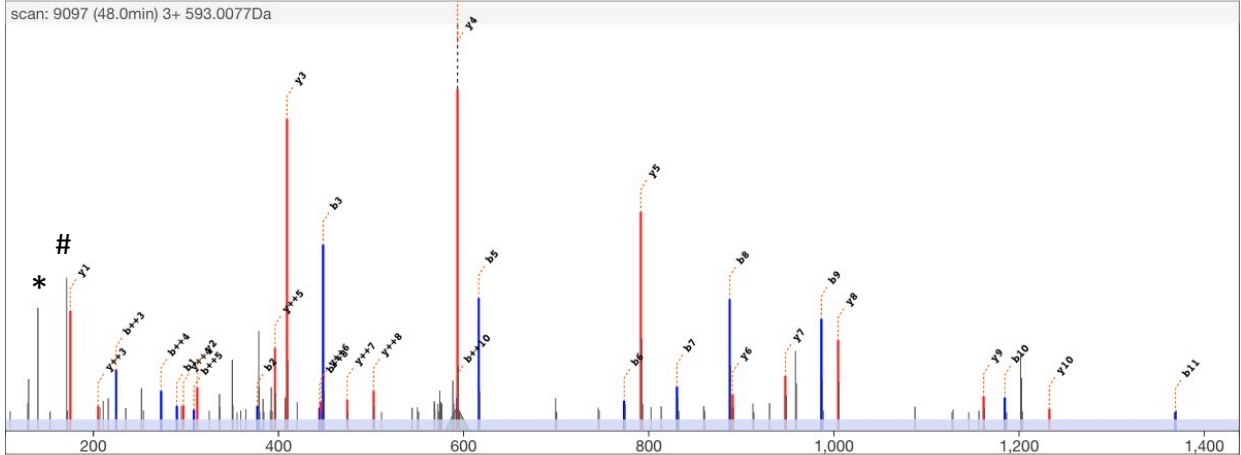

|    | b++    | b       |     | y       | y++    |    |
|----|--------|---------|-----|---------|--------|----|
|    | 60.53  | 120.04  | PIC | 1657.97 | 829.49 | 14 |
| 1  | 145.60 | 290.19  | K   | 1487.83 | 744.42 | 13 |
| 2  | 189.11 | 377.22  | S   | 1400.80 | 700.90 | 12 |
| 3  | 224.63 | 448.26  | A   | 1329.76 | 665.39 | 11 |
| 4  | 273.16 | 545.31  | P   | 1232.71 | 616.86 | 10 |
| 5  | 308.68 | 616.35  | A   | 1161.67 | 581.34 | 9  |
| 6  | 387.21 | 773.42  | T   | 1004.60 | 502.80 | 8  |
| 7  | 415.72 | 830.44  | G   | 947.58  | 474.29 | 7  |
| 8  | 444.23 | 887.46  | V   | 890.56  | 445.78 | 6  |
| 9  | 493.77 | 986.53  | K   | 791.49  | 396.25 | 5  |
| 10 | 592.84 | 1184.67 | K   | 593.35  | 297.18 | 4  |
| 11 | 684.90 | 1368.79 | K   | 409.23  | 205.12 | 3  |
| 12 | 733.42 | 1465.84 | P   | 312.18  | 156.59 | 2  |
| 13 | 801.95 | 1602.90 | H   | 175.12  | 88.06  | 1  |
| 14 | 880.00 | 1759.00 | R   |         |        |    |

\* = 140Da diagnostic ion  
 # = 171Da diagnostic ion

# H3.1\_K27-R40:

## KAcSAPATGGVKMe1KPHR

H3.1K27AcK36Me1 runs in end of peak for H3.1K27unmodified. Mixed MS2s, calculation via MS2 level.

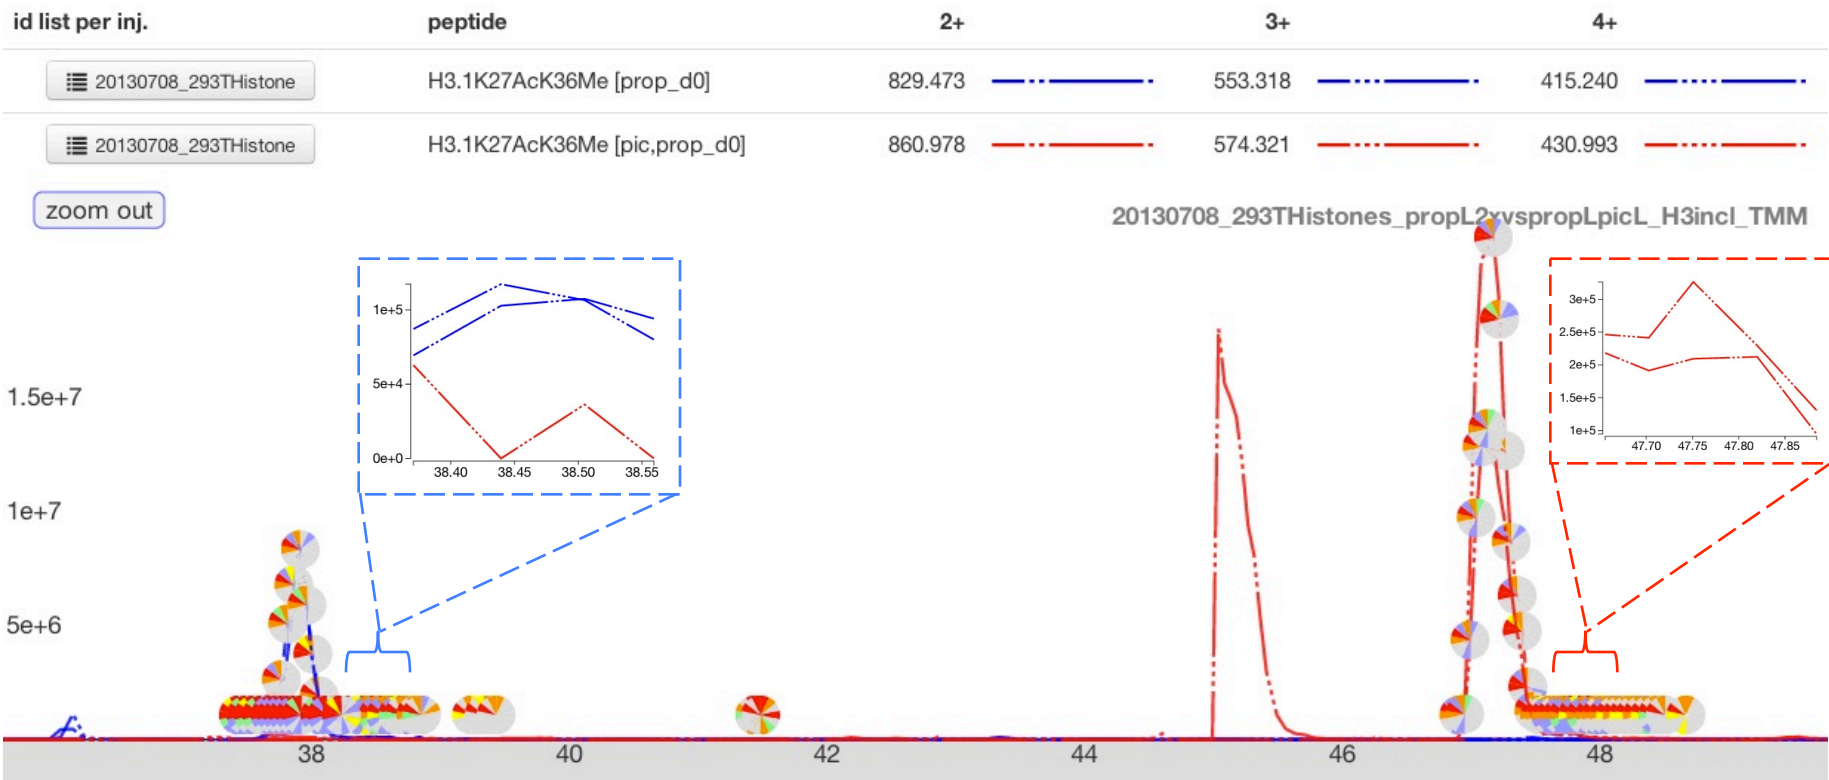

# H3.1\_K27-R40: KAcSAPATGGVKMe1KPHR (Peak B & D)

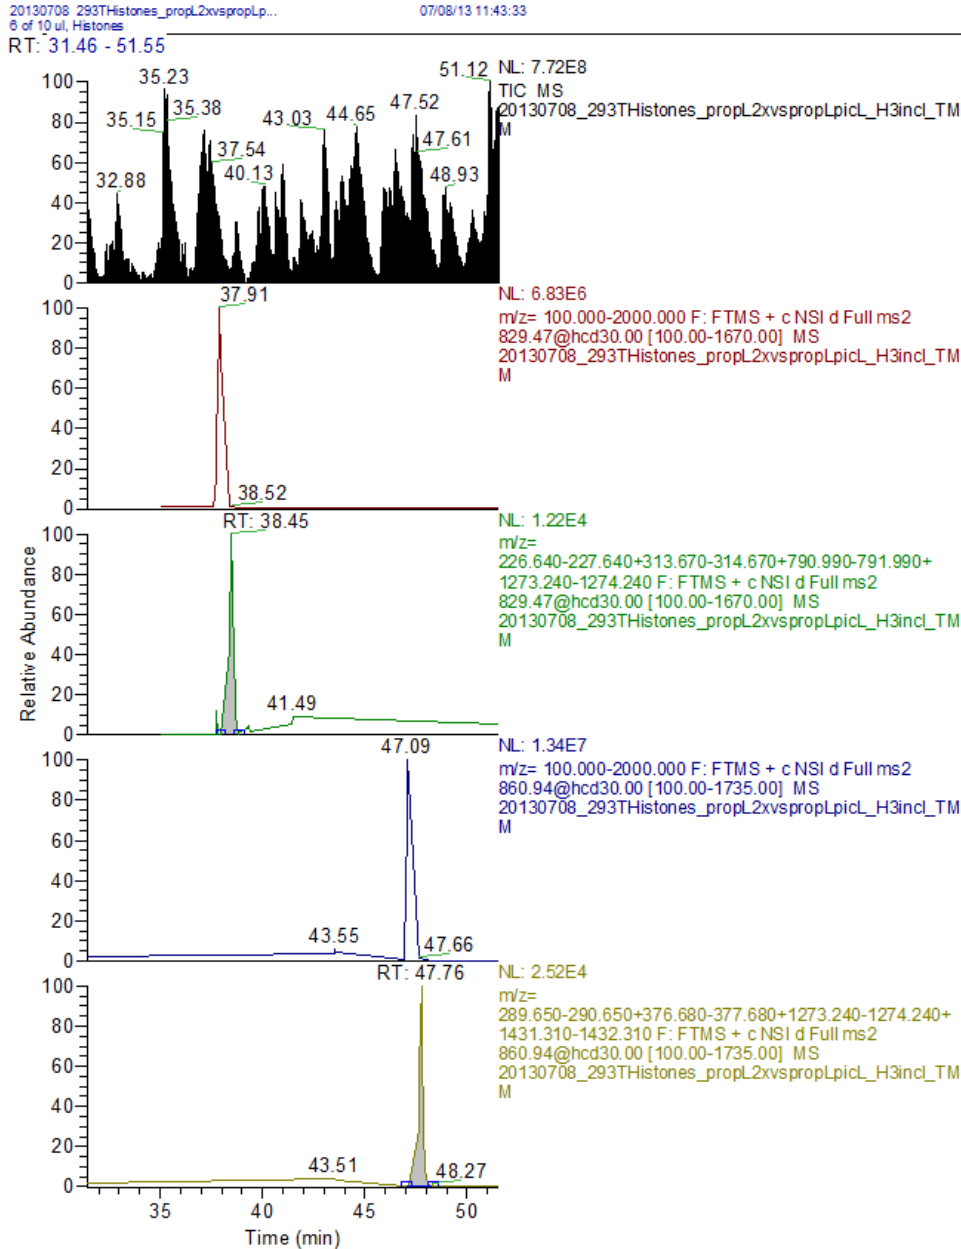

AUC calculation on MS2 level:

XIC-PIC 829.472 (2+)

227.14, 314.17, 1273.74, 1431.81

XIC-Prop 860.976 (2+)

290.15, 377.18, 1273.74, 1431.81

A = K27AcK36Me1-peak Prop

B = K27AcK36Me1-peak PIC

### Quanti event: 38.4-38.6min

| injection                                           | peptide                      | charge | m/z      | auc    |
|-----------------------------------------------------|------------------------------|--------|----------|--------|
| 20130708_293THistones_propL2xvspropLpicL_H3incl_TMM | H3.1K27AcK36Me [prop_d0]     | 2      | 829.4728 | 1.1e+6 |
| 20130708_293THistones_propL2xvspropLpicL_H3incl_TMM | H3.1K27AcK36Me [pic,prop_d0] | 2      | 860.9783 | 0.0e+0 |
| 20130708_293THistones_propL2xvspropLpicL_H3incl_TMM | H3.1K27AcK36Me [prop_d0]     | 3      | 553.3177 | 1.2e+6 |
| 20130708_293THistones_propL2xvspropLpicL_H3incl_TMM | H3.1K27AcK36Me [pic,prop_d0] | 3      | 574.3213 | 2.6e+5 |
| 20130708_293THistones_propL2xvspropLpicL_H3incl_TMM | H3.1K27AcK36Me [prop_d0]     | 4      | 415.2401 | 0.0e+0 |
| 20130708_293THistones_propL2xvspropLpicL_H3incl_TMM | H3.1K27AcK36Me [pic,prop_d0] | 4      | 430.9928 | 0.0e+0 |

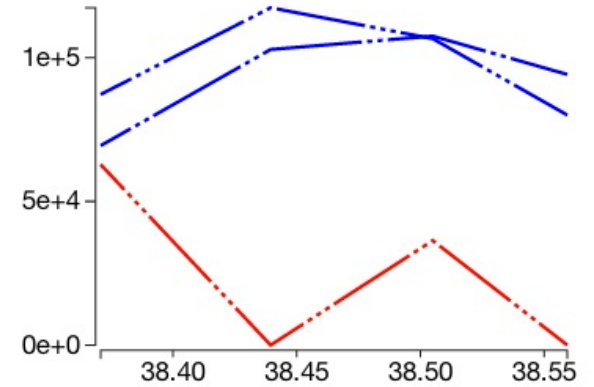

### Quanti event: 47.6-47.9min

| injection                                           | peptide                      | charge | m/z      | auc    |
|-----------------------------------------------------|------------------------------|--------|----------|--------|
| 20130708_293THistones_propL2xvspropLpicL_H3incl_TMM | H3.1K27AcK36Me [prop_d0]     | 2      | 829.4728 | 0.0e+0 |
| 20130708_293THistones_propL2xvspropLpicL_H3incl_TMM | H3.1K27AcK36Me [pic,prop_d0] | 2      | 860.9783 | 2.6e+6 |
| 20130708_293THistones_propL2xvspropLpicL_H3incl_TMM | H3.1K27AcK36Me [prop_d0]     | 3      | 553.3177 | 0.0e+0 |
| 20130708_293THistones_propL2xvspropLpicL_H3incl_TMM | H3.1K27AcK36Me [pic,prop_d0] | 3      | 574.3213 | 3.4e+6 |
| 20130708_293THistones_propL2xvspropLpicL_H3incl_TMM | H3.1K27AcK36Me [prop_d0]     | 4      | 415.2401 | 0.0e+0 |
| 20130708_293THistones_propL2xvspropLpicL_H3incl_TMM | H3.1K27AcK36Me [pic,prop_d0] | 4      | 430.9928 | 0.0e+0 |

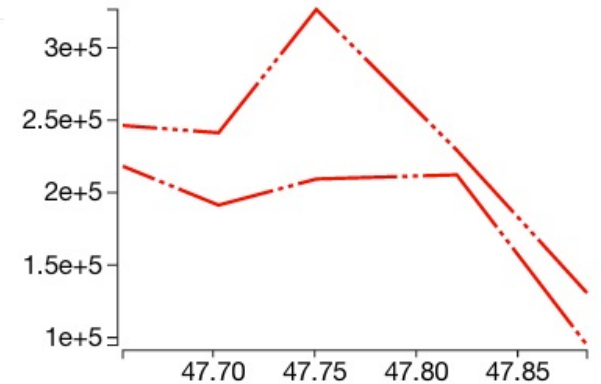

# H3.1\_K27-R40: Prop-KAcSAPATGGVKMe1KPHR MS/MS

**Experimental spectrum**

scan 6211  
 retention time 38.4min  
 precursor m/z 829.4722  
 precursor charge 2+

**Theoretical**

M H<sup>2+</sup> 829.4728  
 MH Δ<sub>mass</sub> Da -0.0014  
 MH Δ<sub>mass</sub> ppm -0.8

**edit peptide**

{Propionyl}K{Acetyl}SAPATGGVK{Methyl,Propionyl}K{Propionyl}PHR align

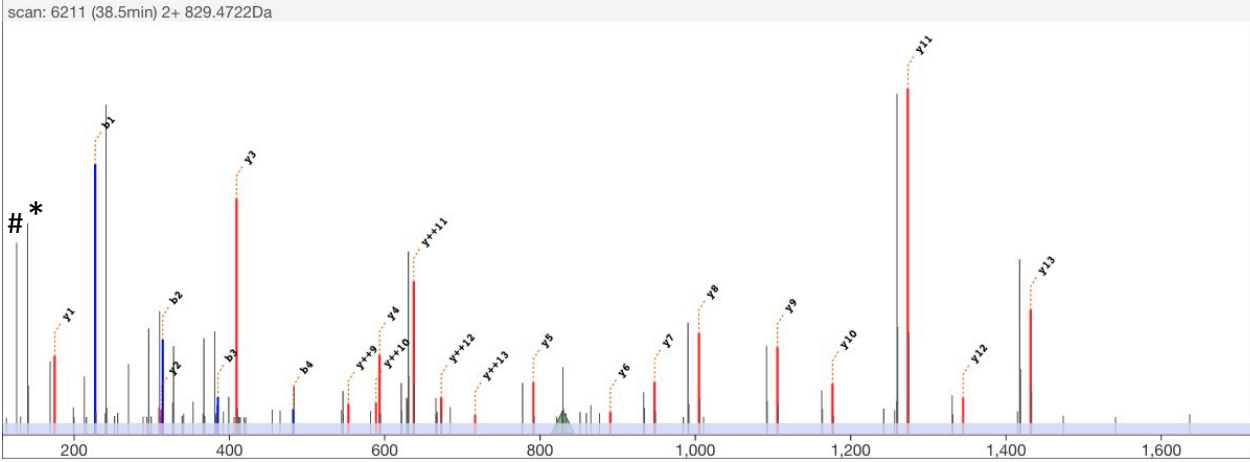

|    | b++    | b       | y       | y++    |    |
|----|--------|---------|---------|--------|----|
|    |        |         | 1601.91 | 801.46 | 14 |
| 1  | 114.07 | 227.14  | 1431.81 | 716.41 | 13 |
| 2  | 157.59 | 314.17  | 1344.77 | 672.89 | 12 |
| 3  | 193.11 | 385.21  | 1273.74 | 637.37 | 11 |
| 4  | 241.63 | 482.26  | 1176.68 | 588.85 | 10 |
| 5  | 277.15 | 553.30  | 1105.65 | 553.33 | 9  |
| 6  | 327.68 | 654.35  | 1004.60 | 502.80 | 8  |
| 7  | 356.19 | 711.37  | 947.58  | 474.29 | 7  |
| 8  | 384.70 | 768.39  | 890.56  | 445.78 | 6  |
| 9  | 434.23 | 867.46  | 791.49  | 396.25 | 5  |
| 10 | 533.30 | 1065.59 | 593.35  | 297.18 | 4  |
| 11 | 625.36 | 1249.72 | 409.23  | 205.12 | 3  |
| 12 | 673.89 | 1346.77 | 312.18  | 156.59 | 2  |
| 13 | 742.42 | 1483.83 | 175.12  | 88.06  | 1  |
| 14 | 820.47 | 1639.93 |         |        |    |

\* = 140Da diagnostic ion  
 # = 126Da diagnostic ion



# H3.1\_K27-R40: PIC-KAcSAPATGGVKMe1KPHR MS/MS

### Experimental spectrum

scan 9027  
 retention time 47.8min  
 precursor m/z 860.9761  
 precursor charge 2+

### Theoretical

M H<sup>2+</sup> 860.9783  
 MH Δ<sub>mass</sub> Da -0.0043  
 MH Δ<sub>mass</sub> ppm -2.5

### edit peptide

{PIC}K{Acetyl}SAPATGGVK{Methyl,Propionyl}K{Propionyl}PHR

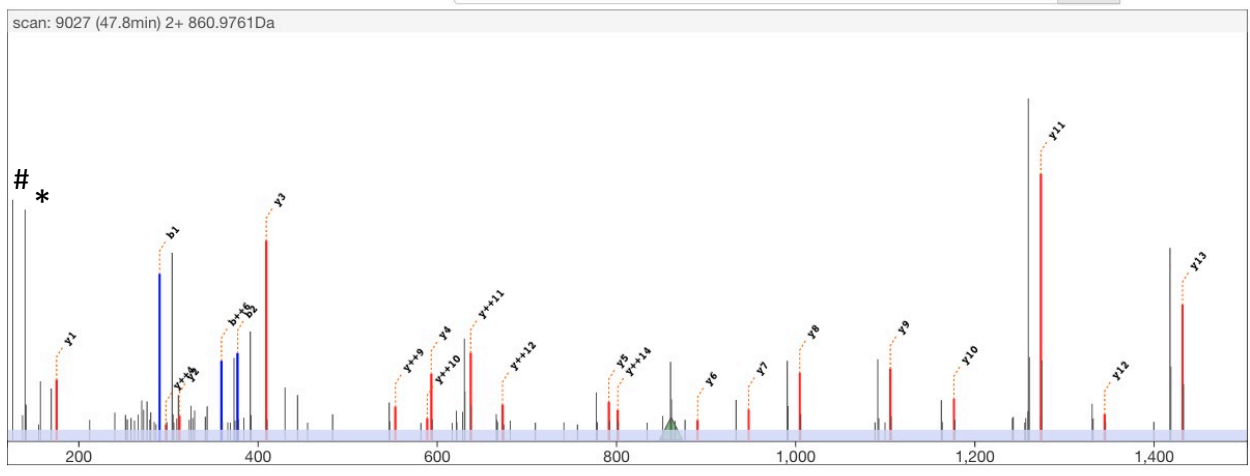

|    | b++    | b       |                  | y       | y++    |    |
|----|--------|---------|------------------|---------|--------|----|
|    | 60.53  | 120.04  | PIC              | 1601.91 | 801.46 | 14 |
| 1  | 145.58 | 290.15  | K                | 1431.81 | 716.41 | 13 |
| 2  | 189.09 | 377.18  | Acetyl           | 1344.77 | 672.89 | 12 |
| 3  | 224.61 | 448.22  | S                | 1273.74 | 637.37 | 11 |
| 4  | 273.14 | 545.27  | A                | 1176.68 | 588.85 | 10 |
| 5  | 308.66 | 616.31  | P                | 1105.65 | 553.33 | 9  |
| 6  | 359.18 | 717.36  | A                | 1004.60 | 502.80 | 8  |
| 7  | 387.69 | 774.38  | T                | 947.58  | 474.29 | 7  |
| 8  | 416.20 | 831.40  | G                | 890.56  | 445.78 | 6  |
| 9  | 465.74 | 930.47  | V                | 791.49  | 396.25 | 5  |
| 10 | 564.81 | 1128.60 | K                | 593.35  | 297.18 | 4  |
| 11 | 656.87 | 1312.73 | Methyl,Propionyl | 409.23  | 205.12 | 3  |
| 12 | 705.39 | 1409.78 | Propionyl        | 312.18  | 156.59 | 2  |
| 13 | 773.92 | 1546.84 | P                | 175.12  | 88.06  | 1  |
| 14 | 851.97 | 1702.94 | H                |         |        |    |
|    |        |         | R                |         |        |    |

\* = 140Da diagnostic ion  
 # = 126Da diagnostic ion

# H3.1\_K27-R40:

## KMe1SAPATGGVKMe2KPHR

| id list per inj.     | peptide                       | 2+      | 3+      | 4+      |
|----------------------|-------------------------------|---------|---------|---------|
| 20130708_293THistone | H3.1K27MeK36Me2 [prop_d0]     | 822.483 | 548.658 | 411.745 |
| 20130708_293THistone | H3.1K27MeK36Me2 [pic,prop_d0] | 853.989 | 569.662 | 427.498 |

zoom out

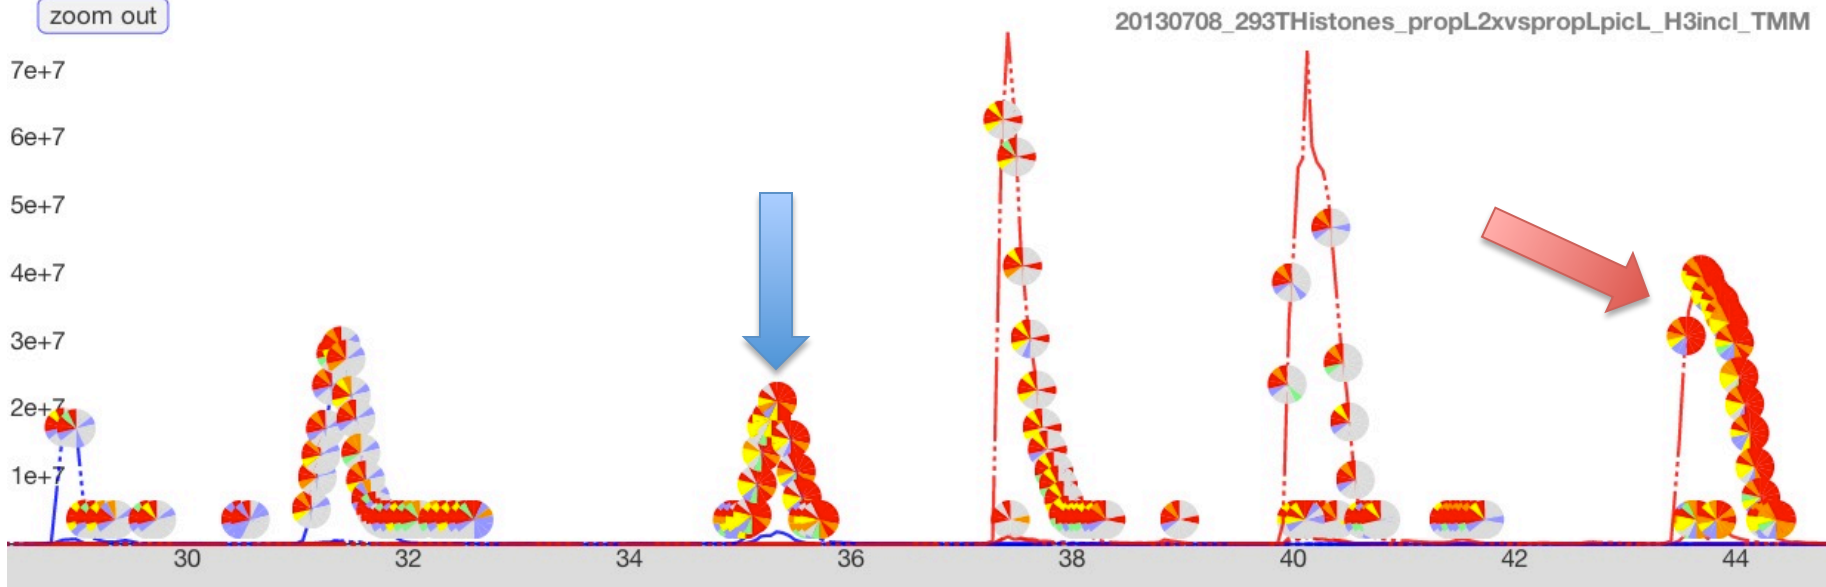

Quanti event: 34.8-36.3min

| injection                                           | peptide                       | charge | m/z      | auc    |
|-----------------------------------------------------|-------------------------------|--------|----------|--------|
| 20130708_293THistones_propL2xvspropLpicL_H3incl_TMM | H3.1K27MeK36Me2 [prop_d0]     | 2      | 822.4832 | 3.3e+7 |
| 20130708_293THistones_propL2xvspropLpicL_H3incl_TMM | H3.1K27MeK36Me2 [pic,prop_d0] | 2      | 853.9887 | 0.0e+0 |
| 20130708_293THistones_propL2xvspropLpicL_H3incl_TMM | H3.1K27MeK36Me2 [prop_d0]     | 3      | 548.6579 | 4.5e+8 |
| 20130708_293THistones_propL2xvspropLpicL_H3incl_TMM | H3.1K27MeK36Me2 [pic,prop_d0] | 3      | 569.6615 | 0.0e+0 |
| 20130708_293THistones_propL2xvspropLpicL_H3incl_TMM | H3.1K27MeK36Me2 [prop_d0]     | 4      | 411.7452 | 0.0e+0 |
| 20130708_293THistones_propL2xvspropLpicL_H3incl_TMM | H3.1K27MeK36Me2 [pic,prop_d0] | 4      | 427.4980 | 1.4e+5 |

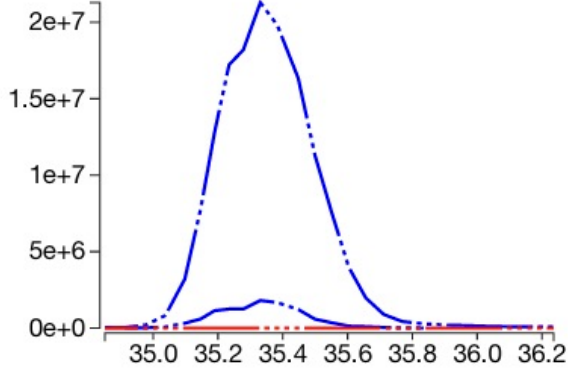

Quanti event: 43.1-45.5min

| injection                                           | peptide                       | charge | m/z      | auc    |
|-----------------------------------------------------|-------------------------------|--------|----------|--------|
| 20130708_293THistones_propL2xvspropLpicL_H3incl_TMM | H3.1K27MeK36Me2 [prop_d0]     | 2      | 822.4832 | 5.4e+5 |
| 20130708_293THistones_propL2xvspropLpicL_H3incl_TMM | H3.1K27MeK36Me2 [pic,prop_d0] | 2      | 853.9887 | 5.3e+7 |
| 20130708_293THistones_propL2xvspropLpicL_H3incl_TMM | H3.1K27MeK36Me2 [prop_d0]     | 3      | 548.6579 | 1.4e+5 |
| 20130708_293THistones_propL2xvspropLpicL_H3incl_TMM | H3.1K27MeK36Me2 [pic,prop_d0] | 3      | 569.6615 | 1.4e+9 |
| 20130708_293THistones_propL2xvspropLpicL_H3incl_TMM | H3.1K27MeK36Me2 [prop_d0]     | 4      | 411.7452 | 0.0e+0 |
| 20130708_293THistones_propL2xvspropLpicL_H3incl_TMM | H3.1K27MeK36Me2 [pic,prop_d0] | 4      | 427.4980 | 2.4e+5 |

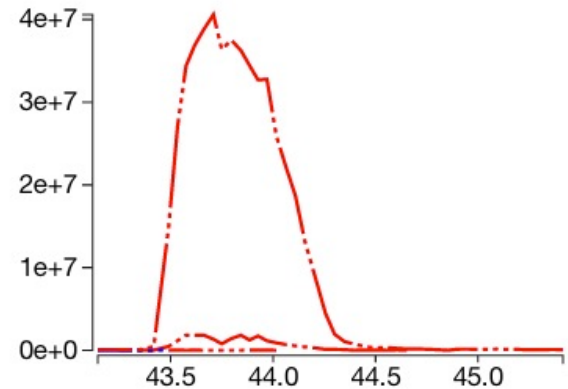

# H3.1\_K27-R40: Prop-KMe1SAPATGGVKMe2KPHR MS/MS

### Experimental spectrum

scan 5524  
 retention time 35.6min  
 precursor m/z 548.6558  
 precursor charge 3+

### Theoretical

M H<sup>3+</sup> 548.6579  
 MH Δ<sub>mass</sub> Da -0.0062  
 MH Δ<sub>mass</sub> ppm -3.8

### edit peptide

{Propionyl}K{Methyl,Propionyl}SAPATGGVK{Dimethyl}K{Propionyl}PHR align

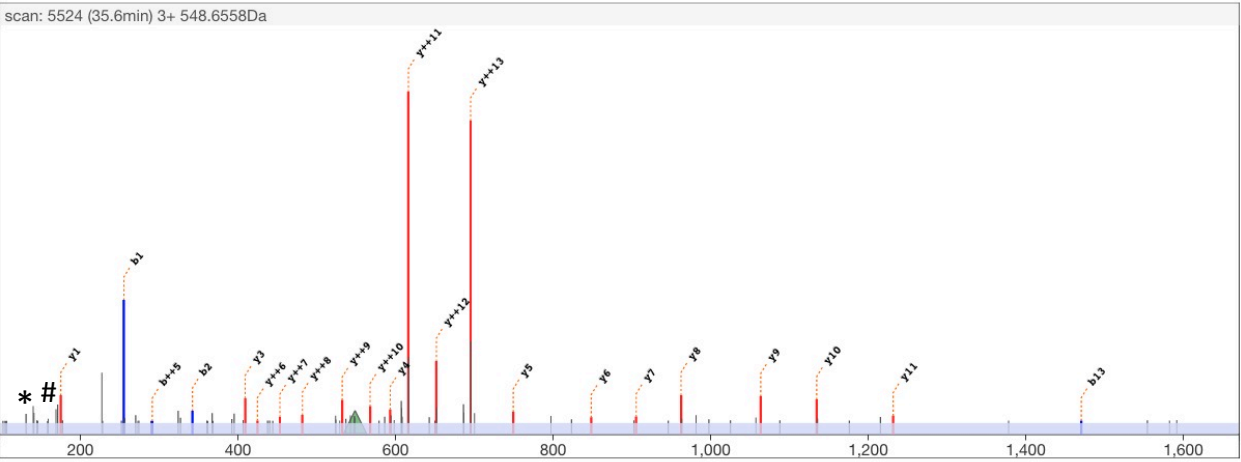

|    | b++    | b       |           | y       | y++    |    |
|----|--------|---------|-----------|---------|--------|----|
|    |        |         | Propionyl | 1587.93 | 794.47 | 14 |
| 1  | 128.09 | 255.17  | K         | 1389.80 | 695.40 | 13 |
| 2  | 171.60 | 342.20  | S         | 1302.76 | 651.89 | 12 |
| 3  | 207.12 | 413.24  | A         | 1231.73 | 616.37 | 11 |
| 4  | 255.65 | 510.29  | P         | 1134.67 | 567.84 | 10 |
| 5  | 291.17 | 581.33  | A         | 1063.64 | 532.32 | 9  |
| 6  | 341.69 | 682.38  | T         | 962.59  | 481.80 | 8  |
| 7  | 370.20 | 739.40  | G         | 905.57  | 453.29 | 7  |
| 8  | 398.71 | 796.42  | V         | 848.55  | 424.78 | 6  |
| 9  | 448.25 | 895.49  | K         | 749.48  | 375.24 | 5  |
| 10 | 526.31 | 1051.61 | Dimethyl  | 593.35  | 297.18 | 4  |
| 11 | 618.37 | 1235.74 | Propionyl | 409.23  | 205.12 | 3  |
| 12 | 666.90 | 1332.79 | P         | 312.18  | 156.59 | 2  |
| 13 | 735.43 | 1469.85 | H         | 175.12  | 88.06  | 1  |
| 14 | 813.48 | 1625.95 | R         |         |        |    |

\* = 140Da diagnostic ion  
 # = 171Da diagnostic ion

# H3.1\_K27-R40: PIC-KMe1SAPATGGVKMe2KPHR MS/MS

**Experimental spectrum**

scan 7829  
 retention time 43.9min  
 precursor m/z 569.6609  
 precursor charge 3+

**Theoretical**

M H<sup>3+</sup> 569.6615  
 MH Δ<sub>mass</sub> Da -0.0018  
 MH Δ<sub>mass</sub> ppm -1.0

**edit peptide**

{PIC}K{Methyl,Propionyl}SAPATGGVK{Dimethyl}K{Propionyl}PHR

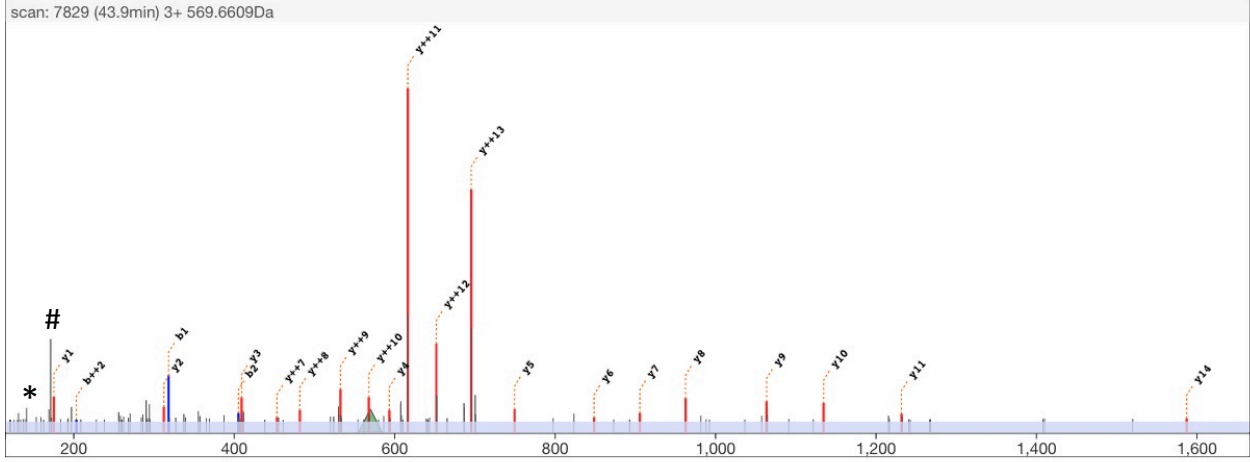

|    | b++    | b       |                  | y       | y++    |    |
|----|--------|---------|------------------|---------|--------|----|
|    | 60.53  | 120.04  | PIC              | 1587.93 | 794.47 | 14 |
| 1  | 159.59 | 318.18  | K                | 1389.80 | 695.40 | 13 |
| 2  | 203.11 | 405.21  | Methyl,Propionyl | 1302.76 | 651.89 | 12 |
| 3  | 238.63 | 476.25  | S                | 1231.73 | 616.37 | 11 |
| 4  | 287.16 | 573.30  | A                | 1134.67 | 567.84 | 10 |
| 5  | 322.67 | 644.34  | P                | 1063.64 | 532.32 | 9  |
| 6  | 373.20 | 745.39  | A                | 962.59  | 481.80 | 8  |
| 7  | 401.71 | 802.41  | T                | 905.57  | 453.29 | 7  |
| 8  | 430.22 | 859.43  | G                | 848.55  | 424.78 | 6  |
| 9  | 479.75 | 958.50  | V                | 749.48  | 375.24 | 5  |
| 10 | 557.82 | 1114.63 | K                | 593.35  | 297.18 | 4  |
| 11 | 649.88 | 1298.75 | Dimethyl         | 409.23  | 205.12 | 3  |
| 12 | 698.40 | 1395.80 | K                | 312.18  | 156.59 | 2  |
| 13 | 766.93 | 1532.86 | Propionyl        | 175.12  | 88.06  | 1  |
| 14 | 844.98 | 1688.96 | P                |         |        |    |
|    |        |         | H                |         |        |    |
|    |        |         | R                |         |        |    |

\* = 140Da diagnostic ion  
 # = 171Da diagnostic ion

# H3.1\_K27-R40:

KMe1SProp?APATProp?GGVKMe2KPHR

Mainly S28-prop MS2 detected in PIC-labeling. S28-prop MS2 shown.

| id list per inj.     | peptide                              | 2+      | 3+      | 4+      |
|----------------------|--------------------------------------|---------|---------|---------|
| 20130708_293THistone | H3.1K27MeS28PropK36Me2 [prop_d0]     | 850.496 | 567.333 | 425.752 |
| 20130708_293THistone | H3.1K27MeS28PropK36Me2 [pic,prop_d0] | 882.002 | 588.337 | 441.505 |

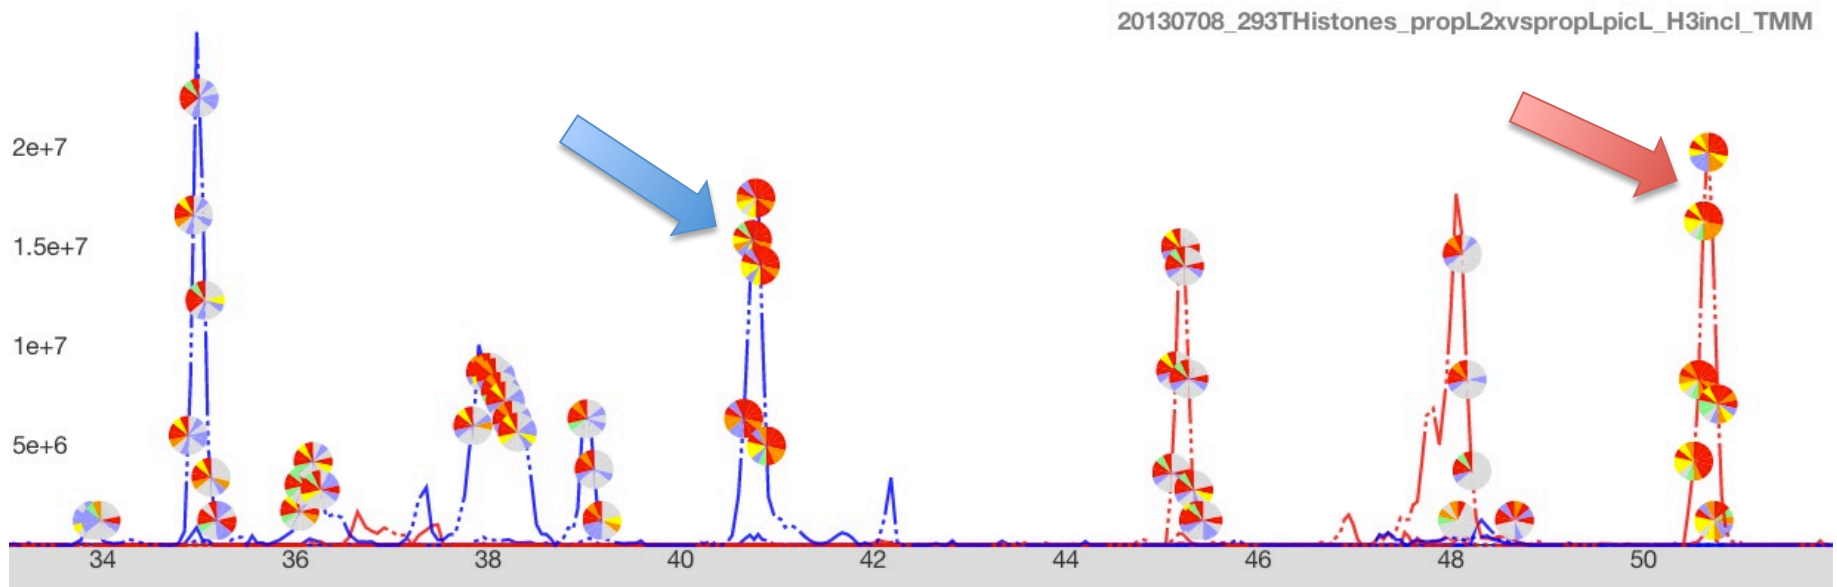

## Quanti event: 40.2-41.5min

| injection                                           | peptide                                 | charge | m/z      | auc    |
|-----------------------------------------------------|-----------------------------------------|--------|----------|--------|
| 20130708_293THistones_propL2xvspropLpicL_H3incl_TMM | H3.1K27MeS28PropK36Me2<br>[prop_d0]     | 2      | 850.4963 | 9.2e+5 |
| 20130708_293THistones_propL2xvspropLpicL_H3incl_TMM | H3.1K27MeS28PropK36Me2<br>[pic,prop_d0] | 2      | 882.0018 | 0.0e+0 |
| 20130708_293THistones_propL2xvspropLpicL_H3incl_TMM | H3.1K27MeS28PropK36Me2<br>[prop_d0]     | 3      | 567.3333 | 3.4e+7 |
| 20130708_293THistones_propL2xvspropLpicL_H3incl_TMM | H3.1K27MeS28PropK36Me2<br>[pic,prop_d0] | 3      | 588.3369 | 2.1e+4 |
| 20130708_293THistones_propL2xvspropLpicL_H3incl_TMM | H3.1K27MeS28PropK36Me2<br>[prop_d0]     | 4      | 425.7518 | 1.5e+5 |
| 20130708_293THistones_propL2xvspropLpicL_H3incl_TMM | H3.1K27MeS28PropK36Me2<br>[pic,prop_d0] | 4      | 441.5045 | 0.0e+0 |

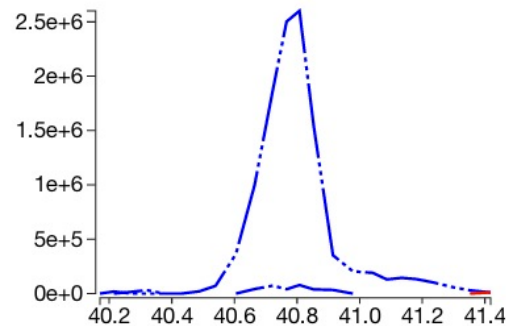

## Quanti event: 50.2-51.2min

| injection                                           | peptide                                 | charge | m/z      | auc    |
|-----------------------------------------------------|-----------------------------------------|--------|----------|--------|
| 20130708_293THistones_propL2xvspropLpicL_H3incl_TMM | H3.1K27MeS28PropK36Me2<br>[prop_d0]     | 2      | 850.4963 | 0.0e+0 |
| 20130708_293THistones_propL2xvspropLpicL_H3incl_TMM | H3.1K27MeS28PropK36Me2<br>[pic,prop_d0] | 2      | 882.0018 | 8.3e+5 |
| 20130708_293THistones_propL2xvspropLpicL_H3incl_TMM | H3.1K27MeS28PropK36Me2<br>[prop_d0]     | 3      | 567.3333 | 0.0e+0 |
| 20130708_293THistones_propL2xvspropLpicL_H3incl_TMM | H3.1K27MeS28PropK36Me2<br>[pic,prop_d0] | 3      | 588.3369 | 3.3e+7 |
| 20130708_293THistones_propL2xvspropLpicL_H3incl_TMM | H3.1K27MeS28PropK36Me2<br>[prop_d0]     | 4      | 425.7518 | 5.2e+4 |
| 20130708_293THistones_propL2xvspropLpicL_H3incl_TMM | H3.1K27MeS28PropK36Me2<br>[pic,prop_d0] | 4      | 441.5045 | 0.0e+0 |

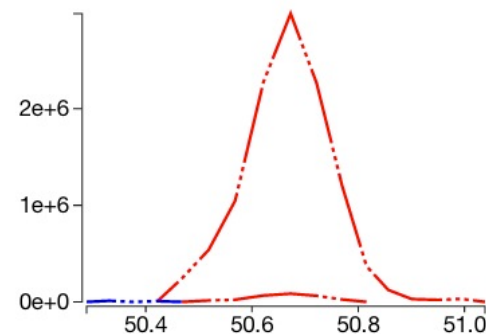

**Experimental spectrum**

scan 6863  
 retention time 40.7min  
 precursor m/z 567.3326  
 precursor charge 3+

**Theoretical**

M H<sup>3+</sup> 567.3333  
 MH Δ<sub>mass</sub> Da -0.0022  
 MH Δ<sub>mass</sub> ppm -1.3

**edit peptide**

{Propionyl}K{(Methyl,Propionyl)S}{Propionyl}APATGGVK{(Dimethyl)K}{Propionyl}PHR align

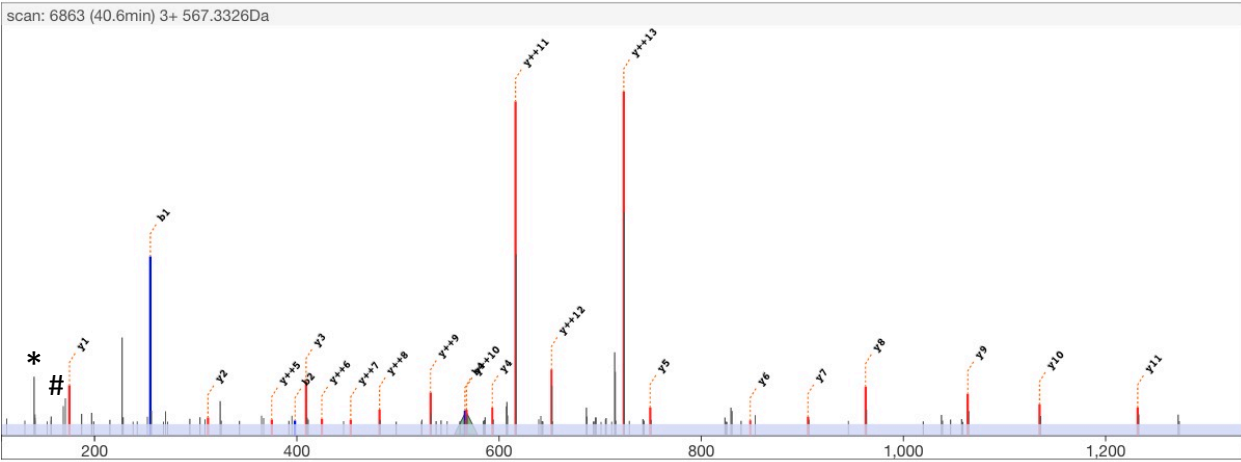

|    | b++    | b       | y                | y++     |        |    |
|----|--------|---------|------------------|---------|--------|----|
|    |        |         | Propionyl        | 1643.96 | 822.48 | 14 |
| 1  | 128.09 | 255.17  | K                |         |        | 13 |
|    |        |         | Methyl,Propionyl | 1445.82 | 723.41 | 13 |
| 2  | 199.62 | 398.23  | S                |         |        | 12 |
|    |        |         | Propionyl        | 1302.76 | 651.89 | 12 |
| 3  | 235.14 | 469.27  | A                |         |        | 11 |
|    |        |         | Propionyl        | 1231.73 | 616.37 | 11 |
| 4  | 283.66 | 566.32  | P                |         |        | 10 |
|    |        |         | Propionyl        | 1134.67 | 567.84 | 10 |
| 5  | 319.18 | 637.36  | A                |         |        | 9  |
|    |        |         | Propionyl        | 1063.64 | 532.32 | 9  |
| 6  | 369.71 | 738.40  | T                |         |        | 8  |
|    |        |         | Propionyl        | 962.59  | 481.80 | 8  |
| 7  | 398.22 | 795.42  | G                |         |        | 7  |
|    |        |         | Propionyl        | 905.57  | 453.29 | 7  |
| 8  | 426.73 | 852.45  | V                |         |        | 6  |
|    |        |         | Propionyl        | 848.55  | 424.78 | 6  |
| 9  | 476.26 | 951.51  | K                |         |        | 5  |
|    |        |         | Propionyl        | 749.48  | 375.24 | 5  |
| 10 | 554.32 | 1107.64 | K                |         |        | 4  |
|    |        |         | Dimethyl         | 593.35  | 297.18 | 4  |
| 11 | 646.38 | 1291.76 | K                |         |        | 3  |
|    |        |         | Propionyl        | 409.23  | 205.12 | 3  |
| 12 | 694.91 | 1388.81 | P                |         |        | 2  |
|    |        |         | Propionyl        | 312.18  | 156.59 | 2  |
| 13 | 763.44 | 1525.87 | H                |         |        | 1  |
|    |        |         | Propionyl        | 175.12  | 88.06  | 1  |
| 14 | 841.49 | 1681.97 | R                |         |        | 1  |

\* = 140Da diagnostic ion  
 # = 171Da diagnostic ion



**Experimental spectrum**

scan 9874  
 retention time 50.6min  
 precursor m/z 588.3357  
 precursor charge 3+

**Theoretical**

M H<sup>3+</sup> 588.3369  
 MH Δ<sub>mass</sub> Da -0.0037  
 MH Δ<sub>mass</sub> ppm -2.1

**edit peptide**

{PIC}K{Methyl,Propionyl}S{Propionyl}APATGGVK{Dimethyl}K{Propionyl}PHR align

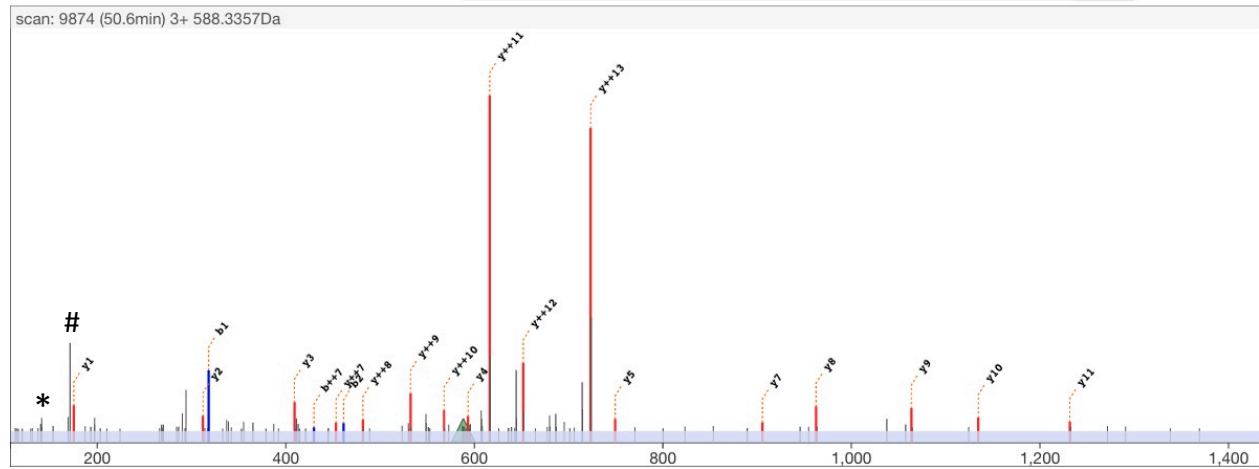

|    | b++    | b       |                    | y       | y++    |    |
|----|--------|---------|--------------------|---------|--------|----|
|    | 60.53  | 120.04  | PIC                | 1643.96 | 822.48 | 14 |
| 1  | 159.59 | 318.18  | K                  | 1445.82 | 723.41 | 13 |
| 2  | 231.12 | 461.24  | Methyl,Propionyl S | 1302.76 | 651.89 | 12 |
| 3  | 266.64 | 532.28  | Propionyl A        | 1231.73 | 616.37 | 11 |
| 4  | 315.17 | 629.33  | P                  | 1134.67 | 567.84 | 10 |
| 5  | 350.69 | 700.37  | A                  | 1063.64 | 532.32 | 9  |
| 6  | 401.21 | 801.41  | T                  | 962.59  | 481.80 | 8  |
| 7  | 429.72 | 858.44  | G                  | 905.57  | 453.29 | 7  |
| 8  | 458.23 | 915.46  | V                  | 848.55  | 424.78 | 6  |
| 9  | 507.77 | 1014.53 | K                  | 749.48  | 375.24 | 5  |
| 10 | 585.83 | 1170.65 | Dimethyl K         | 593.35  | 297.18 | 4  |
| 11 | 677.89 | 1354.77 | Propionyl K        | 409.23  | 205.12 | 3  |
| 12 | 726.42 | 1451.83 | P                  | 312.18  | 156.59 | 2  |
| 13 | 794.95 | 1588.88 | H                  | 175.12  | 88.06  | 1  |
| 14 | 873.00 | 1744.99 | R                  |         |        |    |

\* = 140Da diagnostic ion  
 # = 171Da diagnostic ion

# H3.1\_K27-R40:

KMe2SAPATGGVKMe2KPHR

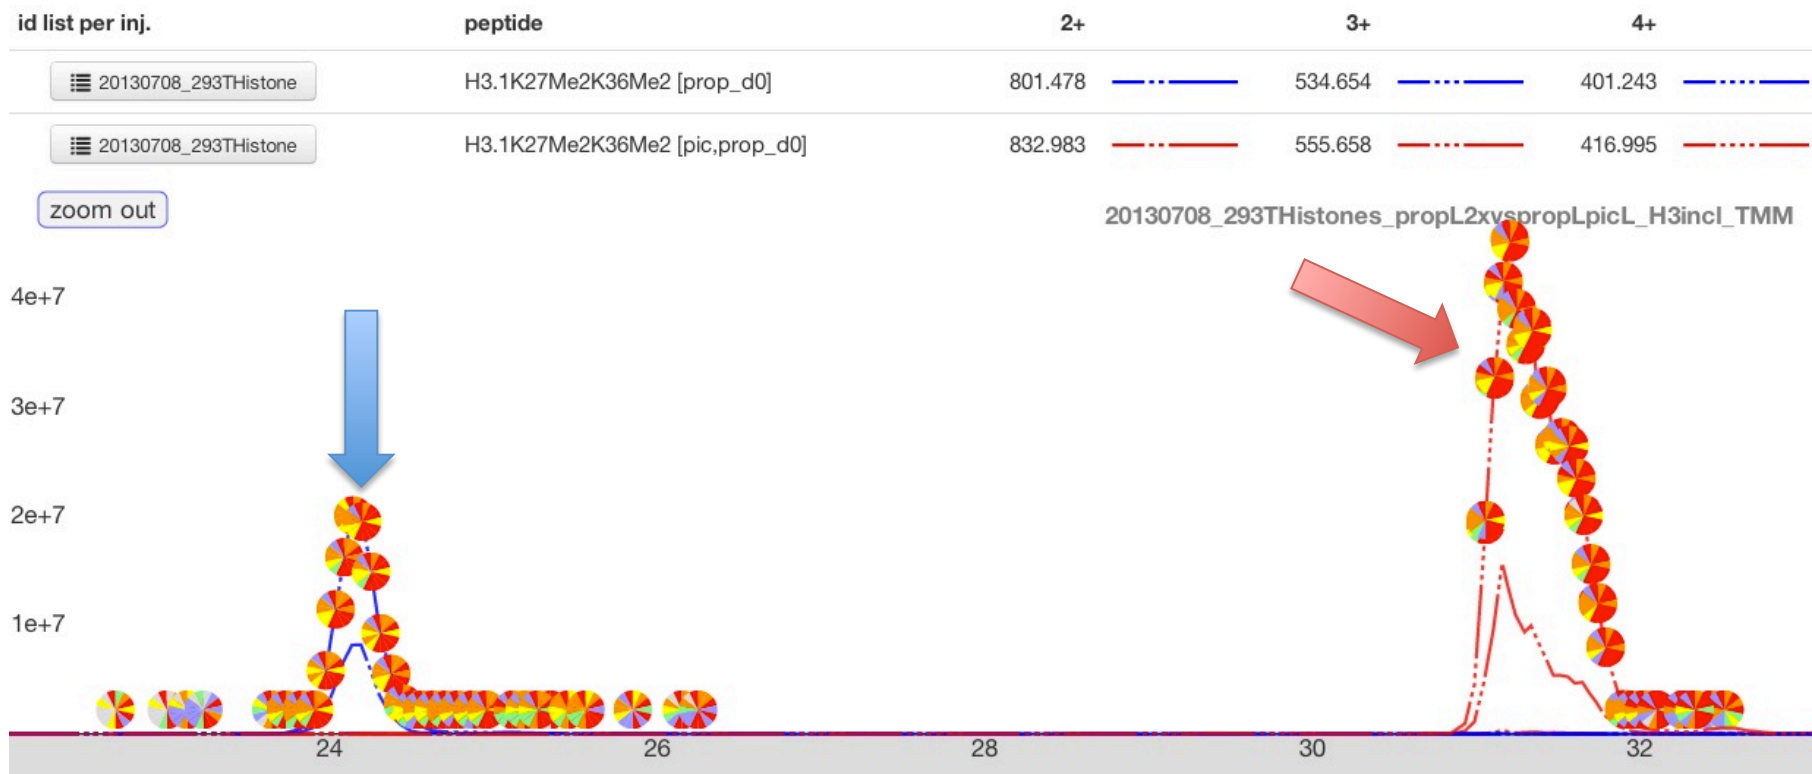

### Quanti event: 23.5-25.7min

| injection                                           | peptide                        | charge | m/z      | auc    |
|-----------------------------------------------------|--------------------------------|--------|----------|--------|
| 20130708_293THistones_propL2xvspropLpicL_H3incl_TMM | H3.1K27Me2K36Me2 [prop_d0]     | 2      | 801.4779 | 1.1e+6 |
| 20130708_293THistones_propL2xvspropLpicL_H3incl_TMM | H3.1K27Me2K36Me2 [pic,prop_d0] | 2      | 832.9834 | 0.0e+0 |
| 20130708_293THistones_propL2xvspropLpicL_H3incl_TMM | H3.1K27Me2K36Me2 [prop_d0]     | 3      | 534.6544 | 1.5e+8 |
| 20130708_293THistones_propL2xvspropLpicL_H3incl_TMM | H3.1K27Me2K36Me2 [pic,prop_d0] | 3      | 555.6580 | 0.0e+0 |
| 20130708_293THistones_propL2xvspropLpicL_H3incl_TMM | H3.1K27Me2K36Me2 [prop_d0]     | 4      | 401.2426 | 3.9e+8 |
| 20130708_293THistones_propL2xvspropLpicL_H3incl_TMM | H3.1K27Me2K36Me2 [pic,prop_d0] | 4      | 416.9953 | 1.7e+4 |

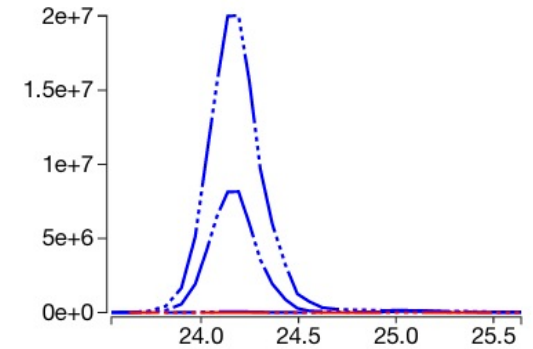

### Quanti event: 30.4-33.3min

| injection                                           | peptide                        | charge | m/z      | auc    |
|-----------------------------------------------------|--------------------------------|--------|----------|--------|
| 20130708_293THistones_propL2xvspropLpicL_H3incl_TMM | H3.1K27Me2K36Me2 [prop_d0]     | 2      | 801.4779 | 0.0e+0 |
| 20130708_293THistones_propL2xvspropLpicL_H3incl_TMM | H3.1K27Me2K36Me2 [pic,prop_d0] | 2      | 832.9834 | 5.3e+6 |
| 20130708_293THistones_propL2xvspropLpicL_H3incl_TMM | H3.1K27Me2K36Me2 [prop_d0]     | 3      | 534.6544 | 1.6e+5 |
| 20130708_293THistones_propL2xvspropLpicL_H3incl_TMM | H3.1K27Me2K36Me2 [pic,prop_d0] | 3      | 555.6580 | 3.6e+8 |
| 20130708_293THistones_propL2xvspropLpicL_H3incl_TMM | H3.1K27Me2K36Me2 [prop_d0]     | 4      | 401.2426 | 2.8e+5 |
| 20130708_293THistones_propL2xvspropLpicL_H3incl_TMM | H3.1K27Me2K36Me2 [pic,prop_d0] | 4      | 416.9953 | 1.4e+9 |

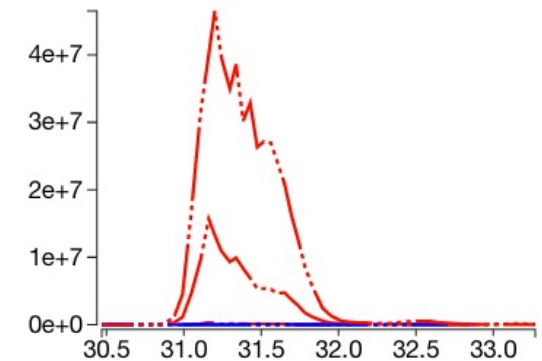

# H3.1\_K27-R40: Prop-KMe2SAPATGGVKMe2KPHR MS/MS

### Experimental spectrum

scan 3146  
 retention time 24.1min  
 precursor m/z 401.2425  
 precursor charge 4+

### Theoretical

M H<sup>4+</sup> 401.2426  
 MH Δ<sub>mass</sub> Da -0.0003  
 MH Δ<sub>mass</sub> ppm -0.2

### edit peptide

{Propionyl}K{Dimethyl}SAPATGGVK{Dimethyl}K{Propionyl}PHR align

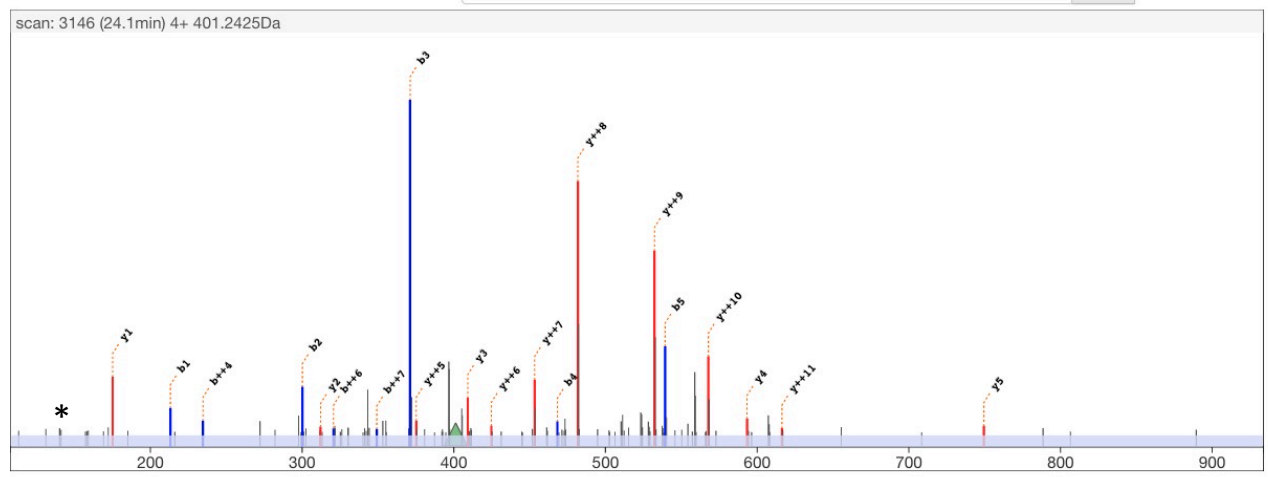

|    | b++    | b       |           | y       | y++    |    |
|----|--------|---------|-----------|---------|--------|----|
|    |        |         | Propionyl | 1545.92 | 773.46 | 14 |
| 1  | 107.08 | 213.16  | K         | 1389.80 | 695.40 | 13 |
| 2  | 150.60 | 300.19  | Dimethyl  | 1302.76 | 651.89 | 12 |
| 3  | 186.12 | 371.23  | S         | 1231.73 | 616.37 | 11 |
| 4  | 234.64 | 468.28  | A         | 1134.67 | 567.84 | 10 |
| 5  | 270.16 | 539.32  | P         | 1063.64 | 532.32 | 9  |
| 6  | 320.69 | 640.37  | A         | 962.59  | 481.80 | 8  |
| 7  | 349.20 | 697.39  | T         | 905.57  | 453.29 | 7  |
| 8  | 377.71 | 754.41  | G         | 848.55  | 424.78 | 6  |
| 9  | 427.24 | 853.48  | V         | 749.48  | 375.24 | 5  |
| 10 | 505.31 | 1009.60 | K         | 593.35  | 297.18 | 4  |
| 11 | 597.37 | 1193.73 | Dimethyl  | 409.23  | 205.12 | 3  |
| 12 | 645.89 | 1290.78 | K         | 312.18  | 156.59 | 2  |
| 13 | 714.42 | 1427.84 | Propionyl | 175.12  | 88.06  | 1  |
| 14 | 792.47 | 1583.94 | P         |         |        |    |
|    |        |         | H         |         |        |    |
|    |        |         | R         |         |        |    |

\* = 140Da diagnostic ion

# H3.1\_K27-R40: PIC-KMe2SAPATGGVKMe2KPHR MS/MS

### Experimental spectrum

scan 4420  
 retention time 31.2min  
 precursor m/z 416.9946  
 precursor charge 4+

### Theoretical

M H<sup>4+</sup> 416.9953  
 MH Δ<sub>mass</sub> Da -0.0030  
 MH Δ<sub>mass</sub> ppm -1.8

### edit peptide

{PIC}K{Dimethyl}SAPATGGVK{Dimethyl}K{Propionyl}PHR

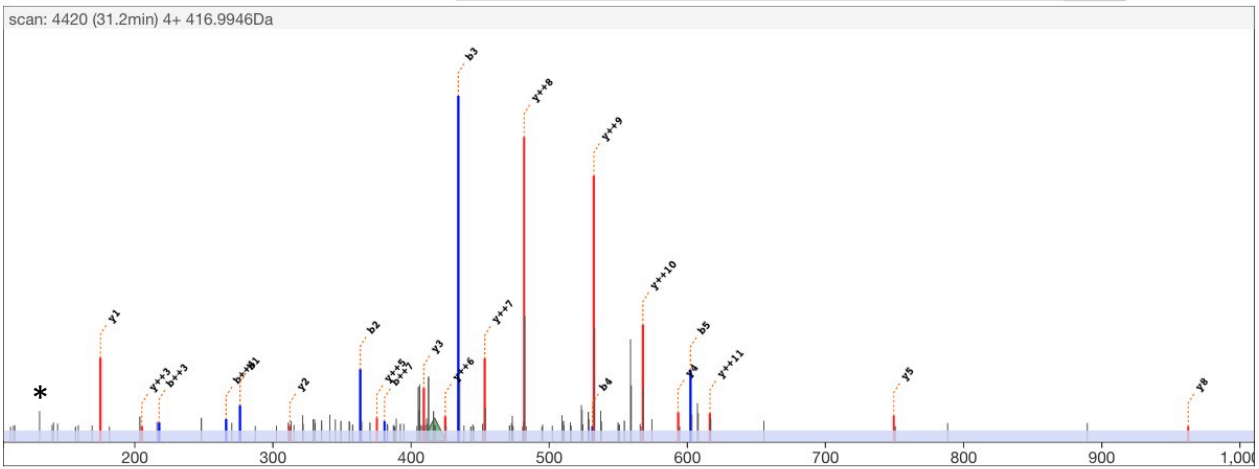

|    | b++    | b       |     | y       | y++    |    |
|----|--------|---------|-----|---------|--------|----|
|    | 60.53  | 120.04  | PIC | 1545.92 | 773.46 | 14 |
| 1  | 138.59 | 276.17  | K   | 1389.80 | 695.40 | 13 |
| 2  | 182.10 | 363.20  | S   | 1302.76 | 651.89 | 12 |
| 3  | 217.62 | 434.24  | A   | 1231.73 | 616.37 | 11 |
| 4  | 266.15 | 531.29  | P   | 1134.67 | 567.84 | 10 |
| 5  | 301.67 | 602.33  | A   | 1063.64 | 532.32 | 9  |
| 6  | 352.19 | 703.38  | T   | 962.59  | 481.80 | 8  |
| 7  | 380.70 | 760.40  | G   | 905.57  | 453.29 | 7  |
| 8  | 409.21 | 817.42  | V   | 848.55  | 424.78 | 6  |
| 9  | 458.75 | 916.49  | K   | 749.48  | 375.24 | 5  |
| 10 | 536.81 | 1072.61 | K   | 593.35  | 297.18 | 4  |
| 11 | 628.87 | 1256.74 | K   | 409.23  | 205.12 | 3  |
| 12 | 677.40 | 1353.79 | P   | 312.18  | 156.59 | 2  |
| 13 | 745.93 | 1490.85 | H   | 175.12  | 88.06  | 1  |
| 14 | 823.98 | 1646.95 | R   |         |        |    |

\* = 140Da diagnostic ion

# H3.1\_K27-R40:

KMe2SPropAPATGGVKMe2KPHR

Two peaks, PIC-labeling shifts propionylation to T32.

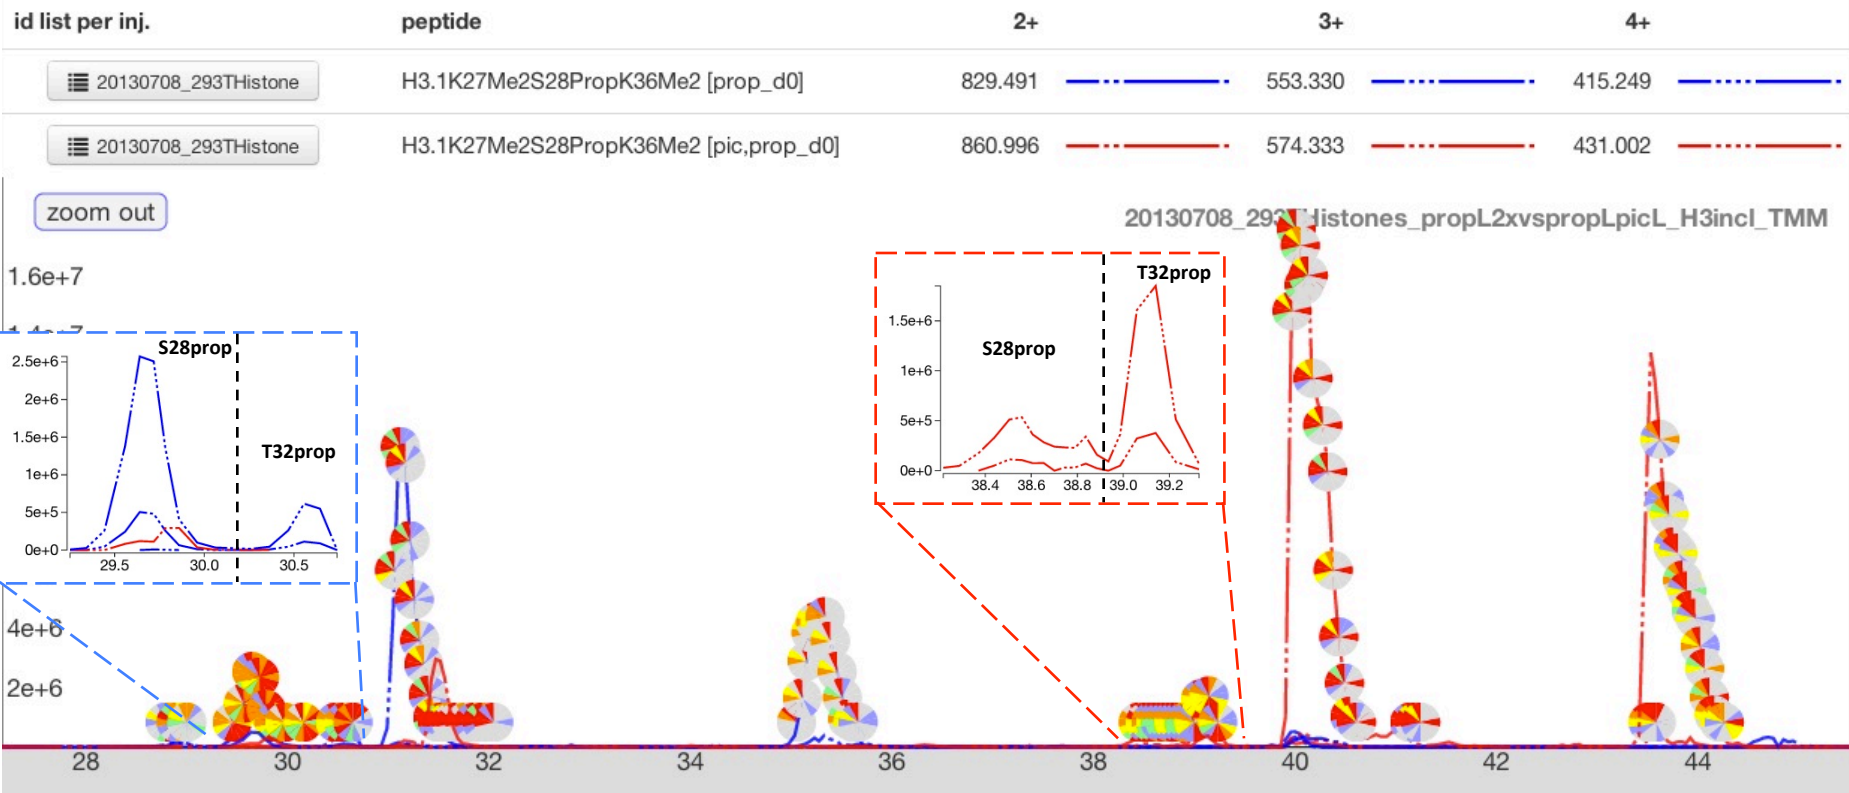

### Quanti event: 29.2-30.2min

| injection                                           | peptide                                  | charge | m/z      | auc    |
|-----------------------------------------------------|------------------------------------------|--------|----------|--------|
| 20130708_293THistones_propL2xvspropLpicL_H3incl_TMM | H3.1K27Me2S28PropK36Me2<br>[prop_d0]     | 2      | 829.4910 | 5.0e+4 |
| 20130708_293THistones_propL2xvspropLpicL_H3incl_TMM | H3.1K27Me2S28PropK36Me2<br>[pic,prop_d0] | 2      | 860.9965 | 0.0e+0 |
| 20130708_293THistones_propL2xvspropLpicL_H3incl_TMM | H3.1K27Me2S28PropK36Me2<br>[prop_d0]     | 3      | 553.3298 | 7.7e+6 |
| 20130708_293THistones_propL2xvspropLpicL_H3incl_TMM | H3.1K27Me2S28PropK36Me2<br>[pic,prop_d0] | 3      | 574.3334 | 4.6e+6 |
| 20130708_293THistones_propL2xvspropLpicL_H3incl_TMM | H3.1K27Me2S28PropK36Me2<br>[prop_d0]     | 4      | 415.2492 | 4.2e+7 |
| 20130708_293THistones_propL2xvspropLpicL_H3incl_TMM | H3.1K27Me2S28PropK36Me2<br>[pic,prop_d0] | 4      | 431.0019 | 0.0e+0 |

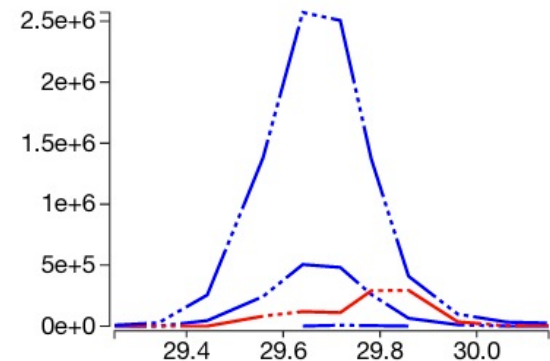

### Quanti event: 38.0-38.9min

| injection                                           | peptide                                  | charge | m/z      | auc    |
|-----------------------------------------------------|------------------------------------------|--------|----------|--------|
| 20130708_293THistones_propL2xvspropLpicL_H3incl_TMM | H3.1K27Me2S28PropK36Me2<br>[prop_d0]     | 2      | 829.4910 | 0.0e+0 |
| 20130708_293THistones_propL2xvspropLpicL_H3incl_TMM | H3.1K27Me2S28PropK36Me2<br>[pic,prop_d0] | 2      | 860.9965 | 0.0e+0 |
| 20130708_293THistones_propL2xvspropLpicL_H3incl_TMM | H3.1K27Me2S28PropK36Me2<br>[prop_d0]     | 3      | 553.3298 | 0.0e+0 |
| 20130708_293THistones_propL2xvspropLpicL_H3incl_TMM | H3.1K27Me2S28PropK36Me2<br>[pic,prop_d0] | 3      | 574.3334 | 1.8e+6 |
| 20130708_293THistones_propL2xvspropLpicL_H3incl_TMM | H3.1K27Me2S28PropK36Me2<br>[prop_d0]     | 4      | 415.2492 | 0.0e+0 |
| 20130708_293THistones_propL2xvspropLpicL_H3incl_TMM | H3.1K27Me2S28PropK36Me2<br>[pic,prop_d0] | 4      | 431.0019 | 1.1e+7 |

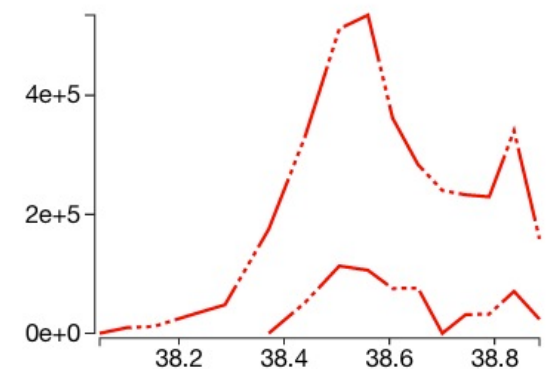

# H3.1\_K27-R40: Prop-KMe2SPropAPATGGVKMe2KPHR MS/MS

**Experimental spectrum**

scan 4131  
 retention time 29.7min  
 precursor m/z 415.2494  
 precursor charge 4+

**Theoretical**

M H<sup>4+</sup> 415.2492  
 MH Δ<sub>mass</sub> Da 0.0009  
 MH Δ<sub>mass</sub> ppm 0.6

**edit peptide**

{Propionyl}K{Dimethyl}S{Propionyl}APATGGVK{Dimethyl}K{Propionyl}PHR align

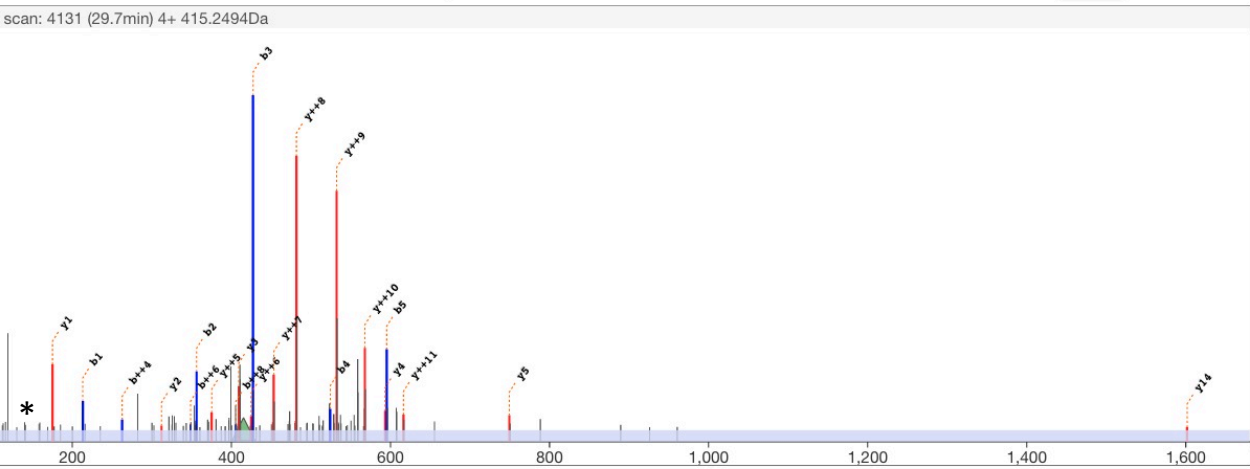

|    | b++    | b       |           | y       | y++    |    |
|----|--------|---------|-----------|---------|--------|----|
|    |        |         | Propionyl | 1601.95 | 801.48 | 14 |
| 1  | 107.08 | 213.16  | K         |         |        |    |
|    |        |         | Dimethyl  | 1445.82 | 723.41 | 13 |
| 2  | 178.61 | 356.22  | S         |         |        |    |
|    |        |         | Propionyl | 1302.76 | 651.89 | 12 |
| 3  | 214.13 | 427.26  | A         |         |        |    |
| 4  | 262.66 | 524.31  | P         |         | 616.37 | 11 |
| 5  | 298.18 | 595.34  | A         |         | 567.84 | 10 |
| 6  | 348.70 | 696.39  | T         |         | 532.32 | 9  |
| 7  | 377.21 | 753.41  | G         |         | 481.80 | 8  |
| 8  | 405.72 | 810.44  | V         |         | 453.29 | 7  |
| 9  | 455.26 | 909.50  | K         |         | 424.78 | 6  |
|    |        |         | Propionyl | 749.48  | 375.24 | 5  |
| 10 | 533.32 | 1065.63 | K         |         |        |    |
|    |        |         | Dimethyl  | 593.35  | 297.18 | 4  |
| 11 | 625.38 | 1249.75 | K         |         |        |    |
|    |        |         | Propionyl | 409.23  | 205.12 | 3  |
| 12 | 673.91 | 1346.80 | P         |         |        |    |
| 13 | 742.44 | 1483.86 | H         |         | 175.12 | 2  |
| 14 | 820.49 | 1639.96 | R         |         | 88.06  | 1  |

\* = 140Da diagnostic ion



# H3.1\_K27-R40: PIC-KMe2SPropAPATGGVKMe2KPHR MS/MS

**Experimental spectrum**

scan 6244  
 retention time 38.6min  
 precursor m/z 431.0020  
 precursor charge 4+

**Theoretical**

M H<sup>+</sup> 431.0019  
 MH Δ<sub>mass</sub> Da 0.0004  
 MH Δ<sub>mass</sub> ppm 0.2

**edit peptide**

{PIC}K{Dimethyl}S{Propionyl}APATGGVK{Dimethyl}K{Propionyl}PHR

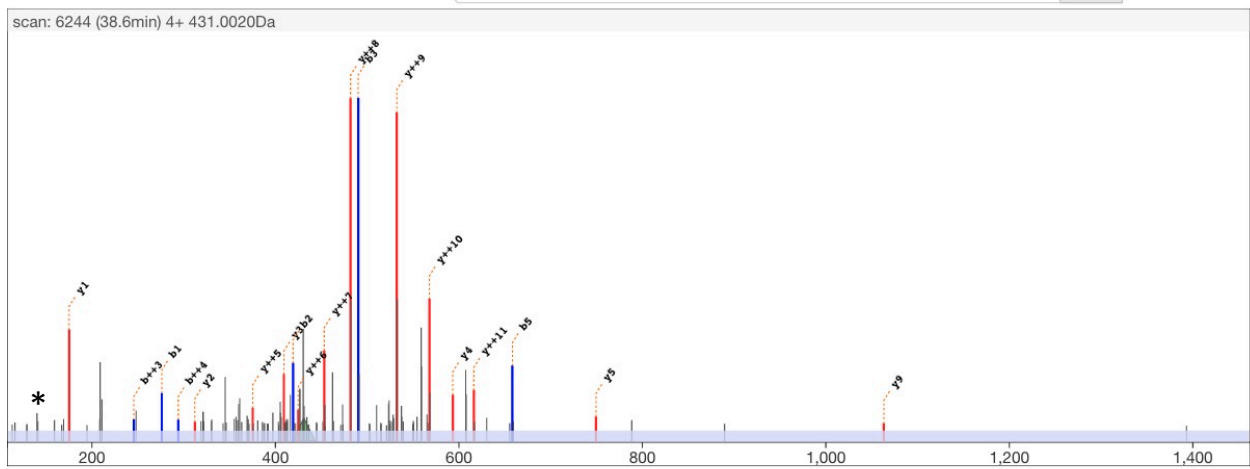

|    | b++    | b       |     | y       | y++    |    |
|----|--------|---------|-----|---------|--------|----|
|    | 60.53  | 120.04  | PIC | 1601.95 | 801.48 | 14 |
| 1  | 138.59 | 276.17  | K   | 1445.82 | 723.41 | 13 |
| 2  | 210.12 | 419.23  | S   | 1302.76 | 651.89 | 12 |
| 3  | 245.64 | 490.27  | A   | 1231.73 | 616.37 | 11 |
| 4  | 294.16 | 587.32  | P   | 1134.67 | 567.84 | 10 |
| 5  | 329.68 | 658.36  | A   | 1063.64 | 532.32 | 9  |
| 6  | 380.21 | 759.40  | T   | 962.59  | 481.80 | 8  |
| 7  | 408.72 | 816.43  | G   | 905.57  | 453.29 | 7  |
| 8  | 437.23 | 873.45  | V   | 848.55  | 424.78 | 6  |
| 9  | 486.76 | 972.51  | K   | 749.48  | 375.24 | 5  |
| 10 | 564.82 | 1128.64 | S   | 593.35  | 297.18 | 4  |
| 11 | 656.88 | 1312.76 | K   | 409.23  | 205.12 | 3  |
| 12 | 705.41 | 1409.82 | P   | 312.18  | 156.59 | 2  |
| 13 | 773.94 | 1546.87 | H   | 175.12  | 88.06  | 1  |
| 14 | 851.99 | 1702.98 | R   |         |        |    |

\* = 140Da diagnostic ion

# H3.1\_K27-R40:

KMe2SAPATPropGGVKMe2KPHR

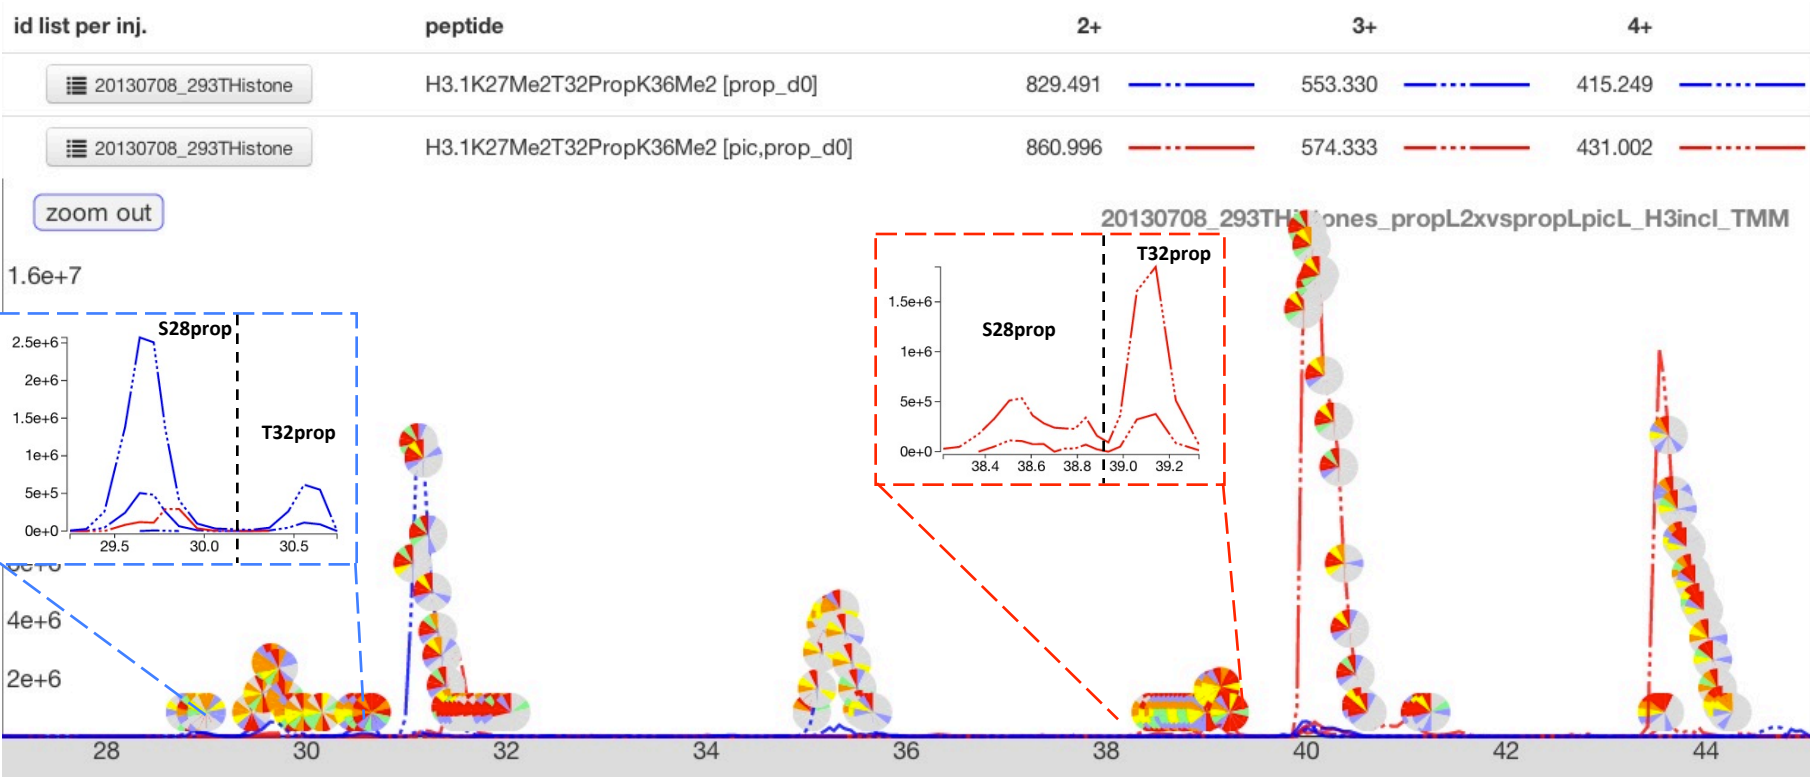

### Quanti event: 30.2-30.8min

| injection                                           | peptide                                  | charge | m/z      | auc    |
|-----------------------------------------------------|------------------------------------------|--------|----------|--------|
| 20130708_293THistones_propL2xvspropLpicL_H3incl_TMM | H3.1K27Me2T32PropK36Me2<br>[prop_d0]     | 2      | 829.4910 | 0.0e+0 |
| 20130708_293THistones_propL2xvspropLpicL_H3incl_TMM | H3.1K27Me2T32PropK36Me2<br>[pic,prop_d0] | 2      | 860.9965 | 0.0e+0 |
| 20130708_293THistones_propL2xvspropLpicL_H3incl_TMM | H3.1K27Me2T32PropK36Me2<br>[prop_d0]     | 3      | 553.3298 | 1.4e+6 |
| 20130708_293THistones_propL2xvspropLpicL_H3incl_TMM | H3.1K27Me2T32PropK36Me2<br>[pic,prop_d0] | 3      | 574.3334 | 7.8e+3 |
| 20130708_293THistones_propL2xvspropLpicL_H3incl_TMM | H3.1K27Me2T32PropK36Me2<br>[prop_d0]     | 4      | 415.2492 | 8.1e+6 |
| 20130708_293THistones_propL2xvspropLpicL_H3incl_TMM | H3.1K27Me2T32PropK36Me2<br>[pic,prop_d0] | 4      | 431.0019 | 0.0e+0 |

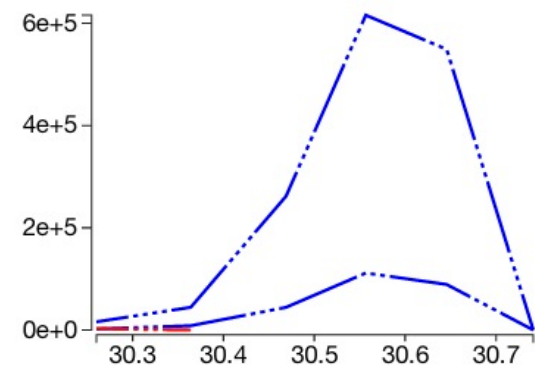

### Quanti event: 38.9-39.6min

| injection                                           | peptide                                  | charge | m/z      | auc    |
|-----------------------------------------------------|------------------------------------------|--------|----------|--------|
| 20130708_293THistones_propL2xvspropLpicL_H3incl_TMM | H3.1K27Me2T32PropK36Me2<br>[prop_d0]     | 2      | 829.4910 | 0.0e+0 |
| 20130708_293THistones_propL2xvspropLpicL_H3incl_TMM | H3.1K27Me2T32PropK36Me2<br>[pic,prop_d0] | 2      | 860.9965 | 0.0e+0 |
| 20130708_293THistones_propL2xvspropLpicL_H3incl_TMM | H3.1K27Me2T32PropK36Me2<br>[prop_d0]     | 3      | 553.3298 | 0.0e+0 |
| 20130708_293THistones_propL2xvspropLpicL_H3incl_TMM | H3.1K27Me2T32PropK36Me2<br>[pic,prop_d0] | 3      | 574.3334 | 4.2e+6 |
| 20130708_293THistones_propL2xvspropLpicL_H3incl_TMM | H3.1K27Me2T32PropK36Me2<br>[prop_d0]     | 4      | 415.2492 | 0.0e+0 |
| 20130708_293THistones_propL2xvspropLpicL_H3incl_TMM | H3.1K27Me2T32PropK36Me2<br>[pic,prop_d0] | 4      | 431.0019 | 2.2e+7 |

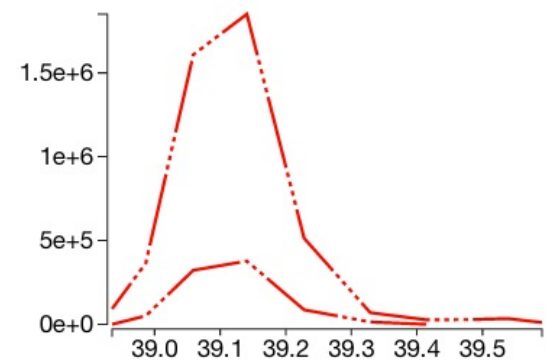

# H3.1\_K27-R40: Prop-KMe2SAPATPropGGVKMe2KPHR MS/MS

### Experimental spectrum

scan 4259  
 retention time 30.5min  
 precursor m/z 415.2485  
 precursor charge 4+

### Theoretical

M H<sup>4+</sup> 415.2492  
 MH Δ<sub>mass</sub> Da -0.0025  
 MH Δ<sub>mass</sub> ppm -1.5

### edit peptide

{Propionyl}K{Dimethyl}SAPAT{Propionyl}GGVK{Dimethyl}K{Propionyl}PHR

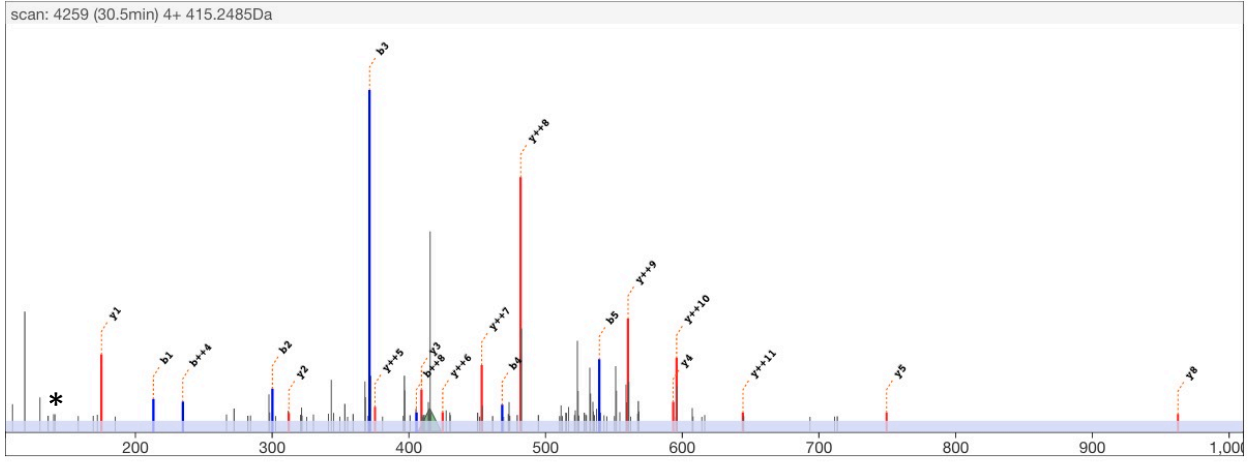

|    | b++    | b       |           | y       | y++    |    |
|----|--------|---------|-----------|---------|--------|----|
|    |        |         | Propionyl | 1601.95 | 801.48 | 14 |
| 1  | 107.08 | 213.16  | K         |         |        |    |
|    |        |         | Dimethyl  | 1445.82 | 723.41 | 13 |
| 2  | 150.60 | 300.19  | S         |         |        |    |
|    |        |         | A         | 1358.79 | 679.90 | 12 |
| 3  | 186.12 | 371.23  | P         |         | 644.38 | 11 |
| 4  | 234.64 | 468.28  | A         | 1190.70 | 595.85 | 10 |
| 5  | 270.16 | 539.32  | T         | 1119.66 | 560.34 | 9  |
| 6  | 348.70 | 696.39  | Propionyl | 962.59  | 481.80 | 8  |
| 7  | 377.21 | 753.41  | G         | 905.57  | 453.29 | 7  |
| 8  | 405.72 | 810.44  | V         | 848.55  | 424.78 | 6  |
| 9  | 455.26 | 909.50  | K         | 749.48  | 375.24 | 5  |
| 10 | 533.32 | 1065.63 | Dimethyl  | 593.35  | 297.18 | 4  |
| 11 | 625.38 | 1249.75 | K         | 409.23  | 205.12 | 3  |
| 12 | 673.91 | 1346.80 | P         | 312.18  | 156.59 | 2  |
| 13 | 742.44 | 1483.86 | H         | 175.12  | 88.06  | 1  |
| 14 | 820.49 | 1639.96 | R         |         |        |    |

\* = 140Da diagnostic ion

# H3.1\_K27-R40: PIC-KMe2SAPATPropGGVKMe2KPHR MS/MS

**Experimental spectrum**

scan 6402  
 retention time 39.1min  
 precursor m/z 431.0020  
 precursor charge 4+

**Theoretical**

M H<sup>4+</sup> 431.0019  
 MH Δ<sub>mass</sub> Da 0.0003  
 MH Δ<sub>mass</sub> ppm 0.2

**edit peptide**

{PIC}K{Dimethyl}SAPAT{Propionyl}GGVK{Dimethyl}K{Propionyl}PHR align

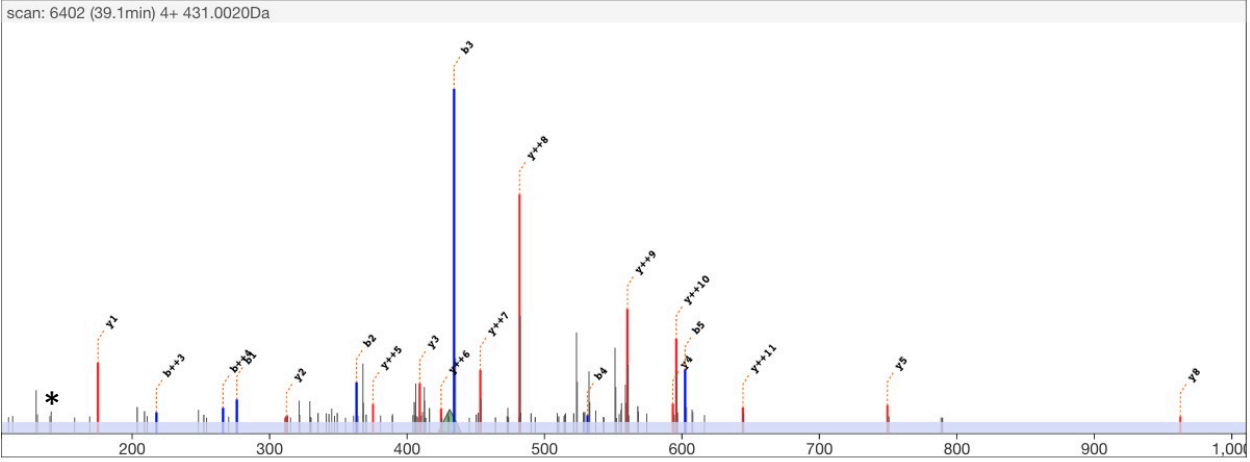

|    | b++    | b       |           | y       | y++    |
|----|--------|---------|-----------|---------|--------|
|    | 60.53  | 120.04  | PIC       | 1601.95 | 801.48 |
| 1  | 138.59 | 276.17  | K         | 1445.82 | 723.41 |
| 2  | 182.10 | 363.20  | Dimethyl  | 1358.79 | 679.90 |
| 3  | 217.62 | 434.24  | S         | 1287.75 | 644.38 |
| 4  | 266.15 | 531.29  | A         | 1190.70 | 595.85 |
| 5  | 301.67 | 602.33  | P         | 1119.66 | 560.34 |
| 6  | 380.21 | 759.40  | T         | 962.59  | 481.80 |
| 7  | 408.72 | 816.43  | Propionyl | 905.57  | 453.29 |
| 8  | 437.23 | 873.45  | G         | 848.55  | 424.78 |
| 9  | 486.76 | 972.51  | V         | 749.48  | 375.24 |
| 10 | 564.82 | 1128.64 | K         | 593.35  | 297.18 |
| 11 | 656.88 | 1312.76 | Dimethyl  | 409.23  | 205.12 |
| 12 | 705.41 | 1409.82 | K         | 312.18  | 156.59 |
| 13 | 773.94 | 1546.87 | Propionyl | 175.12  | 88.06  |
| 14 | 851.99 | 1702.98 | K         |         |        |
|    |        |         | P         |         |        |
|    |        |         | H         |         |        |
|    |        |         | R         |         |        |

\* = 140Da diagnostic ion

# H3.1\_K27-R40:

## KMe3SAPATGGVKMe2KPHR

Overlaps with K27Me2,K36me3 (see page 319). Calculation of AUC on MS2 level.

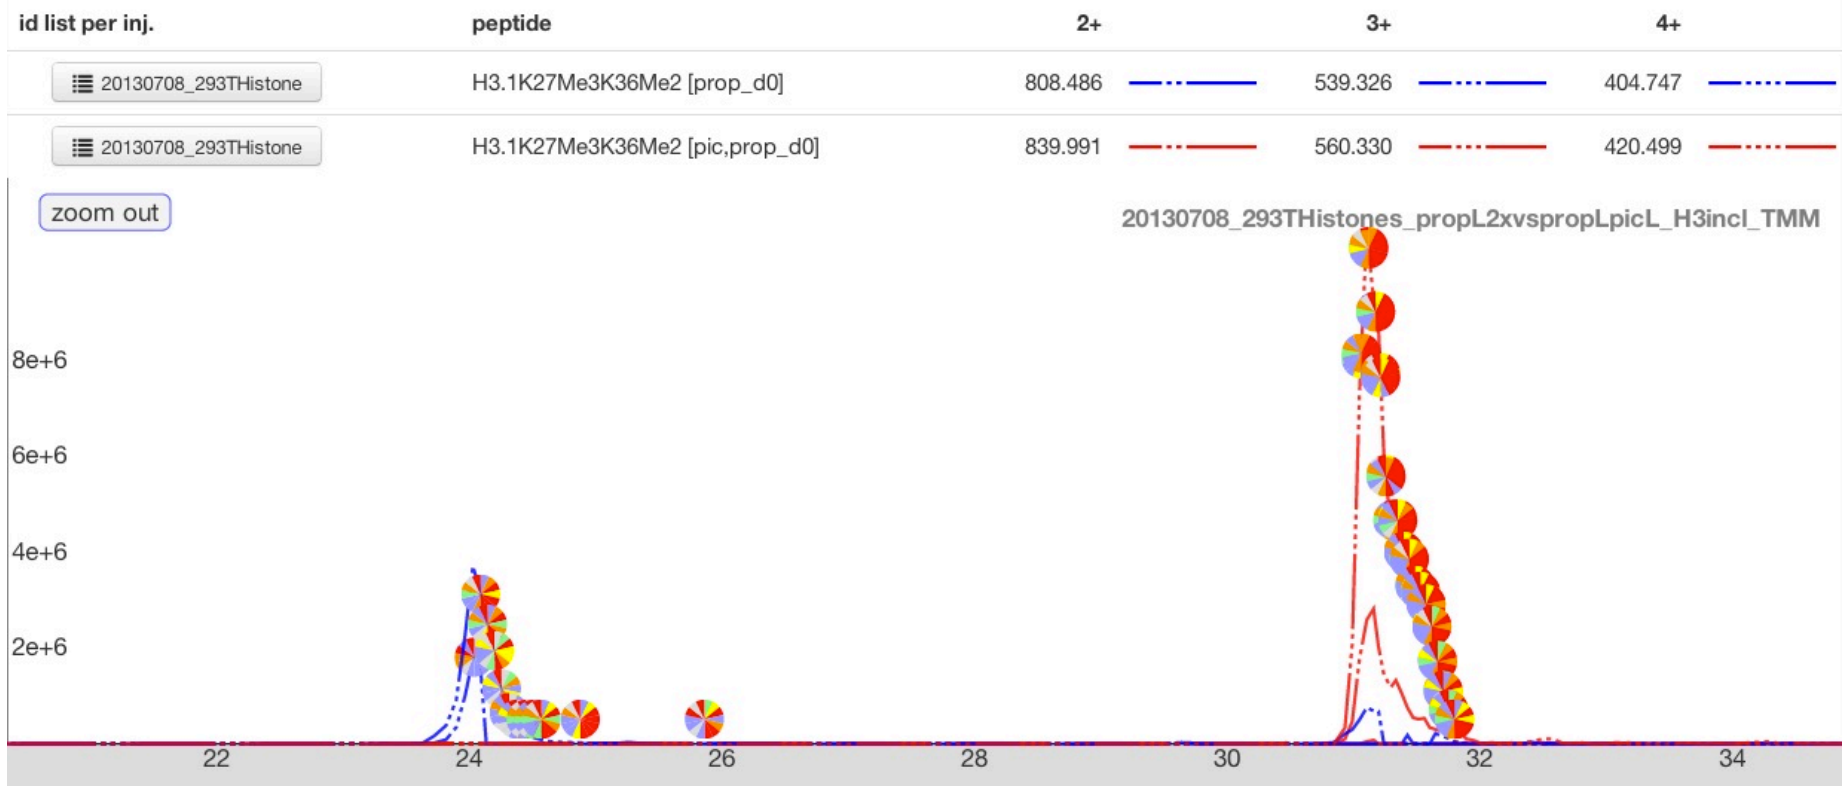

20130708 293THistones\_propL2xvspropLp... 7/8/2013 11:43:33 AM

6 of 10 ul. Histones  
RT: 15.31 - 38.94

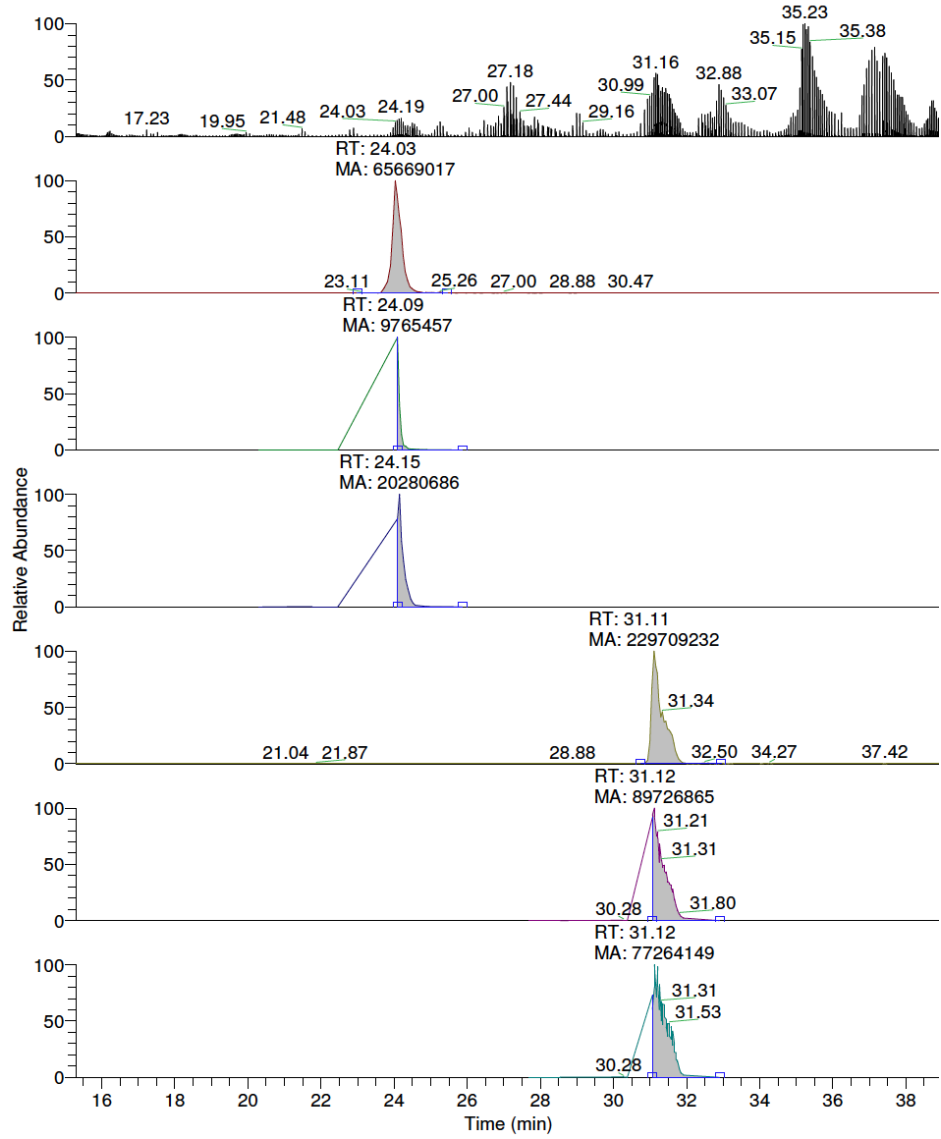

AUC calculation on MS2 level:

XIC-Prop 404.74 (4+)  
 227.18, 385.24, 481.80, 482.30,  
 532.32, 567.84, 749.48

XIC-PIC 420.499 (4+)  
 290.19, 377.22, 448.26, 481.80,  
 532.32, 567.84, 616.37

### Quanti event: 20.3-28.9min

| injection                                           | peptide                           | charge | m/z      | auc    |
|-----------------------------------------------------|-----------------------------------|--------|----------|--------|
| 20130708_293THistones_propL2xvspropLpicL_H3incl_TMM | H3.1K27Me3K36Me2<br>[prop_d0]     | 2      | 808.4858 | 1.4e+5 |
| 20130708_293THistones_propL2xvspropLpicL_H3incl_TMM | H3.1K27Me3K36Me2<br>[pic,prop_d0] | 2      | 839.9912 | 0.0e+0 |
| 20130708_293THistones_propL2xvspropLpicL_H3incl_TMM | H3.1K27Me3K36Me2<br>[prop_d0]     | 3      | 539.3263 | 1.8e+7 |
| 20130708_293THistones_propL2xvspropLpicL_H3incl_TMM | H3.1K27Me3K36Me2<br>[pic,prop_d0] | 3      | 560.3299 | 1.8e+5 |
| 20130708_293THistones_propL2xvspropLpicL_H3incl_TMM | H3.1K27Me3K36Me2<br>[prop_d0]     | 4      | 404.7465 | 6.7e+7 |
| 20130708_293THistones_propL2xvspropLpicL_H3incl_TMM | H3.1K27Me3K36Me2<br>[pic,prop_d0] | 4      | 420.4992 | 1.2e+4 |

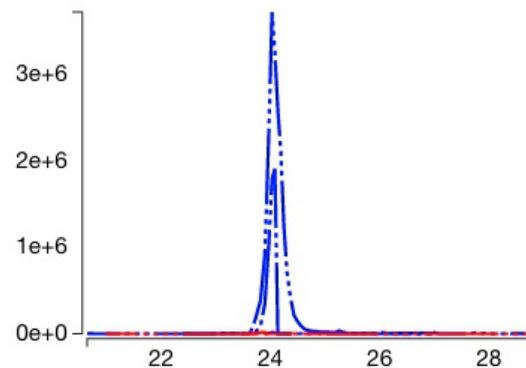

### Quanti event: 30.6-32.2min

| injection                                           | peptide                           | charge | m/z      | auc    |
|-----------------------------------------------------|-----------------------------------|--------|----------|--------|
| 20130708_293THistones_propL2xvspropLpicL_H3incl_TMM | H3.1K27Me3K36Me2<br>[prop_d0]     | 2      | 808.4858 | 0.0e+0 |
| 20130708_293THistones_propL2xvspropLpicL_H3incl_TMM | H3.1K27Me3K36Me2<br>[pic,prop_d0] | 2      | 839.9912 | 3.7e+5 |
| 20130708_293THistones_propL2xvspropLpicL_H3incl_TMM | H3.1K27Me3K36Me2<br>[prop_d0]     | 3      | 539.3263 | 1.2e+7 |
| 20130708_293THistones_propL2xvspropLpicL_H3incl_TMM | H3.1K27Me3K36Me2<br>[pic,prop_d0] | 3      | 560.3299 | 5.3e+7 |
| 20130708_293THistones_propL2xvspropLpicL_H3incl_TMM | H3.1K27Me3K36Me2<br>[prop_d0]     | 4      | 404.7465 | 0.0e+0 |
| 20130708_293THistones_propL2xvspropLpicL_H3incl_TMM | H3.1K27Me3K36Me2<br>[pic,prop_d0] | 4      | 420.4992 | 2.3e+8 |

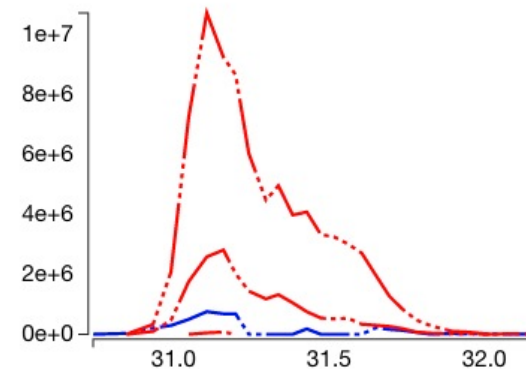



# H3.1\_K27-R40: Prop-KMe3SAPATGGVKMe2KPHR MS/MS

**Experimental spectrum**

scan 3326  
 retention time 24.9min  
 precursor m/z 404.7469  
 precursor charge 4+

**Theoretical**

M H<sup>4+</sup> 404.7465  
 MH Δ<sub>mass</sub> Da 0.0017  
 MH Δ<sub>mass</sub> ppm 1.1

**edit peptide**

{Propionyl}K{Trimethyl}SAPATGGVK{Dimethyl}K{Propionyl}PHR align

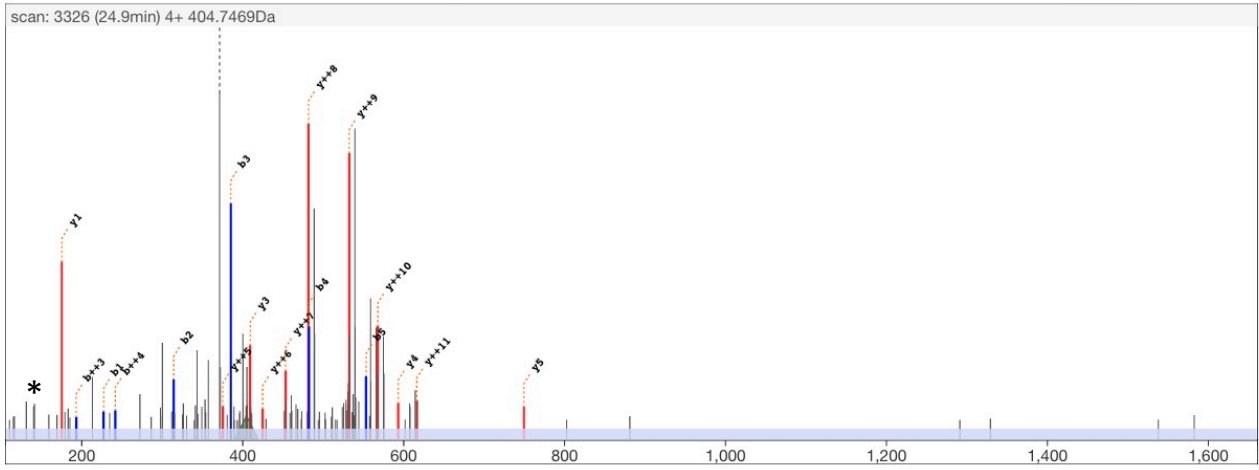

|    | b++    | b       |                                                                                                                | y       | y++    |
|----|--------|---------|----------------------------------------------------------------------------------------------------------------|---------|--------|
| 1  | 114.09 | 227.18  | Propionyl<br>K<br>Trimethyl<br>S<br>A<br>P<br>A<br>T<br>G<br>G<br>V<br>K<br>K<br>K<br>Propionyl<br>P<br>H<br>R | 1559.94 | 780.47 |
| 2  | 157.61 | 314.21  |                                                                                                                | 1389.80 | 695.40 |
| 3  | 193.13 | 385.24  |                                                                                                                | 1302.76 | 651.89 |
| 4  | 241.65 | 482.30  |                                                                                                                | 1231.73 | 616.37 |
| 5  | 277.17 | 553.33  |                                                                                                                | 1134.67 | 567.84 |
| 6  | 327.69 | 654.38  |                                                                                                                | 1063.64 | 532.32 |
| 7  | 356.21 | 711.40  |                                                                                                                | 962.59  | 481.80 |
| 8  | 384.72 | 768.43  |                                                                                                                | 905.57  | 453.29 |
| 9  | 434.25 | 867.49  |                                                                                                                | 848.55  | 424.78 |
| 10 | 512.31 | 1023.62 |                                                                                                                | 749.48  | 375.24 |
| 11 | 604.37 | 1207.74 |                                                                                                                | 593.35  | 297.18 |
| 12 | 652.90 | 1304.79 |                                                                                                                | 409.23  | 205.12 |
| 13 | 721.43 | 1441.85 |                                                                                                                | 312.18  | 156.59 |
| 14 | 799.48 | 1597.95 |                                                                                                                | 175.12  | 88.06  |

\* = 140Da diagnostic ion

**Experimental spectrum**

scan 4374  
 retention time 31.1min  
 precursor m/z 420.4988  
 precursor charge 4+

**Theoretical**

M H<sup>4+</sup> 420.4992  
 MH Δ<sub>mass</sub> Da -0.0018  
 MH Δ<sub>mass</sub> ppm -1.1

**edit peptide**

(PIC)K(Trimethyl)SAPATGGVK(Dimethyl)K(Propionyl)PHR

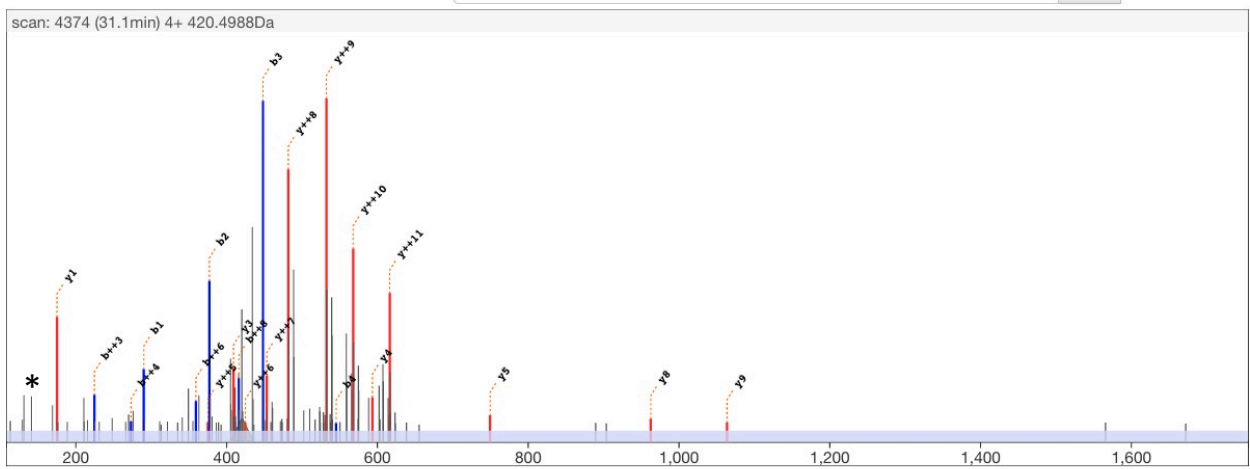

|    | b++    | b       |           | y       | y++    |    |
|----|--------|---------|-----------|---------|--------|----|
|    | 60.53  | 120.04  | PIC       | 1559.94 | 780.47 | 14 |
| 1  | 145.60 | 290.19  | K         | 1389.80 | 695.40 | 13 |
| 2  | 189.11 | 377.22  | S         | 1302.76 | 651.89 | 12 |
| 3  | 224.63 | 448.26  | A         | 1231.73 | 616.37 | 11 |
| 4  | 273.16 | 545.31  | P         | 1134.67 | 567.84 | 10 |
| 5  | 308.68 | 616.35  | A         | 1063.64 | 532.32 | 9  |
| 6  | 359.20 | 717.39  | T         | 962.59  | 481.80 | 8  |
| 7  | 387.71 | 774.41  | G         | 905.57  | 453.29 | 7  |
| 8  | 416.22 | 831.44  | V         | 848.55  | 424.78 | 6  |
| 9  | 465.76 | 930.50  | K         | 749.48  | 375.24 | 5  |
| 10 | 543.82 | 1086.63 | Dimethyl  | 593.35  | 297.18 | 4  |
| 11 | 635.88 | 1270.75 | K         | 409.23  | 205.12 | 3  |
| 12 | 684.41 | 1367.80 | Propionyl | 312.18  | 156.59 | 2  |
| 13 | 752.94 | 1504.86 | P         | 175.12  | 88.06  | 1  |
| 14 | 830.99 | 1660.96 | H         |         |        |    |
|    |        |         | R         |         |        |    |

\* = 140Da diagnostic ion
