# Supplementary material
Source: PubMed Central journal article supplement (PMC4390259)
Supplement: supp_O114.046573_mcp.O114.046573-8.pdf [file supp_O114.046573_mcp.O114.046573-8.pdf]

# H3.1\_K27-R40:

KMe3SPropAPATGGVKMe2KPHR

Overlaps with K27Me2,K36Me3, S28Prop (see page 324).

| id list per inj.     | peptide                               | 2+      | 3+      | 4+      |
|----------------------|---------------------------------------|---------|---------|---------|
| 20130708_293THistone | H3.1K27Me3S28PropK36Me2 [prop_d0]     | 836.499 | 558.002 | 418.753 |
| 20130708_293THistone | H3.1K27Me3S28PropK36Me2 [pic,prop_d0] | 868.004 | 579.005 | 434.506 |

20130708\_293THistones\_propL2xvspropLpicL\_H3incl\_TMM

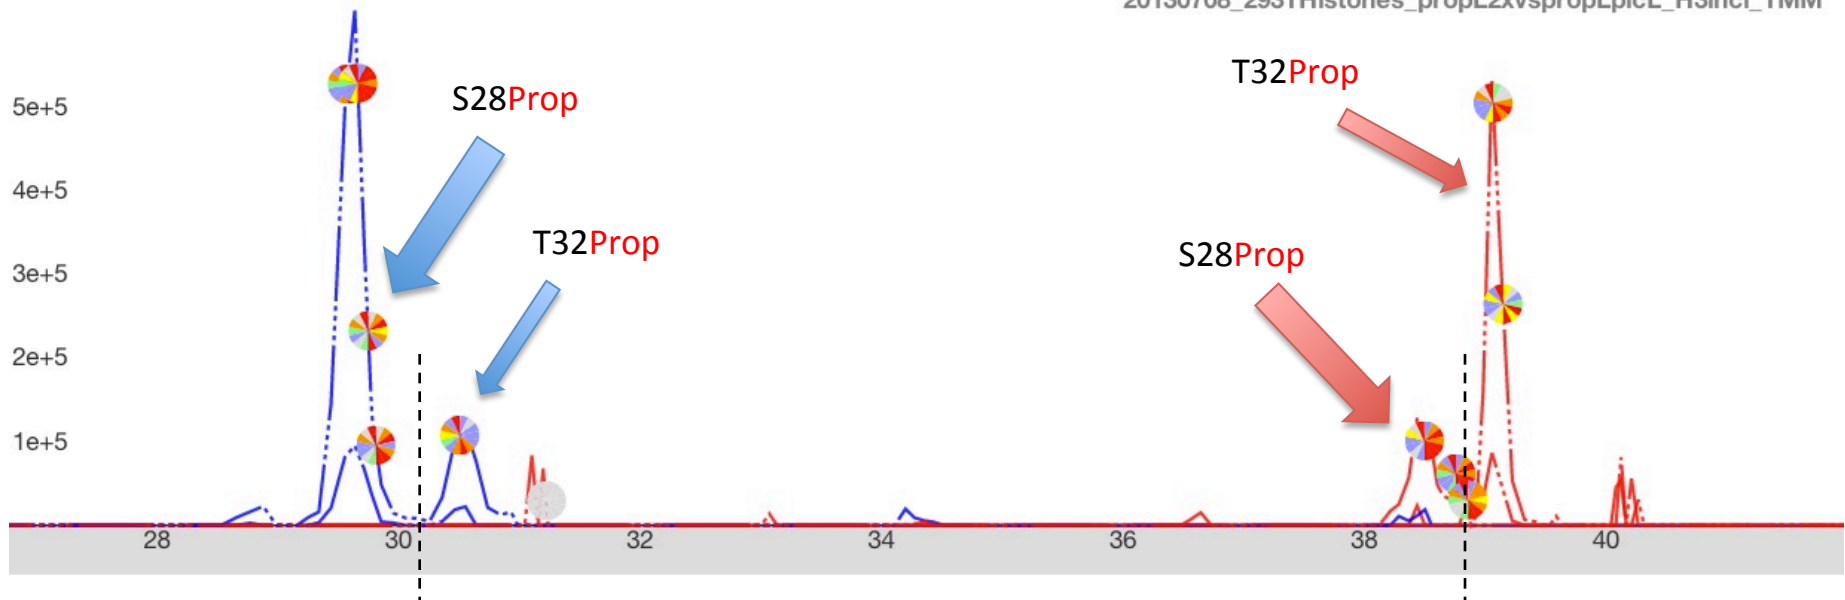

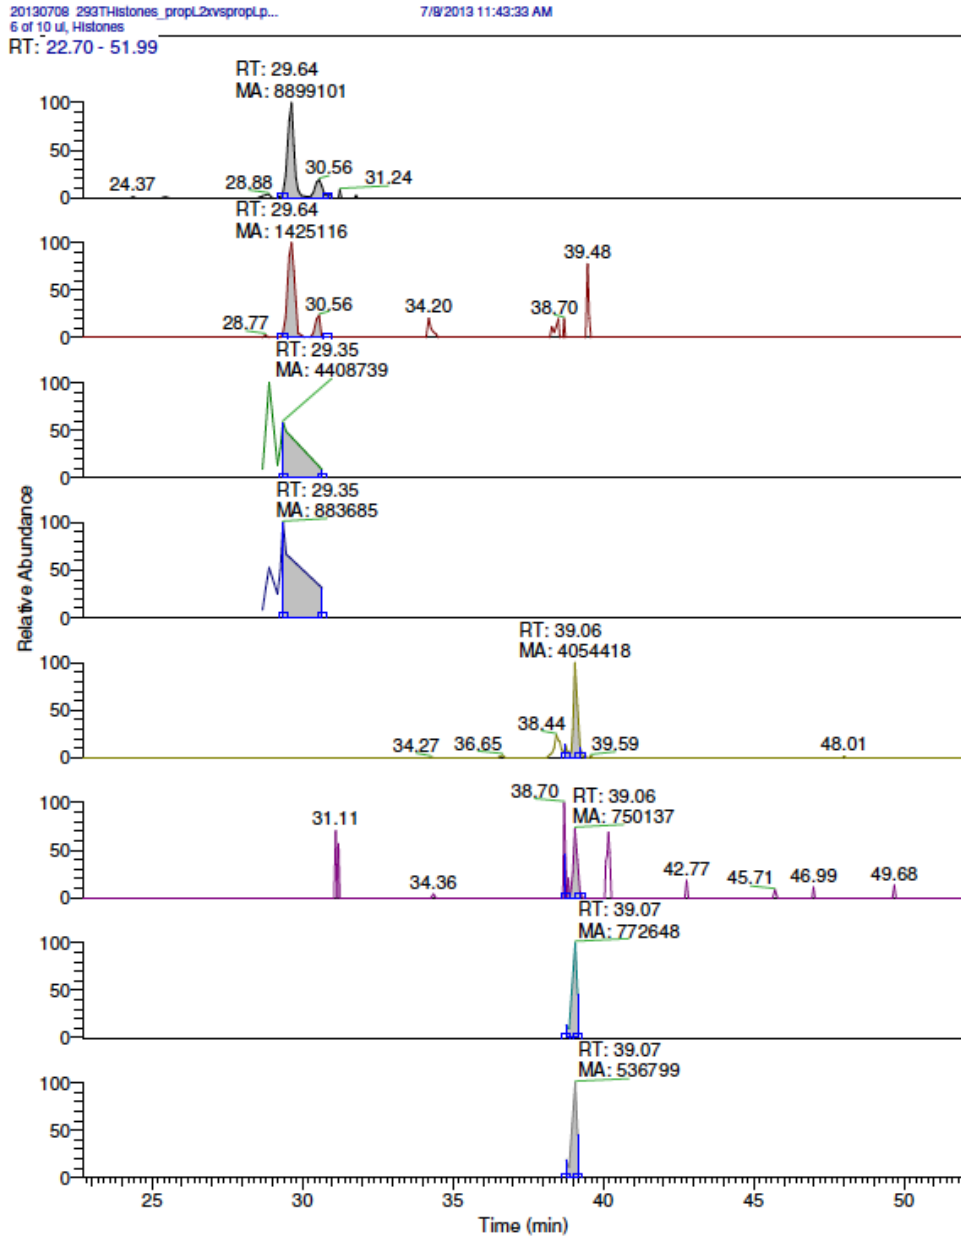

AUC calculation on MS2 level:

XIC-Prop 418.75 (4+)  
 227.18, 370.23, 441.27, 481.80,  
 532.32, 567.84, 616.37

XIC-PIC 434.51 (4+)  
 290.19, 433.24, 481.80, 504.28,  
 532.32, 567.84, 616.37

## Quanti event: 29.2-30.2min >

| injection                                           | peptide                               | charge | m/z      | auc    |
|-----------------------------------------------------|---------------------------------------|--------|----------|--------|
| 20130708_293THistones_propL2xvspropLpicL_H3incl_TMM | H3.1K27Me3S28PropK36Me2 [prop_d0]     | 2      | 836.4989 | 0.0e+0 |
| 20130708_293THistones_propL2xvspropLpicL_H3incl_TMM | H3.1K27Me3S28PropK36Me2 [pic,prop_d0] | 2      | 868.0043 | 0.0e+0 |
| 20130708_293THistones_propL2xvspropLpicL_H3incl_TMM | H3.1K27Me3S28PropK36Me2 [prop_d0]     | 3      | 558.0017 | 1.2e+6 |
| 20130708_293THistones_propL2xvspropLpicL_H3incl_TMM | H3.1K27Me3S28PropK36Me2 [pic,prop_d0] | 3      | 579.0053 | 0.0e+0 |
| 20130708_293THistones_propL2xvspropLpicL_H3incl_TMM | H3.1K27Me3S28PropK36Me2 [prop_d0]     | 4      | 418.7531 | 7.3e+6 |
| 20130708_293THistones_propL2xvspropLpicL_H3incl_TMM | H3.1K27Me3S28PropK36Me2 [pic,prop_d0] | 4      | 434.5058 | 0.0e+0 |

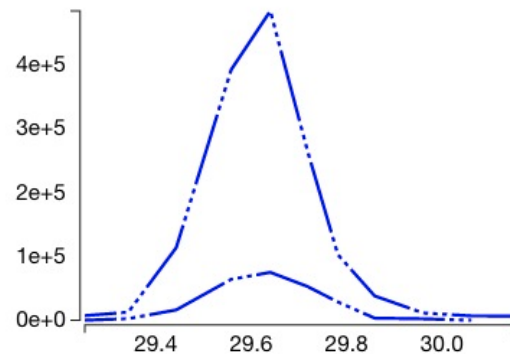

## Quanti event: 37.9-38.9min ✕

| injection                                           | peptide                               | charge | m/z      | auc    |
|-----------------------------------------------------|---------------------------------------|--------|----------|--------|
| 20130708_293THistones_propL2xvspropLpicL_H3incl_TMM | H3.1K27Me3S28PropK36Me2 [prop_d0]     | 2      | 836.4989 | 0.0e+0 |
| 20130708_293THistones_propL2xvspropLpicL_H3incl_TMM | H3.1K27Me3S28PropK36Me2 [pic,prop_d0] | 2      | 868.0043 | 7.4e+4 |
| 20130708_293THistones_propL2xvspropLpicL_H3incl_TMM | H3.1K27Me3S28PropK36Me2 [prop_d0]     | 3      | 558.0017 | 1.5e+5 |
| 20130708_293THistones_propL2xvspropLpicL_H3incl_TMM | H3.1K27Me3S28PropK36Me2 [pic,prop_d0] | 3      | 579.0053 | 2.7e+4 |
| 20130708_293THistones_propL2xvspropLpicL_H3incl_TMM | H3.1K27Me3S28PropK36Me2 [prop_d0]     | 4      | 418.7531 | 0.0e+0 |
| 20130708_293THistones_propL2xvspropLpicL_H3incl_TMM | H3.1K27Me3S28PropK36Me2 [pic,prop_d0] | 4      | 434.5058 | 1.8e+6 |

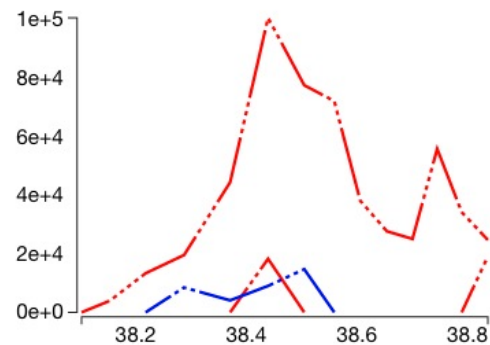

# H3.1\_K27-R40: Prop-KMe3SPropAPATGGVKMe2KPHR MS/MS

### Experimental spectrum

scan 4104  
 retention time 29.6min  
 precursor m/z 418.7527  
 precursor charge 4+

### Theoretical

M H<sup>4+</sup> 418.7531  
 MH Δ<sub>mass</sub> Da -0.0015  
 MH Δ<sub>mass</sub> ppm -0.9

### edit peptide

{Propionyl}K{Trimethyl}S{Propionyl}APATGGVK{Dimethyl}K{Propionyl}PHR align

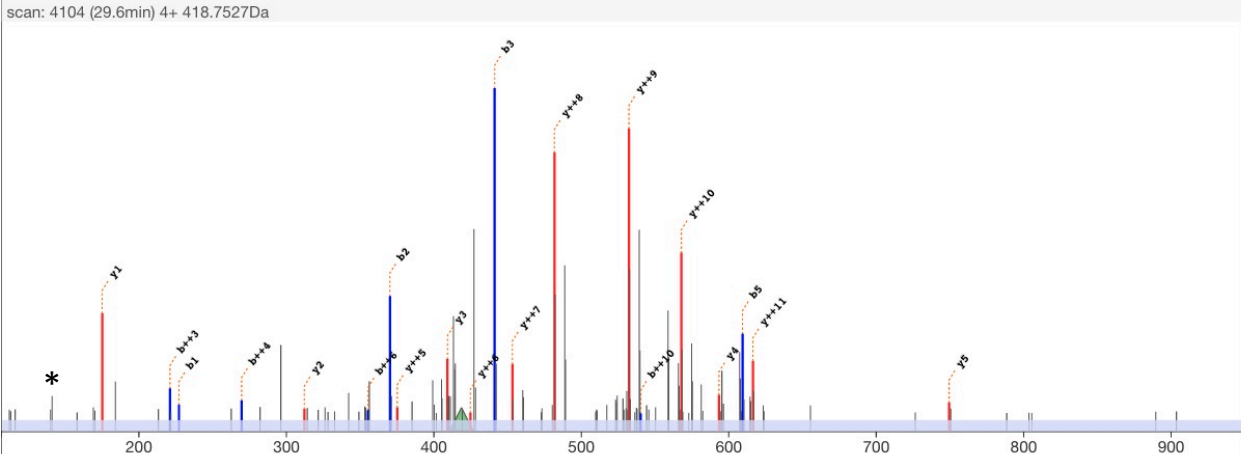

|    | b++    | b       |           | y       | y++    |    |
|----|--------|---------|-----------|---------|--------|----|
|    |        |         | Propionyl | 1615.96 | 808.49 | 14 |
| 1  | 114.09 | 227.18  | K         |         |        |    |
|    |        |         | Trimethyl | 1445.82 | 723.41 | 13 |
| 2  | 185.62 | 370.23  | S         |         |        |    |
|    |        |         | Propionyl | 1302.76 | 651.89 | 12 |
| 3  | 221.14 | 441.27  | A         |         | 616.37 | 11 |
| 4  | 269.67 | 538.32  | P         |         | 567.84 | 10 |
| 5  | 305.18 | 609.36  | A         |         | 532.32 | 9  |
| 6  | 355.71 | 710.41  | T         |         | 481.80 | 8  |
| 7  | 384.22 | 767.43  | G         |         | 453.29 | 7  |
| 8  | 412.73 | 824.45  | G         |         |        |    |
| 9  | 462.26 | 923.52  | V         |         |        |    |
| 10 | 540.33 | 1079.65 | K         | 749.48  | 375.24 | 5  |
| 11 | 632.39 | 1263.77 | Dimethyl  | 593.35  | 297.18 | 4  |
| 12 | 680.91 | 1360.82 | K         |         |        |    |
| 13 | 749.44 | 1497.88 | Propionyl | 409.23  | 205.12 | 3  |
| 14 | 827.49 | 1653.98 | P         |         |        |    |
|    |        |         | H         | 312.18  | 156.59 | 2  |
|    |        |         | R         | 175.12  | 88.06  | 1  |

\* = 140Da diagnostic ion

# H3.1\_K27-R40: PIC-KMe3SPropAPATGGVKMe2KPHR MS/MS

### Experimental spectrum

scan 6224  
 retention time 38.5min  
 precursor m/z 434.5055  
 precursor charge 4+

### Theoretical

M H<sup>4+</sup> 434.5058  
 MH Δ<sub>mass</sub> Da -0.0012  
 MH Δ<sub>mass</sub> ppm -0.7

### edit peptide

{PIC}K{Trimethyl}S{Propionyl}APATGGVK{Dimethyl}K{Propionyl}PHR

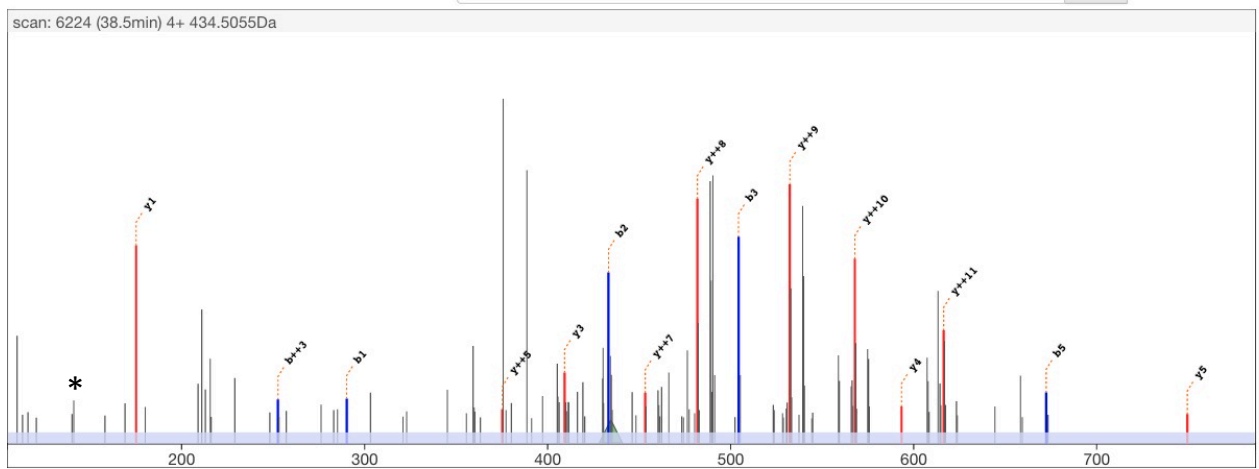

|    | b++    | b       |           | y       | y++    |    |
|----|--------|---------|-----------|---------|--------|----|
|    | 60.53  | 120.04  | PIC       | 1615.96 | 808.49 | 14 |
| 1  | 145.60 | 290.19  | K         | 1445.82 | 723.41 | 13 |
| 2  | 217.13 | 433.24  | S         | 1302.76 | 651.89 | 12 |
| 3  | 252.64 | 504.28  | Propionyl | 1231.73 | 616.37 | 11 |
| 4  | 301.17 | 601.33  | A         | 1134.67 | 567.84 | 10 |
| 5  | 336.69 | 672.37  | P         | 1063.64 | 532.32 | 9  |
| 6  | 387.21 | 773.42  | A         | 962.59  | 481.80 | 8  |
| 7  | 415.72 | 830.44  | T         | 905.57  | 453.29 | 7  |
| 8  | 444.23 | 887.46  | G         | 848.55  | 424.78 | 6  |
| 9  | 493.77 | 986.53  | V         | 749.48  | 375.24 | 5  |
| 10 | 571.83 | 1142.66 | K         | 593.35  | 297.18 | 4  |
| 11 | 663.89 | 1326.78 | Dimethyl  | 409.23  | 205.12 | 3  |
| 12 | 712.42 | 1423.83 | K         | 312.18  | 156.59 | 2  |
| 13 | 780.95 | 1560.89 | Propionyl | 175.12  | 88.06  | 1  |
| 14 | 859.00 | 1716.99 | P         |         |        |    |
|    |        |         | H         |         |        |    |
|    |        |         | R         |         |        |    |

\* = 140Da diagnostic ion

# H3.1\_K27-R40:

KMe3SAPATPropGGVKMe2KPHR

Overlaps with K27Me2,K36me3,T32Prop (see page 329).

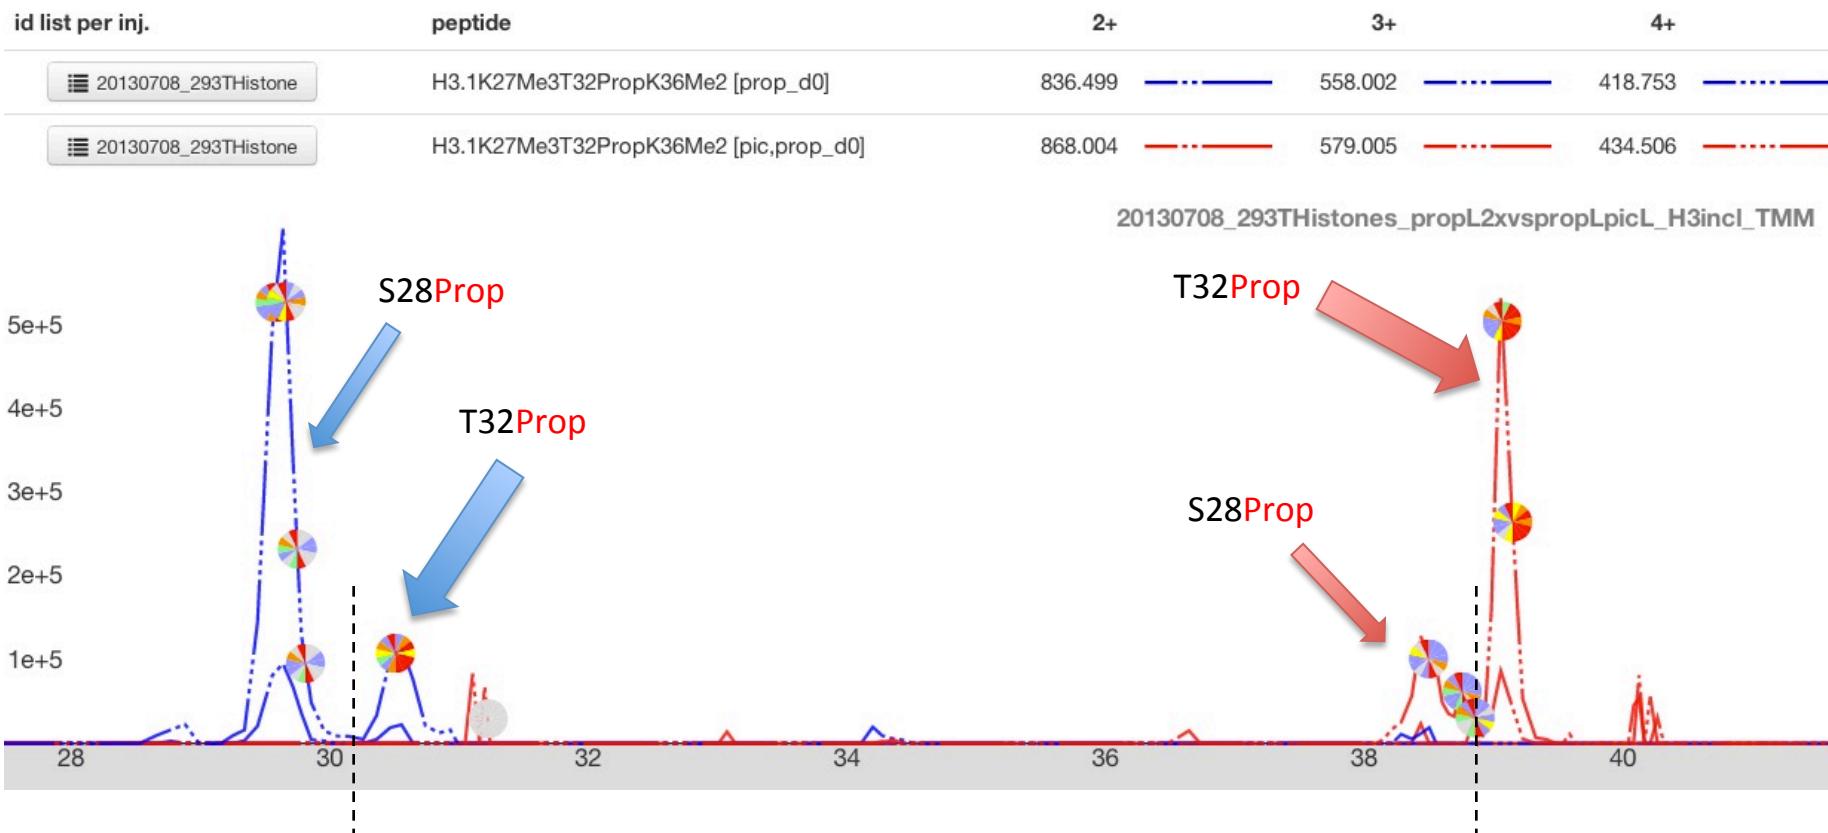

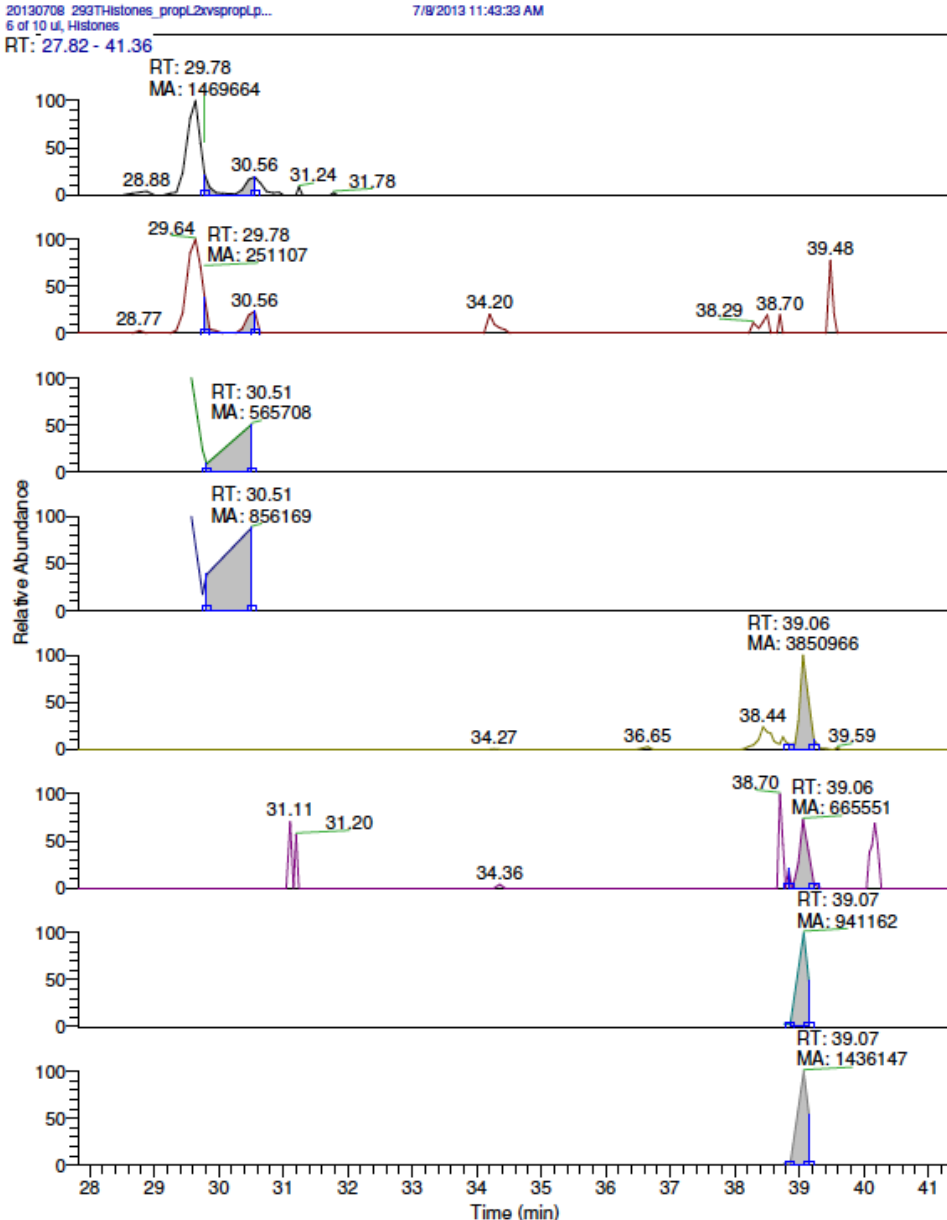

AUC calculation on MS2 level:

XIC-Prop 418.75 (4+)  
 227.18, 314.21, 385.24, 481.80,  
 560.34, 595.85, 644.38

XIC-PIC 434.51 (4+)  
 290.19, 377.22, 448.26, 481.80,  
 560.34, 595.85, 644.38

**Quanti event: 30.3-31.0min**

| injection                                           | peptide                               | charge | m/z      | auc    |
|-----------------------------------------------------|---------------------------------------|--------|----------|--------|
| 20130708_293THistones_propL2xvspropLpicL_H3incl_TMM | H3.1K27Me3T32PropK36Me2 [prop_d0]     | 2      | 836.4989 | 0.0e+0 |
| 20130708_293THistones_propL2xvspropLpicL_H3incl_TMM | H3.1K27Me3T32PropK36Me2 [pic,prop_d0] | 2      | 868.0043 | 0.0e+0 |
| 20130708_293THistones_propL2xvspropLpicL_H3incl_TMM | H3.1K27Me3T32PropK36Me2 [prop_d0]     | 3      | 558.0017 | 1.9e+5 |
| 20130708_293THistones_propL2xvspropLpicL_H3incl_TMM | H3.1K27Me3T32PropK36Me2 [pic,prop_d0] | 3      | 579.0053 | 0.0e+0 |
| 20130708_293THistones_propL2xvspropLpicL_H3incl_TMM | H3.1K27Me3T32PropK36Me2 [prop_d0]     | 4      | 418.7531 | 1.5e+6 |
| 20130708_293THistones_propL2xvspropLpicL_H3incl_TMM | H3.1K27Me3T32PropK36Me2 [pic,prop_d0] | 4      | 434.5058 | 0.0e+0 |

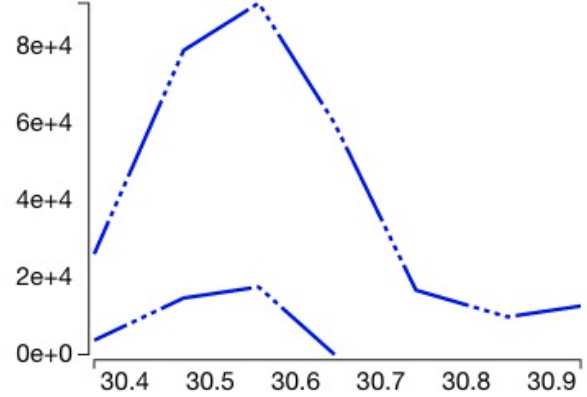

**Quanti event: 38.9-39.4min**

| injection                                           | peptide                               | charge | m/z      | auc    |
|-----------------------------------------------------|---------------------------------------|--------|----------|--------|
| 20130708_293THistones_propL2xvspropLpicL_H3incl_TMM | H3.1K27Me3T32PropK36Me2 [prop_d0]     | 2      | 836.4989 | 0.0e+0 |
| 20130708_293THistones_propL2xvspropLpicL_H3incl_TMM | H3.1K27Me3T32PropK36Me2 [pic,prop_d0] | 2      | 868.0043 | 0.0e+0 |
| 20130708_293THistones_propL2xvspropLpicL_H3incl_TMM | H3.1K27Me3T32PropK36Me2 [prop_d0]     | 3      | 558.0017 | 0.0e+0 |
| 20130708_293THistones_propL2xvspropLpicL_H3incl_TMM | H3.1K27Me3T32PropK36Me2 [pic,prop_d0] | 3      | 579.0053 | 6.4e+5 |
| 20130708_293THistones_propL2xvspropLpicL_H3incl_TMM | H3.1K27Me3T32PropK36Me2 [prop_d0]     | 4      | 418.7531 | 0.0e+0 |
| 20130708_293THistones_propL2xvspropLpicL_H3incl_TMM | H3.1K27Me3T32PropK36Me2 [pic,prop_d0] | 4      | 434.5058 | 3.9e+6 |

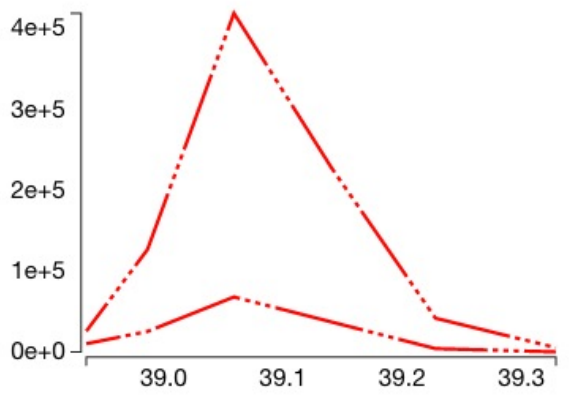



# H3.1\_K27-R40: Prop-KMe3SAPATPropGGVKMe2KPHR MS/MS

### Experimental spectrum

scan 4266  
 retention time 30.5min  
 precursor m/z 418.7523  
 precursor charge 4+

### Theoretical

M H<sup>4+</sup> 418.7531  
 MH Δ<sub>mass</sub> Da -0.0029  
 MH Δ<sub>mass</sub> ppm -1.7

### edit peptide

{Propionyl}K{Trimethyl}SAPAT{Propionyl}GGVK{Dimethyl}K{Propionyl}PHR

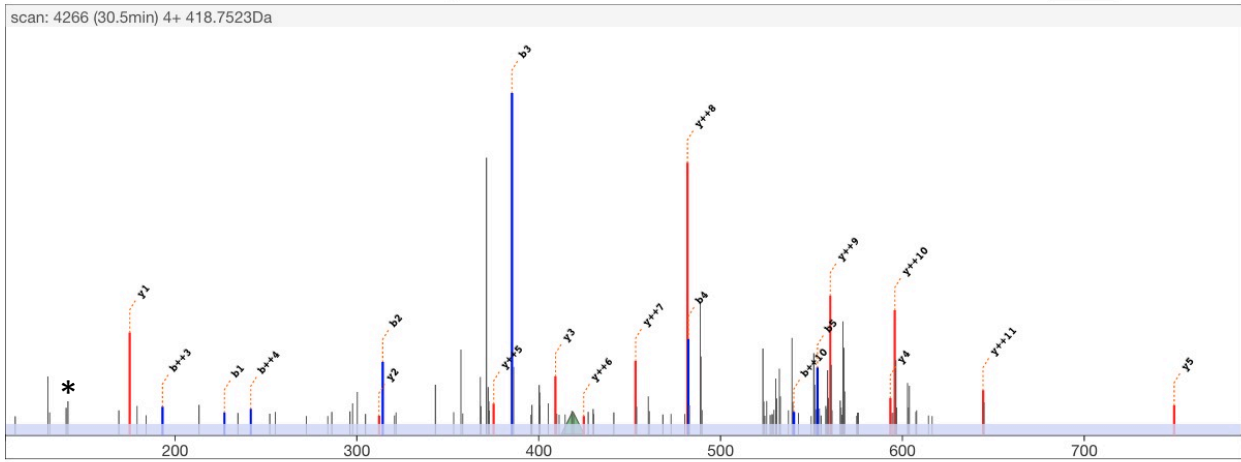

|    | b++    | b       |           | y       | y++    |    |
|----|--------|---------|-----------|---------|--------|----|
|    |        |         | Propionyl | 1615.96 | 808.49 | 14 |
| 1  | 114.09 | 227.18  | K         |         |        |    |
|    |        |         | Trimethyl | 1445.82 | 723.41 | 13 |
| 2  | 157.61 | 314.21  | S         | 1358.79 | 679.90 | 12 |
| 3  | 193.13 | 385.24  | A         | 1287.75 | 644.38 | 11 |
| 4  | 241.65 | 482.30  | P         | 1190.70 | 595.85 | 10 |
| 5  | 277.17 | 553.33  | A         | 1119.66 | 560.34 | 9  |
| 6  | 355.71 | 710.41  | T         | 962.59  | 481.80 | 8  |
|    |        |         | Propionyl |         |        |    |
| 7  | 384.22 | 767.43  | G         | 905.57  | 453.29 | 7  |
| 8  | 412.73 | 824.45  | V         | 848.55  | 424.78 | 6  |
| 9  | 462.26 | 923.52  | K         | 749.48  | 375.24 | 5  |
| 10 | 540.33 | 1079.65 | Dimethyl  | 593.35  | 297.18 | 4  |
| 11 | 632.39 | 1263.77 | Propionyl | 409.23  | 205.12 | 3  |
| 12 | 680.91 | 1360.82 | K         |         |        |    |
| 13 | 749.44 | 1497.88 | P         | 312.18  | 156.59 | 2  |
|    |        |         | H         |         |        |    |
| 14 | 827.49 | 1653.98 | R         | 175.12  | 88.06  | 1  |

\* = 140Da diagnostic ion

**Experimental spectrum**

scan 6403  
 retention time 39.1min  
 precursor m/z 434.5054  
 precursor charge 4+

**Theoretical**

M H<sup>+</sup> 434.5058  
 MH Δ<sub>mass</sub> Da -0.0017  
 MH Δ<sub>mass</sub> ppm -1.0

**edit peptide**

{PIC}K{Trimethyl}SAPATPropGGVK{Dimethyl}K{Propionyl}PHR

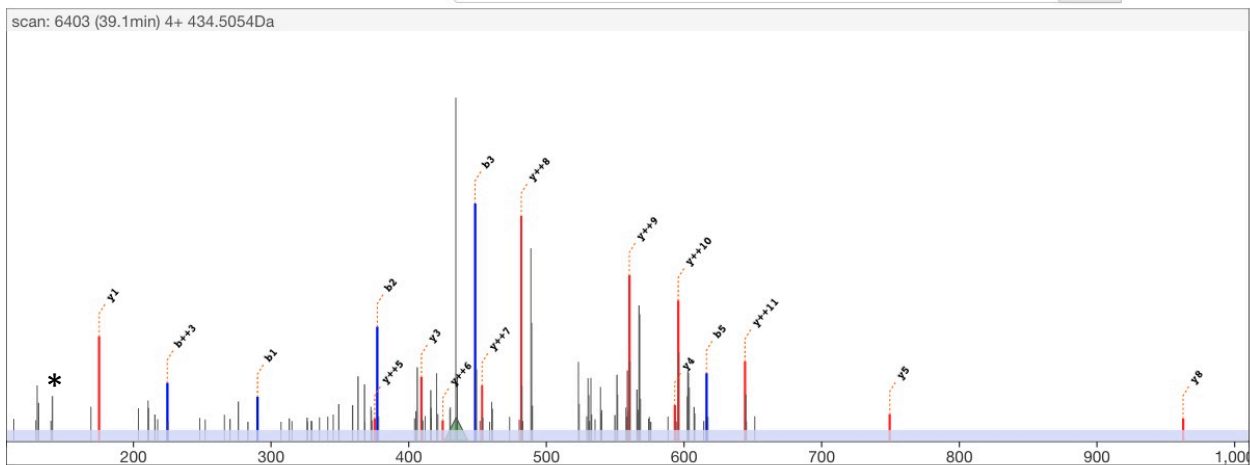

|    | b++    | b       |                | y       | y++    |    |
|----|--------|---------|----------------|---------|--------|----|
|    | 60.53  | 120.04  | PIC            | 1615.96 | 808.49 | 14 |
| 1  | 145.60 | 290.19  | K<br>Trimethyl | 1445.82 | 723.41 | 13 |
| 2  | 189.11 | 377.22  | S              | 1358.79 | 679.90 | 12 |
| 3  | 224.63 | 448.26  | A              | 1287.75 | 644.38 | 11 |
| 4  | 273.16 | 545.31  | P              | 1190.70 | 595.85 | 10 |
| 5  | 308.68 | 616.35  | A              | 1119.66 | 560.34 | 9  |
| 6  | 387.21 | 773.42  | T<br>Propionyl | 962.59  | 481.80 | 8  |
| 7  | 415.72 | 830.44  | G              | 905.57  | 453.29 | 7  |
| 8  | 444.23 | 887.46  | V              | 848.55  | 424.78 | 6  |
| 9  | 493.77 | 986.53  | G              | 749.48  | 375.24 | 5  |
| 10 | 571.83 | 1142.66 | V<br>Dimethyl  | 593.35  | 297.18 | 4  |
| 11 | 663.89 | 1326.78 | K<br>Propionyl | 409.23  | 205.12 | 3  |
| 12 | 712.42 | 1423.83 | P              | 312.18  | 156.59 | 2  |
| 13 | 780.95 | 1560.89 | H              | 175.12  | 88.06  | 1  |
| 14 | 859.00 | 1716.99 | R              |         |        |    |

\* = 140Da diagnostic ion

# H3.1\_K27-R40:

**KA**cSAPATGGVK**Me**2KPHR

+4 charged peptides omitted: no MS2 and peaks not overlapping/similar shape

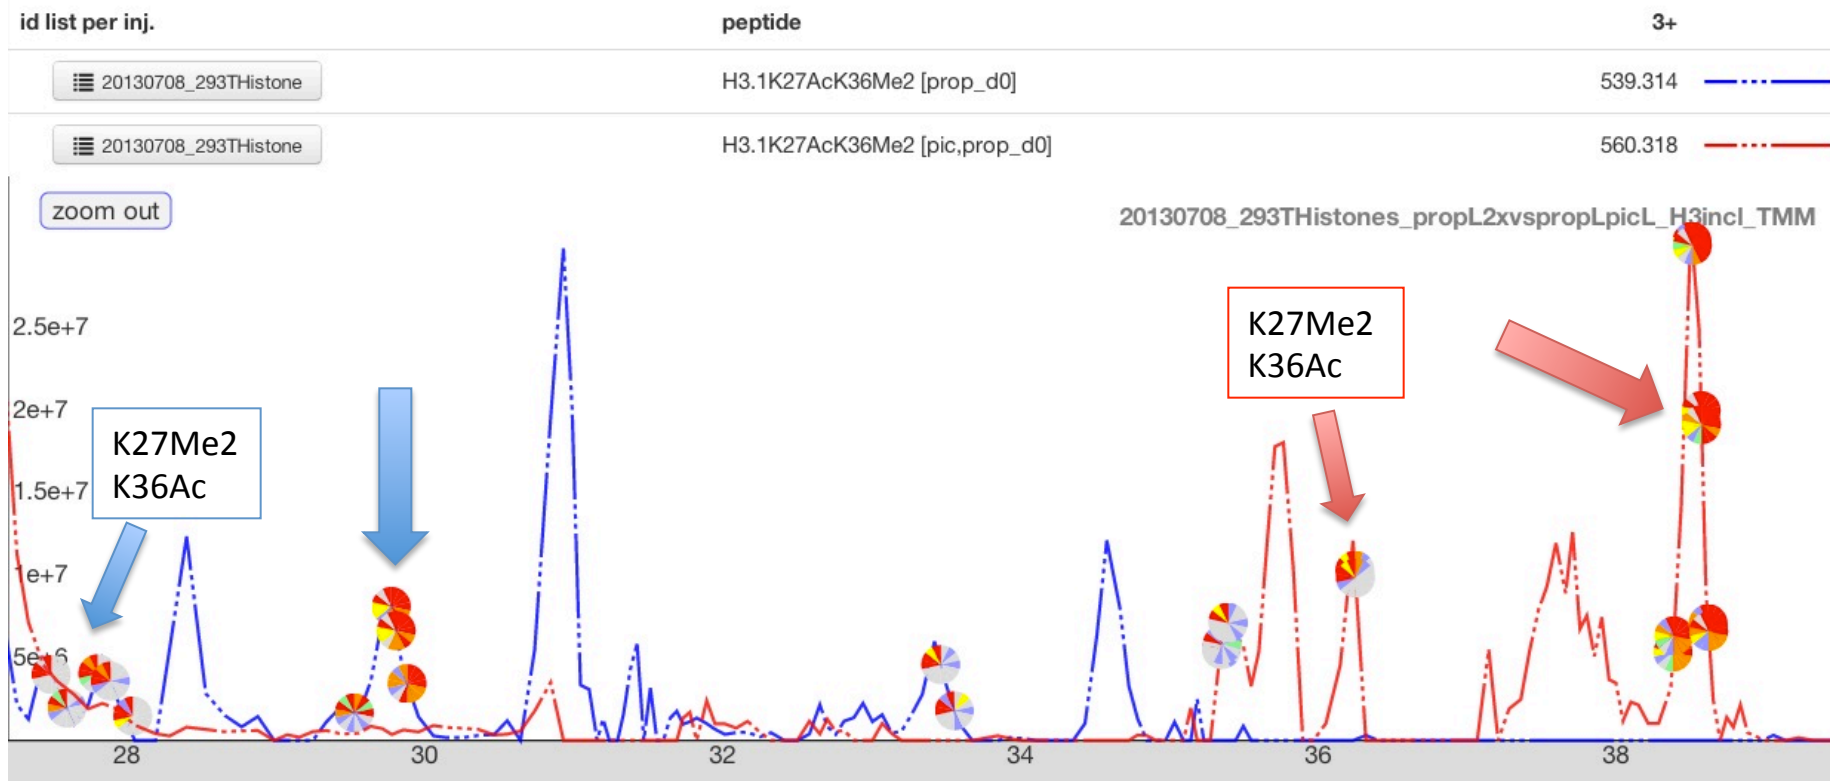

Quanti event: 29.2-30.3min

| injection                                           | peptide                       | charge | m/z      | auc    |
|-----------------------------------------------------|-------------------------------|--------|----------|--------|
| 20130708_293THistones_propL2xvspropLpicL_H3incl_TMM | H3.1K27AcK36Me2 [prop_d0]     | 3      | 539.3141 | 2.9e+6 |
| 20130708_293THistones_propL2xvspropLpicL_H3incl_TMM | H3.1K27AcK36Me2 [pic,prop_d0] | 3      | 560.3178 | 6.5e+5 |

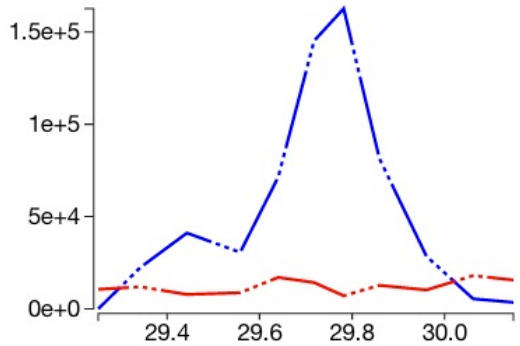

Quanti event: 38.3-39.0min

| injection                                           | peptide                       | charge | m/z      | auc    |
|-----------------------------------------------------|-------------------------------|--------|----------|--------|
| 20130708_293THistones_propL2xvspropLpicL_H3incl_TMM | H3.1K27AcK36Me2 [prop_d0]     | 3      | 539.3141 | 0.0e+0 |
| 20130708_293THistones_propL2xvspropLpicL_H3incl_TMM | H3.1K27AcK36Me2 [pic,prop_d0] | 3      | 560.3178 | 6.2e+6 |

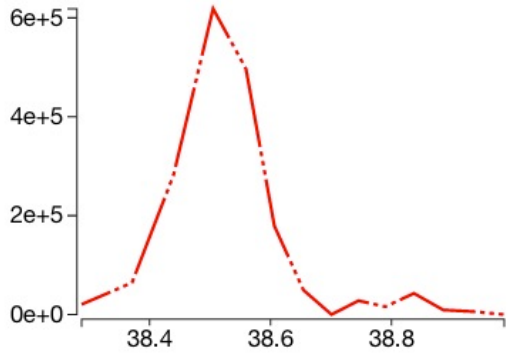

# H3.1\_K27-R40: Prop-KAcSAPATGGVKMe2KPHR MS/MS

**Experimental spectrum**

scan 4145  
 retention time 29.8min  
 precursor m/z 539.3140  
 precursor charge 3+

**Theoretical**

M H<sup>3+</sup> 539.3141  
 MH Δ<sub>mass</sub> Da -0.0005  
 MH Δ<sub>mass</sub> ppm -0.3

**edit peptide**

{Propionyl}K{Acetyl}SAPATGGVK{Dimethyl}K{Propionyl}PHR align

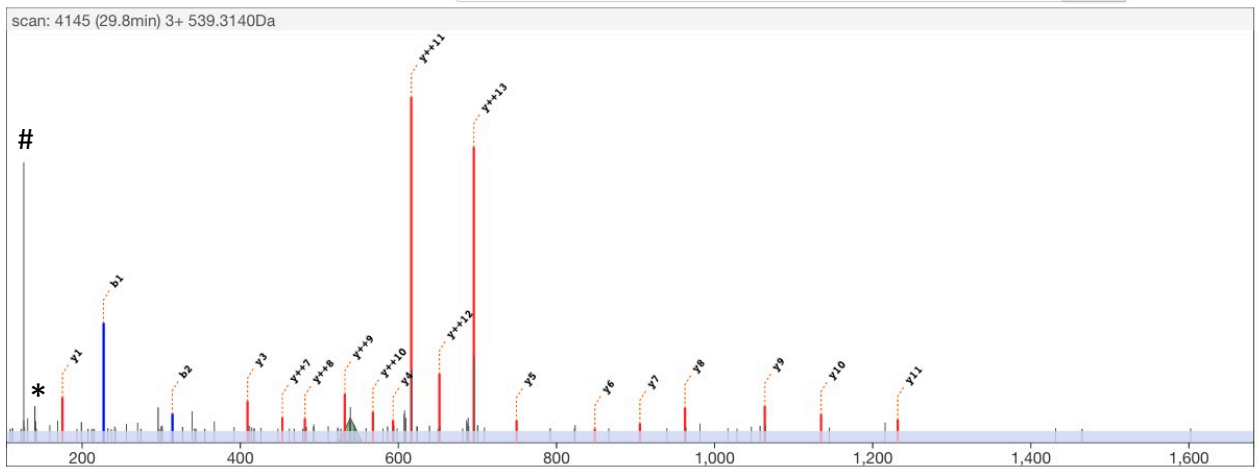

|    | b++    | b       |           | y       | y++    |    |
|----|--------|---------|-----------|---------|--------|----|
|    |        |         | Propionyl | 1559.90 | 780.45 | 14 |
| 1  | 114.07 | 227.14  | K         |         |        |    |
|    |        |         | Acetyl    | 1389.80 | 695.40 | 13 |
| 2  | 157.59 | 314.17  | S         |         |        |    |
|    |        |         | A         | 1302.76 | 651.89 | 12 |
| 3  | 193.11 | 385.21  | P         | 1231.73 | 616.37 | 11 |
|    |        |         | A         | 1134.67 | 567.84 | 10 |
| 4  | 241.63 | 482.26  | T         | 1063.64 | 532.32 | 9  |
|    |        |         | G         | 962.59  | 481.80 | 8  |
| 5  | 277.15 | 553.30  | V         | 905.57  | 453.29 | 7  |
|    |        |         | G         | 848.55  | 424.78 | 6  |
| 6  | 327.68 | 654.35  | V         | 749.48  | 375.24 | 5  |
|    |        |         | Dimethyl  | 593.35  | 297.18 | 4  |
| 7  | 356.19 | 711.37  | K         | 409.23  | 205.12 | 3  |
|    |        |         | Propionyl |         |        |    |
| 8  | 384.70 | 768.39  | P         |         |        |    |
|    |        |         | H         | 312.18  | 156.59 | 2  |
| 9  | 434.23 | 867.46  | R         | 175.12  | 88.06  | 1  |
| 10 | 512.30 | 1023.58 |           |         |        |    |
| 11 | 604.36 | 1207.70 |           |         |        |    |
| 12 | 652.88 | 1304.76 |           |         |        |    |
| 13 | 721.41 | 1441.82 |           |         |        |    |
| 14 | 799.46 | 1597.92 |           |         |        |    |

\* = 140Da diagnostic ion  
 # = 126Da diagnostic ion

# H3.1\_K27-R40: PIC-KAcSAPATGGVKMe2KPHR MS/MS

**Experimental spectrum**

scan 6226  
 retention time 38.5min  
 precursor m/z 560.3185  
 precursor charge 3+

**Theoretical**

M H<sup>3+</sup> 560.3178  
 MH Δ<sub>mass</sub> Da 0.0023  
 MH Δ<sub>mass</sub> ppm 1.4

**edit peptide**

{PIC}K{Acetyl}SAPATGGVK{Dimethyl}K{Propionyl}PHR

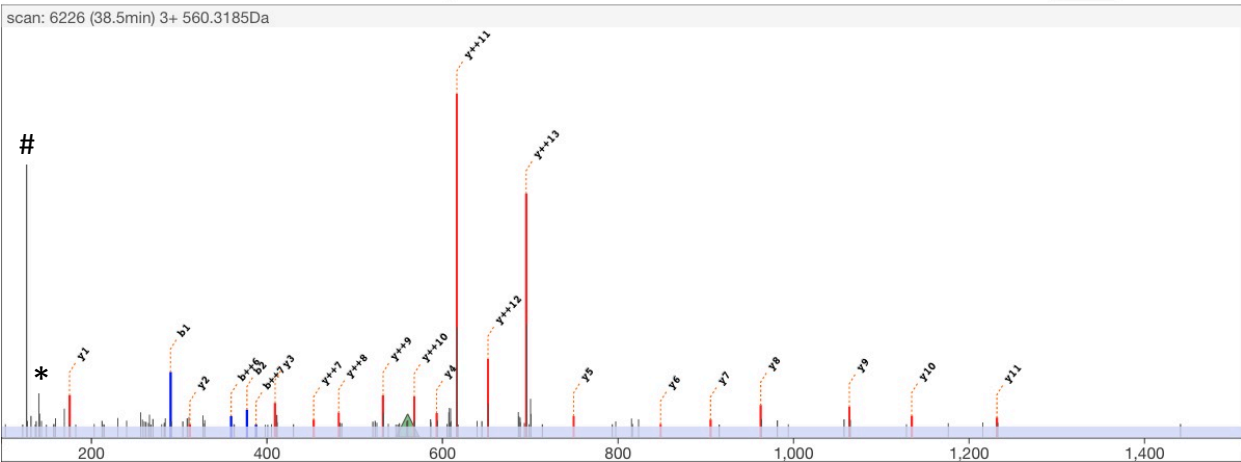

|    | b++    | b       |           | y       | y++    |    |
|----|--------|---------|-----------|---------|--------|----|
|    | 60.53  | 120.04  | PIC       | 1559.90 | 780.45 | 14 |
| 1  | 145.58 | 290.15  | K         | 1389.80 | 695.40 | 13 |
| 2  | 189.09 | 377.18  | Acetyl    | 1302.76 | 651.89 | 12 |
| 3  | 224.61 | 448.22  | S         | 1231.73 | 616.37 | 11 |
| 4  | 273.14 | 545.27  | A         | 1134.67 | 567.84 | 10 |
| 5  | 308.66 | 616.31  | P         | 1063.64 | 532.32 | 9  |
| 6  | 359.18 | 717.36  | A         | 962.59  | 481.80 | 8  |
| 7  | 387.69 | 774.38  | T         | 905.57  | 453.29 | 7  |
| 8  | 416.20 | 831.40  | G         | 848.55  | 424.78 | 6  |
| 9  | 465.74 | 930.47  | V         | 749.48  | 375.24 | 5  |
| 10 | 543.80 | 1086.59 | K         | 593.35  | 297.18 | 4  |
| 11 | 635.86 | 1270.72 | Dimethyl  | 409.23  | 205.12 | 3  |
| 12 | 684.39 | 1367.77 | K         | 312.18  | 156.59 | 2  |
| 13 | 752.92 | 1504.83 | Propionyl | 175.12  | 88.06  | 1  |
| 14 | 830.97 | 1660.93 | P         |         |        |    |
|    |        |         | H         |         |        |    |
|    |        |         | R         |         |        |    |

\* = 140Da diagnostic ion  
 # = 126Da diagnostic ion

# H3.1\_K27-R40:

## KMe1SAPATGGVKMe3KPHR

| id list per inj.     | peptide                       | 2+      | 3+      | 4+      | 5+      |
|----------------------|-------------------------------|---------|---------|---------|---------|
| 20130708_293THistone | H3.1K27MeK36Me3 [prop_d0]     | 829.491 | 553.330 | 415.249 | 332.401 |
| 20130708_293THistone | H3.1K27MeK36Me3 [pic,prop_d0] | 860.996 | 574.333 | 431.002 | 345.003 |

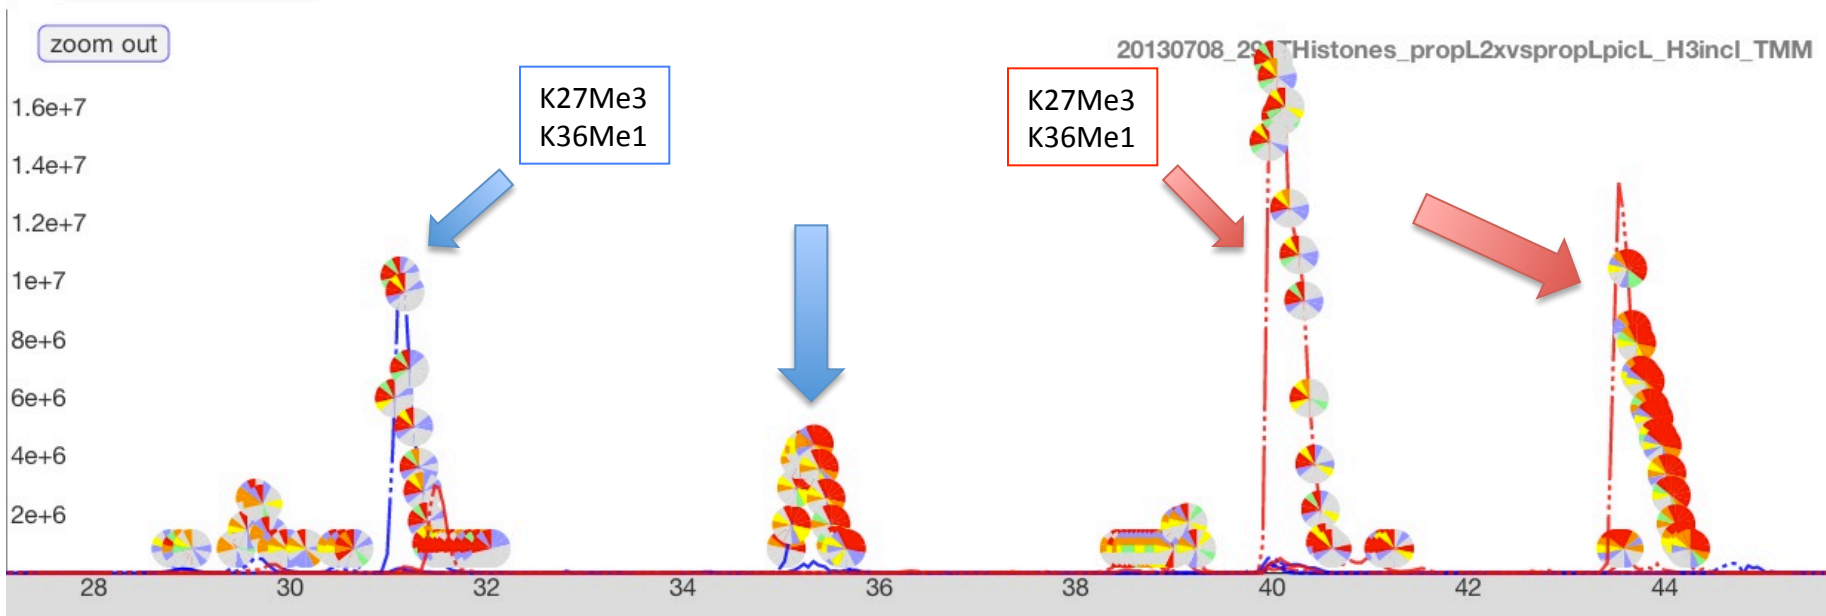

## Quanti event: 33.9-37.1min

| injection                                           | peptide                          | charge | m/z      | auc    |
|-----------------------------------------------------|----------------------------------|--------|----------|--------|
| 20130708_293THistones_propL2xvspropLpicL_H3incl_TMM | H3.1K27MeK36Me3 [prop_d0]        | 2      | 829.4910 | 6.8e+6 |
| 20130708_293THistones_propL2xvspropLpicL_H3incl_TMM | H3.1K27MeK36Me3<br>[pic,prop_d0] | 2      | 860.9965 | 0.0e+0 |
| 20130708_293THistones_propL2xvspropLpicL_H3incl_TMM | H3.1K27MeK36Me3 [prop_d0]        | 3      | 553.3298 | 9.8e+7 |
| 20130708_293THistones_propL2xvspropLpicL_H3incl_TMM | H3.1K27MeK36Me3<br>[pic,prop_d0] | 3      | 574.3334 | 1.4e+6 |
| 20130708_293THistones_propL2xvspropLpicL_H3incl_TMM | H3.1K27MeK36Me3 [prop_d0]        | 4      | 415.2492 | 1.0e+5 |
| 20130708_293THistones_propL2xvspropLpicL_H3incl_TMM | H3.1K27MeK36Me3<br>[pic,prop_d0] | 4      | 431.0019 | 8.3e+5 |
| 20130708_293THistones_propL2xvspropLpicL_H3incl_TMM | H3.1K27MeK36Me3 [prop_d0]        | 5      | 332.4008 | 0.0e+0 |
| 20130708_293THistones_propL2xvspropLpicL_H3incl_TMM | H3.1K27MeK36Me3<br>[pic,prop_d0] | 5      | 345.0030 | 0.0e+0 |

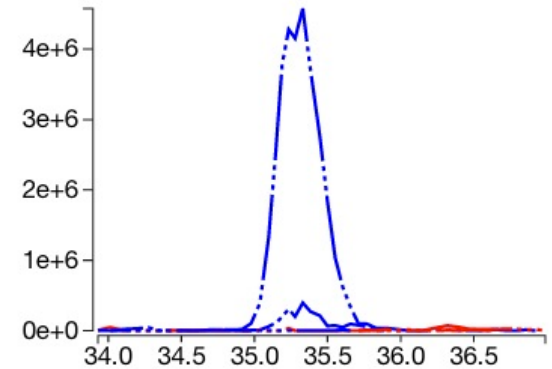

## Quanti event: 42.4-45.0min

| injection                                           | peptide                          | charge | m/z      | auc    |
|-----------------------------------------------------|----------------------------------|--------|----------|--------|
| 20130708_293THistones_propL2xvspropLpicL_H3incl_TMM | H3.1K27MeK36Me3 [prop_d0]        | 2      | 829.4910 | 0.0e+0 |
| 20130708_293THistones_propL2xvspropLpicL_H3incl_TMM | H3.1K27MeK36Me3<br>[pic,prop_d0] | 2      | 860.9965 | 8.7e+6 |
| 20130708_293THistones_propL2xvspropLpicL_H3incl_TMM | H3.1K27MeK36Me3 [prop_d0]        | 3      | 553.3298 | 6.1e+6 |
| 20130708_293THistones_propL2xvspropLpicL_H3incl_TMM | H3.1K27MeK36Me3<br>[pic,prop_d0] | 3      | 574.3334 | 2.9e+8 |
| 20130708_293THistones_propL2xvspropLpicL_H3incl_TMM | H3.1K27MeK36Me3 [prop_d0]        | 4      | 415.2492 | 5.6e+4 |
| 20130708_293THistones_propL2xvspropLpicL_H3incl_TMM | H3.1K27MeK36Me3<br>[pic,prop_d0] | 4      | 431.0019 | 1.5e+5 |
| 20130708_293THistones_propL2xvspropLpicL_H3incl_TMM | H3.1K27MeK36Me3 [prop_d0]        | 5      | 332.4008 | 0.0e+0 |
| 20130708_293THistones_propL2xvspropLpicL_H3incl_TMM | H3.1K27MeK36Me3<br>[pic,prop_d0] | 5      | 345.0030 | 0.0e+0 |

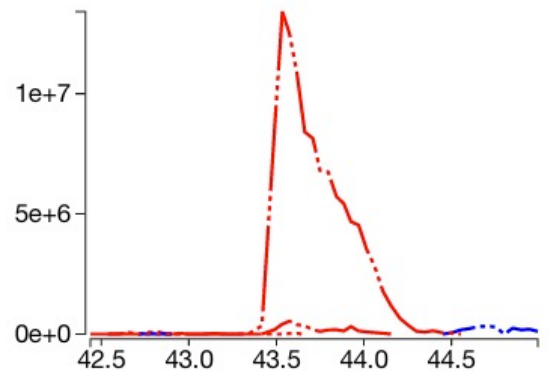



# H3.1\_K27-R40: Prop-KMe1SAPATGGVKMe3KPHR MS/MS

### Experimental spectrum

scan 5444  
 retention time 35.3min  
 precursor m/z 553.3274  
 precursor charge 3+

### Theoretical

M H<sup>3+</sup> 553.3298  
 MH Δ<sub>mass</sub> Da -0.0072  
 MH Δ<sub>mass</sub> ppm -4.3

### edit peptide

{Propionyl}K{Methyl,Propionyl}SAPATGGVK{Trimethyl}K{Propionyl}PHR align

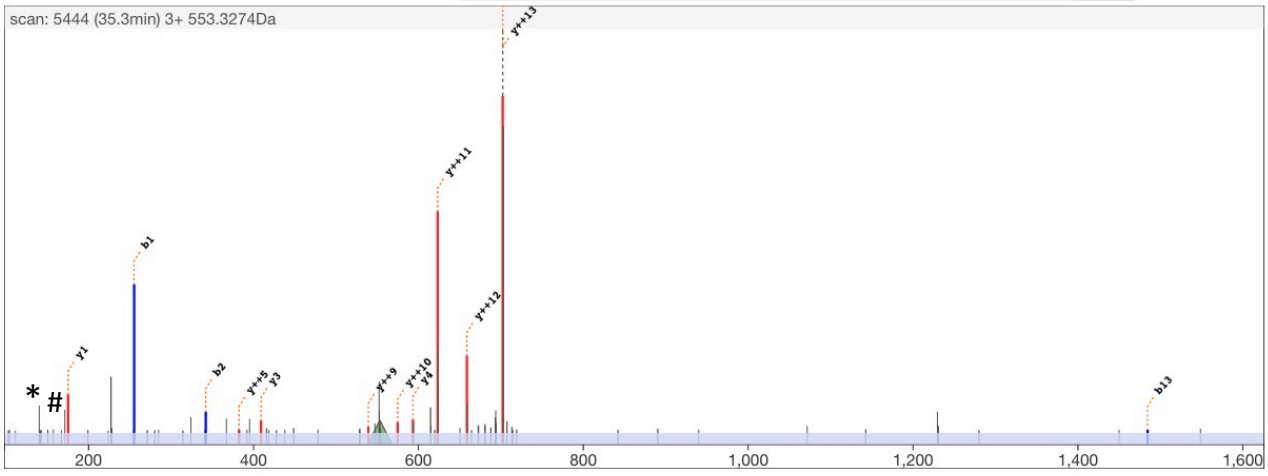

|    | b++    | b       |                  | y       | y++    |    |
|----|--------|---------|------------------|---------|--------|----|
|    |        |         | Propionyl        | 1601.95 | 801.48 | 14 |
| 1  | 128.09 | 255.17  | K                | 1403.81 | 702.41 | 13 |
| 2  | 171.60 | 342.20  | Methyl,Propionyl | 1316.78 | 658.89 | 12 |
| 3  | 207.12 | 413.24  | S                | 1245.74 | 623.37 | 11 |
| 4  | 255.65 | 510.29  | A                | 1148.69 | 574.85 | 10 |
| 5  | 291.17 | 581.33  | P                | 1077.65 | 539.33 | 9  |
| 6  | 341.69 | 682.38  | A                | 976.61  | 488.81 | 8  |
| 7  | 370.20 | 739.40  | T                | 919.58  | 460.30 | 7  |
| 8  | 398.71 | 796.42  | G                | 862.56  | 431.78 | 6  |
| 9  | 448.25 | 895.49  | V                | 763.49  | 382.25 | 5  |
| 10 | 533.32 | 1065.63 | K                | 593.35  | 297.18 | 4  |
| 11 | 625.38 | 1249.75 | Trimethyl        | 409.23  | 205.12 | 3  |
| 12 | 673.91 | 1346.80 | K                | 312.18  | 156.59 | 2  |
| 13 | 742.44 | 1483.86 | Propionyl        | 175.12  | 88.06  | 1  |
| 14 | 820.49 | 1639.96 | P                |         |        |    |
|    |        |         | H                |         |        |    |
|    |        |         | R                |         |        |    |

\* = 140Da diagnostic ion  
 # = 171Da diagnostic ion

# H3.1\_K27-R40: PIC-KMe1SAPATGGVKMe3KPHR MS/MS

**Experimental spectrum**

scan 7746  
 retention time 43.7min  
 precursor m/z 574.3315  
 precursor charge 3+

**Theoretical**

M H<sup>3+</sup> 574.3334  
 MH Δ<sub>mass</sub> Da -0.0058  
 MH Δ<sub>mass</sub> ppm -3.4

**edit peptide**

{PIC}K(Methyl,Propionyl)SAPATGGVK(Trimethyl)K(Propionyl)PHR

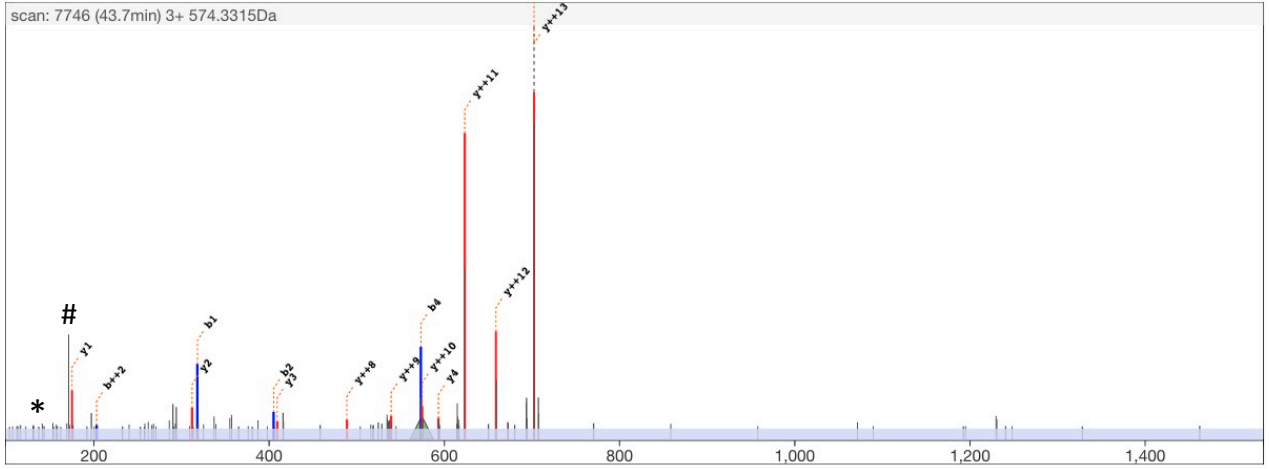

|    | b++    | b       |                  | y       | y++    |    |
|----|--------|---------|------------------|---------|--------|----|
|    | 60.53  | 120.04  | PIC              | 1601.95 | 801.48 | 14 |
| 1  | 159.59 | 318.18  | Methyl,Propionyl | 1403.81 | 702.41 | 13 |
| 2  | 203.11 | 405.21  | K                | 1316.78 | 658.89 | 12 |
| 3  | 238.63 | 476.25  | S                | 1245.74 | 623.37 | 11 |
| 4  | 287.16 | 573.30  | A                | 1148.69 | 574.85 | 10 |
| 5  | 322.67 | 644.34  | P                | 1077.65 | 539.33 | 9  |
| 6  | 373.20 | 745.39  | A                | 976.61  | 488.81 | 8  |
| 7  | 401.71 | 802.41  | T                | 919.58  | 460.30 | 7  |
| 8  | 430.22 | 859.43  | G                | 862.56  | 431.78 | 6  |
| 9  | 479.75 | 958.50  | V                | 763.49  | 382.25 | 5  |
| 10 | 564.82 | 1128.64 | K                | 593.35  | 297.18 | 4  |
| 11 | 656.88 | 1312.76 | Trimethyl        | 409.23  | 205.12 | 3  |
| 12 | 705.41 | 1409.82 | Propionyl        | 312.18  | 156.59 | 2  |
| 13 | 773.94 | 1546.87 | P                | 175.12  | 88.06  | 1  |
| 14 | 851.99 | 1702.98 | H                |         |        |    |
|    |        |         | R                |         |        |    |

\* = 140Da diagnostic ion  
 # = 171Da diagnostic ion

# H3.1\_K27-R40:

# KMe2SAPATGGVKMe3KPHR

Overlaps with K27Me3,K36me2 (see slide 296).

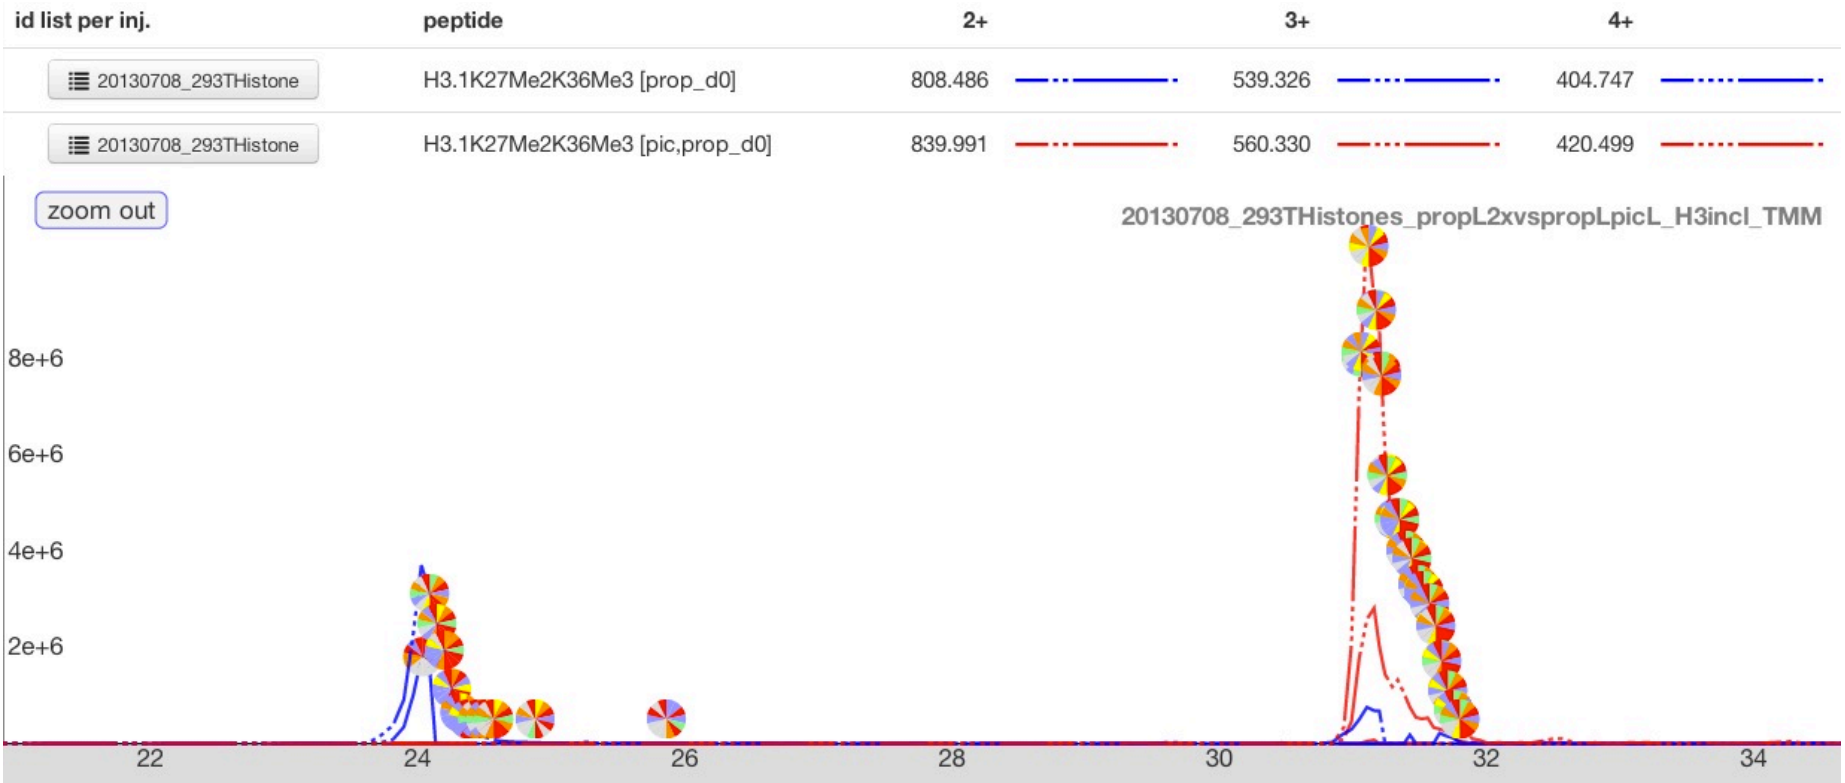

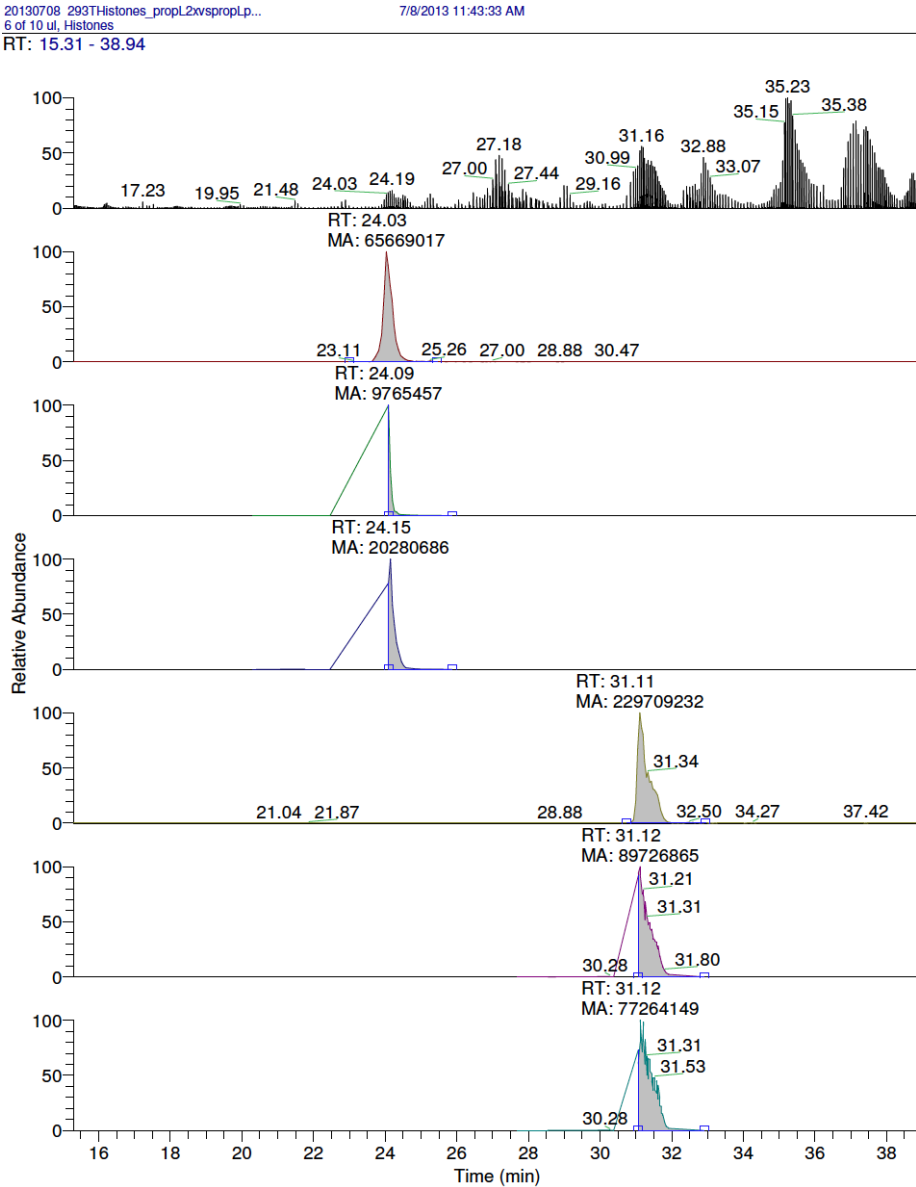

AUC calculation on MS2 level:

XIC-Prop 420.49 (4+)  
 213.16, 300.19, 371.23, 488.81,  
 539.33, 574.85

XIC-PIC 420.49 (4+)  
 276.17, 363.20, 434.24, 488.81,  
 539.33, 574.85

### Quanti event: 23.0-25.6min

| injection                                           | peptide                           | charge | m/z      | auc    |
|-----------------------------------------------------|-----------------------------------|--------|----------|--------|
| 20130708_293THistones_propL2xvspropLpicL_H3incl_TMM | H3.1K27Me2K36Me3<br>[prop_d0]     | 2      | 808.4858 | 1.4e+5 |
| 20130708_293THistones_propL2xvspropLpicL_H3incl_TMM | H3.1K27Me2K36Me3<br>[pic,prop_d0] | 2      | 839.9912 | 0.0e+0 |
| 20130708_293THistones_propL2xvspropLpicL_H3incl_TMM | H3.1K27Me2K36Me3<br>[prop_d0]     | 3      | 539.3263 | 1.8e+7 |
| 20130708_293THistones_propL2xvspropLpicL_H3incl_TMM | H3.1K27Me2K36Me3<br>[pic,prop_d0] | 3      | 560.3299 | 1.8e+5 |
| 20130708_293THistones_propL2xvspropLpicL_H3incl_TMM | H3.1K27Me2K36Me3<br>[prop_d0]     | 4      | 404.7465 | 6.6e+7 |
| 20130708_293THistones_propL2xvspropLpicL_H3incl_TMM | H3.1K27Me2K36Me3<br>[pic,prop_d0] | 4      | 420.4992 | 0.0e+0 |

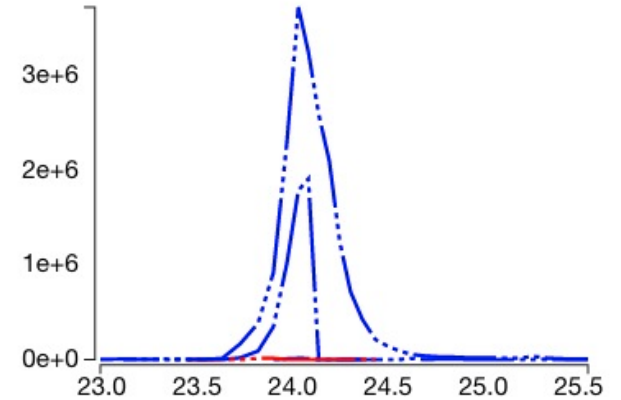

### Quanti event: 30.2-32.3min

| injection                                           | peptide                           | charge | m/z      | auc    |
|-----------------------------------------------------|-----------------------------------|--------|----------|--------|
| 20130708_293THistones_propL2xvspropLpicL_H3incl_TMM | H3.1K27Me2K36Me3<br>[prop_d0]     | 2      | 808.4858 | 0.0e+0 |
| 20130708_293THistones_propL2xvspropLpicL_H3incl_TMM | H3.1K27Me2K36Me3<br>[pic,prop_d0] | 2      | 839.9912 | 3.7e+5 |
| 20130708_293THistones_propL2xvspropLpicL_H3incl_TMM | H3.1K27Me2K36Me3<br>[prop_d0]     | 3      | 539.3263 | 1.2e+7 |
| 20130708_293THistones_propL2xvspropLpicL_H3incl_TMM | H3.1K27Me2K36Me3<br>[pic,prop_d0] | 3      | 560.3299 | 5.3e+7 |
| 20130708_293THistones_propL2xvspropLpicL_H3incl_TMM | H3.1K27Me2K36Me3<br>[prop_d0]     | 4      | 404.7465 | 0.0e+0 |
| 20130708_293THistones_propL2xvspropLpicL_H3incl_TMM | H3.1K27Me2K36Me3<br>[pic,prop_d0] | 4      | 420.4992 | 2.3e+8 |

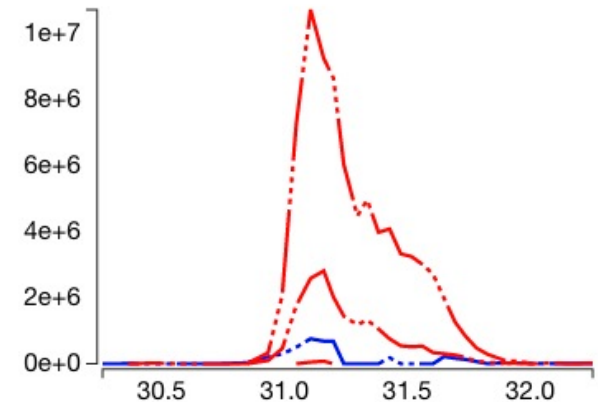

# H3.1\_K27-R40: Prop-KMe2SAPATGGVKMe3KPHR MS/MS

### Experimental spectrum

scan 3197  
 retention time 24.3min  
 precursor m/z 404.7455  
 precursor charge 4+

### Theoretical

M H<sup>4+</sup> 404.7465  
 MH Δ<sub>mass</sub> Da -0.0040  
 MH Δ<sub>mass</sub> ppm -2.5

### edit peptide

{Propionyl}K{Dimethyl}SAPATGGVK{Trimethyl}K{Propionyl}PHR

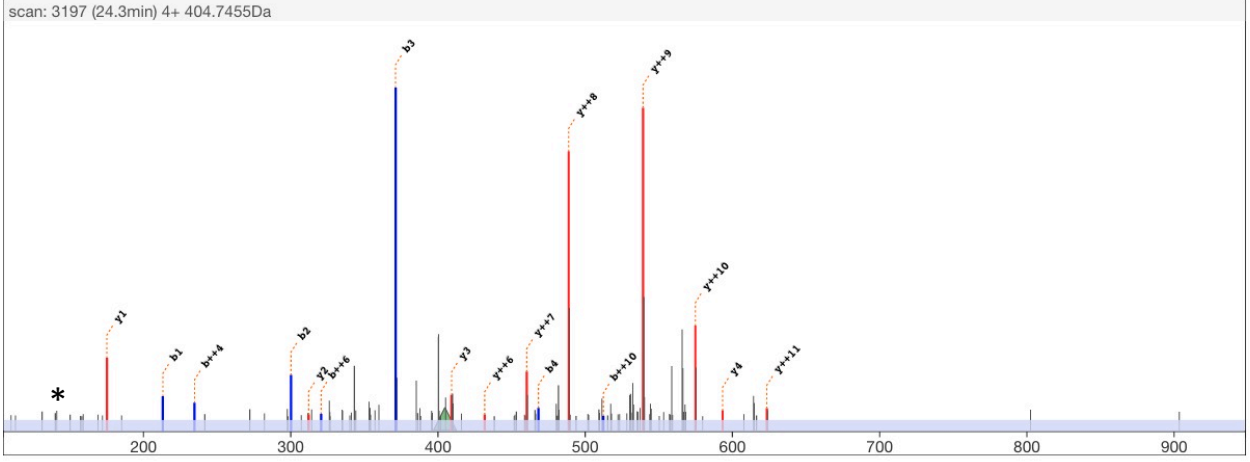

|    | b++    | b       |           | y       | y++    |    |
|----|--------|---------|-----------|---------|--------|----|
|    |        |         | Propionyl | 1559.94 | 780.47 | 14 |
| 1  | 107.08 | 213.16  | K         | 1403.81 | 702.41 | 13 |
| 2  | 150.60 | 300.19  | S         | 1316.78 | 658.89 | 12 |
| 3  | 186.12 | 371.23  | A         | 1245.74 | 623.37 | 11 |
| 4  | 234.64 | 468.28  | P         | 1148.69 | 574.85 | 10 |
| 5  | 270.16 | 539.32  | A         | 1077.65 | 539.33 | 9  |
| 6  | 320.69 | 640.37  | T         | 976.61  | 488.81 | 8  |
| 7  | 349.20 | 697.39  | G         | 919.58  | 460.30 | 7  |
| 8  | 377.71 | 754.41  | V         | 862.56  | 431.78 | 6  |
| 9  | 427.24 | 853.48  | G         | 763.49  | 382.25 | 5  |
| 10 | 512.31 | 1023.62 | K         | 593.35  | 297.18 | 4  |
| 11 | 604.37 | 1207.74 | Trimethyl | 409.23  | 205.12 | 3  |
| 12 | 652.90 | 1304.79 | K         | 312.18  | 156.59 | 2  |
| 13 | 721.43 | 1441.85 | Propionyl | 175.12  | 88.06  | 1  |
| 14 | 799.48 | 1597.95 | P         |         |        |    |
|    |        |         | H         |         |        |    |
|    |        |         | R         |         |        |    |

\* = 140Da diagnostic ion

# H3.1\_K27-R40: PIC-KMe2SAPATGGVKMe3KPHR MS/MS

### Experimental spectrum

scan 4471  
 retention time 31.4min  
 precursor m/z 420.4985  
 precursor charge 4+

### Theoretical

M H<sup>4+</sup> 420.4992  
 MH Δ<sub>mass</sub> Da -0.0031  
 MH Δ<sub>mass</sub> ppm -1.8

### edit peptide

{PIC}K{Dimethyl}SAPATGGVK{Trimethyl}K{Propionyl}PHR

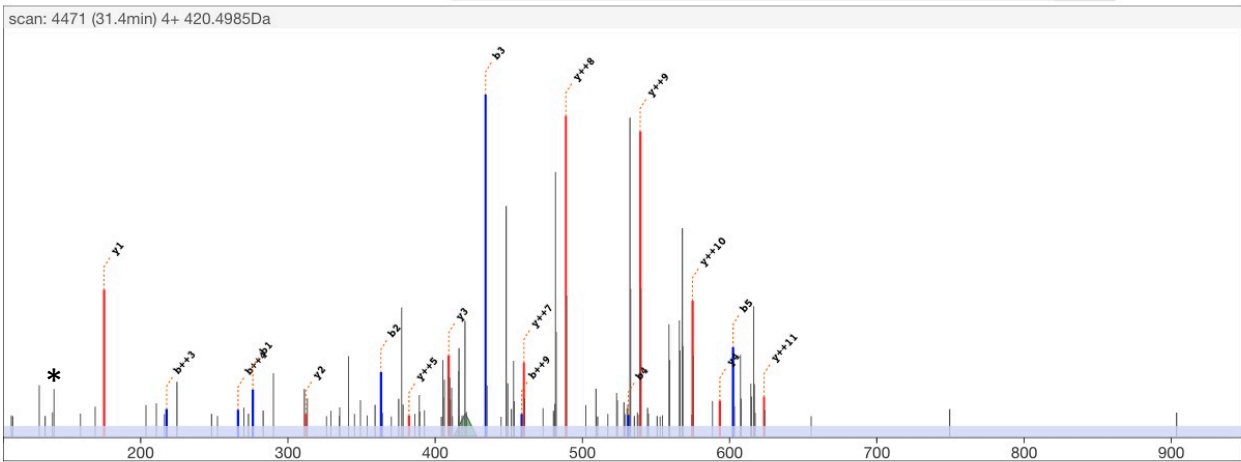

|    | b++    | b       |     | y       | y++    |    |
|----|--------|---------|-----|---------|--------|----|
|    | 60.53  | 120.04  | PIC | 1559.94 | 780.47 | 14 |
| 1  | 138.59 | 276.17  | K   | 1403.81 | 702.41 | 13 |
| 2  | 182.10 | 363.20  | S   | 1316.78 | 658.89 | 12 |
| 3  | 217.62 | 434.24  | A   | 1245.74 | 623.37 | 11 |
| 4  | 266.15 | 531.29  | P   | 1148.69 | 574.85 | 10 |
| 5  | 301.67 | 602.33  | A   | 1077.65 | 539.33 | 9  |
| 6  | 352.19 | 703.38  | T   | 976.61  | 488.81 | 8  |
| 7  | 380.70 | 760.40  | G   | 919.58  | 460.30 | 7  |
| 8  | 409.21 | 817.42  | G   | 862.56  | 431.78 | 6  |
| 9  | 458.75 | 916.49  | V   | 763.49  | 382.25 | 5  |
| 10 | 543.82 | 1086.63 | K   | 593.35  | 297.18 | 4  |
| 11 | 635.88 | 1270.75 | K   | 409.23  | 205.12 | 3  |
| 12 | 684.41 | 1367.80 | P   | 312.18  | 156.59 | 2  |
| 13 | 752.94 | 1504.86 | H   | 175.12  | 88.06  | 1  |
| 14 | 830.99 | 1660.96 | R   |         |        |    |

\* = 140Da diagnostic ion

# H3.1\_K27-R40:

KMe2SPropAPATGGVKMe3KPHR

Overlaps with K27Me3, K36Me2, S28Prop (see page 301).

| id list per inj.     | peptide                               | 2+      | 3+      | 4+      |
|----------------------|---------------------------------------|---------|---------|---------|
| 20130708_293THistone | H3.1K27Me2S28PropK36Me3 [prop_d0]     | 836.499 | 558.002 | 418.753 |
| 20130708_293THistone | H3.1K27Me2S28PropK36Me3 [pic,prop_d0] | 868.004 | 579.005 | 434.506 |

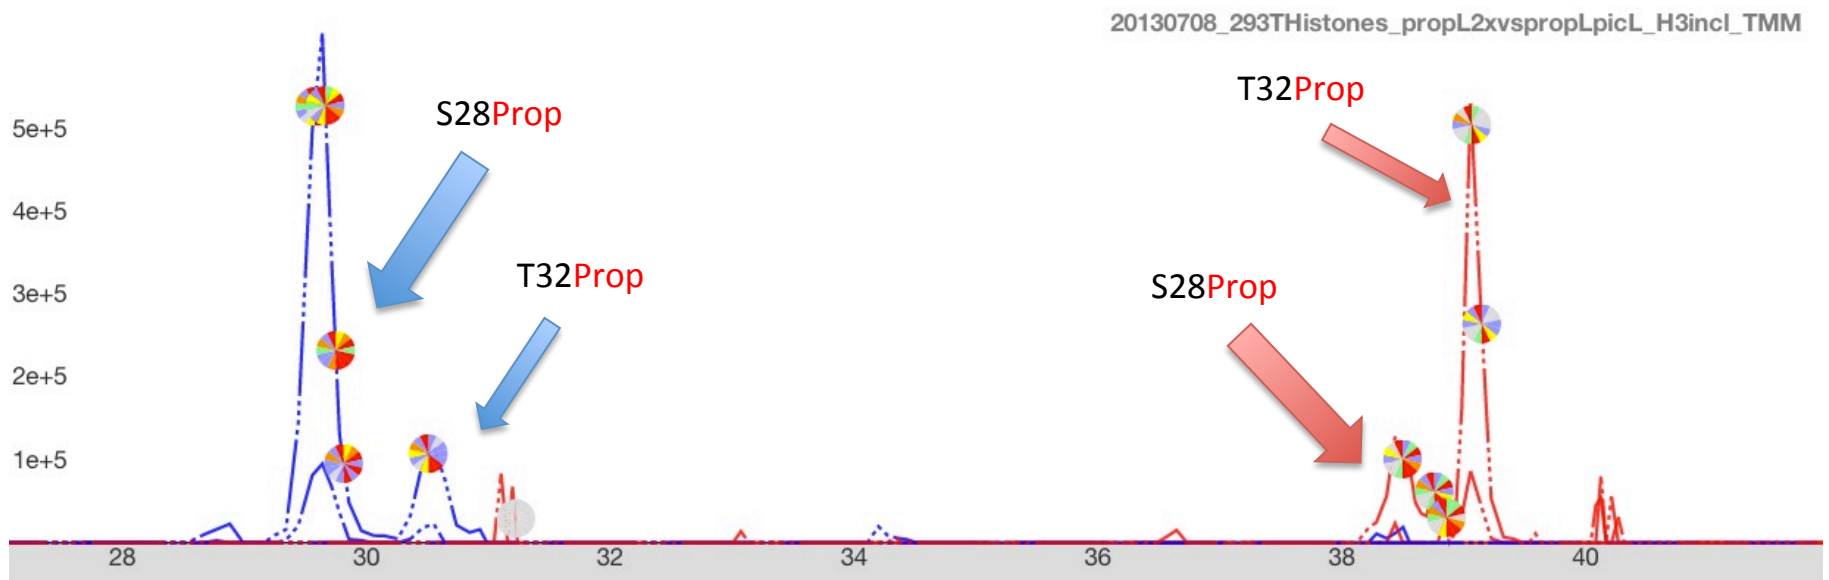





AUC calculation on MS2 level:

XIC-Prop 418.75 (4+)  
213.16, 356.22, 427.26, 488.81,  
539.33, 574.85

XIC-PIC 420.49 (4+)  
276.17, 419.23, 488.81, 490.27,  
539.33, 574.85

## Quanti event: 29.1-30.2min

x

| injection                                           | peptide                                  | charge | m/z      | auc    |
|-----------------------------------------------------|------------------------------------------|--------|----------|--------|
| 20130708_293THistones_propL2xvspropLpicL_H3incl_TMM | H3.1K27Me2S28PropK36Me3<br>[prop_d0]     | 2      | 836.4989 | 0.0e+0 |
| 20130708_293THistones_propL2xvspropLpicL_H3incl_TMM | H3.1K27Me2S28PropK36Me3<br>[pic,prop_d0] | 2      | 868.0043 | 0.0e+0 |
| 20130708_293THistones_propL2xvspropLpicL_H3incl_TMM | H3.1K27Me2S28PropK36Me3<br>[prop_d0]     | 3      | 558.0017 | 1.2e+6 |
| 20130708_293THistones_propL2xvspropLpicL_H3incl_TMM | H3.1K27Me2S28PropK36Me3<br>[pic,prop_d0] | 3      | 579.0053 | 0.0e+0 |
| 20130708_293THistones_propL2xvspropLpicL_H3incl_TMM | H3.1K27Me2S28PropK36Me3<br>[prop_d0]     | 4      | 418.7531 | 7.4e+6 |
| 20130708_293THistones_propL2xvspropLpicL_H3incl_TMM | H3.1K27Me2S28PropK36Me3<br>[pic,prop_d0] | 4      | 434.5058 | 0.0e+0 |

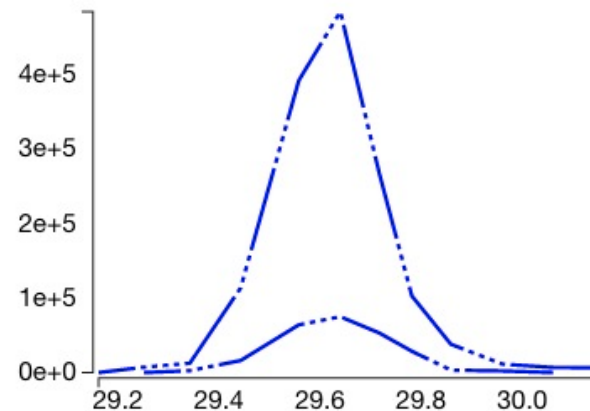

## Quanti event: 37.8-38.9min

x

| injection                                           | peptide                                  | charge | m/z      | auc    |
|-----------------------------------------------------|------------------------------------------|--------|----------|--------|
| 20130708_293THistones_propL2xvspropLpicL_H3incl_TMM | H3.1K27Me2S28PropK36Me3<br>[prop_d0]     | 2      | 836.4989 | 0.0e+0 |
| 20130708_293THistones_propL2xvspropLpicL_H3incl_TMM | H3.1K27Me2S28PropK36Me3<br>[pic,prop_d0] | 2      | 868.0043 | 7.4e+4 |
| 20130708_293THistones_propL2xvspropLpicL_H3incl_TMM | H3.1K27Me2S28PropK36Me3<br>[prop_d0]     | 3      | 558.0017 | 1.5e+5 |
| 20130708_293THistones_propL2xvspropLpicL_H3incl_TMM | H3.1K27Me2S28PropK36Me3<br>[pic,prop_d0] | 3      | 579.0053 | 5.5e+4 |
| 20130708_293THistones_propL2xvspropLpicL_H3incl_TMM | H3.1K27Me2S28PropK36Me3<br>[prop_d0]     | 4      | 418.7531 | 0.0e+0 |
| 20130708_293THistones_propL2xvspropLpicL_H3incl_TMM | H3.1K27Me2S28PropK36Me3<br>[pic,prop_d0] | 4      | 434.5058 | 1.9e+6 |

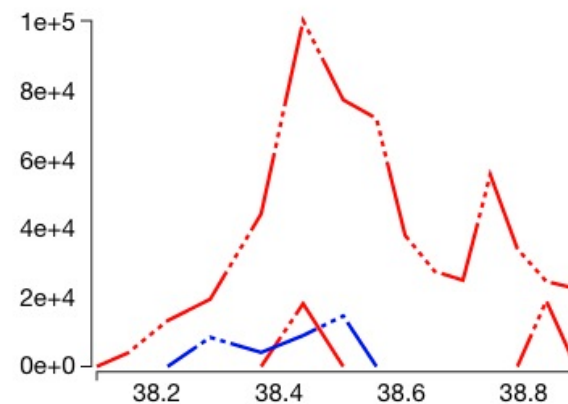

# H3.1\_K27-R40: Prop-KMe2SPropAPATGGVKMe3KPHR MS/MS

### Experimental spectrum

scan 4138  
 retention time 29.8min  
 precursor m/z 418.7528  
 precursor charge 4+

### Theoretical

M H<sup>4+</sup> 418.7531  
 MH Δ<sub>mass</sub> Da -0.0009  
 MH Δ<sub>mass</sub> ppm -0.6

### edit peptide

{Propionyl}K{Dimethyl}S{Propionyl}APATGGVK{Trimethyl}K{Propionyl}PHR align

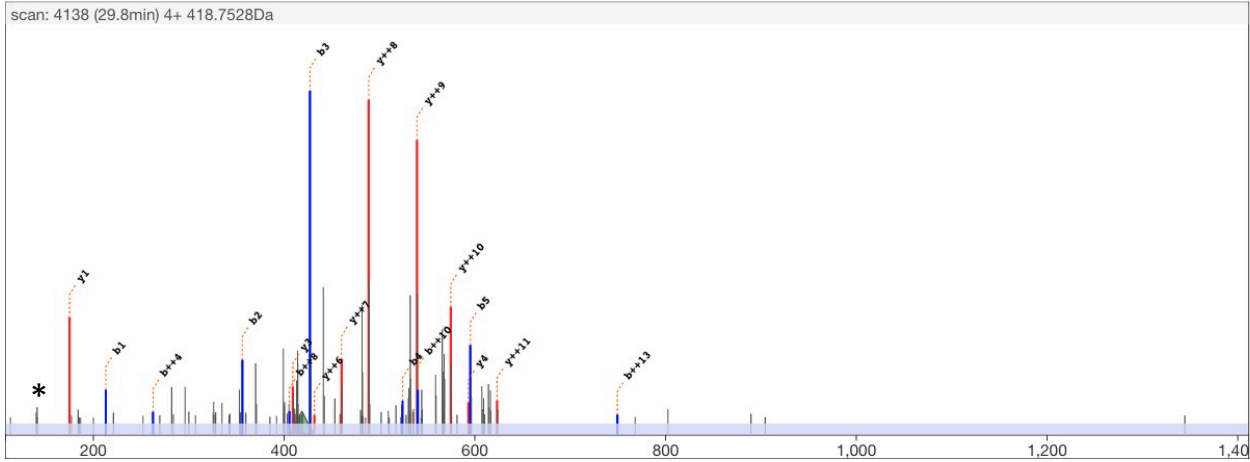

|    | b++    | b       |           | y       | y++    |    |
|----|--------|---------|-----------|---------|--------|----|
|    |        |         | Propionyl | 1615.96 | 808.49 | 14 |
| 1  | 107.08 | 213.16  | K         |         |        |    |
|    |        |         | Dimethyl  | 1459.84 | 730.42 | 13 |
| 2  | 178.61 | 356.22  | S         |         |        |    |
|    |        |         | Propionyl | 1316.78 | 658.89 | 12 |
| 3  | 214.13 | 427.26  | A         |         | 623.37 | 11 |
| 4  | 262.66 | 524.31  | P         |         | 574.85 | 10 |
| 5  | 298.18 | 595.34  | A         |         | 539.33 | 9  |
| 6  | 348.70 | 696.39  | T         |         | 488.81 | 8  |
| 7  | 377.21 | 753.41  | G         |         | 460.30 | 7  |
| 8  | 405.72 | 810.44  | V         |         | 431.78 | 6  |
| 9  | 455.26 | 909.50  | K         |         | 382.25 | 5  |
| 10 | 540.33 | 1079.65 | Trimethyl | 593.35  | 297.18 | 4  |
|    |        |         | K         |         |        |    |
| 11 | 632.39 | 1263.77 | Propionyl | 409.23  | 205.12 | 3  |
| 12 | 680.91 | 1360.82 | P         |         |        |    |
| 13 | 749.44 | 1497.88 | H         |         | 175.12 | 2  |
| 14 | 827.49 | 1653.98 | R         |         |        | 1  |

\* = 140Da diagnostic ion

# H3.1\_K27-R40: PIC-KMe2SPropAPATGGVKMe3KPHR MS/MS

**Experimental spectrum**

scan 6309  
 retention time 38.8min  
 precursor m/z 434.5055  
 precursor charge 4+

**Theoretical**

M H<sup>4+</sup> 434.5058  
 MH Δ<sub>mass</sub> Da -0.0013  
 MH Δ<sub>mass</sub> ppm -0.8

**edit peptide**

{PIC}K{Dimethyl}S{Propionyl}APATGGVK{Trimethyl}K{Propionyl}PHR

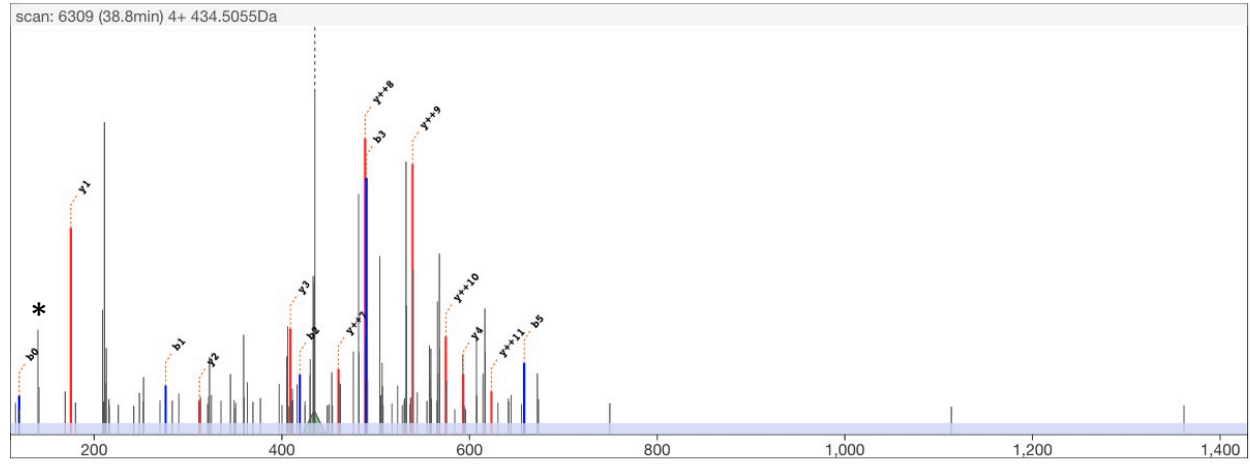

|    | b++    | b       |           | y       | y++    |    |
|----|--------|---------|-----------|---------|--------|----|
|    | 60.53  | 120.04  | PIC       | 1615.96 | 808.49 | 14 |
| 1  | 138.59 | 276.17  | K         | 1459.84 | 730.42 | 13 |
| 2  | 210.12 | 419.23  | S         | 1316.78 | 658.89 | 12 |
| 3  | 245.64 | 490.27  | Propionyl | 1245.74 | 623.37 | 11 |
| 4  | 294.16 | 587.32  | A         | 1148.69 | 574.85 | 10 |
| 5  | 329.68 | 658.36  | P         | 1077.65 | 539.33 | 9  |
| 6  | 380.21 | 759.40  | A         | 976.61  | 488.81 | 8  |
| 7  | 408.72 | 816.43  | T         | 919.58  | 460.30 | 7  |
| 8  | 437.23 | 873.45  | G         | 862.56  | 431.78 | 6  |
| 9  | 486.76 | 972.51  | V         | 763.49  | 382.25 | 5  |
| 10 | 571.83 | 1142.66 | K         | 593.35  | 297.18 | 4  |
| 11 | 663.89 | 1326.78 | Trimethyl | 409.23  | 205.12 | 3  |
| 12 | 712.42 | 1423.83 | K         | 312.18  | 156.59 | 2  |
| 13 | 780.95 | 1560.89 | Propionyl | 175.12  | 88.06  | 1  |
| 14 | 859.00 | 1716.99 | P         |         |        |    |
|    |        |         | H         |         |        |    |
|    |        |         | R         |         |        |    |

\* = 140Da diagnostic ion

# H3.1\_K27-R40:

KMe2SAPAT**Prop**GGVK**Me3**KPHR

Overlaps with K27Me3,K36Me2,T32Prop (see page 306).

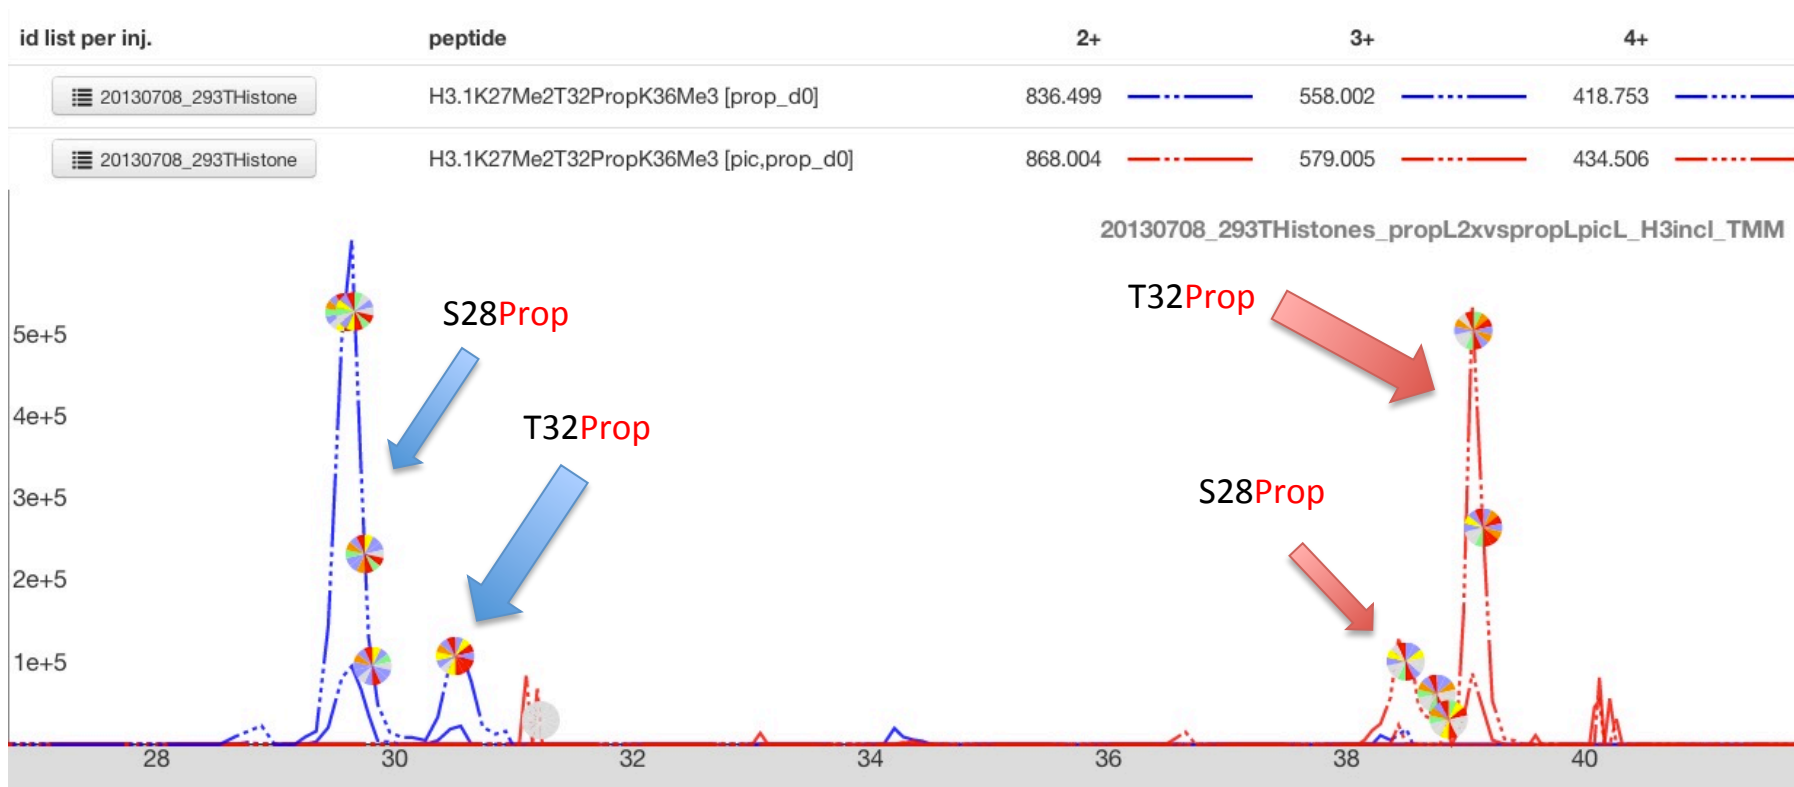



AUC calculation on MS2 level:

XIC-Prop 418.75 (4+)  
 213.16, 300.19, 371.23, 488.81,  
 567.34, 602.86

XIC-PIC 434.51 (4+)  
 276.17, 363.20, 434.24, 488.81,  
 567.34, 602.86, 651.39

## Quanti event: 30.2-31.0min

| injection                                           | peptide                                  | charge | m/z      | auc    |
|-----------------------------------------------------|------------------------------------------|--------|----------|--------|
| 20130708_293THistones_propL2xvspropLpicL_H3incl_TMM | H3.1K27Me2T32PropK36Me3<br>[prop_d0]     | 2      | 836.4989 | 0.0e+0 |
| 20130708_293THistones_propL2xvspropLpicL_H3incl_TMM | H3.1K27Me2T32PropK36Me3<br>[pic,prop_d0] | 2      | 868.0043 | 0.0e+0 |
| 20130708_293THistones_propL2xvspropLpicL_H3incl_TMM | H3.1K27Me2T32PropK36Me3<br>[prop_d0]     | 3      | 558.0017 | 2.0e+5 |
| 20130708_293THistones_propL2xvspropLpicL_H3incl_TMM | H3.1K27Me2T32PropK36Me3<br>[pic,prop_d0] | 3      | 579.0053 | 0.0e+0 |
| 20130708_293THistones_propL2xvspropLpicL_H3incl_TMM | H3.1K27Me2T32PropK36Me3<br>[prop_d0]     | 4      | 418.7531 | 1.7e+6 |
| 20130708_293THistones_propL2xvspropLpicL_H3incl_TMM | H3.1K27Me2T32PropK36Me3<br>[pic,prop_d0] | 4      | 434.5058 | 0.0e+0 |

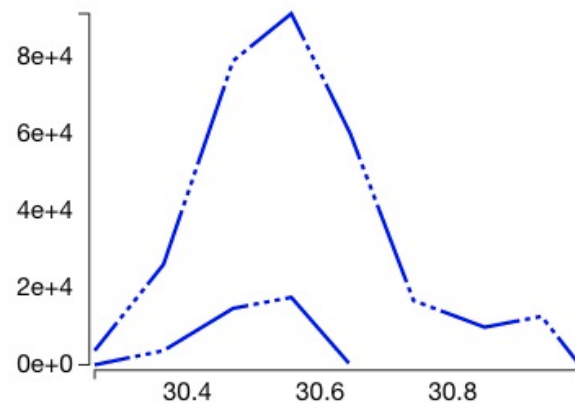

## Quanti event: 38.9-39.5min

| injection                                           | peptide                                  | charge | m/z      | auc    |
|-----------------------------------------------------|------------------------------------------|--------|----------|--------|
| 20130708_293THistones_propL2xvspropLpicL_H3incl_TMM | H3.1K27Me2T32PropK36Me3<br>[prop_d0]     | 2      | 836.4989 | 0.0e+0 |
| 20130708_293THistones_propL2xvspropLpicL_H3incl_TMM | H3.1K27Me2T32PropK36Me3<br>[pic,prop_d0] | 2      | 868.0043 | 0.0e+0 |
| 20130708_293THistones_propL2xvspropLpicL_H3incl_TMM | H3.1K27Me2T32PropK36Me3<br>[prop_d0]     | 3      | 558.0017 | 0.0e+0 |
| 20130708_293THistones_propL2xvspropLpicL_H3incl_TMM | H3.1K27Me2T32PropK36Me3<br>[pic,prop_d0] | 3      | 579.0053 | 6.4e+5 |
| 20130708_293THistones_propL2xvspropLpicL_H3incl_TMM | H3.1K27Me2T32PropK36Me3<br>[prop_d0]     | 4      | 418.7531 | 0.0e+0 |
| 20130708_293THistones_propL2xvspropLpicL_H3incl_TMM | H3.1K27Me2T32PropK36Me3<br>[pic,prop_d0] | 4      | 434.5058 | 3.9e+6 |

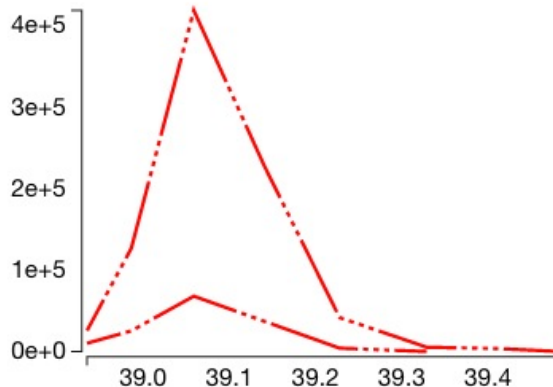

**Experimental spectrum**

scan 4266  
 retention time 30.5min  
 precursor m/z 418.7523  
 precursor charge 4+

**Theoretical**

M H<sup>4+</sup> 418.7531  
 MH Δ<sub>mass</sub> Da -0.0029  
 MH Δ<sub>mass</sub> ppm -1.7

**edit peptide**

{Propionyl}K{Dimethyl}SAPAT{Propionyl}GGVK{Trimethyl}K{Propionyl}PHR

scan: 4266 (30.5min) 4+ 418.7523Da

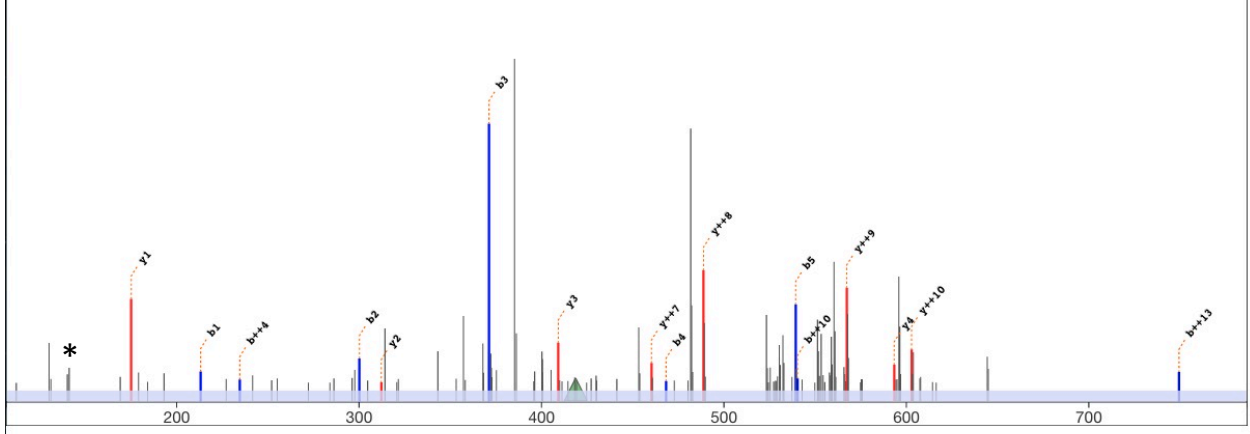

|    | b++    | b       |           | y       | y++    |    |
|----|--------|---------|-----------|---------|--------|----|
|    |        |         | Propionyl | 1615.96 | 808.49 | 14 |
| 1  | 107.08 | 213.16  | K         |         |        |    |
|    |        |         | Dimethyl  | 1459.84 | 730.42 | 13 |
| 2  | 150.60 | 300.19  | S         | 1372.81 | 686.91 | 12 |
| 3  | 186.12 | 371.23  | A         | 1301.77 | 651.39 | 11 |
| 4  | 234.64 | 468.28  | P         | 1204.72 | 602.86 | 10 |
| 5  | 270.16 | 539.32  | A         | 1133.68 | 567.34 | 9  |
| 6  | 348.70 | 696.39  | T         | 976.61  | 488.81 | 8  |
| 7  | 377.21 | 753.41  | Propionyl | 919.58  | 460.30 | 7  |
| 8  | 405.72 | 810.44  | G         | 862.56  | 431.78 | 6  |
| 9  | 455.26 | 909.50  | V         | 763.49  | 382.25 | 5  |
| 10 | 540.33 | 1079.65 | K         | 593.35  | 297.18 | 4  |
| 11 | 632.39 | 1263.77 | Trimethyl | 409.23  | 205.12 | 3  |
| 12 | 680.91 | 1360.82 | K         | 312.18  | 156.59 | 2  |
| 13 | 749.44 | 1497.88 | Propionyl | 175.12  | 88.06  | 1  |
| 14 | 827.49 | 1653.98 | P         |         |        |    |
|    |        |         | H         |         |        |    |
|    |        |         | R         |         |        |    |

\* = 140Da diagnostic ion



# H3.1\_K27-R40: PIC-KMe2SAPATPropGGVKMe3KPHR MS/MS

### Experimental spectrum

scan 6419  
 retention time 39.2min  
 precursor m/z 434.5058  
 precursor charge 4+

### Theoretical

M H<sup>4+</sup> 434.5058  
 MH Δ<sub>mass</sub> Da 0.0001  
 MH Δ<sub>mass</sub> ppm 0.1

### edit peptide

{PIC}K{Dimethyl}SAPAT{Propionyl}GGVK{Trimethyl}K{Propionyl}PHR align

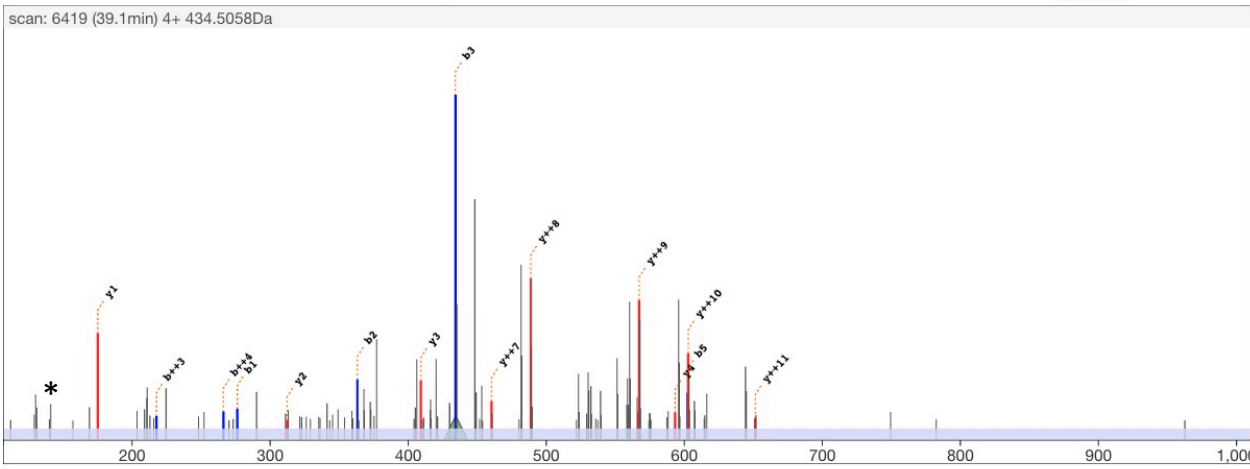

|    | b++    | b       |     | y       | y++    |    |
|----|--------|---------|-----|---------|--------|----|
|    | 60.53  | 120.04  | PIC | 1615.96 | 808.49 | 14 |
| 1  | 138.59 | 276.17  | K   | 1459.84 | 730.42 | 13 |
| 2  | 182.10 | 363.20  | S   | 1372.81 | 686.91 | 12 |
| 3  | 217.62 | 434.24  | A   | 1301.77 | 651.39 | 11 |
| 4  | 266.15 | 531.29  | P   | 1204.72 | 602.86 | 10 |
| 5  | 301.67 | 602.33  | A   | 1133.68 | 567.34 | 9  |
| 6  | 380.21 | 759.40  | T   | 976.61  | 488.81 | 8  |
| 7  | 408.72 | 816.43  | G   | 919.58  | 460.30 | 7  |
| 8  | 437.23 | 873.45  | V   | 862.56  | 431.78 | 6  |
| 9  | 486.76 | 972.51  | K   | 763.49  | 382.25 | 5  |
| 10 | 571.83 | 1142.66 | K   | 593.35  | 297.18 | 4  |
| 11 | 663.89 | 1326.78 | K   | 409.23  | 205.12 | 3  |
| 12 | 712.42 | 1423.83 | P   | 312.18  | 156.59 | 2  |
| 13 | 780.95 | 1560.89 | H   | 175.12  | 88.06  | 1  |
| 14 | 859.00 | 1716.99 | R   |         |        |    |

\* = 140Da diagnostic ion

# H3.1\_K27-R40:

KMe2SAPATGGVKAcKPHR

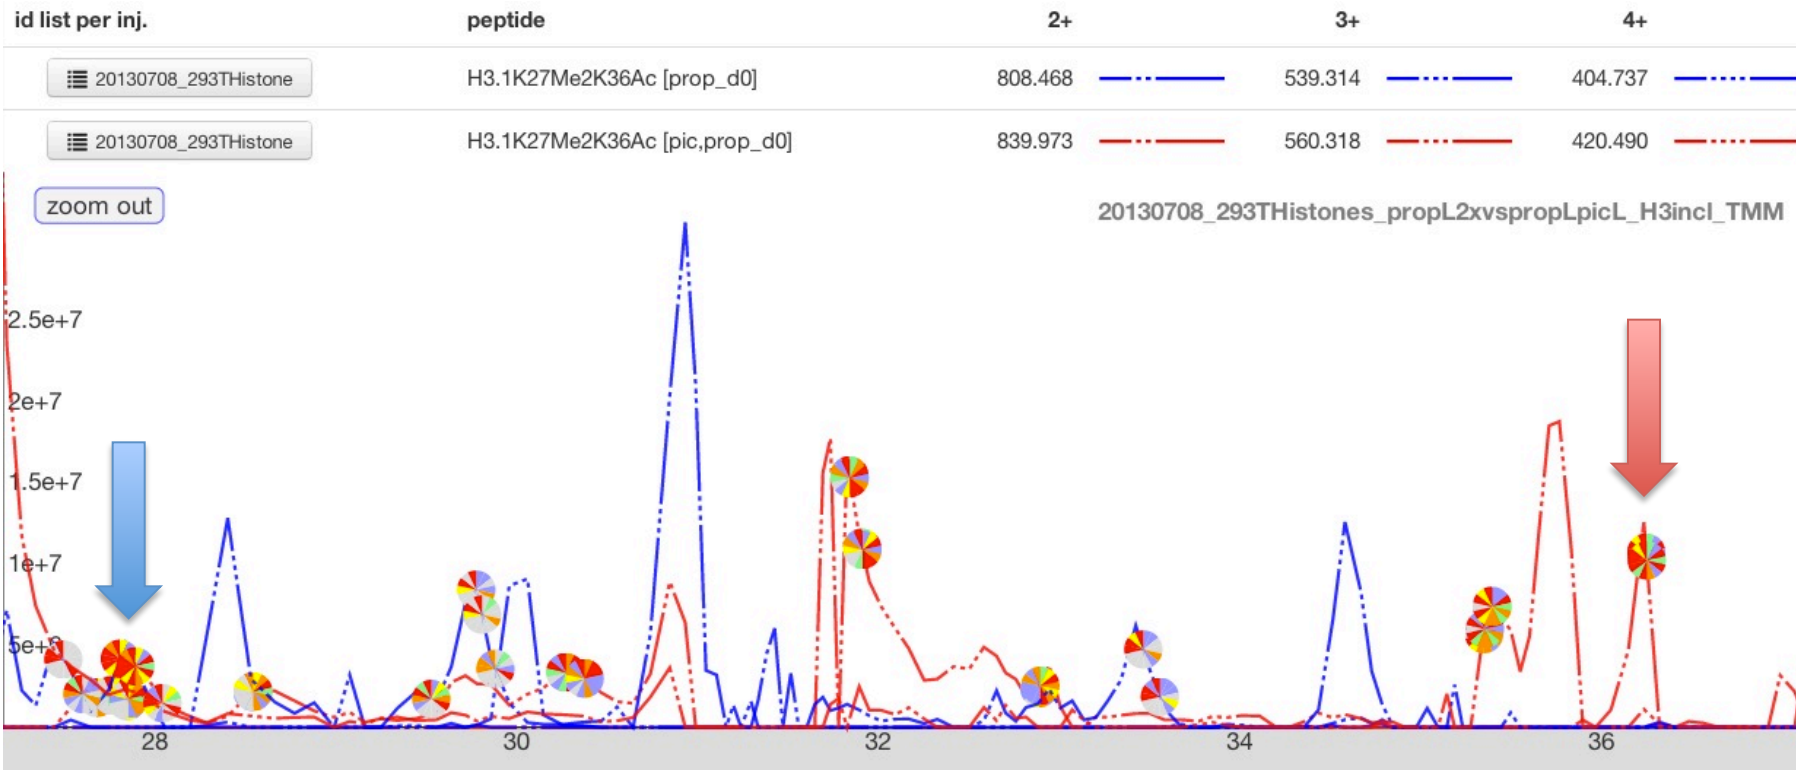

### Quanti event: 27.6-28.1min

| injection                                           | peptide                       | charge | m/z      | auc    |
|-----------------------------------------------------|-------------------------------|--------|----------|--------|
| 20130708_293THistones_propL2xvspropLpicL_H3incl_TMM | H3.1K27Me2K36Ac [prop_d0]     | 2      | 808.4676 | 0.0e+0 |
| 20130708_293THistones_propL2xvspropLpicL_H3incl_TMM | H3.1K27Me2K36Ac [pic,prop_d0] | 2      | 839.9730 | 0.0e+0 |
| 20130708_293THistones_propL2xvspropLpicL_H3incl_TMM | H3.1K27Me2K36Ac [prop_d0]     | 3      | 539.3141 | 1.2e+6 |
| 20130708_293THistones_propL2xvspropLpicL_H3incl_TMM | H3.1K27Me2K36Ac [pic,prop_d0] | 3      | 560.3178 | 9.5e+5 |
| 20130708_293THistones_propL2xvspropLpicL_H3incl_TMM | H3.1K27Me2K36Ac [prop_d0]     | 4      | 404.7374 | 0.0e+0 |
| 20130708_293THistones_propL2xvspropLpicL_H3incl_TMM | H3.1K27Me2K36Ac [pic,prop_d0] | 4      | 420.4901 | 1.0e+6 |

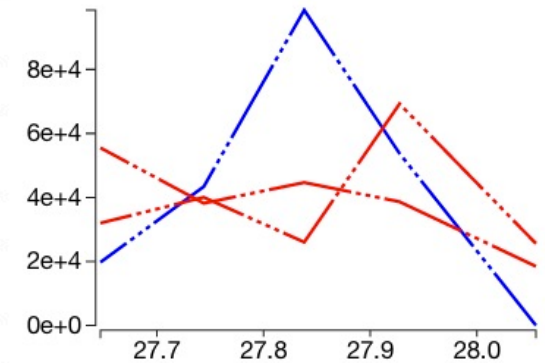

### Quanti event: 35.9-36.4min

| injection                                           | peptide                       | charge | m/z      | auc    |
|-----------------------------------------------------|-------------------------------|--------|----------|--------|
| 20130708_293THistones_propL2xvspropLpicL_H3incl_TMM | H3.1K27Me2K36Ac [prop_d0]     | 2      | 808.4676 | 0.0e+0 |
| 20130708_293THistones_propL2xvspropLpicL_H3incl_TMM | H3.1K27Me2K36Ac [pic,prop_d0] | 2      | 839.9730 | 2.1e+4 |
| 20130708_293THistones_propL2xvspropLpicL_H3incl_TMM | H3.1K27Me2K36Ac [prop_d0]     | 3      | 539.3141 | 3.1e+4 |
| 20130708_293THistones_propL2xvspropLpicL_H3incl_TMM | H3.1K27Me2K36Ac [pic,prop_d0] | 3      | 560.3178 | 1.9e+6 |
| 20130708_293THistones_propL2xvspropLpicL_H3incl_TMM | H3.1K27Me2K36Ac [prop_d0]     | 4      | 404.7374 | 0.0e+0 |
| 20130708_293THistones_propL2xvspropLpicL_H3incl_TMM | H3.1K27Me2K36Ac [pic,prop_d0] | 4      | 420.4901 | 1.3e+5 |

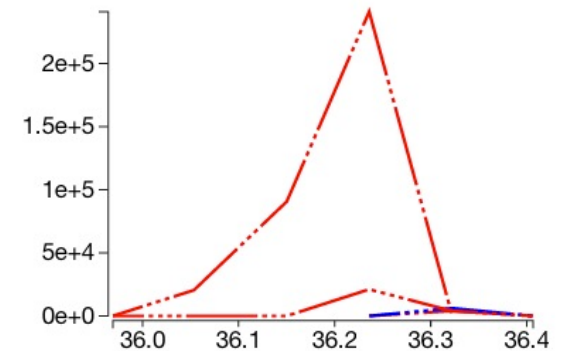

# H3.1\_K27-R40: Prop-KMe2SAPATGGVKAcKPHR MS/MS

### Experimental spectrum

scan 3837  
 retention time 27.8min  
 precursor m/z 539.3131  
 precursor charge 3+

### Theoretical

M H<sup>3+</sup> 539.3141  
 MH Δ<sub>mass</sub> Da -0.0031  
 MH Δ<sub>mass</sub> ppm -1.9

### edit peptide

{Propionyl}K(Dimethyl)SAPATGGVK(Acetyl)K{Propionyl}PHR

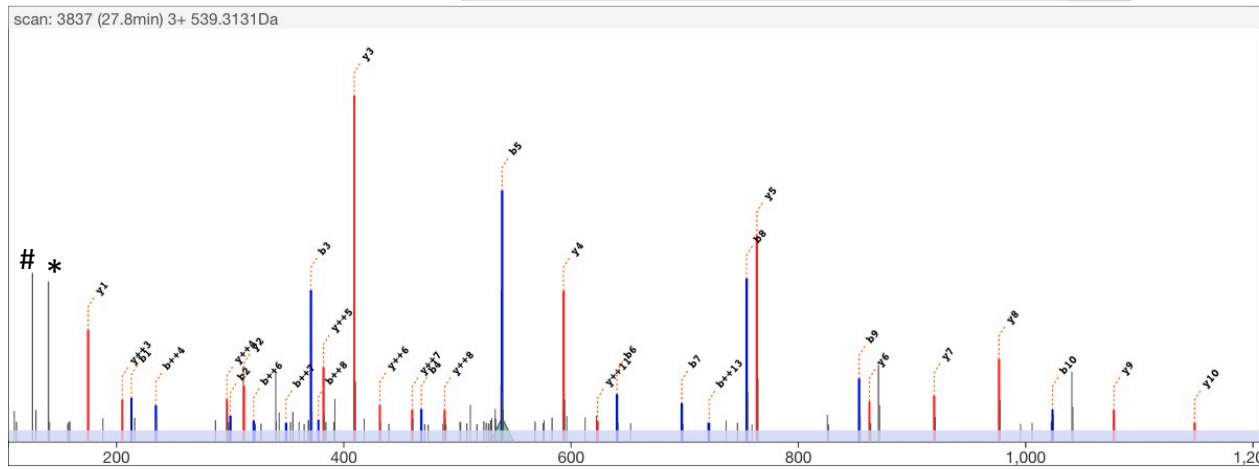

|    | b++    | b       |           | y       | y++    |    |
|----|--------|---------|-----------|---------|--------|----|
|    |        |         | Propionyl | 1559.90 | 780.45 | 14 |
| 1  | 107.08 | 213.16  | K         | 1403.78 | 702.39 | 13 |
|    |        |         | Dimethyl  |         |        |    |
| 2  | 150.60 | 300.19  | S         | 1316.74 | 658.88 | 12 |
| 3  | 186.12 | 371.23  | A         | 1245.71 | 623.36 | 11 |
| 4  | 234.64 | 468.28  | P         | 1148.65 | 574.83 | 10 |
| 5  | 270.16 | 539.32  | A         | 1077.62 | 539.31 | 9  |
| 6  | 320.69 | 640.37  | T         | 976.57  | 488.79 | 8  |
| 7  | 349.20 | 697.39  | G         | 919.55  | 460.28 | 7  |
| 8  | 377.71 | 754.41  | V         | 862.53  | 431.77 | 6  |
| 9  | 427.24 | 853.48  | K         | 763.46  | 382.23 | 5  |
| 10 | 512.30 | 1023.58 | Acetyl    | 593.35  | 297.18 | 4  |
| 11 | 604.36 | 1207.70 | Propionyl | 409.23  | 205.12 | 3  |
| 12 | 652.88 | 1304.76 | K         | 312.18  | 156.59 | 2  |
| 13 | 721.41 | 1441.82 | P         | 175.12  | 88.06  | 1  |
| 14 | 799.46 | 1597.92 | H         |         |        |    |
|    |        |         | R         |         |        |    |

\* = 140Da diagnostic ion  
 # = 126Da diagnostic ion

### Experimental spectrum

scan 5669  
 retention time 36.3min  
 precursor m/z 560.3165  
 precursor charge 3+

### Theoretical

M H<sup>3+</sup> 560.3178  
 MH Δ<sub>mass</sub> Da -0.0037  
 MH Δ<sub>mass</sub> ppm -2.2

### edit peptide

{PIC}K{Dimethyl}SAPATGGVK{Acetyl}K{Propionyl}PHR align

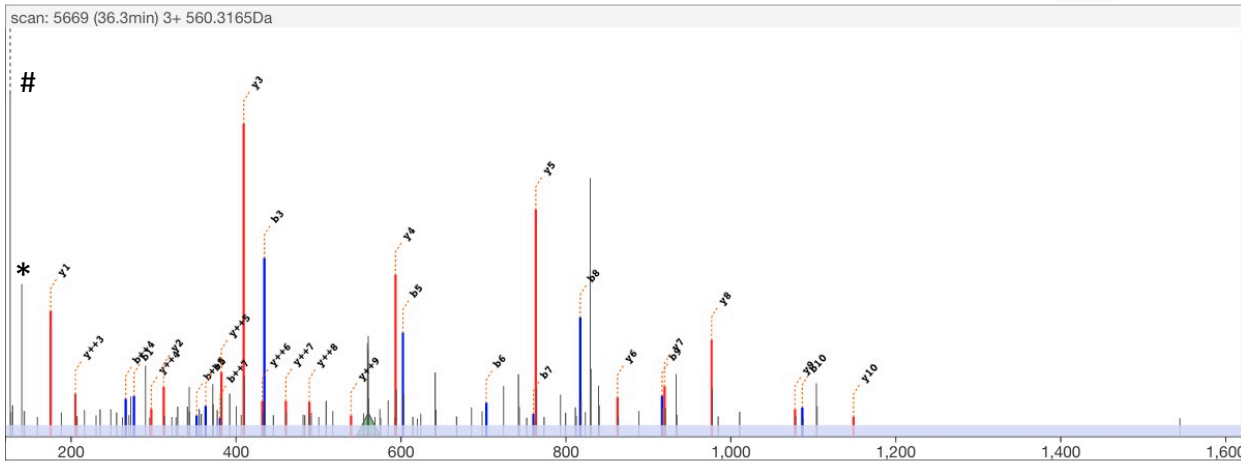

|    | b++    | b       |           | y       | y++    |    |
|----|--------|---------|-----------|---------|--------|----|
|    | 60.53  | 120.04  | PIC       | 1559.90 | 780.45 | 14 |
| 1  | 138.59 | 276.17  | K         | 1403.78 | 702.39 | 13 |
| 2  | 182.10 | 363.20  | S         | 1316.74 | 658.88 | 12 |
| 3  | 217.62 | 434.24  | A         | 1245.71 | 623.36 | 11 |
| 4  | 266.15 | 531.29  | P         | 1148.65 | 574.83 | 10 |
| 5  | 301.67 | 602.33  | A         | 1077.62 | 539.31 | 9  |
| 6  | 352.19 | 703.38  | T         | 976.57  | 488.79 | 8  |
| 7  | 380.70 | 760.40  | G         | 919.55  | 460.28 | 7  |
| 8  | 409.21 | 817.42  | V         | 862.53  | 431.77 | 6  |
| 9  | 458.75 | 916.49  | K         | 763.46  | 382.23 | 5  |
| 10 | 543.80 | 1086.59 | Acetyl    | 593.35  | 297.18 | 4  |
| 11 | 635.86 | 1270.72 | Propionyl | 409.23  | 205.12 | 3  |
| 12 | 684.39 | 1367.77 | K         | 312.18  | 156.59 | 2  |
| 13 | 752.92 | 1504.83 | P         | 175.12  | 88.06  | 1  |
| 14 | 830.97 | 1660.93 | H         |         |        |    |
|    |        |         | R         |         |        |    |

\* = 140Da diagnostic ion

# = 126Da diagnostic ion
